# Supplementary material for: Identification of Thalidomide-Specific Transcriptomics and Proteomics Signatures during Differentiation of Human Embryonic Stem Cells
Source: PLoS One. 2012 Aug 28;7(8):e44228. doi: 10.1371/journal.pone.0044228 (PMC3429450; doi:10.1371/journal.pone.0044228)
Supplement: Table S2 — A) The F-statistics output for the time kinetic experiments. B to I). The T-statistics output for the time kinetic experiments. (XLS) [file pone.0044228.s006.xls]

## Sheet: Table S2A_F Statictics
Probe ID	Gene Symbol	Gene Title	Entrez Gene ID	Day03	Day06	Day09	Day12	Day15	Day18	Day21	AveExpr	F	P.Value	adj.P.Val
1007_s_at	DDR1	discoidin domain receptor tyrosine kinase 1	780	1.54405	1.22791	1.34953	1.30088	1.75097	1.93399	2.24364	10.1183	81.1543	3.02108e-15	2.82509e-14
1053_at	RFC2	replication factor C (activator 1) 2, 40kDa	5982	1.19538	-1.13762	-1.26317	-1.35078	-1.43522	-1.59363	-1.90971	8.38729	46.2476	1.76462e-12	8.82855e-12
121_at	PAX8	paired box 8	7849	1.01814	1.08167	1.06523	-1.08829	1.04223	1.17478	1.21735	8.70722	7.57651	7.26585e-05	0.000112169
1255_g_at	GUCA1A	guanylate cyclase activator 1A (retina)	2978	1.29058	-1.16083	-1.77661	-2.22233	-2.8203	-2.07848	-3.11358	7.24561	137.261	6.64611e-18	1.27095e-16
1487_at	ESRRA	estrogen-related receptor alpha	2101	-1.03377	-1.21424	-1.18804	-1.2004	-1.26576	-1.19864	-1.22909	8.06801	7.61218	7.01032e-05	0.000108444
1552256_a_at	SCARB1	scavenger receptor class B, member 1	949	1.01864	-1.30033	-1.24205	-1.21205	-1.31545	-1.05007	-1.15281	7.22069	7.58041	7.23741e-05	0.000111744
1552257_a_at	TTLL12	tubulin tyrosine ligase-like family, member 12	23170	1.59367	1.00906	-1.04309	-1.14727	-1.15792	-1.1761	-1.3274	8.18894	54.9517	2.5664e-13	1.55091e-12
1552263_at	MAPK1	mitogen-activated protein kinase 1	5594	-1.56125	-2.04805	-2.24224	-2.91915	-3.17193	-3.59733	-3.70147	6.1217	113.667	6.05835e-17	8.9771e-16
1552264_a_at	MAPK1	mitogen-activated protein kinase 1	5594	-1.19152	-1.70314	-1.733	-1.92969	-2.06388	-1.92933	-2.23316	6.88756	40.5978	7.4374e-12	3.27047e-11
1552274_at	PXK	PX domain containing serine/threonine kinase	54899	-1.03342	-1.01209	1.25584	1.66767	1.37445	2.08777	2.32272	6.60633	60.3753	8.86778e-14	5.92198e-13
1552276_a_at	VPS18	vacuolar protein sorting 18 homolog (S. cerevisiae)	57617	-1.22002	-1.14378	-1.21357	-1.32344	-1.30406	-1.17886	-1.26984	6.46595	8.43249	3.16047e-05	5.06327e-05
1552277_a_at	C9orf30	chromosome 9 open reading frame 30	91283	-1.35196	-1.49062	-1.50898	-1.52349	-1.40985	-1.46207	-1.40808	8.36907	19.9322	1.32586e-08	3.28596e-08
1552281_at	SLC39A5	solute carrier family 39 (metal ion transporter), member 5	283375	-1.03298	1.05767	1.02514	-1.03873	-1.17587	1.11567	1.0324	8.05415	5.75471	0.000523909	0.000741242
1552287_s_at	AFG3L1	AFG3 ATPase family gene 3-like 1 (S. cerevisiae)	172	2.64675	2.79212	2.80596	3.13422	4.01724	2.18416	2.34812	7.5941	83.0953	2.30077e-15	2.22783e-14
1552291_at	PIGX	phosphatidylinositol glycan anchor biosynthesis, class X	54965	1.10938	-1.23749	-1.21187	1.18855	1.25027	1.05831	1.00378	7.0897	8.94526	1.96828e-05	3.22544e-05
1552309_a_at	NEXN	nexilin (F actin binding protein)	91624	-1.71655	-1.82893	-1.46428	1.08632	-1.35952	-1.51587	-1.82099	6.97204	42.4541	4.54848e-12	2.08792e-11
1552310_at	C15orf40	chromosome 15 open reading frame 40	123207	-1.14087	-1.37899	-1.32816	-1.08317	-1.12269	-1.35363	-1.35841	6.89401	8.24051	3.79134e-05	6.02705e-05
1552329_at	RBBP6	retinoblastoma binding protein 6	5930	1.52859	1.81884	2.19367	2.58248	2.48977	2.08347	2.40375	7.17125	44.8955	2.45223e-12	1.19281e-11
1552343_s_at	PDE7A	phosphodiesterase 7A	5150	1.227	1.97602	1.94353	1.8039	2.17645	1.32246	1.52248	6.65674	37.9443	1.55802e-11	6.44148e-11
1552344_s_at	CNOT7	CCR4-NOT transcription complex, subunit 7	29883	-1.38606	-1.40825	-1.40733	-1.80016	-1.66206	-2.42196	-2.15213	7.30066	34.8732	3.89487e-11	1.49671e-10
1552347_at	CRYZL1	crystallin, zeta (quinone reductase)-like 1	9946	1.15127	1.64426	1.79877	2.31187	2.61734	2.01182	2.51907	7.35899	49.51	8.26048e-13	4.42567e-12
1552362_a_at	LEAP2	liver expressed antimicrobial peptide 2	116842	1.0885	1.16003	1.24742	1.47198	1.31502	1.43398	1.52044	6.54386	13.6605	4.99958e-07	9.88895e-07
1552388_at	FLJ30901	hypothetical protein FLJ30901	150378	1.07258	1.02604	1.2519	1.25461	1.52254	1.25675	1.33259	7.0708	16.3243	9.366e-08	2.04608e-07
1552390_a_at	C8orf47	chromosome 8 open reading frame 47	203111	-4.86689	-9.5105	-9.66783	-11.3399	-10.7497	-12.9119	-10.8037	4.59908	206.194	5.42884e-20	1.89214e-18
1552417_a_at	NEDD1	neural precursor cell expressed, developmentally down-regulated 1	121441	-1.66298	-1.08167	1.13437	1.11733	1.05021	-1.48861	-1.64456	7.23516	29.1225	2.67634e-10	8.79709e-10
1552426_a_at	TM2D3	TM2 domain containing 3	80213	-1.09469	1.02931	-1.1288	1.07766	1.20091	1.02647	1.43783	9.33979	15.2551	1.7852e-07	3.74864e-07
1552473_at	GAMT	guanidinoacetate N-methyltransferase	2593	-1.06994	-1.18964	-1.2036	-1.33941	-1.3328	-1.26492	-1.32091	8.16381	10.5875	4.82387e-06	8.45302e-06
1552485_at	LACTB	lactamase, beta	114294	-1.69449	-2.52494	-2.48878	-2.26253	-2.40216	-2.3795	-2.23834	5.6233	37.5685	1.73651e-11	7.11479e-11
1552486_s_at	LACTB	lactamase, beta	114294	-1.47641	-3.05754	-2.87471	-2.32531	-3.02431	-2.68095	-3.00669	5.80438	67.1635	2.64222e-14	1.97907e-13
1552487_a_at	BNC1	basonuclin 1	646	-2.57811	-1.32403	1.38216	3.27036	1.69118	3.35407	2.96728	5.86914	271.538	2.05248e-21	1.1276e-19
1552497_a_at	SLAMF6	SLAM family member 6	114836	1.03771	1.15096	1.17379	-1.03313	1.07653	1.33192	1.19502	6.94645	5.87509	0.000455368	0.00064855
1552503_at	FRAS1	Fraser syndrome 1	80144	-1.08833	1.00812	-1.06878	-1.26988	-1.17647	-1.09866	-1.04624	6.82834	6.05604	0.000369856	0.000531607
1552520_at	TMEM74	transmembrane protein 74	157753	-1.26424	1.08334	-1.06176	-1.48969	-1.55357	-1.59853	-1.52298	6.86187	23.7321	2.26352e-09	6.35989e-09
1552524_at	ART5	ADP-ribosyltransferase 5	116969	-1.12773	1.01177	1.19227	1.43113	-1.06748	1.19662	-1.0607	7.30329	17.8311	3.98362e-08	9.19605e-08
1552557_a_at	ZDHHC15	zinc finger, DHHC-type containing 15	158866	-1.21771	-1.29437	-1.36992	-1.34463	-1.49095	-1.44619	-1.39253	6.61107	7.71577	6.32158e-05	9.82351e-05
1552558_a_at	RAI1	retinoic acid induced 1	10743	-1.08601	-1.18597	-1.1412	-1.31117	-1.27129	-1.11397	-1.16087	6.75842	8.51618	2.92182e-05	4.70214e-05
1552575_a_at	C6orf141	chromosome 6 open reading frame 141	135398	1.65118	1.93658	1.66991	1.23724	1.00001	-1.07797	-1.55742	6.35483	42.2606	4.78332e-12	2.18682e-11
1552580_at	TRIML2	tripartite motif family-like 2	205860	-1.81724	-2.47572	-2.82442	-3.90463	-4.10498	-3.97957	-3.73071	6.22082	118.282	3.8048e-17	5.92922e-16
1552602_at	CACNG5	calcium channel, voltage-dependent, gamma subunit 5	27091	-1.05152	-1.05435	-1.15527	-1.29267	-1.33643	-1.13932	-1.12643	6.87202	7.51601	7.72249e-05	0.000118865
1552611_a_at	JAK1	Janus kinase 1	3716	-1.51512	-1.69071	-1.43667	-1.03392	-1.02393	1.08289	1.00493	8.03957	30.3922	1.70197e-10	5.81167e-10
1552617_a_at	RFWD2	ring finger and WD repeat domain 2	64326	-1.27072	-1.38134	-1.25249	-1.32372	-1.34093	-1.64363	-1.42064	8.68054	20.915	8.18489e-09	2.09477e-08
1552618_at	STX6	syntaxin 6	10228	-1.20781	-1.22927	-1.16751	-1.48098	-1.43795	-1.42872	-1.39834	8.21265	13.4149	5.90607e-07	1.15707e-06
1552619_a_at	ANLN	anillin, actin binding protein	54443	-1.26627	-1.11776	-1.03981	-1.45453	-1.59126	-2.44238	-2.59548	8.02534	63.2607	5.22209e-14	3.65391e-13
1552621_at	POLR2J2	polymerase (RNA) II (DNA directed) polypeptide J2	246721	1.79264	2.37731	2.16519	2.48516	2.6663	1.74611	1.91311	7.90378	49.7196	7.87994e-13	4.24548e-12
1552622_s_at	LOC100134053 /// LOC441259 /// PMS2L12 /// POLR2J2 /// POLR2J4	similar to POLR2J4 protein /// PMS2 postmeiotic segregation increased 2 (S. cerevisiae)-like /// postmeiotic segregation increased 2-like 12 pseudogene /// polymerase (RNA) II (DNA directed) polypeptide J2 /// polymerase (RNA) II (DNA directed) polypeptide J4, pseudogene	100134053 /// 246721 /// 392713 /// 441259 /// 84820	2.23329	3.15939	3.42898	3.39376	3.75139	2.41138	2.75014	6.27333	75.9687	6.45496e-15	5.56022e-14
1552625_a_at	TRNT1	tRNA nucleotidyl transferase, CCA-adding, 1	51095	1.00765	1.0179	1.03721	-1.15556	-1.20119	-1.74559	-1.77267	7.0894	22.4239	4.04292e-09	1.08989e-08
1552626_a_at	TMEM163	transmembrane protein 163	81615	-1.10677	-1.15863	-1.01018	1.33515	1.45948	1.68519	2.4191	6.43834	16.2066	1.00386e-07	2.18216e-07
1552627_a_at	ARHGAP5	Rho GTPase activating protein 5	394	-1.10238	1.06299	1.3149	1.29244	1.39696	-1.23682	-1.09373	7.18669	21.2693	6.91e-09	1.7904e-08
1552628_a_at	HERPUD2	HERPUD family member 2	64224	1.3156	1.31047	1.42764	2.06358	1.71154	1.83531	1.56389	8.37515	31.9294	1.00546e-10	3.57746e-10
1552633_at	ZNF101	zinc finger protein 101	94039	-1.1951	-1.14048	-1.21338	-1.33167	-1.29813	-1.39718	-1.41609	6.60109	7.35951	9.05388e-05	0.000138201
1552634_a_at	ZNF101	zinc finger protein 101	94039	-1.72	-2.21931	-2.57727	-3.01255	-3.28781	-3.27492	-3.75835	5.85241	38.2326	1.43456e-11	5.98063e-11
1552641_s_at	ATAD3A /// ATAD3B /// LOC732419	ATPase family, AAA domain containing 3A /// ATPase family, AAA domain containing 3B /// similar to AAA-ATPase TOB3	55210 /// 732419 /// 83858	1.0721	-1.1377	-1.16106	-1.18115	-1.18298	-1.21217	-1.25144	7.20716	6.51058	0.000222465	0.000326564
1552643_at	ZNF626	zinc finger protein 626	199777	-1.24517	-1.03039	1.05468	1.13146	1.01807	1.08194	1.28534	6.97087	19.2578	1.86732e-08	4.52707e-08
1552648_a_at	TNFRSF10A	tumor necrosis factor receptor superfamily, member 10a	8797	-1.38994	-1.49455	-1.48662	-1.76553	-1.88654	-1.82293	-2.21669	6.08686	22.6506	3.64897e-09	9.90903e-09
1552663_a_at	ERC1	ELKS/RAB6-interacting/CAST family member 1	23085	1.01443	1.17775	1.23338	1.05656	1.05975	1.26742	1.14768	7.86923	7.29778	9.64547e-05	0.000146773
1552664_at	FLCN	folliculin	201163	1.19976	-1.4504	-1.50858	-1.61416	-1.38362	-1.67565	-1.9589	7.25409	32.9276	7.22886e-11	2.64463e-10
1552676_at	UCN3	urocortin 3 (stresscopin)	114131	1.01251	-1.1328	-1.07876	-1.30284	-1.36162	-1.10132	-1.29506	6.92381	13.3363	6.23247e-07	1.21752e-06
1552678_a_at	USP28	ubiquitin specific peptidase 28	57646	1.18513	-1.30098	-1.2449	-1.52088	-1.56226	-1.72717	-1.92514	7.52902	31.422	1.19327e-10	4.18992e-10
1552680_a_at	CASC5	cancer susceptibility candidate 5	57082	-1.3582	1.30994	1.62148	1.20164	1.26997	-1.29198	-1.36047	7.07031	17.5068	4.76472e-08	1.08906e-07
1552684_a_at	SENP8	SUMO/sentrin specific peptidase family member 8	123228	-1.50052	-1.40332	-1.40339	-1.47902	-1.95061	-1.66907	-1.55062	6.21952	17.1834	5.711e-08	1.29022e-07
1552685_a_at	GRHL1	grainyhead-like 1 (Drosophila)	29841	1.08135	1.27741	1.42134	1.03034	1.0777	1.07633	1.02966	6.90161	6.53154	0.000217415	0.000319368
1552701_a_at	CARD16	caspase recruitment domain family, member 16	114769	-1.16496	-1.04031	1.17325	1.61604	1.04043	4.31322	8.77012	4.55194	226.534	1.77572e-20	7.2628e-19
1552711_a_at	CYB5D1	cytochrome b5 domain containing 1	124637	1.08426	1.2249	1.80163	3.99704	1.74346	1.70306	-1.20922	8.49584	253.672	4.61923e-21	2.27721e-19
1552712_a_at	NMNAT2	nicotinamide nucleotide adenylyltransferase 2	23057	1.17628	1.0075	1.0735	1.09533	1.46122	1.29697	1.95479	7.87794	30.0559	1.91567e-10	6.47742e-10
1552719_at	CASC4	cancer susceptibility candidate 4	113201	1.156	1.45394	1.54728	1.4506	1.74514	1.35145	1.49169	7.17607	22.6743	3.61023e-09	9.80898e-09
1552736_a_at	NETO1	neuropilin (NRP) and tolloid (TLL)-like 1	81832	-2.16688	-2.55046	-2.73262	-2.72203	-2.41188	-2.37135	-2.19591	5.90182	45.9403	1.90018e-12	9.4394e-12
1552742_at	KCNH8	potassium voltage-gated channel, subfamily H (eag-related), member 8	131096	1.03491	1.0687	1.15214	1.31377	2.24772	1.94334	3.24369	5.43384	77.779	4.92518e-15	4.34848e-14
1552767_a_at	HS6ST2	heparan sulfate 6-O-sulfotransferase 2	90161	1.01696	2.03334	1.75953	1.55786	1.55745	1.93068	1.63641	9.3231	42.9488	4.00298e-12	1.86458e-11
1552790_a_at	SEC62	SEC62 homolog (S. cerevisiae)	7095	-1.07142	1.03107	1.05823	1.79387	2.03155	1.72392	2.60926	7.5877	97.5454	3.5981e-16	4.26232e-15
1552884_at	NKX6-3	NK6 homeobox 3	157848	-1.22933	-1.09923	-1.19516	-1.37294	-1.4335	-1.29127	-1.25271	6.39758	7.48773	7.94652e-05	0.000122132
1552897_a_at	KCNG3	potassium voltage-gated channel, subfamily G, member 3	170850	3.16505	-1.05641	-1.83507	-3.22544	-3.23462	-2.96195	-3.05175	5.61996	174.697	3.86949e-19	1.04295e-17
1552946_at	ZNF114	zinc finger protein 114	163071	1.04273	-1.79029	-1.87627	-2.37019	-1.97773	-2.97349	-3.18567	6.11172	91.7811	7.29253e-16	8.00264e-15
1552947_x_at	ZNF114	zinc finger protein 114	163071	1.02842	-1.55525	-1.88693	-2.28811	-1.99272	-2.50439	-2.648	6.23691	73.1897	9.89672e-15	8.1782e-14
1552977_a_at	CNPY3	canopy 3 homolog (zebrafish)	10695	1.30413	1.18259	1.10025	1.22991	1.02908	-1.04486	-1.17196	6.61672	6.76758	0.00016833	0.00025017
1552995_at	IL27	interleukin 27	246778	-1.08043	-1.07371	-1.07021	-1.28213	-1.22249	-1.14572	-1.1034	7.42505	5.54629	0.000670235	0.000938488
1553027_a_at	KLHL4	kelch-like 4 (Drosophila)	56062	-1.09836	-1.62581	-1.63648	-2.25002	-2.41616	-2.31746	-2.30361	6.53106	27.7613	4.43363e-10	1.4024e-09
1553047_at	PIP4K2B	phosphatidylinositol-5-phosphate 4-kinase, type II, beta	8396	-1.10235	1.00836	-1.15881	-1.34063	-1.11415	-1.03984	-1.1343	6.80293	5.56587	0.000654778	0.000918035
1553060_at	PSKH2	protein serine kinase H2	85481	1.12387	1.23701	1.11696	1.05927	-1.02547	1.0412	-1.06442	6.7035	6.58298	0.000205534	0.000302669
1553099_at	TIGD1	tigger transposable element derived 1	200765	1.48563	1.22197	1.14835	1.82545	1.76079	1.56038	2.4602	7.03503	23.3206	2.70855e-09	7.51341e-09
1553101_a_at	ALKBH5	alkB, alkylation repair homolog 5 (E. coli)	54890	1.33409	1.08381	1.12787	1.25662	1.18437	1.3418	1.22224	8.40446	10.8318	3.96437e-06	7.0166e-06
1553103_at	NFX1	nuclear transcription factor, X-box binding 1	4799	1.20933	-1.08778	-1.18482	-1.19008	-1.18723	-1.42056	-1.59	8.20021	30.8761	1.43856e-10	4.98106e-10
1553105_s_at	DSG2	desmoglein 2	1829	1.28625	-1.12464	1.03072	1.12779	-1.23119	-1.34443	-2.56179	7.8404	62.628	5.85355e-14	4.06286e-13
1553106_at	C5orf24	chromosome 5 open reading frame 24	134553	1.12327	1.27827	1.50564	2.35307	1.97378	1.37657	1.27262	6.28388	25.4524	1.09853e-09	3.2533e-09
1553107_s_at	C5orf24	chromosome 5 open reading frame 24	134553	-1.11725	1.0618	1.21789	1.43929	1.49854	1.25994	1.35046	8.12264	14.508	2.86138e-07	5.83688e-07
1553111_a_at	KBTBD6	kelch repeat and BTB (POZ) domain containing 6	89890	1.6413	1.46887	1.50845	2.277	2.78163	1.88509	2.55398	7.06247	35.0301	3.7103e-11	1.43151e-10
1553118_at	THEM4	thioesterase superfamily member 4	117145	-1.00519	-1.30636	-1.26314	1.1207	1.26602	1.10164	-1.0174	6.63871	19.5231	1.63013e-08	3.9882e-08
1553131_a_at	GATA4	GATA binding protein 4	2626	-1.02943	1.09582	1.02589	-1.11607	-1.01216	1.19088	1.02021	6.69675	5.87656	0.00045459	0.000647585
1553145_at	FLJ39653	hypothetical FLJ39653	202020	1.49885	2.69504	2.92738	2.80759	3.35759	2.27703	2.41149	7.32774	89.6438	9.57957e-16	1.02267e-14
1553156_at	LHX4	LIM homeobox 4	89884	-1.14868	-1.08674	-1.15118	-1.28226	-1.32296	-1.06705	-1.16837	6.53314	5.74718	0.000528547	0.000747396
1553169_at	LRRN4	leucine rich repeat neuronal 4	164312	-1.12817	1.21183	1.53467	1.63933	1.31922	2.09627	2.58234	7.35079	88.4445	1.11946e-15	1.17668e-14
1553171_x_at	LRRN4	leucine rich repeat neuronal 4	164312	-1.1099	1.42504	2.07751	2.26347	1.69495	2.97711	3.98063	7.07011	91.2395	7.80999e-16	8.50928e-15
1553172_at	ZNF777	zinc finger protein 777	27153	1.64518	1.14537	1.3956	1.60683	1.75248	1.64281	1.51813	7.5588	22.6788	3.60297e-09	9.79132e-09
1553179_at	ADAMTS19	ADAM metallopeptidase with thrombospondin type 1 motif, 19	171019	1.15327	1.40792	1.49413	1.17257	-1.22372	-1.68269	-2.41011	7.32175	116.559	4.51701e-17	6.89409e-16
1553180_at	ADAMTS19	ADAM metallopeptidase with thrombospondin type 1 motif, 19	171019	1.26761	1.49827	1.48524	1.36684	-1.14331	-1.75431	-2.7517	6.27648	58.1376	1.3594e-13	8.70815e-13
1553185_at	RASEF	RAS and EF-hand domain containing	158158	2.39508	2.32507	2.5174	2.0543	2.78178	2.10397	1.6232	10.984	43.1002	3.85048e-12	1.80067e-11
1553186_x_at	RASEF	RAS and EF-hand domain containing	158158	2.19465	2.32484	2.61633	2.17527	2.85974	2.08085	1.80161	11.2166	75.8999	6.52246e-15	5.61347e-14
1553218_a_at	ZNF512	zinc finger protein 512	84450	-1.0535	1.05901	1.0971	1.11486	1.14017	1.20887	1.32552	8.68959	10.6629	4.53893e-06	7.97851e-06
1553235_at	PCDHAC1	protocadherin alpha subfamily C, 1	56135	-1.215	-1.19218	-1.21819	-1.38412	-1.3166	-1.16173	-1.21	6.80605	6.80068	0.000162463	0.000241811
1553252_a_at	BRWD3	bromodomain and WD repeat domain containing 3	254065	1.10428	1.04359	1.19333	-1.0738	-1.11842	-1.2953	-1.32412	7.35752	15.1883	1.86071e-07	3.89302e-07
1553262_a_at	UTS2R	urotensin 2 receptor	2837	-1.10435	-1.14307	-1.1687	-1.20682	-1.29408	-1.08936	-1.16552	8.97151	7.23391	0.000103016	0.000156318
1553274_a_at	SNRNP48	small nuclear ribonucleoprotein 48kDa (U11/U12)	154007	-1.0687	1.13038	1.08418	-1.01586	-1.1204	-1.36348	-1.77453	6.36225	13.7367	4.75019e-07	9.42586e-07
1553286_at	ZNF555	zinc finger protein 555	148254	-1.47473	-1.19796	-1.26955	-1.25628	-1.30694	-1.28622	-1.31051	7.05235	7.83619	5.61142e-05	8.76775e-05
1553292_s_at	FLJ25006	uncharacterized serine/threonine-protein kinase SgK494	124923	2.12749	1.97951	2.04134	1.99633	3.14349	1.93245	2.40083	6.26591	53.2179	3.67985e-13	2.13999e-12
1553304_at	LSM14B	LSM14B, SCD6 homolog B (S. cerevisiae)	149986	1.40428	-1.0605	1.33949	1.03269	1.11426	-1.11652	-1.06331	6.38355	13.2451	6.63606e-07	1.29208e-06
1553306_at	CASP8	caspase 8, apoptosis-related cysteine peptidase	841	-1.04525	1.08884	-1.02971	-1.23173	-1.01717	1.17304	1.00932	6.54048	8.30972	3.54947e-05	5.65991e-05
1553313_s_at	SLC5A3	solute carrier family 5 (sodium/myo-inositol cotransporter), member 3	6526	1.13247	1.73175	2.38916	1.91975	1.86311	1.41413	1.54388	6.5107	30.2559	1.78533e-10	6.07233e-10
1553349_at	ARID2	AT rich interactive domain 2 (ARID, RFX-like)	196528	1.78311	2.77819	2.71595	2.67933	3.30106	2.42858	1.95758	7.27313	97.326	3.69343e-16	4.3514e-15
1553394_a_at	TFAP2B	transcription factor AP-2 beta (activating enhancer binding protein 2 beta)	7021	-1.09643	3.62184	3.8359	6.13556	5.89949	2.50106	5.01486	7.26138	199.128	8.2106e-20	2.68147e-18
1553400_a_at	C17orf69	chromosome 17 open reading frame 69	147081	1.3485	1.4319	1.29982	1.4108	1.58907	1.67993	1.78254	6.5762	17.8034	4.04478e-08	9.33199e-08
1553411_s_at	SALL3	sal-like 3 (Drosophila)	27164	3.11833	1.27109	1.22625	-1.18867	-1.0163	-1.05027	-1.30527	6.62323	124.642	2.06094e-17	3.4192e-16
1553422_s_at	A2BP1	ataxin 2-binding protein 1	54715	-1.10303	1.05513	-1.04426	-1.05698	1.13909	1.37207	1.56576	6.44071	26.8187	6.36941e-10	1.96228e-09
1553478_at	PRR10	proline rich 10	283165	-1.1419	-1.21937	-1.39607	-1.54352	-1.41663	-1.27734	-1.26542	6.32373	6.82112	0.00015895	0.000236746
1553510_s_at	RQCD1	RCD1 required for cell differentiation1 homolog (S. pombe)	9125	-1.28089	-1.48554	-1.43698	-1.52849	-1.45784	-1.81065	-1.37823	7.71204	12.8729	8.60038e-07	1.65136e-06
1553528_a_at	TAF5	TAF5 RNA polymerase II, TATA box binding protein (TBP)-associated factor, 100kDa	6877	1.50134	1.04339	1.04534	1.12085	1.20829	-1.18223	1.037	7.83192	11.6652	2.07582e-06	3.80491e-06
1553530_a_at	ITGB1	integrin, beta 1 (fibronectin receptor, beta polypeptide, antigen CD29 includes MDF2, MSK12)	3688	-2.51651	-2.73578	-2.12763	-2.0354	-2.34985	-3.27074	-4.66425	9.34061	92.7732	6.4385e-16	7.14406e-15
1553538_s_at	COX1	cytochrome c oxidase I	4512	1.48933	1.20704	1.23598	1.31982	1.25657	1.06932	1.11077	14.1876	23.242	2.80382e-09	7.75823e-09
1553551_s_at	ND2	NADH dehydrogenase, subunit 2 (complex I)	4536	1.02648	-1.1555	-1.0733	-1.36996	-1.29861	-1.87197	-1.32654	12.3558	27.8793	4.24034e-10	1.34536e-09
1553567_s_at	LOC100133315	similar to hCG1640299	100133315	1.06304	-1.12743	-1.06597	-1.16525	-1.14316	-1.27707	-1.14274	13.719	9.83139	9.0372e-06	1.53688e-05
1553569_at	COX2 /// ZFYVE20	cytochrome c oxidase II /// zinc finger, FYVE domain containing 20	4513 /// 64145	1.03428	-1.1614	-1.06182	-1.12429	-1.07597	-1.25795	-1.06994	14.2414	10.1686	6.80332e-06	1.1747e-05
1553570_x_at	COX2 /// ZFYVE20	cytochrome c oxidase II /// zinc finger, FYVE domain containing 20	4513 /// 64145	1.0455	-1.14966	-1.05321	-1.0949	-1.0587	-1.23983	-1.05664	14.2854	9.83793	8.98702e-06	1.52925e-05
1553575_at	ND6	NADH dehydrogenase, subunit 6 (complex I)	4541	1.16323	-1.16317	-1.15696	-1.02271	-1.05084	-1.22523	-1.32933	8.52801	6.66661	0.000187684	0.000277471
1553581_s_at	SFRS12IP1	SFRS12-interacting protein 1	285672	-1.22838	-1.01173	-1.15281	-1.27103	-1.42658	-1.4824	-1.48324	9.73431	7.90655	5.23673e-05	8.20455e-05
1553587_a_at	POLE4	polymerase (DNA-directed), epsilon 4 (p12 subunit)	56655	-1.40017	-1.20864	-1.26198	-1.20446	-1.35224	-1.25357	-1.17516	8.29426	8.41422	3.21535e-05	5.14706e-05
1553611_s_at	KLHL35	kelch-like 35 (Drosophila)	283212	1.04791	1.0831	1.12139	1.70492	2.05151	1.71147	3.59053	7.87353	82.2393	2.59247e-15	2.4697e-14
1553612_at	ZNF354B	zinc finger protein 354B	117608	1.06993	1.3142	1.13833	1.14115	1.00007	1.12764	1.26586	6.57464	7.05168	0.000124529	0.000187415
1553613_s_at	FOXC1	forkhead box C1	2296	2.48214	4.00638	5.59612	2.94006	7.08043	3.46874	1.84641	7.19046	134.568	8.38828e-18	1.5615e-16
1553614_a_at	FLJ25694	hypothetical protein FLJ25694	100128202	-1.27799	4.42637	3.047	3.14238	1.48374	-1.17475	-1.39166	5.96355	241.336	8.36299e-21	3.77149e-19
1553677_a_at	TIPRL	TIP41, TOR signaling pathway regulator-like (S. cerevisiae)	261726	-1.5435	-1.25092	-1.10759	1.05921	-1.11685	-1.02133	1.1237	7.91716	9.69733	1.01354e-05	1.71275e-05
1553678_a_at	ITGB1	integrin, beta 1 (fibronectin receptor, beta polypeptide, antigen CD29 includes MDF2, MSK12)	3688	-2.4879	-2.61821	-2.11156	-1.92865	-2.07702	-2.82033	-3.76204	9.16459	53.0884	3.78183e-13	2.19339e-12
1553689_s_at	METTL6	methyltransferase like 6	131965	-1.21211	-1.4644	-1.46191	-1.59846	-1.66389	-2.01227	-1.96201	7.45236	31.0477	1.35603e-10	4.71736e-10
1553693_s_at	CBR4	carbonyl reductase 4	84869	2.04549	4.01158	3.60791	3.57367	4.38487	2.31024	3.17166	7.80988	127.24	1.61817e-17	2.75877e-16
1553696_s_at	ZNF569	zinc finger protein 569	148266	1.04843	1.15491	1.05488	-1.12105	-1.21945	-1.54	1.06886	6.44286	11.5138	2.32898e-06	4.23869e-06
1553709_a_at	PRPF38A	PRP38 pre-mRNA processing factor 38 (yeast) domain containing A	84950	1.14958	-1.07604	-1.17011	-1.28647	-1.48373	-1.82483	-2.12434	8.95196	67.438	2.52215e-14	1.89791e-13
1553713_a_at	RHEBL1	Ras homolog enriched in brain like 1	121268	-1.10319	-1.07311	-1.18634	-1.30109	-1.25171	-1.19435	-1.46389	7.01263	8.47462	3.03779e-05	4.88e-05
1553715_s_at	C16orf14	chromosome 16 open reading frame 14	84331	-1.26626	-1.34699	-1.31609	-1.57553	-1.81451	-1.69984	-1.88478	8.71617	36.7299	2.21999e-11	8.9126e-11
1553717_at	KCTD7	potassium channel tetramerisation domain containing 7	154881	-1.0514	1.08423	1.13811	1.00841	1.22102	1.26547	1.17929	7.14148	7.18192	0.000108713	0.000164528
1553720_a_at	FAM123A	family with sequence similarity 123A	219287	1.22102	1.19201	1.24717	1.18745	1.72991	1.50319	2.2999	7.22559	41.572	5.73151e-12	2.57893e-11
1553764_a_at	JUB	jub, ajuba homolog (Xenopus laevis)	84962	-1.69659	-1.50595	-1.36114	1.0445	1.07955	-1.28881	-1.25416	7.58239	28.2174	3.73493e-10	1.19569e-09
1553810_a_at	KIAA1524	KIAA1524	57650	1.19033	1.16792	-1.05652	-1.36187	-1.32367	-2.04317	-1.8844	7.3898	50.8814	6.08665e-13	3.36964e-12
1553843_at	C10orf67	chromosome 10 open reading frame 67	256815	-1.16928	-1.11426	-1.14939	-1.33065	-1.24465	-1.15877	-1.1188	7.04629	7.22973	0.000103462	0.000156967
1553858_at	ZBTB3	zinc finger and BTB domain containing 3	79842	1.05207	-1.57498	-1.73955	-1.8503	-1.75977	-1.74006	-1.85061	7.42363	55.2853	2.39737e-13	1.45725e-12
1553874_a_at	ZSCAN10	zinc finger and SCAN domain containing 10	84891	1.25628	-1.31905	-1.36836	-1.58048	-1.72311	-1.67671	-1.99937	6.502	25.2731	1.18214e-09	3.48618e-09
1553875_s_at	ZSCAN10	zinc finger and SCAN domain containing 10	84891	1.04776	-1.19788	-1.30691	-2.14624	-1.89072	-1.85638	-2.32386	7.51201	73.1599	9.94296e-15	8.20856e-14
1553909_x_at	FAM178A	family with sequence similarity 178, member A	55719	1.43293	1.98241	1.82871	2.08747	2.13244	2.0786	1.86927	7.30489	50.2057	7.06817e-13	3.85538e-12
1553918_at	C21orf129	chromosome 21 open reading frame 129	150135	-1.00328	1.2335	1.44205	1.21238	1.10862	1.50335	1.20511	6.43027	15.8718	1.22549e-07	2.63261e-07
1553928_at	ELMOD2	ELMO/CED-12 domain containing 2	255520	-2.0882	-1.41534	-1.27137	-1.6147	-2.30738	-2.44343	-2.42761	6.89131	35.334	3.37935e-11	1.3134e-10
1553934_at	C18orf20	chromosome 18 open reading frame 20	221241	1.0885	1.15393	1.16228	2.93153	2.48285	7.28827	7.62083	5.28189	152.33	1.95051e-18	4.33408e-17
1553940_a_at	LRRC28	leucine rich repeat containing 28	123355	-1.82628	-1.66391	-1.63658	-1.62609	-1.88603	-1.88316	-1.64332	6.17978	24.1119	1.9224e-09	5.47017e-09
1553947_at	EXOSC6	exosome component 6	118460	1.47685	-1.0214	1.16489	1.06923	1.08774	1.02005	-1.06974	6.44822	9.95731	8.12197e-06	1.38944e-05
1553954_at	ALG14	asparagine-linked glycosylation 14 homolog (S. cerevisiae)	199857	-1.61396	-1.40733	-1.32526	-1.112	-1.34009	-1.35499	-1.20465	7.47558	18.6032	2.62822e-08	6.2251e-08
1553955_at	KLRAQ1	KLRAQ motif containing 1	129285	1.10684	1.19516	1.15592	1.20337	1.16486	-1.0197	1.33046	8.31623	8.69735	2.46918e-05	4.00427e-05
1553956_at	ALS2CR4	amyotrophic lateral sclerosis 2 (juvenile) chromosome region, candidate 4	65062	-1.35484	-1.22714	-1.29096	-1.32065	-1.30186	-1.68715	-1.4853	9.04083	15.7904	1.28703e-07	2.75726e-07
1553957_at	ZNF564	zinc finger protein 564	163050	-1.30925	-1.04492	1.01505	-1.11277	-1.19217	-1.26972	-1.22205	7.04964	8.65234	2.57409e-05	4.16529e-05
1553959_a_at	B3GALT6	UDP-Gal:betaGal beta 1,3-galactosyltransferase polypeptide 6	126792	1.19368	-1.07904	1.03939	1.07748	1.18024	1.14403	1.11578	8.83233	7.19991	0.000106704	0.000161611
1553960_at	SNX21	sorting nexin family member 21	90203	1.3003	-1.09707	-1.0004	1.33854	1.27793	1.72603	1.38167	6.78055	35.6172	3.09953e-11	1.21154e-10
1553971_a_at	GATS	GATS, stromal antigen 3 opposite strand	352954	1.14097	1.23513	1.20637	1.54523	1.87528	1.8438	2.10338	7.27635	45.7008	2.01364e-12	9.94986e-12
1553972_a_at	CBS	cystathionine-beta-synthase	875	1.17258	-1.2908	-1.2989	-1.61021	-1.6124	-1.92162	-3.5433	9.39305	150.316	2.2817e-18	4.98456e-17
1553974_at	C22orf39	chromosome 22 open reading frame 39	128977	1.07284	-1.05715	-1.07304	1.28692	1.29413	-1.00182	1.13518	7.22642	11.177	3.01993e-06	5.42875e-06
1553976_a_at	RP11-529I10.4	deleted in a mouse model of primary ciliary dyskinesia	25911	-1.41344	-1.48699	-1.32949	-1.18729	-1.3532	-1.04055	-1.23193	8.52293	11.5264	2.30672e-06	4.20054e-06
1553978_at	LOC100133072 /// LOC729991	hypothetical protein LOC100133072 /// hypothetical protein LOC729991	100133072 /// 729991	-1.06269	-1.45365	-1.49796	-1.40498	-1.62266	-1.4685	-1.89833	7.11345	22.8662	3.31262e-09	9.05445e-09
1553979_at	---	---	---	1.09561	-1.15283	-1.33681	-1.6604	-1.68695	-2.39865	-2.48475	10.7185	96.2321	4.21133e-16	4.87953e-15
1553984_s_at	DTYMK	deoxythymidylate kinase (thymidylate kinase)	1841	-1.0801	-1.05881	1.00891	-1.01092	1.01036	-1.26254	-1.18954	10.0042	9.74047	9.76709e-06	1.65428e-05
1553987_at	C12orf47	chromosome 12 open reading frame 47	51275	-1.47903	-1.45144	-1.49445	-1.62515	-1.65619	-1.65213	-1.45253	9.14317	19.6015	1.56645e-08	3.84436e-08
1553991_s_at	FLJ20674	hypothetical protein FLJ20674	54621	1.67181	-1.7592	-2.10604	-2.45692	-2.08626	-2.47656	-2.52251	6.18272	64.8409	3.94492e-14	2.8455e-13
1553993_s_at	MED25	mediator complex subunit 25	81857	2.19483	1.193	1.41438	1.69381	1.82931	2.04905	1.83056	8.50748	66.2858	3.06956e-14	2.26482e-13
1553997_a_at	ASPHD1	aspartate beta-hydroxylase domain containing 1	253982	1.0171	-1.28295	-1.28164	-1.24376	-1.23077	1.07771	1.07473	7.32178	16.3269	9.35172e-08	2.04313e-07
1553998_at	DMRTC1 /// DMRTC1B	DMRT-like family C1 /// DMRT-like family C1B	63947 /// 728656	-1.11652	1.01139	-1.04146	1.19383	1.31032	1.47868	1.73279	6.7993	19.925	1.3307e-08	3.29731e-08
1554007_at	---	---	---	-1.17337	-1.8845	-2.86993	-3.85025	-3.45199	-5.56556	-5.08749	9.59061	232.534	1.30127e-20	5.51504e-19
1554012_at	RSPO2	R-spondin 2 homolog (Xenopus laevis)	340419	-1.03576	1.67812	6.124	27.0745	7.24754	17.8783	9.2359	6.42984	814.11	3.90973e-27	1.65552e-24
1554017_at	RILPL1	Rab interacting lysosomal protein-like 1	353116	-1.01227	1.1726	1.11393	1.05261	1.16041	1.26837	1.31437	6.58913	9.53463	1.16658e-05	1.95847e-05
1554020_at	BICD1	bicaudal D homolog 1 (Drosophila)	636	-1.14292	-2.95001	-4.08377	-3.83278	-4.74028	-3.97135	-6.24162	6.49562	152.771	1.88516e-18	4.2069e-17
1554021_a_at	ZNF12	zinc finger protein 12	7559	1.02889	1.2239	1.20392	1.43154	1.25045	1.32247	1.41091	7.87086	5.84828	0.000469747	0.000668112
1554047_at	TXNDC9	thioredoxin domain containing 9	10190	-1.62811	-1.59226	-1.83465	-2.19722	-2.257	-2.25486	-2.2303	6.06391	29.1312	2.6679e-10	8.77044e-10
1554050_at	SMPDL3B	sphingomyelin phosphodiesterase, acid-like 3B	27293	-1.14041	-1.10724	-1.22323	-1.36532	-1.5051	-1.15973	-1.27879	7.34597	6.26292	0.00029274	0.00042503
1554059_at	SETMAR	SET domain and mariner transposase fusion gene	6419	-1.06819	1.02415	1.02962	-1.20173	-1.27092	-1.13903	-1.01162	7.55209	5.51536	0.000695462	0.000972237
1554076_s_at	TMEM136	transmembrane protein 136	219902	-1.66097	-1.47249	-1.38756	-1.51422	-1.71673	-1.37353	-1.27487	7.50253	19.1275	1.99731e-08	4.82057e-08
1554077_a_at	TMEM53	transmembrane protein 53	79639	-1.30017	-1.13897	-1.25851	-1.45017	-1.41353	-1.37995	-1.34043	7.61514	10.6737	4.4995e-06	7.91511e-06
1554078_s_at	DNAJA3	DnaJ (Hsp40) homolog, subfamily A, member 3	9093	1.12394	-1.08664	-1.11444	-1.08774	-1.13128	-1.24839	-1.28452	8.9034	12.2226	1.37148e-06	2.57056e-06
1554080_at	RQCD1	RCD1 required for cell differentiation1 homolog (S. pombe)	9125	-1.44513	-1.62709	-1.61514	-1.54721	-1.50772	-1.75765	-1.2252	7.57787	25.529	1.06475e-09	3.16085e-09
1554082_a_at	NOL9	nucleolar protein 9	79707	1.0621	-1.08403	-1.02061	-1.0824	1.01459	-1.20517	-1.22557	7.30834	6.293	0.000283052	0.000411494
1554084_a_at	NOL9	nucleolar protein 9	79707	1.18227	1.04393	1.02892	1.01008	1.01144	-1.13405	-1.15418	7.56762	6.23137	0.000303284	0.000439527
1554085_at	DDX51	DEAD (Asp-Glu-Ala-Asp) box polypeptide 51	317781	1.65796	1.05354	1.12291	1.14196	1.0478	1.04674	-1.05127	6.41446	8.46495	3.0655e-05	4.91963e-05
1554093_a_at	SNAPC5	small nuclear RNA activating complex, polypeptide 5, 19kDa	10302	-1.32227	-1.3006	-1.2936	-1.25572	-1.48603	-1.59229	-1.4319	8.59413	14.8004	2.37374e-07	4.89764e-07
1554099_a_at	SPIN3	spindlin family, member 3	169981	1.08181	1.21879	1.10919	-1.03003	-1.00018	1.09297	1.07956	7.02542	6.63592	0.000194033	0.000286417
1554105_at	TMEM185A	transmembrane protein 185A	84548	1.08353	1.15094	1.19504	1.5882	1.13607	1.26752	-1.00423	6.30789	14.6995	2.53099e-07	5.20181e-07
1554149_at	CLDND1	claudin domain containing 1	56650	-1.5212	-1.29887	-1.26193	-1.05477	-1.20912	-1.30839	-1.08301	9.46452	8.14942	4.13712e-05	6.55263e-05
1554153_a_at	PHF21A	PHD finger protein 21A	51317	1.1344	1.15103	1.19161	1.23379	1.40747	1.41611	1.29645	7.0109	6.11232	0.000346918	0.000499941
1554154_at	GDAP2	ganglioside induced differentiation associated protein 2	54834	1.00837	1.22307	1.24665	1.33834	1.30909	1.22521	1.43352	6.98007	9.76732	9.54511e-06	1.61837e-05
1554155_at	MCPH1	microcephalin 1	79648	-1.53059	-1.42996	-1.49077	-1.80946	-2.03794	-2.52349	-2.17013	6.63141	70.3869	1.54725e-14	1.21876e-13
1554167_a_at	GOLGA7	golgi autoantigen, golgin subfamily a, 7	51125	-1.34864	-1.23223	-1.17031	-1.09673	-1.03776	-1.2628	-1.04629	8.64645	6.54056	0.000215279	0.000316301
1554168_a_at	SH3KBP1	SH3-domain kinase binding protein 1	30011	1.00363	-1.24365	-1.2348	-1.46066	-1.50465	-1.98259	-1.69629	7.84196	32.4141	8.55659e-11	3.09155e-10
1554177_a_at	ATP5S	ATP synthase, H+ transporting, mitochondrial F0 complex, subunit s (factor B)	27109	-1.29023	-1.56998	-1.88901	-1.48306	-1.67391	-1.51056	-1.86645	7.15828	22.4289	4.03375e-09	1.08765e-08
1554178_a_at	FAM126B	family with sequence similarity 126, member B	285172	1.03688	1.36447	1.36044	1.57669	1.85828	1.05945	1.78651	7.03683	12.4709	1.14518e-06	2.16693e-06
1554201_at	CABP4	calcium binding protein 4	57010	-1.16057	-1.0307	-1.18111	-1.36545	-1.21177	-1.04559	-1.21007	7.81131	5.55384	0.000664229	0.000930793
1554206_at	TMLHE	trimethyllysine hydroxylase, epsilon	55217	-1.4584	-1.39751	-1.38947	-1.50635	-1.56275	-1.44524	-1.57968	6.17684	12.0558	1.55028e-06	2.889e-06
1554213_at	ARHGEF10	Rho guanine nucleotide exchange factor (GEF) 10	9639	1.19881	1.51467	1.54187	1.23348	1.22539	1.10803	-1.08429	7.19052	25.0201	1.31208e-09	3.84491e-09
1554239_s_at	ZADH2	zinc binding alcohol dehydrogenase domain containing 2	284273	1.02795	1.2272	1.51574	1.94687	1.66543	1.78249	1.63829	7.13017	42.5158	4.47625e-12	2.05914e-11
1554242_a_at	COCH	coagulation factor C homolog, cochlin (Limulus polyphemus)	1690	1.02928	1.08704	-1.40163	-2.09058	-2.22583	-2.83744	-3.00935	6.53047	71.435	1.30661e-14	1.0467e-13
1554249_a_at	ZNF638	zinc finger protein 638	27332	-1.04821	1.3759	1.41475	1.02619	1.12811	-1.47704	-1.3753	6.70814	17.0365	6.20626e-08	1.39289e-07
1554251_at	HP1BP3	heterochromatin protein 1, binding protein 3	50809	1.26092	1.5592	1.67543	1.79083	2.42559	1.53825	1.85163	8.08604	50.8975	6.06506e-13	3.36053e-12
1554253_a_at	LASS3	LAG1 homolog, ceramide synthase 3	204219	-1.24062	-1.18601	-1.20821	-1.44087	-1.47083	-1.17031	-1.13778	6.46464	7.7023	6.40685e-05	9.94767e-05
1554256_a_at	PCNXL2	pecanex-like 2 (Drosophila)	80003	-1.37546	-2.22111	-2.30789	-2.42497	-2.71233	-2.54309	-2.89829	6.03298	59.5638	1.03358e-13	6.80073e-13
1554258_a_at	DNAJC5B	DnaJ (Hsp40) homolog, subfamily C, member 5 beta	85479	1.02502	1.13807	-1.00716	-1.13831	-1.04187	1.17859	1.04296	7.52422	6.08559	0.000357614	0.000514782
1554260_a_at	FRYL	FRY-like	285527	1.26964	1.46956	1.76553	1.49899	1.8255	1.21531	1.35012	7.03311	19.1796	1.94414e-08	4.70144e-08
1554271_a_at	CENPL	centromere protein L	91687	-1.09457	-1.02497	-1.13877	-1.25542	-1.33794	-1.67395	-1.74376	7.17918	19.7732	1.43613e-08	3.54299e-08
1554314_at	C6orf141	chromosome 6 open reading frame 141	135398	2.35226	3.5389	1.90582	1.42974	1.01264	-1.3892	-1.42404	6.88865	86.2821	1.49022e-15	1.51541e-14
1554316_at	PGLS	6-phosphogluconolactonase	25796	1.16359	1.38035	1.23223	1.16756	1.2459	1.31204	1.22221	7.01013	7.45139	8.24471e-05	0.000126505
1554317_s_at	TRMT61A	tRNA methyltransferase 61 homolog A (S. cerevisiae)	115708	-1.10954	-1.15452	-1.10834	-1.32346	-1.40933	-1.26187	-1.36907	7.534	15.5475	1.49142e-07	3.16837e-07
1554335_at	CYTH4	cytohesin 4	27128	-1.02082	1.2171	1.24408	1.07255	1.10929	1.35663	1.16721	6.54464	5.68525	0.000568438	0.0008014
1554340_a_at	C1orf187	chromosome 1 open reading frame 187	374946	1.35814	1.00043	-1.24951	-1.41287	1.32466	-1.28975	1.38583	7.11687	36.0243	2.74029e-11	1.08173e-10
1554342_s_at	HELQ	helicase, POLQ-like	113510	-1.20051	-1.26581	-1.40081	-1.32178	-1.57916	-1.41198	-1.58082	7.52993	21.3214	6.74127e-09	1.75018e-08
1554345_a_at	GIN1	gypsy retrotransposon integrase 1	54826	-1.18852	-1.14053	-1.19396	-1.17629	-1.38411	-1.49174	-1.38221	6.98779	6.17698	0.000322437	0.000466242
1554351_a_at	TIPRL	TIP41, TOR signaling pathway regulator-like (S. cerevisiae)	261726	-1.40582	-1.35505	-1.39393	-1.11814	-1.46704	-1.26103	-1.37238	8.50363	9.76616	9.55455e-06	1.61976e-05
1554360_at	FCHSD2	FCH and double SH3 domains 2	9873	1.01103	1.17738	1.14553	-1.02721	1.09035	1.26179	1.36013	6.8026	10.8248	3.98647e-06	7.05379e-06
1554365_a_at	PPP2R5C	protein phosphatase 2, regulatory subunit B', gamma isoform	5527	-1.16948	-1.29114	-1.30371	-1.38228	-1.55499	-1.49862	-1.71628	8.84116	21.7379	5.54314e-09	1.45958e-08
1554382_at	LOC200261	hypothetical LOC200261	200261	-1.06216	1.01973	-1.12395	-1.27262	-1.2509	-1.04365	1.00853	7.18329	7.02803	0.000127658	0.000191947
1554390_s_at	ACTR2	ARP2 actin-related protein 2 homolog (yeast)	10097	-1.27321	-1.48273	-1.3041	-1.62748	-1.58165	-1.83697	-2.44143	6.6902	25.9656	8.92573e-10	2.68538e-09
1554408_a_at	TK1	thymidine kinase 1, soluble	7083	1.06563	-1.18816	-1.3444	-1.35336	-1.52165	-1.66513	-2.05492	8.24482	27.1226	5.66046e-10	1.75934e-09
1554411_at	CTNNB1	catenin (cadherin-associated protein), beta 1, 88kDa	1499	-1.06235	-1.03978	1.17289	1.42009	1.30604	1.10077	1.12666	8.99812	11.5723	2.22742e-06	4.06527e-06
1554414_a_at	OSGIN2	oxidative stress induced growth inhibitor family member 2	734	-1.10492	-1.57133	-1.38629	-2.12134	-2.43295	-2.2666	-2.55148	6.59344	40.026	8.68936e-12	3.76481e-11
1554423_a_at	FBXO7	F-box protein 7	25793	-1.3303	-1.2883	-1.12212	-1.01874	-1.12929	-1.24895	-1.31033	8.9143	9.70656	1.00554e-05	1.70022e-05
1554430_at	FAM165B	family with sequence similarity 165, member B	54065	-1.30706	-1.44233	-1.25793	-1.4083	-1.50829	-1.40596	-1.39961	6.84122	6.97553	0.000134914	0.000202433
1554432_x_at	FAM165B	family with sequence similarity 165, member B	54065	-1.25541	-1.33998	-1.22935	-1.39071	-1.50691	-1.44506	-1.25883	7.17497	10.5887	4.81934e-06	8.44622e-06
1554433_a_at	ZNF146	zinc finger protein 146	7705	1.06382	-1.05845	1.00959	-1.32757	-1.19433	-1.76218	-1.39676	8.09425	23.9826	2.03186e-09	5.75511e-09
1554441_a_at	WAPAL	wings apart-like homolog (Drosophila)	23063	1.22572	-1.08163	-1.08172	-1.34277	-1.28574	-2.03454	-2.10028	7.5487	57.4282	1.56154e-13	9.85696e-13
1554445_at	ZNF85	zinc finger protein 85	7639	1.00047	1.09452	1.10068	1.15998	-1.07116	-1.20544	-1.1281	7.01931	11.7917	1.88717e-06	3.47806e-06
1554447_at	LOC554203	alanyl-tRNA synthetase domain containing 1 pseudogene	554203	1.62895	1.89159	1.77648	1.4666	1.65802	-1.05899	-1.06094	8.47039	18.6491	2.56526e-08	6.0921e-08
1554450_s_at	MIER3	mesoderm induction early response 1, family member 3	166968	-1.19339	-1.06042	1.14795	1.08543	-1.17237	-1.72458	-1.43454	6.8043	19.9013	1.3466e-08	3.33447e-08
1554452_a_at	C7orf68	chromosome 7 open reading frame 68	29923	1.19766	1.05538	-1.01263	-1.09156	-1.0796	1.57298	-1.22631	9.00116	26.6397	6.83142e-10	2.09145e-09
1554456_a_at	LINS1	lines homolog 1 (Drosophila)	55180	-1.0635	1.41944	1.47694	1.74399	1.76942	1.40508	1.68207	6.83856	31.914	1.01067e-10	3.59403e-10
1554462_a_at	DNAJB9	DnaJ (Hsp40) homolog, subfamily B, member 9	4189	-1.43263	-1.01601	-1.14205	-1.06871	-1.27161	-1.41451	1.01122	7.64035	8.52457	2.89897e-05	4.66625e-05
1554464_a_at	CRTAP	cartilage associated protein	10491	-1.1068	-1.64188	-1.62887	-1.12364	-1.7108	-1.4517	-2.42513	7.22508	22.8737	3.30163e-09	9.02916e-09
1554466_a_at	C16orf13	chromosome 16 open reading frame 13	84326	-1.15064	-1.31674	-1.23166	-1.32391	-1.39957	-1.32922	-1.21372	8.1293	8.43849	3.14269e-05	5.03821e-05
1554470_s_at	ZBTB44	zinc finger and BTB domain containing 44	29068	-1.22421	-1.46303	-1.62139	-1.66067	-1.46798	-1.82207	-1.9734	6.87186	32.978	7.11112e-11	2.60487e-10
1554472_a_at	PHF20L1	PHD finger protein 20-like 1	51105	-1.17077	1.20628	1.12005	1.3837	1.66278	1.62254	2.27225	6.63177	43.3206	3.63965e-12	1.7104e-11
1554474_a_at	MOXD1	monooxygenase, DBH-like 1	26002	1.24649	1.33597	1.33104	2.45442	3.28118	2.18085	2.29501	7.2027	45.1629	2.29607e-12	1.12233e-11
1554478_a_at	HEATR3	HEAT repeat containing 3	55027	-1.31648	-1.38922	-1.63002	-1.52102	-1.63134	-2.15957	-2.06753	6.80741	23.0683	3.02767e-09	8.3309e-09
1554479_a_at	CARD8	caspase recruitment domain family, member 8	22900	1.25733	2.07663	2.18429	2.81174	3.61389	2.0198	3.48488	7.37545	84.5434	1.88505e-15	1.87213e-14
1554480_a_at	ARMC10	armadillo repeat containing 10	83787	1.21772	-1.03505	-1.13237	-1.26988	-1.23662	-1.59744	-1.64509	7.75791	27.9378	4.14779e-10	1.31793e-09
1554482_a_at	SAR1B	SAR1 homolog B (S. cerevisiae)	51128	-2.35597	-2.39723	-2.23769	-1.94474	-2.25054	-2.53968	-1.58174	7.87342	54.3584	2.89972e-13	1.73056e-12
1554485_s_at	TMEM37	transmembrane protein 37	140738	-1.17268	-1.21761	-1.10088	-1.00539	-1.32887	1.03365	-1.01168	6.42807	6.61902	0.000197628	0.000291441
1554489_a_at	CEP70	centrosomal protein 70kDa	80321	-1.26114	1.03779	1.11192	-1.0901	-1.22145	-1.40905	-1.41011	6.63544	14.835	2.32229e-07	4.80218e-07
1554510_s_at	GHITM	growth hormone inducible transmembrane protein	27069	-1.55241	-1.64297	-1.58065	-1.58303	-1.76343	-1.9846	-1.92033	9.4317	15.3527	1.68072e-07	3.5439e-07
1554524_a_at	OLFM3	olfactomedin 3	118427	1.15113	2.72908	1.54691	-1.0061	-1.39205	-1.03731	1.11253	5.91883	83.6553	2.12929e-15	2.08043e-14
1554528_at	C3orf15	chromosome 3 open reading frame 15	89876	1.16925	1.51756	1.64773	1.61877	1.51992	1.53843	1.39063	6.63688	17.4489	4.9207e-08	1.12244e-07
1554539_a_at	RHOF	ras homolog gene family, member F (in filopodia)	54509	-1.32614	-1.47858	-1.44822	-1.5965	-1.75185	-1.34968	-1.41824	6.45454	13.3195	6.30485e-07	1.23139e-06
1554547_at	FAM13C	family with sequence similarity 13, member C	220965	-1.26594	1.40067	1.29088	2.20938	2.92223	3.52397	8.24259	5.63728	213.43	3.60482e-20	1.32968e-18
1554553_s_at	YIF1B	Yip1 interacting factor homolog B (S. cerevisiae)	90522	-1.1699	-1.21326	-1.40709	-1.33467	-1.36793	-1.27225	-1.29372	6.34782	8.53458	2.87199e-05	4.62483e-05
1554555_a_at	SETD6	SET domain containing 6	79918	1.50164	1.09231	1.02522	-1.10803	-1.17975	-1.49571	-1.6497	7.77987	47.8748	1.20129e-12	6.21027e-12
1554556_a_at	ATP11B	ATPase, class VI, type 11B	23200	-1.10963	-1.14269	-1.23065	-1.24157	-1.3981	-1.28138	-1.12824	6.4872	5.50495	0.000704184	0.0009839
1554559_at	GPR62	G protein-coupled receptor 62	118442	-1.01447	-1.01441	1.0634	-1.19038	-1.0651	1.0603	1.00944	7.90233	5.59117	0.000635367	0.000891976
1554572_a_at	SUV39H2	suppressor of variegation 3-9 homolog 2 (Drosophila)	79723	-1.08506	-1.03805	-1.25131	-1.38815	-1.37704	-1.97057	-1.55962	8.65968	26.123	8.38108e-10	2.53268e-09
1554576_a_at	ETV4	ets variant 4	2118	-1.18752	-1.52667	-1.52287	-1.76296	-1.9077	-1.4525	-1.83532	6.19236	24.0702	1.95693e-09	5.55867e-09
1554577_a_at	PSMD10	proteasome (prosome, macropain) 26S subunit, non-ATPase, 10	5716	-1.34727	-1.13367	-1.13503	-1.1961	-1.298	-1.32417	-1.1935	9.97124	9.38771	1.32636e-05	2.21424e-05
1554580_a_at	WWP2	WW domain containing E3 ubiquitin protein ligase 2	11060	1.07496	1.3055	1.26984	1.07642	1.18474	1.27614	1.31248	6.67993	6.26441	0.000292253	0.000424347
1554583_a_at	C12orf72	chromosome 12 open reading frame 72	254013	-1.0491	1.19854	1.04166	-1.19464	-1.0342	1.11474	1.01035	7.45789	6.9731	0.00013526	0.000202929
1554593_s_at	SLC1A6	solute carrier family 1 (high affinity aspartate/glutamate transporter), member 6	6511	1.20051	-1.33022	-1.2902	-1.31095	-1.12237	-1.28701	-1.15148	7.37543	16.9644	6.46629e-08	1.44737e-07
1554595_at	SYMPK	symplekin	8189	1.30505	1.21951	1.2308	1.21411	1.33974	1.16755	1.01485	7.93406	9.37441	1.34195e-05	2.23926e-05
1554597_at	---	---	---	1.70366	1.41728	1.49362	1.57182	1.8718	1.50994	1.28327	7.93999	34.6163	4.21874e-11	1.61114e-10
1554599_x_at	---	---	---	1.68548	1.3984	1.50672	1.65781	1.9269	1.40481	1.38208	7.93194	22.8311	3.36512e-09	9.19021e-09
1554600_s_at	LMNA	lamin A/C	4000	-1.59124	-1.74619	-1.69478	-1.58033	-1.63971	-1.43139	-1.54892	6.76416	22.5009	3.90427e-09	1.05493e-08
1554609_at	---	---	374408	-1.03574	1.04968	1.14405	1.15339	1.12824	1.15038	1.46293	6.2354	10.6155	4.71596e-06	8.27399e-06
1554614_a_at	PTBP2	polypyrimidine tract binding protein 2	58155	1.50085	1.31535	1.84252	1.54233	2.0688	1.55681	1.80048	6.29096	11.7366	1.96693e-06	3.61503e-06
1554627_a_at	ASCC1	activating signal cointegrator 1 complex subunit 1	51008	-1.27574	-1.35665	-1.34425	-1.42867	-1.53158	-1.46953	-1.44315	8.43659	14.3028	3.26768e-07	6.6183e-07
1554628_at	ZNF57	zinc finger protein 57	126295	-1.36502	-1.6622	-2.08249	-2.43668	-2.64929	-3.1375	-3.12309	6.53277	101.885	2.16961e-16	2.71789e-15
1554636_at	---	---	---	2.37743	2.73029	2.59549	5.9184	8.12748	4.83578	7.33598	6.15135	66.2121	3.1087e-14	2.29011e-13
1554667_s_at	METTL8	methyltransferase like 8	79828	-1.32511	-1.87079	-2.23811	-2.94905	-3.13992	-4.52274	-5.23637	7.87183	137.296	6.62612e-18	1.26806e-16
1554678_s_at	HNRPDL	heterogeneous nuclear ribonucleoprotein D-like	9987	1.50002	1.00741	1.15332	1.37958	1.49299	1.47629	-1.00347	10.7208	12.1148	1.48428e-06	2.77278e-06
1554679_a_at	LAPTM4B	lysosomal protein transmembrane 4 beta	55353	1.19763	-1.13404	-1.06793	-1.31947	-1.37485	-1.26082	-1.98755	10.2242	34.5837	4.26178e-11	1.62637e-10
1554680_s_at	KCNS2	potassium voltage-gated channel, delayed-rectifier, subfamily S, member 2	3788	-1.00753	1.03855	-1.0457	-1.24754	-1.03413	1.01402	1.06468	7.37982	7.14019	0.000113531	0.00017151
1554689_a_at	NLGN4X	neuroligin 4, X-linked	57502	-1.06032	-1.85072	-2.01024	-2.09947	-2.20779	-1.9396	-2.10634	6.92558	50.883	6.0845e-13	3.36964e-12
1554696_s_at	TYMS	thymidylate synthetase	7298	-1.26376	-1.19662	-1.15772	-1.0431	1.06678	-1.19018	-1.4116	9.55777	10.2764	6.2218e-06	1.07846e-05
1554701_a_at	TBC1D16	TBC1 domain family, member 16	125058	1.04454	-1.19429	-1.29998	-1.2994	-1.27848	-1.13802	-1.19469	7.07697	6.34728	0.000266435	0.000388186
1554703_at	ARHGEF10	Rho guanine nucleotide exchange factor (GEF) 10	9639	1.8987	2.11367	1.91924	1.76847	1.72344	1.11132	-1.30761	6.97348	95.3254	4.7003e-16	5.38592e-15
1554747_a_at	40788	septin 2	4735	1.01958	-1.04519	-1.06213	-1.14151	-1.3387	-1.54493	-2.06108	9.0252	49.075	9.11563e-13	4.83587e-12
1554762_a_at	WWC2	WW and C2 domain containing 2	80014	-1.07622	-1.23043	-1.27491	-1.30696	-1.39414	-1.51484	-1.5611	7.7883	20.1342	1.19888e-08	2.99496e-08
1554767_s_at	CRYZL1	crystallin, zeta (quinone reductase)-like 1	9946	-1.42999	-1.26854	-1.20556	1.11564	-1.00713	1.06231	1.10772	6.54096	22.8922	3.27442e-09	8.96136e-09
1554768_a_at	MAD2L1	MAD2 mitotic arrest deficient-like 1 (yeast)	4085	-1.39758	-1.26685	-1.31683	-1.45174	-1.53852	-1.77367	-1.84905	10.1904	34.3721	4.55369e-11	1.7271e-10
1554769_at	ZNF785	zinc finger protein 785	146540	2.17317	3.25591	3.14095	5.11282	5.98257	3.48658	5.02508	6.52469	114.528	5.547e-17	8.3048e-16
1554770_x_at	ZNF785	zinc finger protein 785	146540	2.17574	3.13961	3.29152	5.04071	5.86717	3.51112	5.1441	6.03172	116.203	4.68166e-17	7.1286e-16
1554776_at	ZFP42	zinc finger protein 42 homolog (mouse)	132625	-1.60028	-1.95052	-2.3349	-3.94864	-4.83869	-7.27234	-8.63745	7.13924	153.523	1.77914e-18	3.99437e-17
1554777_at	ZFP42	zinc finger protein 42 homolog (mouse)	132625	-1.15182	-1.50902	-1.98992	-3.62737	-5.55895	-6.886	-13.9879	7.13364	148.068	2.72484e-18	5.80561e-17
1554780_a_at	PHTF2	putative homeodomain transcription factor 2	57157	-1.3694	-1.49604	-1.56456	-1.49095	-1.61408	-1.36081	-1.53078	6.13815	11.7404	1.96134e-06	3.60526e-06
1554795_a_at	FBLIM1	filamin binding LIM protein 1	54751	-1.28078	-1.79815	-1.58234	-1.90149	-1.87046	-1.75179	-1.92422	5.95175	19.7138	1.47983e-08	3.64559e-08
1554804_a_at	CLDN19	claudin 19	149461	-1.12633	-1.16167	-1.15434	-1.31917	-1.39776	-1.13901	-1.2384	7.97958	5.72986	0.000539389	0.000762104
1554806_a_at	FBXO8	F-box protein 8	26269	-1.98724	-1.41405	-1.20592	1.14932	-1.04211	1.31005	1.3683	7.69024	51.2027	5.67255e-13	3.16606e-12
1554821_a_at	ZBED1	zinc finger, BED-type containing 1	9189	1.20628	-1.14137	-1.15359	-1.09028	-1.03553	-1.26041	-1.08847	7.08771	13.4011	5.96192e-07	1.16757e-06
1554827_a_at	ADCY7	adenylate cyclase 7	113	-1.125	-1.04228	-1.16174	-1.32673	-1.28619	-1.15608	-1.22759	6.95394	6.43244	0.000242441	0.000354622
1554863_s_at	DOK5	docking protein 5	55816	-1.00365	1.03974	1.31315	1.79135	1.79231	1.80122	2.25903	7.25417	49.7174	7.8838e-13	4.24667e-12
1554868_s_at	PCNP	PEST proteolytic signal containing nuclear protein	57092	-1.15421	-1.31807	-1.29662	-1.30861	-1.20808	-1.50747	-1.61185	9.59489	11.0034	3.46023e-06	6.16978e-06
1554883_a_at	ERCC8	excision repair cross-complementing rodent repair deficiency, complementation group 8	1161	-1.537	-1.56011	-1.46424	-1.66059	-1.9694	-2.16349	-2.265	6.33497	31.9343	1.00381e-10	3.57209e-10
1554887_at	---	---	---	-1.7096	-5.81444	-7.78983	-9.85647	-10.6757	-11.2729	-14.2619	5.55559	305.307	5.06661e-22	3.31774e-20
1554890_a_at	TIA1	TIA1 cytotoxic granule-associated RNA binding protein	7072	-1.0956	1.16607	1.13458	-1.03582	-1.02137	-1.36413	-1.13411	7.91071	7.05771	0.000123744	0.000186288
1554894_a_at	PCBD2	pterin-4 alpha-carbinolamine dehydratase/dimerization cofactor of hepatocyte nuclear factor 1 alpha (TCF1) 2	84105	-1.1181	-1.37649	-1.55662	-1.48272	-1.6525	-1.90064	-1.90476	6.83739	20.3545	1.07517e-08	2.70445e-08
1554903_at	FRMD8	FERM domain containing 8	83786	1.15005	1.26736	1.23052	1.13479	1.18234	1.4115	1.27166	8.22996	7.79238	5.85927e-05	9.13356e-05
1554911_at	ABCC11	ATP-binding cassette, sub-family C (CFTR/MRP), member 11	85320	-1.01419	1.03982	1.06785	-1.07611	-1.06014	1.19335	1.10746	7.42817	5.76449	0.000517943	0.000733162
1554930_a_at	FUT8	fucosyltransferase 8 (alpha (1,6) fucosyltransferase)	2530	-1.13569	1.24088	1.23597	-1.11273	-1.08193	-1.21674	-1.04926	7.37851	14.5911	2.71249e-07	5.55063e-07
1554958_at	ZNF641	zinc finger protein 641	121274	-1.17202	1.04146	1.13266	1.3936	1.14689	1.08452	1.07712	6.27545	10.4886	5.22737e-06	9.13047e-06
1554966_a_at	FILIP1L	filamin A interacting protein 1-like	11259	1.04905	1.08546	1.31585	1.74944	1.8958	2.06518	2.49061	6.04942	31.7627	1.06338e-10	3.76649e-10
1555037_a_at	IDH1	isocitrate dehydrogenase 1 (NADP+), soluble	3417	-1.32466	-1.53419	-1.53799	-1.2357	-1.41707	-1.32072	-1.33432	11.455	14.9068	2.21925e-07	4.60011e-07
1555058_a_at	LPGAT1	lysophosphatidylglycerol acyltransferase 1	9926	-1.12395	1.05872	1.36151	1.52969	1.4905	1.11026	1.17229	6.72483	14.0112	3.95647e-07	7.93466e-07
1555096_at	C4orf37	chromosome 4 open reading frame 37	285555	-1.1189	1.14474	1.05318	-1.20043	-1.04518	1.11272	1.04926	6.5262	7.26011	0.000100268	0.000152291
1555112_a_at	C1orf114	chromosome 1 open reading frame 114	57821	1.11232	1.54207	1.51801	1.48551	1.49957	1.28934	1.98781	7.37068	31.4694	1.17421e-10	4.12916e-10
1555167_s_at	NAMPT	nicotinamide phosphoribosyltransferase	10135	1.02476	-1.18096	-1.13711	-1.35292	-1.54454	-1.50505	-1.66181	6.0088	11.7478	1.95044e-06	3.58676e-06
1555193_a_at	ZNF277	zinc finger protein 277	11179	-1.26459	-1.13789	-1.50253	-1.08822	-1.39427	-1.24234	-1.24378	6.40263	6.40702	0.00024935	0.000364338
1555201_a_at	RMND1	required for meiotic nuclear division 1 homolog (S. cerevisiae)	55005	1.25887	1.29766	1.25932	1.25439	1.11604	-1.02949	-1.03823	7.09802	8.8487	2.14895e-05	3.50754e-05
1555202_a_at	RPRD1A	regulation of nuclear pre-mRNA domain containing 1A	55197	-1.38389	-1.50059	-1.44945	-1.58574	-1.7758	-1.93833	-2.15866	6.39088	22.9789	3.15037e-09	8.64195e-09
1555216_a_at	LOC645722	hypothetical LOC645722	645722	-1.09288	1.13412	1.21978	1.39468	1.3207	1.78161	1.7398	6.56229	26.6499	6.80394e-10	2.08377e-09
1555225_at	C1orf43	chromosome 1 open reading frame 43	25912	1.25619	-1.38193	-1.58235	-1.87129	-2.00498	-2.83782	-2.9479	7.13787	124.593	2.07035e-17	3.43262e-16
1555231_a_at	C21orf88	chromosome 21 open reading frame 88	114041	-1.22451	-2.03186	-2.13776	-2.30742	-2.47487	-2.25826	-2.48916	5.69781	44.4836	2.7157e-12	1.30481e-11
1555240_s_at	GNG12	guanine nucleotide binding protein (G protein), gamma 12	55970	-2.02375	-2.02522	-1.75245	-1.47672	-1.69293	-1.5741	-1.67406	7.16533	22.6275	3.68722e-09	1.00056e-08
1555241_at	C8orf59	chromosome 8 open reading frame 59	401466	-1.68675	-2.19594	-2.65603	-2.29567	-2.9415	-2.26515	-3.5353	7.69435	77.2196	5.35113e-15	4.68784e-14
1555243_x_at	C8orf59	chromosome 8 open reading frame 59	401466	-1.34146	-1.32113	-1.46304	-1.38901	-1.75699	-1.49617	-1.87547	7.48324	13.7008	4.86583e-07	9.63689e-07
1555247_a_at	RAPGEF6	Rap guanine nucleotide exchange factor (GEF) 6	51735	1.20181	1.23996	1.52823	2.35835	2.10042	1.61878	2.46292	7.01836	58.9979	1.15143e-13	7.50008e-13
1555259_at	ZAK	sterile alpha motif and leucine zipper containing kinase AZK	51776	1.25927	1.45067	1.33343	1.45334	1.59653	1.52053	1.21278	6.74285	8.18705	3.99029e-05	6.3305e-05
1555267_at	GRID1	glutamate receptor, ionotropic, delta 1	2894	1.07568	1.06287	-1.06302	-1.33283	-1.02163	1.08145	1.00039	6.83408	6.35949	0.000262842	0.000383145
1555272_at	RSPH10B2	radial spoke head 10 homolog B2 (Chlamydomonas)	728194	-1.32516	-1.51343	-1.73669	-1.73709	-1.86775	-1.88546	-1.82152	7.68375	17.2313	5.55863e-08	1.25777e-07
1555274_a_at	SELI	selenoprotein I	85465	-1.27326	-1.50241	-1.50102	-2.09618	-2.35998	-2.704	-2.57606	7.43864	79.2068	3.99562e-15	3.61516e-14
1555279_at	ARMC8	armadillo repeat containing 8	25852	-1.53374	-2.46522	-2.29553	-2.33809	-2.37522	-1.88075	-2.18459	5.92266	33.9695	5.17054e-11	1.94146e-10
1555281_x_at	ARMC8	armadillo repeat containing 8	25852	-1.65392	-2.58912	-2.37429	-2.46754	-2.76375	-1.9142	-2.03604	6.16547	33.0146	7.02678e-11	2.57506e-10
1555351_s_at	PPHLN1	periphilin 1	51535	-1.03713	-1.16806	-1.14551	-1.53616	-1.50074	-1.56332	-1.50339	6.67748	10.9786	3.52848e-06	6.2837e-06
1555370_a_at	CAMTA1	calmodulin binding transcription activator 1	23261	1.01522	1.73306	1.90878	2.54745	3.54636	2.93258	5.28607	7.8919	190.162	1.41763e-19	4.27449e-18
1555372_at	BCL2L11	BCL2-like 11 (apoptosis facilitator)	10018	1.61196	2.11787	1.9615	1.60659	1.7933	1.41136	1.56236	7.04961	22.345	4.19074e-09	1.12647e-08
1555384_a_at	LARP4	La ribonucleoprotein domain family, member 4	113251	-1.09732	-1.12929	-1.10495	-1.25985	-1.43915	-1.51655	-1.38664	6.87674	9.5463	1.15481e-05	1.93959e-05
1555393_s_at	C21orf67	chromosome 21 open reading frame 67	84536	1.09599	1.21294	1.1069	1.03311	1.16726	1.37078	1.14752	7.41709	7.00785	0.000130396	0.000195836
1555411_a_at	CCNL1	cyclin L1	57018	1.20767	1.28309	1.35618	1.35151	1.32858	1.03797	1.00884	8.35162	9.21142	1.54994e-05	2.57061e-05
1555419_a_at	ASAH1	N-acylsphingosine amidohydrolase (acid ceramidase) 1	427	-1.59542	-1.55629	-1.42067	-1.24322	-1.39674	-1.35208	-1.08358	7.7215	15.1998	1.84748e-07	3.86784e-07
1555420_a_at	KLF7	Kruppel-like factor 7 (ubiquitous)	8609	1.08073	-1.39289	-1.30762	-1.26354	-1.08187	-1.02898	-1.00241	6.76133	9.5017	1.2005e-05	2.01215e-05
1555427_s_at	SYNCRIP	synaptotagmin binding, cytoplasmic RNA interacting protein	10492	1.24346	-1.63876	-1.48916	-1.58946	-1.65255	-1.83796	-2.3654	8.43315	54.727	2.68748e-13	1.61654e-12
1555446_s_at	TRAPPC10	trafficking protein particle complex 10	7109	1.1437	1.56267	1.52029	1.33304	1.56402	-1.03241	1.19141	7.34903	25.9327	9.04429e-10	2.71758e-09
1555460_a_at	SLC39A6	solute carrier family 39 (zinc transporter), member 6	25800	-1.07861	1.04219	1.16523	1.40465	1.52014	1.35547	1.80748	7.23737	23.7004	2.29484e-09	6.4404e-09
1555461_at	---	---	---	1.6696	1.01946	1.02681	1.45068	1.53797	1.07311	1.32758	6.78546	13.81	4.52264e-07	8.99704e-07
1555467_a_at	CUGBP1	CUG triplet repeat, RNA binding protein 1	10658	1.19842	-1.0361	-1.01653	-1.11857	-1.19658	-1.25311	-1.30336	7.1208	10.8376	3.946e-06	6.98577e-06
1555469_a_at	CLASP2	cytoplasmic linker associated protein 2	23122	1.00054	1.1408	1.23434	1.08047	1.22397	1.37515	1.3959	7.5196	13.3129	6.33323e-07	1.23665e-06
1555486_a_at	FLJ14213	protor-2	79899	-1.26065	-1.18343	-1.33286	-1.43353	-1.35596	-1.3467	-1.4224	6.88935	8.07691	4.43666e-05	7.00396e-05
1555487_a_at	ACTR3B /// LOC100133409	ARP3 actin-related protein 3 homolog B (yeast) /// similar to actin-related protein 3-beta	100133409 /// 57180	-1.02935	-1.04289	-1.11713	-1.39708	-1.30334	-1.30966	-1.45867	7.45584	19.257	1.86808e-08	4.52848e-08
1555495_a_at	SDCCAG10	serologically defined colon cancer antigen 10	10283	1.20119	1.18267	1.20255	-1.00337	1.00684	-1.14896	-1.22564	9.95769	13.9519	4.11494e-07	8.23083e-07
1555501_s_at	RSRC1	arginine/serine-rich coiled-coil 1	51319	-1.14373	1.05694	1.08261	-1.01968	-1.10868	-1.25914	-1.34649	7.66844	10.4074	5.58593e-06	9.72335e-06
1555514_a_at	PIAS2	protein inhibitor of activated STAT, 2	9063	-1.0512	-1.34969	-1.29664	-1.51025	-1.38055	-1.2688	-1.57901	6.35598	7.62126	6.94677e-05	0.000107538
1555522_s_at	MEMO1	mediator of cell motility 1	51072	-1.15251	-1.32015	-1.34633	-1.4935	-1.4466	-1.84449	-1.85993	8.39307	41.6284	5.6467e-12	2.54342e-11
1555526_a_at	40792	septin 6	23157	1.17479	1.0787	-1.01792	1.40469	1.98278	1.32764	1.80407	6.1975	13.4995	5.57508e-07	1.0962e-06
1555543_a_at	CLCC1	chloride channel CLIC-like 1	23155	-1.18028	-1.29793	-1.31798	-1.4203	-1.52214	-1.68866	-1.79504	6.96269	20.3937	1.05463e-08	2.65589e-08
1555575_a_at	KDELR1	KDEL (Lys-Asp-Glu-Leu) endoplasmic reticulum protein retention receptor 1	10945	1.23997	-1.04394	-1.05705	1.26513	1.21934	1.51991	1.22062	10.5894	33.4821	6.04108e-11	2.24234e-10
1555579_s_at	PTPRM	protein tyrosine phosphatase, receptor type, M	5797	-1.90943	-1.77673	-1.28178	1.1436	1.23874	1.49332	1.76559	8.0364	84.0966	2.00389e-15	1.97053e-14
1555606_a_at	GDPD1	glycerophosphodiester phosphodiesterase domain containing 1	284161	1.09133	1.29041	1.17835	1.30222	1.20066	1.36982	1.60943	6.41173	8.12929	4.21803e-05	6.67507e-05
1555616_at	---	---	---	1.1712	1.19893	-1.03856	-1.23196	-1.10064	-1.01919	-1.12918	7.10859	7.83662	5.60903e-05	8.76509e-05
1555618_s_at	SAE1	SUMO1 activating enzyme subunit 1	10055	1.19454	-1.07912	-1.11302	-1.07658	-1.08367	-1.3537	-1.60479	8.90525	19.0768	2.05045e-08	4.9401e-08
1555620_a_at	PTGIR	prostaglandin I2 (prostacyclin) receptor (IP)	5739	-1.09218	-1.14026	-1.10398	-1.24742	-1.28389	-1.1414	-1.22342	8.63298	6.50947	0.000222737	0.000326943
1555628_a_at	HAVCR2	hepatitis A virus cellular receptor 2	84868	-1.38527	-1.41118	-1.44055	-1.51404	-1.76638	-1.47384	-1.5671	6.92071	14.0636	3.82194e-07	7.67733e-07
1555630_a_at	RAB34	RAB34, member RAS oncogene family	83871	-1.23767	-2.23045	-2.32495	-1.97088	-2.31815	-1.91056	-3.08696	9.58674	91.7089	7.35936e-16	8.07257e-15
1555650_at	KLHL17	kelch-like 17 (Drosophila)	339451	-1.21224	-1.26641	-1.25959	-1.50227	-1.36453	-1.28679	-1.2436	7.22936	5.79127	0.000501986	0.000711506
1555653_at	HNRNPA3	heterogeneous nuclear ribonucleoprotein A3	220988	1.61581	1.0084	1.11813	1.43958	1.50663	1.36324	1.47331	11.3159	20.024	1.26646e-08	3.15139e-08
1555679_a_at	RTN4IP1	reticulon 4 interacting protein 1	84816	-1.27182	-2.35634	-2.57761	-2.67405	-3.01347	-3.38517	-3.23549	7.20599	86.0935	1.52836e-15	1.55055e-14
1555707_at	TNAP	TRAFs and NIK-associated protein	445341	-1.00104	1.146	1.16904	1.1901	1.34372	1.2764	1.48632	6.24956	9.16155	1.62035e-05	2.68206e-05
1555724_s_at	TAGLN	transgelin	6876	-4.55348	-8.45297	-8.68417	-8.2496	-6.95324	-7.89164	-10.4401	8.7334	320.048	2.88423e-22	2.04907e-20
1555725_a_at	RGS5	regulator of G-protein signaling 5	8490	-5.36765	-2.45991	-1.71924	1.12543	-1.94507	-2.08959	-7.02244	8.03706	217.979	2.80587e-20	1.07791e-18
1555730_a_at	CFL1	cofilin 1 (non-muscle)	1072	1.04869	-1.19442	-1.18851	-1.03912	-1.05962	-1.29052	-1.39724	9.2605	8.24066	3.79077e-05	6.02652e-05
1555736_a_at	AGTRAP	angiotensin II receptor-associated protein	57085	1.19996	-1.08545	-1.21218	-1.35876	-1.54726	-1.3925	-2.03027	7.91187	31.0265	1.36593e-10	4.74735e-10
1555742_at	---	---	---	1.58033	-1.0848	-1.22521	-1.57854	-1.3569	-1.0797	-1.52092	7.50579	12.9217	8.31053e-07	1.59819e-06
1555743_s_at	---	---	---	-1.16496	-1.33695	-1.42678	-1.63417	-1.50448	-1.4379	-1.54578	9.28272	20.0221	1.26762e-08	3.15365e-08
1555751_a_at	GEMIN7	gem (nuclear organelle) associated protein 7	79760	1.06664	-1.22562	-1.30654	-1.23641	-1.32772	-1.17255	-1.27657	8.18255	16.4801	8.54929e-08	1.8797e-07
1555758_a_at	CDKN3	cyclin-dependent kinase inhibitor 3	1033	-1.54583	-1.4734	-1.35568	-1.74422	-1.88011	-2.18281	-2.12671	9.4934	45.3541	2.19106e-12	1.07546e-11
1555760_a_at	RBM15	RNA binding motif protein 15	64783	1.48246	1.12851	1.19329	1.08348	1.13898	-1.05062	-1.10146	8.67767	27.3243	5.23752e-10	1.63829e-09
1555762_s_at	RBM15	RNA binding motif protein 15	64783	1.44156	1.19804	1.03801	1.14328	1.13585	-1.29182	-1.46541	7.98782	33.0537	6.93821e-11	2.54476e-10
1555764_s_at	TIMM10	translocase of inner mitochondrial membrane 10 homolog (yeast)	26519	-1.44176	-1.59574	-1.68083	-1.86757	-2.04694	-2.29222	-2.42921	10.2718	33.2176	6.57896e-11	2.42294e-10
1555765_a_at	GNG4	guanine nucleotide binding protein (G protein), gamma 4	2786	-1.14103	-1.92788	-1.8783	-1.82528	-1.53299	-1.72374	-1.57447	7.91357	36.4125	2.43943e-11	9.71837e-11
1555772_a_at	CDC25A	cell division cycle 25 homolog A (S. pombe)	993	1.28545	-1.22724	-1.64262	-1.69367	-1.75473	-3.90811	-3.5172	6.36689	101.581	2.24623e-16	2.80439e-15
1555778_a_at	POSTN	periostin, osteoblast specific factor	10631	-1.06275	3.56814	20.9809	84.0167	40.471	57.3674	27.5662	8.79789	739.874	1.23651e-26	4.39232e-24
1555780_a_at	RHEB	Ras homolog enriched in brain	6009	-1.05451	-1.61489	-1.62846	-1.58946	-1.51939	-1.61596	-1.67294	10.1127	18.3229	3.05157e-08	7.1611e-08
1555786_s_at	C14orf34	chromosome 14 open reading frame 34	645687	-1.05964	1.00683	-1.04478	-1.2723	-1.1525	1.1226	-1.03421	7.46546	6.20459	0.000312558	0.000452437
1555789_s_at	PHF23	PHD finger protein 23	79142	1.02318	-1.11468	-1.10194	-1.06865	-1.16595	-1.2989	-1.42759	8.04051	17.3794	5.11538e-08	1.16398e-07
1555793_a_at	ZFP82	zinc finger protein 82 homolog (mouse)	284406	-1.10804	1.00889	-1.02954	-1.08587	-1.18189	-1.38467	-1.05948	7.43749	7.77072	5.98618e-05	9.32242e-05
1555797_a_at	ARPC5	actin related protein 2/3 complex, subunit 5, 16kDa	10092	-1.54406	-1.34013	-1.43485	-1.26836	-1.39742	-1.79387	-1.58696	8.00135	8.44077	3.13596e-05	5.02774e-05
1555814_a_at	RHOA	ras homolog gene family, member A	387	1.11636	1.0177	1.00857	1.12993	1.01262	-1.16587	-1.34792	9.89541	7.88722	5.33691e-05	8.35444e-05
1555823_at	PACS2	phosphofurin acidic cluster sorting protein 2	23241	-1.03456	1.14729	1.15516	1.02946	1.10752	1.22949	1.15833	10.7364	5.84007	0.000474251	0.000674073
1555824_a_at	PACS2	phosphofurin acidic cluster sorting protein 2	23241	1.08783	1.03117	1.0008	1.21118	1.44965	1.4851	1.5649	8.1551	10.9928	3.48927e-06	6.21901e-06
1555826_at	EPR1	effector cell peptidase receptor 1 (non-protein coding)	8475	1.015	-1.19349	-1.18509	-1.27273	-1.34697	-1.28824	-1.47208	7.18538	8.80728	2.23188e-05	3.63672e-05
1555831_s_at	LRRC41	leucine rich repeat containing 41	10489	-1.02284	-1.04521	1.14413	1.2674	1.20136	1.19192	1.13009	7.96054	7.99528	4.8022e-05	7.55069e-05
1555832_s_at	KLF6	Kruppel-like factor 6	1316	1.41899	1.4729	1.50275	1.69894	1.67673	1.61314	1.46322	8.89396	14.0472	3.86349e-07	7.75539e-07
1555833_a_at	IRGQ	immunity-related GTPase family, Q	126298	1.46953	1.12921	1.25395	1.27882	1.62786	1.39156	1.45557	8.60826	25.2767	1.18039e-09	3.48141e-09
1555834_at	UCHL1	Ubiquitin carboxyl-terminal esterase L1 (ubiquitin thiolesterase)	7345	1.37826	1.26386	1.24989	-1.16736	1.04061	1.02243	1.12948	6.78923	7.08055	0.000120821	0.000182152
1555841_at	C9orf30	Chromosome 9 open reading frame 30	91283	-1.45192	-1.56781	-1.68179	-1.66663	-1.51398	-1.7219	-1.50333	8.64437	21.5027	6.18841e-09	1.61749e-08
1555842_at	CYTH2	cytohesin 2	9266	1.61372	1.76867	1.82768	1.93852	2.32076	1.75481	1.89645	7.04315	30.2194	1.80835e-10	6.14257e-10
1555843_at	HNRNPM	Heterogeneous nuclear ribonucleoprotein M	4670	1.13066	1.24899	1.20509	1.06087	1.26664	1.49857	1.28316	7.33203	13.4301	5.84526e-07	1.14594e-06
1555844_s_at	HNRNPM	heterogeneous nuclear ribonucleoprotein M	4670	1.85455	1.13718	1.28284	1.30504	1.56839	1.18069	-1.05187	11.1638	45.2755	2.23358e-12	1.09487e-11
1555845_at	---	---	---	1.35187	1.35589	1.1677	1.11262	1.1546	-1.651	-1.25332	8.9444	52.329	4.44536e-13	2.53849e-12
1555846_a_at	---	---	---	1.21663	1.20115	1.28934	1.01607	1.042	-1.38265	-1.20183	7.94283	17.7398	4.1884e-08	9.63192e-08
1555848_at	---	---	---	1.07948	1.10922	1.07834	1.06602	1.35668	1.26924	1.50778	6.50566	10.7154	4.35106e-06	7.66699e-06
1555851_s_at	SEPW1	selenoprotein W, 1	6415	-1.31102	-1.23994	-1.36518	-1.50965	-1.65457	-1.59318	-1.62805	11.0481	34.3382	4.60249e-11	1.74382e-10
1555858_at	---	---	---	1.39818	2.05494	1.94523	1.69663	1.65444	1.46665	1.69782	6.77932	34.4688	4.41776e-11	1.67973e-10
1555860_x_at	---	---	---	1.26895	1.78742	1.66897	1.58909	1.42424	1.30337	1.45409	7.02708	23.7003	2.29491e-09	6.4404e-09
1555864_s_at	PDHA1	pyruvate dehydrogenase (lipoamide) alpha 1	5160	1.15003	-1.18518	-1.21945	-1.20752	-1.17722	-1.2679	-1.54376	9.96207	24.1723	1.87345e-09	5.34674e-09
1555866_a_at	HEXDC	hexosaminidase (glycosyl hydrolase family 20, catalytic domain) containing	284004	1.21294	1.22277	1.32722	1.28567	1.43848	1.35531	1.3006	8.59217	8.1247	4.2367e-05	6.70339e-05
1555867_at	GNG4	guanine nucleotide binding protein (G protein), gamma 4	2786	-1.18889	-1.6587	-1.22241	1.34248	2.12488	1.95828	2.82469	7.01169	146.748	3.02796e-18	6.3629e-17
1555872_a_at	LOC728903 /// MGC21881	hypothetical LOC728903 /// hypothetical locus MGC21881	389741 /// 728903	-1.01377	-1.32123	-1.41898	-1.25926	-1.19348	-1.27774	-1.27165	7.59422	11.6633	2.07888e-06	3.80998e-06
1555874_x_at	MGC21881	hypothetical locus MGC21881	389741	-1.00324	-1.3891	-1.61354	-1.38283	-1.38217	-1.49055	-1.36	7.83728	32.5129	8.28203e-11	2.99862e-10
1555878_at	RPS24	Ribosomal protein S24	6229	1.27281	-1.25131	-1.7739	-2.39282	-3.32038	-5.06646	-7.634	7.18501	146.803	3.01466e-18	6.35037e-17
1555881_s_at	LZTS2	leucine zipper, putative tumor suppressor 2	84445	1.48346	1.36501	1.24881	1.19268	1.36649	1.36608	1.12807	9.27136	7.61188	7.01239e-05	0.000108469
1555882_at	SPIN3	spindlin family, member 3	169981	2.00148	1.32275	1.43091	1.54386	1.90187	1.4221	1.76558	6.66822	25.2671	1.18506e-09	3.49321e-09
1555883_s_at	SPIN3	spindlin family, member 3	169981	1.44005	1.12221	1.1198	1.04196	1.24454	1.17101	1.33645	7.1919	12.0809	1.52184e-06	2.83925e-06
1555886_at	PDSS2	prenyl (decaprenyl) diphosphate synthase, subunit 2	57107	-1.54429	-1.6606	-1.76671	-1.60932	-1.84088	-1.47439	-1.918	6.38343	16.178	1.02098e-07	2.21716e-07
1555888_at	UBR5	Ubiquitin protein ligase E3 component n-recognin 5	51366	-1.95484	-2.33797	-2.02734	-2.23114	-2.07716	-2.11702	-2.19597	5.83231	29.0104	2.78775e-10	9.13089e-10
1555889_a_at	CRTAP	cartilage associated protein	10491	-1.06104	-1.26135	-1.27367	-1.13855	-1.34601	-1.09491	-1.74211	9.8908	34.4885	4.39063e-11	1.67087e-10
1555900_at	---	---	---	1.00421	-1.09165	1.20848	1.21708	1.39148	1.28529	1.37996	7.09558	14.084	3.77096e-07	7.58131e-07
1555906_s_at	C3orf23	chromosome 3 open reading frame 23	285343	-1.17238	-1.20666	-1.11319	1.02381	1.00063	1.10187	1.20475	7.86964	10.7461	4.2453e-06	7.4903e-06
1555910_at	PTCD2	pentatricopeptide repeat domain 2	79810	-1.4735	-1.48962	-1.49903	-1.78289	-1.90011	-2.18912	-2.2443	8.1424	63.9757	4.59603e-14	3.26754e-13
1555920_at	CBX3	Chromobox homolog 3 (HP1 gamma homolog, Drosophila)	11335	1.78951	2.40515	2.14738	2.47119	2.42095	1.5373	2.00318	8.08337	43.9863	3.07532e-12	1.46538e-11
1555923_a_at	C10orf114	chromosome 10 open reading frame 114	399726	1.45306	1.18215	-1.06049	-1.22893	-1.08726	-1.42401	-1.08596	7.37893	21.8233	5.32734e-09	1.40589e-08
1555935_s_at	HUNK	hormonally up-regulated Neu-associated kinase	30811	1.37978	1.26154	1.67325	2.08954	2.02044	1.83374	1.67893	8.59059	36.0036	2.75749e-11	1.08818e-10
1555945_s_at	FAM120A	family with sequence similarity 120A	23196	1.59257	1.28391	1.28647	1.3479	1.27858	1.0259	1.01558	8.43414	16.7841	7.16934e-08	1.59482e-07
1555948_s_at	FAM120A	family with sequence similarity 120A	23196	1.79279	1.24598	1.22263	1.37396	1.25535	-1.03541	-1.05294	7.35521	11.2995	2.74587e-06	4.95774e-06
1555950_a_at	CD55	CD55 molecule, decay accelerating factor for complement (Cromer blood group)	1604	1.98619	1.11559	-1.01129	-1.24061	-1.35919	1.02693	-1.05789	7.43902	44.4096	2.7662e-12	1.32757e-11
1555960_at	HINT1	histidine triad nucleotide binding protein 1	3094	1.35339	1.08025	-1.08369	-1.14876	-1.22539	-1.49648	-1.90534	6.22643	37.3968	1.82535e-11	7.44935e-11
1555961_a_at	HINT1	histidine triad nucleotide binding protein 1	3094	-1.41141	-1.32632	-1.32328	-1.36367	-1.46306	-1.43758	-1.35901	12.9602	23.5397	2.46089e-09	6.872e-09
1555962_at	B3GNT7	UDP-GlcNAc:betaGal beta-1,3-N-acetylglucosaminyltransferase 7	93010	2.30191	-1.09989	1.07462	-1.41828	-1.52947	-1.57263	-2.86426	6.13296	101.452	2.27965e-16	2.83959e-15
1555963_x_at	B3GNT7	UDP-GlcNAc:betaGal beta-1,3-N-acetylglucosaminyltransferase 7	93010	2.69067	1.0571	1.30245	-1.32898	-1.61962	-1.3297	-2.73271	7.09469	148.275	2.68031e-18	5.72513e-17
1555971_s_at	FBXO28	F-box protein 28	23219	1.10917	-1.33479	-1.614	-2.23754	-2.15678	-3.09739	-3.19106	9.09096	112.161	7.07976e-17	1.02276e-15
1555989_at	---	---	---	1.29764	1.39038	1.54236	1.92106	2.49107	2.08092	2.99702	8.52092	80.8876	3.13781e-15	2.92055e-14
1555990_at	C22orf42	chromosome 22 open reading frame 42	150297	-1.00603	1.01677	1.0787	-1.13168	-1.14231	1.13604	1.66456	6.37509	14.3709	3.12637e-07	6.34548e-07
1556000_s_at	BTBD7	BTB (POZ) domain containing 7	55727	1.09552	1.08238	1.14423	1.11534	1.18293	-1.10628	-1.09038	8.62835	9.50015	1.20211e-05	2.01469e-05
1556006_s_at	CSNK1A1	Casein kinase 1, alpha 1	1452	1.67533	1.69699	1.59134	1.57404	1.54199	1.1333	-1.0322	6.53646	13.0016	7.85798e-07	1.51577e-06
1556007_s_at	---	---	---	1.59264	2.3694	2.46505	2.22942	2.29255	1.39242	1.71538	8.21735	36.3111	2.51437e-11	9.99238e-11
1556009_at	PEX13	peroxisomal biogenesis factor 13	5194	-1.57057	-1.46658	-1.52688	-1.4896	-2.0592	-2.53161	-1.84094	6.59864	29.9659	1.97765e-10	6.66809e-10
1556012_at	KLHDC7A	kelch domain containing 7A	127707	-1.78438	-2.84669	-3.47846	-3.9637	-3.75782	-3.6766	-4.45466	6.75726	113.851	5.94518e-17	8.82453e-16
1556035_s_at	ZNF207	zinc finger protein 207	7756	2.05129	2.68003	2.58903	2.61348	2.82587	2.07717	2.15426	8.02085	125.478	1.90565e-17	3.20048e-16
1556039_s_at	GPR173	G protein-coupled receptor 173	54328	1.23004	1.30626	1.35946	1.43713	1.72984	1.50612	1.59633	6.53969	13.9666	4.07487e-07	8.15446e-07
1556043_a_at	LOC100131039	Hypothetical protein LOC100131039	100131039	1.13632	1.39588	1.36469	1.41448	1.30549	1.30238	1.27611	7.31672	10.8023	4.0587e-06	7.1762e-06
1556046_a_at	LOC157627	hypothetical LOC157627	157627	1.14076	1.06782	1.04789	1.15686	1.62622	1.47163	2.15495	8.02547	39.0258	1.14633e-11	4.86347e-11
1556047_s_at	MAGEE1	melanoma antigen family E, 1	57692	1.06462	-1.23296	-1.19826	-1.15163	-1.02795	-1.01667	1.10845	7.48886	10.0258	7.66644e-06	1.31533e-05
1556049_at	RTN4	reticulon 4	57142	1.3914	1.62541	1.58028	1.80008	2.25199	1.59772	1.8892	7.69617	22.3197	4.23931e-09	1.13878e-08
1556051_a_at	BICD1	bicaudal D homolog 1 (Drosophila)	636	1.40526	1.57668	1.54695	1.90655	2.04322	1.32493	1.69046	6.9935	24.0804	1.94847e-09	5.53829e-09
1556053_at	DNAJC7	DnaJ (Hsp40) homolog, subfamily C, member 7	7266	1.61723	2.0051	1.80641	1.83976	2.07729	1.91212	1.57688	7.66032	40.5887	7.45579e-12	3.27799e-11
1556054_at	---	---	---	1.92815	6.07382	5.84758	7.51551	6.86467	3.70154	6.37648	6.45819	269.822	2.21366e-21	1.20593e-19
1556057_s_at	NEUROD1	neurogenic differentiation 1	4760	1.13016	2.52423	4.12128	16.2717	3.87865	4.05199	4.93935	7.45287	564.189	3.22425e-25	6.48124e-23
1556059_s_at	SPEN	spen homolog, transcriptional regulator (Drosophila)	23013	1.74279	1.6045	1.69323	1.71393	2.06682	1.61623	1.6692	7.09949	34.348	4.58832e-11	1.73921e-10
1556060_a_at	ZNF451	zinc finger protein 451	26036	1.1779	1.37669	1.46853	1.45431	1.61849	-1.11939	1.31058	8.88198	34.1363	4.90472e-11	1.85076e-10
1556061_at	RPP30	ribonuclease P/MRP 30kDa subunit	10556	-1.12063	-1.50456	-1.51532	-1.40379	-1.77115	-2.74326	-2.19104	6.90963	34.0347	5.06486e-11	1.90371e-10
1556066_at	KDM6B	lysine (K)-specific demethylase 6B	23135	1.06482	1.09885	1.12868	1.37822	1.26793	1.25565	1.18838	7.08996	6.89828	0.000146408	0.00021892
1556067_a_at	KDM6B	lysine (K)-specific demethylase 6B	23135	1.00993	1.21426	1.3413	1.52651	1.32508	1.48405	1.26929	6.29758	12.0615	1.54382e-06	2.8782e-06
1556069_s_at	HIF3A	hypoxia inducible factor 3, alpha subunit	64344	1.3167	1.28934	1.26394	1.08013	1.23466	1.46693	1.23177	7.02103	15.9953	1.13808e-07	2.45438e-07
1556088_at	RPAIN	RPA interacting protein	84268	3.31888	4.53613	3.78621	4.06749	4.36509	2.83138	3.759	7.06388	62.9297	5.54273e-14	3.86783e-13
1556103_at	---	---	---	-1.16532	-1.04625	-1.06587	-1.21611	-1.25125	-1.20328	-1.41434	8.57523	14.1539	3.60159e-07	7.25833e-07
1556121_at	NAP1L1	nucleosome assembly protein 1-like 1	4673	-1.02424	-1.38524	-1.64387	-1.12262	-1.07688	-1.30818	-1.33314	8.20002	11.2719	2.80519e-06	5.06027e-06
1556123_a_at	---	---	---	-1.02613	-1.26843	-1.37201	-1.09771	-1.02793	-1.04209	-1.10736	6.63598	6.01523	0.000387504	0.000556141
1556126_s_at	GPATCH2	G patch domain containing 2	55105	1.09829	1.60364	1.76252	1.48846	1.70917	1.04723	1.14837	6.47613	23.4435	2.5665e-09	7.14612e-09
1556128_a_at	RASGRF2	Ras protein-specific guanine nucleotide-releasing factor 2	5924	-2.27192	-2.27736	-2.26616	-2.61025	-2.35524	-2.3765	-2.32323	5.61411	32.1911	9.21329e-11	3.30946e-10
1556151_at	ITFG1	Integrin alpha FG-GAP repeat containing 1	81533	-1.29406	-1.2927	-1.21201	1.16308	1.12403	1.13134	1.41238	9.20428	33.39	6.22282e-11	2.30573e-10
1556165_at	---	---	---	-1.66406	-1.90071	-2.01201	-2.14756	-2.23551	-1.84367	-2.28658	6.42651	32.7191	7.73901e-11	2.81538e-10
1556173_a_at	---	---	---	1.05048	1.25003	1.09743	1.29713	1.38094	1.31645	1.44498	6.50382	7.18035	0.00010889	0.000164787
1556180_at	LOC729678	hypothetical protein LOC729678	729678	-1.32152	1.02495	1.00906	1.13888	1.17765	1.34866	1.50569	7.09147	38.722	1.24856e-11	5.26188e-11
1556186_s_at	KIAA0090	KIAA0090	23065	1.37683	1.40318	1.33745	1.53199	1.66258	1.50217	1.3706	7.10116	24.0221	1.99768e-09	5.66449e-09
1556195_a_at	---	---	---	-1.07359	-1.04763	-1.25711	-1.00328	-1.00512	1.42768	1.42478	6.36207	29.6667	2.19983e-10	7.36144e-10
1556242_a_at	---	---	---	-1.08509	-1.3349	-1.39631	-1.349	-1.44139	-1.27189	-1.40067	6.44291	8.96862	1.92708e-05	3.16133e-05
1556265_at	LOC400831	hypothetical LOC400831	400831	-1.08721	-1.08136	-1.05402	-1.16712	-1.17898	1.03365	-1.03291	8.35725	5.90549	0.000439629	0.000627754
1556277_a_at	PAPD4	PAP associated domain containing 4	167153	1.50028	2.76322	2.92182	2.35026	3.1339	2.08088	2.075	6.53821	42.6271	4.34908e-12	2.01027e-11
1556283_s_at	FGFR1OP2	FGFR1 oncogene partner 2	26127	-1.85717	-1.33253	-1.01707	1.06188	-1.09849	-1.75535	-1.24855	6.70133	35.5044	3.20786e-11	1.252e-10
1556285_s_at	PPA2	pyrophosphatase (inorganic) 2	27068	-1.39653	-1.0723	-1.23011	-1.27868	-1.70308	-1.60652	-1.86584	9.9067	25.4925	1.08069e-09	3.20412e-09
1556291_at	POM121L12	POM121 membrane glycoprotein-like 12 (rat)	285877	-1.06376	-1.06741	-1.03952	-1.29246	-1.14344	-1.00672	-1.17218	8.81226	5.96819	0.000408985	0.000585578
1556308_at	PRRT3	proline-rich transmembrane protein 3	285368	1.6809	1.07768	1.08187	-1.16162	-1.17518	-1.13017	-1.15002	6.50204	42.2856	4.75226e-12	2.17377e-11
1556316_s_at	LOC284889	hypothetical protein LOC284889	284889	-1.26612	-1.47269	-1.39302	-1.464	-1.50213	-1.48946	-1.59504	6.78821	8.93571	1.98539e-05	3.25184e-05
1556336_at	CCBL2 /// LOC100131735 /// RBMX	cysteine conjugate-beta lyase 2 /// similar to RNA binding motif protein, X-linked /// RNA binding motif protein, X-linked	100131735 /// 27316 /// 56267	1.16826	2.3296	1.72224	1.40823	1.17839	1.25826	1.42512	6.91628	21.4791	6.2577e-09	1.63445e-08
1556344_at	LOC150051	hypothetical LOC150051	150051	-1.14935	-1.09999	-1.06175	-1.33184	-1.34647	-1.1172	-1.23301	6.51341	5.54839	0.00066856	0.000936295
1556352_at	---	---	---	1.18547	1.5203	1.62157	1.42814	1.46844	1.23141	1.15038	7.32015	12.9879	7.93384e-07	1.52949e-06
1556373_a_at	---	---	---	1.29344	1.63838	1.86143	1.66772	1.81026	1.72806	1.46655	6.47007	23.4407	2.56961e-09	7.15401e-09
1556416_s_at	---	---	---	1.19444	1.68377	2.08528	2.16852	2.15	1.54437	1.39452	6.11511	37.2348	1.9137e-11	7.78175e-11
1556429_a_at	WDR67	WD repeat domain 67	93594	-1.00837	-1.10447	-1.42504	-1.58026	-1.75358	-1.64813	-1.99094	6.27467	24.7423	1.47281e-09	4.27815e-09
1556442_x_at	---	---	---	1.27744	1.59242	1.6272	1.54393	1.70128	1.55407	1.48651	8.93897	29.2292	2.57472e-10	8.49429e-10
1556444_a_at	---	---	---	-1.02128	1.08871	1.16743	1.55407	1.41866	1.42717	1.64262	6.82131	15.1363	1.9219e-07	4.01359e-07
1556462_a_at	---	---	---	1.07657	2.11568	2.37377	1.70927	3.26689	1.57025	1.87882	5.82271	61.8147	6.78949e-14	4.64411e-13
1556469_s_at	---	---	---	2.23017	1.24665	-1.35828	-2.31386	-1.83955	-2.44429	-3.15338	5.88179	205.27	5.72613e-20	1.97979e-18
1556499_s_at	COL1A1	collagen, type I, alpha 1	1277	-1.14886	-1.44091	1.66074	5.64634	5.74667	8.67186	4.77768	11.1552	338.392	1.48129e-22	1.16398e-20
1556533_at	C17orf52	chromosome 17 open reading frame 52	283994	1.00643	-1.20032	-1.21585	-1.18535	-1.15986	-1.18429	-1.18792	6.63427	6.46281	0.000234457	0.000343406
1556551_s_at	SLC39A6	solute carrier family 39 (zinc transporter), member 6	25800	-1.02073	1.3093	1.2951	1.52939	1.586	1.56852	1.74066	7.46207	22.3768	4.13055e-09	1.11109e-08
1556567_at	NAP1L4	nucleosome assembly protein 1-like 4	4676	1.22114	1.6016	1.59679	1.45214	1.42203	1.41584	1.42827	7.97158	20.6804	9.16774e-09	2.32953e-08
1556568_a_at	---	---	---	1.81436	2.07971	2.61606	1.74958	2.51153	1.2528	1.15835	6.24659	46.7382	1.56942e-12	7.92073e-12
1556579_s_at	IGSF10	immunoglobulin superfamily, member 10	285313	1.10698	1.23652	1.77699	3.71937	1.66255	1.42499	-1.12331	6.28288	78.378	4.50944e-15	4.03222e-14
1556588_at	C15orf37	chromosome 15 open reading frame 37	283687	-1.21059	-1.49824	-1.32022	-1.14928	-1.39746	-1.29037	-1.7627	6.91251	14.2307	3.42492e-07	6.92003e-07
1556595_at	---	---	---	2.13876	3.50862	3.50555	2.85787	3.55028	2.01518	1.96982	5.93887	32.6658	7.87558e-11	2.86065e-10
1556606_at	NAV2	neuron navigator 2	89797	-1.03187	1.29479	1.70106	4.01869	4.4269	2.79798	4.60652	7.06899	96.1437	4.25647e-16	4.92304e-15
1556613_s_at	LOC203107	hypothetical protein LOC203107	203107	-1.19006	-1.22487	-1.31464	-1.13749	-1.09751	-1.18433	-1.23968	6.48347	6.17035	0.000324861	0.000469537
1556629_a_at	SNAP25	Synaptosomal-associated protein, 25kDa	6616	-1.0561	1.28789	1.19321	1.92917	3.15589	2.30203	4.19485	5.81964	105.323	1.47429e-16	1.93568e-15
1556638_at	PAX7	paired box 7	5081	1.03685	1.44644	1.32138	1.47568	2.46743	1.70976	2.53172	6.77916	65.6275	3.43907e-14	2.50431e-13
1556646_at	---	---	---	1.11345	1.28635	1.37491	1.53556	1.75366	1.47546	1.64333	8.34205	35.2916	3.42358e-11	1.3286e-10
1556650_at	---	---	---	1.16514	1.93776	2.09957	2.19834	2.94408	1.76211	2.29016	6.69646	34.0672	5.01307e-11	1.88643e-10
1556656_at	---	---	---	1.30509	1.62746	1.7469	1.53348	1.85184	1.41795	1.49872	7.29265	15.5139	1.5223e-07	3.22971e-07
1556682_s_at	---	---	---	1.32099	1.8409	2.42627	3.15371	5.52101	2.25677	3.34274	5.83321	114.301	5.67759e-17	8.46611e-16
1556690_s_at	---	---	---	1.31357	1.57168	1.4117	1.54714	1.81602	1.49505	1.38586	7.43759	15.4946	1.54037e-07	3.26574e-07
1556744_a_at	---	---	---	1.13476	1.98656	2.05959	2.29972	2.43668	2.44116	2.21933	6.94826	79.4571	3.85324e-15	3.50099e-14
1556818_at	---	---	---	2.00973	3.19638	3.27722	2.9534	3.88003	1.92695	2.77656	7.14799	65.0943	3.7737e-14	2.73111e-13
1556821_x_at	DLEU2	deleted in lymphocytic leukemia 2 (non-protein coding)	8847	1.40049	3.22514	3.27984	3.57573	4.70966	1.81342	2.09819	6.34672	74.0138	8.70503e-15	7.28632e-14
1556826_s_at	C1orf187	chromosome 1 open reading frame 187	374946	1.39907	1.4725	1.48445	1.55545	2.59739	1.71422	2.5994	6.78442	52.9498	3.89447e-13	2.25217e-12
1556854_at	LOC283501	hypothetical protein LOC283501	283501	-1.26934	-1.25593	-1.22283	-1.49946	-1.53582	-1.39875	-1.54004	6.83704	15.3532	1.68019e-07	3.54335e-07
1556900_at	LOC149773	hypothetical protein LOC149773	149773	-1.14225	-1.17113	-1.15142	-1.36771	-1.26534	-1.15218	-1.18482	8.03681	5.66747	0.000580483	0.000817671
1556927_at	KCNK10	potassium channel, subfamily K, member 10	54207	-1.00871	1.25288	1.57591	2.24668	3.56329	2.03542	4.48948	5.43366	158.649	1.20774e-18	2.86009e-17
1556950_s_at	SERPINB6	serpin peptidase inhibitor, clade B (ovalbumin), member 6	5269	-1.19573	-1.01328	1.2418	1.32453	1.04066	1.3823	1.1109	6.88276	13.4201	5.88496e-07	1.15302e-06
1556984_at	---	---	---	1.07375	1.12669	1.16205	1.21373	1.40284	1.36148	1.39047	6.63658	10.88	3.81523e-06	6.76464e-06
1556987_s_at	OR2H1	olfactory receptor, family 2, subfamily H, member 1	26716	1.11204	1.12097	1.26175	-1.04206	1.07796	1.27841	1.06351	6.96692	5.94531	0.000419893	0.000600532
1556988_s_at	CHD1L	chromodomain helicase DNA binding protein 1-like	9557	-1.07738	-1.02756	-1.02189	-1.07138	-1.11196	-1.26077	-1.49739	8.90204	13.0898	7.38953e-07	1.43116e-06
1556989_at	---	---	---	1.02859	1.8804	3.06435	4.45174	2.41408	2.08225	1.59655	7.06397	111.068	7.93731e-17	1.12912e-15
1557008_at	LOC340107	hypothetical protein LOC340107	340107	1.14882	-1.13769	-1.30138	-1.17717	-1.29133	-1.31837	-1.4397	6.4423	5.53397	0.000680167	0.000951522
1557051_s_at	---	---	---	-1.165	1.83489	2.52092	2.83881	3.43898	2.22814	3.87898	6.77461	165.893	7.12964e-19	1.79146e-17
1557053_s_at	UBE2G2	ubiquitin-conjugating enzyme E2G 2 (UBC7 homolog, yeast)	7327	1.30773	1.1211	1.02462	1.10098	1.25133	-1.03915	-1.04761	9.3836	7.81901	5.70725e-05	8.90837e-05
1557065_at	YLPM1	YLP motif containing 1	56252	1.34526	1.86705	2.26069	1.76392	2.56465	1.47727	1.69042	6.95367	89.7776	9.41572e-16	1.00684e-14
1557067_s_at	LUC7L	LUC7-like (S. cerevisiae)	55692	1.20641	1.17454	1.11789	1.12041	1.17891	-1.28638	-1.19101	8.78699	15.0194	2.0676e-07	4.30159e-07
1557073_s_at	TTBK2	Tau tubulin kinase 2	146057	1.2549	1.17083	1.32958	1.4722	1.99933	1.42293	1.64339	6.51734	19.1841	1.93967e-08	4.6915e-08
1557081_at	RBM25	RNA binding motif protein 25	58517	1.86409	2.06768	2.10717	2.02727	2.16004	1.70639	1.51689	9.06339	41.708	5.52918e-12	2.49656e-11
1557089_at	KIF5C	kinesin family member 5C	3800	1.42702	1.6019	1.55571	1.51503	1.75058	1.5621	1.93254	7.88098	14.7912	2.38767e-07	4.92481e-07
1557100_s_at	HECTD1	HECT domain containing 1	25831	1.30494	1.41603	1.60589	1.68989	2.05807	1.17535	1.13672	6.97895	21.3154	6.76048e-09	1.75499e-08
1557105_a_at	ZNF397OS	Zinc finger protein 397 opposite strand	100101467	1.08518	1.17131	1.16744	1.22816	1.25708	1.3553	1.44574	7.80196	5.89182	0.000446631	0.000637051
1557121_s_at	---	---	---	1.1133	1.1748	1.19642	1.3393	1.43667	1.18649	1.51936	7.5186	12.1565	1.4395e-06	2.69242e-06
1557122_s_at	GABRB2	gamma-aminobutyric acid (GABA) A receptor, beta 2	2561	1.40593	1.8275	1.76316	1.39354	1.26837	1.67255	2.45519	6.26516	38.9309	1.17725e-11	4.98243e-11
1557128_at	FAM111B	family with sequence similarity 111, member B	374393	1.16612	1.12952	1.10526	-1.20352	-1.15928	-1.45086	-1.31816	7.84784	26.0913	8.48777e-10	2.56254e-09
1557129_a_at	FAM111B	family with sequence similarity 111, member B	374393	1.62596	1.52135	1.39955	-1.05795	1.15409	-1.86865	-1.63718	6.75828	52.5808	4.21237e-13	2.41822e-12
1557132_at	WDR17	WD repeat domain 17	116966	1.10902	2.43606	2.50044	4.4233	6.19635	5.15602	6.41964	6.01622	126.08	1.80164e-17	3.03563e-16
1557137_at	TMEM17	transmembrane protein 17	200728	1.09849	1.21465	1.13013	1.45281	1.42275	1.3153	1.74181	7.12508	16.7683	7.23488e-08	1.60857e-07
1557143_at	CSMD2	CUB and Sushi multiple domains 2	114784	1.10798	1.06173	1.00044	-1.16407	1.00621	1.20134	1.3235	6.73269	7.21716	0.000104815	0.000158852
1557155_a_at	FLJ30375	Hypothetical gene supported by AK054937	440982	-1.04426	1.03862	1.05432	1.45505	2.09431	1.52663	1.94455	5.94904	24.5203	1.6166e-09	4.65985e-09
1557165_s_at	KLHL18	kelch-like 18 (Drosophila)	23276	-1.25096	-1.29949	-1.35935	-1.47587	-1.44043	-1.3381	-1.52002	6.99914	6.62625	0.000196081	0.000289275
1557170_at	NEK8	NIMA (never in mitosis gene a)- related kinase 8	284086	1.3138	1.44331	1.39222	1.2185	1.47366	1.43811	1.24918	7.92967	12.0327	1.577e-06	2.9354e-06
1557172_x_at	NEK8	NIMA (never in mitosis gene a)- related kinase 8	284086	1.16871	1.32665	1.28964	1.05996	1.15841	1.22031	1.11259	8.99806	7.52714	7.63624e-05	0.000117593
1557174_a_at	---	---	---	-1.29707	1.18721	1.18707	1.49015	1.32608	1.10904	1.12473	7.07947	9.93042	8.30865e-06	1.41959e-05
1557186_s_at	TPCN1	two pore segment channel 1	53373	-1.19669	-1.22647	-1.21414	-1.32325	-1.51715	-1.19951	-1.39682	6.61602	5.76726	0.000516267	0.000730949
1557227_s_at	TPR	translocated promoter region (to activated MET oncogene)	7175	1.5039	2.06463	1.97697	1.93065	1.85179	1.16187	-1.13987	6.66965	13.6411	5.06566e-07	1.00128e-06
1557238_s_at	---	---	---	3.68029	4.78527	4.47798	4.4804	6.95505	3.32516	2.12374	6.62651	109.855	9.022e-17	1.25847e-15
1557240_a_at	---	---	---	1.31295	2.14424	2.08578	1.82754	2.50707	1.70281	1.28514	6.44792	34.4831	4.39803e-11	1.6732e-10
1557246_at	KIDINS220	kinase D-interacting substrate, 220kDa	57498	-1.05599	1.3693	1.49052	1.481	1.81226	1.61754	2.05507	7.01229	66.6887	2.86477e-14	2.12672e-13
1557270_at	---	---	---	1.54655	2.83491	2.44967	3.08513	3.71346	2.31654	3.46732	6.91465	61.9833	6.58296e-14	4.51517e-13
1557300_s_at	---	---	---	2.14645	2.87894	2.82393	2.78142	4.11523	2.36668	2.12912	6.669	97.4701	3.6305e-16	4.29287e-15
1557315_a_at	---	---	---	1.02715	1.21965	1.23776	1.18573	1.23233	1.37116	1.46727	6.74069	9.61522	1.08787e-05	1.83238e-05
1557319_at	---	---	---	-1.03957	1.0615	1.0335	-1.25033	-1.06872	1.10405	1.02711	7.68144	6.07335	0.000362629	0.000521711
1557348_at	---	---	---	1.25719	1.60429	1.41625	1.22621	1.15636	-1.09883	-1.03888	7.41678	13.8772	4.32429e-07	8.62496e-07
1557350_at	G3BP1	GTPase activating protein (SH3 domain) binding protein 1	10146	1.42646	1.90546	1.51297	1.46288	1.53912	1.08162	1.21148	6.05755	24.8247	1.42305e-09	4.14454e-09
1557352_at	SQLE	squalene epoxidase	6713	1.11796	1.38661	1.53124	1.5111	1.86521	2.25486	1.45514	6.90649	22.6283	3.68589e-09	1.0003e-08
1557360_at	LRPPRC	leucine-rich PPR-motif containing	10128	1.43642	1.99824	1.68642	1.30675	1.40396	1.12367	-1.07763	7.66881	39.9378	8.90209e-12	3.84605e-11
1557369_a_at	LOC285401	hypothetical LOC285401	285401	-1.00126	-1.10143	-1.51761	-2.31927	-2.12967	-2.24138	-2.55223	6.5226	39.9596	8.84899e-12	3.82694e-11
1557370_s_at	MYCBP2	MYC binding protein 2	23077	1.02738	1.08984	1.25821	1.18272	1.23383	1.10775	1.29245	7.5836	6.61103	0.00019935	0.00029388
1557384_at	ZNF131	Zinc finger protein 131	7690	1.81435	2.8203	2.36519	2.14784	2.20591	1.48448	1.88302	7.10429	71.6839	1.25564e-14	1.01024e-13
1557385_at	FAM161A	family with sequence similarity 161, member A	84140	1.33555	1.79377	1.46476	1.31972	1.48309	1.15339	1.29493	8.75008	19.817	1.40482e-08	3.46804e-08
1557394_at	DLGAP4	discs, large (Drosophila) homolog-associated protein 4	22839	1.25559	1.51545	1.49434	1.41174	1.92798	1.39714	1.73264	6.92675	29.2066	2.59596e-10	8.5524e-10
1557409_at	---	---	---	1.05849	1.21582	1.2286	1.12862	1.3441	1.28624	1.1843	7.55325	6.61502	0.000198488	0.000292659
1557432_at	RASAL2	RAS protein activator like 2	9462	1.88472	2.4184	2.53955	1.90697	2.68144	1.28037	1.68992	5.92172	27.3403	5.20533e-10	1.629e-09
1557433_at	---	---	---	-1.01788	1.38312	1.59056	1.60668	2.05512	1.56887	1.81238	6.18211	21.2036	7.12907e-09	1.84329e-08
1557455_s_at	MOSPD1	motile sperm domain containing 1	56180	-1.77483	-1.79203	-1.58909	-1.577	-1.95641	-2.39245	-2.38094	6.96449	30.0898	1.89284e-10	6.40522e-10
1557458_s_at	SHB	Src homology 2 domain containing adaptor protein B	6461	1.04541	-1.2438	-1.189	-1.38295	-1.40881	-1.14334	-1.33921	6.33509	11.8136	1.85639e-06	3.42449e-06
1557478_at	---	---	---	1.0427	1.20919	1.44625	1.59385	1.64743	1.47702	1.47453	6.58689	21.0845	7.5458e-09	1.94445e-08
1557507_at	---	---	---	-1.22333	1.08645	1.13408	1.28354	1.28967	1.3442	1.66882	7.02853	22.03	4.84129e-09	1.28825e-08
1557521_a_at	---	---	---	1.29489	1.28139	1.2213	1.45183	1.41267	1.49392	1.41495	7.75144	8.49613	2.97716e-05	4.78676e-05
1557522_x_at	---	---	---	1.29144	1.10748	1.13724	1.2371	1.33116	1.37266	1.21858	6.72206	6.13157	0.000339427	0.000489581
1557545_s_at	RNF165	ring finger protein 165	494470	1.16083	1.7485	2.11233	4.0902	6.89546	5.1795	6.47936	6.87322	99.8776	2.73437e-16	3.34458e-15
1557586_s_at	ATP6V1H	ATPase, H+ transporting, lysosomal 50/57kDa, V1 subunit H	51606	1.33454	1.40545	1.41156	1.28713	1.48041	1.39352	1.34003	6.59159	8.29276	3.60717e-05	5.7452e-05
1557675_at	RAF1	V-raf-1 murine leukemia viral oncogene homolog 1	5894	1.45528	1.73221	1.79285	1.92792	2.09127	1.71763	1.91286	7.94382	23.3069	2.72487e-09	7.55464e-09
1557676_at	---	---	---	-1.1216	-1.06424	-1.02359	-1.50395	-1.19724	-1.0652	-1.17332	6.86691	8.96789	1.92834e-05	3.1632e-05
1557684_at	ZNF286A	zinc finger protein 286A	57335	1.70765	1.72145	1.8571	1.66132	1.96815	1.23638	1.56263	8.44319	29.6293	2.22946e-10	7.44808e-10
1557718_at	PPP2R5C	protein phosphatase 2, regulatory subunit B', gamma isoform	5527	1.59273	2.62641	2.59724	2.26975	3.51416	2.38638	2.15875	6.19265	58.8384	1.18723e-13	7.70808e-13
1557721_at	---	---	---	1.01045	1.15782	1.02413	-1.07243	1.02059	1.19592	1.23142	6.62986	7.64602	6.77683e-05	0.000104976
1557797_a_at	---	---	---	1.3041	2.85836	2.37773	3.23369	3.72065	1.93921	1.81276	5.95261	31.3091	1.23998e-10	4.34219e-10
1557809_a_at	---	---	---	1.26609	1.9162	1.68805	1.24745	1.32685	1.19128	1.07977	7.00352	18.6472	2.56773e-08	6.09575e-08
1557813_at	---	---	---	1.35624	2.2122	2.15385	2.06426	2.56138	2.46553	2.26521	8.77395	99.7504	2.77517e-16	3.38172e-15
1557814_a_at	---	---	---	1.20855	1.65598	1.51425	1.44317	1.73928	1.78479	1.68052	8.6298	18.8826	2.26877e-08	5.42876e-08
1557817_a_at	LOC100131941	Hypothetical protein LOC100131941	100131941	-1.02964	1.33269	1.27674	1.19254	1.3024	1.4815	1.26261	7.40535	14.8481	2.30312e-07	4.76444e-07
1557820_at	AFG3L2	AFG3 ATPase family gene 3-like 2 (yeast)	10939	1.29199	-1.34586	-1.45052	-1.26478	-1.21229	-1.37134	-1.62399	10.2785	67.5757	2.46416e-14	1.85805e-13
1557828_a_at	C5orf28	Chromosome 5 open reading frame 28	64417	2.00911	3.41632	3.16314	3.14933	3.31371	2.0359	2.20613	6.11259	80.8927	3.13553e-15	2.92055e-14
1557905_s_at	CD44	CD44 molecule (Indian blood group)	960	-1.98183	-2.08657	-2.16193	-2.28066	-2.35867	-1.72358	-1.77567	6.59204	45.1864	2.2829e-12	1.11659e-11
1557910_at	HSP90AB1	heat shock protein 90kDa alpha (cytosolic), class B member 1	3326	1.29837	1.20944	1.20993	1.02393	-1.01448	-1.3091	-1.58725	11.6732	22.4932	3.91792e-09	1.0584e-08
1557915_s_at	GSTO1	glutathione S-transferase omega 1	9446	-1.25466	-1.04677	-1.00822	-1.17291	-1.57634	-1.37828	-2.41434	10.7154	53.9792	3.13712e-13	1.85855e-12
1557918_s_at	SLC16A1	solute carrier family 16, member 1 (monocarboxylic acid transporter 1)	6566	-1.41779	-1.34102	-1.48982	-2.07357	-2.37149	-2.62578	-2.87411	7.37317	61.3354	7.41599e-14	5.03546e-13
1557938_s_at	PTRF	polymerase I and transcript release factor	284119	-1.16314	-1.376	-1.33148	-1.32732	-1.49314	-1.17653	-1.29997	7.60886	7.07036	0.000122115	0.000183996
1557950_at	SDCCAG1	serologically defined colon cancer antigen 1	9147	1.23274	1.51092	1.71399	1.58561	1.48903	1.04477	1.53293	8.1075	21.4176	6.4418e-09	1.67882e-08
1557953_at	ZKSCAN1	zinc finger with KRAB and SCAN domains 1	7586	1.78869	2.11329	2.4882	3.24444	4.86324	2.67814	3.31937	7.68288	84.4999	1.89628e-15	1.88086e-14
1557954_at	CXorf15	chromosome X open reading frame 15	55787	1.16454	-1.36424	-1.42934	-1.64437	-1.61944	-1.7931	-1.7171	8.18246	47.6172	1.27567e-12	6.57381e-12
1557961_s_at	LOC100127983	hypothetical protein LOC100127983	100127983	-1.8622	-2.09906	-3.12616	-4.10652	-5.31913	-4.63423	-7.19468	6.96305	319.195	2.97771e-22	2.10395e-20
1557965_at	MTERFD2	MTERF domain containing 2	130916	-1.07002	-1.39544	-1.54015	-1.40291	-1.46199	-1.67818	-1.88917	7.59371	19.3296	1.7996e-08	4.37597e-08
1557966_x_at	MTERFD2	MTERF domain containing 2	130916	1.03438	-1.24782	-1.43156	-1.24231	-1.39643	-1.53543	-1.66213	7.60591	21.5966	5.92166e-09	1.55294e-08
1557985_s_at	CEP78	centrosomal protein 78kDa	84131	-1.00122	1.07324	-1.00501	-1.0536	-1.11789	-1.35835	-1.55924	7.86917	17.0502	6.15803e-08	1.3829e-07
1557987_at	LOC641298	SMG1 homolog, phosphatidylinositol 3-kinase-related kinase pseudogene	641298	2.21689	3.19665	2.5369	2.34235	2.55012	1.66038	1.8083	7.60536	78.3383	4.53583e-15	4.05441e-14
1557996_at	LOC100132832 /// PMS2L1 /// PMS2L2	postmeiotic segregation increased 2-like 5-like /// postmeiotic segregation increased 2-like 1 pseudogene /// postmeiotic segregation increased 2-like 2 pseudogene	100132832 /// 5379 /// 5380	1.43669	2.13586	1.99552	2.2235	2.88433	1.97231	2.15386	7.28789	24.194	1.85625e-09	5.30116e-09
1558002_at	STRAP	Serine/threonine kinase receptor associated protein	11171	1.10712	1.81427	1.87327	1.61036	1.55262	1.21904	1.47452	6.944	30.4848	1.64779e-10	5.63927e-10
1558015_s_at	ACTR2	ARP2 actin-related protein 2 homolog (yeast)	10097	-1.42274	-1.3955	-1.2674	-1.57808	-1.62415	-1.89614	-2.07141	6.81376	24.8475	1.40958e-09	4.10926e-09
1558017_s_at	---	---	---	1.64801	2.38567	1.48654	1.32363	1.48559	1.13838	1.11433	6.64127	22.9473	3.19494e-09	8.75587e-09
1558027_s_at	PRKAB2	protein kinase, AMP-activated, beta 2 non-catalytic subunit	5565	-1.00439	1.11523	1.17833	1.16286	1.13444	1.12654	-1.22604	7.63266	11.6808	2.05157e-06	3.76233e-06
1558041_a_at	KIAA0895L	KIAA0895-like	653319	1.1591	1.34778	1.30794	1.67081	2.54219	2.13811	2.50569	7.42458	78.3808	4.5076e-15	4.03196e-14
1558044_s_at	EXOSC6	exosome component 6	118460	1.26721	1.13589	1.15619	1.31666	1.38401	1.10761	1.14708	7.88649	8.24576	3.77236e-05	5.99945e-05
1558048_x_at	---	---	---	5.3592	1.65791	2.41749	5.01479	6.8174	16.1777	4.77047	5.50941	449.874	4.88848e-24	6.70705e-22
1558078_at	---	---	---	1.64984	2.65031	2.71184	2.66937	3.80421	1.87992	2.61332	6.37648	48.2332	1.10554e-12	5.76815e-12
1558093_s_at	MATR3	matrin 3	9782	1.0203	1.06301	1.27579	1.0184	1.09297	-1.48896	-1.35156	8.38318	8.93796	1.98135e-05	3.24563e-05
1558097_at	C22orf30	chromosome 22 open reading frame 30	253143	1.67572	1.30795	1.12342	1.10537	1.07863	-1.21419	-1.08501	9.34596	46.881	1.51712e-12	7.68631e-12
1558102_at	---	---	---	-1.09684	-1.22646	-1.19837	1.01792	1.24874	1.11409	1.40808	8.40452	22.8149	3.38954e-09	9.25006e-09
1558103_a_at	---	---	---	1.09149	-1.04549	1.00469	1.24649	1.48652	1.20283	1.37239	8.13671	17.5165	4.73905e-08	1.08338e-07
1558115_at	RECK	reversion-inducing-cysteine-rich protein with kazal motifs	8434	-1.70641	-2.03327	-2.07621	-1.93421	-2.13214	-2.03027	-2.85864	5.85518	15.5474	1.49151e-07	3.16837e-07
1558116_x_at	RECK	reversion-inducing-cysteine-rich protein with kazal motifs	8434	-1.58661	-1.78209	-1.82021	-1.89978	-1.9284	-1.82494	-2.18172	6.35047	43.2938	3.66462e-12	1.72151e-11
1558122_s_at	---	---	---	-1.07445	1.13556	1.12423	1.20689	1.50272	1.46244	2.37045	6.12834	66.1464	3.14403e-14	2.3135e-13
1558136_s_at	TAF11	TAF11 RNA polymerase II, TATA box binding protein (TBP)-associated factor, 28kDa	6882	1.33242	-1.12069	-1.14024	-1.07349	-1.145	-1.32686	-1.18844	8.38264	13.0335	7.68504e-07	1.48396e-06
1558142_at	TNRC6B	trinucleotide repeat containing 6B	23112	1.45864	1.33658	1.21251	1.66854	2.46361	1.53852	1.72958	8.85747	32.54	8.20817e-11	2.97396e-10
1558143_a_at	BCL2L11	BCL2-like 11 (apoptosis facilitator)	10018	1.43098	1.31546	1.50242	1.06464	1.05627	1.1021	1.08648	6.61205	8.71124	2.43775e-05	3.95628e-05
1558164_s_at	PEX13	peroxisomal biogenesis factor 13	5194	-1.4098	-1.26045	-1.18996	-1.24862	-1.28103	-1.33174	1.00647	6.36291	10.2157	6.54265e-06	1.13158e-05
1558173_a_at	LUZP1	leucine zipper protein 1	7798	1.14029	1.11484	1.03309	1.06571	-1.19069	-1.64159	-1.65991	8.85149	26.6868	6.7063e-10	2.05703e-09
1558174_at	FAM43A	family with sequence similarity 43, member A	131583	-1.20697	-1.22437	-1.25333	-1.29095	-1.49286	-1.18316	-1.05172	6.62104	7.97415	4.902e-05	7.69967e-05
1558199_at	FN1	fibronectin 1	2335	1.07588	2.22966	3.72319	2.92428	2.61645	2.22073	1.19247	6.80964	66.1366	3.14938e-14	2.31678e-13
1558208_at	---	---	---	-1.29695	-1.19682	-1.30479	-1.39785	-1.43755	-1.27194	-1.44892	6.92383	7.31833	9.44402e-05	0.000143843
1558212_at	FLJ35024	hypothetical LOC401491	401491	-1.27969	-1.3006	-1.31154	-1.68286	-1.44282	-1.21041	-1.45901	6.89265	20.6885	9.13199e-09	2.3209e-08
1558220_at	MUC20	Mucin 20, cell surface associated	200958	1.41093	1.75668	1.90588	2.61257	2.45284	1.71079	2.10934	5.94461	25.5656	1.049e-09	3.11766e-09
1558233_s_at	ATF1	activating transcription factor 1	466	-1.07278	-1.23777	-1.4076	-1.30679	-1.53448	-1.96582	-1.77972	7.84778	12.7473	9.39858e-07	1.79558e-06
1558249_s_at	STX16	syntaxin 16	8675	1.25842	1.53028	1.59449	1.25627	1.26361	1.1444	1.02848	6.38804	12.175	1.4201e-06	2.65804e-06
1558250_s_at	---	---	---	1.06312	1.27581	1.17278	1.31719	1.58429	-1.13569	1.33027	6.64416	26.4199	7.44903e-10	2.26874e-09
1558251_a_at	ZNF587	zinc finger protein 587	84914	1.01493	1.46461	1.53261	1.80193	1.65117	1.07928	1.18342	7.76926	18.1875	3.28212e-08	7.66608e-08
1558253_x_at	ZNF587	zinc finger protein 587	84914	1.01401	1.43224	1.53895	1.66231	1.65955	1.0833	1.16991	7.74558	22.104	4.67927e-09	1.24782e-08
1558254_s_at	SRPK2	SFRS protein kinase 2	6733	-1.26044	-1.50027	-1.31779	-1.0094	1.00472	-1.08626	1.02149	6.89693	14.8346	2.32293e-07	4.80311e-07
1558292_s_at	PIGW	phosphatidylinositol glycan anchor biosynthesis, class W	284098	1.78045	-1.21597	-1.72068	-1.72104	-1.72217	-2.94614	-3.44952	7.70831	109.857	9.02047e-17	1.25847e-15
1558295_a_at	PPFIA2	protein tyrosine phosphatase, receptor type, f polypeptide (PTPRF), interacting protein (liprin), alpha 2	8499	-1.00869	1.05791	1.16826	1.43932	2.05876	2.11816	4.32548	5.32645	128.024	1.50573e-17	2.59092e-16
1558342_x_at	DIXDC1	DIX domain containing 1	85458	-1.02744	1.1403	1.19394	1.21688	1.27768	1.31207	1.23103	6.79447	6.72388	0.00017643	0.000261546
1558345_a_at	LOC439911	hypothetical gene supported by NM_194304	439911	-1.221	-1.38536	-1.24687	1.19814	1.15153	1.0828	1.53498	6.7303	18.9226	2.22184e-08	5.32383e-08
1558368_s_at	C1orf187	chromosome 1 open reading frame 187	374946	1.15394	1.20301	1.20857	1.14772	1.70243	1.27879	1.93593	7.90376	19.2916	1.83513e-08	4.45693e-08
1558369_at	MPHOSPH9	M-phase phosphoprotein 9	10198	1.06434	1.53492	1.40601	1.428	1.67312	1.01882	1.21643	8.18586	17.9941	3.64448e-08	8.45834e-08
1558387_at	LOC643763	hypothetical LOC643763	643763	1.1783	1.49177	1.91181	5.20302	8.96568	5.46448	5.66383	4.82131	235.849	1.09957e-20	4.77605e-19
1558388_a_at	LOC643763	hypothetical LOC643763	643763	1.51102	2.75873	3.34202	12.5129	21.2913	12.3637	12.9668	6.35521	344.629	1.19056e-22	9.64767e-21
1558410_s_at	---	---	---	1.38138	2.25214	2.24796	1.9253	1.92945	1.09308	1.31865	6.24063	26.3503	7.65694e-10	2.32826e-09
1558411_at	C3orf50	chromosome 3 open reading frame 50	93556	1.36396	2.05399	2.52921	4.35936	7.06907	2.7139	5.31314	5.57209	98.8939	3.06771e-16	3.69785e-15
1558426_x_at	ORAI2	ORAI calcium release-activated calcium modulator 2	80228	1.47912	2.06144	1.85884	1.83116	2.34281	2.36045	2.00706	9.83815	46.8699	1.5211e-12	7.70083e-12
1558445_at	---	---	---	1.07664	-1.19534	-1.57566	-1.13636	-1.09886	-1.57779	-1.56884	6.49861	18.7924	2.37863e-08	5.67228e-08
1558467_a_at	---	---	---	1.51286	2.59479	2.58763	2.36187	2.61434	1.50823	2.16934	6.91549	43.7299	3.2806e-12	1.55548e-11
1558476_at	BEND5	BEN domain containing 5	79656	1.04586	1.12486	1.22649	1.19933	1.24667	1.50951	1.46146	6.43322	16.4641	8.62953e-08	1.89637e-07
1558487_a_at	TMED4	transmembrane emp24 protein transport domain containing 4	222068	1.18977	1.36329	1.5468	1.90869	2.20794	1.88323	2.31478	8.40659	53.3785	3.5574e-13	2.0772e-12
1558504_at	---	---	---	1.16498	1.29724	1.32641	1.2608	1.33218	1.22876	1.113	7.3535	9.02344	1.834e-05	3.01627e-05
1558511_s_at	FAM62B	family with sequence similarity 62 (C2 domain containing) member B	57488	-1.1923	-1.23499	-1.12147	-1.55966	-1.85337	-2.16293	-2.57296	7.91367	65.6074	3.45105e-14	2.51131e-13
1558515_at	---	---	---	1.51344	2.4724	1.78484	1.5412	1.70362	1.33212	1.7093	6.91855	22.2572	4.36201e-09	1.16863e-08
1558522_at	---	---	---	2.05473	-1.29294	-1.27899	-1.05803	-1.69019	-1.57235	-3.06595	6.55038	148.058	2.72694e-18	5.80561e-17
1558569_at	UNQ6228	Hypothetical LOC100131541	100131541	1.74859	1.87592	2.60459	2.36736	4.50933	2.48422	2.39957	6.75387	58.7092	1.21711e-13	7.88627e-13
1558620_at	ZNF621	zinc finger protein 621	285268	1.25192	1.13776	1.13691	1.37002	1.36533	1.00918	1.01931	7.33564	12.984	7.95527e-07	1.5334e-06
1558643_s_at	EDIL3	EGF-like repeats and discoidin I-like domains 3	10085	-1.28698	-1.18471	-1.31476	-1.44063	-1.4637	-1.47115	-1.29104	6.4244	6.70357	0.000180335	0.000267032
1558675_s_at	SDCCAG1	serologically defined colon cancer antigen 1	9147	1.29359	1.47825	1.46271	1.47617	1.43329	1.12897	1.20945	8.42339	7.75235	6.09612e-05	9.48907e-05
1558678_s_at	MALAT1	metastasis associated lung adenocarcinoma transcript 1 (non-protein coding)	378938	1.31686	2.82674	3.2383	3.61807	3.98151	3.1605	3.81303	11.9897	49.2068	8.8469e-13	4.70891e-12
1558680_s_at	PDE1A	phosphodiesterase 1A, calmodulin-dependent	5136	-1.04295	1.20464	1.19655	1.8582	2.29827	2.02777	3.99007	5.96405	47.2593	1.38739e-12	7.08893e-12
1558685_a_at	LOC158960	hypothetical protein BC009467	158960	1.04919	1.18857	1.2452	1.23261	1.27727	1.31171	1.47675	8.30921	11.0425	3.35541e-06	5.9936e-06
1558688_at	LOC441461	hypothetical LOC441461	441461	1.07981	1.18659	1.3113	1.3286	1.3252	1.625	1.37528	10.7484	16.4851	8.52465e-08	1.87476e-07
1558693_s_at	C1orf85	chromosome 1 open reading frame 85	112770	-1.06338	-1.27195	-1.2496	-1.19614	-1.45094	-1.17332	-1.34077	7.8147	8.10809	4.30509e-05	6.8062e-05
1558695_at	---	---	---	1.66146	2.18433	2.20103	1.76864	2.04732	1.63154	1.41962	8.37424	58.0927	1.37132e-13	8.77368e-13
1558700_s_at	ZNF260	zinc finger protein 260	339324	1.54564	1.57966	1.35738	1.5847	1.94893	1.13274	1.77077	8.60165	14.6273	2.65042e-07	5.4309e-07
1558714_at	---	---	---	3.18979	7.6977	7.07319	5.72738	8.94226	3.6153	5.80256	7.82492	294.063	7.93068e-22	4.89644e-20
1558732_at	MAP4K4	mitogen-activated protein kinase kinase kinase kinase 4	9448	1.98381	4.32954	4.0858	5.0611	6.53325	3.6964	5.34861	8.4286	142.551	4.26033e-18	8.55066e-17
1558740_s_at	---	---	---	1.16333	1.32161	1.41709	1.55374	1.93305	1.65061	1.62536	6.3645	20.2609	1.12593e-08	2.82419e-08
1558747_at	SMCHD1	structural maintenance of chromosomes flexible hinge domain containing 1	23347	1.44536	1.46568	1.68493	1.64947	1.68698	1.14379	1.06186	7.1831	11.1424	3.10255e-06	5.56916e-06
1558750_a_at	---	---	---	1.75808	2.04053	1.7888	1.717	2.17213	1.42326	1.20974	6.26984	20.6577	9.26944e-09	2.3533e-08
1558759_s_at	CLASP2	cytoplasmic linker associated protein 2	23122	2.13567	2.91615	3.25375	2.99944	3.90306	3.35267	3.40987	6.27437	89.9171	9.24804e-16	9.90954e-15
1558761_a_at	FAM120AOS	family with sequence similarity 120A opposite strand	158293	1.25379	1.23041	1.2346	1.29716	1.48827	1.39426	1.37812	6.5964	8.71783	2.42298e-05	3.93304e-05
1558782_a_at	LOC100130557	hypothetical LOC100130557	100130557	1.02	1.31995	1.20689	1.06373	-1.1199	1.04193	1.13502	6.96391	11.261	2.82903e-06	5.10115e-06
1558783_at	---	---	---	1.91043	2.61736	1.88631	1.73791	2.02555	1.3622	1.66857	6.45932	24.468	1.65261e-09	4.75257e-09
1558784_at	---	---	---	1.13382	1.50241	1.35934	1.22335	1.49802	1.69858	1.47751	8.40574	21.1628	7.26892e-09	1.87609e-08
1558791_at	LOC286467	hypothetical LOC286467	286467	1.28664	1.48272	1.53305	-1.04053	-1.10672	-1.18728	-1.36125	6.87491	27.142	5.61826e-10	1.74727e-09
1558792_x_at	AP2A1	Adaptor-related protein complex 2, alpha 1 subunit	160	1.44841	1.82151	1.67605	1.62896	1.98884	1.99918	1.69135	7.33069	12.133	1.46457e-06	2.73812e-06
1558801_at	---	---	---	-1.3523	-1.03971	-1.02253	1.59852	1.88532	1.4063	1.98808	6.40764	32.1704	9.27706e-11	3.3296e-10
1558815_at	SORBS2	sorbin and SH3 domain containing 2	8470	-2.6702	-2.24148	-3.35921	-2.93855	-1.44593	-2.13581	-1.19328	6.50031	70.9537	1.41166e-14	1.12184e-13
1558816_at	ZNF664	zinc finger protein 664	144348	1.01792	1.77385	1.904	2.05667	2.16916	1.57948	2.0007	6.72997	52.1647	4.60483e-13	2.61687e-12
1558820_a_at	C18orf34	chromosome 18 open reading frame 34	374864	-1.01959	1.20962	1.1651	1.0366	1.10901	1.53415	1.13156	7.31364	8.36744	3.36053e-05	5.37018e-05
1558822_at	---	---	---	1.33728	1.59387	1.56007	1.4605	1.90906	1.20249	1.3715	8.36565	15.3528	1.68061e-07	3.5439e-07
1558831_x_at	---	---	---	1.93225	2.62168	2.28604	2.119	2.69678	2.80286	2.17602	7.66728	35.6962	3.02601e-11	1.18473e-10
1558842_at	---	---	---	1.89639	3.26738	2.12888	2.04689	2.36343	1.33651	1.58823	6.40282	32.4427	8.47597e-11	3.06456e-10
1558856_at	DMRTA2	DMRT-like family A2	63950	1.13098	-1.03262	1.43851	2.06069	1.42384	2.2727	1.48795	6.09037	31.9914	9.84828e-11	3.51225e-10
1558922_at	---	---	---	2.89023	5.23853	5.11325	5.63761	7.5403	3.60118	4.61341	7.04824	152.625	1.90646e-18	4.24711e-17
1558924_s_at	CLIP1	CAP-GLY domain containing linker protein 1	6249	1.17821	1.27675	1.58616	1.55038	1.87679	-1.00797	1.48696	7.13705	10.1672	6.81168e-06	1.17607e-05
1558937_s_at	---	---	---	1.38391	2.29948	2.12157	1.78995	1.96377	1.57832	1.75014	6.21454	33.5202	5.96772e-11	2.21847e-10
1558942_at	ZNF765	zinc finger protein 765	91661	1.08511	1.04564	-1.02078	-1.11769	-1.42413	-1.83779	-1.43433	8.55738	17.1762	5.73399e-08	1.29475e-07
1558943_x_at	ZNF765	zinc finger protein 765	91661	1.18956	1.09257	1.04074	-1.03598	-1.29771	-2.25784	-1.80155	8.57756	125.143	1.96615e-17	3.28294e-16
1558953_s_at	CEP164	centrosomal protein 164kDa	22897	1.51087	1.64945	1.97297	2.35844	2.57546	1.86831	1.82183	7.48261	34.3392	4.60105e-11	1.74353e-10
1558954_at	SNORA78	small nucleolar RNA, H/ACA box 78	677844	-1.12787	1.02949	-1.09193	-1.25526	-1.23118	-1.0468	-1.03224	8.02564	7.37497	8.91195e-05	0.000136123
1558956_s_at	IFT80	intraflagellar transport 80 homolog (Chlamydomonas)	57560	1.21084	1.55056	1.31121	1.81593	1.93346	1.41952	1.56695	9.33501	24.9348	1.35931e-09	3.97386e-09
1558964_at	FAT3	FAT tumor suppressor homolog 3 (Drosophila)	120114	1.24667	-1.10161	1.08373	1.24065	1.81219	1.31495	1.52184	6.44354	26.6048	6.92567e-10	2.1178e-09
1559023_a_at	KIAA0494	KIAA0494	9813	1.089	1.37087	1.36937	1.16023	1.36988	1.20015	1.31262	6.48898	10.212	6.56268e-06	1.13489e-05
1559038_at	40788	septin 2	4735	1.10959	1.45106	1.47254	1.15082	1.34346	1.2208	1.01764	7.7324	14.2005	3.49342e-07	7.05183e-07
1559078_at	BCL11A	B-cell CLL/lymphoma 11A (zinc finger protein)	53335	1.67625	1.31694	1.54329	1.42209	2.52355	1.5153	2.06911	7.37076	59.9749	9.56166e-14	6.33478e-13
1559091_s_at	FGD2	FYVE, RhoGEF and PH domain containing 2	221472	-1.18146	-1.1397	-1.19748	-1.23911	-1.32668	-1.18148	-1.08033	8.09533	8.75452	2.34255e-05	3.80892e-05
1559101_at	FYN	FYN oncogene related to SRC, FGR, YES	2534	1.37646	2.16886	2.17572	2.45329	2.68265	1.87426	1.95066	7.74669	47.6518	1.26542e-12	6.52616e-12
1559156_at	---	---	---	2.14117	4.03436	4.39986	3.93613	5.28987	3.00264	3.14293	7.38686	136.787	6.92195e-18	1.3169e-16
1559210_at	---	---	---	1.01093	1.14828	1.08385	-1.04834	1.09969	1.14984	1.17124	7.07685	5.94274	0.000421136	0.00060221
1559214_at	---	---	---	1.89258	3.7756	2.83216	2.90497	2.70246	1.09407	2.12746	6.1345	62.8908	5.58178e-14	3.89089e-13
1559226_x_at	LCE1E	late cornified envelope 1E	353135	-1.10318	1.05798	-1.00807	-1.22616	-1.04	1.03614	1.02372	8.31102	6.88106	0.000149111	0.000222731
1559257_a_at	MAGI1	membrane associated guanylate kinase, WW and PDZ domain containing 1	9223	1.12223	1.18436	1.12259	1.22805	1.39735	1.47688	2.66949	7.0605	66.7066	2.85601e-14	2.12204e-13
1559266_s_at	C10orf140	chromosome 10 open reading frame 140	387640	1.49949	1.8503	1.91679	2.51216	3.45273	2.36595	2.30387	7.46703	92.2967	6.83434e-16	7.53172e-15
1559280_a_at	---	---	---	-1.64485	-5.21813	-12.8116	-24.6275	-26.2858	-42.3912	-165.994	8.76829	1020.3	2.57362e-28	1.80369e-25
1559283_a_at	CNPY1	canopy 1 homolog (zebrafish)	285888	1.11974	1.1191	1.74673	2.16057	2.15854	3.62678	3.37307	5.84258	65.7845	3.34673e-14	2.44876e-13
1559291_at	NCRNA00032	Non-protein coding RNA 32	158035	-1.11045	1.00175	-1.21369	-1.36464	-1.43395	-1.20486	-1.39461	7.30639	7.34148	9.22255e-05	0.00014066
1559332_at	---	---	---	1.22621	1.66208	1.78342	1.83033	2.24395	1.38694	1.77814	6.19906	26.8451	6.30407e-10	1.94308e-09
1559360_at	---	---	---	1.43707	4.10367	3.97049	2.26893	2.49086	1.4289	1.56173	8.37348	148.99	2.53279e-18	5.43241e-17
1559388_a_at	LYNX1	Ly6/neurotoxin 1	66004	-1.18608	-1.08376	-1.14138	-1.33834	-1.24917	-1.07918	-1.08835	7.79105	5.61489	0.000617728	0.000868201
1559391_s_at	---	---	---	2.6902	3.60612	2.96955	2.23328	3.37091	1.27966	1.46468	6.3237	117.619	4.06321e-17	6.2791e-16
1559394_a_at	---	---	---	3.35847	5.16493	3.79378	2.6335	2.43772	1.31893	1.26161	6.99659	102.307	2.06754e-16	2.61274e-15
1559399_s_at	ZCCHC10	zinc finger, CCHC domain containing 10	54819	-1.78393	-2.16959	-2.57619	-2.27853	-3.10226	-2.92022	-3.268	6.7147	33.4817	6.04189e-11	2.24234e-10
1559401_a_at	---	---	---	1.65612	2.09572	2.5503	2.0093	3.44859	1.33015	1.54849	6.1795	27.8961	4.21345e-10	1.33748e-09
1559410_at	---	---	---	5.63636	7.52461	7.10233	4.9587	5.87673	3.31192	1.60061	7.46287	167.52	6.35333e-19	1.6073e-17
1559412_at	C21orf34	chromosome 21 open reading frame 34	388815	-1.00995	1.04463	1.22074	1.67401	2.57117	2.02372	3.16058	6.03201	49.6028	8.08964e-13	4.34312e-12
1559436_x_at	---	---	---	1.71443	2.39017	2.28701	2.24421	2.79231	2.86895	2.27553	9.81495	40.0995	8.51644e-12	3.69916e-11
1559467_at	---	---	---	1.23777	1.51101	1.42361	1.42313	1.45304	1.78475	1.36397	7.47994	18.4398	2.86676e-08	6.75309e-08
1559477_s_at	MEIS1	Meis homeobox 1	4211	1.09548	1.6268	2.29691	3.43104	5.98245	3.75192	5.32358	6.981	189.277	1.49821e-19	4.49133e-18
1559490_at	LRCH3	leucine-rich repeats and calponin homology (CH) domain containing 3	84859	1.36073	2.18083	2.05429	1.9151	2.05233	1.80023	1.76947	6.39961	53.56	3.42433e-13	2.00851e-12
1559491_at	---	---	---	1.3018	1.23166	1.27778	1.17331	1.62847	1.15524	1.08877	6.41099	9.96472	8.07132e-06	1.38114e-05
1559496_at	PPA2	pyrophosphatase (inorganic) 2	27068	1.38558	3.81319	3.40658	3.25337	3.55511	2.38995	2.3662	7.07276	74.1966	8.46227e-15	7.10606e-14
1559658_at	C15orf29	chromosome 15 open reading frame 29	79768	1.14663	1.37738	1.3823	1.08775	1.22902	1.1808	1.18398	6.52616	7.85446	5.51144e-05	8.61829e-05
1559675_at	---	---	---	-1.24858	-1.26794	-1.3278	-1.44671	-1.529	-1.31119	-1.37068	7.10793	10.7268	4.31153e-06	7.60145e-06
1559696_at	---	---	---	-1.30173	-1.48154	-1.6856	-2.06771	-2.06284	-1.56489	-1.73378	8.09749	27.9827	4.07833e-10	1.29745e-09
1559723_s_at	---	---	---	1.22782	1.63281	1.73771	1.37328	1.93617	1.3658	1.31174	6.02057	16.213	1.00007e-07	2.17484e-07
1559776_at	---	---	---	-1.0091	-1.11986	-1.06559	1.16468	1.21697	1.00471	1.07827	6.41831	6.36538	0.000261129	0.000380797
1559822_s_at	LOC644215 /// MTDH	hypothetical LOC644215 /// metadherin	644215 /// 92140	-1.11423	-1.06552	1.09051	1.322	1.29601	1.21527	1.25171	6.86937	12.7899	9.11952e-07	1.74471e-06
1559826_a_at	LOC401074	hypothetical LOC401074	401074	-1.5674	-1.24751	-1.23873	-1.40278	-1.33135	-1.12314	-1.4982	7.13793	10.5426	5.00288e-06	8.75193e-06
1559827_at	LOC401074	hypothetical LOC401074	401074	-4.71674	-3.85729	-3.62694	-3.66242	-4.68119	-4.13305	-6.35325	6.97774	197.157	9.23898e-20	2.96505e-18
1559891_at	HMGA2	high mobility group AT-hook 2	8091	1.22802	1.44117	1.31495	1.03124	1.31023	1.09314	-1.04499	6.58431	14.9686	2.13464e-07	4.43251e-07
1559910_at	---	---	---	-1.03784	1.05008	1.08635	1.18814	1.43265	1.51925	1.72199	6.42403	30.9732	1.3912e-10	4.82804e-10
1559946_s_at	RUVBL2	RuvB-like 2 (E. coli)	10856	1.2436	-1.21482	-1.2297	-1.05703	-1.06369	-1.04562	-1.20314	10.309	16.3926	8.99805e-08	1.97184e-07
1559957_a_at	LOC642852	hypothetical LOC642852	642852	1.27762	1.42134	1.71276	2.83241	2.26181	1.45718	2.06181	6.86739	25.7209	9.85027e-10	2.94271e-09
1559965_at	LOC100192378	hypothetical LOC100192378	100192378	1.06157	1.81568	2.48481	8.9088	11.5672	11.3913	21.2482	6.62893	268.044	2.39517e-21	1.29664e-19
1559966_a_at	LOC100192378	hypothetical LOC100192378	100192378	-1.00943	1.15485	1.25032	1.46793	2.02946	2.26154	3.81879	5.40495	58.7416	1.20954e-13	7.84311e-13
1560019_at	MGC11082	hypothetical LOC84777	84777	1.05167	-1.22716	-1.33023	-2.27815	-1.93154	-1.80113	-2.22712	6.2027	51.5375	5.27325e-13	2.96489e-12
1560031_at	FRMD4A	FERM domain containing 4A	55691	1.55585	2.5327	2.4041	3.44052	4.72259	2.35036	3.14448	6.2055	78.9899	4.12366e-15	3.71932e-14
1560049_at	---	---	---	1.16141	1.20811	1.3668	1.29235	1.93584	1.51244	1.53971	7.68685	34.0434	5.05091e-11	1.89874e-10
1560060_s_at	VPS37C	vacuolar protein sorting 37 homolog C (S. cerevisiae)	55048	1.37604	1.28634	1.37298	1.37865	1.29232	1.18832	1.05566	8.69411	15.3225	1.71227e-07	3.60563e-07
1560081_at	---	---	---	1.12282	1.4121	1.43276	1.43592	1.44946	1.32773	1.32983	6.5709	5.84019	0.000474183	0.000674015
1560082_at	---	---	---	1.50581	1.60347	1.68192	1.37282	1.60334	1.41066	1.35328	6.43284	14.541	2.80114e-07	5.72119e-07
1560091_a_at	PHF21B	PHD finger protein 21B	112885	1.05173	1.02551	1.05493	1.33866	1.89566	1.7285	2.2154	5.9618	32.2664	8.98583e-11	3.23402e-10
1560109_s_at	---	---	---	-1.02261	1.13257	1.21061	1.11804	1.26321	1.3521	1.50884	6.27339	6.8461	0.000154767	0.000230766
1560116_a_at	NEDD1	neural precursor cell expressed, developmentally down-regulated 1	121441	-1.2831	1.33067	1.34463	1.67596	1.44879	1.17425	1.09927	9.78407	36.0312	2.73459e-11	1.07997e-10
1560119_at	LOC389634	hypothetical LOC389634	389634	1.71881	1.76924	1.86854	1.85291	1.79661	1.7154	1.18249	6.34724	27.8012	4.3672e-10	1.38256e-09
1560137_at	---	---	---	-1.00013	1.1793	1.28568	1.24063	1.23731	1.13449	1.09728	6.49983	6.59228	0.000203462	0.000299702
1560145_at	MKLN1	Muskelin 1, intracellular mediator containing kelch motifs	4289	1.69721	2.2111	2.54386	2.17631	2.91705	2.07767	1.912	7.21641	32.7357	7.69699e-11	2.80285e-10
1560199_x_at	LOC728153	similar to FAM133B protein	728153	1.43135	2.28746	2.59481	2.27069	3.19791	2.18436	2.47801	8.47095	113.488	6.17124e-17	9.09758e-16
1560263_at	---	---	---	1.67083	2.01286	1.80553	1.6052	1.76001	1.5601	1.3737	6.85698	22.7464	3.49521e-09	9.5212e-09
1560271_at	---	---	---	3.1489	5.89881	4.19683	4.25746	6.18025	3.46178	4.1435	8.52024	190.633	1.37669e-19	4.16558e-18
1560296_at	---	---	---	1.01443	-1.03043	1.0823	1.16445	1.13196	1.23264	1.17064	7.34107	5.94356	0.000420739	0.000601689
1560339_s_at	NAP1L4	nucleosome assembly protein 1-like 4	4676	1.26457	1.05162	1.03413	1.15434	1.09345	-1.11302	-1.05798	8.70458	6.40942	0.000248689	0.000363453
1560386_at	---	---	---	2.47733	3.40882	3.15794	2.60599	3.2345	1.80189	1.60463	6.85146	47.6297	1.27197e-12	6.55602e-12
1560445_x_at	ARHGEF1	Rho guanine nucleotide exchange factor (GEF) 1	9138	1.11607	1.41234	1.26376	1.21442	1.51829	1.48737	1.33595	7.41297	14.5535	2.77877e-07	5.68003e-07
1560451_at	---	---	---	-1.22804	-1.21383	-1.28824	-1.3885	-1.36334	-1.18717	-1.32117	8.32161	6.78597	0.000165042	0.000245438
1560474_at	---	---	---	1.06102	1.40508	1.32868	1.25313	1.31495	1.36941	1.39063	7.29326	10.0816	7.31607e-06	1.25871e-05
1560509_at	---	---	---	1.24978	1.33548	1.26215	1.11337	1.41207	1.2053	1.13153	6.47528	5.60368	0.000625997	0.000879394
1560512_at	---	---	---	1.36471	1.58456	1.53806	1.11936	1.14792	-1.00432	-1.14855	6.41099	16.0558	1.09779e-07	2.37224e-07
1560537_at	LOC100129662	hypothetical protein LOC100129662	100129662	-2.36707	-2.44675	-2.88211	-3.6133	-3.67185	-3.22093	-3.36264	5.7672	73.123	1.00006e-14	8.24568e-14
1560579_s_at	---	---	---	-1.30373	-1.4318	-1.34464	-1.55704	-1.54602	-1.76248	-1.8578	6.14341	20.3458	1.07978e-08	2.71553e-08
1560587_s_at	PRDX5	peroxiredoxin 5	25824	-1.36173	-1.49992	-1.48762	-1.30327	-1.45136	-1.24643	-1.23204	10.6004	16.848	6.91097e-08	1.54105e-07
1560622_at	---	---	---	1.79907	2.44337	2.25207	1.84926	2.18508	1.52012	1.50968	7.29222	37.6722	1.68514e-11	6.92511e-11
1560652_at	---	---	---	1.31877	2.12234	2.05081	1.41184	-1.42106	-1.01985	-2.46817	7.41543	138.472	5.9941e-18	1.15995e-16
1560659_at	---	---	---	1.86265	3.28008	3.45412	4.13234	4.74857	3.82417	4.26478	7.90593	64.0873	4.50586e-14	3.20729e-13
1560661_x_at	---	---	---	1.5557	2.29435	2.42513	2.54434	3.14062	2.52987	2.82841	7.84956	48.0632	1.14989e-12	5.97788e-12
1560697_at	LOC283392	hypothetical LOC283392	283392	1.03596	1.04653	1.14726	1.24741	1.05009	1.1732	1.25253	6.41415	5.64965	0.00059283	0.000834474
1560741_at	SNRPN	small nuclear ribonucleoprotein polypeptide N	6638	1.74276	1.62234	1.31054	-1.20951	1.01004	-1.36874	-1.18849	8.19008	74.6996	7.83147e-15	6.62139e-14
1560853_x_at	ZNF826	zinc finger protein 826	664701	-1.60786	-1.14932	-1.24401	-1.2489	-1.30596	-1.26477	-1.10508	7.09937	17.062	6.11689e-08	1.37497e-07
1560916_a_at	DPY19L1	dpy-19-like 1 (C. elegans)	23333	-1.24813	-1.04319	1.10158	-1.05048	-1.31437	-1.39982	-1.36914	6.606	16.4013	8.95218e-08	1.96212e-07
1560926_at	---	---	---	1.88683	3.51435	2.94839	2.59081	2.92151	1.32045	1.90546	7.16878	44.9128	2.44177e-12	1.18795e-11
1560928_at	LOC151657	hypothetical protein LOC151657	151657	-1.0766	-1.01667	-1.12063	-1.20061	-1.1134	1.09793	1.03168	7.63124	5.61928	0.000614525	0.000863839
1561060_at	---	---	---	1.02372	1.15731	-1.01945	-1.2217	-1.10124	1.15011	-1.0414	6.39876	7.85519	5.50749e-05	8.61471e-05
1561101_at	LOC153469	hypothetical protein LOC153469	153469	-1.1152	-1.41416	-2.44817	-5.7661	-6.41919	-5.48008	-5.41384	6.80334	121.734	2.71734e-17	4.36035e-16
1561135_at	---	---	---	1.20801	1.45429	1.67468	1.78178	2.75173	2.31485	2.38403	7.16016	48.4495	1.05176e-12	5.50864e-12
1561190_at	CDKL3	cyclin-dependent kinase-like 3	51265	1.40198	2.03995	1.96922	1.87207	2.47579	1.85279	1.91301	6.25227	33.5762	5.86152e-11	2.18196e-10
1561195_at	---	---	---	1.97069	2.3428	2.15779	1.54293	2.53626	1.31584	1.63656	6.68833	38.2073	1.44496e-11	6.01818e-11
1561306_s_at	STRC	stereocilin	161497	1.09025	1.18234	1.1117	1.08497	1.20443	1.26291	1.36586	6.90541	5.79926	0.000497327	0.000705442
1561341_at	---	---	---	1.2553	1.61002	1.17136	-1.62563	-1.42467	-1.63933	1.1058	6.53722	58.3715	1.29912e-13	8.36539e-13
1561346_at	---	---	---	1.50549	2.38525	1.99857	1.75063	2.66379	3.24645	2.39712	10.0299	20.3378	1.08405e-08	2.72522e-08
1561449_at	TSPAN18	tetraspanin 18	90139	-1.11063	1.08799	1.01962	-1.10918	-1.13332	1.03825	1.05268	6.80577	5.75367	0.000524544	0.00074206
1561455_at	LOC284294	hypothetical protein LOC284294	284294	1.05146	1.26889	1.18186	-1.04425	-1.0063	1.17227	1.01833	6.51828	6.02078	0.000385052	0.000552806
1561642_at	---	---	---	2.23051	2.83603	2.07278	1.99503	2.97615	1.75157	3.24792	6.27419	29.6466	2.21572e-10	7.40801e-10
1561689_at	---	---	---	1.06324	1.27108	1.53202	1.30139	1.60405	1.34728	1.11341	6.38527	21.0825	7.55302e-09	1.94573e-08
1561690_at	---	---	---	1.26561	1.91842	2.17462	1.81706	2.55244	1.84416	2.1674	6.90169	43.4967	3.48023e-12	1.64233e-11
1561909_at	---	---	---	1.42265	1.78035	1.61258	1.6504	1.87279	1.67125	1.63225	6.31727	24.3176	1.76119e-09	5.04356e-09
1561915_at	---	---	---	-1.03375	1.03229	-1.05259	-1.12475	1.00252	1.16336	1.07144	6.73383	5.95703	0.000414265	0.000592843
1561951_at	SLC5A12	solute carrier family 5 (sodium/glucose cotransporter), member 12	159963	-1.01832	-1.0642	1.0667	1.2046	-1.02096	1.66201	6.26914	4.5811	201.93	6.95679e-20	2.32171e-18
1562013_a_at	---	---	---	1.52549	1.47996	1.50499	2.00053	2.48477	1.84847	1.83472	7.04761	43.4727	3.5015e-12	1.65026e-11
1562062_at	KIAA1245 /// NBPF1 /// NBPF10 /// NBPF11 /// NBPF20 /// NBPF3 /// NBPF8 /// NBPF9 /// RP11-94I2.2	KIAA1245 /// neuroblastoma breakpoint family, member 1 /// neuroblastoma breakpoint family, member 10 /// neuroblastoma breakpoint family, member 11 /// neuroblastoma breakpoint family, member 20 /// neuroblastoma breakpoint family, member 3 /// neuroblastoma breakpoint family, member 8 /// neuroblastoma breakpoint family, member 9 /// neuroblastoma breakpoint family, member 11-like	100132406 /// 149013 /// 200030 /// 400818 /// 440670 /// 55672 /// 728841 /// 728912 /// 84224	1.50444	2.3879	2.39514	2.41631	3.09138	2.6665	2.23661	8.11105	127.619	1.56278e-17	2.67312e-16
1562063_x_at	KIAA1245 /// NBPF1 /// NBPF10 /// NBPF11 /// NBPF20 /// NBPF3 /// NBPF8 /// NBPF9 /// RP11-94I2.2	KIAA1245 /// neuroblastoma breakpoint family, member 1 /// neuroblastoma breakpoint family, member 10 /// neuroblastoma breakpoint family, member 11 /// neuroblastoma breakpoint family, member 20 /// neuroblastoma breakpoint family, member 3 /// neuroblastoma breakpoint family, member 8 /// neuroblastoma breakpoint family, member 9 /// neuroblastoma breakpoint family, member 11-like	100132406 /// 149013 /// 200030 /// 400818 /// 440670 /// 55672 /// 728841 /// 728912 /// 84224	1.57686	2.40407	2.51742	2.43956	2.91133	2.50002	2.05195	8.30187	136.488	7.10204e-18	1.34622e-16
1562169_at	---	---	---	2.8198	4.85187	3.80554	3.74133	4.83444	3.88977	3.78961	6.71352	68.2826	2.18832e-14	1.66997e-13
1562194_at	---	---	---	1.03682	2.18561	2.46213	2.54254	2.85851	1.80879	1.98121	6.62522	58.9113	1.17072e-13	7.61044e-13
1562220_at	---	---	---	1.05461	1.05567	-1.00354	-1.20601	-1.19008	-1.02339	-1.03989	7.29451	7.25059	0.000101257	0.00015373
1562235_s_at	---	---	---	4.83099	6.01705	6.21257	6.16751	9.06077	3.49535	5.01229	7.40978	141.899	4.4967e-18	8.97643e-17
1562263_at	---	---	---	-1.00868	1.12993	1.06071	-1.12519	1.00865	1.17528	1.07157	7.44108	6.43758	0.000241071	0.000352718
1562275_at	---	---	---	1.03057	2.05482	3.69384	7.91398	3.96331	3.78694	2.06088	7.87225	238.928	9.42315e-21	4.19848e-19
1562280_at	---	---	---	2.29147	3.36652	3.03357	2.04984	3.36232	1.37497	1.83665	6.34338	60.6222	8.46721e-14	5.67054e-13
1562289_at	---	---	---	-1.46073	-1.37811	-1.45478	-1.58689	-1.64514	-1.58224	-1.55399	6.36976	22.3881	4.10929e-09	1.10595e-08
1562309_s_at	PHF21B	PHD finger protein 21B	112885	1.59344	1.40608	1.46402	2.42171	4.48971	3.47233	5.3701	8.05381	189.341	1.49218e-19	4.47844e-18
1562326_at	FLJ30838	hypothetical gene supported by AL832565	400955	1.0205	1.13084	1.16246	-1.17362	1.05507	1.25285	1.25886	6.41572	7.33963	9.24006e-05	0.000140902
1562391_at	B3GALNT2	beta-1,3-N-acetylgalactosaminyltransferase 2	148789	1.65845	2.36151	2.01493	1.77103	1.85228	1.55652	1.50573	6.13463	25.7309	9.81052e-10	2.93151e-09
1562403_a_at	SLC8A3	solute carrier family 8 (sodium/calcium exchanger), member 3	6547	1.00363	1.07634	1.1284	-1.01046	1.13269	1.25777	1.3571	7.00854	7.05957	0.000123503	0.000185936
1562428_at	LOC654780	SFPQ	654780	1.24068	1.35313	1.34548	1.25153	1.43473	1.39951	1.29694	7.17911	11.5145	2.32773e-06	4.2367e-06
1562474_at	---	---	---	1.21628	1.45819	1.50095	1.29145	1.56697	1.22334	1.13946	6.70081	12.3586	1.24211e-06	2.34028e-06
1562544_at	---	---	---	1.43224	1.80546	2.04903	1.74199	1.71251	1.25172	1.27127	6.33973	20.7396	8.90851e-09	2.26877e-08
1562633_at	RMST	rhabdomyosarcoma 2 associated transcript (non-protein coding)	196475	1.0044	1.15781	1.09883	1.02626	1.04808	1.48246	1.15436	6.21011	6.32333	0.000273632	0.00039829
1562664_at	tcag7.929	hypothetical protein LOC286009	286009	1.17494	1.30878	1.35835	1.27554	1.38254	1.6711	1.44166	6.9882	16.3395	9.28246e-08	2.02971e-07
1562736_at	LHX9	LIM homeobox 9	56956	1.01971	1.38345	1.50155	5.29574	6.21049	2.0758	8.92422	5.29561	204.711	5.91459e-20	2.0368e-18
1562828_at	---	---	---	1.80825	2.00626	1.45381	-1.60527	-1.41989	-1.89582	1.44656	7.82934	82.1109	2.63959e-15	2.50447e-14
1562836_at	---	---	---	1.87717	1.38657	1.43477	1.08097	1.12165	-1.08091	-1.01493	6.49341	27.2351	5.42025e-10	1.69076e-09
1562946_at	---	---	---	1.15932	1.4017	1.27081	1.2479	1.4531	1.37104	1.29128	6.69081	9.33075	1.39453e-05	2.32266e-05
1562981_at	HBB	Hemoglobin, beta	3043	1.03624	1.05072	1.0648	-1.13745	-1.02494	1.18377	1.08895	7.83946	5.90727	0.000438723	0.000626599
1563022_at	LOC347475	UPF0625 coiled-coil domain-containing protein ENSP00000359845	347475	1.10745	2.05952	1.89616	1.81283	1.34974	-1.15526	1.18497	6.97991	59.8374	9.81329e-14	6.48502e-13
1563111_a_at	PIGX	phosphatidylinositol glycan anchor biosynthesis, class X	54965	-1.22305	-1.39275	-1.14822	-1.09523	-1.15353	-1.30384	-1.24266	7.73059	6.47344	0.000231731	0.000339646
1563210_at	---	---	---	1.01528	1.30135	1.20379	1.11863	1.20585	1.24068	1.21319	7.5681	7.28694	9.7535e-05	0.000148322
1563217_at	---	---	---	1.27873	3.06059	3.78465	5.14552	4.76052	3.27205	4.67175	6.76715	264.22	2.84267e-21	1.50129e-19
1563315_s_at	ERICH1	glutamate-rich 1	157697	1.1963	-1.01336	-1.02746	-1.10572	-1.16902	-1.22622	-1.33204	7.92847	13.2554	6.58884e-07	1.28356e-06
1563357_at	---	---	---	1.56159	-1.67778	-1.71372	-1.35993	-1.62718	1.05769	-2.15007	7.54509	49.6935	7.92629e-13	4.26779e-12
1563414_at	---	---	---	1.86422	2.48444	3.05678	2.64409	4.36065	2.0994	2.56037	6.93501	108.347	1.06004e-16	1.45362e-15
1563445_x_at	CTSLL3	cathepsin L-like 3	1518	-1.4692	-1.76994	-1.27448	1.06934	-1.2532	1.03094	-1.12632	6.17396	17.0924	6.01263e-08	1.3533e-07
1563455_at	KIAA0999	KIAA0999 protein	23387	1.22468	1.80075	1.73637	1.35043	1.63122	1.7132	1.42274	6.6819	18.0268	3.58029e-08	8.31754e-08
1563467_at	---	---	---	-1.01054	1.92565	2.56725	2.96751	4.86739	2.33181	2.44804	6.1503	152.366	1.94511e-18	4.32579e-17
1563469_at	---	---	---	-1.00329	1.17498	1.15551	1.16976	1.26618	1.31044	1.349	6.81971	13.1597	7.03907e-07	1.36706e-06
1563485_at	---	---	---	-1.13037	-1.06147	-1.12485	-1.31217	-1.23994	1.01146	-1.08104	8.07269	5.66879	0.000579583	0.000816448
1563494_at	---	---	---	2.27835	3.04444	3.05764	2.55041	3.80996	1.99012	4.304	6.44413	56.2128	1.98767e-13	1.22749e-12
1563497_at	USP25	ubiquitin specific peptidase 25	29761	1.11605	1.43206	1.47695	1.23386	1.4378	1.12524	1.14142	6.58674	8.53909	2.85993e-05	4.60598e-05
1563505_at	DUSP16	Dual specificity phosphatase 16	80824	1.15345	1.27062	1.21896	1.1145	1.26652	1.26667	1.26645	7.32122	8.16884	4.06061e-05	6.43734e-05
1563632_at	LOC220980	hypothetical protein LOC220980	220980	1.00277	1.0976	1.05273	-1.05616	-1.13622	1.15983	1.11196	6.83753	5.89272	0.000446164	0.000636455
1563668_at	MORN1	MORN repeat containing 1	79906	1.02045	1.09298	-1.00456	-1.16336	-1.21229	1.01476	-1.09147	6.73279	7.39437	8.73728e-05	0.000133612
1563706_at	---	---	---	1.0324	1.13136	1.07334	-1.124	1.02183	1.18578	1.15174	6.54049	7.89645	5.28879e-05	8.28162e-05
1563796_s_at	EARS2	glutamyl-tRNA synthetase 2, mitochondrial (putative)	124454	1.00932	-1.42017	-1.88505	-1.82794	-2.14019	-2.2482	-2.45955	7.29753	64.5314	4.1656e-14	2.98805e-13
1563841_at	---	---	---	1.10992	1.76571	2.02414	2.08222	3.41536	2.01385	2.82181	6.64207	72.8443	1.04477e-14	8.56256e-14
1563881_at	---	---	---	3.98505	4.6315	3.95807	3.63491	6.51475	4.05785	6.28412	6.48606	114.523	5.55024e-17	8.30486e-16
1564002_a_at	AKD2	adenylate kinase domain containing 2	221264	1.00628	1.1671	1.18586	1.19165	1.23211	1.1772	1.67603	6.28341	14.9506	2.15892e-07	4.47972e-07
1564021_at	LOC100130456	hypothetical LOC100130456	100130456	-1.0273	-1.06466	-1.07162	-1.32238	-1.22604	-1.05056	-1.17619	6.75532	5.53982	0.000675433	0.000945256
1564039_at	ZSCAN23	zinc finger and SCAN domain containing 23	222696	1.03849	1.24394	1.24778	1.20969	1.38452	1.25379	1.24407	6.43878	6.23524	0.000301969	0.000437671
1564063_a_at	ATP11B	ATPase, class VI, type 11B	23200	-1.20442	-1.28952	-1.38177	-1.71174	-1.52315	-1.55618	-1.51123	6.11531	19.0999	2.02606e-08	4.88495e-08
1564139_at	LOC144571	hypothetical protein LOC144571	144571	1.06444	1.52027	1.60043	2.38762	2.55835	2.35314	2.77477	6.26945	94.0652	5.48476e-16	6.17834e-15
1564154_at	---	---	---	1.28138	1.40016	1.16124	-1.15784	-1.20168	1.0034	-1.1886	7.98496	23.6646	2.33077e-09	6.5375e-09
1564155_x_at	---	---	---	1.2677	1.37204	1.33387	-1.12874	-1.08433	1.03134	-1.13857	8.30517	11.457	2.43239e-06	4.41665e-06
1564359_a_at	LOC339260	Hypothetical protein LOC339260	339260	-1.13295	-1.04533	-1.21271	-1.41013	-1.42963	-1.78328	-2.82114	6.56284	46.0034	1.87144e-12	9.31264e-12
1564360_a_at	LOC339260	Hypothetical protein LOC339260	339260	-1.27891	-1.20337	-1.67894	-1.88936	-1.99788	-2.08958	-3.10811	6.0869	65.656	3.42212e-14	2.49407e-13
1564378_a_at	---	---	---	2.80209	3.49053	5.3088	4.37371	6.40746	3.04272	2.4306	7.81314	129.879	1.27202e-17	2.24989e-16
1564413_at	FLJ36116	hypothetical locus LOC388666	388666	-1.24492	-1.0147	1.06042	-1.76748	-1.45848	-1.40684	-3.51355	7.95869	154.648	1.63237e-18	3.70982e-17
1564467_at	FAM161A	family with sequence similarity 161, member A	84140	1.42841	1.52821	1.42708	1.30123	1.32941	1.0191	1.12104	6.32666	11.6367	2.1212e-06	3.88177e-06
1564520_s_at	PRMT5	protein arginine methyltransferase 5	10419	1.1471	-1.21657	-1.22209	-1.28449	-1.22568	-1.43002	-1.53539	9.23652	12.9347	8.23507e-07	1.58415e-06
1564521_x_at	PRMT5	protein arginine methyltransferase 5	10419	1.11694	-1.08394	-1.01481	-1.10968	-1.08346	-1.14003	-1.24958	9.21488	10.9358	3.6499e-06	6.48651e-06
1564733_at	---	---	---	1.12365	1.356	1.27459	1.24583	1.51609	1.58337	1.75101	6.42009	12.3042	1.29216e-06	2.42928e-06
1564746_at	NHEDC2	Na+/H+ exchanger domain containing 2	133308	1.05282	1.11644	-1.00635	-1.06088	1.12089	1.17594	1.34231	6.3682	6.64022	0.00019313	0.000285148
1564753_at	---	---	---	1.41695	1.86172	2.13801	1.80629	2.31635	1.47231	1.57966	6.40431	16.7689	7.23247e-08	1.60817e-07
1564798_at	---	---	---	1.10469	1.38383	1.20562	1.04305	1.24641	1.32954	1.22359	7.40584	5.75896	0.000521304	0.000737718
1564837_at	LOC151760	hypothetical LOC151760	151760	-5.10184	-6.15246	-6.24289	-5.39904	-5.44815	-6.80363	-5.26062	6.29613	168.583	5.89593e-19	1.5058e-17
1564838_a_at	LOC151760	hypothetical LOC151760	151760	-5.38915	-5.84134	-5.65777	-6.21469	-5.44133	-6.69339	-5.4687	7.49602	219.383	2.5999e-20	1.00774e-18
1564907_s_at	MATR3 /// SNHG4	matrin 3 /// small nucleolar RNA host gene 4 (non-protein coding)	724102 /// 9782	-1.04396	-1.08316	-1.0949	-1.35694	-1.40034	-1.31268	-1.33312	8.01564	14.9877	2.10912e-07	4.38305e-07
1565149_at	DYNC2H1	dynein, cytoplasmic 2, heavy chain 1	79659	1.15461	1.80554	1.83879	1.43599	1.68713	1.56795	1.35833	6.34211	32.1399	9.37189e-11	3.35898e-10
1565162_s_at	MGST1	microsomal glutathione S-transferase 1	4257	-1.19232	-1.45316	-1.9725	-2.77733	-3.65095	-3.78164	-5.12599	10.6829	193.804	1.13222e-19	3.52033e-18
1565269_s_at	ATF1	activating transcription factor 1	466	-1.20099	-1.29466	-1.11954	-1.13445	-1.41627	-1.61466	-1.89867	6.54371	9.73265	9.83276e-06	1.66464e-05
1565483_at	EGFR	epidermal growth factor receptor (erythroblastic leukemia viral (v-erb-b) oncogene homolog, avian)	1956	-1.17842	-1.13125	-1.08433	-1.46343	-1.22663	1.06057	-1.04305	7.06806	8.7802	2.28796e-05	3.72459e-05
1565558_at	---	---	---	1.20383	1.31367	1.32598	1.32363	1.44677	1.51241	1.26751	8.02441	16.5343	8.28359e-08	1.82515e-07
1565567_at	---	---	---	1.10613	1.49432	1.38167	1.42104	1.48818	1.46732	1.53869	6.44702	14.3234	3.22426e-07	6.53241e-07
1565620_at	AGAP4	ArfGAP with GTPase domain, ankyrin repeat and PH domain 4	119016	1.98065	3.00857	3.05424	2.76225	3.52045	2.46367	2.15285	6.62283	82.1844	2.6125e-15	2.48513e-14
1565659_at	FUT6	Fucosyltransferase 6 (alpha (1,3) fucosyltransferase)	2528	1.09713	1.11509	-1.07253	-1.15143	-1.06433	1.13329	-1.01128	6.65067	6.06081	0.00036785	0.0005289
1565689_at	---	---	---	1.50502	2.64615	3.18488	3.01142	3.97461	1.76108	2.44703	5.91379	65.637	3.43341e-14	2.50089e-13
1565701_at	---	---	---	1.06049	1.34888	1.42507	1.3146	1.73026	1.33357	1.29724	6.88413	21.8769	5.19632e-09	1.37496e-08
1565703_at	SMAD4	SMAD family member 4	4089	1.40927	2.11991	1.98066	1.88216	2.13075	1.40751	1.75433	6.36279	25.0594	1.29091e-09	3.78629e-09
1565717_s_at	FUS /// NR1H3	fusion (involved in t(12;16) in malignant liposarcoma) /// nuclear receptor subfamily 1, group H, member 3	10062 /// 2521	2.48441	2.54989	2.37521	2.58975	2.87858	1.89243	1.5751	8.61732	41.776	5.43096e-12	2.45467e-11
1565752_at	FGD2	FYVE, RhoGEF and PH domain containing 2	221472	-1.0259	-1.00482	1.08614	1.04161	1.10135	1.31527	1.28363	8.29539	6.25434	0.000295569	0.00042885
1565754_x_at	FGD2	FYVE, RhoGEF and PH domain containing 2	221472	-1.00942	1.06439	1.05289	1.00545	1.08079	1.21432	1.23022	7.63941	7.0249	0.000128079	0.000192535
1565756_a_at	MAP1D	methionine aminopeptidase 1D	254042	1.05386	1.2524	1.30227	1.1159	1.1384	1.1276	1.10243	6.76328	5.67065	0.000578308	0.000814695
1565786_x_at	FLJ45482	hypothetical LOC645566	645566	1.89062	2.65165	2.34589	1.78171	2.12688	-1.05845	1.04477	7.42221	64.6214	4.10005e-14	2.94511e-13
1565817_at	IKZF1	IKAROS family zinc finger 1 (Ikaros)	10320	1.09784	-1.04092	1.16316	-1.15629	-1.24243	-1.25632	-1.37199	7.29484	6.96131	0.000136954	0.000205316
1565829_at	KIAA1731	KIAA1731	85459	1.24476	1.67695	1.78676	1.6953	1.71834	1.78764	1.80583	7.25683	16.6889	7.57384e-08	1.67832e-07
1565886_at	---	---	---	1.48121	3.23307	3.20707	3.68531	2.72135	1.69156	1.77652	6.76062	105.711	1.41253e-16	1.86025e-15
1565951_s_at	CHML	choroideremia-like (Rab escort protein 2)	1122	1.52318	1.0189	-1.38677	-1.4678	-1.41006	-2.13436	-1.99837	6.83518	64.4925	4.19423e-14	3.00776e-13
1566079_at	RPS16P5	ribosomal protein S16 pseudogene 5	647190	1.15943	1.61649	1.42657	1.46813	1.57605	1.57725	1.49144	7.23855	22.2489	4.37845e-09	1.17267e-08
1566152_a_at	CLP1	CLP1, cleavage and polyadenylation factor I subunit, homolog (S. cerevisiae)	10978	1.48088	1.68654	1.53447	1.722	1.92005	1.50348	1.4576	6.3643	9.07466	1.75141e-05	2.88703e-05
1566163_at	---	---	---	-1.0004	5.4209	6.4985	8.46828	15.6165	7.791	12.783	6.9965	261.433	3.2257e-21	1.6677e-19
1566342_at	SOD2	Superoxide dismutase 2, mitochondrial	6648	-1.13067	-1.60515	-1.71253	-1.31618	-1.34257	-1.4573	-1.24165	6.61889	11.0468	3.34402e-06	5.97573e-06
1566480_x_at	FLJ35848	Hypothetical protein FLJ35848	284071	1.42064	1.96459	1.75993	1.78826	1.99068	2.14213	1.57975	7.68253	18.6317	2.58896e-08	6.14389e-08
1566491_at	---	---	---	4.10844	6.58396	7.33761	4.34593	6.48867	3.62777	2.37443	6.21027	176.984	3.3176e-19	9.126e-18
1566509_s_at	FBXO9	F-box protein 9	26268	-1.04764	-1.24116	-1.28266	-1.15167	-1.31435	-1.3621	-1.40813	8.81602	10.7057	4.38528e-06	7.72256e-06
1566528_at	---	---	---	1.20742	1.23121	1.24516	1.1911	1.45761	1.29922	1.55702	6.41765	6.08713	0.000356988	0.000513939
1566557_at	FLJ90757	hypothetical LOC440465	440465	1.35027	1.10546	1.49037	2.35227	2.99893	2.38289	2.5676	6.54902	56.6218	1.83167e-13	1.13902e-12
1566558_x_at	FLJ90757	hypothetical LOC440465	440465	1.22264	1.12409	1.42381	1.66873	2.17727	1.86137	2.12798	6.38742	35.2375	3.48089e-11	1.34801e-10
1566646_at	LOC149086	hypothetical protein LOC149086	149086	-1.04664	-1.10805	-1.17134	-1.36396	-1.28141	-1.21809	-1.11972	6.86037	7.17052	0.000110006	0.000166379
1566785_x_at	LOC728806	Similar to Vesicle-fusing ATPase (Vesicular-fusion protein NSF) (N-ethylmaleimide sensitive fusion protein) (NEM-sensitive fusion protein)	728806	1.35399	1.89342	1.71883	1.8877	2.12391	1.63845	1.69214	6.90687	26.7288	6.59697e-10	2.02637e-09
1566848_x_at	---	---	---	1.25304	1.74563	1.34903	1.40037	1.68119	1.68277	1.42484	7.97491	7.54131	7.52789e-05	0.000116001
1566880_at	---	---	---	1.06451	1.2054	1.28503	1.21957	1.67891	1.35316	1.3754	6.47065	11.6574	2.08816e-06	3.82617e-06
1566887_x_at	---	---	---	1.73927	2.45819	1.91831	1.96371	2.52272	2.99242	2.03839	10.7336	32.2328	9.08648e-11	3.26798e-10
1566968_at	---	---	---	1.01897	-1.13953	-1.13915	-1.77606	-1.56847	-1.65777	-2.10129	7.08568	24.9488	1.35145e-09	3.95269e-09
1566989_at	ARID1B	AT rich interactive domain 1B (SWI1-like)	57492	-1.20679	-1.09717	-1.13353	-1.35729	-1.45159	-1.19994	-1.32202	8.48531	7.47857	8.02058e-05	0.000123212
1566990_x_at	ARID1B	AT rich interactive domain 1B (SWI1-like)	57492	-1.38207	-1.35031	-1.41687	-1.5364	-1.55568	-1.3911	-1.48065	8.62806	11.8682	1.78208e-06	3.29608e-06
1567028_s_at	SH3GLP2	SH3-domain GRB2-like pseudogene 2	6459	-1.00048	1.36246	1.26311	1.05114	1.18473	1.20693	1.24405	6.92422	5.9709	0.000407714	0.000583821
1567045_at	---	---	---	1.2674	1.49739	1.42836	1.31562	1.31463	1.29543	1.15914	6.58097	5.81614	0.000487641	0.000692309
1567080_s_at	CLN6	ceroid-lipofuscinosis, neuronal 6, late infantile, variant	54982	1.2521	1.12664	1.00105	-1.04453	-1.11975	-1.08796	-1.16936	7.77206	5.67491	0.000575412	0.000810749
1567081_x_at	CLN6	ceroid-lipofuscinosis, neuronal 6, late infantile, variant	54982	1.10638	1.00349	-1.12158	-1.25552	-1.25696	-1.14265	-1.18421	7.78675	6.02186	0.000384578	0.000552186
1567101_at	---	---	---	1.0615	1.44177	1.78221	2.07893	3.04315	1.48016	2.9665	6.51678	48.2412	1.10349e-12	5.75862e-12
1567107_s_at	TPM4	tropomyosin 4	7171	-1.30462	-1.43595	-1.61615	-1.70561	-2.0508	-2.2303	-3.82099	8.08779	51.1574	5.72905e-13	3.19278e-12
1567213_at	PNN	pinin, desmosome associated protein	5411	1.29878	1.2929	1.26909	1.12195	1.11445	-1.06403	-1.06229	7.34452	8.22732	3.83942e-05	6.10012e-05
1567214_a_at	PNN	pinin, desmosome associated protein	5411	1.71303	1.89445	1.76056	1.66864	1.7264	1.22255	1.1094	10.0571	18.6154	2.61135e-08	6.19201e-08
1567224_at	HMGA2	high mobility group AT-hook 2	8091	1.45412	2.454	2.40241	1.35718	1.68247	1.09229	-1.09448	6.23716	40.9294	6.80201e-12	3.01561e-11
1567375_at	---	---	---	-1.05595	-1.08959	-1.18661	-1.13303	-1.23752	-1.06916	-1.11519	6.64275	5.52136	0.000690495	0.000965554
1567458_s_at	RAC1	ras-related C3 botulinum toxin substrate 1 (rho family, small GTP binding protein Rac1)	5879	1.10947	-1.38382	-1.43534	-1.14222	-1.21646	-1.17282	-1.60815	9.55106	10.5026	5.16803e-06	9.03168e-06
1567622_at	ABLIM2	Actin binding LIM protein family, member 2	84448	1.18661	1.22446	1.18106	1.03404	1.05571	1.25826	1.14507	7.24143	6.26839	0.00029095	0.000422574
1567623_at	ABLIM2	Actin binding LIM protein family, member 2	84448	-1.08867	-1.03102	-1.00956	-1.34722	-1.05216	-1.00016	-1.04078	6.78854	7.13734	0.000113868	0.000172009
1568574_x_at	SPP1	Secreted phosphoprotein 1	6696	-9.30306	-9.62615	-11.7509	-10.1982	-12.2763	-12.3673	-13.0656	4.23019	428.468	8.77208e-24	1.09888e-21
1568592_at	TRIM69	tripartite motif-containing 69	140691	-1.64213	-1.82231	-1.78156	-1.54906	-1.28813	-1.3059	1.0823	7.12417	40.9712	6.7261e-12	2.984e-11
1568594_s_at	TRIM52	tripartite motif-containing 52	84851	1.08918	1.37075	1.24139	1.30452	1.38337	1.20949	1.55817	6.30849	7.71578	6.3215e-05	9.82351e-05
1568596_a_at	TROAP	trophinin associated protein (tastin)	10024	-1.26325	-1.29307	-1.30626	-1.33691	-1.53457	-1.40687	-1.62323	8.07409	12.2631	1.33141e-06	2.49836e-06
1568597_at	LOC646762	hypothetical LOC646762	646762	1.33803	1.59267	2.23039	4.70262	3.21721	5.9484	5.36259	7.52644	263.324	2.96022e-21	1.55074e-19
1568604_a_at	CADPS	Ca++-dependent secretion activator	8618	1.37757	1.29367	1.58659	2.08488	2.25414	2.16271	3.83168	7.34043	106.867	1.24436e-16	1.66843e-15
1568605_at	JRK	jerky homolog (mouse)	8629	1.40176	1.35033	1.33596	1.46136	1.50788	1.37651	1.43929	6.55251	8.58432	2.74185e-05	4.4246e-05
1568609_s_at	FAM91A2 /// FLJ39739 /// LOC100286793 /// LOC728855 /// LOC728875	family with sequence similarity 91, member A2 /// hypothetical FLJ39739 /// hypothetical LOC100286793 /// hypothetical LOC728855 /// hypothetical LOC728875	100286793 /// 388685 /// 57234 /// 728855 /// 728875	-1.82926	-2.95504	-2.51534	-2.5239	-2.92599	-2.1068	-3.56834	7.77028	43.5311	3.44998e-12	1.62924e-11
1568611_at	---	---	---	-1.00348	-1.11686	-1.11346	1.1995	1.09169	1.6718	1.12271	6.06214	13.3237	6.28648e-07	1.22789e-06
1568612_at	GABRG2	gamma-aminobutyric acid (GABA) A receptor, gamma 2	2566	-1.03202	-1.06236	-1.05072	1.01849	1.16554	1.6111	8.08721	4.60253	182.864	2.25352e-19	6.54378e-18
1568619_s_at	ITPRIPL2	inositol 1,4,5-triphosphate receptor interacting protein-like 2	162073	-1.0224	1.04693	1.30734	1.98207	1.70119	1.44253	1.22813	6.19344	59.4169	1.06285e-13	6.9792e-13
1568629_s_at	PIK3R2	phosphoinositide-3-kinase, regulatory subunit 2 (beta)	5296	1.34539	1.00382	1.18759	1.23721	1.23758	1.30618	1.20288	9.1064	9.93371	8.28561e-06	1.41584e-05
1568649_at	---	---	---	-1.11131	-1.12284	-1.16925	-1.26212	-1.30829	1.0015	-1.09349	8.25102	5.87771	0.000453984	0.000646862
1568658_at	C2orf74	chromosome 2 open reading frame 74	339804	-1.09562	1.04046	1.0191	1.11423	-1.06858	-1.39938	-1.08088	7.35106	6.25842	0.000294221	0.000427013
1568678_s_at	FGFR1OP	FGFR1 oncogene partner	11116	-1.06099	1.03697	-1.00883	-1.40168	-1.45004	-2.08055	-2.08092	8.69778	62.0905	6.45515e-14	4.43648e-13
1568702_a_at	PAAF1	proteasomal ATPase-associated factor 1	80227	1.3575	2.18492	1.85993	1.87742	2.19928	2.10465	1.91215	7.58237	28.4234	3.45941e-10	1.11533e-09
1568736_s_at	---	---	---	1.75769	2.52962	1.66667	1.39005	1.65833	1.00218	-1.08934	5.71409	30.5789	1.59465e-10	5.47333e-10
1568752_s_at	RGS13	regulator of G-protein signaling 13	6003	-1.00779	4.82236	10.0681	25.2377	7.14643	6.58548	2.97821	6.56413	308.265	4.5154e-22	2.98696e-20
1568780_at	LOC649305	hypothetical LOC649305	649305	3.55477	3.43723	3.38027	2.38426	2.48214	1.52476	-1.48555	8.08553	143.945	3.79969e-18	7.72177e-17
1568801_at	C15orf44	chromosome 15 open reading frame 44	81556	1.01241	1.42435	1.33499	1.00345	1.11866	1.03778	1.00051	6.39227	6.74667	0.000172154	0.000255531
1568815_a_at	DDX50	DEAD (Asp-Glu-Ala-Asp) box polypeptide 50	79009	1.43409	2.23264	2.16754	1.99799	2.44539	1.54052	1.80922	6.91937	37.7322	1.65621e-11	6.82024e-11
1568834_s_at	CCDC90B	coiled-coil domain containing 90B	60492	1.06588	1.68953	1.79069	1.71076	1.97035	1.49309	1.63559	7.34734	48.4361	1.05501e-12	5.52343e-12
1568868_at	CYP27C1	cytochrome P450, family 27, subfamily C, polypeptide 1	339761	1.73087	2.6714	2.61229	3.07786	3.41432	1.74567	1.52659	6.21303	71.6362	1.26522e-14	1.01637e-13
1568873_at	ZNF519	zinc finger protein 519	162655	1.93797	2.59655	2.14809	1.71639	2.02288	1.22264	1.40917	6.38243	47.9008	1.19406e-12	6.17779e-12
1568877_a_at	ACBD5	acyl-Coenzyme A binding domain containing 5	91452	1.08799	1.09702	1.23201	1.31221	1.34506	1.3744	1.23183	6.81967	7.16213	0.000110969	0.000167786
1568920_at	---	---	---	-1.03862	1.57628	1.55831	1.99147	2.10453	1.47787	1.77082	6.24429	24.0404	1.98209e-09	5.62461e-09
1568954_s_at	C16orf72	chromosome 16 open reading frame 72	29035	1.20215	-1.21217	-1.02884	-1.10584	-1.24661	-1.3832	-1.30897	7.33699	19.8928	1.3523e-08	3.34797e-08
1568955_at	SRGAP2P1	SLIT-ROBO Rho GTPase activating protein 2 pseudogene 1	653464	1.03728	-1.07205	1.11754	1.44965	1.14403	1.09219	-1.19651	7.82066	11.5722	2.22767e-06	4.06543e-06
1568983_a_at	---	---	---	1.94315	2.53074	2.5865	3.23876	4.18582	3.49899	3.63695	8.18918	154.547	1.64498e-18	3.7352e-17
1568986_x_at	PIGT	phosphatidylinositol glycan anchor biosynthesis, class T	51604	1.26292	1.52282	1.31775	1.18371	1.45113	2.04179	1.45301	8.76758	8.47268	3.04334e-05	4.88765e-05
1569020_at	NEDD9	neural precursor cell expressed, developmentally down-regulated 9	4739	-1.00094	1.24518	1.1453	-1.07634	1.04073	1.2381	1.15257	6.50803	6.136	0.000337727	0.000487183
1569023_a_at	---	---	---	-1.43398	-2.27327	-1.73708	-5.33518	-4.19873	-3.53	-40.2215	7.96744	974.709	4.46597e-28	2.96941e-25
1569030_s_at	NUB1	negative regulator of ubiquitin-like proteins 1	51667	-1.14723	-1.42511	-1.6407	-1.67247	-1.58391	-1.51509	-1.78386	8.29047	31.5622	1.13784e-10	4.01051e-10
1569041_at	---	---	---	3.32225	5.5631	4.636	3.36862	6.3649	2.04087	2.57597	6.30061	120.451	3.07619e-17	4.87882e-16
1569053_at	AP3M2	adaptor-related protein complex 3, mu 2 subunit	10947	1.20555	1.60494	1.45081	1.2157	1.40247	-1.01347	1.26793	7.23634	16.3105	9.442e-08	2.06182e-07
1569069_s_at	TDRD3	tudor domain containing 3	81550	1.05387	1.2415	1.3457	1.31278	1.29453	1.17666	1.28147	7.71259	6.57975	0.000206258	0.000303684
1569074_at	FLJ37078	hypothetical protein FLJ37078	222183	1.0035	1.07293	1.13418	1.14141	1.15065	1.24715	1.35995	7.21354	6.45617	0.000236178	0.000345831
1569091_at	---	---	---	-1.02997	1.25231	1.28389	1.10031	1.17192	1.21501	1.15134	7.32021	7.7486	6.11881e-05	9.5221e-05
1569110_x_at	LOC728613	programmed cell death 6 pseudogene	728613	-1.24404	-1.74545	-1.7075	-1.56423	-1.64117	-1.62186	-1.78698	8.56512	29.4781	2.35366e-10	7.82972e-10
1569129_s_at	C3orf38	chromosome 3 open reading frame 38	285237	1.11818	1.16473	1.12576	1.49529	2.01553	1.24548	1.3046	6.38418	19.6589	1.52147e-08	3.74177e-08
1569132_s_at	ARSK	Arylsulfatase family, member K	153642	1.00503	-1.11128	-1.21686	-1.25423	-1.20227	-1.07913	-1.14672	6.90429	7.10352	0.000117955	0.000178017
1569144_a_at	C9orf169	chromosome 9 open reading frame 169	375791	-1.18316	-1.18795	-1.22859	-1.23865	-1.41442	-1.1862	-1.19194	7.29569	6.61922	0.000197584	0.000291393
1569149_at	PDLIM7	PDZ and LIM domain 7 (enigma)	9260	1.25236	1.22143	1.20192	-1.01891	1.209	1.29531	1.13878	6.61318	9.97126	8.02692e-06	1.37417e-05
1569150_x_at	PDLIM7	PDZ and LIM domain 7 (enigma)	9260	1.21043	1.23754	1.21454	1.04396	1.11796	1.1767	-1.09104	6.47818	6.75471	0.000170673	0.000253433
1569180_at	---	---	---	3.6805	6.58598	6.67356	5.98361	9.91704	5.26329	5.9003	7.29349	136.819	6.9028e-18	1.31518e-16
1569181_x_at	---	---	---	3.68774	6.97315	6.65221	6.48862	10.1407	5.71496	6.26395	7.29297	134.144	8.70513e-18	1.61584e-16
1569191_at	ZNF826	zinc finger protein 826	664701	1.15248	1.04044	-1.0041	-1.04003	-1.13703	-1.7214	-1.26225	7.81626	28.8126	2.99679e-10	9.76253e-10
1569202_x_at	---	---	---	1.27338	1.38866	1.46367	1.19212	1.48858	1.20056	1.16309	7.82796	11.2424	2.8702e-06	5.17178e-06
1569302_at	KIAA1731	KIAA1731	85459	1.11259	1.45673	1.43717	1.20995	1.18134	-1.23021	1.07567	8.08243	18.5697	2.67533e-08	6.32975e-08
1569320_at	GPBP1L1	GC-rich promoter binding protein 1-like 1	60313	2.57597	3.96229	3.34956	3.29924	3.64644	2.79055	2.10973	6.2871	69.6609	1.74187e-14	1.35722e-13
1569335_a_at	STRA6	stimulated by retinoic acid gene 6 homolog (mouse)	64220	1.02957	1.00698	1.09105	1.05417	-1.29783	-1.06629	-1.44042	6.51756	7.35431	9.10222e-05	0.000138906
1569409_x_at	---	---	---	1.35752	1.8067	1.49688	1.43639	1.80332	2.08802	1.59764	9.93655	24.8246	1.42312e-09	4.14454e-09
1569421_at	CLDN4	claudin 4	1364	1.01609	1.11352	1.02701	-1.06889	1.09498	1.20999	1.1287	6.72949	5.68941	0.00056566	0.000797657
1569428_at	LOC100129087 /// WIBG	hypothetical protein LOC100129087 /// within bgcn homolog (Drosophila)	100129087 /// 84305	1.02849	-1.02779	1.00387	-1.23713	-1.11269	1.09499	1.02816	6.54647	7.17303	0.00010972	0.000165975
1569470_a_at	FRMD5	FERM domain containing 5	84978	-1.17487	-1.1416	-1.24135	-1.31713	-1.32841	-1.04601	-1.0745	6.89723	7.81542	5.72749e-05	8.93888e-05
1569472_s_at	TTC3	tetratricopeptide repeat domain 3	7267	-1.23173	1.94213	3.3094	4.01308	4.98927	2.1253	2.26792	5.89603	65.3976	3.57923e-14	2.5998e-13
1569473_s_at	ZNF783	zinc finger family member 783	155060	-1.22464	-1.21402	-1.27244	-1.37564	-1.44124	-1.25209	-1.23161	7.98907	5.73598	0.000535533	0.000756861
1569476_at	DKFZP434L187	hypothetical LOC26082	26082	1.85006	3.27737	3.63935	6.78997	11.6378	4.79867	5.71306	7.02858	166.603	6.77898e-19	1.70901e-17
1569502_s_at	KIAA0495	KIAA0495	57212	-1.14998	-1.16759	-1.25317	-1.31432	-1.35848	-1.16566	-1.25878	6.96189	10.3754	5.73467e-06	9.97022e-06
1569512_at	---	---	---	-1.0344	1.90864	2.64261	2.53082	3.22345	1.92761	1.85855	5.90519	59.0128	1.14817e-13	7.48067e-13
1569519_at	KIAA1245 /// NBPF1 /// NBPF10 /// NBPF11 /// NBPF20 /// NBPF8 /// NBPF9 /// RP11-94I2.2	KIAA1245 /// neuroblastoma breakpoint family, member 1 /// neuroblastoma breakpoint family, member 10 /// neuroblastoma breakpoint family, member 11 /// neuroblastoma breakpoint family, member 20 /// neuroblastoma breakpoint family, member 8 /// neuroblastoma breakpoint family, member 9 /// neuroblastoma breakpoint family, member 11-like	100132406 /// 149013 /// 200030 /// 400818 /// 440670 /// 55672 /// 728841 /// 728912	1.34698	1.95972	1.99998	2.29932	2.76832	1.89481	1.60986	5.886	25.9165	9.10352e-10	2.7338e-09
1569532_a_at	LCN15	lipocalin 15	389812	-1.25001	-1.06698	-1.30571	-1.27375	-1.36886	-1.16127	-1.18028	7.03913	7.92673	5.13431e-05	8.04896e-05
1569594_a_at	SDCCAG1	serologically defined colon cancer antigen 1	9147	1.31634	1.73306	1.80813	1.75661	1.80374	1.26689	1.84193	9.48579	29.0525	2.74537e-10	9.008e-10
1569601_at	---	---	---	1.7786	2.17506	1.68323	1.20739	1.49298	-1.0297	1.04851	6.56586	17.594	4.53953e-08	1.03979e-07
1569607_s_at	ANKRD20A1 /// ANKRD20A2 /// ANKRD20A3 /// ANKRD20A4 /// C21orf81 /// LOC100132733 /// LOC284232 /// LOC643187 /// LOC647595 /// LOC653436 /// LOC727770 /// LOC728783	ankyrin repeat domain 20 family, member A1 /// ankyrin repeat domain 20 family, member A2 /// ankyrin repeat domain 20 family, member A3 /// ankyrin repeat domain 20 family, member A4 /// chromosome 21 open reading frame 81 /// hypothetical protein LOC100132733 /// ankyrin repeat domain 20 family, member A2 pseudogene /// hypothetical LOC643187 /// similar to ankyrin repeat domain 20A /// hypothe…	100132733 /// 284232 /// 391267 /// 441425 /// 441430 /// 643187 /// 647595 /// 653436 /// 727770 /// 728747 /// 728783 /// 84210	1.22936	1.75251	1.91589	1.82923	1.97972	1.78329	2.04396	6.53388	29.0304	2.76753e-10	9.07383e-10
1569652_at	MLLT3	myeloid/lymphoid or mixed-lineage leukemia (trithorax homolog, Drosophila); translocated to, 3	4300	-1.02078	2.10739	2.50572	2.8886	3.23113	2.84747	2.98811	6.29162	77.8513	4.87287e-15	4.30964e-14
1569789_at	---	---	---	1.00938	1.14458	-1.02321	-1.23291	-1.12694	-1.05457	-1.03624	6.90615	5.91302	0.00043582	0.000622487
1569847_at	CGNL1	Cingulin-like 1	84952	-1.28812	-1.49231	-1.51936	-1.9141	-1.85034	-1.72584	-1.89246	6.6801	31.7549	1.06618e-10	3.77537e-10
1569854_at	---	---	---	1.1379	1.88991	2.0701	2.51989	4.21443	2.26101	2.8619	6.20026	96.1469	4.25481e-16	4.92304e-15
1569868_s_at	EME2	essential meiotic endonuclease 1 homolog 2 (S. pombe)	197342	1.5424	1.16945	1.33587	1.31476	1.41249	1.38907	1.18552	6.89604	7.01601	0.000129281	0.000194274
1569871_at	LOC650392	Hypothetical protein LOC650392	650392	1.01545	1.2029	1.15813	-1.08349	1.07675	1.29458	1.20867	9.10095	9.45603	1.2493e-05	2.08964e-05
1569872_a_at	LOC650392	Hypothetical protein LOC650392	650392	1.04124	1.10521	1.07083	1.05604	1.40079	1.43208	1.22212	6.41777	13.5226	5.48837e-07	1.08038e-06
1569879_a_at	MEGF11	multiple EGF-like-domains 11	84465	-1.05114	-1.0308	-1.12685	-1.32378	-1.07824	1.14344	-1.05997	7.10138	7.70578	6.38468e-05	9.91622e-05
1569886_a_at	GLB1L3	galactosidase, beta 1-like 3	112937	4.19754	-1.35856	-1.61891	-2.34151	-2.35853	-2.36777	-3.00154	5.02812	237.551	1.0094e-20	4.44392e-19
1569905_at	HSD11B1L	hydroxysteroid (11-beta) dehydrogenase 1-like	374875	-1.02143	-1.06866	-1.05294	-1.03709	-1.10785	1.07735	1.20289	6.73768	6.86804	0.000151192	0.000225657
1569906_s_at	PHF20	PHD finger protein 20	51230	-1.05847	-1.08186	-1.08578	-1.20806	-1.31371	-1.42643	-1.39647	6.70108	6.62441	0.000196473	0.000289819
1569930_at	---	---	---	1.25297	1.44733	1.34517	1.23513	1.46545	1.22502	1.1878	6.55714	10.2214	6.51137e-06	1.12639e-05
1569935_at	ZNF664	Zinc finger protein 664	144348	1.19556	1.40705	1.27437	1.12041	1.21201	1.36375	1.34674	8.23624	5.76906	0.00051518	0.000729449
1569940_at	SLC6A16	Solute carrier family 6, member 16	28968	1.267	1.95003	1.8637	1.86802	2.51656	2.05156	1.89549	6.28715	37.1695	1.9506e-11	7.91565e-11
1570026_at	CPXM2	carboxypeptidase X (M14 family), member 2	119587	-1.0577	1.01492	-1.01942	-1.19937	-1.1737	1.09583	1.00048	7.44809	5.6666	0.000581078	0.000818375
1570124_at	---	---	---	1.06155	1.15074	1.17881	1.27835	1.42749	1.44496	1.53137	7.13098	11.9447	1.6834e-06	3.12225e-06
1570143_at	---	---	---	2.65386	2.82761	2.64538	2.66734	3.35821	1.58823	1.84649	7.43307	98.9314	3.05419e-16	3.68364e-15
1570153_at	C13orf38	chromosome 13 open reading frame 38	728591	-5.63231	-7.95869	-12.3638	-17.2392	-20.0706	-18.6455	-20.3563	5.08809	365.479	5.89478e-23	5.43977e-21
1570166_a_at	---	---	---	1.14569	1.46406	1.51113	1.22937	1.306	1.29091	1.22048	7.80618	10.3302	5.95181e-06	1.0336e-05
1570210_x_at	SAPS2	SAPS domain family, member 2	9701	1.50649	2.52155	2.36257	2.14818	2.5619	2.35223	2.06358	9.09899	50.3113	6.90415e-13	3.77385e-12
1570230_at	---	---	---	1.02003	1.233	1.03805	-1.03671	1.14158	1.18823	1.12297	6.90466	8.82661	2.19275e-05	3.57588e-05
1570266_x_at	---	---	---	1.31447	-1.38453	-1.5176	-2.08975	-1.87567	-1.52319	-2.10987	9.36822	110.27	8.6334e-17	1.2167e-15
1570402_at	KLC3	kinesin light chain 3	147700	-1.17912	-1.20155	-1.18341	-1.37118	-1.47661	-1.22038	-1.17862	7.38238	7.38709	8.8024e-05	0.000134561
1570412_at	---	---	---	1.2399	1.8251	1.78886	1.17028	1.19561	-1.07646	-1.16924	6.46045	21.9301	5.06983e-09	1.34368e-08
1570515_a_at	FILIP1	filamin A interacting protein 1	27145	2.29914	3.69927	2.45535	2.35556	1.79203	1.69572	2.56228	6.21652	51.3696	5.46963e-13	3.06467e-12
1570523_s_at	ATG10	ATG10 autophagy related 10 homolog (S. cerevisiae)	83734	-1.15661	-1.47101	-1.31449	-1.57161	-1.94525	-1.88375	-2.46261	5.91997	25.3428	1.14884e-09	3.39531e-09
160020_at	MMP14	matrix metallopeptidase 14 (membrane-inserted)	4323	1.06165	1.21533	1.20701	1.086	1.19328	1.31955	1.14112	7.94652	8.04072	4.59486e-05	7.24004e-05
1861_at	BAD	BCL2-associated agonist of cell death	572	-1.4626	-1.48074	-1.24326	-1.01326	-1.12739	-1.00631	1.23571	6.97564	21.4466	6.3541e-09	1.65713e-08
200000_s_at	PRPF8	PRP8 pre-mRNA processing factor 8 homolog (S. cerevisiae)	10594	1.77987	1.0915	1.25689	1.43652	1.57002	1.4498	1.17252	9.01298	28.1716	3.79942e-10	1.21483e-09
200001_at	CAPNS1	calpain, small subunit 1	826	-1.09188	-1.35528	-1.29818	-1.12937	-1.33404	-1.15808	-1.3238	8.98356	11.8087	1.8632e-06	3.4368e-06
200002_at	RPL35	ribosomal protein L35	11224	-1.20128	-1.13458	-1.10476	-1.18426	-1.32683	-1.24428	-1.35305	13.179	14.0323	3.90176e-07	7.82919e-07
200003_s_at	RPL28	ribosomal protein L28	6158	1.20307	1.17204	1.2006	1.31858	1.20748	1.26049	1.16676	13.6348	8.47374	3.0403e-05	4.88313e-05
200004_at	EIF4G2	eukaryotic translation initiation factor 4 gamma, 2	1982	1.09202	1.10366	1.14352	1.19479	1.27895	1.08636	1.24757	12.9484	9.36348	1.35491e-05	2.25886e-05
200005_at	EIF3D	eukaryotic translation initiation factor 3, subunit D	8664	-1.12073	-1.3335	-1.33465	-1.31492	-1.32981	-1.38448	-1.64494	10.5965	18.7448	2.43899e-08	5.80714e-08
200006_at	PARK7	Parkinson disease (autosomal recessive, early onset) 7	11315	-1.24378	-1.26308	-1.25163	-1.33455	-1.41472	-1.44395	-1.41028	12.32	16.5034	8.43397e-08	1.85608e-07
200008_s_at	GDI2	GDP dissociation inhibitor 2	2665	-1.16312	-1.21349	-1.09749	-1.21279	-1.24738	-1.4159	-1.32103	10.2023	6.95549	0.000137799	0.000206523
200011_s_at	ARF3	ADP-ribosylation factor 3	377	1.07826	-1.32985	-1.56755	-1.82208	-2.03428	-2.33934	-2.67345	8.95148	163.345	8.5597e-19	2.11191e-17
200013_at	RPL24	ribosomal protein L24	6152	-1.1337	-1.15313	-1.15874	-1.21971	-1.32884	-1.26428	-1.2394	13.5664	11.7935	1.88469e-06	3.47398e-06
200014_s_at	HNRNPC	heterogeneous nuclear ribonucleoprotein C (C1/C2)	3183	-1.02925	-1.12332	-1.20846	-1.34246	-1.31882	-1.4727	-1.46608	12.0153	21.169	7.24738e-09	1.87092e-08
200015_s_at	40788	septin 2	4735	-1.06683	-1.10668	-1.03167	1.10828	1.19278	1.05924	1.124	12.4512	10.4997	5.18021e-06	9.05237e-06
200019_s_at	FAU	Finkel-Biskis-Reilly murine sarcoma virus (FBR-MuSV) ubiquitously expressed	2197	-1.28731	-1.22665	-1.20526	-1.1962	-1.38529	-1.28337	-1.1848	12.9164	9.49721	1.2052e-05	2.01929e-05
200020_at	TARDBP	TAR DNA binding protein	23435	1.14137	-1.04146	1.00371	-1.15565	-1.08364	-1.54014	-1.31873	11.0803	37.1135	1.98283e-11	8.03637e-11
200021_at	CFL1	cofilin 1 (non-muscle)	1072	1.10217	-1.08681	-1.04238	1.04676	1.13125	-1.01029	1.02135	12.7823	5.93362	0.000425585	0.000608337
200023_s_at	EIF3F	eukaryotic translation initiation factor 3, subunit F	8665	1.20652	-1.20066	-1.11423	1.1357	1.1326	1.21069	-1.02229	11.5222	20.5897	9.58142e-09	2.42785e-08
200024_at	RPS5	ribosomal protein S5	6193	-1.32044	-1.23308	-1.25833	-1.26043	-1.41803	-1.26278	-1.26124	13.4048	15.2578	1.78217e-07	3.74258e-07
200025_s_at	RPL27	ribosomal protein L27	6155	-1.24721	-1.14314	-1.20201	-1.20152	-1.29267	-1.23947	-1.21025	13.8383	9.05934	1.77568e-05	2.92462e-05
200026_at	RPL34	ribosomal protein L34	6164	-1.26288	-1.12605	-1.13804	-1.14578	-1.2465	-1.21807	-1.13892	12.7997	7.32453	9.38418e-05	0.00014299
200027_at	NARS	asparaginyl-tRNA synthetase	4677	-1.28485	-1.44633	-1.41682	-1.70731	-1.72094	-2.0485	-1.85391	11.5262	50.9588	5.98388e-13	3.32123e-12
200028_s_at	STARD7	StAR-related lipid transfer (START) domain containing 7	56910	1.34079	-1.03597	-1.03932	-1.11376	-1.03804	-1.38204	-1.31117	10.8137	21.705	5.62908e-09	1.48055e-08
200031_s_at	RPS11	ribosomal protein S11	6205	-1.12212	1.05277	1.03883	1.10469	1.04602	1.08349	1.1748	13.7747	9.95333	8.14931e-06	1.39393e-05
200033_at	DDX5	DEAD (Asp-Glu-Ala-Asp) box polypeptide 5	1655	1.20299	1.17296	1.19637	1.25318	1.36603	1.10922	1.2482	12.485	9.89952	8.52891e-06	1.45521e-05
200035_at	DULLARD	dullard homolog (Xenopus laevis)	23399	1.23552	1.00194	1.03872	1.18863	1.27468	1.23541	1.14666	8.08913	7.45502	8.21444e-05	0.000126056
200036_s_at	RPL10A	ribosomal protein L10a	4736	-1.14724	-1.07534	-1.06447	-1.12363	-1.23924	-1.18351	-1.20349	13.3447	6.75741	0.000170179	0.000252759
200039_s_at	PSMB2	proteasome (prosome, macropain) subunit, beta type, 2	5690	-1.23802	-1.38994	-1.38998	-1.76133	-1.83126	-2.05982	-2.00009	11.2328	70.5221	1.51365e-14	1.19593e-13
200040_at	KHDRBS1	KH domain containing, RNA binding, signal transduction associated 1	10657	1.64762	1.13595	1.23819	1.49518	1.6766	1.68006	1.47856	11.5488	36.8655	2.13282e-11	8.59323e-11
200041_s_at	BAT1	HLA-B associated transcript 1	7919	1.11766	1.05934	1.01393	-1.06958	1.00237	-1.28346	-1.23493	9.60585	9.46746	1.23689e-05	2.06954e-05
200042_at	C22orf28	chromosome 22 open reading frame 28	51493	-1.23248	-1.31918	-1.18734	-1.2206	-1.32443	-1.4578	-1.52771	10.27	10.6732	4.5014e-06	7.91791e-06
200043_at	ERH	enhancer of rudimentary homolog (Drosophila)	2079	-1.11846	-1.14206	-1.13532	-1.22044	-1.18029	-1.34249	-1.20396	12.576	10.4465	5.40998e-06	9.43481e-06
200044_at	SFRS9	splicing factor, arginine/serine-rich 9	8683	1.2717	-1.1121	-1.05142	-1.03425	1.07112	-1.00583	-1.11915	11.0428	9.13817	1.65454e-05	2.73516e-05
200045_at	ABCF1	ATP-binding cassette, sub-family F (GCN20), member 1	23	1.37588	-1.05186	-1.00156	-1.02664	-1.0703	-1.09853	-1.22912	8.95942	23.5878	2.40988e-09	6.74334e-09
200046_at	DAD1	defender against cell death 1	1603	-1.78117	-1.36251	-1.23676	-1.1947	-1.45679	-1.45843	-1.26302	10.9989	30.0086	1.94794e-10	6.57538e-10
200047_s_at	YY1	YY1 transcription factor	7528	1.41555	1.00932	-1.04264	1.04849	1.11002	-1.01501	-1.17297	11.0391	11.5655	2.23895e-06	4.08448e-06
200048_s_at	JTB	jumping translocation breakpoint	10899	-1.09518	-1.2412	-1.23181	-1.1389	-1.12652	-1.07394	1.13382	10.6691	10.7708	4.16232e-06	7.34889e-06
200049_at	MYST2	MYST histone acetyltransferase 2	11143	1.56743	1.25086	1.17262	-1.23716	-1.2323	-1.29902	-1.48086	9.15901	82.3911	2.53797e-15	2.42312e-14
200050_at	ZNF146	zinc finger protein 146	7705	1.10717	1.08838	1.05047	-1.19022	-1.0485	-1.54605	-1.16573	10.4209	15.9542	1.16639e-07	2.5123e-07
200051_at	SART1	squamous cell carcinoma antigen recognized by T cells	9092	1.511	-1.09096	-1.00178	1.16817	1.18775	1.11739	1.0245	7.6416	12.5707	1.06596e-06	2.02531e-06
200053_at	SPAG7	sperm associated antigen 7	9552	-1.18678	-1.25895	-1.265	-1.23568	-1.36201	-1.28073	-1.33594	9.91533	7.97334	4.90589e-05	7.7053e-05
200054_at	ZNF259	zinc finger protein 259	8882	-1.30678	-1.28822	-1.28575	-1.6869	-1.95402	-2.21953	-2.16571	8.04965	60.2521	9.07531e-14	6.045e-13
200055_at	TAF10	TAF10 RNA polymerase II, TATA box binding protein (TBP)-associated factor, 30kDa	6881	1.08711	-1.17663	-1.12988	-1.17587	-1.21234	-1.19358	-1.3852	9.98668	8.46071	3.07774e-05	4.93867e-05
200056_s_at	C1D	C1D nuclear receptor co-repressor	10438	-1.27312	-1.21341	-1.46458	-1.27862	-1.50908	-1.49026	-1.47809	9.48244	8.50685	2.94744e-05	4.74044e-05
200057_s_at	NONO	non-POU domain containing, octamer-binding	4841	1.47564	1.24547	1.32681	1.42071	1.66091	1.38474	1.34074	12.0813	25.9769	8.8854e-10	2.6748e-09
200058_s_at	SNRNP200	small nuclear ribonucleoprotein 200kDa (U5)	23020	1.85523	1.33254	1.35073	1.53559	1.77446	1.53079	1.33281	10.4037	23.9947	2.02134e-09	5.72846e-09
200059_s_at	RHOA	ras homolog gene family, member A	387	1.09214	-1.01788	-1.02668	1.04296	-1.03828	-1.08214	-1.266	11.891	10.6642	4.53425e-06	7.97299e-06
200060_s_at	RNPS1	RNA binding protein S1, serine-rich domain	10921	1.38646	-1.08567	-1.01319	1.01694	1.13516	-1.04404	-1.18743	10.676	22.1896	4.4989e-09	1.20281e-08
200063_s_at	NPM1	nucleophosmin (nucleolar phosphoprotein B23, numatrin)	4869	1.0357	-1.07259	-1.1702	-1.22823	-1.25206	-1.31239	-1.48328	13.5235	27.9549	4.12118e-10	1.3098e-09
200064_at	HSP90AB1	heat shock protein 90kDa alpha (cytosolic), class B member 1	3326	1.31534	1.17507	1.20181	1.09876	1.03987	-1.08719	-1.15896	12.2282	18.4943	2.78462e-08	6.57154e-08
200065_s_at	ARF1	ADP-ribosylation factor 1	375	1.02564	-1.15211	-1.05543	1.15544	1.085	1.10189	1.01883	10.0378	5.97355	0.000406474	0.000582143
200067_x_at	SNX3	sorting nexin 3	8724	-1.43732	-1.31509	-1.25969	-1.03729	-1.17971	1.02097	-1.03843	10.7946	11.7348	1.96959e-06	3.61941e-06
200068_s_at	CANX	calnexin	821	1.04277	-1.07042	-1.05767	-1.1091	-1.06777	-1.29928	-1.16321	11.2284	12.0597	1.54589e-06	2.88143e-06
200069_at	SART3	squamous cell carcinoma antigen recognized by T cells 3	9733	1.65487	1.02988	1.01972	1.14892	1.23889	-1.06537	-1.0978	8.43597	19.0013	2.13257e-08	5.12271e-08
200070_at	C2orf24	chromosome 2 open reading frame 24	27013	1.21683	-1.14866	-1.14239	1.02403	1.02061	1.05291	1.11043	8.1562	9.80973	9.20556e-06	1.56397e-05
200071_at	SMNDC1	survival motor neuron domain containing 1	10285	1.27835	-1.02181	-1.17921	-1.2398	-1.14698	-1.3177	-1.54801	9.9221	22.4907	3.9224e-09	1.0595e-08
200072_s_at	HNRNPM	heterogeneous nuclear ribonucleoprotein M	4670	2.04893	1.21824	1.46507	1.47263	1.72239	1.26131	1.01528	10.8805	32.1716	9.27329e-11	3.32871e-10
200073_s_at	HNRNPD	heterogeneous nuclear ribonucleoprotein D (AU-rich element RNA binding protein 1, 37kDa)	3184	1.97529	1.3057	1.16084	1.30329	1.57611	1.34987	1.03857	11.843	27.1453	5.61114e-10	1.74547e-09
200074_s_at	RPL14 /// RPL14P1	ribosomal protein L14 /// ribosomal protein L14 pseudogene 1	144581 /// 9045	-1.03083	-1.05283	-1.06225	-1.08823	-1.25905	-1.17257	-1.33223	12.9322	15.5727	1.46864e-07	3.12338e-07
200076_s_at	C19orf50	chromosome 19 open reading frame 50	79036	-1.04844	-1.26132	-1.29176	-1.34264	-1.37226	-1.38551	-1.4331	8.41185	8.29429	3.60192e-05	5.73824e-05
200077_s_at	OAZ1	ornithine decarboxylase antizyme 1	4946	1.15059	-1.05617	-1.07628	-1.0346	-1.02786	-1.0695	-1.21353	12.7743	10.3036	6.08373e-06	1.0558e-05
200078_s_at	ATP6V0B	ATPase, H+ transporting, lysosomal 21kDa, V0 subunit b	533	1.06512	-1.09284	-1.03001	1.00583	-1.10548	-1.09363	1.22574	9.66565	9.28974	1.44596e-05	2.40554e-05
200079_s_at	KARS	lysyl-tRNA synthetase	3735	-1.05633	-1.21801	-1.23036	-1.32109	-1.38104	-1.52607	-1.55191	10.4281	19.1518	1.97229e-08	4.76551e-08
200081_s_at	RPS6	ribosomal protein S6	6194	-1.04412	1.02381	-1.00487	-1.0354	-1.12766	-1.13267	-1.1645	13.6886	6.63318	0.00019461	0.000287186
200082_s_at	RPS7 /// RPS7P11	ribosomal protein S7 /// ribosomal protein S7 pseudogene 11	6201 /// 644315	-1.18901	-1.0681	-1.10095	-1.16041	-1.24678	-1.24132	-1.22218	13.3726	9.00733	1.86085e-05	3.05829e-05
200083_at	USP22	ubiquitin specific peptidase 22	23326	1.74793	1.2751	1.45042	1.58874	1.83119	1.61636	1.49131	10.2363	36.1161	2.66568e-11	1.05468e-10
200084_at	C11orf58	chromosome 11 open reading frame 58	10944	-1.11882	-1.10848	-1.15305	-1.21999	-1.24554	-1.36726	-1.29946	11.5494	7.7113	6.34973e-05	9.86548e-05
200085_s_at	TCEB2	transcription elongation factor B (SIII), polypeptide 2 (18kDa, elongin B)	6923	-1.27516	-1.11047	-1.04899	-1.08653	-1.12998	-1.07513	1.04447	11.8906	6.87572	0.00014996	0.000223895
200086_s_at	COX4I1	cytochrome c oxidase subunit IV isoform 1	1327	-1.18924	-1.24547	-1.30034	-1.31788	-1.43683	-1.30886	-1.19663	11.9412	9.97345	8.01209e-06	1.37182e-05
200087_s_at	TMED2	transmembrane emp24 domain trafficking protein 2	10959	-1.2194	-1.3785	-1.2488	-1.24454	-1.26459	-1.30826	-1.08164	11.379	12.5187	1.10646e-06	2.09672e-06
200088_x_at	RPL12	ribosomal protein L12	6136	-1.17498	-1.14233	-1.13041	-1.22487	-1.38764	-1.34381	-1.4187	13.637	20.1175	1.20884e-08	3.01728e-08
200093_s_at	HINT1	histidine triad nucleotide binding protein 1	3094	-1.55918	-1.46007	-1.46611	-1.54882	-1.6459	-1.6167	-1.51858	12.288	24.7558	1.46454e-09	4.25657e-09
200094_s_at	EEF2	eukaryotic translation elongation factor 2	1938	1.29455	-1.22184	-1.15239	1.06058	1.05578	1.23058	1.03465	12.1941	15.176	1.87506e-07	3.92177e-07
200095_x_at	RPS10	ribosomal protein S10	6204	-1.10415	-1.11252	-1.0914	-1.17025	-1.26052	-1.22794	-1.25763	13.9198	10.4008	5.61613e-06	9.7733e-06
200096_s_at	ATP6V0E1	ATPase, H+ transporting, lysosomal 9kDa, V0 subunit e1	8992	-1.62013	-1.72457	-1.67685	-1.82527	-2.42602	-2.11601	-1.98421	10.2673	65.6065	3.45158e-14	2.51131e-13
200097_s_at	HNRNPK	heterogeneous nuclear ribonucleoprotein K	3190	1.23189	1.04621	-1.01435	1.08058	1.20661	1.1242	1.05629	11.9216	6.61323	0.000198875	0.000293213
200593_s_at	HNRNPU	heterogeneous nuclear ribonucleoprotein U (scaffold attachment factor A)	3192	1.87757	1.26646	1.43967	1.41823	1.67191	1.2527	1.03613	10.2859	31.0448	1.3574e-10	4.72085e-10
200594_x_at	HNRNPU	heterogeneous nuclear ribonucleoprotein U (scaffold attachment factor A)	3192	1.68581	1.25685	1.35615	1.34412	1.58039	1.2735	1.22572	12.1856	29.9471	1.99087e-10	6.70982e-10
200595_s_at	EIF3A	eukaryotic translation initiation factor 3, subunit A	8661	1.37575	1.06049	-1.0206	1.05029	1.11402	-1.10708	-1.31113	11.0887	20.3689	1.06755e-08	2.68659e-08
200596_s_at	EIF3A	eukaryotic translation initiation factor 3, subunit A	8661	1.53363	1.09944	1.11847	1.16748	1.17287	-1.11051	-1.30034	9.7245	16.8565	6.87764e-08	1.5348e-07
200597_at	EIF3A	eukaryotic translation initiation factor 3, subunit A	8661	1.23985	-1.1384	-1.25957	-1.04362	-1.04848	-1.25266	-1.34218	8.67328	25.0619	1.28962e-09	3.78335e-09
200598_s_at	HSP90B1	heat shock protein 90kDa beta (Grp94), member 1	7184	-1.16057	1.36865	1.09579	1.31313	-1.01658	1.01059	-1.14099	11.2983	14.6412	2.62688e-07	5.38606e-07
200599_s_at	HSP90B1	heat shock protein 90kDa beta (Grp94), member 1	7184	1.13763	1.14851	1.19668	1.11438	1.0841	-1.12312	-1.15946	11.8603	17.8964	3.8439e-08	8.88934e-08
200600_at	MSN	moesin	4478	1.01541	-1.28752	-1.19874	1.01101	-1.0711	-1.08091	-1.50999	9.98728	22.1127	4.66067e-09	1.24299e-08
200602_at	APP	amyloid beta (A4) precursor protein	351	-1.01717	-1.39715	-1.23477	-1.11373	-1.11747	-1.05637	-1.19768	10.8354	6.31194	0.00027713	0.000403201
200603_at	PRKAR1A	protein kinase, cAMP-dependent, regulatory, type I, alpha (tissue specific extinguisher 1)	5573	1.02799	-1.10751	-1.16922	1.33012	1.55807	1.51092	1.65258	10.9349	19.0986	2.02742e-08	4.88779e-08
200604_s_at	PRKAR1A	protein kinase, cAMP-dependent, regulatory, type I, alpha (tissue specific extinguisher 1)	5573	-1.20384	-1.32418	-1.11317	-1.07723	-1.27139	-1.56995	-1.65697	8.96219	18.9267	2.21706e-08	5.31337e-08
200605_s_at	PRKAR1A	protein kinase, cAMP-dependent, regulatory, type I, alpha (tissue specific extinguisher 1)	5573	-1.03242	-1.26187	1.02327	1.34142	1.62596	1.41985	1.59149	10.3959	28.8204	2.98825e-10	9.73592e-10
200606_at	DSP	desmoplakin	1832	1.41021	2.47118	2.94036	2.67958	2.28418	2.60639	1.71428	10.6157	139.721	5.39357e-18	1.05635e-16
200608_s_at	RAD21	RAD21 homolog (S. pombe)	5885	1.27382	1.2502	1.13328	1.3553	1.45936	1.3995	1.26431	11.3847	5.67551	0.000575006	0.000810264
200609_s_at	WDR1	WD repeat domain 1	9948	1.02246	-1.52006	-1.36567	-1.50831	-1.65444	-1.76955	-2.0234	10.3633	66.8205	2.80103e-14	2.08238e-13
200610_s_at	NCL	nucleolin	4691	1.36022	1.04927	-1.01461	-1.02665	1.04483	-1.1293	-1.32868	12.1067	29.5506	2.29315e-10	7.63727e-10
200611_s_at	WDR1	WD repeat domain 1	9948	-1.09332	-1.67779	-1.66694	-1.88478	-2.18886	-2.31394	-3.34252	9.5109	91.3462	7.70499e-16	8.41255e-15
200612_s_at	AP2B1	adaptor-related protein complex 2, beta 1 subunit	163	-1.1971	-1.43111	-1.44875	-1.31497	-1.25405	-1.31984	-1.09677	9.31106	12.6307	1.02122e-06	1.94486e-06
200613_at	AP2M1	adaptor-related protein complex 2, mu 1 subunit	1173	-1.14687	-1.5523	-1.58933	-1.58252	-1.75459	-1.71855	-1.75903	8.42381	17.6613	4.37381e-08	1.00298e-07
200614_at	CLTC	clathrin, heavy chain (Hc)	1213	1.28883	1.04748	1.17384	1.09898	1.13968	1.00096	1.05585	11.6658	9.83375	9.01902e-06	1.53409e-05
200615_s_at	AP2B1	adaptor-related protein complex 2, beta 1 subunit	163	-1.06105	-1.0667	-1.0438	-1.22502	-1.50018	-1.51188	-1.77102	8.90142	18.9779	2.15866e-08	5.17915e-08
200616_s_at	MLEC	malectin	9761	1.50997	1.15332	1.20819	1.10464	1.12652	-1.07184	-1.18768	10.2556	16.7886	7.15076e-08	1.5911e-07
200617_at	MLEC	malectin	9761	1.21476	-1.07062	-1.05481	-1.23051	-1.25063	-1.40855	-1.42027	8.809	30.226	1.80415e-10	6.1307e-10
200618_at	LASP1	LIM and SH3 protein 1	3927	-1.17021	-1.92124	-1.81306	-1.45057	-1.46632	-1.28696	-1.5415	10.3521	35.8522	2.88632e-11	1.13522e-10
200619_at	SF3B2	splicing factor 3b, subunit 2, 145kDa	10992	1.49939	-1.03271	1.06543	1.20247	1.29919	1.2417	1.13178	9.01686	15.6361	1.41303e-07	3.01277e-07
200620_at	TMEM59	transmembrane protein 59	9528	-1.56957	-1.41363	-1.26278	-1.01102	-1.15678	1.12944	1.48613	10.4479	69.1848	1.88381e-14	1.45839e-13
200621_at	CSRP1	cysteine and glycine-rich protein 1	1465	-1.73015	-1.72648	-1.5107	-1.24078	-1.42397	-1.20919	-1.49767	8.0692	20.7402	8.90591e-09	2.26834e-08
200625_s_at	CAP1	CAP, adenylate cyclase-associated protein 1 (yeast)	10487	-1.51616	-1.89448	-1.80858	-1.85285	-1.96885	-2.12842	-2.31528	10.5507	72.527	1.09834e-14	8.94503e-14
200626_s_at	MATR3	matrin 3	9782	1.1828	1.23997	1.17939	1.16989	1.30663	1.11966	1.36186	12.2141	9.05112	1.78886e-05	2.94558e-05
200627_at	PTGES3	prostaglandin E synthase 3 (cytosolic)	10728	1.22726	1.03063	1.0377	-1.07192	-1.02973	-1.22015	-1.22817	12.4621	17.4073	5.03623e-08	1.14718e-07
200628_s_at	WARS	tryptophanyl-tRNA synthetase	7453	-1.24323	-1.58633	-1.40694	-1.47743	-1.56229	-1.62105	-2.3038	8.39067	31.1519	1.30844e-10	4.56629e-10
200629_at	WARS	tryptophanyl-tRNA synthetase	7453	-1.269	-1.77778	-1.42486	-1.45729	-1.54042	-1.61139	-2.23313	9.87643	53.5117	3.45922e-13	2.02714e-12
200630_x_at	SET	SET nuclear oncogene	6418	1.13136	-1.03971	-1.07615	-1.21321	-1.11408	-1.37708	-1.33197	12.76	29.2615	2.54483e-10	8.40531e-10
200631_s_at	SET	SET nuclear oncogene	6418	1.14472	-1.10943	-1.18333	-1.27214	-1.20444	-1.44152	-1.44674	12.7016	37.4766	1.78348e-11	7.29685e-11
200632_s_at	NDRG1	N-myc downstream regulated 1	10397	-1.34921	1.0505	1.11373	1.46658	1.10927	2.84078	1.5081	6.85817	71.9892	1.19603e-14	9.66478e-14
200633_at	UBB	ubiquitin B	7314	-1.1108	-1.01848	1.04966	1.0698	1.06482	1.09378	1.14915	14.0054	8.87522	2.09761e-05	3.42807e-05
200634_at	PFN1	profilin 1	5216	1.00136	-1.50164	-1.61867	-1.6903	-1.95462	-2.06456	-3.2581	9.77372	60.1529	9.2462e-14	6.14405e-13
200635_s_at	PTPRF	protein tyrosine phosphatase, receptor type, F	5792	1.77412	1.43197	1.69935	1.36536	1.30703	1.23288	1.11298	8.37538	15.0685	2.00499e-07	4.17802e-07
200636_s_at	PTPRF	protein tyrosine phosphatase, receptor type, F	5792	1.70541	1.67104	1.74041	1.45207	1.45549	1.45845	1.3124	9.53729	38.2785	1.41589e-11	5.90887e-11
200640_at	YWHAZ	tyrosine 3-monooxygenase/tryptophan 5-monooxygenase activation protein, zeta polypeptide	7534	-1.11342	-1.19988	-1.09345	-1.20715	-1.15227	-1.37532	-1.24114	11.3108	8.26416	3.70675e-05	5.89764e-05
200642_at	SOD1	superoxide dismutase 1, soluble	6647	-1.60558	-1.60236	-1.50926	-1.44592	-1.50438	-1.57676	-1.42105	11.9312	22.2861	4.30468e-09	1.1547e-08
200644_at	MARCKSL1	MARCKS-like 1	65108	1.49319	1.14482	1.30432	1.3411	1.6767	1.36775	1.63281	12.085	41.633	5.63972e-12	2.54072e-11
200645_at	GABARAP	GABA(A) receptor-associated protein	11337	-1.19005	1.00097	1.12857	1.32273	1.32159	1.38531	1.66371	11.4074	62.3201	6.19038e-14	4.27036e-13
200647_x_at	EIF3C /// EIF3CL	eukaryotic translation initiation factor 3, subunit C /// eukaryotic translation initiation factor 3, subunit C-like	728689 /// 8663	1.41682	1.0297	1.04352	1.10945	1.11736	-1.00266	-1.08027	11.1044	17.8415	3.96101e-08	9.14629e-08
200648_s_at	GLUL	glutamate-ammonia ligase (glutamine synthetase)	2752	-1.09373	1.12515	1.19511	1.10386	-1.28627	-1.20389	-1.51751	8.36089	23.0043	3.11488e-09	8.5482e-09
200650_s_at	LDHA	lactate dehydrogenase A	3939	-1.18803	-1.40844	-1.57356	-1.70752	-1.69678	1.23855	-1.7827	11.9667	79.0277	4.10104e-15	3.70279e-14
200651_at	GNB2L1	guanine nucleotide binding protein (G protein), beta polypeptide 2-like 1	10399	-1.13296	-1.17288	-1.19661	-1.13157	-1.22771	-1.23149	-1.15606	13.4679	6.18817	0.000318393	0.000460651
200652_at	SSR2	signal sequence receptor, beta (translocon-associated protein beta)	6746	-1.12909	-1.07431	1.01957	1.2273	1.13715	1.19228	1.22866	11.0631	16.0626	1.09338e-07	2.36389e-07
200653_s_at	CALM1	calmodulin 1 (phosphorylase kinase, delta)	801	-1.06337	-1.06438	-1.23317	-1.16893	-1.15761	-1.43441	-1.11866	11.2576	8.46898	3.05394e-05	4.90291e-05
200654_at	P4HB	prolyl 4-hydroxylase, beta polypeptide	5034	1.06161	-1.10731	1.05102	1.26505	1.08551	1.30463	1.04906	10.3661	11.5393	2.28408e-06	4.16134e-06
200655_s_at	CALM1	calmodulin 1 (phosphorylase kinase, delta)	801	-1.02732	-1.08371	-1.15497	-1.19573	-1.20984	-1.45862	-1.13284	12.1449	19.7665	1.441e-08	3.55398e-08
200656_s_at	P4HB	prolyl 4-hydroxylase, beta polypeptide	5034	1.08145	-1.14747	1.00028	1.33246	1.01229	1.25019	-1.14035	7.91485	9.49957	1.20272e-05	2.0155e-05
200657_at	SLC25A5	solute carrier family 25 (mitochondrial carrier; adenine nucleotide translocator), member 5	292	-1.05473	-1.18144	-1.21479	-1.32639	-1.41797	-1.42595	-1.50287	12.0349	27.2007	5.49255e-10	1.71145e-09
200658_s_at	PHB	prohibitin	5245	-1.18048	-1.28363	-1.24223	-1.56927	-1.78543	-1.98895	-2.2561	10.1061	34.3499	4.58559e-11	1.73844e-10
200659_s_at	PHB	prohibitin	5245	-1.10402	-1.59421	-1.69645	-1.85219	-2.27269	-2.38337	-2.45329	8.65923	69.0029	1.94128e-14	1.49775e-13
200660_at	S100A11	S100 calcium binding protein A11	6282	-1.98107	-1.69003	-1.3531	-1.24995	-1.66227	-1.74608	-3.4382	9.03504	47.2996	1.37429e-12	7.02616e-12
200661_at	CTSA	cathepsin A	5476	1.35116	-1.05413	1.07387	1.18384	1.07335	1.15296	1.23402	8.38591	9.92179	8.36955e-06	1.42924e-05
200662_s_at	TOMM20	translocase of outer mitochondrial membrane 20 homolog (yeast)	9804	1.03624	-1.3095	-1.41254	-1.03633	-1.10427	-1.09176	-1.21828	11.5438	18.4031	2.92339e-08	6.87774e-08
200663_at	CD63	CD63 molecule	967	1.03611	-1.04407	1.00704	1.15198	1.00782	1.21189	1.06846	11.7719	6.94372	0.000139524	0.000209061
200664_s_at	DNAJB1	DnaJ (Hsp40) homolog, subfamily B, member 1	3337	-1.19871	-1.21017	-1.12862	-1.45646	-1.50649	-1.3918	-1.57953	7.283	16.114	1.06045e-07	2.2971e-07
200665_s_at	SPARC	secreted protein, acidic, cysteine-rich (osteonectin)	6678	-1.78158	-2.11003	-1.38445	1.97696	1.64992	2.91989	2.29486	11.1445	295.29	7.54613e-22	4.69253e-20
200666_s_at	DNAJB1	DnaJ (Hsp40) homolog, subfamily B, member 1	3337	-1.00509	1.01997	1.06665	-1.03628	-1.04405	-1.35339	1.03243	8.23661	9.99326	7.87945e-06	1.35026e-05
200668_s_at	UBE2D3	ubiquitin-conjugating enzyme E2D 3 (UBC4/5 homolog, yeast)	7323	-1.08794	-1.1446	-1.16836	-1.19372	-1.23389	-1.43037	-1.311	11.4282	10.6224	4.68972e-06	8.22906e-06
200669_s_at	UBE2D3	ubiquitin-conjugating enzyme E2D 3 (UBC4/5 homolog, yeast)	7323	-1.08601	-1.14149	-1.19983	-1.25402	-1.31777	-1.58647	-1.51971	11.0915	14.1625	3.58145e-07	7.21887e-07
200670_at	XBP1	X-box binding protein 1	7494	-1.31175	-1.03609	-1.26518	-1.25312	-1.43106	-1.58152	-1.54934	9.54138	10.0623	7.43533e-06	1.27796e-05
200672_x_at	SPTBN1	spectrin, beta, non-erythrocytic 1	6711	1.16104	-1.02263	1.08783	1.07485	1.00309	-1.03623	-1.16474	8.02919	7.55198	7.44739e-05	0.000114842
200673_at	LAPTM4A	lysosomal protein transmembrane 4 alpha	9741	-1.1638	-1.09042	-1.11393	-1.22935	-1.43661	-1.34601	-1.71886	11.9993	35.5592	3.15473e-11	1.23219e-10
200675_at	CD81	CD81 molecule	975	1.03037	-1.52786	-1.32829	-1.29966	-1.21207	-1.18113	-1.43507	10.1005	18.3343	3.03299e-08	7.12074e-08
200677_at	PTTG1IP	pituitary tumor-transforming 1 interacting protein	754	-1.17629	-1.08369	1.16532	1.46474	1.43874	1.31968	1.45379	11.4175	54.6266	2.74359e-13	1.64609e-12
200678_x_at	GRN	granulin	2896	1.30609	-1.09459	-1.01325	1.15271	1.0321	1.09896	-1.08107	8.3278	11.2909	2.76416e-06	4.98938e-06
200681_at	GLO1	glyoxalase I	2739	-1.4548	-1.42867	-1.55762	-1.67115	-1.6404	-1.7199	-1.66668	11.1381	28.126	3.86482e-10	1.23361e-09
200682_s_at	UBE2L3	ubiquitin-conjugating enzyme E2L 3	7332	-1.08194	-1.35055	-1.33533	-1.34573	-1.40257	-1.55321	-1.78704	10.9856	30.3849	1.70637e-10	5.82591e-10
200683_s_at	UBE2L3	ubiquitin-conjugating enzyme E2L 3	7332	1.20065	-1.04699	1.02974	-1.01067	-1.00432	-1.23106	-1.16021	9.32465	12.4872	1.13185e-06	2.14296e-06
200684_s_at	UBE2L3	ubiquitin-conjugating enzyme E2L 3	7332	-1.00204	-1.23879	-1.17899	-1.01776	-1.06106	-1.25715	-1.02693	7.98823	6.3043	0.000279502	0.000406493
200685_at	SFRS11	splicing factor, arginine/serine-rich 11	9295	-1.01449	1.14325	-1.0718	1.34927	1.51891	1.10704	1.66349	8.52795	19.5979	1.5693e-08	3.85063e-08
200686_s_at	SFRS11	splicing factor, arginine/serine-rich 11	9295	1.42809	1.58185	1.43436	1.37254	1.51297	1.19247	1.1099	11.6914	10.6623	4.54087e-06	7.98137e-06
200687_s_at	SF3B3	splicing factor 3b, subunit 3, 130kDa	23450	1.59314	1.28763	1.21695	1.29639	1.29214	1.19685	1.13123	9.24028	18.1097	3.42296e-08	7.97664e-08
200689_x_at	EEF1G	eukaryotic translation elongation factor 1 gamma	1937	1.17554	1.26962	1.31017	1.35952	1.29432	1.35858	1.45256	13.2022	16.9805	6.4071e-08	1.43536e-07
200690_at	HSPA9	heat shock 70kDa protein 9 (mortalin)	3313	-1.1216	-1.78546	-2.04075	-2.1056	-1.86569	-2.27929	-2.14046	8.23246	38.9481	1.17156e-11	4.96077e-11
200691_s_at	HSPA9	heat shock 70kDa protein 9 (mortalin)	3313	-1.02471	-1.6002	-1.5728	-1.84491	-1.72822	-2.19294	-2.08779	10.8809	52.4925	4.29249e-13	2.45877e-12
200692_s_at	HSPA9	heat shock 70kDa protein 9 (mortalin)	3313	-1.02614	-1.70736	-1.71103	-1.94455	-1.93554	-2.44421	-2.63675	9.7739	56.5769	1.84815e-13	1.14817e-12
200693_at	YWHAQ	tyrosine 3-monooxygenase/tryptophan 5-monooxygenase activation protein, theta polypeptide	10971	-1.04328	-1.07909	-1.02284	1.02463	1.09163	-1.07744	1.18989	12.015	9.09996	1.71211e-05	2.8244e-05
200694_s_at	DDX24	DEAD (Asp-Glu-Ala-Asp) box polypeptide 24	57062	-1.13559	-1.27427	-1.34469	-1.24003	-1.19659	-1.29963	-1.01154	10.0865	14.1625	3.58146e-07	7.21887e-07
200696_s_at	GSN	gelsolin (amyloidosis, Finnish type)	2934	1.5304	1.69154	1.87366	1.85582	1.35409	1.99201	1.47442	8.72754	38.876	1.19555e-11	5.05078e-11
200697_at	HK1	hexokinase 1	3098	-1.10318	-2.14145	-1.84787	-1.67283	-1.82682	-1.4676	-1.85424	9.45007	73.806	8.99011e-15	7.49109e-14
200698_at	KDELR2	KDEL (Lys-Asp-Glu-Leu) endoplasmic reticulum protein retention receptor 2	11014	-1.06415	-1.28933	-1.11199	1.25858	1.22066	1.31527	1.16242	9.15678	19.1628	1.96114e-08	4.74122e-08
200699_at	KDELR2	KDEL (Lys-Asp-Glu-Leu) endoplasmic reticulum protein retention receptor 2	11014	-1.09302	-1.20631	1.04794	1.48512	1.37051	1.43559	1.75121	9.08933	71.1579	1.36602e-14	1.08824e-13
200700_s_at	KDELR2	KDEL (Lys-Asp-Glu-Leu) endoplasmic reticulum protein retention receptor 2	11014	-1.15562	-1.17996	1.00726	1.32111	1.0242	1.26227	-1.12823	10.2857	24.0891	1.94124e-09	5.52076e-09
200701_at	NPC2	Niemann-Pick disease, type C2	10577	-1.67339	-1.48198	-1.61059	-1.77188	-2.23822	-2.27294	-2.66233	10.6337	77.7703	4.93155e-15	4.35262e-14
200703_at	DYNLL1	dynein, light chain, LC8-type 1	8655	-1.28244	-1.06613	-1.10906	-1.22927	-1.25112	-1.60532	-1.07842	12.8497	19.736	1.46332e-08	3.60698e-08
200704_at	LITAF	lipopolysaccharide-induced TNF factor	9516	1.32632	-1.64035	-2.01016	-2.48775	-2.78794	-2.26984	-3.46082	9.03461	249.571	5.60879e-21	2.67356e-19
200705_s_at	EEF1B2	eukaryotic translation elongation factor 1 beta 2	1933	-1.15593	-1.10791	-1.14196	-1.25227	-1.44697	-1.38991	-1.51695	13.2308	31.5813	1.1305e-10	3.98628e-10
200706_s_at	LITAF	lipopolysaccharide-induced TNF factor	9516	1.31655	-1.79583	-2.03027	-2.37691	-2.74506	-2.65212	-3.26705	7.78228	171.87	4.69283e-19	1.23168e-17
200708_at	GOT2	glutamic-oxaloacetic transaminase 2, mitochondrial (aspartate aminotransferase 2)	2806	1.09925	-1.41172	-1.47745	-1.35827	-1.32578	-1.44666	-1.34491	10.0546	35.8779	2.86406e-11	1.12732e-10
200709_at	FKBP1A	FK506 binding protein 1A, 12kDa	2280	-1.26975	-1.53561	-1.56556	-1.75711	-2.05786	-2.12346	-2.34498	8.75228	60.9233	8.00497e-14	5.38741e-13
200710_at	ACADVL	acyl-Coenzyme A dehydrogenase, very long chain	37	1.15423	-1.04728	1.0321	1.35737	1.17302	1.36574	1.21858	8.52121	13.5878	5.25135e-07	1.03593e-06
200711_s_at	SKP1	S-phase kinase-associated protein 1	6500	-1.26158	-1.33616	-1.40904	-1.39017	-1.4102	-1.43603	-1.12345	10.7424	14.8833	2.2524e-07	4.66434e-07
200712_s_at	MAPRE1	microtubule-associated protein, RP/EB family, member 1	22919	-1.21888	-1.33402	-1.33198	-1.42649	-1.68143	-2.13378	-2.17147	8.16955	53.7377	3.29922e-13	1.94216e-12
200715_x_at	RPL13A	ribosomal protein L13a	23521	-1.28509	-1.33405	-1.51405	-1.47414	-1.70467	-1.48385	-1.58477	12.2152	29.6242	2.23355e-10	7.4608e-10
200719_at	SKP1	S-phase kinase-associated protein 1	6500	-1.40459	-1.55527	-1.74212	-1.64249	-1.44926	-1.72791	-1.37094	8.26226	21.6363	5.8127e-09	1.52606e-08
200720_s_at	ACTR1A	ARP1 actin-related protein 1 homolog A, centractin alpha (yeast)	10121	-1.48979	-1.35783	-1.32207	-1.11769	-1.12186	-1.08915	1.16838	8.18523	23.4579	2.55036e-09	7.10425e-09
200721_s_at	ACTR1A	ARP1 actin-related protein 1 homolog A, centractin alpha (yeast)	10121	1.05762	-1.11535	-1.0835	1.04102	1.1179	1.02578	1.19317	8.38399	7.54914	7.46875e-05	0.000115144
200723_s_at	CAPRIN1	cell cycle associated protein 1	4076	1.18118	1.07917	1.1881	1.27278	1.31927	1.06768	1.26009	11.238	7.21937	0.000104575	0.000158517
200725_x_at	RPL10	ribosomal protein L10	6134	-1.16683	-1.10635	-1.06402	-1.02476	-1.08887	-1.02874	1.04294	13.5946	6.14127	0.000335718	0.000484581
200726_at	PPP1CC	protein phosphatase 1, catalytic subunit, gamma isoform	5501	1.00045	-1.13839	-1.20143	-1.23648	-1.24139	-1.35599	-1.38775	12.3128	18.2035	3.2539e-08	7.607e-08
200727_s_at	ACTR2	ARP2 actin-related protein 2 homolog (yeast)	10097	-1.36907	-1.43578	-1.1291	-1.51929	-1.38823	-1.86773	-2.30425	7.37257	32.8474	7.42061e-11	2.7102e-10
200730_s_at	PTP4A1	protein tyrosine phosphatase type IVA, member 1	7803	-1.06995	-1.35217	-1.26077	-1.34251	-1.51951	-1.42311	-1.55628	7.71924	18.2635	3.15042e-08	7.37972e-08
200731_s_at	PTP4A1	protein tyrosine phosphatase type IVA, member 1	7803	-1.18963	-1.47756	-1.32956	-1.03048	1.05933	-1.01686	1.17113	8.22957	13.0367	7.66779e-07	1.48085e-06
200732_s_at	PTP4A1	protein tyrosine phosphatase type IVA, member 1	7803	-1.09013	-1.25955	-1.24318	1.10598	1.18801	1.20797	1.41222	8.99972	28.6772	3.14966e-10	1.0231e-09
200734_s_at	ARF3	ADP-ribosylation factor 3	377	-1.1918	-1.23048	-1.33462	-1.40628	-1.49764	-1.45768	-1.33841	9.90202	17.5667	4.60862e-08	1.05459e-07
200736_s_at	GPX1	glutathione peroxidase 1	2876	-1.59784	-1.61972	-1.6128	-1.8653	-2.13185	-1.85208	-1.8527	11.1543	44.7471	2.54379e-12	1.23111e-11
200737_at	PGK1	phosphoglycerate kinase 1	5230	-1.19736	-1.46163	-1.65044	-1.72693	-2.03808	-1.21479	-1.97887	9.40716	47.093	1.44288e-12	7.34931e-12
200738_s_at	PGK1	phosphoglycerate kinase 1	5230	-1.14362	-1.41432	-1.59145	-1.6371	-1.79974	-1.09682	-1.72707	11.5807	68.1359	2.24271e-14	1.70845e-13
200739_s_at	SUMO3	SMT3 suppressor of mif two 3 homolog 3 (S. cerevisiae)	6612	-1.35858	-1.38367	-1.48429	-1.42976	-1.66542	-1.4768	-1.64969	7.54461	18.89	2.25999e-08	5.40975e-08
200740_s_at	SUMO3	SMT3 suppressor of mif two 3 homolog 3 (S. cerevisiae)	6612	1.09512	-1.26555	-1.35246	-1.10717	-1.0572	1.01486	-1.07492	10.5507	12.2803	1.31483e-06	2.46885e-06
200742_s_at	TPP1	tripeptidyl peptidase I	1200	1.22456	1.4546	1.48226	1.37503	1.25074	1.38929	1.2938	6.46516	10.5687	4.89774e-06	8.57782e-06
200743_s_at	TPP1	tripeptidyl peptidase I	1200	1.6085	1.67825	1.91473	1.98921	1.8165	1.69247	1.62928	8.37438	40.7139	7.20798e-12	3.17983e-11
200744_s_at	GNB1	guanine nucleotide binding protein (G protein), beta polypeptide 1	2782	1.15789	-1.19198	-1.10524	-1.04102	-1.14085	-1.28266	-1.70796	9.24892	14.0082	3.96433e-07	7.94858e-07
200745_s_at	GNB1	guanine nucleotide binding protein (G protein), beta polypeptide 1	2782	-1.0315	-1.22866	-1.1679	1.14056	1.24022	1.20467	1.25894	9.88507	16.2814	9.6055e-08	2.0947e-07
200746_s_at	GNB1	guanine nucleotide binding protein (G protein), beta polypeptide 1	2782	1.06013	-1.3723	-1.24218	1.05098	1.32185	1.17935	1.30827	10.1126	33.7863	5.48074e-11	2.04963e-10
200747_s_at	NUMA1	nuclear mitotic apparatus protein 1	4926	1.32083	1.2119	1.17847	1.35822	1.40852	1.47968	1.41024	8.41354	12.2922	1.30356e-06	2.44875e-06
200748_s_at	FTH1	ferritin, heavy polypeptide 1	2495	-1.35908	-1.61239	-1.28705	-1.47065	-1.54916	-1.55846	-1.61513	12.381	14.3433	3.18277e-07	6.45441e-07
200749_at	RAN	RAN, member RAS oncogene family	5901	1.14924	-1.1909	-1.29407	-1.09655	1.01213	-1.20499	1.17588	10.5385	11.1992	2.96815e-06	5.33938e-06
200750_s_at	RAN	RAN, member RAS oncogene family	5901	-1.15578	-1.1677	-1.19265	-1.3799	-1.39461	-1.605	-1.69136	12.7239	37.2397	1.91096e-11	7.77302e-11
200751_s_at	HNRNPC	heterogeneous nuclear ribonucleoprotein C (C1/C2)	3183	1.13002	1.15921	1.13858	1.03995	1.02	-1.09635	-1.1187	12.1782	7.00384	0.000130947	0.000196641
200752_s_at	CAPN1	calpain 1, (mu/I) large subunit	823	1.48843	1.05674	1.14852	-1.00061	-1.04516	1.22741	-1.04374	7.47571	7.83651	5.60965e-05	8.76553e-05
200753_x_at	SFRS2	splicing factor, arginine/serine-rich 2	6427	1.31828	-1.00279	-1.08886	-1.18215	-1.06867	-1.60215	-1.64399	10.8035	59.7242	1.00259e-13	6.61867e-13
200754_x_at	SFRS2	splicing factor, arginine/serine-rich 2	6427	1.50136	1.1596	1.13124	1.08375	1.22386	-1.21995	-1.18746	11.7305	51.5245	5.2882e-13	2.972e-12
200755_s_at	CALU	calumenin	813	-1.46429	-1.5187	-1.47472	-1.4295	-1.61142	-1.98962	-2.22852	9.0879	39.423	1.02612e-11	4.38067e-11
200756_x_at	CALU	calumenin	813	-1.24029	-1.16675	-1.10106	-1.15136	-1.26653	-1.41008	-1.54181	7.77015	12.3288	1.26929e-06	2.38854e-06
200757_s_at	CALU	calumenin	813	-1.35452	-1.26593	-1.22673	-1.10906	-1.27655	-1.34205	-1.56306	10.3459	15.413	1.61949e-07	3.42341e-07
200758_s_at	NFE2L1	nuclear factor (erythroid-derived 2)-like 1	4779	1.25543	-1.50908	-1.37409	-1.29234	-1.21658	-1.28677	-1.49067	8.68005	25.7442	9.75778e-10	2.91647e-09
200759_x_at	NFE2L1	nuclear factor (erythroid-derived 2)-like 1	4779	1.30438	-1.32983	-1.17758	-1.22172	-1.05872	-1.16874	-1.24376	8.91828	21.0522	7.66325e-09	1.97158e-08
200760_s_at	ARL6IP5	ADP-ribosylation-like factor 6 interacting protein 5	10550	-1.63503	-1.25167	-1.04483	1.26429	1.01426	1.07398	1.5579	9.61086	38.5913	1.29552e-11	5.44652e-11
200761_s_at	ARL6IP5	ADP-ribosylation-like factor 6 interacting protein 5	10550	-1.61483	-1.18026	-1.09037	1.29031	1.03127	1.23455	1.95534	9.86696	44.5995	2.6386e-12	1.27154e-11
200762_at	DPYSL2	dihydropyrimidinase-like 2	1808	1.31836	1.0203	1.03278	1.53668	2.39936	1.98527	2.76344	11.3739	67.0003	2.71651e-14	2.02769e-13
200764_s_at	CTNNA1	catenin (cadherin-associated protein), alpha 1, 102kDa	1495	-1.00536	-1.23722	-1.21401	-1.07309	-1.20285	-1.37716	-1.46675	9.67295	7.29673	9.6558e-05	0.000146922
200765_x_at	CTNNA1	catenin (cadherin-associated protein), alpha 1, 102kDa	1495	1.08906	-1.08725	-1.01966	1.06912	1.02294	-1.08535	-1.16557	9.90652	7.02163	0.00012852	0.000193164
200766_at	CTSD	cathepsin D	1509	1.02778	-1.6487	-1.41315	-1.38341	-1.82577	-1.33039	-1.62165	6.33643	15.9949	1.13836e-07	2.45458e-07
200768_s_at	MAT2A	methionine adenosyltransferase II, alpha	4144	1.28593	1.14516	1.13242	1.17549	1.27723	-1.19108	1.02142	10.6706	17.7225	4.22856e-08	9.71909e-08
200769_s_at	MAT2A	methionine adenosyltransferase II, alpha	4144	1.08364	-1.06227	-1.04505	-1.18656	-1.39569	-1.47492	-1.68054	6.94235	28.8914	2.91154e-10	9.5087e-10
200770_s_at	LAMC1	laminin, gamma 1 (formerly LAMB2)	3915	-1.02712	-1.30948	-1.21885	-1.1402	-1.42729	-1.19802	-1.34585	7.95399	12.6979	9.73411e-07	1.85722e-06
200771_at	LAMC1	laminin, gamma 1 (formerly LAMB2)	3915	1.00977	-1.19181	-1.09889	-1.0069	-1.11828	-1.2915	-1.81443	9.56738	34.7956	3.98971e-11	1.5302e-10
200772_x_at	PTMA	prothymosin, alpha	5757	1.22489	-1.04417	-1.17683	-1.14808	-1.04108	-1.17129	-1.16143	12.8928	23.0865	3.00339e-09	8.272e-09
200773_x_at	PTMA	prothymosin, alpha	5757	1.14308	1.01559	-1.09863	-1.11628	-1.01088	-1.10632	-1.07414	13.1741	7.61686	6.97748e-05	0.000107968
200774_at	FAM120A	family with sequence similarity 120A	23196	1.69178	1.29017	1.31612	1.38473	1.47727	1.00367	1.08165	10.0057	17.3815	5.10938e-08	1.16282e-07
200775_s_at	HNRNPK	heterogeneous nuclear ribonucleoprotein K	3190	1.20256	1.11162	1.14672	1.17231	1.20934	1.05381	1.091	12.679	5.70982	0.000552237	0.000779662
200776_s_at	BZW1 /// BZW1L1	basic leucine zipper and W2 domains 1 /// basic leucine zipper and W2 domains 1 like 1	151579 /// 9689	-1.26533	-1.48609	-1.45636	-1.47671	-1.58428	-2.00921	-1.72936	9.32498	24.3021	1.77285e-09	5.07472e-09
200777_s_at	BZW1	basic leucine zipper and W2 domains 1	9689	-1.06267	-1.17302	-1.19223	-1.26823	-1.17879	-1.52489	-1.33481	11.4995	7.67471	6.58544e-05	0.000102109
200778_s_at	40788	septin 2	4735	1.08537	-1.04924	-1.00764	-1.18314	-1.23309	-1.41702	-1.72404	10.8945	33.3934	6.21608e-11	2.30369e-10
200779_at	ATF4	activating transcription factor 4 (tax-responsive enhancer element B67)	468	-1.27733	-1.51952	-1.25041	-1.23612	-1.33066	-1.41404	-1.65958	11.7221	19.1003	2.02565e-08	4.88442e-08
200780_x_at	GNAS	GNAS complex locus	2778	1.7609	1.5212	1.84377	2.05468	2.22001	2.13365	1.9902	12.7914	81.4979	2.87762e-15	2.70556e-14
200782_at	ANXA5	annexin A5	308	-1.81286	-2.16206	-2.05004	-2.18144	-2.54705	-2.39874	-2.75595	11.3661	80.1007	3.51163e-15	3.22222e-14
200783_s_at	STMN1	stathmin 1	3925	-1.12368	1.15586	1.09599	1.08043	1.14405	-1.11764	1.41643	10.5837	21.8748	5.20137e-09	1.37587e-08
200785_s_at	LOC100134190 /// LRP1	similar to low density lipoprotein-related protein 1 (alpha-2-macroglobulin receptor) /// low density lipoprotein-related protein 1 (alpha-2-macroglobulin receptor)	100134190 /// 4035	1.0999	-1.21573	-1.08228	-1.13808	-1.15472	1.05375	1.01197	6.79106	6.32628	0.000272734	0.00039705
200786_at	PSMB7	proteasome (prosome, macropain) subunit, beta type, 7	5695	-1.33214	-1.37899	-1.3051	-1.39037	-1.47821	-1.58085	-1.46366	11.4424	15.7389	1.32768e-07	2.84107e-07
200787_s_at	PEA15	phosphoprotein enriched in astrocytes 15	8682	-1.58899	-1.9077	-1.67105	-1.56657	-1.40454	-1.35867	-1.03754	7.32165	32.0798	9.56167e-11	3.42086e-10
200788_s_at	PEA15	phosphoprotein enriched in astrocytes 15	8682	-1.70727	-1.92802	-1.59891	-1.29102	-1.07139	-1.02887	1.46856	9.83781	69.8168	1.69793e-14	1.32697e-13
200789_at	ECH1	enoyl Coenzyme A hydratase 1, peroxisomal	1891	1.24218	1.17947	1.11189	1.29383	1.10695	1.37026	1.31545	9.24805	7.68243	6.53491e-05	0.000101392
200790_at	ODC1	ornithine decarboxylase 1	4953	-1.34738	-1.37347	1.0628	1.19274	1.16054	1.33386	1.06827	12.132	59.5735	1.03168e-13	6.78994e-13
200791_s_at	IQGAP1	IQ motif containing GTPase activating protein 1	8826	-1.44533	-1.78751	-1.91407	-1.75469	-2.31392	-2.26849	-2.60088	9.14129	69.3606	1.82997e-14	1.42e-13
200792_at	XRCC6	X-ray repair complementing defective repair in Chinese hamster cells 6	2547	1.06687	-1.12234	-1.06785	-1.16268	-1.15008	-1.24891	-1.21612	11.6544	9.49795	1.20443e-05	2.01822e-05
200793_s_at	ACO2	aconitase 2, mitochondrial	50	1.08299	-1.17707	-1.01181	1.11991	1.09106	1.11205	1.25325	8.21639	11.1436	3.09966e-06	5.56496e-06
200794_x_at	DAZAP2	DAZ associated protein 2	9802	-1.17253	-1.02762	1.10488	2.12739	2.91911	2.66852	3.73798	9.70904	272.943	1.92993e-21	1.07696e-19
200795_at	SPARCL1	SPARC-like 1 (hevin)	8404	-1.51033	-1.67767	-2.13044	1.08832	1.1424	2.829	3.64055	6.47842	274.196	1.82732e-21	1.02563e-19
200797_s_at	MCL1	myeloid cell leukemia sequence 1 (BCL2-related)	4170	1.06743	-1.15792	-1.08905	-1.11257	-1.05956	-1.37231	-1.10399	10.6566	11.0779	3.26321e-06	5.83775e-06
200798_x_at	MCL1	myeloid cell leukemia sequence 1 (BCL2-related)	4170	1.14296	-1.43268	-1.53998	-1.91164	-1.89389	-3.07241	-3.14812	8.77721	161.32	9.91801e-19	2.41035e-17
200799_at	HSPA1A	heat shock 70kDa protein 1A	3303	1.29852	1.31557	1.24656	1.50117	1.90034	1.12918	1.77753	9.50113	34.9683	3.78185e-11	1.45565e-10
200800_s_at	HSPA1A /// HSPA1B	heat shock 70kDa protein 1A /// heat shock 70kDa protein 1B	3303 /// 3304	1.57684	1.58341	1.58109	1.75876	1.95755	1.28221	1.90423	8.94006	16.5237	8.33498e-08	1.83585e-07
200801_x_at	ACTB	actin, beta	60	1.15554	-1.27299	-1.18078	-1.12865	-1.00699	-1.02647	-1.11008	13.1665	19.1504	1.97373e-08	4.76853e-08
200802_at	SARS	seryl-tRNA synthetase	6301	-1.53904	-1.61531	-1.37959	-1.24947	-1.35992	-1.45293	-1.3649	9.98099	19.7214	1.47414e-08	3.63261e-08
200803_s_at	TMBIM6	transmembrane BAX inhibitor motif containing 6	7009	-1.13816	1.08521	1.15025	-1.0249	-1.27754	-1.25141	-1.33211	10.5409	26.7917	6.4369e-10	1.98119e-09
200804_at	TMBIM6	transmembrane BAX inhibitor motif containing 6	7009	-1.013	-1.1438	-1.01529	1.06059	1.10931	1.0271	1.20333	10.9285	8.55617	2.81471e-05	4.5371e-05
200805_at	LMAN2	lectin, mannose-binding 2	10960	1.05826	-1.18387	-1.18044	-1.03462	-1.25104	-1.1038	-1.25811	8.5014	6.66634	0.000187739	0.00027752
200806_s_at	HSPD1	heat shock 60kDa protein 1 (chaperonin)	3329	-1.09354	-1.17918	-1.08132	-1.43318	-1.49237	-2.14776	-2.31316	12.1977	60.925	8.00242e-14	5.38709e-13
200807_s_at	HSPD1	heat shock 60kDa protein 1 (chaperonin)	3329	-1.07652	-1.21912	-1.22637	-1.43098	-1.43298	-1.76237	-1.65987	13.21	54.4737	2.83146e-13	1.69293e-12
200808_s_at	ZYX	zyxin	7791	-1.05275	-1.30791	-1.2482	-1.32615	-1.39499	-1.33425	-1.27236	6.62553	6.81994	0.000159151	0.000237017
200809_x_at	RPL12	ribosomal protein L12	6136	-1.19662	-1.14643	-1.16113	-1.26042	-1.40095	-1.33751	-1.41063	13.6067	19.3893	1.74535e-08	4.25163e-08
200810_s_at	CIRBP	cold inducible RNA binding protein	1153	1.2464	-1.34397	-1.22249	1.35369	1.62906	1.82941	1.48866	10.6593	67.4768	2.5057e-14	1.88662e-13
200811_at	CIRBP	cold inducible RNA binding protein	1153	1.2782	-1.26824	-1.15644	1.36884	1.60956	1.89729	1.4478	9.34338	53.6828	3.33738e-13	1.96239e-12
200812_at	CCT7	chaperonin containing TCP1, subunit 7 (eta)	10574	-1.11421	-1.21198	-1.09369	-1.13963	-1.19789	-1.33702	-1.24903	11.369	6.15649	0.000329987	0.000476601
200813_s_at	PAFAH1B1	platelet-activating factor acetylhydrolase, isoform Ib, subunit 1 (45kDa)	5048	1.51098	1.23735	1.23686	1.55162	1.90291	1.62451	1.93658	8.46772	33.7508	5.54306e-11	2.07024e-10
200814_at	PSME1	proteasome (prosome, macropain) activator subunit 1 (PA28 alpha)	5720	-1.06704	-1.39445	-1.5132	-1.32517	-1.36168	-1.1715	-1.17291	9.36836	17.7673	4.12568e-08	9.49777e-08
200815_s_at	PAFAH1B1	platelet-activating factor acetylhydrolase, isoform Ib, subunit 1 (45kDa)	5048	-1.18283	-1.46338	-1.35288	-1.50749	-1.73292	-1.54862	-2.34386	8.38556	27.9009	4.20591e-10	1.33525e-09
200816_s_at	PAFAH1B1	platelet-activating factor acetylhydrolase, isoform Ib, subunit 1 (45kDa)	5048	1.37566	1.37289	1.57336	1.90594	2.26711	1.69128	2.25513	9.71719	73.3989	9.57829e-15	7.94291e-14
200817_x_at	RPS10	ribosomal protein S10	6204	-1.17048	-1.1926	-1.18384	-1.26015	-1.36329	-1.31388	-1.3381	13.8339	14.9662	2.13785e-07	4.43849e-07
200818_at	ATP5O	ATP synthase, H+ transporting, mitochondrial F1 complex, O subunit	539	-1.25012	-1.1493	-1.18018	-1.22996	-1.34058	-1.34381	-1.13645	12.4679	10.785	4.11516e-06	7.27157e-06
200821_at	LAMP2	lysosomal-associated membrane protein 2	3920	1.07786	-1.08967	-1.10638	1.33394	1.46991	1.29309	1.10341	9.04412	16.4103	8.905e-08	1.95228e-07
200822_x_at	TPI1	triosephosphate isomerase 1	7167	1.0204	-1.36537	-1.41398	-1.61278	-1.68484	-1.28203	-1.757	11.3012	40.3006	8.06194e-12	3.51943e-11
200823_x_at	RPL29	ribosomal protein L29	6159	-1.30232	-1.20321	-1.1568	-1.20431	-1.34633	-1.33832	-1.25202	12.7817	10.1829	6.72312e-06	1.16147e-05
200824_at	GSTP1	glutathione S-transferase pi 1	2950	-1.04309	-1.42887	-1.37311	-1.50376	-1.73056	-1.58305	-1.92918	11.7166	48.0319	1.15826e-12	6.01419e-12
200825_s_at	HYOU1	hypoxia up-regulated 1	10525	1.5672	1.21197	1.23811	1.04745	1.05925	-1.16569	-1.26982	9.04392	52.5606	4.23053e-13	2.42757e-12
200826_at	SNRPD2	small nuclear ribonucleoprotein D2 polypeptide 16.5kDa	6633	-1.33845	-1.25899	-1.26295	-1.4238	-1.56372	-1.53269	-1.52057	12.3898	28.082	3.9291e-10	1.25243e-09
200827_at	PLOD1	procollagen-lysine 1, 2-oxoglutarate 5-dioxygenase 1	5351	1.03119	-1.10776	-1.0191	1.21426	1.07696	1.51423	1.12263	7.41683	15.9781	1.14984e-07	2.47871e-07
200828_s_at	ZNF207	zinc finger protein 207	7756	-1.00504	-1.08087	-1.07507	-1.22189	-1.25012	-1.59808	-1.50586	10.8152	33.0238	7.00587e-11	2.56813e-10
200829_x_at	ZNF207	zinc finger protein 207	7756	1.00478	-1.08809	-1.1412	-1.24841	-1.20833	-1.53926	-1.32977	10.832	25.2165	1.20997e-09	3.5626e-09
200830_at	PSMD2	proteasome (prosome, macropain) 26S subunit, non-ATPase, 2	5708	1.07673	-1.29991	-1.18964	-1.13777	-1.08219	-1.22121	-1.20703	10.2013	8.8286	2.18877e-05	3.56984e-05
200831_s_at	SCD	stearoyl-CoA desaturase (delta-9-desaturase)	6319	1.13684	-1.14484	1.00945	-1.07303	-1.21637	-1.11458	-1.29658	8.45994	13.2027	6.83304e-07	1.32884e-06
200832_s_at	SCD	stearoyl-CoA desaturase (delta-9-desaturase)	6319	1.28676	-1.08014	-1.02945	1.12562	1.4333	1.32401	1.24664	10.9645	29.8269	2.07765e-10	6.98051e-10
200833_s_at	hCG_1757335 /// RAP1B	hCG1757335 /// RAP1B, member of RAS oncogene family	5908 /// 643752	-1.04781	1.01088	1.04927	1.34184	1.07361	1.06575	-1.04979	11.2628	9.54878	1.15233e-05	1.93555e-05
200834_s_at	RPS21	ribosomal protein S21	6227	-1.21743	-1.09232	-1.11004	-1.14089	-1.28625	-1.24258	-1.15273	13.5434	8.68429	2.49913e-05	4.0488e-05
200835_s_at	MAP4	microtubule-associated protein 4	4134	1.20721	-1.21704	1.03541	1.18312	1.09446	1.03852	-1.38779	8.29585	14.6619	2.59239e-07	5.31957e-07
200836_s_at	MAP4	microtubule-associated protein 4	4134	1.32521	-1.04603	1.03925	1.22903	1.04682	1.09587	-1.11071	6.93427	11.5016	2.35069e-06	4.2758e-06
200837_at	BCAP31	B-cell receptor-associated protein 31	10134	-1.03891	-1.00893	1.10549	1.03033	-1.14204	-1.27883	-1.21879	9.491	7.22384	0.000104093	0.000157805
200838_at	CTSB	cathepsin B	1508	-1.17402	-1.05281	1.17986	1.87704	1.36802	1.55586	1.40044	9.0013	41.6203	5.65876e-12	2.54796e-11
200839_s_at	CTSB	cathepsin B	1508	-1.40107	-1.14126	1.24609	2.00341	1.4004	1.77181	1.5986	9.50821	100.453	2.55775e-16	3.15233e-15
200840_at	KARS	lysyl-tRNA synthetase	3735	-1.11125	-1.25641	-1.21221	-1.26012	-1.38464	-1.49389	-1.46274	12.3186	23.2744	2.76413e-09	7.65857e-09
200841_s_at	EPRS	glutamyl-prolyl-tRNA synthetase	2058	-1.48766	-1.31478	-1.22688	-1.57487	-1.59911	-1.74762	-1.82607	8.03214	16.5987	7.9797e-08	1.76133e-07
200842_s_at	EPRS	glutamyl-prolyl-tRNA synthetase	2058	-1.04155	-1.24706	-1.08394	-1.18641	-1.30659	-1.58962	-1.41751	10.547	18.0331	3.56817e-08	8.29238e-08
200843_s_at	EPRS	glutamyl-prolyl-tRNA synthetase	2058	-1.1671	-1.31816	-1.25339	-1.33863	-1.38825	-1.56548	-1.47517	9.952	15.3235	1.71124e-07	3.60385e-07
200844_s_at	PRDX6	peroxiredoxin 6	9588	-1.27393	-1.24828	-1.19806	-1.26949	-1.54905	-1.46166	-1.93507	11.7575	41.908	5.24566e-12	2.38223e-11
200845_s_at	PRDX6	peroxiredoxin 6	9588	-1.21939	-1.23578	-1.14969	-1.12278	-1.23462	-1.27094	-1.43961	11.499	13.8866	4.29723e-07	8.57495e-07
200846_s_at	PPP1CA	protein phosphatase 1, catalytic subunit, alpha isoform	5499	1.04288	-1.14168	-1.12462	1.01798	-1.16303	-1.18347	-1.41452	9.29363	6.48098	0.000229816	0.000336916
200847_s_at	TMEM66	transmembrane protein 66	51669	1.00684	1.03854	1.12438	1.81695	1.71633	2.47	3.20744	11.3884	91.8371	7.24124e-16	7.95309e-15
200848_at	AHCYL1	S-adenosylhomocysteine hydrolase-like 1	10768	1.10534	1.03622	1.19199	1.42616	1.16563	1.22339	-1.00287	9.48513	7.62298	6.93482e-05	0.000107359
200849_s_at	AHCYL1	S-adenosylhomocysteine hydrolase-like 1	10768	1.09039	-1.04125	1.12563	1.39106	1.18332	1.22503	1.08672	9.33045	13.8501	4.40318e-07	8.77152e-07
200850_s_at	AHCYL1	S-adenosylhomocysteine hydrolase-like 1	10768	1.06045	-1.04794	1.13685	1.31896	1.20764	1.1346	1.01114	9.80854	9.47911	1.22438e-05	2.05019e-05
200852_x_at	GNB2	guanine nucleotide binding protein (G protein), beta polypeptide 2	2783	-1.00275	-1.42285	-1.36749	-1.0488	-1.02443	1.00757	-1.08753	8.39804	9.14462	1.64504e-05	2.72033e-05
200853_at	H2AFZ	H2A histone family, member Z	3015	-1.13649	-1.18321	-1.14196	-1.2436	-1.24727	-1.49476	-1.43578	12.9552	19.6765	1.50799e-08	3.71004e-08
200854_at	NCOR1	nuclear receptor co-repressor 1	9611	1.53551	1.14698	1.24483	1.3994	1.58055	1.2344	1.34306	8.24778	18.1955	3.26801e-08	7.63587e-08
200857_s_at	NCOR1	nuclear receptor co-repressor 1	9611	1.46491	1.26776	1.41844	1.36105	1.40043	1.28526	1.1458	8.36549	7.00899	0.00013024	0.000195635
200859_x_at	FLNA	filamin A, alpha (actin binding protein 280)	2316	1.21326	-1.23259	-1.15744	-1.10897	-1.20656	-1.14476	-1.53964	6.95625	22.0568	4.782e-09	1.27404e-08
200860_s_at	CNOT1	CCR4-NOT transcription complex, subunit 1	23019	1.14075	-1.10754	-1.07655	-1.22393	-1.13802	-1.39453	-1.49019	10.0145	24.5657	1.58602e-09	4.5778e-09
200861_at	CNOT1	CCR4-NOT transcription complex, subunit 1	23019	1.12694	-1.11736	-1.21242	-1.23104	-1.14812	-1.24955	-1.26814	6.85092	9.75987	9.60616e-06	1.62819e-05
200862_at	DHCR24	24-dehydrocholesterol reductase	1718	1.09408	-1.39695	-1.53452	-1.6848	-1.51163	-1.6012	-1.58022	9.63406	48.9728	9.33018e-13	4.93656e-12
200863_s_at	RAB11A	RAB11A, member RAS oncogene family	8766	-1.47051	-1.37312	-1.3645	-1.5907	-1.79809	-1.79855	-1.68926	11.3032	49.8629	7.63059e-13	4.12743e-12
200864_s_at	RAB11A	RAB11A, member RAS oncogene family	8766	-1.05967	-1.1631	-1.36478	-1.13271	1.01754	-1.21562	1.18712	9.27264	5.85712	0.000464951	0.000661545
200866_s_at	PSAP	prosaposin	5660	1.25725	1.173	1.20311	1.37965	1.17624	1.2026	1.28683	8.91331	5.5643	0.000656002	0.000919651
200867_at	RNF114	ring finger protein 114	55905	1.12037	-1.37922	-1.38558	-1.1473	-1.08443	-1.29624	-1.25363	8.37165	13.4323	5.83614e-07	1.14424e-06
200868_s_at	RNF114	ring finger protein 114	55905	-1.20354	-1.59151	-1.54065	-1.67346	-1.94318	-1.65351	-2.57575	8.46094	85.1238	1.74193e-15	1.74267e-14
200870_at	STRAP	serine/threonine kinase receptor associated protein	11171	1.18376	-1.00904	-1.01035	1.00372	1.00547	-1.06681	-1.05851	12.0559	7.68091	6.54484e-05	0.000101534
200871_s_at	PSAP	prosaposin	5660	1.28031	1.17203	1.17405	1.28174	1.29065	1.26286	1.41125	10.681	10.4621	5.34166e-06	9.32319e-06
200872_at	S100A10	S100 calcium binding protein A10	6281	-2.86975	-2.09656	-1.36333	1.19857	-1.50775	1.00473	-1.81311	11.6673	159.068	1.17073e-18	2.79028e-17
200873_s_at	CCT8	chaperonin containing TCP1, subunit 8 (theta)	10694	-1.07217	-1.09873	-1.10362	-1.22997	-1.29366	-1.41541	-1.32891	12.2072	13.4751	5.66873e-07	1.1136e-06
200874_s_at	NOP56	NOP56 ribonucleoprotein homolog (yeast)	10528	1.13367	-1.17077	-1.20134	-1.32968	-1.3899	-1.70543	-1.5191	8.70438	31.7039	1.08466e-10	3.83611e-10
200875_s_at	NOP56	NOP56 ribonucleoprotein homolog (yeast)	10528	1.11255	-1.1721	-1.26465	-1.47975	-1.44687	-2.20028	-1.99865	11.1235	70.3617	1.55358e-14	1.22338e-13
200876_s_at	PSMB1	proteasome (prosome, macropain) subunit, beta type, 1	5689	-1.13314	-1.34471	-1.31772	-1.4185	-1.53709	-1.54397	-1.71843	12.16	43.6433	3.35327e-12	1.5882e-11
200877_at	CCT4	chaperonin containing TCP1, subunit 4 (delta)	10575	-1.09438	-1.12017	-1.06914	-1.23776	-1.31716	-1.49924	-1.50493	12.0869	28.2064	3.75038e-10	1.20004e-09
200878_at	EPAS1	endothelial PAS domain protein 1	2034	-1.151	9.55195	8.49281	6.20013	3.89291	6.23595	4.5419	9.75969	431.337	8.09754e-24	1.01931e-21
200880_at	DNAJA1	DnaJ (Hsp40) homolog, subfamily A, member 1	3301	-1.01911	1.19683	1.3028	1.31552	1.51725	-1.05115	1.85002	11.411	39.5093	1.00185e-11	4.28698e-11
200881_s_at	DNAJA1	DnaJ (Hsp40) homolog, subfamily A, member 1	3301	-1.14009	1.12523	1.29011	1.11238	1.16933	-1.70818	1.09933	11.6022	50.2242	7.03905e-13	3.84192e-12
200882_s_at	PSMD4	proteasome (prosome, macropain) 26S subunit, non-ATPase, 4	5710	-1.16857	-1.27427	-1.2627	-1.30853	-1.43499	-1.49562	-1.51348	10.1588	10.027	7.65863e-06	1.31416e-05
200883_at	UQCRC2	ubiquinol-cytochrome c reductase core protein II	7385	-1.35816	-1.56566	-1.565	-1.46633	-1.59021	-1.51405	-1.41642	10.1985	13.2555	6.58843e-07	1.28356e-06
200884_at	CKB	creatine kinase, brain	1152	1.48071	-1.06362	1.04762	1.4845	2.14739	2.02366	2.55737	10.2104	128.181	1.48434e-17	2.55801e-16
200885_at	RHOC	ras homolog gene family, member C	389	-1.85352	-1.34355	-1.10882	1.12446	-1.21487	1.01644	-1.31387	8.84433	31.8826	1.02136e-10	3.62906e-10
200886_s_at	PGAM1	phosphoglycerate mutase 1 (brain)	5223	1.00287	-1.34061	-1.5056	-1.71401	-1.82187	-1.38064	-2.52048	12.3004	137.598	6.4575e-18	1.24037e-16
200887_s_at	STAT1	signal transducer and activator of transcription 1, 91kDa	6772	-1.11079	-1.13888	-1.12287	-1.19931	-1.16172	-1.39308	-1.42228	9.06231	9.37049	1.34658e-05	2.24612e-05
200888_s_at	RPL23	ribosomal protein L23	9349	-1.24588	-1.0058	-1.05065	-1.09222	-1.15201	-1.14742	-1.09815	13.1732	7.49726	7.87031e-05	0.00012104
200889_s_at	SSR1	signal sequence receptor, alpha	6745	-1.68829	-1.39867	-1.2466	-1.36865	-1.73545	-1.81813	-1.56288	9.08861	31.6316	1.11146e-10	3.92606e-10
200890_s_at	SSR1	signal sequence receptor, alpha	6745	-1.62302	-1.45001	-1.49679	-1.54948	-1.78946	-1.9136	-1.81247	8.27489	13.3762	6.06447e-07	1.18658e-06
200892_s_at	TRA2B	transformer 2 beta homolog (Drosophila)	6434	1.10265	1.01852	-1.04823	-1.13118	-1.04655	-1.48918	-1.41277	11.3293	31.4976	1.16301e-10	4.09199e-10
200893_at	TRA2B	transformer 2 beta homolog (Drosophila)	6434	1.06939	1.05011	1.00218	-1.00419	1.06239	-1.32462	-1.07326	11.9162	13.7341	4.75837e-07	9.43992e-07
200894_s_at	FKBP4	FK506 binding protein 4, 59kDa	2288	-1.11908	-1.35084	-1.25461	-1.53945	-1.63366	-1.86549	-1.6822	7.75603	24.8925	1.38341e-09	4.03978e-09
200895_s_at	FKBP4	FK506 binding protein 4, 59kDa	2288	1.16484	1.04223	1.0487	-1.12691	-1.12466	-1.24435	-1.13468	9.01441	16.1291	1.05101e-07	2.27855e-07
200896_x_at	HDGF	hepatoma-derived growth factor (high-mobility group protein 1-like)	3068	1.39822	1.10435	1.24026	1.18712	1.26254	1.24562	1.02652	10.5002	13.0477	7.60908e-07	1.47028e-06
200897_s_at	PALLD	palladin, cytoskeletal associated protein	23022	-1.13369	1.06868	1.28038	1.56143	1.52867	1.48224	1.16909	9.93985	36.172	2.62136e-11	1.03841e-10
200898_s_at	MGEA5	meningioma expressed antigen 5 (hyaluronidase)	10724	1.13855	1.06584	1.29608	1.04596	1.05834	1.03994	-1.51537	7.89929	29.8383	2.06929e-10	6.95602e-10
200900_s_at	M6PR	mannose-6-phosphate receptor (cation dependent)	4074	1.0691	1.06528	1.00407	-1.11609	-1.31227	-1.60547	-1.4273	8.62752	12.8736	8.59646e-07	1.65073e-06
200901_s_at	M6PR	mannose-6-phosphate receptor (cation dependent)	4074	-1.06998	-1.11729	-1.07959	-1.22718	-1.26699	-1.42627	-1.33988	8.71622	12.8383	8.81271e-07	1.6895e-06
200903_s_at	AHCY	S-adenosylhomocysteine hydrolase	191	1.37324	1.04874	-1.04782	1.0817	1.00493	1.18487	-1.24287	9.57991	20.1171	1.20907e-08	3.01755e-08
200904_at	HLA-E	major histocompatibility complex, class I, E	3133	-1.21171	-1.33534	-1.40644	-1.1387	-1.39684	-1.09972	-1.06399	7.06219	7.58241	7.22285e-05	0.000111559
200906_s_at	PALLD	palladin, cytoskeletal associated protein	23022	-1.14253	-1.05798	1.22205	1.4912	1.39924	1.32596	1.06895	8.60039	34.3447	4.5931e-11	1.74077e-10
200907_s_at	PALLD	palladin, cytoskeletal associated protein	23022	-1.10217	1.09441	1.38028	1.67886	1.54533	1.34273	1.04397	9.52266	29.2651	2.54152e-10	8.39757e-10
200910_at	CCT3	chaperonin containing TCP1, subunit 3 (gamma)	7203	-1.01127	-1.08719	-1.06348	-1.22403	-1.30153	-1.52254	-1.37346	11.1103	24.6133	1.55462e-09	4.49569e-09
200911_s_at	TACC1	transforming, acidic coiled-coil containing protein 1	6867	-1.02754	1.26944	1.47061	1.25547	1.32416	-1.05684	1.06533	8.31743	18.8422	2.31727e-08	5.53716e-08
200912_s_at	EIF4A2	eukaryotic translation initiation factor 4A, isoform 2	1974	1.00371	1.33868	1.45377	1.42425	1.36973	1.41069	1.75379	12.5605	43.5367	3.44511e-12	1.62753e-11
200913_at	PPM1G	protein phosphatase 1G (formerly 2C), magnesium-dependent, gamma isoform	5496	1.30701	-1.21486	-1.17215	-1.14081	-1.1556	-1.29274	-1.29354	9.27505	22.7834	3.43766e-09	9.37349e-09
200914_x_at	KTN1	kinectin 1 (kinesin receptor)	3895	1.13013	1.51496	1.27377	1.34852	1.21681	-1.05759	-1.07439	10.5613	7.72259	6.27885e-05	9.76121e-05
200915_x_at	KTN1	kinectin 1 (kinesin receptor)	3895	1.1404	1.43218	1.50321	1.39659	1.32072	1.04348	1.06117	10.9137	13.8805	4.31489e-07	8.60753e-07
200916_at	TAGLN2	transgelin 2	8407	-1.78339	-2.09318	-2.0885	-2.17823	-2.75789	-2.3346	-3.15566	8.88605	112.255	7.01075e-17	1.01432e-15
200918_s_at	SRPR	signal recognition particle receptor (docking protein)	6734	1.24818	-1.03781	-1.04704	1.19668	1.20855	1.22492	1.0957	7.74832	9.27828	1.46069e-05	2.42849e-05
200919_at	PHC2	polyhomeotic homolog 2 (Drosophila)	1912	1.11783	1.3646	1.65909	2.08545	2.20489	2.00564	2.32097	9.56869	63.2882	5.19638e-14	3.63887e-13
200920_s_at	BTG1	B-cell translocation gene 1, anti-proliferative	694	1.20875	1.35247	1.26189	1.96576	2.47384	2.34879	2.91646	8.87068	74.3821	8.22348e-15	6.93022e-14
200921_s_at	BTG1	B-cell translocation gene 1, anti-proliferative	694	1.27253	1.25309	1.18544	1.76597	2.35218	2.35916	3.06249	10.3703	102.673	1.98341e-16	2.5224e-15
200923_at	LGALS3BP /// LOC100133842	lectin, galactoside-binding, soluble, 3 binding protein /// similar to lectin, galactoside-binding, soluble, 3 binding protein	100133842 /// 3959	1.34776	1.05845	1.03889	1.05117	1.12366	1.55673	1.84395	6.95884	29.2721	2.53513e-10	8.38072e-10
200924_s_at	SLC3A2	solute carrier family 3 (activators of dibasic and neutral amino acid transport), member 2	6520	-1.18577	-1.45083	-1.14656	-1.37566	-1.57223	-1.58183	-2.30771	8.88649	27.1336	5.63648e-10	1.75251e-09
200925_at	COX6A1	cytochrome c oxidase subunit VIa polypeptide 1	1337	-1.41442	-1.34159	-1.37833	-1.43084	-1.52455	-1.43474	-1.2665	12.0653	18.6263	2.5963e-08	6.16018e-08
200927_s_at	RAB14	RAB14, member RAS oncogene family	51552	1.17059	-1.02519	1.13758	1.31204	1.45065	1.27366	1.50102	8.74342	15.1017	1.9639e-07	4.09668e-07
200929_at	TMED10	transmembrane emp24-like trafficking protein 10 (yeast)	10972	-1.22369	-1.29084	-1.28958	-1.2473	-1.39754	-1.36033	-1.40333	9.89741	12.302	1.29424e-06	2.43284e-06
200931_s_at	VCL	vinculin	7414	-1.22249	-2.5219	-2.68232	-2.43807	-2.65188	-2.69817	-4.54529	10.9302	254.196	4.50696e-21	2.23035e-19
200932_s_at	DCTN2	dynactin 2 (p50)	10540	1.1738	1.06306	1.16425	1.45288	1.51836	1.61399	1.6945	9.2637	35.1723	3.55133e-11	1.37406e-10
200934_at	DEK	DEK oncogene	7913	1.42693	1.27481	1.25511	1.05534	1.23668	-1.07457	-1.03141	11.9852	18.5677	2.67819e-08	6.33536e-08
200940_s_at	RERE	arginine-glutamic acid dipeptide (RE) repeats	473	2.00579	1.60594	2.02809	2.16275	2.25226	2.30272	2.02414	8.87486	53.9249	3.17283e-13	1.87756e-12
200941_at	HSBP1	heat shock factor binding protein 1	3281	-1.33668	-1.15339	-1.0367	1.05205	1.12198	1.01897	1.65642	10.7618	36.0748	2.69902e-11	1.06706e-10
200942_s_at	HSBP1	heat shock factor binding protein 1	3281	-1.34731	-1.17126	-1.15839	-1.21387	-1.3422	-1.39273	-1.29012	11.7017	10.6901	4.44046e-06	7.81602e-06
200943_at	HMGN1	high-mobility group nucleosome binding domain 1	3150	1.04205	1.0501	1.04963	-1.0563	1.02684	-1.06183	-1.19918	12.2258	7.96548	4.94362e-05	7.76221e-05
200944_s_at	HMGN1	high-mobility group nucleosome binding domain 1	3150	1.00984	-1.00854	1.06124	-1.06663	-1.01009	-1.17127	-1.2126	12.7581	8.92449	2.0057e-05	3.28407e-05
200945_s_at	SEC31A	SEC31 homolog A (S. cerevisiae)	22872	-1.20585	-1.21441	-1.17222	1.15779	1.09502	1.05037	-1.00982	10.2481	7.70696	6.37718e-05	9.90576e-05
200946_x_at	GLUD1	glutamate dehydrogenase 1	2746	-1.19563	-1.168	-1.18087	1.09065	-1.31	-1.17744	-1.1965	8.86882	10.7755	4.14663e-06	7.3228e-06
200947_s_at	GLUD1	glutamate dehydrogenase 1	2746	-1.20039	-1.19589	-1.22802	1.03299	-1.24258	-1.03151	-1.01267	9.66925	14.7594	2.43637e-07	5.02007e-07
200948_at	MLF2	myeloid leukemia factor 2	8079	-1.0626	-1.72898	-1.42005	-1.39091	-1.48871	-1.51616	-1.50365	7.50044	21.0691	7.60156e-09	1.95746e-08
200949_x_at	RPS20	ribosomal protein S20	6224	-1.24821	-1.14107	-1.1875	-1.23276	-1.35274	-1.32363	-1.36757	13.5052	16.6316	7.82885e-08	1.73098e-07
200951_s_at	CCND2	cyclin D2	894	-3.09357	-3.54975	-2.91028	-2.93783	-2.49222	-3.02835	-3.67607	8.05139	78.5814	4.37702e-15	3.92871e-14
200953_s_at	CCND2	cyclin D2	894	-1.41797	-1.65512	-1.22306	-1.00591	1.46888	1.14575	-1.02015	10.8695	84.2169	1.97111e-15	1.9442e-14
200954_at	ATP6V0C	ATPase, H+ transporting, lysosomal 16kDa, V0 subunit c	527	1.16202	-1.159	-1.13318	-1.14968	-1.11613	1.00421	1.0177	8.95534	11.2948	2.75582e-06	4.97468e-06
200955_at	IMMT	inner membrane protein, mitochondrial (mitofilin)	10989	-1.16214	-1.42742	-1.40118	-1.32931	-1.34055	-1.52634	-1.36317	10.0224	17.074	6.07561e-08	1.36688e-07
200956_s_at	SSRP1	structure specific recognition protein 1	6749	1.51894	1.16206	1.31317	1.30837	1.42067	1.16186	-1.05728	9.42101	11.3486	2.64375e-06	4.78133e-06
200957_s_at	SSRP1	structure specific recognition protein 1	6749	1.41464	1.03908	1.10159	1.15446	1.25449	1.17735	-1.01041	9.71823	11.2688	2.81191e-06	5.07134e-06
200958_s_at	SDCBP	syndecan binding protein (syntenin)	6386	-1.4695	-1.19074	-1.08803	-1.02247	-1.04719	-1.12504	-1.08419	10.8727	10.189	6.68913e-06	1.15583e-05
200959_at	FUS	fusion (involved in t(12;16) in malignant liposarcoma)	2521	2.60691	2.09854	2.00483	2.25921	2.36547	1.98403	1.7071	10.8927	39.9713	8.82066e-12	3.81659e-11
200960_x_at	CLTA	clathrin, light chain (Lca)	1211	-1.09596	-1.30927	-1.28669	-1.28729	-1.43293	-1.33185	-1.50234	11.3443	13.4483	5.77301e-07	1.13272e-06
200961_at	SEPHS2	selenophosphate synthetase 2	22928	-1.10925	-1.6655	-1.74006	-1.69252	-1.85172	-1.94022	-1.84668	9.53702	52.2675	4.50435e-13	2.56539e-12
200962_at	RPL31	ribosomal protein L31	6160	-1.70881	1.10106	1.3349	1.75313	1.62814	1.81874	2.12056	9.80117	145.246	3.41769e-18	7.08427e-17
200964_at	UBA1	ubiquitin-like modifier activating enzyme 1	7317	1.35469	1.1407	1.24011	1.42315	1.50105	1.47816	1.49804	8.02271	15.5623	1.47795e-07	3.14215e-07
200966_x_at	ALDOA	aldolase A, fructose-bisphosphate	226	1.23476	-1.56138	-1.6377	-1.61851	-1.73383	-1.05762	-1.96277	10.8816	72.1707	1.16205e-14	9.41363e-14
200967_at	PPIB	peptidylprolyl isomerase B (cyclophilin B)	5479	-1.18508	-1.19004	-1.13135	1.13562	-1.05407	1.04478	1.0509	12.1988	12.2706	1.32418e-06	2.48552e-06
200968_s_at	PPIB	peptidylprolyl isomerase B (cyclophilin B)	5479	-1.14296	-1.15534	-1.0581	1.18069	1.0577	1.156	1.0897	11.116	7.64993	6.75037e-05	0.000104591
200969_at	SERP1	stress-associated endoplasmic reticulum protein 1	27230	1.088	-1.10244	-1.12689	-1.01727	-1.07793	-1.28783	-1.2981	9.44907	9.82305	9.10158e-06	1.54692e-05
200970_s_at	SERP1	stress-associated endoplasmic reticulum protein 1	27230	-1.07706	-1.14614	-1.20871	-1.07617	-1.10752	-1.31854	-1.28886	9.03996	5.78066	0.000508245	0.00072018
200971_s_at	SERP1	stress-associated endoplasmic reticulum protein 1	27230	-1.36904	-1.5449	-1.54439	-1.5084	-2.07968	-2.19856	-2.47783	9.883	85.3933	1.67951e-15	1.68738e-14
200972_at	TSPAN3	tetraspanin 3	10099	1.1122	1.15283	1.31088	1.53378	1.68922	1.63487	1.93246	11.0335	36.729	2.22055e-11	8.91347e-11
200973_s_at	TSPAN3	tetraspanin 3	10099	1.01776	1.10511	1.24661	1.69011	1.73556	1.57023	1.84221	9.91778	34.4421	4.45478e-11	1.69206e-10
200974_at	ACTA2	actin, alpha 2, smooth muscle, aorta	59	-3.7762	-2.52369	-2.29211	1.01369	1.09322	1.01553	-1.46648	8.7768	138.4	6.03103e-18	1.16622e-16
200975_at	PPT1	palmitoyl-protein thioesterase 1	5538	1.04584	-1.14935	-1.24805	-1.45051	-1.35034	-1.57227	-1.54556	10.7065	18.2801	3.12256e-08	7.31645e-08
200976_s_at	TAX1BP1	Tax1 (human T-cell leukemia virus type I) binding protein 1	8887	-1.20408	-1.00686	1.12909	1.1664	1.0461	1.08143	1.18341	10.2307	16.825	7.00275e-08	1.5603e-07
200977_s_at	TAX1BP1	Tax1 (human T-cell leukemia virus type I) binding protein 1	8887	-1.2987	-1.04828	1.03745	1.11473	-1.04586	-1.03746	-1.01983	9.93918	7.96217	4.95959e-05	7.78541e-05
200978_at	MDH1	malate dehydrogenase 1, NAD (soluble)	4190	-1.16426	-1.35789	-1.4651	-1.79148	-1.99868	-2.04	-1.79459	11.6018	71.6938	1.25365e-14	1.00931e-13
200980_s_at	PDHA1	pyruvate dehydrogenase (lipoamide) alpha 1	5160	1.18184	-1.12846	-1.07476	-1.09978	-1.1383	-1.23691	-1.37356	10.1432	14.1749	3.55243e-07	7.16481e-07
200981_x_at	GNAS	GNAS complex locus	2778	1.79113	1.56263	1.86452	2.0687	2.26989	2.17473	2.02297	12.1678	76.7278	5.75858e-15	5.00757e-14
200982_s_at	ANXA6	annexin A6	309	-1.98033	-1.44208	-1.20428	1.19772	-1.21161	-1.0475	-1.72683	8.7823	34.4485	4.44589e-11	1.68967e-10
200983_x_at	CD59	CD59 molecule, complement regulatory protein	966	-2.00904	-2.03606	-1.90192	-1.58588	-2.17286	-1.65409	-1.50714	9.23985	46.9041	1.50882e-12	7.65063e-12
200984_s_at	CD59	CD59 molecule, complement regulatory protein	966	-1.69042	-1.86931	-1.7068	-1.37865	-1.61149	-1.42895	-1.27241	8.90905	27.327	5.23204e-10	1.63697e-09
200985_s_at	CD59	CD59 molecule, complement regulatory protein	966	-1.92741	-2.23983	-2.01716	-1.33448	-1.59918	-1.36038	-1.14035	9.13791	67.3668	2.55273e-14	1.91925e-13
200986_at	SERPING1	serpin peptidase inhibitor, clade G (C1 inhibitor), member 1	710	1.59953	1.70373	1.69438	1.80668	1.81001	2.00256	1.70179	7.49649	26.156	8.27151e-10	2.50307e-09
200987_x_at	PSME3	proteasome (prosome, macropain) activator subunit 3 (PA28 gamma; Ki)	10197	-1.08052	-1.43529	-1.4295	-1.67045	-1.77468	-2.21643	-1.80157	8.25193	54.5785	2.77089e-13	1.66055e-12
200988_s_at	PSME3	proteasome (prosome, macropain) activator subunit 3 (PA28 gamma; Ki)	10197	1.0492	-1.23967	-1.28154	-1.32468	-1.46071	-1.53968	-1.36227	6.31805	10.9154	3.70934e-06	6.58859e-06
200990_at	TRIM28	tripartite motif-containing 28	10155	1.65346	-1.12065	-1.04537	-1.102	-1.08246	-1.27081	-1.31795	8.58129	30.6963	1.5309e-10	5.27266e-10
200992_at	IPO7	importin 7	10527	1.1448	1.26299	1.17109	1.13125	1.05791	-1.23395	-1.01407	10.4639	13.7572	4.68525e-07	9.30341e-07
200993_at	IPO7	importin 7	10527	-1.07731	-1.02031	-1.20006	-1.06063	-1.1259	-1.376	-1.19133	10.3989	6.30867	0.000278142	0.000404629
200994_at	IPO7	importin 7	10527	-1.00895	-1.01786	-1.22594	-1.19315	-1.10674	-1.37297	-1.2263	10.7468	6.26578	0.000291803	0.000423717
200995_at	IPO7	importin 7	10527	-1.04567	-1.10111	-1.23148	-1.17263	-1.05536	-1.39543	-1.07793	9.32167	7.11891	0.000116075	0.000175211
200996_at	ACTR3	ARP3 actin-related protein 3 homolog (yeast)	10096	-1.16283	-1.2871	-1.31356	-1.29849	-1.28485	-1.46462	-1.36717	10.5558	5.98698	0.000400256	0.000573682
200997_at	RBM4	RNA binding motif protein 4	5936	1.13171	1.08304	1.1564	1.19561	1.17679	-1.0735	1.15046	10.9795	7.80998	5.75829e-05	8.98263e-05
200998_s_at	CKAP4	cytoskeleton-associated protein 4	10970	1.02958	-1.18885	1.08733	1.27368	1.24094	1.20127	-1.02606	9.39007	14.3692	3.12973e-07	6.35131e-07
200999_s_at	CKAP4	cytoskeleton-associated protein 4	10970	1.16989	1.04505	1.2955	1.63783	1.6033	1.67112	1.39742	10.877	20.1689	1.1784e-08	2.94611e-08
201000_at	AARS	alanyl-tRNA synthetase	16	1.24005	-1.09535	-1.07811	-1.06011	-1.06765	-1.06684	-1.20648	9.46889	11.1109	3.1801e-06	5.6985e-06
201001_s_at	TMEM189-UBE2V1 /// UBE2V1	TMEM189-UBE2V1 readthrough transcript /// ubiquitin-conjugating enzyme E2 variant 1	387522 /// 7335	-1.15267	-1.56306	-1.4535	-1.50298	-1.68842	-1.8855	-2.61394	8.54127	29.407	2.41468e-10	8.01524e-10
201002_s_at	TMEM189-UBE2V1 /// UBE2V1	TMEM189-UBE2V1 readthrough transcript /// ubiquitin-conjugating enzyme E2 variant 1	387522 /// 7335	1.31233	-1.2257	-1.19343	-1.10384	-1.05953	-1.13705	-1.31104	9.76281	23.865	2.13719e-09	6.03567e-09
201003_x_at	RNPEP /// TMEM189 /// TMEM189-UBE2V1 /// UBE2V1 /// UBE2V1P2	arginyl aminopeptidase (aminopeptidase B) /// transmembrane protein 189 /// TMEM189-UBE2V1 readthrough transcript /// ubiquitin-conjugating enzyme E2 variant 1 /// ubiquitin-conjugating enzyme E2 variant 1 pseudogene 2	387521 /// 387522 /// 6051 /// 730052 /// 7335	-1.09282	-1.28623	-1.20171	-1.19517	-1.21468	-1.17274	-1.45264	8.60921	13.3092	6.34935e-07	1.23952e-06
201004_at	SSR4	signal sequence receptor, delta (translocon-associated protein delta)	6748	-1.31443	1.02285	1.03669	1.09439	-1.06335	1.10882	1.2041	10.9877	16.2002	1.00767e-07	2.18989e-07
201005_at	CD9	CD9 molecule	928	-1.63308	-3.434	-4.80186	-6.55458	-6.35833	-4.69195	-4.79236	9.59996	329.724	2.02019e-22	1.50113e-20
201007_at	HADHB	hydroxyacyl-Coenzyme A dehydrogenase/3-ketoacyl-Coenzyme A thiolase/enoyl-Coenzyme A hydratase (trifunctional protein), beta subunit	3032	-1.33734	-1.45503	-1.3797	-1.01782	-1.06116	-1.1717	-1.11431	9.72155	17.3709	5.1398e-08	1.16912e-07
201008_s_at	TXNIP	thioredoxin interacting protein	10628	-1.82335	-1.25481	-1.19792	1.71753	1.39701	1.40729	1.72362	7.38211	72.7759	1.05608e-14	8.63617e-14
201009_s_at	TXNIP	thioredoxin interacting protein	10628	-1.54737	-1.13728	-1.10272	1.52677	1.19406	1.29282	1.67746	8.92384	55.3805	2.35139e-13	1.43232e-12
201010_s_at	TXNIP	thioredoxin interacting protein	10628	-1.98737	-1.11811	-1.02457	1.99388	1.78314	1.70882	2.66529	9.13734	204.415	6.01698e-20	2.06384e-18
201011_at	RPN1	ribophorin I	6184	-1.27477	-1.23744	-1.25178	-1.26553	-1.39289	-1.42741	-1.29764	10.085	10.2437	6.3923e-06	1.10676e-05
201012_at	ANXA1	annexin A1	301	-10.5183	-14.2045	-9.00553	-5.77039	-6.76028	-6.02136	-7.58839	8.821	386.653	3.00324e-23	3.11509e-21
201013_s_at	PAICS	phosphoribosylaminoimidazole carboxylase, phosphoribosylaminoimidazole succinocarboxamide synthetase	10606	1.00725	-1.15647	-1.23057	-1.59347	-1.55497	-1.8042	-2.26123	11.7794	82.378	2.54261e-15	2.42667e-14
201014_s_at	PAICS	phosphoribosylaminoimidazole carboxylase, phosphoribosylaminoimidazole succinocarboxamide synthetase	10606	-1.00446	-1.29904	-1.41693	-2.12377	-2.32744	-2.55477	-3.9445	10.3166	160.84	1.0273e-18	2.48963e-17
201015_s_at	JUP	junction plakoglobin	3728	1.3496	1.27797	1.39621	1.36593	1.1065	1.2809	1.00154	8.25489	15.9129	1.19562e-07	2.57248e-07
201016_at	EIF1AX	eukaryotic translation initiation factor 1A, X-linked	1964	1.0204	-1.1019	-1.53213	-1.64082	-1.87616	-2.23491	-2.76408	10.3285	27.356	5.17418e-10	1.62024e-09
201017_at	EIF1AX	eukaryotic translation initiation factor 1A, X-linked	1964	-1.01009	-1.01472	-1.11685	-1.25238	-1.23821	-1.69141	-1.53561	9.72585	23.786	2.21133e-09	6.22876e-09
201018_at	EIF1AX	eukaryotic translation initiation factor 1A, X-linked	1964	-1.12163	-1.07435	-1.16991	-1.08181	-1.03799	-1.30659	1.09175	9.39978	7.53011	7.61339e-05	0.000117255
201019_s_at	EIF1AP1 /// EIF1AX	eukaryotic translation initiation factor 1A pseudogene 1 /// eukaryotic translation initiation factor 1A, X-linked	1964 /// 280661	1.07417	-1.00701	-1.24294	-1.34702	-1.32004	-1.58251	-1.58775	11.6181	18.3078	3.07643e-08	7.21553e-08
201020_at	YWHAH	tyrosine 3-monooxygenase/tryptophan 5-monooxygenase activation protein, eta polypeptide	7533	1.03656	-1.53631	-1.57329	-1.63928	-1.49743	-1.78719	-1.56859	9.73296	47.0347	1.46287e-12	7.4438e-12
201021_s_at	DSTN	destrin (actin depolymerizing factor)	11034	-1.50675	-1.65145	-1.86067	-1.62383	-2.07958	-1.90738	-2.05837	10.8238	25.357	1.14216e-09	3.37635e-09
201022_s_at	DSTN	destrin (actin depolymerizing factor)	11034	-1.40006	-1.50919	-1.57256	-1.48233	-1.73005	-1.63989	-1.54387	11.7672	27.5312	4.83878e-10	1.52035e-09
201023_at	TAF7	TAF7 RNA polymerase II, TATA box binding protein (TBP)-associated factor, 55kDa	6879	-1.11803	-1.21252	-1.19897	-1.06586	-1.04122	-1.16927	1.12544	10.3299	10.5047	5.15919e-06	9.01685e-06
201024_x_at	EIF5B	eukaryotic translation initiation factor 5B	9669	1.46887	1.32292	1.18365	1.17653	1.17096	-1.09254	1.11203	10.4727	17.9378	3.75805e-08	8.70167e-08
201025_at	EIF5B	eukaryotic translation initiation factor 5B	9669	1.1753	1.00348	-1.08504	-1.17817	-1.10582	-1.38586	-1.24743	7.76359	12.6378	1.01599e-06	1.93533e-06
201026_at	EIF5B	eukaryotic translation initiation factor 5B	9669	1.30232	1.07371	-1.02578	1.00361	-1.0031	-1.14111	-1.13347	7.93193	6.42575	0.000244239	0.000357151
201027_s_at	EIF5B	eukaryotic translation initiation factor 5B	9669	1.28135	-1.00984	-1.02926	-1.1587	-1.2099	-1.59758	-1.6212	8.45313	33.3559	6.29154e-11	2.328e-10
201028_s_at	CD99	CD99 molecule	4267	-2.09775	-1.91481	-1.36154	1.31771	1.05302	1.2785	-1.20846	8.30927	63.4274	5.06834e-14	3.56199e-13
201029_s_at	CD99	CD99 molecule	4267	-2.08688	-1.74742	-1.22315	1.34737	1.21088	1.52571	-1.02632	10.803	130.428	1.21052e-17	2.15591e-16
201030_x_at	LDHB	lactate dehydrogenase B	3945	1.04517	-1.02049	-1.018	-1.14442	-1.21956	-1.31612	-1.30551	13.0078	23.5544	2.44517e-09	6.83104e-09
201031_s_at	HNRNPH1	heterogeneous nuclear ribonucleoprotein H1 (H)	3187	1.3272	1.31103	1.26813	1.32882	1.45619	1.23451	1.24034	12.6604	14.2111	3.46909e-07	7.006e-07
201032_at	BLCAP	bladder cancer associated protein	10904	1.00121	-1.26726	-1.09047	1.04106	1.1719	1.25917	1.74249	8.54507	42.8497	4.10623e-12	1.90685e-11
201034_at	ADD3	adducin 3 (gamma)	120	-1.2644	1.10037	1.18719	1.05155	1.04842	1.0753	-1.20475	10.7106	16.1283	1.0515e-07	2.27943e-07
201035_s_at	HADH	hydroxyacyl-Coenzyme A dehydrogenase	3033	-1.32047	-1.28839	-1.29812	-1.35621	-1.39873	-1.39592	-1.63332	9.07548	14.6934	2.54093e-07	5.22098e-07
201036_s_at	HADH	hydroxyacyl-Coenzyme A dehydrogenase	3033	-1.2459	-1.12139	-1.14438	-1.06087	-1.11097	-1.31036	-1.34165	9.77228	7.25646	0.000100646	0.000152837
201037_at	PFKP	phosphofructokinase, platelet	5214	-1.2655	-1.7025	-1.70274	-1.16948	-2.202	-1.29277	-2.53162	8.74926	87.8511	1.21008e-15	1.25968e-14
201038_s_at	ANP32A	acidic (leucine-rich) nuclear phosphoprotein 32 family, member A	8125	1.26905	-1.02669	-1.0463	-1.01241	1.04999	-1.21659	-1.48359	9.32797	11.0236	3.40564e-06	6.07662e-06
201041_s_at	DUSP1	dual specificity phosphatase 1	1843	-1.02779	-1.4309	-1.11446	1.38393	1.67891	1.68575	2.34383	7.92529	110.157	8.73733e-17	1.22801e-15
201042_at	TGM2	transglutaminase 2 (C polypeptide, protein-glutamine-gamma-glutamyltransferase)	7052	-1.82215	-1.79116	-1.46945	-1.36695	-1.48631	-1.26367	-1.42354	6.94106	12.9588	8.09687e-07	1.55953e-06
201043_s_at	ANP32A /// LOC100128146	acidic (leucine-rich) nuclear phosphoprotein 32 family, member A /// hypothetical protein LOC100128146	100128146 /// 8125	1.39216	1.28634	1.31439	1.04766	1.00463	-1.31531	-1.66131	9.65187	29.18	2.62103e-10	8.62842e-10
201046_s_at	RAD23A	RAD23 homolog A (S. cerevisiae)	5886	1.20472	-1.18331	1.01161	1.03539	1.13651	1.2138	1.10362	8.02734	14.8524	2.29682e-07	4.75253e-07
201047_x_at	RAB6A	RAB6A, member RAS oncogene family	5870	-1.15513	-1.43388	-1.31868	-1.07798	1.13106	1.03026	1.27318	9.93571	17.8077	4.03505e-08	9.31064e-08
201049_s_at	RPS18	ribosomal protein S18	6222	-1.17576	-1.16644	-1.17888	-1.2048	-1.29398	-1.24591	-1.31556	14.2024	9.97717	7.98704e-06	1.3678e-05
201050_at	PLD3	phospholipase D family, member 3	23646	-1.06762	-1.27797	-1.05393	1.03876	-1.07538	1.1449	1.29457	7.23771	10.0649	7.41888e-06	1.2753e-05
201051_at	ANP32A	acidic (leucine-rich) nuclear phosphoprotein 32 family, member A	8125	1.43046	1.49946	1.60625	1.56552	1.59008	1.36259	1.39095	11.6721	32.3368	8.77824e-11	3.16635e-10
201052_s_at	PSMF1	proteasome (prosome, macropain) inhibitor subunit 1 (PI31)	9491	1.094	-1.39367	-1.37762	-1.06997	-1.13684	-1.11253	-1.30421	6.79237	9.24207	1.50832e-05	2.5043e-05
201053_s_at	PSMF1	proteasome (prosome, macropain) inhibitor subunit 1 (PI31)	9491	1.16028	-1.18079	-1.10312	1.45407	1.51416	1.39636	1.61765	8.61625	44.693	2.5781e-12	1.24609e-11
201054_at	HNRNPA0	heterogeneous nuclear ribonucleoprotein A0	10949	1.80075	1.40312	1.51596	1.84021	2.32479	2.04784	2.0801	11.0499	76.7223	5.76334e-15	5.01003e-14
201055_s_at	HNRNPA0	heterogeneous nuclear ribonucleoprotein A0	10949	2.4109	1.50549	1.81164	1.56233	2.07803	1.43624	1.42053	9.3562	47.1312	1.42993e-12	7.29337e-12
201056_at	GOLGB1	golgin B1, golgi integral membrane protein	2804	-1.00734	1.25381	1.23405	1.55791	1.57427	1.34695	1.88437	8.36792	30.9787	1.3886e-10	4.81967e-10
201057_s_at	GOLGB1	golgin B1, golgi integral membrane protein	2804	1.07856	1.53516	1.63701	1.69776	1.48477	1.28634	1.37599	8.72064	26.7272	6.60121e-10	2.02743e-09
201058_s_at	MYL9	myosin, light chain 9, regulatory	10398	-3.20993	-5.1209	-5.21434	-4.61507	-5.34665	-3.84061	-4.86762	7.13314	185.646	1.88459e-19	5.53447e-18
201059_at	CTTN	cortactin	2017	1.15051	-1.27299	-1.23723	-1.11898	-1.18009	-1.21441	-1.39747	9.78979	21.3607	6.61709e-09	1.72104e-08
201060_x_at	STOM	stomatin	2040	3.13214	4.96472	4.46631	1.79492	1.32602	1.54968	1.10683	8.71397	181.805	2.41387e-19	6.93178e-18
201061_s_at	STOM	stomatin	2040	3.95894	5.14947	4.7205	2.04243	1.317	1.61469	1.07599	8.76176	262.779	3.03413e-21	1.58306e-19
201063_at	RCN1	reticulocalbin 1, EF-hand calcium binding domain	5954	-1.15579	-1.04816	1.08012	1.28459	1.19496	1.17184	-1.01247	10.8737	13.2766	6.49351e-07	1.26642e-06
201064_s_at	PABPC4	poly(A) binding protein, cytoplasmic 4 (inducible form)	8761	1.50177	-1.13102	1.01257	-1.0459	-1.00557	-1.01862	-1.21604	9.54204	32.128	9.40908e-11	3.37091e-10
201065_s_at	GTF2I /// GTF2IP1 /// LOC100093631	general transcription factor II, i /// general transcription factor II, i, pseudogene 1 /// general transcription factor II, i, pseudogene	100093631 /// 2969 /// 2970	2.1831	1.74488	2.09246	2.14149	2.80135	2.18219	2.43929	10.733	62.7135	5.76358e-14	4.00685e-13
201066_at	CYC1	cytochrome c-1	1537	1.03854	-1.39374	-1.40901	-1.30388	-1.29619	-1.35384	-1.42729	9.88152	20.0042	1.279e-08	3.17832e-08
201067_at	PSMC2	proteasome (prosome, macropain) 26S subunit, ATPase, 2	5701	-1.10973	-1.30621	-1.27724	-1.02819	-1.02055	-1.10154	1.17341	8.04833	14.9266	2.19175e-07	4.54602e-07
201068_s_at	PSMC2	proteasome (prosome, macropain) 26S subunit, ATPase, 2	5701	-1.08406	-1.20743	-1.10957	-1.23991	-1.32949	-1.5254	-1.3638	11.0534	18.3054	3.08034e-08	7.2234e-08
201069_at	MMP2	matrix metallopeptidase 2 (gelatinase A, 72kDa gelatinase, 72kDa type IV collagenase)	4313	-1.26683	-1.2659	-1.11878	1.29879	1.11513	1.16291	-1.60704	8.82932	64.8707	3.92437e-14	2.83147e-13
201072_s_at	SMARCC1	SWI/SNF related, matrix associated, actin dependent regulator of chromatin, subfamily c, member 1	6599	1.40812	-1.04882	1.14257	1.02647	1.17147	-1.06397	-1.20783	10.3333	15.2901	1.74692e-07	3.67542e-07
201073_s_at	SMARCC1	SWI/SNF related, matrix associated, actin dependent regulator of chromatin, subfamily c, member 1	6599	1.4743	1.187	1.26734	1.153	1.15205	-1.03424	-1.09573	8.07202	12.2744	1.32056e-06	2.47925e-06
201074_at	SMARCC1	SWI/SNF related, matrix associated, actin dependent regulator of chromatin, subfamily c, member 1	6599	1.64923	1.04818	-1.04066	1.0191	1.10737	-1.01314	-1.26974	10.1901	55.855	2.13595e-13	1.31032e-12
201075_s_at	SMARCC1	SWI/SNF related, matrix associated, actin dependent regulator of chromatin, subfamily c, member 1	6599	1.55121	-1.02622	-1.00576	-1.07602	-1.00723	-1.19804	-1.54388	8.88267	57.3138	1.59709e-13	1.00617e-12
201076_at	NHP2L1	NHP2 non-histone chromosome protein 2-like 1 (S. cerevisiae)	4809	1.07114	-1.14908	-1.23161	-1.19571	-1.1735	-1.23088	-1.068	9.25089	9.4717	1.23232e-05	2.06216e-05
201077_s_at	NHP2L1	NHP2 non-histone chromosome protein 2-like 1 (S. cerevisiae)	4809	-1.3371	-1.46248	-1.50182	-1.6363	-1.78345	-1.71119	-1.68004	11.3829	42.1859	4.87739e-12	2.22786e-11
201078_at	TM9SF2	transmembrane 9 superfamily member 2	9375	-1.22505	-1.37835	-1.29529	-1.21737	-1.3919	-1.51603	-1.53975	10.0893	15.2221	1.82209e-07	3.8187e-07
201079_at	SYNGR2	synaptogyrin 2	9144	-1.1608	-1.45808	-1.55857	-1.55753	-1.89399	-1.49301	-1.54383	7.66471	25.1595	1.23866e-09	3.64292e-09
201080_at	PIP4K2B	phosphatidylinositol-5-phosphate 4-kinase, type II, beta	8396	1.15837	-1.03631	1.10152	1.18573	1.45544	1.35308	1.45367	8.43642	12.1096	1.49e-06	2.78265e-06
201083_s_at	BCLAF1	BCL2-associated transcription factor 1	9774	1.51628	1.61738	1.41894	1.25027	1.5196	-1.01976	1.13282	9.76418	6.57498	0.000207335	0.000305182
201084_s_at	BCLAF1	BCL2-associated transcription factor 1	9774	1.31509	1.28368	1.25221	1.25096	1.41328	1.05482	1.34665	11.7267	9.88586	8.62827e-06	1.47081e-05
201085_s_at	SON	SON DNA binding protein	6651	1.7033	1.6492	1.76787	1.94577	2.07024	1.50723	1.46486	9.65895	17.002	6.32914e-08	1.41924e-07
201086_x_at	SON	SON DNA binding protein	6651	1.70369	1.49889	1.57317	1.70838	1.97825	1.47182	1.47588	10.4945	52.3393	4.43555e-13	2.53344e-12
201087_at	PXN	paxillin	5829	-1.07197	-1.37572	-1.28504	-1.24245	-1.48187	-1.38295	-1.75659	7.45514	27.3998	5.08799e-10	1.59459e-09
201089_at	ATP6V1B2	ATPase, H+ transporting, lysosomal 56/58kDa, V1 subunit B2	526	-1.08976	-1.25001	-1.22419	-1.12429	-1.03888	-1.1305	1.14482	8.58738	15.5163	1.52014e-07	3.22575e-07
201090_x_at	TUBA1B	tubulin, alpha 1b	10376	1.14359	1.18385	1.20693	1.23939	1.38077	1.26613	1.46782	13.7595	18.308	3.07616e-08	7.21553e-08
201092_at	RBBP7	retinoblastoma binding protein 7	5931	1.09574	-1.07288	-1.09006	-1.05494	1.0303	-1.15328	-1.12876	11.0956	7.77129	5.98281e-05	9.31773e-05
201093_x_at	SDHA	succinate dehydrogenase complex, subunit A, flavoprotein (Fp)	6389	1.16302	-1.09968	-1.05307	1.14216	1.26555	1.18427	1.21459	9.11927	15.5032	1.53231e-07	3.24972e-07
201094_at	RPS29	ribosomal protein S29	6235	-1.1267	-1.00647	-1.08817	-1.12525	-1.23098	-1.12464	-1.15275	13.8817	7.74604	6.13437e-05	9.54574e-05
201095_at	DAP	death-associated protein	1611	-1.06943	-1.20357	1.03359	1.32179	1.22243	1.45195	1.31539	8.68564	29.2049	2.59756e-10	8.55547e-10
201096_s_at	ARF4	ADP-ribosylation factor 4	378	-1.27783	-1.35438	-1.21171	1.01645	-1.21062	-1.31377	-1.13351	10.3367	8.72043	2.41719e-05	3.92437e-05
201097_s_at	ARF4	ADP-ribosylation factor 4	378	-1.27701	-1.35145	-1.26792	-1.0234	-1.08736	-1.16834	1.02616	11.539	16.5197	8.35439e-08	1.83965e-07
201098_at	COPB2	coatomer protein complex, subunit beta 2 (beta prime)	9276	-1.39117	-1.45355	-1.2342	-1.1701	-1.39879	-1.3886	-1.45898	10.5399	12.7659	9.27564e-07	1.77262e-06
201099_at	USP9X	ubiquitin specific peptidase 9, X-linked	8239	1.71755	-1.19153	-1.63902	-1.66441	-1.47716	-1.96194	-1.76893	9.40243	101.892	2.16784e-16	2.71698e-15
201100_s_at	USP9X	ubiquitin specific peptidase 9, X-linked	8239	1.62915	-1.19721	-1.51993	-1.63838	-1.46397	-1.94747	-1.86979	10.7431	150.529	2.24389e-18	4.91853e-17
201101_s_at	BCLAF1	BCL2-associated transcription factor 1	9774	1.42382	1.39985	1.60047	1.40182	1.52074	1.04203	1.16918	10.2249	13.8208	4.48992e-07	8.93676e-07
201103_x_at	NBPF10 /// NBPF12 /// NBPF15 /// NBPF16 /// NBPF8 /// NBPF9 /// RP11-94I2.2	neuroblastoma breakpoint family, member 10 /// neuroblastoma breakpoint family, member 12 /// neuroblastoma breakpoint family, member 15 /// neuroblastoma breakpoint family, member 16 /// neuroblastoma breakpoint family, member 8 /// neuroblastoma breakpoint family, member 9 /// neuroblastoma breakpoint family, member 11-like	100132406 /// 200030 /// 284565 /// 440670 /// 440675 /// 728841 /// 728936	1.48953	2.23583	2.83368	3.70352	4.01693	3.2086	2.8882	10.9462	207.139	5.142e-20	1.80674e-18
201104_x_at	NBPF10 /// NBPF11 /// NBPF12 /// NBPF14 /// NBPF15 /// NBPF16 /// NBPF8 /// RP11-94I2.2	neuroblastoma breakpoint family, member 10 /// neuroblastoma breakpoint family, member 11 /// neuroblastoma breakpoint family, member 12 /// neuroblastoma breakpoint family, member 14 /// neuroblastoma breakpoint family, member 15 /// neuroblastoma breakpoint family, member 16 /// neuroblastoma breakpoint family, member 8 /// neuroblastoma breakpoint family, member 11-like	100132406 /// 200030 /// 25832 /// 284565 /// 440675 /// 728841 /// 728912 /// 728936	1.30097	1.7297	2.1908	2.68682	3.17357	2.46823	2.1932	9.80548	155.166	1.56926e-18	3.57893e-17
201105_at	LGALS1	lectin, galactoside-binding, soluble, 1	3956	-6.06261	-6.12736	-8.78329	-6.90711	-6.03042	-2.60052	-2.65095	8.7707	308.681	4.44312e-22	2.96945e-20
201106_at	GPX4	glutathione peroxidase 4 (phospholipid hydroperoxidase)	2879	-1.13666	-1.36112	-1.33338	-1.08478	-1.18886	1.02742	-1.1734	11.0656	8.87541	2.09725e-05	3.4277e-05
201110_s_at	THBS1	thrombospondin 1	7057	1.41637	-2.62989	-3.08471	-1.71296	-1.08126	-1.75967	-2.22139	6.97874	50.4197	6.73994e-13	3.69422e-12
201111_at	CSE1L	CSE1 chromosome segregation 1-like (yeast)	1434	1.15474	1.17892	1.13005	-1.02655	1.05781	-1.40216	1.00251	11.2593	29.3969	2.42347e-10	8.04235e-10
201112_s_at	CSE1L	CSE1 chromosome segregation 1-like (yeast)	1434	1.06783	-1.03369	1.02379	-1.37471	-1.38941	-1.85528	-1.78999	11.5115	108.502	1.04249e-16	1.43334e-15
201113_at	TUFM	Tu translation elongation factor, mitochondrial	7284	1.04522	-1.39165	-1.40523	-1.16435	-1.1664	-1.21647	-1.30197	9.71218	15.5872	1.45569e-07	3.0971e-07
201114_x_at	PSMA7	proteasome (prosome, macropain) subunit, alpha type, 7	5688	-1.27617	-1.32852	-1.22819	-1.3368	-1.42792	-1.56071	-1.40777	11.6048	16.2347	9.87361e-08	2.14774e-07
201116_s_at	CPE	carboxypeptidase E	1363	-1.41258	-1.41786	1.08566	-1.0457	1.13619	-1.00578	1.33529	9.25387	47.8502	1.20819e-12	6.24468e-12
201117_s_at	CPE	carboxypeptidase E	1363	-1.46703	-1.45481	-1.18149	-1.20783	1.05251	-1.01473	1.38359	9.35488	15.4423	1.59062e-07	3.36622e-07
201119_s_at	COX8A	cytochrome c oxidase subunit 8A (ubiquitous)	1351	-1.38458	-1.48216	-1.38743	-1.45135	-1.49016	-1.43046	-1.31284	11.6384	16.9864	6.38556e-08	1.43078e-07
201121_s_at	PGRMC1	progesterone receptor membrane component 1	10857	1.05988	-1.12833	-1.09763	-1.04871	1.02188	-1.06865	1.07724	11.7747	6.05314	0.000371077	0.000533304
201122_x_at	EIF5A	eukaryotic translation initiation factor 5A	1984	1.18636	-1.26472	-1.25785	-1.30753	-1.35973	-1.51793	-1.85952	10.0039	27.8191	4.33783e-10	1.37427e-09
201123_s_at	EIF5A	eukaryotic translation initiation factor 5A	1984	1.26643	-1.26878	-1.33276	-1.34413	-1.50373	-1.74052	-2.44303	10.3429	44.7788	2.52395e-12	1.22311e-11
201124_at	ITGB5	integrin, beta 5	3693	-1.21323	-1.2903	-1.16185	-1.05989	-1.24628	-1.07841	-1.61159	7.13724	18.0383	3.55804e-08	8.27031e-08
201125_s_at	ITGB5	integrin, beta 5	3693	-1.02704	-1.23642	-1.00415	-1.06644	-1.22796	-1.25502	-2.03249	9.71056	56.391	1.91799e-13	1.18785e-12
201126_s_at	MGAT1	mannosyl (alpha-1,3-)-glycoprotein beta-1,2-N-acetylglucosaminyltransferase	4245	-1.09876	-1.25762	-1.17951	-1.07777	-1.23578	-1.07449	-1.19202	7.8655	6.26073	0.000293458	0.000426025
201127_s_at	ACLY	ATP citrate lyase	47	1.34917	-1.16884	-1.07087	-1.03065	-1.06784	-1.11003	-1.28754	8.27498	13.8954	4.27229e-07	8.53044e-07
201128_s_at	ACLY	ATP citrate lyase	47	1.50064	-1.00889	-1.04655	1.11191	1.13869	1.06719	-1.05936	10.9028	17.8032	4.04503e-08	9.33199e-08
201129_at	SFRS7	splicing factor, arginine/serine-rich 7, 35kDa	6432	1.05961	1.47427	1.43456	1.23777	1.29115	-1.08049	1.32302	10.5192	25.232	1.20229e-09	3.54199e-09
201131_s_at	CDH1	cadherin 1, type 1, E-cadherin (epithelial)	999	3.12085	2.10902	2.04409	-1.0618	-1.2921	-1.09983	-1.18443	9.67133	190.752	1.36659e-19	4.1411e-18
201133_s_at	PJA2	praja ring finger 2	9867	-1.56385	-1.19402	-1.27735	1.04624	1.11543	1.13852	1.4715	9.51856	23.8277	2.17192e-09	6.12575e-09
201134_x_at	COX7C	cytochrome c oxidase subunit VIIc	1350	-1.32809	-1.35456	-1.39907	-1.62046	-1.64022	-1.59925	-1.3561	13.1831	37.1036	1.98859e-11	8.05722e-11
201135_at	ECHS1	enoyl Coenzyme A hydratase, short chain, 1, mitochondrial	1892	1.06736	-1.23483	-1.15015	1.01967	-1.00218	1.04203	-1.00162	10.1356	8.46692	3.05983e-05	4.91175e-05
201136_at	PLP2	proteolipid protein 2 (colonic epithelium-enriched)	5355	-1.11688	-1.40704	-1.51126	-1.33129	-1.40929	1.0352	1.1867	7.31181	36.8473	2.14428e-11	8.63271e-11
201137_s_at	HLA-DPB1	major histocompatibility complex, class II, DP beta 1	3115	-1.19672	-1.70389	-2.02834	-1.60651	-1.88385	-1.68539	-2.22764	7.897	33.4908	6.02426e-11	2.23708e-10
201138_s_at	SSB	Sjogren syndrome antigen B (autoantigen La)	6741	1.25675	1.06215	1.00884	-1.16695	-1.20489	-1.44744	-1.45646	11.1971	25.3031	1.16767e-09	3.44588e-09
201139_s_at	SSB	Sjogren syndrome antigen B (autoantigen La)	6741	1.28903	1.07938	-1.09747	-1.18269	-1.21223	-1.48239	-1.55786	10.7553	17.0724	6.0812e-08	1.3679e-07
201140_s_at	RAB5C	RAB5C, member RAS oncogene family	5878	-1.30631	-1.58841	-1.39833	-1.3383	-1.44125	-1.45902	-1.48573	6.9798	11.2898	2.76663e-06	4.99348e-06
201142_at	EIF2S1	eukaryotic translation initiation factor 2, subunit 1 alpha, 35kDa	1965	-1.19588	-1.22242	-1.12357	1.14074	1.23613	1.02456	1.28102	8.75031	20.3886	1.05725e-08	2.66171e-08
201143_s_at	EIF2S1	eukaryotic translation initiation factor 2, subunit 1 alpha, 35kDa	1965	-1.25369	-1.16279	-1.08634	1.25784	1.30584	-1.0129	1.33892	8.63737	23.8575	2.14411e-09	6.05258e-09
201144_s_at	EIF2S1	eukaryotic translation initiation factor 2, subunit 1 alpha, 35kDa	1965	-1.19169	-1.31653	-1.2895	-1.58314	-1.7078	-2.01533	-1.96044	10.4739	35.322	3.39175e-11	1.31743e-10
201145_at	HAX1	HCLS1 associated protein X-1	10456	-1.4934	-1.47368	-1.26049	-1.35557	-1.49502	-1.44879	-1.34923	9.80564	13.1232	7.21958e-07	1.40107e-06
201146_at	NFE2L2	nuclear factor (erythroid-derived 2)-like 2	4780	-1.18789	-1.19723	1.02637	-1.0314	-1.13582	-1.44984	-1.46575	9.04245	11.6007	2.17984e-06	3.98292e-06
201149_s_at	TIMP3	TIMP metallopeptidase inhibitor 3	7078	-1.27271	-1.32275	-1.21699	-1.00084	-1.22681	1.035	-1.18635	6.63826	6.18287	0.000320303	0.000463362
201152_s_at	MBNL1	muscleblind-like (Drosophila)	4154	-1.37438	-1.38383	-1.25208	1.20421	1.42304	1.0388	1.43867	8.14621	41.3206	6.12678e-12	2.73967e-11
201153_s_at	MBNL1	muscleblind-like (Drosophila)	4154	-1.51295	-1.4899	-1.507	1.14382	1.42948	1.10352	1.37101	7.93112	75.9673	6.4563e-15	5.56022e-14
201155_s_at	MFN2	mitofusin 2	9927	1.25371	-1.02649	1.03364	1.21317	1.22596	1.16777	1.16198	8.1729	10.1728	6.77989e-06	1.17074e-05
201156_s_at	RAB5C	RAB5C, member RAS oncogene family	5878	-1.25123	-1.47371	-1.33584	-1.30789	-1.35412	-1.30491	-1.37337	7.1535	9.83067	9.04272e-06	1.53772e-05
201157_s_at	NMT1	N-myristoyltransferase 1	4836	-1.21956	-1.71617	-1.72335	-1.60887	-2.03546	-1.97918	-2.62897	8.01734	36.2377	2.57023e-11	1.01987e-10
201158_at	NMT1	N-myristoyltransferase 1	4836	1.7884	1.22903	1.28862	1.53755	1.46232	1.25868	1.1378	6.97817	17.5333	4.69508e-08	1.07371e-07
201160_s_at	CSDA	cold shock domain protein A	8531	-1.17245	-1.65216	-1.84941	-2.02248	-2.29795	-2.09953	-4.02339	11.1606	116.276	4.64746e-17	7.08069e-16
201161_s_at	CSDA	cold shock domain protein A	8531	-1.13738	-1.70841	-1.47922	-1.89486	-2.14343	-2.16582	-3.57549	9.63708	88.2655	1.14599e-15	1.20165e-14
201162_at	IGFBP7	insulin-like growth factor binding protein 7	3490	-7.8303	-5.01321	-3.87285	-4.69111	-4.81378	-4.61245	-4.2528	8.61589	253.402	4.67825e-21	2.29757e-19
201163_s_at	IGFBP7	insulin-like growth factor binding protein 7	3490	-49.532	-6.76922	-6.01714	-7.1077	-6.36251	-6.47143	-5.75182	8.34619	270.956	2.10561e-21	1.14948e-19
201164_s_at	PUM1	pumilio homolog 1 (Drosophila)	9698	1.40789	1.34868	1.46563	1.56241	1.71296	1.48882	1.55005	9.56937	28.7612	3.0539e-10	9.94107e-10
201165_s_at	PUM1	pumilio homolog 1 (Drosophila)	9698	1.5485	1.49663	1.6571	1.73296	1.9651	1.50345	1.59669	10.8646	22.4361	4.02065e-09	1.08445e-08
201166_s_at	PUM1	pumilio homolog 1 (Drosophila)	9698	1.54208	1.46403	1.4543	1.5974	1.79027	1.62513	1.67112	11.479	37.457	1.79363e-11	7.33492e-11
201170_s_at	BHLHE40	basic helix-loop-helix family, member e40	8553	-1.56966	-2.19049	-2.14422	-2.31302	-1.90872	2.19864	-1.82508	6.42113	175.807	3.59008e-19	9.80973e-18
201172_x_at	ATP6V0E1	ATPase, H+ transporting, lysosomal 9kDa, V0 subunit e1	8992	-1.60388	-1.62877	-1.53901	-1.76631	-2.3155	-1.96012	-1.89931	10.454	65.6749	3.41092e-14	2.4887e-13
201173_x_at	NUDC	nuclear distribution gene C homolog (A. nidulans)	10726	1.38916	1.03415	1.05666	1.04174	1.08211	-1.06123	-1.17282	9.70701	17.181	5.71852e-08	1.29181e-07
201174_s_at	TERF2IP	telomeric repeat binding factor 2, interacting protein	54386	1.11046	1.08044	1.49216	2.83548	3.63101	4.10073	5.95122	9.03661	328.479	2.11367e-22	1.56109e-20
201175_at	TMX2	thioredoxin-related transmembrane protein 2	51075	-1.20255	-1.32894	-1.36416	-1.48098	-1.56397	-1.71334	-1.54776	9.72335	26.5429	7.09629e-10	2.16665e-09
201176_s_at	ARCN1	archain 1	372	1.03364	-1.15887	-1.03207	1.18877	1.15546	1.0618	-1.02725	9.60771	6.07305	0.000362753	0.00052186
201178_at	FBXO7	F-box protein 7	25793	-1.36027	-1.3538	-1.20446	-1.11887	-1.16258	-1.22232	-1.32261	9.08588	13.2727	6.51111e-07	1.26957e-06
201179_s_at	GNAI3	guanine nucleotide binding protein (G protein), alpha inhibiting activity polypeptide 3	2773	-1.27997	-1.40913	-1.31562	-1.37692	-1.54629	-1.87095	-1.84251	8.77482	31.0966	1.33347e-10	4.64699e-10
201182_s_at	CHD4	chromodomain helicase DNA binding protein 4	1108	1.86666	1.42466	1.60607	1.73486	1.92984	1.50982	1.50323	9.28326	22.0697	4.75361e-09	1.26673e-08
201183_s_at	CHD4	chromodomain helicase DNA binding protein 4	1108	1.64585	1.25857	1.40914	1.60415	1.80139	1.51685	1.38794	9.60412	23.9148	2.09188e-09	5.91738e-09
201184_s_at	CHD4	chromodomain helicase DNA binding protein 4	1108	1.53164	1.16684	1.28168	1.48977	1.63723	1.45456	1.4635	9.80446	24.5837	1.57408e-09	4.54691e-09
201185_at	HTRA1	HtrA serine peptidase 1	5654	1.12669	-1.22458	1.01361	1.27946	1.09396	1.30104	1.08936	7.93693	21.3414	6.6778e-09	1.73509e-08
201186_at	LRPAP1	low density lipoprotein receptor-related protein associated protein 1	4043	-1.05091	-1.28285	-1.1812	1.04201	-1.01887	1.01769	1.02604	8.15359	7.80448	5.78965e-05	9.02883e-05
201188_s_at	ITPR3	inositol 1,4,5-triphosphate receptor, type 3	3710	-1.15948	-1.28155	-1.47309	-1.561	-1.67439	-1.45729	-1.37471	6.23463	10.7203	4.33412e-06	7.63868e-06
201189_s_at	ITPR3	inositol 1,4,5-triphosphate receptor, type 3	3710	-1.14015	-1.58689	-1.98152	-2.1603	-2.36526	-2.04162	-2.29684	6.51586	60.2749	9.03651e-14	6.02225e-13
201190_s_at	PITPNA	phosphatidylinositol transfer protein, alpha	5306	1.31075	1.08631	1.10688	1.26446	1.22042	1.33453	1.36624	8.87915	10.6499	4.58681e-06	8.05449e-06
201192_s_at	PITPNA	phosphatidylinositol transfer protein, alpha	5306	-1.05502	-1.47598	-1.52552	-1.72585	-1.77365	-1.76669	-1.93081	7.71052	33.9298	5.23616e-11	1.96496e-10
201193_at	IDH1	isocitrate dehydrogenase 1 (NADP+), soluble	3417	-1.32024	-1.57514	-1.46579	-1.2875	-1.43797	-1.32523	-1.28719	12.0444	16.6332	7.82162e-08	1.72953e-07
201194_at	SEPW1	selenoprotein W, 1	6415	-1.36789	-1.29545	-1.32473	-1.60075	-1.86425	-1.78446	-1.79014	10.4738	31.0081	1.3746e-10	4.7749e-10
201195_s_at	SLC7A5	solute carrier family 7 (cationic amino acid transporter, y+ system), member 5	8140	-1.38188	-1.52812	-1.08372	-1.52586	-1.65951	-1.77367	-4.64878	9.43532	146.931	2.98379e-18	6.29557e-17
201196_s_at	AMD1	adenosylmethionine decarboxylase 1	262	-1.29121	-1.66264	-1.77282	-2.09424	-2.36792	-3.60653	-2.9565	8.61271	74.8353	7.67006e-15	6.49706e-14
201197_at	AMD1	adenosylmethionine decarboxylase 1	262	-1.02295	-1.28419	-1.50355	-1.81568	-1.91818	-2.63378	-2.17173	10.2548	93.1214	6.16493e-16	6.86696e-15
201198_s_at	PSMD1	proteasome (prosome, macropain) 26S subunit, non-ATPase, 1	5707	-1.07151	-1.34357	-1.21307	-1.42624	-1.47234	-1.73855	-1.68581	10.186	32.7954	7.54793e-11	2.7532e-10
201199_s_at	PSMD1	proteasome (prosome, macropain) 26S subunit, non-ATPase, 1	5707	-1.02735	-1.2717	-1.08124	-1.08674	-1.32954	-1.2703	-1.04826	10.8451	10.6372	4.6338e-06	8.13479e-06
201200_at	CREG1	cellular repressor of E1A-stimulated genes 1	8804	-1.54759	-1.28887	-1.12255	-1.10695	-1.43666	-1.29636	-1.16872	9.18306	17.4954	4.79496e-08	1.09568e-07
201201_at	CSTB	cystatin B (stefin B)	1476	-1.16711	-1.40824	-1.2584	-1.25058	-1.40157	-1.37494	-1.29234	11.0698	13.3161	6.31952e-07	1.23416e-06
201202_at	PCNA	proliferating cell nuclear antigen	5111	-1.12796	-1.12473	-1.29895	-1.36008	-1.24161	-1.71228	-1.46917	11.9485	22.851	3.3352e-09	9.11233e-09
201204_s_at	RRBP1	ribosome binding protein 1 homolog 180kDa (dog)	6238	1.86973	1.26302	1.50996	1.95555	1.38095	1.70926	1.24612	7.96766	28.67	3.15803e-10	1.0253e-09
201206_s_at	RRBP1	ribosome binding protein 1 homolog 180kDa (dog)	6238	1.39681	1.12327	1.36953	1.5644	1.19384	1.15565	-1.05828	7.2586	15.745	1.32276e-07	2.83124e-07
201207_at	TNFAIP1	tumor necrosis factor, alpha-induced protein 1 (endothelial)	7126	-1.04059	-1.05021	1.00213	1.27615	1.45779	1.32813	1.41598	7.82887	28.8511	2.95486e-10	9.6332e-10
201209_at	HDAC1	histone deacetylase 1	3065	-1.01642	-1.23952	-1.38113	-1.25301	-1.31402	-1.41786	-1.72348	9.70519	16.2929	9.54046e-08	2.08209e-07
201210_at	DDX3X	DEAD (Asp-Glu-Ala-Asp) box polypeptide 3, X-linked	1654	1.1179	-1.10963	-1.07945	1.00957	1.03748	-1.21537	-1.14529	11.6099	7.90316	5.25411e-05	8.2298e-05
201211_s_at	DDX3X	DEAD (Asp-Glu-Ala-Asp) box polypeptide 3, X-linked	1654	-1.35236	-1.4962	-1.19353	-1.56797	-1.64901	-2.04692	-2.36116	7.44967	22.9086	3.25053e-09	8.90257e-09
201212_at	LGMN	legumain	5641	-1.02591	-1.29071	-1.31013	-1.11516	-1.3428	-1.15194	-1.4035	8.3012	10.3533	5.83964e-06	1.01486e-05
201214_s_at	PPP1R7	protein phosphatase 1, regulatory (inhibitor) subunit 7	5510	-1.28857	-1.2516	-1.20617	1.01461	-1.06244	-1.21302	1.0249	8.72322	10.0797	7.32787e-06	1.26049e-05
201215_at	PLS3	plastin 3 (T isoform)	5358	-1.08607	-1.44228	-1.6883	-1.70529	-1.9733	-1.9588	-2.33514	12.4387	106.279	1.32706e-16	1.76563e-15
201216_at	ERP29	endoplasmic reticulum protein 29	10961	1.49508	1.30272	1.16144	1.12841	-1.09399	-1.07689	-1.08712	9.55002	17.2229	5.58512e-08	1.26333e-07
201218_at	CTBP2	C-terminal binding protein 2	1488	1.37449	1.01738	-1.0861	-1.01036	1.04717	-1.203	-1.05746	11.7282	19.1966	1.92716e-08	4.66254e-08
201219_at	CTBP2	C-terminal binding protein 2	1488	1.39844	-1.17507	-1.20634	-1.0897	-1.15766	-1.37004	-1.75941	8.20759	49.6221	8.05454e-13	4.32875e-12
201220_x_at	CTBP2	C-terminal binding protein 2	1488	1.33662	-1.03463	1.00068	1.00042	1.04264	-1.14617	-1.03718	11.4455	11.3862	2.56819e-06	4.64957e-06
201221_s_at	SNRNP70	small nuclear ribonucleoprotein 70kDa (U1)	6625	1.4662	1.15308	1.24736	1.34262	1.40942	1.16028	1.11032	8.83281	12.4375	1.17312e-06	2.21737e-06
201222_s_at	RAD23B	RAD23 homolog B (S. cerevisiae)	5887	1.2638	-1.02624	-1.0082	1.18532	-1.00754	-1.18847	-1.27518	10.9554	17.9586	3.71559e-08	8.61104e-08
201223_s_at	RAD23B	RAD23 homolog B (S. cerevisiae)	5887	1.07234	-1.15703	-1.12419	1.01157	-1.05564	-1.21705	-1.31025	10.4611	9.01588	1.84655e-05	3.03613e-05
201224_s_at	SRRM1	serine/arginine repetitive matrix 1	10250	1.52995	1.18754	1.2171	1.17767	1.27253	1.08934	-1.04984	8.27	19.0503	2.07886e-08	5.00296e-08
201225_s_at	SRRM1	serine/arginine repetitive matrix 1	10250	1.90112	1.36705	1.31849	1.34592	1.54565	1.27219	1.00255	10.4449	34.2433	4.74191e-11	1.79219e-10
201229_s_at	ARIH2	ariadne homolog 2 (Drosophila)	10425	1.33016	-1.12655	-1.13943	-1.06607	-1.14679	-1.48291	-1.4681	7.37337	22.0795	4.73234e-09	1.26133e-08
201230_s_at	ARIH2	ariadne homolog 2 (Drosophila)	10425	-1.13798	-1.38673	-1.4724	-1.25351	-1.18635	-1.47552	-1.32242	8.31727	14.0809	3.77856e-07	7.59433e-07
201231_s_at	ENO1	enolase 1, (alpha)	2023	1.1603	-1.06967	-1.08218	-1.36628	-1.41892	-1.11607	-1.6446	12.0344	48.0646	1.14952e-12	5.97788e-12
201232_s_at	PSMD13	proteasome (prosome, macropain) 26S subunit, non-ATPase, 13	5719	-1.16001	-1.27376	-1.34444	-1.25786	-1.41284	-1.37096	-1.4445	9.46022	9.2906	1.44486e-05	2.40386e-05
201236_s_at	BTG2	BTG family, member 2	7832	-1.53871	-1.21943	-1.01069	1.09057	-1.10879	-1.02353	-1.03264	7.81132	15.358	1.67521e-07	3.53343e-07
201237_at	CAPZA2	capping protein (actin filament) muscle Z-line, alpha 2	830	-1.21578	-1.32702	-1.37461	-1.30192	-1.32971	-1.32979	-1.05018	9.90793	7.81803	5.71276e-05	8.91643e-05
201240_s_at	LOC653566 /// SPCS2	signal peptidase complex subunit 2 homolog pseudogene /// signal peptidase complex subunit 2 homolog (S. cerevisiae)	653566 /// 9789	-1.05087	-1.00666	1.04166	1.09758	1.145	1.01847	1.28087	11.4474	10.6622	4.5413e-06	7.9816e-06
201242_s_at	ATP1B1	ATPase, Na+/K+ transporting, beta 1 polypeptide	481	-1.98488	-1.85145	-1.59571	1.18266	-1.22573	1.04704	1.29112	9.73648	38.9824	1.16036e-11	4.92058e-11
201243_s_at	ATP1B1	ATPase, Na+/K+ transporting, beta 1 polypeptide	481	-1.79224	-1.56369	-1.26583	1.40607	-1.02458	1.3052	1.57226	10.556	139.144	5.66246e-18	1.10363e-16
201244_s_at	RAF1	v-raf-1 murine leukemia viral oncogene homolog 1	5894	1.2343	-1.00482	1.0547	1.259	1.3866	1.15712	1.18604	8.94056	8.08924	4.38413e-05	6.92525e-05
201247_at	SREBF2	sterol regulatory element binding transcription factor 2	6721	-1.01714	-1.17915	-1.16157	-1.17177	-1.05704	-1.11455	1.09365	7.71954	6.40901	0.0002488	0.000363575
201250_s_at	SLC2A1	solute carrier family 2 (facilitated glucose transporter), member 1	6513	-1.50741	-1.93159	-1.47226	-1.0571	-1.37719	1.71976	1.20982	9.44997	117.952	3.93119e-17	6.09687e-16
201251_at	PKM2	pyruvate kinase, muscle	5315	-1.23495	-1.69104	-1.62395	-1.53911	-1.72986	-1.40987	-1.70708	6.75683	18.7658	2.41217e-08	5.74645e-08
201252_at	PSMC4	proteasome (prosome, macropain) 26S subunit, ATPase, 4	5704	1.07828	-1.11868	-1.12429	-1.1743	-1.31177	-1.4663	-1.44233	9.01309	9.98344	7.94491e-06	1.36085e-05
201253_s_at	CDIPT	CDP-diacylglycerol--inositol 3-phosphatidyltransferase (phosphatidylinositol synthase)	10423	1.00827	-1.36138	-1.18738	1.04725	-1.12767	-1.00215	-1.02171	10.3714	9.32643	1.39986e-05	2.33109e-05
201254_x_at	RPS6	ribosomal protein S6	6194	-1.04458	1.03456	-1.01653	-1.0738	-1.13212	-1.13356	-1.16507	13.8267	6.74275	0.000172881	0.000256581
201255_x_at	BAT3	HLA-B associated transcript 3	7917	1.30531	-1.13932	-1.05829	1.11308	1.17479	1.17889	1.14205	8.81651	9.47285	1.23108e-05	2.06035e-05
201256_at	COX7A2L	cytochrome c oxidase subunit VIIa polypeptide 2 like	9167	-1.58221	-1.36803	-1.38532	-1.37559	-1.4649	-1.31739	-1.07567	11.1026	26.4418	7.38476e-10	2.25076e-09
201258_at	RPS16	ribosomal protein S16	6217	-1.20823	-1.09589	-1.14422	-1.12579	-1.28738	-1.20508	-1.20862	13.2875	9.32794	1.39799e-05	2.32813e-05
201259_s_at	SYPL1	synaptophysin-like 1	6856	-1.69004	-1.69796	-1.55472	-1.6725	-2.16282	-2.31232	-2.66648	8.80435	52.7181	4.09089e-13	2.35526e-12
201260_s_at	SYPL1	synaptophysin-like 1	6856	-1.29226	-1.28977	-1.29482	-1.39721	-1.56828	-1.56804	-2.10336	10.1705	26.5838	6.98286e-10	2.13378e-09
201263_at	TARS	threonyl-tRNA synthetase	6897	1.03072	-1.32	-1.39113	-1.69256	-1.76543	-2.23716	-2.41748	11.0269	73.6167	9.25863e-15	7.69012e-14
201266_at	TXNRD1	thioredoxin reductase 1	7296	-1.43661	-1.91128	-1.7082	-2.01373	-1.9484	-2.51797	-2.28139	10.0859	84.1258	1.9959e-15	1.96491e-14
201268_at	NME1 /// NME1-NME2 /// NME2	non-metastatic cells 1, protein (NM23A) expressed in /// NME1-NME2 readthrough transcript /// non-metastatic cells 2, protein (NM23B) expressed in	4830 /// 4831 /// 654364	-1.37961	-1.53863	-1.51404	-1.68626	-2.06549	-1.92482	-2.51669	11.6538	73.3844	9.60009e-15	7.95274e-14
201272_at	AKR1B1	aldo-keto reductase family 1, member B1 (aldose reductase)	231	-1.29055	-1.54893	-1.50085	-1.38812	-1.51298	-1.58318	-1.62677	10.8596	29.1822	2.61896e-10	8.62268e-10
201274_at	PSMA5	proteasome (prosome, macropain) subunit, alpha type, 5	5686	-1.32142	-1.60621	-1.5951	-1.96102	-2.14632	-2.31725	-2.30874	10.566	56.6039	1.83821e-13	1.14281e-12
201275_at	FDPS	farnesyl diphosphate synthase (farnesyl pyrophosphate synthetase, dimethylallyltranstransferase, geranyltranstransferase)	2224	-1.25597	-1.26512	-1.27537	-1.20433	-1.01932	-1.14716	-1.01938	10.487	6.79554	0.000163359	0.000243047
201276_at	RAB5B	RAB5B, member RAS oncogene family	5869	-1.06705	1.10532	1.09924	1.2234	1.2925	1.28611	1.33797	7.70039	9.00101	1.87148e-05	3.07478e-05
201277_s_at	HNRNPAB	heterogeneous nuclear ribonucleoprotein A/B	3182	1.60238	-1.00478	1.07199	1.04232	1.14728	-1.30936	-1.13059	11.895	50.5268	6.58185e-13	3.61214e-12
201278_at	DAB2	disabled homolog 2, mitogen-responsive phosphoprotein (Drosophila)	1601	-1.34993	-1.06587	1.45429	2.3932	1.5036	2.01101	1.8117	7.29062	66.8606	2.78193e-14	2.06937e-13
201279_s_at	DAB2	disabled homolog 2, mitogen-responsive phosphoprotein (Drosophila)	1601	-1.13382	1.07656	1.30805	1.71273	1.28179	1.65802	1.5758	7.36909	27.7341	4.47959e-10	1.41521e-09
201280_s_at	DAB2	disabled homolog 2, mitogen-responsive phosphoprotein (Drosophila)	1601	-1.41489	-1.08309	1.44609	2.63792	1.55089	1.95078	1.78729	6.9745	82.963	2.34345e-15	2.2599e-14
201281_at	ADRM1	adhesion regulating molecule 1	11047	1.19952	-1.33013	-1.21465	-1.32535	-1.37573	-1.50423	-1.55243	8.75285	30.8836	1.43482e-10	4.97078e-10
201284_s_at	APEH	N-acylaminoacyl-peptide hydrolase	327	1.11509	-1.40787	-1.4919	-1.53844	-1.8292	-1.718	-2.04862	8.49987	57.9925	1.39833e-13	8.91791e-13
201285_at	MKRN1	makorin ring finger protein 1	23608	1.11362	-1.21502	-1.26271	-1.13801	-1.08077	-1.1273	1.10012	9.32416	19.7923	1.42236e-08	3.51035e-08
201286_at	SDC1	syndecan 1	6382	-1.02222	-1.39724	-1.53742	-1.29902	-1.20593	-1.22883	-1.23064	7.29184	10.1245	7.05838e-06	1.21639e-05
201287_s_at	SDC1	syndecan 1	6382	-1.31678	-1.53003	-1.61442	-1.55588	-1.62144	-1.67709	-1.66401	7.71208	23.0817	3.00972e-09	8.28681e-09
201288_at	ARHGDIB	Rho GDP dissociation inhibitor (GDI) beta	397	-1.39436	-1.44817	-1.1884	1.52636	1.01095	1.28301	-1.06701	6.03585	18.117	3.40952e-08	7.94717e-08
201289_at	CYR61	cysteine-rich, angiogenic inducer, 61	3491	-1.3732	-3.64545	-3.47517	-2.10445	-2.09913	-2.26468	-3.21489	7.82202	124.921	2.00764e-17	3.34362e-16
201290_at	SEC11A	SEC11 homolog A (S. cerevisiae)	23478	-1.09483	-1.06954	-1.11051	-1.21028	-1.36563	-1.36893	-1.45148	11.9281	20.7946	8.67436e-09	2.21349e-08
201291_s_at	TOP2A	topoisomerase (DNA) II alpha 170kDa	7153	1.2328	1.36959	1.3951	1.27112	1.58441	1.20565	1.18536	11.3797	10.0782	7.33703e-06	1.2619e-05
201293_x_at	PPIA	peptidylprolyl isomerase A (cyclophilin A)	5478	-1.08901	-1.21356	-1.18688	-1.34129	-1.29269	-1.39011	-1.33691	13.4528	19.7492	1.45361e-08	3.58406e-08
201294_s_at	WSB1	WD repeat and SOCS box-containing 1	26118	1.30411	2.43693	2.35353	3.25201	3.2932	3.62077	2.994	8.52987	89.0367	1.03631e-15	1.09908e-14
201295_s_at	WSB1	WD repeat and SOCS box-containing 1	26118	2.35654	3.89656	4.13858	5.54496	7.47078	6.70263	4.63798	6.93072	50.8813	6.08669e-13	3.36964e-12
201296_s_at	WSB1	WD repeat and SOCS box-containing 1	26118	1.49507	1.7651	1.76296	2.27116	2.74384	2.94632	2.24078	11.0716	60.8781	8.07254e-14	5.42866e-13
201297_s_at	MOBKL1B	MOB1, Mps One Binder kinase activator-like 1B (yeast)	55233	-1.11778	-1.1484	-1.16601	-1.31663	-1.52043	-2.27361	-1.82344	7.65618	19.0405	2.08946e-08	5.02708e-08
201298_s_at	MOBKL1B	MOB1, Mps One Binder kinase activator-like 1B (yeast)	55233	-1.20221	-1.19072	-1.30454	-1.48164	-1.69015	-2.23332	-2.28014	9.08906	37.1945	1.93638e-11	7.8641e-11
201299_s_at	MOBKL1B	MOB1, Mps One Binder kinase activator-like 1B (yeast)	55233	-1.02344	-1.07389	-1.074	-1.04198	-1.2027	-1.6148	-1.81473	7.37256	11.249	2.85555e-06	5.14645e-06
201300_s_at	PRNP	prion protein	5621	-2.60147	-7.41223	-5.78039	-2.20974	-3.36071	-2.32315	-2.03156	9.11851	220.636	2.42967e-20	9.5316e-19
201301_s_at	ANXA4	annexin A4	307	-3.34181	-3.17517	-2.61296	-2.33702	-3.42756	-2.68841	-2.73631	7.82491	128.74	1.41049e-17	2.44881e-16
201302_at	ANXA4	annexin A4	307	-3.04624	-2.9646	-2.97247	-2.56642	-3.45612	-2.59762	-2.77968	7.37386	107.626	1.14579e-16	1.55591e-15
201303_at	EIF4A3	eukaryotic translation initiation factor 4A, isoform 3	9775	1.4247	1.05429	1.08692	1.04561	1.10898	-1.06819	-1.03549	10.2078	17.1391	5.85552e-08	1.32e-07
201305_x_at	ANP32B	acidic (leucine-rich) nuclear phosphoprotein 32 family, member B	10541	1.2277	1.35048	1.49777	1.98909	1.90218	1.83742	1.45139	11.0156	46.0948	1.83064e-12	9.12355e-12
201306_s_at	ANP32B	acidic (leucine-rich) nuclear phosphoprotein 32 family, member B	10541	1.216	1.38012	1.55778	2.00111	2.03331	1.91954	1.55005	11.3233	70.8449	1.43665e-14	1.1396e-13
201307_at	40797	septin 11	55752	-1.27732	-1.01889	1.07372	1.27528	1.47383	1.07009	-1.10836	10.2456	40.4387	7.76484e-12	3.40234e-11
201308_s_at	40797	septin 11	55752	-1.61394	-1.38509	-1.10917	-1.09751	1.03092	-1.65727	-1.6686	6.16242	15.1123	1.95088e-07	4.07215e-07
201309_x_at	C5orf13	chromosome 5 open reading frame 13	9315	-1.11076	1.06202	-1.01694	1.24808	1.56978	1.19068	1.7184	9.21871	10.1064	7.16612e-06	1.23406e-05
201310_s_at	C5orf13	chromosome 5 open reading frame 13	9315	1.15416	1.29482	1.31464	1.62976	1.98353	1.88888	2.82832	12.2952	159.374	1.14454e-18	2.7354e-17
201311_s_at	SH3BGRL	SH3 domain binding glutamic acid-rich protein like	6451	-1.1779	-1.31619	-1.27591	1.03948	1.0652	1.05486	1.11478	8.65826	20.1279	1.20262e-08	3.0029e-08
201312_s_at	SH3BGRL	SH3 domain binding glutamic acid-rich protein like	6451	-1.1831	-1.16641	-1.35907	-1.00878	1.16777	1.13857	1.23551	10.7169	15.7785	1.29628e-07	2.77617e-07
201313_at	ENO2	enolase 2 (gamma, neuronal)	2026	1.11469	-1.51312	-1.6037	-1.45077	-1.19467	1.20011	1.47182	7.42014	56.139	2.01732e-13	1.24343e-12
201315_x_at	IFITM2	interferon induced transmembrane protein 2 (1-8D)	10581	1.01192	-1.00571	1.01307	1.00315	-1.24371	1.07757	-1.65755	11.078	31.9436	1.0007e-10	3.56296e-10
201316_at	PSMA2	proteasome (prosome, macropain) subunit, alpha type, 2	5683	-1.11684	-1.29652	-1.41974	-1.63132	-1.75194	-2.00242	-1.43056	9.46509	52.2084	4.56184e-13	2.59415e-12
201317_s_at	PSMA2	proteasome (prosome, macropain) subunit, alpha type, 2	5683	-1.20583	-1.25943	-1.4487	-1.65475	-1.79679	-1.77628	-1.81165	12.2513	60.6495	8.4241e-14	5.6475e-13
201318_s_at	MYL12A /// MYL12B	myosin, light chain 12A, regulatory, non-sarcomeric /// myosin, light chain 12B, regulatory	103910 /// 10627	-1.58744	-1.63503	-1.71662	-1.71224	-1.96764	-1.97419	-2.11802	11.2533	58.9403	1.16422e-13	7.57386e-13
201319_at	MYL12A	myosin, light chain 12A, regulatory, non-sarcomeric	10627	-1.63566	-1.68856	-1.84285	-2.01199	-2.25144	-2.1482	-2.73114	11.038	64.475	4.20717e-14	3.01537e-13
201320_at	SMARCC2	SWI/SNF related, matrix associated, actin dependent regulator of chromatin, subfamily c, member 2	6601	1.14811	1.01537	1.22211	1.21893	1.39786	1.38359	1.57917	7.92843	9.95368	8.14692e-06	1.39361e-05
201321_s_at	SMARCC2	SWI/SNF related, matrix associated, actin dependent regulator of chromatin, subfamily c, member 2	6601	1.83747	1.71041	1.74145	1.99198	2.96904	2.4764	2.83407	7.83272	55.1251	2.477e-13	1.50108e-12
201322_at	ATP5B	ATP synthase, H+ transporting, mitochondrial F1 complex, beta polypeptide	506	1.07367	-1.09931	-1.16511	-1.09137	-1.15431	-1.16842	-1.10954	11.9437	6.66892	0.000187216	0.000276857
201323_at	EBNA1BP2	EBNA1 binding protein 2	10969	-1.27043	-1.86305	-1.85295	-1.80037	-1.96158	-2.35471	-2.27089	8.96565	50.6439	6.41363e-13	3.52879e-12
201326_at	CCT6A	chaperonin containing TCP1, subunit 6A (zeta 1)	908	1.01763	-1.13173	-1.2142	-1.32785	-1.32879	-1.73684	-1.301	10.3372	26.3503	7.65701e-10	2.32826e-09
201327_s_at	CCT6A	chaperonin containing TCP1, subunit 6A (zeta 1)	908	-1.03545	-1.15753	-1.19009	-1.34321	-1.38076	-1.75858	-1.796	10.9006	39.7292	9.42769e-12	4.05288e-11
201328_at	ETS2	v-ets erythroblastosis virus E26 oncogene homolog 2 (avian)	2114	1.19426	1.05189	1.11416	1.13445	1.29389	1.47393	1.00343	7.90642	8.32399	3.50172e-05	5.58547e-05
201329_s_at	ETS2	v-ets erythroblastosis virus E26 oncogene homolog 2 (avian)	2114	1.06934	-1.14802	-1.09703	1.08238	-1.02579	1.09719	-1.45197	6.45066	9.59118	1.11074e-05	1.86884e-05
201330_at	RARS	arginyl-tRNA synthetase	5917	-1.16018	-1.23673	-1.09603	-1.29868	-1.38797	-1.45124	-1.55209	9.65588	23.8508	2.15033e-09	6.06946e-09
201331_s_at	STAT6	signal transducer and activator of transcription 6, interleukin-4 induced	6778	1.26948	1.05159	1.15117	1.31067	1.16424	1.39274	-1.01801	8.23121	17.6221	4.46958e-08	1.02431e-07
201334_s_at	ARHGEF12	Rho guanine nucleotide exchange factor (GEF) 12	23365	1.15765	1.012	1.15248	1.55702	2.02093	1.55912	1.91366	9.02529	63.7367	4.79572e-14	3.39497e-13
201336_at	VAMP3	vesicle-associated membrane protein 3 (cellubrevin)	9341	-1.29773	-1.40747	-1.24678	-1.08427	-1.25927	-1.20793	-1.52708	9.75919	17.1251	5.90226e-08	1.32996e-07
201337_s_at	VAMP3	vesicle-associated membrane protein 3 (cellubrevin)	9341	-1.59211	-2.22254	-1.91964	-1.73267	-2.3018	-2.40556	-3.25864	6.3036	45.7836	1.97361e-12	9.77981e-12
201338_x_at	GTF3A	general transcription factor IIIA	2971	-1.38725	-1.20118	-1.26615	-1.28459	-1.3815	-1.5841	-1.30639	10.9911	12.3997	1.20563e-06	2.27616e-06
201340_s_at	ENC1	ectodermal-neural cortex (with BTB-like domain)	8507	1.00213	1.99917	1.94159	2.32063	2.7581	1.85851	2.87608	8.221	64.3232	4.32149e-14	3.08877e-13
201341_at	ENC1	ectodermal-neural cortex (with BTB-like domain)	8507	1.29577	2.31426	2.35676	2.5108	3.24825	2.49954	3.9491	10.023	226.07	1.81953e-20	7.37224e-19
201342_at	SNRPC	small nuclear ribonucleoprotein polypeptide C	6631	-1.17707	-1.23887	-1.16216	-1.34887	-1.36529	-1.41848	-1.44675	11.1654	11.5012	2.35155e-06	4.27706e-06
201343_at	UBE2D2	ubiquitin-conjugating enzyme E2D 2 (UBC4/5 homolog, yeast)	7322	1.17673	-1.14927	-1.20435	-1.16105	-1.04083	-1.08759	-1.10114	9.78078	9.13669	1.65673e-05	2.73775e-05
201344_at	UBE2D2	ubiquitin-conjugating enzyme E2D 2 (UBC4/5 homolog, yeast)	7322	1.33556	-1.1363	-1.12002	1.07323	1.27621	1.18905	1.75939	6.87457	24.0991	1.93292e-09	5.49891e-09
201345_s_at	UBE2D2	ubiquitin-conjugating enzyme E2D 2 (UBC4/5 homolog, yeast)	7322	-1.10499	-1.31119	-1.50496	-1.563	-1.576	-1.59	-1.92371	9.67399	33.0203	7.0138e-11	2.57067e-10
201348_at	GPX3	glutathione peroxidase 3 (plasma)	2878	1.16141	-1.28608	-1.33031	-1.5191	-1.69377	-1.36582	-1.57418	6.53124	27.3169	5.25238e-10	1.64274e-09
201349_at	SLC9A3R1	solute carrier family 9 (sodium/hydrogen exchanger), member 3 regulator 1	9368	1.02124	1.00579	1.47824	2.57523	1.33238	3.10557	2.31608	8.02453	110.124	8.76853e-17	1.23106e-15
201350_at	FLOT2	flotillin 2	2319	1.07245	-1.03159	-1.01325	-1.17038	-1.20429	-1.11683	-1.21466	8.22786	9.86663	8.77035e-06	1.49434e-05
201351_s_at	YME1L1	YME1-like 1 (S. cerevisiae)	10730	-1.02388	-1.13148	-1.13213	-1.26048	-1.25398	-1.54629	-1.51571	10.743	13.4267	5.85864e-07	1.1483e-06
201352_at	YME1L1	YME1-like 1 (S. cerevisiae)	10730	1.18185	-1.04342	-1.06232	1.37637	1.44698	1.46752	1.29942	10.7027	26.0948	8.47576e-10	2.55951e-09
201356_at	SF3A1	splicing factor 3a, subunit 1, 120kDa	10291	1.64192	-1.01683	1.09841	1.13321	1.26908	1.23699	1.07032	8.8186	26.6567	6.78607e-10	2.07879e-09
201357_s_at	SF3A1	splicing factor 3a, subunit 1, 120kDa	10291	1.20051	-1.02819	-1.02667	-1.085	-1.04597	-1.02102	-1.09782	6.86178	6.03512	0.00037879	0.000544087
201358_s_at	COPB1	coatomer protein complex, subunit beta 1	1315	-1.18362	-1.00305	1.0221	1.19807	1.08916	1.11777	1.16324	11.9082	7.53874	7.54744e-05	0.000116267
201359_at	COPB1	coatomer protein complex, subunit beta 1	1315	-1.24043	-1.08657	-1.02787	1.15231	1.05181	1.00418	1.05264	9.94866	9.1729	1.60403e-05	2.6571e-05
201360_at	CST3	cystatin C	1471	-1.48281	-1.27892	-1.06852	1.56996	1.31304	1.54443	1.63114	8.0999	42.6391	4.33558e-12	2.00438e-11
201361_at	TMEM109	transmembrane protein 109	79073	1.28046	1.08888	1.20921	1.23144	1.19175	1.11753	1.04248	8.3503	6.42084	0.000245569	0.000358995
201362_at	IVNS1ABP	influenza virus NS1A binding protein	10625	1.13251	1.27575	1.29908	1.33173	1.3644	1.01613	1.30126	9.75802	8.96377	1.93556e-05	3.17444e-05
201363_s_at	IVNS1ABP	influenza virus NS1A binding protein	10625	1.05758	1.1952	1.24717	1.28695	1.34873	-1.03492	1.27795	9.53226	10.0281	7.65174e-06	1.31315e-05
201364_s_at	OAZ2	ornithine decarboxylase antizyme 2	4947	1.20575	-1.18052	-1.30188	-1.55716	-1.84736	-1.80182	-1.81862	9.00097	92.7358	6.46864e-16	7.17137e-15
201365_at	OAZ2	ornithine decarboxylase antizyme 2	4947	1.74905	1.10616	1.00853	-1.0691	-1.09845	-1.18393	-1.04061	8.77657	41.6265	5.64944e-12	2.54421e-11
201366_at	ANXA7	annexin A7	310	-1.15132	-1.57059	-2.0459	-1.9773	-2.08207	-2.09228	-2.46506	8.99753	39.3906	1.0354e-11	4.41669e-11
201368_at	ZFP36L2	zinc finger protein 36, C3H type-like 2	678	2.465	1.61056	1.72269	1.11314	-1.02032	-1.11185	-1.54231	9.82429	132.783	9.8126e-18	1.79697e-16
201369_s_at	ZFP36L2	zinc finger protein 36, C3H type-like 2	678	1.89522	1.27414	1.41571	1.04174	-1.22945	-1.25683	-1.61687	6.71635	48.9155	9.45288e-13	4.99232e-12
201370_s_at	CUL3	cullin 3	8452	1.47487	1.08927	1.33043	1.56923	1.97983	1.49806	1.85262	7.84338	26.1659	8.23872e-10	2.49402e-09
201371_s_at	CUL3	cullin 3	8452	1.31078	-1.10832	1.05718	1.00344	1.12871	-1.16625	-1.12247	9.90128	10.153	6.89244e-06	1.18954e-05
201375_s_at	PPP2CB	protein phosphatase 2 (formerly 2A), catalytic subunit, beta isoform	5516	-1.13346	-1.2202	-1.18493	-1.04581	-1.03102	-1.13544	1.0249	11.2648	5.60096	0.000628021	0.000881997
201376_s_at	HNRNPF	heterogeneous nuclear ribonucleoprotein F	3185	1.65346	1.31171	1.25902	1.18806	1.10249	-1.08095	-1.21222	8.83195	28.9545	2.84522e-10	9.31089e-10
201377_at	UBAP2L	ubiquitin associated protein 2-like	9898	1.72404	-1.05327	-1.10994	1.03297	1.00995	1.02222	-1.22558	7.89296	28.2037	3.75421e-10	1.20097e-09
201379_s_at	TPD52L2	tumor protein D52-like 2	7165	1.00438	-1.17362	-1.15049	-1.06522	-1.18649	-1.19028	-1.35987	9.02317	7.2642	9.98458e-05	0.000151684
201380_at	CRTAP	cartilage associated protein	10491	-1.10671	-1.46386	-1.5494	-1.28961	-1.58508	-1.22342	-1.87651	7.26722	24.3895	1.70837e-09	4.90422e-09
201381_x_at	CACYBP	calcyclin binding protein	27101	-1.15557	-1.15395	-1.21302	-1.67536	-1.70905	-2.23099	-1.86639	10.9983	64.0047	4.5724e-14	3.25197e-13
201383_s_at	LOC100133166 /// NBR1	similar to neighbor of BRCA1 gene 1 /// neighbor of BRCA1 gene 1	100133166 /// 4077	-1.09532	-1.00578	1.08636	1.14483	1.11391	1.31198	1.04059	7.10213	8.74878	2.35494e-05	3.82834e-05
201384_s_at	LOC100133166 /// NBR1	similar to neighbor of BRCA1 gene 1 /// neighbor of BRCA1 gene 1	100133166 /// 4077	-1.00721	1.00645	1.1031	1.45856	1.46449	1.62516	1.6209	9.04094	22.2829	4.31107e-09	1.15617e-08
201385_at	DHX15	DEAH (Asp-Glu-Ala-His) box polypeptide 15	1665	1.05278	-1.05955	-1.07296	-1.15193	-1.09552	-1.35265	-1.19783	12.0569	12.876	8.58163e-07	1.64801e-06
201386_s_at	DHX15	DEAH (Asp-Glu-Ala-His) box polypeptide 15	1665	1.04973	-1.09757	-1.08778	-1.23404	-1.1504	-1.48602	-1.39327	10.4191	17.8002	4.05183e-08	9.34522e-08
201387_s_at	UCHL1	ubiquitin carboxyl-terminal esterase L1 (ubiquitin thiolesterase)	7345	-1.22525	-1.64957	-1.63574	-2.18825	-2.02699	-2.18916	-1.35183	11.4603	84.9066	1.79405e-15	1.79176e-14
201388_at	PSMD3	proteasome (prosome, macropain) 26S subunit, non-ATPase, 3	5709	1.36048	-1.1936	-1.25808	-1.10795	-1.21055	-1.18103	-1.3915	7.72371	16.4481	8.71047e-08	1.91286e-07
201391_at	TRAP1	TNF receptor-associated protein 1	10131	1.15167	-1.21924	-1.2374	-1.22851	-1.28476	-1.29845	-1.38943	9.45009	23.0432	3.06152e-09	8.41333e-09
201392_s_at	IGF2R	insulin-like growth factor 2 receptor	3482	1.87161	1.43245	1.84488	1.78495	1.7691	1.30032	1.12322	8.42151	26.606	6.92243e-10	2.11706e-09
201393_s_at	IGF2R	insulin-like growth factor 2 receptor	3482	1.7266	1.3499	1.54481	1.53455	1.58764	1.26545	1.03613	9.03554	29.7924	2.10337e-10	7.06234e-10
201394_s_at	RBM5	RNA binding motif protein 5	10181	1.28857	1.58512	1.80003	2.01236	2.2158	1.78278	1.94772	8.76822	44.4861	2.71399e-12	1.30423e-11
201395_at	RBM5	RNA binding motif protein 5	10181	1.27204	1.66821	1.9569	2.2008	2.25808	1.91183	2.23417	10.734	89.4792	9.78545e-16	1.04379e-14
201396_s_at	SGTA	small glutamine-rich tetratricopeptide repeat (TPR)-containing, alpha	6449	1.22756	-1.0913	-1.08997	1.00586	-1.02728	1.00444	1.05854	7.52028	5.8256	0.0004823	0.000685138
201397_at	PHGDH	phosphoglycerate dehydrogenase	26227	1.17145	1.01522	1.20601	1.28761	1.00403	-1.04221	-1.68337	10.1723	54.0737	3.07606e-13	1.82571e-12
201398_s_at	TRAM1	translocation associated membrane protein 1	23471	-1.33601	-1.2279	-1.2033	-1.11435	-1.35458	-1.35747	-1.33123	10.768	10.2617	6.29783e-06	1.09106e-05
201399_s_at	TRAM1	translocation associated membrane protein 1	23471	-1.66059	-1.47336	-1.34674	-1.43134	-1.84888	-1.99327	-2.0316	8.08782	28.2453	3.69635e-10	1.18509e-09
201400_at	PSMB3	proteasome (prosome, macropain) subunit, beta type, 3	5691	-1.32782	-1.41294	-1.39564	-1.65314	-1.74545	-1.80469	-1.68316	11.1746	32.3054	8.87009e-11	3.19548e-10
201403_s_at	MGST3	microsomal glutathione S-transferase 3	4259	-1.8235	-1.50053	-1.36729	-1.35436	-1.72248	-1.53885	-1.4011	11.1021	25.1602	1.23835e-09	3.64243e-09
201406_at	HNRNPH2 /// RPL36A /// RPL36AP37	heterogeneous nuclear ribonucleoprotein H2 (H') /// ribosomal protein L36a /// ribosomal protein L36a pseudogene 37	3188 /// 6173 /// 729362	-1.20883	-1.1725	-1.09573	-1.16417	-1.28545	-1.28275	-1.22927	13.3219	8.66237	2.5503e-05	4.12808e-05
201410_at	PLEKHB2	pleckstrin homology domain containing, family B (evectins) member 2	55041	-1.05586	-1.27431	-1.36745	-1.42594	-1.31648	-1.58912	-1.32543	9.3915	8.33858	3.45361e-05	5.5128e-05
201411_s_at	PLEKHB2	pleckstrin homology domain containing, family B (evectins) member 2	55041	1.04647	-1.24898	-1.37244	-1.42609	-1.38678	-1.87952	-1.48349	8.18104	22.8722	3.3038e-09	9.03415e-09
201412_at	LRP10	low density lipoprotein receptor-related protein 10	26020	1.12201	1.01387	1.25254	1.62998	1.38949	1.66443	1.65197	7.69287	24.5909	1.56928e-09	4.53454e-09
201413_at	HSD17B4	hydroxysteroid (17-beta) dehydrogenase 4	3295	1.29556	-1.07354	-1.12784	-1.3407	-1.35528	-1.53108	-1.55543	10.23	36.1456	2.64222e-11	1.04604e-10
201414_s_at	NAP1L4	nucleosome assembly protein 1-like 4	4676	1.21317	1.02771	1.02501	1.09812	1.03773	-1.14619	-1.131	9.01491	9.94678	8.19457e-06	1.4013e-05
201416_at	SOX4	SRY (sex determining region Y)-box 4	6659	1.41406	1.22186	1.59953	1.71801	2.42395	1.97641	2.97155	11.1468	158.393	1.23101e-18	2.90459e-17
201417_at	SOX4	SRY (sex determining region Y)-box 4	6659	1.40325	1.18122	1.45564	1.66223	2.35633	1.91564	2.81485	11.6454	104.223	1.66612e-16	2.15577e-15
201418_s_at	SOX4	SRY (sex determining region Y)-box 4	6659	1.22786	1.12441	1.27854	1.45455	1.83148	1.6654	2.33936	8.75002	46.9376	1.49687e-12	7.59597e-12
201420_s_at	WDR77	WD repeat domain 77	79084	1.12928	1.02958	1.01181	-1.12738	-1.25121	-1.40167	-1.50374	8.56448	30.4766	1.65253e-10	5.65477e-10
201421_s_at	WDR77	WD repeat domain 77	79084	1.24391	-1.09443	-1.04499	-1.14675	-1.16586	-1.49122	-1.55541	8.77762	27.1083	5.69184e-10	1.76782e-09
201422_at	IFI30	interferon, gamma-inducible protein 30	10437	-1.09735	-1.40386	-1.69203	-1.96726	-2.05192	-1.89881	-1.9277	7.91819	61.4943	7.20171e-14	4.90537e-13
201423_s_at	CUL4A	cullin 4A	8451	1.2462	-1.13549	-1.06061	-1.19285	-1.25974	-1.73074	-1.87981	8.01485	82.6009	2.46463e-15	2.3618e-14
201424_s_at	CUL4A	cullin 4A	8451	1.29844	1.03197	-1.27604	-1.25699	-1.25019	-1.56615	-2.05545	9.11972	23.0842	3.00646e-09	8.27957e-09
201425_at	ALDH2	aldehyde dehydrogenase 2 family (mitochondrial)	217	-1.20068	-1.42652	-1.08507	1.45632	1.06819	1.22968	-1.03557	8.94395	33.1469	6.73135e-11	2.47379e-10
201426_s_at	VIM	vimentin	7431	-2.547	-2.42082	-1.59475	1.06839	1.30546	1.21844	1.36311	12.9323	332.082	1.85522e-22	1.41079e-20
201427_s_at	SEPP1	selenoprotein P, plasma, 1	6414	3.73172	4.21877	4.52053	6.49511	3.56588	6.88571	11.0892	10.174	152.084	1.98803e-18	4.41068e-17
201428_at	CLDN4	claudin 4	1364	1.28802	1.50761	1.60386	1.15872	-1.03742	1.10444	1.15397	6.3683	19.8306	1.39521e-08	3.44663e-08
201430_s_at	DPYSL3	dihydropyrimidinase-like 3	1809	2.17415	1.46378	1.06115	-1.37016	-1.70655	-2.37849	-1.90484	7.79654	144.056	3.76536e-18	7.66401e-17
201431_s_at	DPYSL3	dihydropyrimidinase-like 3	1809	1.47994	-1.08279	-1.2392	-1.3783	-1.09331	-1.21067	1.23451	10.5335	43.9591	3.09643e-12	1.47436e-11
201433_s_at	PTDSS1	phosphatidylserine synthase 1	9791	-1.03892	-1.38632	-1.35745	-1.42342	-1.44511	-1.55893	-1.38013	9.27384	29.1067	2.69173e-10	8.84432e-10
201434_at	TTC1	tetratricopeptide repeat domain 1	7265	-1.35969	-1.60267	-1.68172	-1.92888	-2.09818	-2.33789	-1.9744	8.98891	54.7279	2.68701e-13	1.61654e-12
201435_s_at	EIF4E	eukaryotic translation initiation factor 4E	1977	-1.15379	-1.29348	-1.41733	-1.70957	-1.85395	-2.17572	-2.28347	10.4779	27.1126	5.68233e-10	1.76508e-09
201436_at	EIF4E	eukaryotic translation initiation factor 4E	1977	1.04602	-1.09981	-1.52948	-1.63225	-1.91127	-1.80067	-1.97777	9.17035	30.1413	1.85881e-10	6.29748e-10
201437_s_at	EIF4E	eukaryotic translation initiation factor 4E	1977	-1.05823	-1.08379	-1.54062	-1.69457	-1.76872	-1.9406	-2.0925	10.1027	10.7747	4.14936e-06	7.3265e-06
201438_at	COL6A3	collagen, type VI, alpha 3	1293	1.40093	3.96381	8.81429	23.2464	20.4479	23.2056	7.49753	9.213	839.758	2.69075e-27	1.18261e-24
201440_at	DDX23	DEAD (Asp-Glu-Ala-Asp) box polypeptide 23	9416	1.36567	1.1559	1.15693	1.27266	1.20943	-1.01994	1.1108	8.13981	8.99227	1.8863e-05	3.09796e-05
201441_at	COX6B1	cytochrome c oxidase subunit Vib polypeptide 1 (ubiquitous)	1340	-1.51059	-1.38922	-1.44033	-1.5466	-1.74303	-1.68897	-1.47482	11.4971	25.5184	1.06936e-09	3.17258e-09
201443_s_at	ATP6AP2	ATPase, H+ transporting, lysosomal accessory protein 2	10159	-1.18093	-1.27694	-1.39554	-1.30616	-1.3112	-1.33725	-1.30715	10.7247	5.95681	0.00041437	0.00059296
201444_s_at	ATP6AP2	ATPase, H+ transporting, lysosomal accessory protein 2	10159	-1.3405	-1.46557	-1.39789	-1.33286	-1.5266	-1.6867	-1.60202	8.83901	12.5671	1.06875e-06	2.03001e-06
201446_s_at	TIA1	TIA1 cytotoxic granule-associated RNA binding protein	7072	1.20922	1.95958	1.9038	1.86367	2.00252	1.41161	1.85123	9.60874	28.6936	3.13068e-10	1.01744e-09
201447_at	TIA1	TIA1 cytotoxic granule-associated RNA binding protein	7072	1.14896	1.45843	1.42946	1.49251	1.87732	1.20877	1.72361	9.15661	31.1845	1.29389e-10	4.51875e-10
201448_at	TIA1	TIA1 cytotoxic granule-associated RNA binding protein	7072	1.25529	1.8441	1.6247	1.76843	2.26313	1.45859	2.24044	10.6239	40.5664	7.50082e-12	3.29566e-11
201449_at	TIA1	TIA1 cytotoxic granule-associated RNA binding protein	7072	1.10074	1.21632	1.09571	1.43111	1.78904	1.06505	1.75745	8.9509	21.8175	5.34171e-09	1.40926e-08
201450_s_at	TIA1	TIA1 cytotoxic granule-associated RNA binding protein	7072	1.18207	1.68511	1.55974	1.54428	2.04854	1.28642	1.56543	10.0904	12.557	1.0765e-06	2.04339e-06
201453_x_at	RHEB	Ras homolog enriched in brain	6009	-1.10494	-1.4082	-1.35951	-1.43551	-1.3462	-1.42592	-1.41703	11.423	18.4923	2.78768e-08	6.57754e-08
201454_s_at	NPEPPS	aminopeptidase puromycin sensitive	9520	1.31762	1.13508	1.39708	1.41017	1.5068	1.29469	1.38276	10.0072	11.4089	2.52387e-06	4.57284e-06
201455_s_at	NPEPPS	aminopeptidase puromycin sensitive	9520	1.22943	1.13206	1.12426	1.286	1.32643	1.28003	1.35501	9.29255	8.99982	1.87349e-05	3.07789e-05
201456_s_at	BUB3	budding uninhibited by benzimidazoles 3 homolog (yeast)	9184	1.08523	1.1869	1.30223	1.00711	1.10432	-1.20647	-1.16588	9.79963	13.8873	4.29545e-07	8.57205e-07
201457_x_at	BUB3	budding uninhibited by benzimidazoles 3 homolog (yeast)	9184	-1.06624	-1.21925	-1.24686	-1.4513	-1.27729	-1.68368	-1.42973	9.81912	21.676	5.70557e-09	1.49915e-08
201459_at	RUVBL2	RuvB-like 2 (E. coli)	10856	1.18372	-1.22809	-1.22725	-1.04817	-1.10695	-1.05857	-1.18698	9.26794	8.33043	3.48041e-05	5.55354e-05
201460_at	MAPKAPK2	mitogen-activated protein kinase-activated protein kinase 2	9261	1.11349	-1.14228	-1.03463	-1.07878	-1.04233	-1.14403	-1.20282	8.38764	5.87898	0.000453316	0.000645983
201462_at	SCRN1	secernin 1	9805	-1.55724	-2.14502	-2.69717	-1.82953	-1.79768	-1.50226	-1.26999	8.83921	91.1323	7.91699e-16	8.61862e-15
201463_s_at	LOC100133665 /// TALDO1	similar to transaldolase /// transaldolase 1	100133665 /// 6888	-1.05035	-1.51476	-1.61098	-1.74509	-1.77668	-1.95401	-1.81272	10.5324	50.242	7.01136e-13	3.83084e-12
201464_x_at	JUN	jun oncogene	3725	1.38919	-1.21166	-1.01506	1.60641	1.89298	1.72741	1.83053	9.18913	100.285	2.60797e-16	3.20812e-15
201465_s_at	JUN	jun oncogene	3725	1.15944	-1.16094	1.06465	1.55675	1.54335	1.37414	1.44807	7.15213	16.7326	7.38499e-08	1.63871e-07
201466_s_at	JUN	jun oncogene	3725	1.25084	-1.14825	1.14985	2.25435	2.70661	2.69832	2.92235	7.54378	181.859	2.40544e-19	6.91523e-18
201467_s_at	NQO1	NAD(P)H dehydrogenase, quinone 1	1728	-6.18091	-8.35865	-5.16154	-7.43502	-11.3666	-9.85285	-16.0245	7.81918	316.81	3.25693e-22	2.28877e-20
201468_s_at	NQO1	NAD(P)H dehydrogenase, quinone 1	1728	-4.73268	-6.57363	-4.28222	-5.25544	-7.15578	-6.50681	-10.2267	8.34332	213.157	3.65995e-20	1.34428e-18
201470_at	GSTO1	glutathione S-transferase omega 1	9446	-1.14548	1.01805	1.11044	-1.00304	-1.36541	-1.20701	-1.90337	11.3673	59.4348	1.05925e-13	6.95732e-13
201471_s_at	SQSTM1	sequestosome 1	8878	-1.28369	-2.40111	-2.10077	-2.16918	-2.34399	-2.20101	-2.25749	8.97255	89.0059	1.04047e-15	1.10214e-14
201472_at	VBP1	von Hippel-Lindau binding protein 1	7411	-1.1126	-1.04239	-1.12891	-1.13293	-1.15437	-1.33102	-1.07155	10.7915	6.371	0.000259505	0.000378556
201475_x_at	MARS	methionyl-tRNA synthetase	4141	1.11916	-1.19128	-1.02953	-1.10287	-1.15349	-1.28244	-1.56687	9.69811	21.801	5.38283e-09	1.41953e-08
201476_s_at	RRM1	ribonucleotide reductase M1	6240	-1.03273	1.06397	1.12197	-1.00249	1.03282	-1.24907	-1.16127	7.75435	8.0833	4.40935e-05	6.96236e-05
201477_s_at	RRM1	ribonucleotide reductase M1	6240	-1.07529	1.15219	1.1007	1.04195	1.14824	-1.09607	1.02848	11.246	8.11854	4.26193e-05	6.74249e-05
201478_s_at	DKC1	dyskeratosis congenita 1, dyskerin	1736	1.15588	-1.26472	-1.18139	-1.402	-1.47483	-2.15311	-2.48647	9.84204	106.705	1.26653e-16	1.69553e-15
201479_at	DKC1	dyskeratosis congenita 1, dyskerin	1736	1.12875	-1.21756	-1.20584	-1.43712	-1.35827	-1.9129	-1.97187	10.2057	85.5828	1.63708e-15	1.65051e-14
201480_s_at	SUPT5H	suppressor of Ty 5 homolog (S. cerevisiae)	6829	1.34688	-1.06933	1.05343	1.09154	1.07006	1.0604	1.04108	8.29179	7.10318	0.000117997	0.00017807
201483_s_at	SUPT4H1	suppressor of Ty 4 homolog 1 (S. cerevisiae)	6827	-1.41582	-1.31207	-1.3062	-1.31265	-1.61145	-1.54514	-1.51165	9.97683	13.7352	4.75482e-07	9.43433e-07
201484_at	SUPT4H1	suppressor of Ty 4 homolog 1 (S. cerevisiae)	6827	-1.22695	-1.32503	-1.23732	-1.23138	-1.2631	-1.34614	-1.12698	8.4256	8.98658	1.89603e-05	3.11237e-05
201487_at	CTSC	cathepsin C	1075	-1.05972	-1.70617	-2.07502	-3.28031	-3.46557	-4.36878	-6.79403	10.3427	463.87	3.38488e-24	4.84935e-22
201488_x_at	KHDRBS1	KH domain containing, RNA binding, signal transduction associated 1	10657	1.58296	1.16929	1.23322	1.40589	1.58218	1.36638	1.34956	10.8933	24.4663	1.65384e-09	4.75558e-09
201489_at	PPIF	peptidylprolyl isomerase F	10105	-1.09503	-1.77843	-1.57854	-1.35137	-1.33902	-1.48597	-1.46037	8.68947	33.0475	6.952e-11	2.54946e-10
201490_s_at	PPIF	peptidylprolyl isomerase F	10105	1.08742	-1.53001	-1.38859	-1.1591	-1.23772	-1.23275	-1.40438	7.62349	22.0091	4.88815e-09	1.29938e-08
201491_at	AHSA1	AHA1, activator of heat shock 90kDa protein ATPase homolog 1 (yeast)	10598	1.14683	1.14013	1.17897	1.01995	-1.01216	-1.36511	-1.05389	10.133	20.7316	8.9428e-09	2.27662e-08
201493_s_at	PUM2	pumilio homolog 2 (Drosophila)	23369	1.0411	1.1636	1.24993	1.12212	1.30518	-1.05012	1.06389	9.61062	5.71504	0.000548858	0.000775103
201494_at	PRCP	prolylcarboxypeptidase (angiotensinase C)	5547	-1.34592	-1.3198	-1.32695	-1.28086	-1.43443	-1.33234	-1.74913	9.71061	22.9068	3.25321e-09	8.90708e-09
201498_at	USP7	ubiquitin specific peptidase 7 (herpes virus-associated)	7874	1.68513	1.00159	1.08471	1.11015	1.4169	1.01634	1.04267	9.70546	19.7038	1.48732e-08	3.66299e-08
201499_s_at	USP7	ubiquitin specific peptidase 7 (herpes virus-associated)	7874	1.62872	-1.03543	1.08271	1.00208	1.0531	-1.09343	-1.27335	9.33773	40.4212	7.80198e-12	3.4163e-11
201500_s_at	PPP1R11	protein phosphatase 1, regulatory (inhibitor) subunit 11	6992	1.07974	1.03564	1.09359	1.17906	1.23011	1.28166	1.48235	8.97244	14.8037	2.36875e-07	4.88889e-07
201501_s_at	GRSF1	G-rich RNA sequence binding factor 1	2926	-1.00086	-1.50126	-1.59387	-1.40137	-1.40163	-1.45042	-1.54447	9.11164	14.6328	2.64111e-07	5.4131e-07
201503_at	G3BP1	GTPase activating protein (SH3 domain) binding protein 1	10146	1.14226	1.10235	-1.05083	-1.13019	-1.06305	-1.45844	-1.36578	11.2741	12.6961	9.74667e-07	1.85935e-06
201504_s_at	TSN	translin	7247	-1.3338	-1.63627	-1.57777	-1.63528	-1.7651	-2.43519	-2.00683	7.92302	53.7557	3.28683e-13	1.9353e-12
201505_at	LAMB1	laminin, beta 1	3912	1.79126	2.19012	2.77249	3.97506	2.41671	2.68143	1.90641	9.56605	58.4834	1.2713e-13	8.20871e-13
201506_at	TGFBI	transforming growth factor, beta-induced, 68kDa	7045	-1.11957	1.26698	1.67203	2.23326	2.00681	2.96698	2.43882	8.65582	108.854	1.0038e-16	1.38529e-15
201507_at	PFDN1	prefoldin subunit 1	5201	-1.47239	-1.47631	-1.34416	-1.34689	-1.33884	-1.34864	-1.22268	9.20226	12.7839	9.15789e-07	1.75154e-06
201509_at	IDH3B	isocitrate dehydrogenase 3 (NAD+) beta	3420	1.03397	-1.3191	-1.29741	-1.26656	-1.28683	-1.33885	-1.36385	8.48657	13.554	5.37286e-07	1.05869e-06
201510_at	ELF3	E74-like factor 3 (ets domain transcription factor, epithelial-specific )	1999	1.58476	1.32683	1.54646	1.58856	1.18917	1.86447	1.59319	6.22152	10.9798	3.52512e-06	6.27859e-06
201511_at	AAMP	angio-associated, migratory cell protein	14	1.42844	1.1083	1.15595	1.18982	1.02106	1.1766	-1.02069	8.6855	10.8837	3.80407e-06	6.74669e-06
201512_s_at	TOMM70A	translocase of outer mitochondrial membrane 70 homolog A (S. cerevisiae)	9868	-1.30449	-1.41751	-1.53557	-1.61092	-2.19693	-2.37184	-2.81593	8.45536	119.523	3.36743e-17	5.30181e-16
201513_at	TSN	translin	7247	1.06593	-1.3238	-1.44666	-1.18326	-1.1993	-1.79822	-1.54974	6.88096	23.9882	2.02694e-09	5.74244e-09
201514_s_at	G3BP1	GTPase activating protein (SH3 domain) binding protein 1	10146	1.05167	-1.12567	-1.05225	-1.32336	-1.30043	-2.10294	-2.04004	8.82069	31.2263	1.27555e-10	4.45831e-10
201515_s_at	TSN	translin	7247	1.10326	-1.04274	-1.0937	-1.01911	1.03694	-1.26689	-1.19341	10.2756	9.1498	1.63745e-05	2.70881e-05
201516_at	SRM	spermidine synthase	6723	1.50845	-1.20922	-1.24195	-1.20735	-1.26627	-1.22577	-1.44835	8.36039	38.5692	1.30366e-11	5.47489e-11
201517_at	NCBP2	nuclear cap binding protein subunit 2, 20kDa	22916	1.14419	-1.04617	-1.05751	1.11147	1.27839	1.03762	1.10811	9.76124	11.336	2.66963e-06	4.82648e-06
201518_at	CBX1	chromobox homolog 1 (HP1 beta homolog Drosophila )	10951	1.54382	1.34734	1.37877	1.46913	1.83005	1.4548	1.53194	11.4672	25.5437	1.05841e-09	3.14274e-09
201519_at	TOMM70A	translocase of outer mitochondrial membrane 70 homolog A (S. cerevisiae)	9868	1.31545	-1.04579	-1.12645	1.03272	1.18157	1.00971	1.20751	9.16711	14.7549	2.44331e-07	5.03277e-07
201520_s_at	GRSF1	G-rich RNA sequence binding factor 1	2926	-1.20836	-1.7319	-1.60833	-1.71571	-1.78718	-1.80826	-2.46201	8.91522	55.8104	2.15527e-13	1.32092e-12
201521_s_at	NCBP2	nuclear cap binding protein subunit 2, 20kDa	22916	-1.31158	-1.49761	-1.44497	-1.60244	-1.83176	-2.07487	-2.37294	7.64176	23.6399	2.35586e-09	6.60358e-09
201522_x_at	SNRPN /// SNURF	small nuclear ribonucleoprotein polypeptide N /// SNRPN upstream reading frame	6638 /// 8926	-1.13243	-1.96586	-2.41573	-2.87779	-2.7833	-2.75433	-3.25727	11.4589	208.981	4.62905e-20	1.65111e-18
201523_x_at	UBE2N	ubiquitin-conjugating enzyme E2N (UBC13 homolog, yeast)	7334	-1.18266	-1.33518	-1.30772	-1.56872	-1.62145	-1.98357	-1.66723	10.1182	40.4087	7.82833e-12	3.42668e-11
201524_x_at	UBE2N	ubiquitin-conjugating enzyme E2N (UBC13 homolog, yeast)	7334	-1.11801	-1.25337	-1.22112	-1.3968	-1.36328	-1.72223	-1.46705	11.6308	31.9846	9.87058e-11	3.51972e-10
201527_at	ATP6V1F	ATPase, H+ transporting, lysosomal 14kDa, V1 subunit F	9296	-1.34043	-1.27398	-1.19516	-1.09814	-1.18128	-1.0951	1.0938	10.0619	10.6633	4.53729e-06	7.97671e-06
201528_at	RPA1	replication protein A1, 70kDa	6117	1.07445	-1.0364	-1.1384	-1.24703	-1.15179	-1.39013	-1.79863	10.6225	34.9754	3.77357e-11	1.45268e-10
201529_s_at	RPA1	replication protein A1, 70kDa	6117	1.09602	-1.12844	-1.09784	-1.18575	-1.21398	-1.5233	-1.83475	9.37441	42.6182	4.3591e-12	2.01322e-11
201530_x_at	EIF4A1	eukaryotic translation initiation factor 4A, isoform 1	1973	-1.017	-1.20961	-1.1662	-1.31258	-1.37368	-1.44675	-1.57917	12.8718	35.7598	2.96822e-11	1.16355e-10
201531_at	ZFP36	zinc finger protein 36, C3H type, homolog (mouse)	7538	1.11854	-1.04705	-1.00991	1.00785	-1.0058	1.27327	1.04096	6.73311	7.67232	6.60112e-05	0.00010234
201532_at	PSMA3	proteasome (prosome, macropain) subunit, alpha type, 3	5684	-1.11023	-1.2288	-1.22608	-1.52961	-1.68657	-1.96463	-1.83098	11.522	66.0029	3.2228e-14	2.36542e-13
201534_s_at	UBL3	ubiquitin-like 3	5412	1.1967	1.26616	1.23976	1.67043	1.64673	1.39323	1.44128	8.19262	11.6782	2.05562e-06	3.76921e-06
201535_at	UBL3	ubiquitin-like 3	5412	1.34262	1.20819	1.2485	1.568	1.78137	1.71828	2.03136	8.93765	26.7545	6.53111e-10	2.0078e-09
201536_at	DUSP3	dual specificity phosphatase 3	1845	-1.08795	-1.29743	-1.05611	1.174	1.26612	1.13186	1.23743	7.90519	30.9974	1.37966e-10	4.79057e-10
201537_s_at	DUSP3	dual specificity phosphatase 3	1845	-1.17781	-1.39401	-1.50758	-1.42252	-1.53929	-1.40988	-1.66677	6.54749	13.2563	6.58482e-07	1.28297e-06
201539_s_at	FHL1	four and a half LIM domains 1	2273	-1.08547	-1.3788	-1.78822	-1.47585	-1.40049	-1.36711	-1.33546	6.7324	10.3305	5.95005e-06	1.0335e-05
201540_at	FHL1	four and a half LIM domains 1	2273	1.00928	-1.50793	-1.71957	-1.32633	1.0152	1.0402	1.54621	10.6646	101.964	2.14999e-16	2.69852e-15
201541_s_at	ZNHIT1	zinc finger, HIT type 1	10467	-1.66543	-1.55745	-1.56408	-1.17931	-1.39899	-1.23918	-1.08288	9.32758	24.633	1.54183e-09	4.46069e-09
201543_s_at	SAR1A	SAR1 homolog A (S. cerevisiae)	56681	-1.47039	-1.43919	-1.49638	-1.56899	-2.12603	-2.03936	-2.48482	8.62193	46.8827	1.51649e-12	7.68498e-12
201544_x_at	PABPN1	poly(A) binding protein, nuclear 1	8106	1.66045	1.21205	1.31502	1.21519	1.37135	1.11665	1.02232	11.2201	30.2896	1.76433e-10	6.00642e-10
201545_s_at	PABPN1	poly(A) binding protein, nuclear 1	8106	1.62962	1.23579	1.20783	1.19163	1.31405	1.04621	1.06712	9.46038	19.7242	1.47209e-08	3.6279e-08
201546_at	TRIP12	thyroid hormone receptor interactor 12	9320	1.03184	-1.00041	1.08468	1.09656	1.07334	-1.17424	-1.1303	9.41525	7.14367	0.00011312	0.000170919
201548_s_at	KDM5B	lysine (K)-specific demethylase 5B	10765	1.33835	1.23531	1.4739	1.40075	1.43147	1.37445	1.11339	9.49308	15.2783	1.75968e-07	3.69895e-07
201549_x_at	KDM5B	lysine (K)-specific demethylase 5B	10765	1.23425	-1.06202	-1.00856	1.07358	1.07914	1.11378	-1.15541	9.15954	7.29062	9.7167e-05	0.000147813
201550_x_at	ACTG1	actin, gamma 1	71	1.15929	-1.12712	-1.05071	1.16742	1.2625	1.31129	1.2947	13.8862	32.0176	9.76219e-11	3.4849e-10
201552_at	LAMP1	lysosomal-associated membrane protein 1	3916	1.54779	-1.0517	1.08088	1.13686	1.12244	1.11094	-1.03306	9.78923	19.2289	1.89529e-08	4.58973e-08
201553_s_at	LAMP1	lysosomal-associated membrane protein 1	3916	1.48946	-1.19188	-1.00703	1.08248	1.09957	1.02895	-1.05533	11.0872	13.8847	4.30278e-07	8.58535e-07
201554_x_at	GYG1	glycogenin 1	2992	-1.39581	-1.70191	-1.69594	-1.52608	-1.71947	-1.86551	-1.73504	8.81133	35.3416	3.37147e-11	1.31053e-10
201555_at	MCM3	minichromosome maintenance complex component 3	4172	1.55397	1.02473	-1.09194	-1.23502	-1.22299	-1.63379	-2.17904	10.0633	110.428	8.49028e-17	1.19914e-15
201558_at	RAE1	RAE1 RNA export 1 homolog (S. pombe)	8480	1.36381	1.2393	1.27688	1.45229	1.54773	1.32942	1.30225	9.86231	19.3064	1.82123e-08	4.42483e-08
201559_s_at	CLIC4	chloride intracellular channel 4	25932	-1.08828	-1.25554	-1.25015	-1.82801	-1.80093	-2.44515	-2.71944	7.30887	67.4017	2.53771e-14	1.9085e-13
201560_at	CLIC4	chloride intracellular channel 4	25932	1.18372	1.02565	-1.13365	-1.24587	-1.18731	-1.37052	-1.72188	11.016	39.6653	9.59547e-12	4.1209e-11
201561_s_at	CLSTN1	calsyntenin 1	22883	1.61176	1.15217	1.34938	1.54391	1.74784	1.71256	1.72583	7.87014	18.2321	3.20422e-08	7.49694e-08
201562_s_at	SORD	sorbitol dehydrogenase	6652	1.1008	-1.13697	-1.05287	1.06834	-1.13837	-1.01643	-1.2341	7.8412	8.55253	2.82427e-05	4.55137e-05
201563_at	SORD	sorbitol dehydrogenase	6652	1.01507	-1.15163	-1.16566	1.06699	-1.16175	-1.07125	-1.34994	9.60087	13.1996	6.84758e-07	1.33127e-06
201564_s_at	FSCN1	fascin homolog 1, actin-bundling protein (Strongylocentrotus purpuratus)	6624	-1.03789	-1.27187	-1.06209	1.21463	1.01923	-1.06434	-1.32471	8.7814	7.78904	5.87866e-05	9.16193e-05
201565_s_at	ID2	inhibitor of DNA binding 2, dominant negative helix-loop-helix protein	3398	1.19729	1.62995	1.8135	1.99594	2.09537	1.75951	1.7025	11.5412	37.1426	1.96598e-11	7.97397e-11
201566_x_at	ID2	inhibitor of DNA binding 2, dominant negative helix-loop-helix protein	3398	1.13541	1.61346	1.57957	1.72892	1.8829	1.66498	1.59524	10.5235	19.4894	1.65832e-08	4.05221e-08
201567_s_at	GOLGA4	golgi autoantigen, golgin subfamily a, 4	2803	1.49714	1.66004	1.73106	1.61568	1.64588	1.17673	1.30839	9.47389	19.8906	1.35381e-08	3.35138e-08
201568_at	UQCRQ	ubiquinol-cytochrome c reductase, complex III subunit VII, 9.5kDa	27089	-1.57176	-1.49061	-1.45409	-1.54718	-1.46806	-1.5067	-1.19342	11.3096	15.8798	1.21961e-07	2.62083e-07
201569_s_at	SAMM50	sorting and assembly machinery component 50 homolog (S. cerevisiae)	25813	-1.134	-1.6936	-1.61099	-1.55114	-1.83525	-2.05783	-1.89589	9.26299	34.0089	5.10632e-11	1.91818e-10
201570_at	SAMM50	sorting and assembly machinery component 50 homolog (S. cerevisiae)	25813	1.08379	-1.30822	-1.27694	-1.16005	-1.35535	-1.35693	-1.4115	8.93744	16.7533	7.29742e-08	1.62067e-07
201571_s_at	DCTD	dCMP deaminase	1635	-1.54453	-1.43154	-1.3075	-1.26254	-1.60584	-1.52529	-1.89401	7.63952	17.3037	5.33715e-08	1.21115e-07
201572_x_at	DCTD	dCMP deaminase	1635	-1.26829	-1.49578	-1.43573	-1.1959	-1.25908	-1.30176	-1.58304	7.78666	12.0621	1.54308e-06	2.87702e-06
201573_s_at	ETF1	eukaryotic translation termination factor 1	2107	-1.12655	-1.63935	-1.78861	-2.37759	-2.69384	-3.20901	-3.68979	9.25874	122.873	2.43647e-17	3.95865e-16
201574_at	ETF1	eukaryotic translation termination factor 1	2107	1.0732	-1.29681	-1.34655	-1.35358	-1.369	-1.65291	-1.65646	10.5141	32.6817	7.83443e-11	2.8461e-10
201576_s_at	GLB1	galactosidase, beta 1	2720	-1.01876	1.16275	1.29487	1.25788	1.00584	1.02301	-1.16079	8.99954	14.6493	2.61336e-07	5.35962e-07
201577_at	NME1	non-metastatic cells 1, protein (NM23A) expressed in	4830	-1.26679	-1.51484	-1.44082	-1.66652	-1.72965	-1.80142	-1.83206	11.4759	38.0994	1.49024e-11	6.19187e-11
201578_at	PODXL	podocalyxin-like	5420	1.24839	-1.66273	-1.57408	-1.34308	-2.09514	-1.45813	-3.10315	11.1749	150.432	2.26099e-18	4.94765e-17
201579_at	FAT1	FAT tumor suppressor homolog 1 (Drosophila)	2195	1.95819	1.61642	1.54851	1.13744	1.54926	1.26648	1.09867	10.0335	54.8253	2.63378e-13	1.58829e-12
201580_s_at	TMX4	thioredoxin-related transmembrane protein 4	56255	-1.08995	-1.10684	-1.04454	1.00579	1.00581	1.03335	1.2621	8.20312	10.0293	7.64395e-06	1.3119e-05
201581_at	TMX4	thioredoxin-related transmembrane protein 4	56255	1.17342	1.32768	1.25876	1.83954	2.24583	2.17631	2.67287	8.25011	92.6385	6.54782e-16	7.24675e-15
201582_at	SEC23B	Sec23 homolog B (S. cerevisiae)	10483	-1.05944	-1.11714	-1.27995	-1.28598	-1.18586	-1.28016	1.03904	6.87792	9.66063	1.04606e-05	1.76437e-05
201583_s_at	SEC23B	Sec23 homolog B (S. cerevisiae)	10483	-1.15913	-1.35183	-1.30248	-1.33067	-1.45377	-1.68245	-1.28705	8.58961	25.706	9.90952e-10	2.95837e-09
201584_s_at	DDX39	DEAD (Asp-Glu-Ala-Asp) box polypeptide 39	10212	1.44973	1.19351	1.18388	1.00972	1.1326	-1.20803	1.00417	10.3047	18.3039	3.0828e-08	7.22785e-08
201585_s_at	SFPQ	splicing factor proline/glutamine-rich (polypyrimidine tract binding protein associated)	6421	1.84668	1.41314	1.64698	1.6522	1.87041	1.31272	1.58337	10.5633	44.1779	2.93099e-12	1.40202e-11
201586_s_at	SFPQ	splicing factor proline/glutamine-rich (polypyrimidine tract binding protein associated)	6421	1.84545	1.30038	1.3511	1.3291	1.53771	1.02455	1.02956	11.359	32.7065	7.77097e-11	2.82542e-10
201587_s_at	IRAK1	interleukin-1 receptor-associated kinase 1	3654	1.47574	-1.02039	1.05716	1.318	1.25821	1.21159	-1.12127	7.62672	20.5623	9.71041e-09	2.45851e-08
201589_at	SMC1A	structural maintenance of chromosomes 1A	8243	1.7139	1.30065	1.21032	1.45191	1.68159	1.18147	-1.00598	9.54302	20.9024	8.23482e-09	2.1063e-08
201590_x_at	ANXA2	annexin A2	302	-4.63241	-3.39821	-2.60691	-2.1712	-3.02097	-2.23155	-3.31092	12.2062	284.754	1.16431e-21	6.87736e-20
201591_s_at	NISCH	nischarin	11188	1.52467	1.39481	1.59257	1.7821	1.89746	1.78937	1.8201	10.0269	50.673	6.37265e-13	3.50699e-12
201593_s_at	ZC3H15	zinc finger CCCH-type containing 15	55854	1.12966	1.25721	1.26321	1.06796	-1.07992	-1.28838	-1.00931	10.7417	16.5081	8.41086e-08	1.8513e-07
201594_s_at	PPP4R1	protein phosphatase 4, regulatory subunit 1	9989	-1.18422	-1.30892	-1.29096	-1.20857	-1.10349	-1.48618	-1.33467	10.1636	9.94107	8.23417e-06	1.4078e-05
201595_s_at	ZC3H15	zinc finger CCCH-type containing 15	55854	1.01187	1.05045	1.00316	-1.16699	-1.22723	-1.49011	-1.26542	9.93542	14.9857	2.11183e-07	4.38797e-07
201596_x_at	KRT18	keratin 18	3875	-1.056	1.22506	1.67703	1.31618	-1.19133	1.01052	-1.83996	11.6962	98.3607	3.26656e-16	3.90167e-15
201597_at	COX7A2	cytochrome c oxidase subunit VIIa polypeptide 2 (liver)	1347	-1.50119	-1.33885	-1.41919	-1.42327	-1.61253	-1.46715	-1.28537	11.9335	21.1833	7.19821e-09	1.86024e-08
201598_s_at	INPPL1	inositol polyphosphate phosphatase-like 1	3636	1.43619	1.2112	1.4964	1.60862	1.62259	1.4066	1.22511	7.30727	12.1237	1.47464e-06	2.75616e-06
201599_at	OAT	ornithine aminotransferase (gyrate atrophy)	4942	-1.49026	-1.9346	-1.99075	-2.1246	-2.41481	-2.43162	-2.10261	10.445	41.2798	6.19367e-12	2.7672e-11
201600_at	PHB2	prohibitin 2	11331	1.01624	-1.28187	-1.44821	-1.2545	-1.30736	-1.30283	-1.3855	11.103	14.7518	2.44819e-07	5.04201e-07
201601_x_at	IFITM1	interferon induced transmembrane protein 1 (9-27)	8519	-1.00624	-1.00739	-1.00299	-1.98996	-2.08821	-1.68386	-8.14769	11.0676	445.038	5.56522e-24	7.28847e-22
201602_s_at	PPP1R12A	protein phosphatase 1, regulatory (inhibitor) subunit 12A	4659	-1.05621	-1.18571	-1.39078	-1.13824	-1.32623	-1.54049	-1.48048	8.19836	10.02	7.70416e-06	1.32162e-05
201603_at	PPP1R12A	protein phosphatase 1, regulatory (inhibitor) subunit 12A	4659	1.15642	1.022	1.05824	1.18218	1.12541	-1.06242	-1.1697	9.63015	6.76908	0.00016806	0.000249797
201604_s_at	PPP1R12A	protein phosphatase 1, regulatory (inhibitor) subunit 12A	4659	1.16263	-1.02726	1.00113	1.05181	1.05052	-1.16547	-1.3632	8.06174	9.80588	9.23581e-06	1.56881e-05
201605_x_at	CNN2	calponin 2	1265	-1.09717	-1.6122	-1.49847	-1.641	-1.75047	-1.6807	-2.00799	8.87296	42.4421	4.56269e-12	2.09296e-11
201606_s_at	PWP1	PWP1 homolog (S. cerevisiae)	11137	-1.16501	-1.42593	-1.43844	-1.50797	-1.72172	-1.84073	-1.76356	10.16	26.0487	8.63365e-10	2.60385e-09
201607_at	PWP1	PWP1 homolog (S. cerevisiae)	11137	-1.25246	-1.61689	-1.67503	-1.62098	-1.68469	-1.79516	-1.38917	8.51298	26.4458	7.37302e-10	2.24744e-09
201608_s_at	PWP1	PWP1 homolog (S. cerevisiae)	11137	-1.27466	-1.51214	-1.58327	-1.67399	-1.84911	-2.00765	-1.96369	9.65207	53.5218	3.45189e-13	2.0233e-12
201609_x_at	ICMT	isoprenylcysteine carboxyl methyltransferase	23463	-1.01851	-1.40774	-1.37161	-1.56717	-1.70815	-2.07825	-2.24075	8.71567	44.8705	2.46738e-12	1.19838e-11
201611_s_at	ICMT	isoprenylcysteine carboxyl methyltransferase	23463	1.13453	-1.11266	-1.13482	-1.33825	-1.36492	-2.03981	-1.79062	8.12934	36.9249	2.09582e-11	8.46127e-11
201612_at	ALDH9A1	aldehyde dehydrogenase 9 family, member A1	223	1.08885	-1.00892	-1.11601	-1.0247	-1.22669	-1.13181	-1.27493	10.1942	9.84663	8.92072e-06	1.51847e-05
201613_s_at	AP1G2	adaptor-related protein complex 1, gamma 2 subunit	8906	1.07357	1.04347	1.05427	-1.08143	-1.16352	-1.08588	-1.26439	7.12882	6.48724	0.00022824	0.0003347
201614_s_at	RUVBL1	RuvB-like 1 (E. coli)	8607	-1.17921	-1.44467	-1.44969	-1.71416	-1.71347	-2.16228	-2.0166	9.6857	31.0499	1.35501e-10	4.71443e-10
201615_x_at	CALD1	caldesmon 1	800	-2.07879	-2.40538	-1.95233	-1.51549	-2.03478	-2.2056	-3.57861	9.30004	43.2809	3.67676e-12	1.72627e-11
201616_s_at	CALD1	caldesmon 1	800	-3.17038	-2.80275	-2.5528	-1.78681	-2.99904	-2.75387	-4.26786	8.72916	73.5033	9.42362e-15	7.81714e-14
201617_x_at	CALD1	caldesmon 1	800	-2.73064	-3.05887	-2.51481	-1.91849	-2.76871	-3.29807	-5.54777	8.47403	62.7861	5.6884e-14	3.95989e-13
201619_at	PRDX3	peroxiredoxin 3	10935	-1.24352	-1.27012	-1.44888	-1.48312	-1.61322	-1.63422	-1.65566	11.1146	22.1453	4.59133e-09	1.22601e-08
201620_at	MBTPS1	membrane-bound transcription factor peptidase, site 1	8720	1.10726	-1.02692	1.04468	1.34842	1.37777	1.36192	1.40888	8.37947	15.0645	2.01007e-07	4.18828e-07
201622_at	SND1	staphylococcal nuclease and tudor domain containing 1	27044	1.15404	-1.13282	-1.12609	1.19276	1.02085	1.22223	1.03628	8.21731	12.3528	1.24735e-06	2.34946e-06
201624_at	DARS	aspartyl-tRNA synthetase	1615	1.01326	-1.00947	-1.23517	-1.21056	-1.23367	-1.07404	-1.45385	9.5092	9.07236	1.75504e-05	2.89264e-05
201625_s_at	INSIG1	insulin induced gene 1	3638	-1.09093	-1.39847	-1.56419	-1.39005	-1.57147	-1.08311	-1.09258	6.92813	12.1073	1.49257e-06	2.78726e-06
201626_at	INSIG1	insulin induced gene 1	3638	-1.12523	-1.38768	-1.72463	-1.27619	-1.03246	1.26027	1.18086	9.02923	26.2708	7.90208e-10	2.39884e-09
201627_s_at	INSIG1	insulin induced gene 1	3638	-1.13855	-1.42188	-1.59539	-1.31408	-1.2461	1.06718	-1.02277	7.75024	21.9869	4.93862e-09	1.31132e-08
201628_s_at	RRAGA	Ras-related GTP binding A	10670	-1.24208	-1.48208	-1.33041	-1.13145	-1.05433	-1.06684	1.14981	9.85363	18.4923	2.78762e-08	6.57754e-08
201629_s_at	ACP1	acid phosphatase 1, soluble	52	-1.2237	-1.40089	-1.3415	-1.47043	-1.53405	-1.80342	-1.66297	9.77968	11.918	1.71717e-06	3.18171e-06
201631_s_at	IER3	immediate early response 3	8870	-1.77754	-2.32168	-1.83657	-2.35467	-2.67365	-2.17677	-4.09057	8.91909	128.869	1.39401e-17	2.42443e-16
201632_at	EIF2B1	eukaryotic translation initiation factor 2B, subunit 1 alpha, 26kDa	1967	1.1313	-1.11312	-1.05877	1.02722	1.04862	-1.14107	-1.18216	8.79522	7.64225	6.80237e-05	0.00010534
201633_s_at	CYB5B	cytochrome b5 type B (outer mitochondrial membrane)	80777	-1.28536	-1.31509	-1.4833	-1.3066	-1.38808	-1.46049	-1.50872	8.45004	13.2869	6.44744e-07	1.25791e-06
201634_s_at	CYB5B	cytochrome b5 type B (outer mitochondrial membrane)	80777	-1.23857	-1.38565	-1.65106	-1.4074	-1.45848	-1.58042	-1.59999	9.04883	10.9054	3.73891e-06	6.63839e-06
201635_s_at	FXR1	fragile X mental retardation, autosomal homolog 1	8087	-1.12632	-1.06206	1.15452	-1.094	-1.29491	-1.78788	-2.2292	9.93427	31.7191	1.07911e-10	3.81804e-10
201636_at	FXR1	fragile X mental retardation, autosomal homolog 1	8087	-1.12661	1.02022	1.0352	-1.18068	-1.3417	-1.62228	-1.5559	10.1252	31.6202	1.11572e-10	3.93842e-10
201637_s_at	FXR1	fragile X mental retardation, autosomal homolog 1	8087	-1.28571	-1.10826	-1.08254	-1.16386	-1.43635	-1.51878	-2.07027	10.6548	32.1465	9.35124e-11	3.35297e-10
201639_s_at	CPSF1	cleavage and polyadenylation specific factor 1, 160kDa	29894	1.71641	1.26642	1.6183	1.91253	1.96757	1.65841	1.43606	8.11796	16.3535	9.20689e-08	2.01455e-07
201641_at	BST2	bone marrow stromal cell antigen 2	684	2.24209	2.00034	1.65825	2.7078	1.26248	2.20858	1.4446	6.88852	69.7554	1.71509e-14	1.33958e-13
201642_at	IFNGR2	interferon gamma receptor 2 (interferon gamma transducer 1)	3460	-1.31421	-1.29501	-1.20101	-1.08002	-1.15341	-1.07113	-1.22876	8.7673	11.2437	2.86716e-06	5.16666e-06
201643_x_at	KDM3B	lysine (K)-specific demethylase 3B	51780	1.44866	1.21259	1.32495	1.34424	1.52967	1.37266	1.19898	10.0407	15.3693	1.66358e-07	3.50917e-07
201644_at	TSTA3	tissue specific transplantation antigen P35B	7264	1.06901	-1.19429	-1.22874	-1.29788	-1.53449	-1.56157	-1.54774	8.30061	21.2405	7.00503e-09	1.81357e-08
201645_at	TNC	tenascin C	3371	-1.47892	1.14077	1.5156	1.45366	1.1126	-1.3496	-3.06245	8.48351	168.425	5.96152e-19	1.51758e-17
201646_at	SCARB2	scavenger receptor class B, member 2	950	1.07305	1.00261	1.19474	1.57238	1.49176	1.45529	1.49339	6.92197	11.3623	2.61597e-06	4.73309e-06
201648_at	JAK1	Janus kinase 1	3716	-1.76611	-2.43697	-1.7601	-1.0566	1.0844	1.13037	1.21296	8.09057	158.737	1.1999e-18	2.84671e-17
201649_at	UBE2L6	ubiquitin-conjugating enzyme E2L 6	9246	1.02497	-1.04955	-1.10822	1.04596	-1.00227	1.02192	1.27228	8.64195	8.41264	3.22013e-05	5.15407e-05
201650_at	KRT19	keratin 19	3880	1.13779	2.12747	2.78997	3.60828	1.66832	3.64458	1.16774	10.2793	174.851	3.82928e-19	1.03542e-17
201651_s_at	PACSIN2	protein kinase C and casein kinase substrate in neurons 2	11252	1.16541	-1.05905	-1.0224	1.05983	-1.08161	-1.23496	-1.35765	9.32763	12.8789	8.56414e-07	1.64489e-06
201652_at	COPS5	COP9 constitutive photomorphogenic homolog subunit 5 (Arabidopsis)	10987	-1.32288	-1.37737	-1.33108	-1.38663	-1.49333	-1.67589	-1.43541	10.391	16.2843	9.58875e-08	2.09143e-07
201653_at	CNIH	cornichon homolog (Drosophila)	10175	-1.51881	-1.47419	-1.46548	-1.1653	-1.41641	-1.234	-1.23311	10.9485	19.2605	1.86474e-08	4.52207e-08
201656_at	ITGA6	integrin, alpha 6	3655	1.51832	-1.15662	-1.7865	-1.59181	-1.96935	-1.17011	-1.15445	9.47667	55.2193	2.42987e-13	1.47493e-12
201657_at	ARL1	ADP-ribosylation factor-like 1	400	-1.41577	-1.43643	-1.66777	-1.47284	-1.99819	-1.91158	-1.70124	7.96331	14.4439	2.98213e-07	6.06936e-07
201658_at	ARL1	ADP-ribosylation factor-like 1	400	-1.1443	-1.05783	1.01118	1.26629	1.14271	1.22765	1.42623	9.09791	27.103	5.70355e-10	1.77103e-09
201659_s_at	ARL1	ADP-ribosylation factor-like 1	400	-1.78814	-1.70871	-1.51631	-1.58665	-2.07296	-1.96452	-1.76231	8.9121	39.2905	1.06464e-11	4.5347e-11
201660_at	ACSL3	Acyl-CoA synthetase long-chain family member 3	2181	-1.26502	-1.34706	-1.35203	-1.48225	-1.29401	-1.47341	-1.07464	8.75425	15.5429	1.49557e-07	3.17647e-07
201662_s_at	ACSL3	acyl-CoA synthetase long-chain family member 3	2181	-1.22734	-1.84972	-1.68543	-1.74173	-1.59131	-1.80699	-1.81259	8.54752	23.6612	2.33421e-09	6.54645e-09
201663_s_at	SMC4	structural maintenance of chromosomes 4	10051	1.50914	1.62124	1.71094	1.53547	1.80918	1.1884	1.04784	8.92706	20.3302	1.08808e-08	2.73482e-08
201664_at	SMC4	structural maintenance of chromosomes 4	10051	1.77309	1.81258	1.85038	1.78222	1.97253	1.3622	1.19385	10.4146	40.4475	7.74641e-12	3.39483e-11
201665_x_at	RPS17	ribosomal protein S17	6218	-1.16181	-1.06253	-1.07478	-1.14616	-1.21113	-1.19388	-1.18173	14.1061	6.00768	0.000390869	0.000560723
201666_at	TIMP1	TIMP metallopeptidase inhibitor 1	7076	-1.3682	-1.8247	-1.47453	1.00478	-1.18359	1.37871	1.20142	9.13222	49.7407	7.84267e-13	4.23035e-12
201667_at	GJA1	gap junction protein, alpha 1, 43kDa	2697	1.11489	-1.01704	-1.03792	-1.26612	-1.5861	-1.60024	-3.11934	13.0826	147.909	2.75963e-18	5.86557e-17
201668_x_at	MARCKS	myristoylated alanine-rich protein kinase C substrate	4082	1.17498	1.17725	1.4989	1.78099	2.46407	1.85189	2.09221	8.00793	48.4848	1.04326e-12	5.47182e-12
201669_s_at	MARCKS	myristoylated alanine-rich protein kinase C substrate	4082	1.52314	1.57103	1.62174	2.28859	2.95875	2.54658	3.13443	12.1905	125.4	1.91954e-17	3.21832e-16
201670_s_at	MARCKS	myristoylated alanine-rich protein kinase C substrate	4082	1.70789	1.79681	1.82369	3.1479	4.07102	3.4778	4.2513	10.0029	104.061	1.69646e-16	2.18969e-15
201671_x_at	USP14	ubiquitin specific peptidase 14 (tRNA-guanine transglycosylase)	9097	1.28607	-1.08014	-1.01656	-1.03554	1.04974	-1.11836	-1.26468	8.89201	20.9291	8.12948e-09	2.08141e-08
201672_s_at	USP14	ubiquitin specific peptidase 14 (tRNA-guanine transglycosylase)	9097	1.16305	-1.08194	-1.07401	-1.13414	-1.12333	-1.47626	-1.33835	10.4798	24.3104	1.76662e-09	5.05856e-09
201673_s_at	GYS1	glycogen synthase 1 (muscle)	2997	1.28408	1.02335	1.09656	1.17635	1.14428	1.31635	1.15281	7.36788	6.45017	0.000237746	0.000347991
201674_s_at	AKAP1	A kinase (PRKA) anchor protein 1	8165	1.06725	-1.33121	-1.38542	-1.52342	-1.61033	-1.65423	-1.68165	8.41274	67.7421	2.396e-14	1.81349e-13
201675_at	AKAP1	A kinase (PRKA) anchor protein 1	8165	1.20044	-1.56841	-1.87234	-1.95881	-2.19005	-2.47171	-2.22485	8.20485	108.842	1.00511e-16	1.38636e-15
201676_x_at	PSMA1	proteasome (prosome, macropain) subunit, alpha type, 1	5682	-1.261	-1.34304	-1.29611	-1.40522	-1.49459	-1.55658	-1.51038	12.0494	18.5861	2.65212e-08	6.27942e-08
201678_s_at	C3orf37	chromosome 3 open reading frame 37	56941	1.09796	-1.02339	-1.01252	-1.0385	-1.11604	-1.14797	-1.18995	7.93427	5.69922	0.000559168	0.000788803
201680_x_at	SRRT	serrate RNA effector molecule homolog (Arabidopsis)	51593	1.93228	1.40723	1.47209	1.51379	1.82831	1.24095	1.36111	8.99998	47.5531	1.29493e-12	6.66381e-12
201681_s_at	DLG5	discs, large homolog 5 (Drosophila)	9231	1.55546	1.02278	1.32291	1.39235	1.75749	1.41626	1.31932	9.57981	29.2697	2.53727e-10	8.38674e-10
201682_at	PMPCB	peptidase (mitochondrial processing) beta	9512	1.02791	-1.09148	-1.09509	-1.04067	-1.12966	-1.00173	-1.31174	10.2232	11.9703	1.65166e-06	3.06668e-06
201685_s_at	TOX4	TOX high mobility group box family member 4	9878	1.17756	-1.16636	1.0825	1.51408	1.56904	1.44931	1.48293	7.16477	12.5264	1.10036e-06	2.08609e-06
201687_s_at	API5	apoptosis inhibitor 5	8539	1.05971	-1.04401	-1.12477	-1.3064	-1.13598	-1.64928	-1.37313	10.1145	15.77	1.30294e-07	2.78997e-07
201688_s_at	TPD52	tumor protein D52	7163	1.08077	-1.5658	-1.71828	-2.48134	-2.70808	-3.10266	-3.15752	7.04916	93.4203	5.94017e-16	6.64228e-15
201689_s_at	TPD52	tumor protein D52	7163	1.15912	-1.72895	-2.44056	-2.9919	-3.22026	-4.03262	-3.88546	7.43679	106.47	1.29946e-16	1.73246e-15
201690_s_at	TPD52	tumor protein D52	7163	1.24733	-1.40394	-1.82023	-2.15328	-2.02663	-2.31873	-2.18903	8.87322	119.581	3.34851e-17	5.27523e-16
201692_at	SIGMAR1	sigma non-opioid intracellular receptor 1	10280	1.2528	-1.0722	-1.05863	1.05699	-1.01203	-1.00771	1.07139	7.25414	8.48576	3.00622e-05	4.83168e-05
201694_s_at	EGR1	early growth response 1	1958	1.74033	-1.19516	1.05504	1.40806	1.1755	-1.1458	-1.3368	7.62937	33.2636	6.48193e-11	2.39128e-10
201695_s_at	NP	nucleoside phosphorylase	4860	-1.9634	-2.35423	-2.75297	-4.26519	-5.30836	-5.95368	-6.75851	8.88443	245.253	6.90437e-21	3.18006e-19
201696_at	SFRS4	splicing factor, arginine/serine-rich 4	6429	1.30577	1.13657	1.3101	1.37898	1.54776	1.33562	1.28882	9.85224	19.9221	1.3326e-08	3.30171e-08
201697_s_at	DNMT1	DNA (cytosine-5-)-methyltransferase 1	1786	1.88775	1.26568	1.39495	1.41132	1.62425	1.23996	1.07487	9.7098	39.6872	9.53769e-12	4.09745e-11
201698_s_at	SFRS9	splicing factor, arginine/serine-rich 9	8683	1.312	-1.14142	-1.02183	1.01814	1.09206	1.02406	-1.09301	10.8687	16.0409	1.10757e-07	2.39177e-07
201699_at	PSMC6	proteasome (prosome, macropain) 26S subunit, ATPase, 6	5706	-1.12463	1.01632	-1.09463	-1.14441	-1.2522	-1.31785	-1.22257	11.1094	9.14694	1.64163e-05	2.71503e-05
201701_s_at	PGRMC2	progesterone receptor membrane component 2	10424	1.27156	-1.24053	-1.47731	-1.02562	-1.17731	-1.00677	-1.49491	8.27146	9.42689	1.28156e-05	2.14152e-05
201703_s_at	PPP1R10	protein phosphatase 1, regulatory (inhibitor) subunit 10	5514	1.49096	1.3563	1.36592	1.48452	1.60001	1.45192	1.629	8.0391	23.5156	2.48687e-09	6.94006e-09
201705_at	PSMD7	proteasome (prosome, macropain) 26S subunit, non-ATPase, 7	5713	-1.14688	-1.21789	-1.33419	-1.36575	-1.3777	-1.52788	-1.35197	10.1542	16.3666	9.13608e-08	1.9999e-07
201706_s_at	PEX19	peroxisomal biogenesis factor 19	5824	-1.09311	-1.1147	-1.15389	-1.3067	-1.29505	-1.41302	-1.47983	8.37763	10.309	6.05628e-06	1.05117e-05
201707_at	PEX19	peroxisomal biogenesis factor 19	5824	-1.25792	-1.4203	-1.40095	-1.22118	-1.33493	-1.38844	-1.43215	8.42594	14.9005	2.22818e-07	4.61788e-07
201708_s_at	NIPSNAP1	nipsnap homolog 1 (C. elegans)	8508	1.0227	-1.11174	-1.028	-1.093	-1.17876	-1.17413	-1.37266	8.77423	6.51469	0.000221466	0.000325171
201710_at	MYBL2	v-myb myeloblastosis viral oncogene homolog (avian)-like 2	4605	1.13286	-1.23086	-1.18883	-1.3452	-1.45424	-1.38925	-1.63671	7.44217	23.405	2.6101e-09	7.26052e-09
201711_x_at	RANBP2	RAN binding protein 2	5903	1.01756	1.32261	1.56563	1.14463	1.22208	-1.16659	-1.23723	8.8123	14.1039	3.72197e-07	7.48581e-07
201712_s_at	RANBP2	RAN binding protein 2	5903	1.3471	1.32252	1.25667	1.17434	1.14185	-1.2224	1.05036	8.57408	20.9085	8.21052e-09	2.10071e-08
201713_s_at	RANBP2	RAN binding protein 2	5903	1.21415	1.30983	1.2293	1.08069	1.10762	-1.40407	-1.20535	10.0307	17.7101	4.25767e-08	9.78079e-08
201714_at	TUBG1	tubulin, gamma 1	7283	1.01158	-1.36065	-1.38286	-1.18999	-1.29574	-1.58444	-1.61422	8.93967	26.3789	7.57064e-10	2.30443e-09
201715_s_at	ACIN1	apoptotic chromatin condensation inducer 1	22985	1.78388	1.3443	1.54683	1.60103	1.63442	1.18938	1.24618	7.41546	23.7327	2.26289e-09	6.3588e-09
201717_at	MRPL49	mitochondrial ribosomal protein L49	740	1.07127	-1.24383	-1.24903	-1.23389	-1.2572	-1.17925	-1.20046	9.24544	15.3939	1.63859e-07	3.46064e-07
201718_s_at	EPB41L2	erythrocyte membrane protein band 4.1-like 2	2037	-1.11077	-1.26087	-1.14077	-1.17601	-1.25761	-1.47094	-2.01721	7.31083	20.7138	9.02027e-09	2.29453e-08
201719_s_at	EPB41L2	erythrocyte membrane protein band 4.1-like 2	2037	-1.12546	-1.25237	-1.23163	-1.13771	-1.11886	-1.38477	-2.1324	8.75043	22.456	3.98447e-09	1.07525e-08
201723_s_at	GALNT1	UDP-N-acetyl-alpha-D-galactosamine:polypeptide N-acetylgalactosaminyltransferase 1 (GalNAc-T1)	2589	-1.18832	-1.10984	1.01559	-1.02102	-1.25226	-1.18255	-1.06044	9.93385	6.57339	0.000207694	0.000305677
201724_s_at	GALNT1	UDP-N-acetyl-alpha-D-galactosamine:polypeptide N-acetylgalactosaminyltransferase 1 (GalNAc-T1)	2589	-1.2655	-1.36763	-1.35726	-1.31727	-1.53885	-1.44932	-1.42049	9.34274	11.6101	2.16444e-06	3.95729e-06
201725_at	CDC123	cell division cycle 123 homolog (S. cerevisiae)	8872	-1.20004	-1.4252	-1.52622	-1.7974	-1.89088	-2.18278	-2.1563	10.2873	65.4626	3.53895e-14	2.57343e-13
201726_at	ELAVL1	ELAV (embryonic lethal, abnormal vision, Drosophila)-like 1 (Hu antigen R)	1994	1.51774	1.01521	1.24267	1.15809	1.35577	1.11353	-1.02049	11.2417	24.9927	1.32709e-09	3.88536e-09
201727_s_at	ELAVL1	ELAV (embryonic lethal, abnormal vision, Drosophila)-like 1 (Hu antigen R)	1994	1.03427	-1.66917	-1.40355	-1.19928	-1.26345	-1.3549	-1.82041	7.75051	21.0064	7.83335e-09	2.01315e-08
201728_s_at	KIAA0100	KIAA0100	9703	1.10666	1.03702	1.04656	-1.05501	-1.03621	-1.13389	-1.22112	7.47436	9.63302	1.07127e-05	1.8056e-05
201729_s_at	KIAA0100	KIAA0100	9703	1.4595	1.28671	1.40307	1.49427	1.46347	1.25219	1.23664	8.29324	12.5428	1.08752e-06	2.06325e-06
201730_s_at	TPR	translocated promoter region (to activated MET oncogene)	7175	1.56088	1.92669	2.10557	1.76688	2.11395	1.39047	1.35701	9.84046	23.567	2.4318e-09	6.79807e-09
201731_s_at	TPR	translocated promoter region (to activated MET oncogene)	7175	1.49263	1.54232	1.66857	1.62071	1.69824	1.32373	1.28823	9.92838	24.123	1.91332e-09	5.44912e-09
201732_s_at	CLCN3	chloride channel 3	1182	-1.30286	-1.30908	-1.00664	-1.11618	-1.0604	-1.43232	-1.25346	7.58074	8.46543	3.06413e-05	4.91774e-05
201734_at	CLCN3	Chloride channel 3	1182	-1.14676	-1.08085	-1.05487	1.28287	1.55753	1.18117	1.69321	9.2638	62.9003	5.57218e-14	3.88629e-13
201735_s_at	CLCN3	chloride channel 3	1182	-1.42079	-1.27427	-1.1599	-1.28278	-1.30393	-1.54059	-1.30789	9.23879	12.6203	1.02882e-06	1.95848e-06
201736_s_at	40608	membrane-associated ring finger (C3HC4) 6	10299	1.09425	1.05205	1.05279	1.11127	1.20011	1.0102	-1.11425	8.29217	7.12411	0.000115448	0.000174295
201737_s_at	40608	membrane-associated ring finger (C3HC4) 6	10299	1.13697	1.65855	1.4033	2.06728	2.8298	2.23923	2.56393	8.72879	45.7168	2.00583e-12	9.92052e-12
201738_at	EIF1B	eukaryotic translation initiation factor 1B	10289	1.18109	-1.02736	-1.0652	1.13632	1.29131	1.22243	1.36288	11.664	10.157	6.8698e-06	1.18579e-05
201739_at	SGK1	serum/glucocorticoid regulated kinase 1	6446	-1.49413	-1.90977	-1.90468	-2.97417	-2.48406	-2.82557	-1.93029	7.40885	134.877	8.16546e-18	1.5277e-16
201740_at	NDUFS3	NADH dehydrogenase (ubiquinone) Fe-S protein 3, 30kDa (NADH-coenzyme Q reductase)	4722	-1.17181	-1.32574	-1.23457	-1.28733	-1.31699	-1.38683	-1.26217	9.90488	8.93884	1.97976e-05	3.24324e-05
201742_x_at	SFRS1	splicing factor, arginine/serine-rich 1	6426	1.45195	1.23178	1.39358	1.19799	1.22825	-1.12406	-1.27257	8.87011	20.4287	1.03665e-08	2.61416e-08
201744_s_at	LUM	lumican	4060	-1.5935	5.47954	10.5828	23.2001	15.5188	24.7534	18.7592	10.9842	443.771	5.75878e-24	7.50407e-22
201745_at	TWF1	twinfilin, actin-binding protein, homolog 1 (Drosophila)	5756	-1.29521	-1.24703	-1.22298	1.18628	1.21182	1.18025	1.39492	9.27752	13.5994	5.21011e-07	1.02811e-06
201746_at	TP53	tumor protein p53	7157	1.39562	-1.414	-1.23012	-1.40715	-1.30312	-1.33915	-1.6696	7.23224	19.3079	1.8198e-08	4.42177e-08
201747_s_at	SAFB	scaffold attachment factor B	6294	1.45638	1.03863	1.20294	1.31124	1.21378	1.10732	1.04015	6.29968	5.71162	0.000551073	0.000778061
201748_s_at	SAFB	scaffold attachment factor B	6294	1.92403	1.42061	1.71741	1.92208	2.0865	1.82923	1.60898	8.2942	45.5471	2.09029e-12	1.0295e-11
201751_at	JOSD1	Josephin domain containing 1	9929	1.14417	1.14315	1.22475	1.5	1.57393	1.48133	1.61374	8.40789	35.743	2.98337e-11	1.16878e-10
201752_s_at	ADD3	adducin 3 (gamma)	120	-1.34839	1.06011	1.24	1.02018	-1.06812	-1.03299	-1.41438	9.76254	28.3732	3.52447e-10	1.13419e-09
201753_s_at	ADD3	adducin 3 (gamma)	120	-1.4115	-1.03319	1.05998	-1.09055	-1.16027	-1.13969	-1.43164	9.75351	11.8863	1.75821e-06	3.25472e-06
201754_at	COX6C	cytochrome c oxidase subunit VIc	1345	-1.49192	-1.2742	-1.2547	-1.29663	-1.42618	-1.42055	-1.22779	12.1292	19.7575	1.44752e-08	3.56938e-08
201755_at	MCM5	minichromosome maintenance complex component 5	4174	1.32329	-1.25491	-1.19714	-1.33975	-1.50985	-1.58226	-1.87562	7.47689	39.3471	1.04799e-11	4.46672e-11
201756_at	RPA2	replication protein A2, 32kDa	6118	1.0593	-1.11951	-1.19433	-1.25739	-1.32092	-1.64356	-1.33322	9.58283	31.104	1.33006e-10	4.63572e-10
201757_at	NDUFS5 /// RPL10	NADH dehydrogenase (ubiquinone) Fe-S protein 5, 15kDa (NADH-coenzyme Q reductase) /// ribosomal protein L10	4725 /// 6134	-1.40033	-1.36768	-1.42677	-1.63398	-1.87169	-1.95696	-1.82926	12.246	62.7775	5.69722e-14	3.9639e-13
201758_at	TSG101	tumor susceptibility gene 101	7251	-1.36988	-1.34628	-1.2601	-1.175	-1.22411	-1.20434	1.06052	10.2498	16.2306	9.89743e-08	2.15274e-07
201760_s_at	WSB2	WD repeat and SOCS box-containing 2	55884	-1.07874	-1.44133	-1.35991	1.02652	1.23354	1.1553	1.6841	9.69286	78.7121	4.29417e-15	3.85969e-14
201761_at	MTHFD2	methylenetetrahydrofolate dehydrogenase (NADP+ dependent) 2, methenyltetrahydrofolate cyclohydrolase	10797	-1.37533	-1.60348	-1.51353	-1.63986	-2.09354	-2.43015	-4.48609	10.9866	141.223	4.7563e-18	9.42213e-17
201762_s_at	PSME2	proteasome (prosome, macropain) activator subunit 2 (PA28 beta)	5721	1.00529	-1.10233	-1.17689	-1.22936	-1.31661	-1.30353	-1.56793	9.74853	18.1296	3.38628e-08	7.89512e-08
201763_s_at	DAXX	death-domain associated protein	1616	1.1246	-1.49923	-1.37571	-1.34153	-1.36513	-1.76601	-1.47796	7.80448	11.4151	2.51175e-06	4.55279e-06
201764_at	TMEM106C	transmembrane protein 106C	79022	-1.43738	1.1167	1.44006	1.58951	1.6857	1.43786	1.93607	9.62255	103.463	1.81413e-16	2.32883e-15
201767_s_at	ELAC2	elaC homolog 2 (E. coli)	60528	1.30327	-1.00389	1.04641	1.07496	1.00135	-1.11821	-1.11226	8.23525	8.07784	4.4327e-05	6.99856e-05
201768_s_at	CLINT1	clathrin interactor 1	9685	-1.00394	-1.07472	-1.05632	-1.06656	-1.18286	-1.07702	-1.31769	8.2426	6.96776	0.000136025	0.000203982
201769_at	CLINT1	clathrin interactor 1	9685	1.11609	-1.10283	-1.20984	-1.13781	-1.19659	-1.31623	-1.35247	10.0239	10.902	3.74901e-06	6.65541e-06
201770_at	SNRPA	small nuclear ribonucleoprotein polypeptide A	6626	1.44103	1.05349	1.05833	1.14892	1.20762	1.16829	-1.091	9.09155	9.708	1.00429e-05	1.69833e-05
201772_at	AZIN1	antizyme inhibitor 1	51582	-1.47885	-1.75777	-1.84735	-2.1738	-2.05954	-2.56564	-2.26378	9.66232	35.76	2.96802e-11	1.16355e-10
201773_at	ADNP	activity-dependent neuroprotector homeobox	23394	2.02164	1.76399	1.90295	1.82189	2.31165	1.61149	1.70802	9.95441	45.3167	2.21121e-12	1.08494e-11
201774_s_at	NCAPD2	non-SMC condensin I complex, subunit D2	9918	1.63859	1.11755	1.23671	1.31403	1.46325	1.22469	1.02022	8.10171	12.84	8.80242e-07	1.68778e-06
201776_s_at	KIAA0494	KIAA0494	9813	1.29562	-1.05061	-1.06724	-1.04921	-1.01516	-1.28757	-1.32733	6.63525	13.2491	6.61765e-07	1.28869e-06
201777_s_at	KIAA0494	KIAA0494	9813	-1.01999	-1.08897	-1.02721	-1.19771	-1.35427	-1.39955	-1.52225	7.00244	21.2289	7.04372e-09	1.82231e-08
201779_s_at	RNF13	ring finger protein 13	11342	-1.31824	-1.47713	-1.36748	-1.23059	-1.27135	-1.34539	-1.05124	9.23949	14.6339	2.63933e-07	5.40988e-07
201780_s_at	RNF13	ring finger protein 13	11342	-1.26472	-1.56664	-1.63366	-1.35361	-1.35145	-1.391	-1.07253	8.75293	15.1515	1.90381e-07	3.97837e-07
201781_s_at	AIP	aryl hydrocarbon receptor interacting protein	9049	-1.11206	-1.02043	1.00082	1.19001	1.06806	1.23821	1.35381	7.25011	13.3392	6.2203e-07	1.21524e-06
201782_s_at	AIP	aryl hydrocarbon receptor interacting protein	9049	-1.11965	-1.06258	-1.03047	1.0651	1.03978	1.30405	1.19451	8.31847	10.5544	4.9549e-06	8.67267e-06
201783_s_at	RELA	v-rel reticuloendotheliosis viral oncogene homolog A (avian)	5970	1.28191	1.05126	1.09751	1.29891	1.38062	1.69294	1.45426	7.26721	26.1415	8.31926e-10	2.51576e-09
201784_s_at	C11orf58	chromosome 11 open reading frame 58	10944	-1.14618	-1.15474	-1.20797	-1.23085	-1.27585	-1.40182	-1.45494	11.4479	7.55294	7.44022e-05	0.000114745
201786_s_at	ADAR	adenosine deaminase, RNA-specific	103	1.3634	-1.3054	-1.1867	-1.09962	-1.06939	-1.24552	-1.34322	9.48888	29.9379	1.99739e-10	6.72916e-10
201787_at	FBLN1 /// LOC100133843	fibulin 1 /// similar to Fibulin 1	100133843 /// 2192	1.07393	1.21314	1.44505	1.85732	1.43754	1.92959	1.37015	8.51508	31.3967	1.20354e-10	4.22428e-10
201788_at	DDX42	DEAD (Asp-Glu-Ala-Asp) box polypeptide 42	11325	1.48052	1.0371	1.00002	1.13621	1.21867	-1.0012	-1.0955	9.63872	25.8876	9.20992e-10	2.76447e-09
201790_s_at	DHCR7	7-dehydrocholesterol reductase	1717	1.18582	-1.15683	-1.22791	-1.16511	-1.11889	1.03561	1.04091	8.05918	8.37298	3.34295e-05	5.3434e-05
[truncated: 16,568 more rows]
[truncated: 2 more columns]

## Sheet: Table S2B
Intersect	Counts
D3	301
D6	629
D9	802
D12	1310
D15	1586
D18	1229
D21	1530
D3-D6	160
D3-D9	185
D3-D12	197
D3-D15	216
D3-D18	158
D3-D21	160
D6-D9	565
D6-D12	538
D6-D15	555
D6-D18	442
D6-D21	430
D9-D12	729
D9-D15	736
D9-D18	605
D9-D21	587
D12-D15	1153
D12-D18	999
D12-D21	981
D15-D18	1049
D15-D21	1169
D18-D21	1032
D3-D6-D9	152
D3-D6-D12	147
D3-D6-D15	147
D3-D6-D18	121
D3-D6-D21	120
D3-D9-D12	172
D3-D9-D15	177
D3-D9-D18	140
D3-D9-D21	141
D3-D12-D15	191
D3-D12-D18	151
D3-D12-D21	151
D3-D15-D18	155
D3-D15-D21	158
D3-D18-D21	145
D6-D9-D12	518
D6-D9-D15	525
D6-D9-D18	425
D6-D9-D21	415
D6-D12-D15	516
D6-D12-D18	433
D6-D12-D21	418
D6-D15-D18	432
D6-D15-D21	424
D6-D18-D21	385
D9-D12-D15	697
D9-D12-D18	599
D9-D12-D21	574
D9-D15-D18	593
D9-D15-D21	580
D9-D18-D21	537
D12-D15-D18	928
D12-D15-D21	931
D12-D18-D21	867
D15-D18-D21	931
D3-D6-D9-D12	145
D3-D6-D9-D15	145
D3-D6-D9-D18	119
D3-D6-D9-D21	119
D3-D6-D12-D15	143
D3-D6-D12-D18	120
D3-D6-D12-D21	119
D3-D6-D15-D18	120
D3-D6-D15-D21	119
D3-D6-D18-D21	112
D3-D9-D12-D15	169
D3-D9-D12-D18	138
D3-D9-D12-D21	138
D3-D9-D15-D18	140
D3-D9-D15-D21	140
D3-D9-D18-D21	130
D3-D12-D15-D18	149
D3-D12-D15-D21	150
D3-D12-D18-D21	139
D3-D15-D18-D21	145
D6-D9-D12-D15	501
D6-D9-D12-D18	421
D6-D9-D12-D21	406
D6-D9-D15-D18	419
D6-D9-D15-D21	411
D6-D9-D18-D21	376
D6-D12-D15-D18	424
D6-D12-D15-D21	414
D6-D12-D18-D21	380
D6-D15-D18-D21	382
D9-D12-D15-D18	587
D9-D12-D15-D21	568
D9-D12-D18-D21	531
D9-D15-D18-D21	532
D12-D15-D18-D21	828
D3-D6-D9-D12-D15	142
D3-D6-D9-D12-D18	118
D3-D6-D9-D12-D21	118
D3-D6-D9-D15-D18	119
D3-D6-D9-D15-D21	118
D3-D6-D9-D18-D21	111
D3-D6-D12-D15-D18	119
D3-D6-D12-D15-D21	118
D3-D6-D12-D18-D21	111
D3-D6-D15-D18-D21	112
D3-D9-D12-D15-D18	138
D3-D9-D12-D15-D21	137
D3-D9-D12-D18-D21	128
D3-D9-D15-D18-D21	130
D3-D12-D15-D18-D21	139
D6-D9-D12-D15-D18	415
D6-D9-D12-D15-D21	403
D6-D9-D12-D18-D21	372
D6-D9-D15-D18-D21	374
D6-D12-D15-D18-D21	377
D9-D12-D15-D18-D21	526
D3-D6-D9-D12-D15-D18	118
D3-D6-D9-D12-D15-D21	117
D3-D6-D9-D12-D18-D21	110
D3-D6-D9-D15-D18-D21	111
D3-D6-D12-D15-D18-D21	111
D3-D9-D12-D15-D18-D21	128
D6-D9-D12-D15-D18-D21	370
D3-D6-D9-D12-D15-D18-D21	110

## Sheet: Table S2C_Day03-Day00
Probe ID	Gene Symbol	Gene Title	Entrez Gene ID	Linear Fold change	AveExpr	t	P.Value	adj.P.Val	B
231628_s_at	---	---	---	15.2031	7.07243	29.3639	1.91266e-20	1.0782e-17	36.8395
231120_x_at	PKIB	protein kinase (cAMP-dependent, catalytic) inhibitor beta	5570	7.79336	6.91751	26.5942	1.96449e-19	7.71837e-17	34.5584
203447_at	PSMD5	proteasome (prosome, macropain) 26S subunit, non-ATPase, 5	5711	5.74273	7.17528	31.856	2.79179e-21	2.12924e-18	38.7036
1559410_at	---	---	---	5.63636	7.46287	21.4169	3.01987e-17	6.52569e-15	29.5541
224215_s_at	DLL1	delta-like 1 (Drosophila)	28514	5.53069	8.12303	28.4247	4.1134e-20	1.97527e-17	36.0924
241981_at	FAM20A	family with sequence similarity 20, member A	54757	5.47464	4.74496	23.7318	2.8057e-18	7.99501e-16	31.9265
209560_s_at	DLK1	delta-like 1 homolog (Drosophila)	8788	5.37788	10.5985	33.3973	9.11345e-22	8.75263e-19	39.7784
1558048_x_at	---	---	---	5.3592	5.50941	28.7928	3.03848e-20	1.64148e-17	36.3882
223551_at	PKIB	protein kinase (cAMP-dependent, catalytic) inhibitor beta	5570	5.0556	8.6184	26.1908	2.81033e-19	1.05615e-16	34.2056
235803_at	---	---	---	4.8648	7.70397	19.5299	2.50451e-16	3.66918e-14	27.4286
1562235_s_at	---	---	---	4.83099	7.40978	19.8719	1.68469e-16	2.63167e-14	27.8278
204653_at	TFAP2A	transcription factor AP-2 alpha (activating enhancer binding protein 2 alpha)	7020	4.40685	9.352	29.8341	1.315e-20	7.74984e-18	37.204
228658_at	MIAT	myocardial infarction associated transcript (non-protein coding)	440823	4.33447	8.98105	22.7363	7.58647e-18	1.87357e-15	30.9355
238774_at	---	---	---	4.29255	8.23382	21.9523	1.70849e-17	3.95561e-15	30.1244
206548_at	---	---	---	4.26134	6.02775	16.3872	1.31292e-14	1.10179e-12	23.4242
1569886_a_at	GLB1L3	galactosidase, beta 1-like 3	112937	4.19754	5.02812	19.1773	3.79439e-16	5.26162e-14	27.0099
1566491_at	---	---	---	4.10844	6.21027	20.1387	1.24152e-16	2.08528e-14	28.1349
203504_s_at	ABCA1	ATP-binding cassette, sub-family A (ABC1), member 1	19	4.04831	7.23076	19.9573	1.5272e-16	2.40661e-14	27.9266
1563881_at	---	---	---	3.98505	6.48606	17.9602	1.67882e-15	1.93482e-13	25.5081
201061_s_at	STOM	stomatin	2040	3.95894	8.76176	23.5342	3.40771e-18	9.40057e-16	31.7331
241897_at	---	---	---	3.95293	8.11501	21.0524	4.4841e-17	8.80887e-15	29.1578
209815_at	PTCH1	patched homolog 1 (Drosophila)	5727	3.87923	9.12501	22.8794	6.55967e-18	1.65144e-15	31.0806
217617_at	---	---	---	3.8169	8.10063	18.1773	1.27958e-15	1.5433e-13	25.7826
242188_at	---	---	---	3.78318	6.80732	19.146	3.93821e-16	5.432e-14	26.9724
231385_at	DPPA3	developmental pluripotency associated 3	359787	3.76443	4.65848	15.6601	3.5964e-14	2.69532e-12	22.4007
231644_at	---	---	---	3.75989	5.46721	24.8471	9.62608e-19	3.20018e-16	32.9886
230472_at	IRX1	iroquois homeobox 1	79192	3.75143	8.10283	14.5214	1.88874e-13	1.09323e-11	20.7133
201427_s_at	SEPP1	selenoprotein P, plasma, 1	6414	3.73172	10.174	16.3003	1.47814e-14	1.22851e-12	23.3039
1569181_x_at	---	---	---	3.68774	7.29297	15.0898	8.14918e-14	5.30945e-12	21.5689
212599_at	AUTS2	autism susceptibility candidate 2	26053	3.68102	10.1442	26.8131	1.621e-19	6.56783e-17	34.7475
1569180_at	---	---	---	3.6805	7.29349	15.5432	4.24471e-14	3.07543e-12	22.2323
1557238_s_at	---	---	---	3.68029	6.62651	16.1372	1.84867e-14	1.49741e-12	23.0768
229638_at	IRX3	iroquois homeobox 3	79191	3.67141	9.15213	15.4529	4.82693e-14	3.41987e-12	22.1016
237449_at	SP8	Sp8 transcription factor	221833	3.64748	7.51395	19.5522	2.44023e-16	3.59532e-14	27.4548
225899_x_at	FLJ45445 /// LOC643670 /// LOC728105 /// tcag7.907	hypothetical LOC399844 /// similar to hCG1739109 /// similar to hCG1739109 /// hypothetical LOC402483	399844 /// 402483 /// 643670 /// 728105	3.6331	8.23554	19.7748	1.88422e-16	2.87411e-14	27.7151
241885_at	---	---	---	3.61394	6.64014	14.3602	2.40873e-13	1.34324e-11	20.4656
217164_at	---	---	---	3.61269	8.04055	17.2153	4.35798e-15	4.29683e-13	24.5425
228780_at	---	---	---	3.6076	7.95461	17.1278	4.88612e-15	4.76323e-13	24.4266
224549_x_at	---	---	---	3.60014	9.75383	12.1949	7.92429e-12	2.47871e-10	16.9018
242052_at	---	---	---	3.5939	8.00906	23.0968	5.26782e-18	1.39388e-15	31.2993
1568780_at	LOC649305	hypothetical LOC649305	649305	3.55477	8.08553	17.2712	4.05205e-15	4.08044e-13	24.6162
227833_s_at	MBD6	methyl-CpG binding domain protein 6	114785	3.53096	6.90181	21.3745	3.16114e-17	6.71898e-15	29.5083
236517_at	MEGF10	multiple EGF-like-domains 10	84466	3.49333	6.69279	17.3971	3.44206e-15	3.57024e-13	24.7814
231821_x_at	FLJ45445 /// LOC100128460 /// LOC100133177 /// LOC441124 /// LOC729021 /// LOC729218 /// LOC729660 /// LOC730235 /// tcag7.907	hypothetical LOC399844 /// similar to hCG1793472 /// hypothetical LOC100133177 /// hypothetical gene supported by AK093729; BX647918 /// hypothetical protein LOC729021 /// hypothetical LOC729218 /// hypothetical LOC729660 /// hypothetical LOC730235 /// hypothetical LOC402483	100128460 /// 100133177 /// 399844 /// 402483 /// 441124 /// 729021 /// 729218 /// 729660 /// 730235	3.47015	7.82843	17.9253	1.75435e-15	1.99527e-13	25.4635
237472_at	SOX1	SRY (sex determining region Y)-box 1	6656	3.46485	8.34689	17.4027	3.41716e-15	3.55865e-13	24.7888
203505_at	ABCA1	ATP-binding cassette, sub-family A (ABC1), member 1	19	3.40054	8.18743	18.4736	8.87243e-16	1.1278e-13	26.1526
234032_at	---	---	---	3.38287	7.22757	28.2543	4.73841e-20	2.19414e-17	35.9541
205862_at	GREB1	GREB1 protein	9687	3.36787	8.29957	12.2659	7.01675e-12	2.24909e-10	17.026
206104_at	ISL1	ISL LIM homeobox 1	3670	3.36756	8.30942	21.0073	4.71084e-17	9.18472e-15	29.1083
1559394_a_at	---	---	---	3.35847	6.99659	14.7	1.44627e-13	8.66123e-12	20.9851
1569041_at	---	---	---	3.32225	6.30061	15.5283	4.33512e-14	3.11396e-12	22.2108
1556088_at	RPAIN	RPA interacting protein	84268	3.31888	7.06388	13.6584	7.12741e-13	3.3482e-11	19.36
228455_at	RBM15	RNA binding motif protein 15	64783	3.29459	7.41975	21.3569	3.2216e-17	6.79182e-15	29.4893
213153_at	SETD1B	SET domain containing 1B	23067	3.26595	8.62818	28.4902	3.89651e-20	1.90642e-17	36.1453
242344_at	GABRB2	gamma-aminobutyric acid (GABA) A receptor, beta 2	2561	3.26193	5.94442	17.938	1.72641e-15	1.97425e-13	25.4798
223753_s_at	CFC1 /// CFC1B	cripto, FRL-1, cryptic family 1 /// cripto, FRL-1, cryptic family 1B	55997 /// 653275	3.2311	6.6338	20.3539	9.73178e-17	1.7051e-14	28.3797
227884_at	TAF15	TAF15 RNA polymerase II, TATA box binding protein (TBP)-associated factor, 68kDa	8148	3.21048	7.26118	13.0402	1.92281e-12	7.75433e-11	18.3476
234987_at	---	---	---	3.20247	6.11492	16.0503	2.08425e-14	1.66747e-12	22.955
1558714_at	---	---	---	3.18979	7.82492	19.8507	1.72634e-16	2.66115e-14	27.8032
232569_at	---	---	---	3.17084	6.86666	14.183	3.15517e-13	1.71165e-11	20.1906
1552897_a_at	KCNG3	potassium voltage-gated channel, subfamily G, member 3	170850	3.16505	5.61996	12.9827	2.1125e-12	8.41464e-11	18.2516
1560271_at	---	---	---	3.1489	8.52024	19.6768	2.11066e-16	3.19617e-14	27.6009
203276_at	LMNB1	lamin B1	4001	3.14009	9.33056	19.1155	4.08388e-16	5.57364e-14	26.9357
213605_s_at	LOC100134401 /// LOC100272216	hypothetical protein LOC100134401 /// hypothetical LOC100272216	100134401 /// 100272216	3.13954	9.48397	17.9209	1.76403e-15	1.99751e-13	25.458
240908_at	---	---	---	3.13859	7.13955	21.6329	2.39625e-17	5.31088e-15	29.7858
207034_s_at	GLI2	GLI family zinc finger 2	2736	3.13236	6.84228	12.4025	5.55948e-12	1.85299e-10	17.2638
201060_x_at	STOM	stomatin	2040	3.13214	8.71397	17.3728	3.55186e-15	3.65489e-13	24.7496
219433_at	BCOR	BCL6 co-repressor	54880	3.1216	7.01922	12.2737	6.92305e-12	2.22659e-10	17.0398
201131_s_at	CDH1	cadherin 1, type 1, E-cadherin (epithelial)	999	3.12085	9.67133	21.0002	4.74756e-17	9.18723e-15	29.1005
1553411_s_at	SALL3	sal-like 3 (Drosophila)	27164	3.11833	6.62323	20.4353	8.88099e-17	1.59926e-14	28.4717
232889_at	---	---	---	3.10151	9.20118	20.638	7.08118e-17	1.30228e-14	28.6992
217427_s_at	HIRA	HIR histone cell cycle regulation defective homolog A (S. cerevisiae)	7290	3.09972	8.08434	18.6929	6.78835e-16	8.75765e-14	26.423
235716_at	---	---	---	3.09702	9.02177	21.099	4.26152e-17	8.56632e-15	29.2088
230056_at	BPTF	bromodomain PHD finger transcription factor	2186	3.08224	6.46214	13.6302	7.45194e-13	3.47547e-11	19.3146
241838_at	---	---	---	3.06649	6.45518	11.972	1.16514e-11	3.47594e-10	16.5081
237322_at	MIAT	myocardial infarction associated transcript (non-protein coding)	440823	3.05435	8.37239	16.9582	6.10778e-15	5.81204e-13	24.2004
211996_s_at	LOC100132247 /// LOC613037 /// NPIPL3	similar to Uncharacterized protein KIAA0220 /// nuclear pore complex interacting protein pseudogene /// nuclear pore complex interacting protein-like 3	100132247 /// 23117 /// 613037	3.04912	10.2211	16.9568	6.11888e-15	5.81204e-13	24.1985
227527_at	MLL2	myeloid/lymphoid or mixed-lineage leukemia 2	8085	3.04624	8.03382	20.1267	1.25867e-16	2.09221e-14	28.1211
231776_at	EOMES	eomesodermin homolog (Xenopus laevis)	8320	3.04529	8.5709	20.0205	1.42068e-16	2.30248e-14	27.9993
202286_s_at	TACSTD2	tumor-associated calcium signal transducer 2	4070	3.04192	6.82215	12.5774	4.13849e-12	1.46007e-10	17.5652
213089_at	LOC100272216	hypothetical LOC100272216	100272216	3.03836	7.9075	16.7827	7.70919e-15	7.01428e-13	23.9643
227891_s_at	TAF15	TAF15 RNA polymerase II, TATA box binding protein (TBP)-associated factor, 68kDa	8148	3.02154	7.56975	16.1477	1.82214e-14	1.48584e-12	23.0915
227129_x_at	tcag7.907	hypothetical LOC402483	402483	3.00466	7.79047	20.0938	1.30668e-16	2.14453e-14	28.0835
244878_at	---	---	---	2.99573	6.34475	16.7464	8.09195e-15	7.30925e-13	23.9152
230964_at	FREM2	FRAS1 related extracellular matrix protein 2	341640	2.99425	8.90429	16.1931	1.71198e-14	1.40042e-12	23.1548
239649_at	---	---	---	2.98764	6.59854	13.972	4.36604e-13	2.21845e-11	19.8596
204400_at	EFS	embryonal Fyn-associated substrate	10278	2.98495	9.14881	18.798	5.97657e-16	7.8272e-14	26.5516
225380_at	SGK493	protein kinase-like protein SgK493	91461	2.98244	9.48031	19.4183	2.85433e-16	4.08926e-14	27.2968
227444_at	ARMCX4	Armadillo repeat containing, X-linked 4	158947	2.97763	6.7194	19.673	2.12002e-16	3.19617e-14	27.5964
244625_at	---	---	---	2.97476	7.2585	18.3124	1.08211e-15	1.34905e-13	25.952
227168_at	MIAT	myocardial infarction associated transcript (non-protein coding)	440823	2.93348	9.04439	20.3096	1.0231e-16	1.78053e-14	28.3295
225627_s_at	CACHD1	cache domain containing 1	57685	2.9305	9.12103	18.4628	8.99038e-16	1.13722e-13	26.1393
228623_at	---	---	---	2.92742	7.95393	13.4814	9.43632e-13	4.25407e-11	19.0738
212124_at	ZMIZ1	zinc finger, MIZ-type containing 1	57178	2.91828	9.51998	16.9334	6.31143e-15	5.95133e-13	24.1671
243672_at	SALL3	Sal-like 3 (Drosophila)	27164	2.91405	7.76882	21.979	1.66105e-17	3.95163e-15	30.1525
243233_at	---	---	---	2.90992	6.80087	13.3376	1.18752e-12	5.23698e-11	18.8393
242121_at	---	---	---	2.90344	9.73136	17.1306	4.86835e-15	4.76323e-13	24.4303
210002_at	GATA6	GATA binding protein 6	2627	2.90316	8.40564	11.857	1.4246e-11	4.12874e-10	16.3027
220940_at	ANKRD36B	ankyrin repeat domain 36B	57730	2.89996	8.81803	12.4196	5.40084e-12	1.81646e-10	17.2933
230785_at	---	---	---	2.89971	8.3909	22.0994	1.46407e-17	3.51526e-15	30.2788
203083_at	THBS2	thrombospondin 2	7058	2.89165	6.08667	18.9404	5.03455e-16	6.72943e-14	26.7246
1558922_at	---	---	---	2.89023	7.04824	14.9081	1.06308e-13	6.65864e-12	21.2984
218917_s_at	ARID1A	AT rich interactive domain 1A (SWI-like)	8289	2.87101	9.75127	16.828	7.25807e-15	6.69783e-13	24.0255
207186_s_at	BPTF	bromodomain PHD finger transcription factor	2186	2.86839	10.1136	19.1961	3.71066e-16	5.17318e-14	27.0324
232882_at	---	---	---	2.85171	6.54856	20.861	5.53177e-17	1.04704e-14	28.9471
241060_x_at	---	---	---	2.84848	6.44284	14.1495	3.32112e-13	1.78302e-11	20.1384
232568_at	MGC24103	hypothetical MGC24103	158295	2.84557	7.18671	17.086	5.16186e-15	4.99448e-13	24.3709
241391_at	---	---	---	2.84351	6.662	15.6067	3.87892e-14	2.86565e-12	22.3239
1562169_at	---	---	---	2.8198	6.71352	11.8573	1.42372e-11	4.12874e-10	16.3033
213579_s_at	EP300	E1A binding protein p300	2033	2.81621	8.08534	14.9371	1.01874e-13	6.47471e-12	21.3418
212560_at	SORL1	sortilin-related receptor, L(DLR class) A repeats-containing	6653	2.81072	8.04017	16.0603	2.05573e-14	1.65038e-12	22.969
208610_s_at	SRRM2	serine/arginine repetitive matrix 2	23524	2.80404	9.56326	15.6489	3.65386e-14	2.73049e-12	22.3846
1564378_a_at	---	---	---	2.80209	7.81314	14.5101	1.92107e-13	1.10947e-11	20.696
237491_at	---	---	---	2.80152	6.81227	14.798	1.25051e-13	7.64787e-12	21.1332
242068_at	---	---	---	2.78869	6.37823	14.9143	1.05349e-13	6.61452e-12	21.3077
223642_at	ZIC2	Zic family member 2 (odd-paired homolog, Drosophila)	7546	2.78652	10.2469	17.6465	2.49834e-15	2.73238e-13	25.1059
241535_at	---	---	---	2.7655	5.30508	10.932	7.5565e-11	1.69212e-09	14.5976
205113_at	NEFM	neurofilament, medium polypeptide	4741	2.76478	9.63581	17.7345	2.23322e-15	2.4814e-13	25.2194
236062_at	---	---	---	2.76244	6.83808	14.9323	1.026e-13	6.48907e-12	21.3346
238299_at	---	---	---	2.7519	7.83768	17.0638	5.31437e-15	5.12293e-13	24.3414
205278_at	GAD1	glutamate decarboxylase 1 (brain, 67kDa)	2571	2.75015	7.3564	20.6717	6.82025e-17	1.27235e-14	28.7369
244803_at	---	---	---	2.74217	7.137	12.3289	6.3005e-12	2.05507e-10	17.136
233152_x_at	---	---	---	2.74027	7.76246	12.4876	4.81394e-12	1.64684e-10	17.4108
225703_at	FBRSL1	fibrosin-like 1	57666	2.73314	7.34633	14.5822	1.72413e-13	1.00019e-11	20.8062
239735_at	---	---	---	2.72844	7.42358	14.3806	2.3355e-13	1.3137e-11	20.4971
242945_at	FAM20A	family with sequence similarity 20, member A	54757	2.72625	5.37625	17.2931	3.93854e-15	3.99624e-13	24.645
202221_s_at	EP300	E1A binding protein p300	2033	2.72048	7.48554	13.6823	6.86399e-13	3.25393e-11	19.3984
234562_x_at	LOC728678	Similar to p40	728678	2.7187	8.18162	8.4743	1.0456e-08	1.18244e-07	9.55999
209348_s_at	MAF	v-maf musculoaponeurotic fibrosarcoma oncogene homolog (avian)	4094	2.71699	7.65446	14.1808	3.16587e-13	1.71387e-11	20.1872
240971_x_at	---	---	---	2.70827	7.03471	12.3657	5.91835e-12	1.95501e-10	17.1999
228507_at	---	---	---	2.70579	7.21649	14.9449	1.00714e-13	6.4296e-12	21.3534
1555963_x_at	B3GNT7	UDP-GlcNAc:betaGal beta-1,3-N-acetylglucosaminyltransferase 7	93010	2.69067	7.09469	14.5913	1.70076e-13	9.91068e-12	20.8201
1559391_s_at	---	---	---	2.6902	6.3237	15.744	3.19563e-14	2.42298e-12	22.5208
243416_at	---	---	---	2.6876	7.50025	15.5433	4.24366e-14	3.07543e-12	22.2325
230885_at	SPG7	spastic paraplegia 7 (pure and complicated autosomal recessive)	6687	2.68628	7.9609	17.7324	2.23921e-15	2.4814e-13	25.2167
221646_s_at	ZDHHC11	zinc finger, DHHC-type containing 11	79844	2.67574	6.65857	9.81463	6.47092e-10	1.05799e-08	12.4025
232909_s_at	BPTF	bromodomain PHD finger transcription factor	2186	2.6737	9.11698	16.3975	1.29464e-14	1.09353e-12	23.4384
241893_at	---	---	---	2.66061	6.31825	13.9712	4.37171e-13	2.21845e-11	19.8583
230713_at	---	---	---	2.65713	7.61115	11.7655	1.67311e-11	4.6802e-10	16.1384
202035_s_at	SFRP1	secreted frizzled-related protein 1	6422	2.65599	7.48501	10.0126	4.37452e-10	7.49244e-09	12.8027
1570143_at	---	---	---	2.65386	7.43307	17.2669	4.07513e-15	4.08044e-13	24.6104
235009_at	BOD1L	biorientation of chromosomes in cell division 1-like	259282	2.64825	7.46465	8.82915	4.89272e-09	6.17088e-08	10.3354
1552287_s_at	AFG3L1	AFG3 ATPase family gene 3-like 1 (S. cerevisiae)	172	2.64675	7.5941	15.382	5.34257e-14	3.71745e-12	21.9984
218974_at	SOBP	sine oculis binding protein homolog (Drosophila)	55084	2.646	8.9818	21.3247	3.33561e-17	6.97547e-15	29.4544
228925_at	---	---	---	2.64234	6.6081	14.2218	2.97317e-13	1.62652e-11	20.2512
236000_s_at	---	---	---	2.6417	7.82371	11.5401	2.49636e-11	6.61218e-10	15.7295
226134_s_at	---	---	---	2.63287	8.98319	14.0032	4.16063e-13	2.14603e-11	19.9087
235964_x_at	---	---	---	2.62989	7.46508	13.2151	1.44692e-12	6.13075e-11	18.6378
230493_at	SHISA2	shisa homolog 2 (Xenopus laevis)	387914	2.62865	8.28589	16.2292	1.62921e-14	1.34117e-12	23.2051
223673_at	RFX4	regulatory factor X, 4 (influences HLA class II expression)	5992	2.62823	8.25793	14.4681	2.04627e-13	1.16109e-11	20.6317
236621_at	RPS27 /// RPS27P13 /// RPS27P21 /// RPS27P23 /// RPS27P29 /// RPS27P6 /// RPS27P7	ribosomal protein S27 /// ribosomal protein S27 pseudogene 13 /// ribosomal protein S27 pseudogene 21 /// ribosomal protein S27 pseudogene 23 /// ribosomal protein S27 pseudogene 29 /// ribosomal protein S27 pseudogene 6 /// ribosomal protein S27 pseudogene 7	100130070 /// 100130775 /// 100131787 /// 100131905 /// 100132291 /// 100132488 /// 6232	2.62685	6.15983	12.8877	2.46938e-12	9.55724e-11	18.0923
204851_s_at	DCX	doublecortin	1641	2.61661	9.60019	14.877	1.11282e-13	6.92003e-12	21.2519
200959_at	FUS	fusion (involved in t(12;16) in malignant liposarcoma)	2521	2.60691	10.8927	14.4741	2.02813e-13	1.15586e-11	20.6408
230618_s_at	---	---	---	2.60388	8.53157	20.1485	1.22785e-16	2.081e-14	28.146
242794_at	MAML3	mastermind-like 3 (Drosophila)	55534	2.60145	7.34214	13.3764	1.116e-12	4.9384e-11	18.9027
231953_at	BPTF	bromodomain PHD finger transcription factor	2186	2.60026	7.0613	15.4207	5.0544e-14	3.56157e-12	22.0548
244813_at	---	---	---	2.59836	6.56166	14.0341	3.96656e-13	2.08212e-11	19.9574
209291_at	ID4	inhibitor of DNA binding 4, dominant negative helix-loop-helix protein	3400	2.59104	10.3062	15.889	2.60822e-14	2.03716e-12	22.7272
244356_at	---	---	---	2.5898	7.03446	13.9009	4.87556e-13	2.45016e-11	19.7471
235060_at	LOC100190986	hypothetical LOC100190986	100190986	2.58929	7.97378	15.3857	5.31437e-14	3.71447e-12	22.0038
222415_at	MLL3	myeloid/lymphoid or mixed-lineage leukemia 3	58508	2.57832	8.28651	12.7344	3.1831e-12	1.16913e-10	17.8331
36499_at	CELSR2	cadherin, EGF LAG seven-pass G-type receptor 2 (flamingo homolog, Drosophila)	1952	2.57732	8.40012	18.27	1.14042e-15	1.41494e-13	25.899
227361_at	HS3ST3B1	heparan sulfate (glucosamine) 3-O-sulfotransferase 3B1	9953	2.577	7.36433	12.4149	5.4442e-12	1.82867e-10	17.2852
1569320_at	GPBP1L1	GC-rich promoter binding protein 1-like 1	60313	2.57597	6.2871	12.6146	3.88796e-12	1.38678e-10	17.6289
232069_at	KIF26A	kinesin family member 26A	26153	2.56567	7.12995	13.4821	9.42549e-13	4.25407e-11	19.075
242343_x_at	---	---	---	2.56419	8.57419	12.6188	3.86059e-12	1.37891e-10	17.6361
227576_at	---	---	---	2.56124	8.5403	19.3643	3.04179e-16	4.31701e-14	27.2327
234723_x_at	---	---	---	2.55407	9.3504	9.14353	2.53139e-09	3.45481e-08	11.0086
230332_at	ZCCHC7	Zinc finger, CCHC domain containing 7	84186	2.55341	7.14394	12.7977	2.86572e-12	1.07794e-10	17.9404
203062_s_at	MDC1	mediator of DNA damage checkpoint 1	9656	2.55196	8.15078	20.0879	1.3155e-16	2.14543e-14	28.0767
238593_at	C11orf80	chromosome 11 open reading frame 80	79703	2.54968	6.8257	14.8122	1.22457e-13	7.50691e-12	21.1545
242064_at	SDK2	sidekick homolog 2 (chicken)	54549	2.54779	8.79272	17.3401	3.70548e-15	3.78295e-13	24.7068
244867_at	---	---	---	2.53649	5.99523	7.69179	5.92022e-08	5.40399e-07	7.79143
206935_at	PCDH8	protocadherin 8	5100	2.52973	8.59927	13.2267	1.41984e-12	6.04404e-11	18.657
229434_at	---	---	---	2.52935	9.85927	15.5325	4.30971e-14	3.10431e-12	22.2168
218724_s_at	TGIF2	TGFB-induced factor homeobox 2	60436	2.52539	7.43997	13.4805	9.44947e-13	4.25407e-11	19.0724
47560_at	LPHN1	latrophilin 1	22859	2.52161	7.86245	15.6177	3.81879e-14	2.82929e-12	22.3398
209271_at	BPTF	bromodomain PHD finger transcription factor	2186	2.51437	8.95526	18.1726	1.28703e-15	1.54509e-13	25.7768
207147_at	DLX2	distal-less homeobox 2	1746	2.50007	6.07363	11.9715	1.1662e-11	3.47594e-10	16.5071
206268_at	LEFTY1	left-right determination factor 1	10637	2.49332	6.62824	7.57517	7.71913e-08	6.8269e-07	7.52105
1565717_s_at	FUS /// NR1H3	fusion (involved in t(12;16) in malignant liposarcoma) /// nuclear receptor subfamily 1, group H, member 3	10062 /// 2521	2.48441	8.61732	11.8206	1.51845e-11	4.3383e-10	16.2375
222380_s_at	PDCD6	Programmed cell death 6	10016	2.48353	7.52259	16.1353	1.85364e-14	1.49741e-12	23.0741
225240_s_at	MSI2	musashi homolog 2 (Drosophila)	124540	2.48295	8.86123	11.5422	2.48713e-11	6.59447e-10	15.7333
1553613_s_at	FOXC1	forkhead box C1	2296	2.48214	7.19046	11.9899	1.12944e-11	3.38286e-10	16.5398
234294_x_at	GATAD2A	GATA zinc finger domain containing 2A	54815	2.47912	8.89847	15.6646	3.57385e-14	2.68619e-12	22.4071
202160_at	CREBBP	CREB binding protein	1387	2.47891	9.13624	15.043	8.72444e-14	5.64173e-12	21.4995
1560386_at	---	---	---	2.47733	6.85146	10.3884	2.10805e-10	4.02533e-09	13.5489
232975_at	HCG18	HLA complex group 18	414777	2.47677	7.45106	10.8956	8.08513e-11	1.79346e-09	14.5285
226548_at	SBK1	SH3-binding domain kinase 1	388228	2.47523	8.90765	16.4687	1.17556e-14	1.00605e-12	23.5363
204457_s_at	GAS1	growth arrest-specific 1	2619	2.46757	9.85561	15.9061	2.54679e-14	1.99519e-12	22.7514
217653_x_at	---	---	---	2.46714	7.0741	11.8078	1.55298e-11	4.41078e-10	16.2145
201368_at	ZFP36L2	zinc finger protein 36, C3H type-like 2	678	2.465	9.82429	17.2077	4.40153e-15	4.32333e-13	24.5324
234649_at	---	---	---	2.46448	7.31807	18.0937	1.42011e-15	1.68151e-13	25.6773
229899_s_at	C20orf199	chromosome 20 open reading frame 199	441951	2.46276	7.16982	13.2324	1.40681e-12	5.99999e-11	18.6664
229273_at	SALL1	sal-like 1 (Drosophila)	6299	2.45566	8.36108	11.8131	1.53851e-11	4.37448e-10	16.2241
211946_s_at	BAT2D1	BAT2 domain containing 1	23215	2.45458	11.4171	18.7312	6.48055e-16	8.40235e-14	26.4698
202935_s_at	SOX9	SRY (sex determining region Y)-box 9	6662	2.45258	7.09552	13.9756	4.34187e-13	2.21845e-11	19.8653
226670_s_at	PABPC1L	poly(A) binding protein, cytoplasmic 1-like	80336	2.44979	8.18873	16.4162	1.26219e-14	1.0696e-12	23.4642
233678_at	---	---	---	2.44783	6.1103	13.4765	9.50965e-13	4.27374e-11	19.0659
233899_x_at	ZBTB10	zinc finger and BTB domain containing 10	65986	2.44459	7.35315	14.5855	1.71558e-13	9.97457e-12	20.8112
207760_s_at	NCOR2	nuclear receptor co-repressor 2	9612	2.44387	8.40253	18.2431	1.17906e-15	1.45591e-13	25.8653
227481_at	CNKSR3	CNKSR family member 3	154043	2.44198	7.42964	21.1403	4.07399e-17	8.25333e-15	29.254
225237_s_at	MSI2	musashi homolog 2 (Drosophila)	124540	2.43923	7.84338	11.1316	5.22892e-11	1.23489e-09	14.9739
239784_at	---	---	---	2.43771	7.02907	10.9397	7.44875e-11	1.67232e-09	14.6123
213994_s_at	SPON1	spondin 1, extracellular matrix protein	10418	2.42114	8.17909	15.1785	7.1637e-14	4.77537e-12	21.7001
235529_x_at	---	---	---	2.41984	8.31158	17.6435	2.50784e-15	2.73238e-13	25.102
237768_x_at	---	---	---	2.41949	8.7389	12.3729	5.84586e-12	1.936e-10	17.2125
232174_at	---	---	---	2.41354	8.62537	18.2066	1.23381e-15	1.50206e-13	25.8194
226492_at	SEMA6D	sema domain, transmembrane domain (TM), and cytoplasmic domain, (semaphorin) 6D	80031	2.41135	8.1967	13.2985	1.26472e-12	5.51186e-11	18.7751
201055_s_at	HNRNPA0	heterogeneous nuclear ribonucleoprotein A0	10949	2.4109	9.3562	15.9389	2.43285e-14	1.91751e-12	22.7979
222310_at	SFRS15	splicing factor, arginine/serine-rich 15	57466	2.40929	7.43206	10.2084	2.98404e-10	5.41871e-09	13.1937
222414_at	MLL3	myeloid/lymphoid or mixed-lineage leukemia 3	58508	2.40713	8.20694	13.1618	1.57733e-12	6.57583e-11	18.5497
207435_s_at	SRRM2	serine/arginine repetitive matrix 2	23524	2.40694	8.83078	18.8464	5.63743e-16	7.4282e-14	26.6105
235028_at	---	---	---	2.40349	7.19253	11.6748	1.96419e-11	5.38409e-10	15.9745
232626_at	---	---	---	2.40323	6.31506	15.2206	6.73978e-14	4.516e-12	21.7621
214055_x_at	BAT2D1	BAT2 domain containing 1	23215	2.40254	9.81667	14.8272	1.19767e-13	7.35943e-12	21.1771
232338_at	---	---	---	2.39888	6.41962	12.3384	6.19933e-12	2.02973e-10	17.1525
226143_at	RAI1	retinoic acid induced 1	10743	2.39732	8.69562	14.696	1.45487e-13	8.6927e-12	20.9791
224254_x_at	---	---	---	2.39636	8.89214	10.5221	1.63271e-10	3.26177e-09	13.8101
1553185_at	RASEF	RAS and EF-hand domain containing	158158	2.39508	10.984	12.439	5.22637e-12	1.76465e-10	17.3269
239752_at	---	---	---	2.39176	9.63149	15.5617	4.13413e-14	3.03688e-12	22.2591
221378_at	CER1	cerberus 1, cysteine knot superfamily, homolog (Xenopus laevis)	9350	2.38438	7.88659	10.5653	1.50385e-10	3.03709e-09	13.8941
239577_at	---	---	---	2.38295	6.90906	13.1803	1.53057e-12	6.42222e-11	18.5804
1554636_at	---	---	---	2.37743	6.15135	7.04641	2.62875e-07	1.99316e-06	6.2736
232523_at	MEGF10	multiple EGF-like-domains 10	84466	2.37539	8.92496	16.3926	1.30342e-14	1.09737e-12	23.4315
242022_at	---	---	---	2.37525	8.27386	18.6027	7.57632e-16	9.6779e-14	26.3121
225048_at	PHF10	PHD finger protein 10	55274	2.37447	8.86008	13.3508	1.1626e-12	5.13582e-11	18.861
240314_at	---	---	---	2.37431	6.19358	14.8495	1.15886e-13	7.15485e-12	21.2106
238913_at	---	---	---	2.36947	7.77881	11.5971	2.25504e-11	6.04086e-10	15.8334
243016_at	---	---	---	2.36792	6.0186	10.1595	3.28175e-10	5.88765e-09	13.0965
226030_at	ACADSB	acyl-Coenzyme A dehydrogenase, short/branched chain	36	2.36763	7.29946	15.8111	2.90807e-14	2.24432e-12	22.6166
219764_at	FZD10	frizzled homolog 10 (Drosophila)	11211	2.36757	8.58337	17.5717	2.74924e-15	2.94589e-13	25.009
239630_at	---	---	---	2.36722	7.26262	11.584	2.3084e-11	6.15834e-10	15.8095
243003_at	---	---	---	2.36	7.66044	12.2039	7.80287e-12	2.44663e-10	16.9176
243907_at	---	---	---	2.35709	7.8513	14.9196	1.04531e-13	6.57913e-12	21.3156
201295_s_at	WSB1	WD repeat and SOCS box-containing 1	26118	2.35654	6.93072	6.62848	7.09977e-07	4.74985e-06	5.26395
219312_s_at	ZBTB10	zinc finger and BTB domain containing 10	65986	2.35479	7.61512	11.7989	1.57765e-11	4.46617e-10	16.1984
213360_s_at	POM121 /// POM121C	POM121 membrane glycoprotein (rat) /// POM121 membrane glycoprotein C	100101267 /// 9883	2.35231	9.72441	14.7195	1.40482e-13	8.43248e-12	21.0147
1554314_at	C6orf141	chromosome 6 open reading frame 141	135398	2.35226	6.88865	9.68773	8.33837e-10	1.31123e-08	12.1433
240798_at	---	---	---	2.35138	6.8161	11.4953	2.70462e-11	7.0628e-10	15.6476
214659_x_at	YLPM1	YLP motif containing 1	56252	2.3466	7.7964	10.5003	1.70194e-10	3.3715e-09	13.7676
243221_at	FAM20A	family with sequence similarity 20, member A	54757	2.34602	5.73443	9.64665	9.05547e-10	1.40609e-08	12.059
225786_at	C1orf199	chromosome 1 open reading frame 199	284702	2.34111	8.77278	13.6624	7.08333e-13	3.33353e-11	19.3663
202230_s_at	CHERP	calcium homeostasis endoplasmic reticulum protein	10523	2.34083	9.60972	14.1418	3.3606e-13	1.80049e-11	20.1263
211535_s_at	FGFR1	fibroblast growth factor receptor 1	2260	2.33695	9.58577	15.5487	4.21148e-14	3.07543e-12	22.2403
212520_s_at	SMARCA4	SWI/SNF related, matrix associated, actin dependent regulator of chromatin, subfamily a, member 4	6597	2.33596	8.97	15.3533	5.56734e-14	3.83954e-12	21.9565
212787_at	YLPM1	YLP motif containing 1	56252	2.3357	8.40547	21.9232	1.76158e-17	4.03923e-15	30.0938
237483_at	---	---	---	2.33462	7.71284	13.2807	1.30139e-12	5.64322e-11	18.7459
238883_at	---	---	---	2.3326	7.35325	13.141	1.63151e-12	6.76905e-11	18.5153
210061_at	ZNF589	zinc finger protein 589	51385	2.33162	5.67372	8.79145	5.29963e-09	6.61013e-08	10.2538
229129_at	---	---	---	2.32282	7.70708	15.1228	7.76721e-14	5.11197e-12	21.6178
214920_at	THSD7A	thrombospondin, type I, domain containing 7A	221981	2.32164	7.83028	9.1632	2.43019e-09	3.33248e-08	11.0503
211947_s_at	BAT2D1	BAT2 domain containing 1	23215	2.32004	7.69299	14.131	3.41694e-13	1.82314e-11	20.1094
213090_s_at	TAF4	TAF4 RNA polymerase II, TATA box binding protein (TBP)-associated factor, 135kDa	6874	2.31821	8.04035	12.0221	1.06807e-11	3.21301e-10	16.5969
230256_at	C1orf104	Chromosome 1 open reading frame 104	284618	2.3125	7.86272	13.317	1.22762e-12	5.38637e-11	18.8054
213194_at	ROBO1	roundabout, axon guidance receptor, homolog 1 (Drosophila)	6091	2.30976	10	14.1155	3.49916e-13	1.86318e-11	20.0852
209687_at	CXCL12	chemokine (C-X-C motif) ligand 12 (stromal cell-derived factor 1)	6387	2.30737	7.82468	14.7201	1.40355e-13	8.43248e-12	21.0156
219208_at	FBXO11	F-box protein 11	80204	2.30388	5.86858	15.8043	2.93621e-14	2.25931e-12	22.6068
239106_at	CA5BP	Carbonic anhydrase VB pseudogene	340591	2.30305	6.08415	8.4404	1.12526e-08	1.26208e-07	9.48503
1555962_at	B3GNT7	UDP-GlcNAc:betaGal beta-1,3-N-acetylglucosaminyltransferase 7	93010	2.30191	6.13296	10.9604	7.16894e-11	1.61932e-09	14.6514
214753_at	N4BP2L2	NEDD4 binding protein 2-like 2	10443	2.30059	7.70296	10.8629	8.59214e-11	1.88496e-09	14.4663
226568_at	FAM102B	family with sequence similarity 102, member B	284611	2.30044	8.34616	15.2481	6.47773e-14	4.36296e-12	21.8025
1570515_a_at	FILIP1	filamin A interacting protein 1	27145	2.29914	6.21652	11.0138	6.49499e-11	1.48651e-09	14.7523
244112_x_at	---	---	---	2.29904	5.85687	10.4527	1.86399e-10	3.63423e-09	13.6747
219437_s_at	ANKRD11	ankyrin repeat domain 11	29123	2.29855	8.13454	13.0228	1.97811e-12	7.9403e-11	18.3187
226100_at	MLL5	myeloid/lymphoid or mixed-lineage leukemia 5 (trithorax homolog, Drosophila)	55904	2.29672	8.68408	13.2897	1.28268e-12	5.57138e-11	18.7607
244778_x_at	---	---	---	2.29226	7.01589	12.4128	5.46352e-12	1.83042e-10	17.2816
1562280_at	---	---	---	2.29147	6.34338	10.4541	1.85873e-10	3.62908e-09	13.6776
221841_s_at	KLF4	Kruppel-like factor 4 (gut)	9314	2.29069	5.88635	15.6663	3.56533e-14	2.68619e-12	22.4096
209864_at	FRAT2	frequently rearranged in advanced T-cell lymphomas 2	23401	2.29008	8.54249	13.1855	1.51787e-12	6.38958e-11	18.5889
232144_at	---	---	---	2.29	7.19222	12.6104	3.91545e-12	1.39466e-10	17.6217
214815_at	TRIM33	tripartite motif-containing 33	51592	2.28753	7.09745	10.9421	7.41568e-11	1.66634e-09	14.6168
209602_s_at	GATA3	GATA binding protein 3	2625	2.28648	6.32787	8.49963	9.89867e-09	1.12827e-07	9.6159
243149_at	---	---	---	2.28644	6.18479	11.5043	2.66142e-11	6.95855e-10	15.6641
208794_s_at	SMARCA4	SWI/SNF related, matrix associated, actin dependent regulator of chromatin, subfamily a, member 4	6597	2.28471	10.0033	13.5922	7.91341e-13	3.6578e-11	19.2533
242471_at	---	---	---	2.28456	8.06839	12.7968	2.87013e-12	1.07794e-10	17.9388
211948_x_at	BAT2D1	BAT2 domain containing 1	23215	2.28388	9.87991	13.8055	5.65787e-13	2.79456e-11	19.5954
241457_at	---	---	---	2.28216	6.97611	13.257	1.35207e-12	5.82401e-11	18.7069
229485_x_at	SHISA3	shisa homolog 3 (Xenopus laevis)	152573	2.2797	6.28381	9.66683	8.69551e-10	1.35997e-08	12.1005
202454_s_at	ERBB3	v-erb-b2 erythroblastic leukemia viral oncogene homolog 3 (avian)	2065	2.2793	7.16286	10.7308	1.10027e-10	2.32907e-09	14.2135
213046_at	PABPN1	poly(A) binding protein, nuclear 1	8106	2.27912	8.20856	12.6309	3.78317e-12	1.36252e-10	17.6568
1563494_at	---	---	---	2.27835	6.44413	9.59199	1.01096e-09	1.55303e-08	11.9465
230496_at	FAM123A	family with sequence similarity 123A	219287	2.26677	6.49364	11.917	1.28244e-11	3.77898e-10	16.4101
201997_s_at	SPEN	spen homolog, transcriptional regulator (Drosophila)	23013	2.26554	9.05667	18.4109	9.58315e-16	1.20049e-13	26.0748
228640_at	PCDH7	protocadherin 7	5099	2.2592	7.91094	16.4637	1.18349e-14	1.00951e-12	23.5295
225954_s_at	MIDN	midnolin	90007	2.25908	8.67918	13.6287	7.47037e-13	3.47781e-11	19.3121
239432_at	FLJ31306	hypothetical protein FLJ31306	379025	2.25844	6.46669	11.0264	6.34578e-11	1.46009e-09	14.7761
230479_at	---	---	---	2.25743	6.65525	10.3225	2.3931e-10	4.5033e-09	13.4193
223575_at	KIAA1549	KIAA1549	57670	2.25665	6.93611	10.5553	1.5329e-10	3.08375e-09	13.8746
240383_at	UBE2D3	ubiquitin-conjugating enzyme E2D 3 (UBC4/5 homolog, yeast)	7323	2.25593	7.08237	8.03769	2.72348e-08	2.72569e-07	8.58311
228173_at	GNAS	GNAS complex locus	2778	2.25457	7.93795	13.0933	1.76317e-12	7.18878e-11	18.4361
206893_at	SALL1	sal-like 1 (Drosophila)	6299	2.25441	7.53827	13.435	1.01614e-12	4.53519e-11	18.9983
227870_at	IGDCC4	immunoglobulin superfamily, DCC subclass, member 4	57722	2.25117	8.36193	12.8007	2.85145e-12	1.07472e-10	17.9455
206059_at	ZNF91	zinc finger protein 91	7644	2.24444	8.80159	9.94229	5.02432e-10	8.42183e-09	12.6611
222820_at	TNRC6C	trinucleotide repeat containing 6C	57690	2.24226	6.84295	14.016	4.07887e-13	2.12126e-11	19.929
201641_at	BST2	bone marrow stromal cell antigen 2	684	2.24209	6.88852	14.2604	2.80319e-13	1.5433e-11	20.3111
204913_s_at	SOX11	SRY (sex determining region Y)-box 11	6664	2.23888	10.7034	13.5065	9.06558e-13	4.13145e-11	19.1147
237310_at	---	---	---	2.23856	7.0721	11.0984	5.55812e-11	1.30197e-09	14.9115
205413_at	MPPED2	metallophosphoesterase domain containing 2	744	2.2377	7.59013	11.2954	3.87908e-11	9.53446e-10	15.2791
205534_at	PCDH7	protocadherin 7	5099	2.23605	7.02231	12.9569	2.20375e-12	8.69794e-11	18.2084
203453_at	SCNN1A	sodium channel, nonvoltage-gated 1 alpha	6337	2.23603	7.51147	12.2772	6.88214e-12	2.2169e-10	17.0458
212761_at	TCF7L2	transcription factor 7-like 2 (T-cell specific, HMG-box)	6934	2.23337	10.3844	15.5377	4.27794e-14	3.09001e-12	22.2243
211944_at	BAT2D1	BAT2 domain containing 1	23215	2.23335	9.46732	11.2463	4.24091e-11	1.03066e-09	15.188
1552622_s_at	LOC100134053 /// LOC441259 /// PMS2L12 /// POLR2J2 /// POLR2J4	similar to POLR2J4 protein /// PMS2 postmeiotic segregation increased 2 (S. cerevisiae)-like /// postmeiotic segregation increased 2-like 12 pseudogene /// polymerase (RNA) II (DNA directed) polypeptide J2 /// polymerase (RNA) II (DNA directed) polypeptide J4, pseudogene	100134053 /// 246721 /// 392713 /// 441259 /// 84820	2.23329	6.27333	11.6495	2.05425e-11	5.57787e-10	15.9287
1561642_at	---	---	---	2.23051	6.27419	8.21825	1.82746e-08	1.91311e-07	8.99015
1556469_s_at	---	---	---	2.23017	5.88179	12.3779	5.79637e-12	1.92207e-10	17.2212
228613_at	RAB11FIP3	RAB11 family interacting protein 3 (class II)	9727	2.22748	8.17002	13.751	6.16162e-13	2.99769e-11	19.5084
213880_at	LGR5	leucine-rich repeat-containing G protein-coupled receptor 5	8549	2.22704	6.82433	12.3213	6.38336e-12	2.07948e-10	17.1227
236978_at	---	---	---	2.22596	7.35578	11.0358	6.2367e-11	1.44267e-09	14.7938
1557987_at	LOC641298	SMG1 homolog, phosphatidylinositol 3-kinase-related kinase pseudogene	641298	2.21689	7.60536	13.9759	4.34016e-13	2.21845e-11	19.8657
227933_at	LINGO1	leucine rich repeat and Ig domain containing 1	84894	2.21478	8.43944	12.1661	8.32745e-12	2.57992e-10	16.8511
224873_s_at	MRPS25	mitochondrial ribosomal protein S25	64432	2.21428	6.79148	10.2356	2.83071e-10	5.19117e-09	13.2476
201996_s_at	SPEN	spen homolog, transcriptional regulator (Drosophila)	23013	2.21316	8.16648	14.4384	2.14016e-13	1.21171e-11	20.586
226705_at	FGFR1	fibroblast growth factor receptor 1	2260	2.2082	9.20166	20.1195	1.26905e-16	2.09603e-14	28.1129
223566_s_at	BCOR	BCL6 co-repressor	54880	2.20795	7.13205	10.9894	6.79444e-11	1.54009e-09	14.7062
208798_x_at	GOLGA8A	golgi autoantigen, golgin subfamily a, 8A	23015	2.20615	8.97619	14.0155	4.08202e-13	2.12126e-11	19.9282
213302_at	PFAS	phosphoribosylformylglycinamidine synthase	5198	2.2022	8.88677	16.2101	1.67235e-14	1.37233e-12	23.1786
243768_at	---	---	---	2.20215	9.15312	10.2058	2.99944e-10	5.43662e-09	13.1884
225767_at	LOC284801	hypothetical protein LOC284801	284801	2.2004	6.83906	11.7535	1.70887e-11	4.76481e-10	16.1168
221016_s_at	TCF7L1	transcription factor 7-like 1 (T-cell specific, HMG-box)	83439	2.19925	7.62469	15.4644	4.74855e-14	3.38282e-12	22.1182
222047_s_at	SRRT	serrate RNA effector molecule homolog (Arabidopsis)	51593	2.19874	10.5093	15.1083	7.93256e-14	5.18134e-12	21.5964
242688_at	---	---	---	2.19593	7.77353	15.5517	4.19333e-14	3.07167e-12	22.2447
212507_at	TMEM131	transmembrane protein 131	23505	2.19518	8.78782	12.5692	4.19606e-12	1.47837e-10	17.5511
217853_at	TNS3	tensin 3	64759	2.19496	8.38704	17.4146	3.36481e-15	3.54686e-13	24.8044
1553993_s_at	MED25	mediator complex subunit 25	81857	2.19483	8.50748	16.5617	1.03675e-14	9.08245e-13	23.6638
1553186_x_at	RASEF	RAS and EF-hand domain containing	158158	2.19465	11.2166	15.0303	8.88735e-14	5.73279e-12	21.4807
242837_at	SFRS4	Splicing factor, arginine/serine-rich 4	6429	2.19253	7.43585	12.8856	2.47814e-12	9.57684e-11	18.0887
241816_at	C14orf106	Chromosome 14 open reading frame 106	55320	2.18977	6.87349	8.83752	4.80687e-09	6.07146e-08	10.3535
243046_at	---	---	---	2.18713	6.70687	8.65257	7.12474e-09	8.47485e-08	9.95163
228287_at	ING5	inhibitor of growth family, member 5	84289	2.18681	8.30124	16.7529	8.02206e-15	7.27343e-13	23.924
238043_at	LOC729446	hypothetical LOC729446	729446	2.18471	6.98572	14.9354	1.02129e-13	6.47508e-12	21.3392
215470_at	GTF2H2B	general transcription factor IIH, polypeptide 2B	653238	2.18442	8.43496	10.9627	7.13882e-11	1.61392e-09	14.6557
201065_s_at	GTF2I /// GTF2IP1 /// LOC100093631	general transcription factor II, i /// general transcription factor II, i, pseudogene 1 /// general transcription factor II, i, pseudogene	100093631 /// 2969 /// 2970	2.1831	10.733	14.0892	3.64346e-13	1.93603e-11	20.044
212966_at	HIC2	hypermethylated in cancer 2	23119	2.18285	8.63666	13.7329	6.33918e-13	3.05542e-11	19.4795
206140_at	LHX2	LIM homeobox 2	9355	2.18065	7.66327	12.2671	7.00168e-12	2.24704e-10	17.0282
238735_at	---	---	---	2.1804	7.07279	10.6768	1.21797e-10	2.53071e-09	14.1097
216836_s_at	ERBB2	v-erb-b2 erythroblastic leukemia viral oncogene homolog 2, neuro/glioblastoma derived oncogene homolog (avian)	2064	2.17979	9.20181	17.5999	2.65163e-15	2.87696e-13	25.0456
243006_at	---	---	---	2.17973	6.71937	10.8561	8.70167e-11	1.90577e-09	14.4534
206002_at	GPR64	G protein-coupled receptor 64	10149	2.17967	6.25217	10.5289	1.61177e-10	3.2249e-09	13.8233
242990_at	---	---	---	2.17848	6.20719	11.2979	3.86125e-11	9.50866e-10	15.2838
1554770_x_at	ZNF785	zinc finger protein 785	146540	2.17574	6.03172	10.3152	2.42721e-10	4.55757e-09	13.4048
216511_s_at	TCF7L2	transcription factor 7-like 2 (T-cell specific, HMG-box)	6934	2.17539	7.7031	11.2309	4.36167e-11	1.05703e-09	15.1593
242074_at	---	---	---	2.17478	6.42654	11.8471	1.44957e-11	4.17977e-10	16.2849
215146_s_at	TTC28	tetratricopeptide repeat domain 28	23331	2.1747	8.16207	13.1496	1.60886e-12	6.68579e-11	18.5295
201430_s_at	DPYSL3	dihydropyrimidinase-like 3	1809	2.17415	7.79654	11.9228	1.26961e-11	3.74967e-10	16.4203
239591_at	---	---	---	2.17336	6.23207	9.22806	2.12505e-09	2.97702e-08	11.1873
1554769_at	ZNF785	zinc finger protein 785	146540	2.17317	6.52469	10.1925	3.07756e-10	5.56127e-09	13.1621
204367_at	SP2	Sp2 transcription factor	6668	2.17152	6.47621	11.8466	1.45069e-11	4.17977e-10	16.2841
217482_at	---	---	---	2.16975	7.54225	13.7396	6.27281e-13	3.03471e-11	19.4902
243745_at	---	---	---	2.16942	9.07523	11.0282	6.32399e-11	1.45637e-09	14.7796
237383_at	---	---	---	2.16935	7.50856	9.32679	1.73424e-09	2.48319e-08	11.395
228157_at	ZNF207	zinc finger protein 207	7756	2.16919	8.89695	12.6564	3.62543e-12	1.313e-10	17.7003
229649_at	NRXN3	neurexin 3	9369	2.16739	8.03789	15.1173	7.82943e-14	5.13987e-12	21.6097
212079_s_at	MLL	myeloid/lymphoid or mixed-lineage leukemia (trithorax homolog, Drosophila)	4297	2.16623	7.00903	10.1183	3.55629e-10	6.30336e-09	13.0143
242920_at	---	---	---	2.16612	6.49235	10.8646	8.56571e-11	1.88076e-09	14.4695
220969_s_at	---	---	---	2.16463	6.96051	11.5328	2.52933e-11	6.67224e-10	15.7161
220116_at	KCNN2	potassium intermediate/small conductance calcium-activated channel, subfamily N, member 2	3781	2.16451	8.33012	12.2527	7.17685e-12	2.28347e-10	17.003
209459_s_at	ABAT	4-aminobutyrate aminotransferase	18	2.16438	8.57636	9.99437	4.5342e-10	7.71499e-09	12.766
241905_at	PIK3C2A	Phosphoinositide-3-kinase, class 2, alpha polypeptide	5286	2.1638	7.10772	12.4949	4.75495e-12	1.63312e-10	17.4234
229782_at	RMST	rhabdomyosarcoma 2 associated transcript (non-protein coding)	196475	2.16343	9.61798	16.2297	1.62802e-14	1.34117e-12	23.2058
215599_at	LOC653188	glucuronidase, beta pseudogene	653188	2.15955	6.80506	9.33612	1.70138e-09	2.43883e-08	11.4145
213593_s_at	TRA2A	transformer 2 alpha homolog (Drosophila)	29896	2.15857	8.14847	11.3808	3.3233e-11	8.38292e-10	15.4371
55872_at	ZNF512B	zinc finger protein 512B	57473	2.15829	7.68405	14.3543	2.43038e-13	1.3478e-11	20.4565
226082_s_at	SFRS15	splicing factor, arginine/serine-rich 15	57466	2.1569	8.92264	13.9728	4.36067e-13	2.21845e-11	19.8609
221501_x_at	LOC339047	hypothetical protein LOC339047	339047	2.15403	10.4484	19.3116	3.23675e-16	4.53687e-14	27.1701
241702_at	---	---	---	2.15398	7.17845	8.72968	6.04324e-09	7.39186e-08	10.1197
222325_at	---	---	---	2.15338	8.82279	10.6839	1.20169e-10	2.50692e-09	14.1234
202289_s_at	TACC2	transforming, acidic coiled-coil containing protein 2	10579	2.15327	8.85016	16.7029	8.57591e-15	7.66834e-13	23.8563
201818_at	LPCAT1	lysophosphatidylcholine acyltransferase 1	79888	2.15308	8.81401	15.543	4.2459e-14	3.07543e-12	22.232
226575_at	ZNF462	zinc finger protein 462	58499	2.15132	9.91831	14.6828	1.48379e-13	8.82482e-12	20.959
242975_s_at	---	---	---	2.1506	7.00674	12.2554	7.14418e-12	2.27587e-10	17.0077
243855_at	---	---	---	2.15002	7.14103	10.0382	4.16005e-10	7.18682e-09	12.8541
212655_at	ZCCHC14	zinc finger, CCHC domain containing 14	23174	2.14841	7.88297	11.9927	1.12402e-11	3.37348e-10	16.5448
232304_at	PELI1	Pellino homolog 1 (Drosophila)	57162	2.14752	6.68652	12.2088	7.73808e-12	2.42957e-10	16.9261
242539_at	LOC731484	hypothetical LOC731484	731484	2.14645	6.90185	8.44348	1.11776e-08	1.25529e-07	9.49186
1557300_s_at	---	---	---	2.14645	6.669	13.0732	1.82183e-12	7.38153e-11	18.4027
209630_s_at	FBXW2	F-box and WD repeat domain containing 2	26190	2.14268	7.83225	10.8714	8.45794e-11	1.86182e-09	14.4824
217317_s_at	HERC2P2 /// HERC2P3 /// LOC440248	hect domain and RLD 2 pseudogene 2 /// hect domain and RLD 2 pseudogene 3 /// hect domain and RLD 2 pseudogene	283755 /// 400322 /// 440248	2.14194	9.78531	16.5061	1.11755e-14	9.69204e-13	23.5877
233037_at	---	---	---	2.14175	6.02916	10.6972	1.17211e-10	2.45708e-09	14.1489
208988_at	KDM2A	lysine (K)-specific demethylase 2A	22992	2.14147	8.78175	12.8084	2.81515e-12	1.06569e-10	17.9585
1559156_at	---	---	---	2.14117	7.38686	11.9276	1.25898e-11	3.72253e-10	16.4289
226571_s_at	PTPRS	protein tyrosine phosphatase, receptor type, S	5802	2.1402	8.58499	13.8795	5.04106e-13	2.50787e-11	19.7131
222371_at	---	---	---	2.1401	7.67891	12.1818	8.10526e-12	2.52314e-10	16.8788
235564_at	ZNF117	Zinc finger protein 117	51351	2.14007	6.37528	10.5756	1.47496e-10	2.98572e-09	13.914
218131_s_at	GATAD2A	GATA zinc finger domain containing 2A	54815	2.13924	8.80932	12.3091	6.5175e-12	2.11824e-10	17.1014
202761_s_at	SYNE2	spectrin repeat containing, nuclear envelope 2	23224	2.13918	8.98937	9.02375	3.24895e-09	4.30939e-08	10.7536
226213_at	ERBB3	v-erb-b2 erythroblastic leukemia viral oncogene homolog 3 (avian)	2065	2.13913	8.66116	11.4171	3.11281e-11	7.97611e-10	15.504
1556595_at	---	---	---	2.13876	5.93887	7.07337	2.46734e-07	1.88733e-06	6.33805
1558759_s_at	CLASP2	cytoplasmic linker associated protein 2	23122	2.13567	6.27437	11.6708	1.9782e-11	5.41675e-10	15.9672
229773_at	SNAP23	Synaptosomal-associated protein, 23kDa	8773	2.13444	6.07845	13.4589	9.77996e-13	4.38762e-11	19.0373
242787_at	---	---	---	2.13235	6.85572	11.8191	1.52245e-11	4.3431e-10	16.2348
1553292_s_at	FLJ25006	uncharacterized serine/threonine-protein kinase SgK494	124923	2.12749	6.26591	12.111	9.15687e-12	2.80338e-10	16.7542
221480_at	HNRNPD	heterogeneous nuclear ribonucleoprotein D (AU-rich element RNA binding protein 1, 37kDa)	3184	2.12746	8.32851	15.161	7.34715e-14	4.8851e-12	21.6743
241774_at	---	---	---	2.12696	5.97517	10.2179	2.92966e-10	5.33356e-09	13.2125
228487_s_at	---	---	---	2.12476	6.5102	12.1028	9.28648e-12	2.83303e-10	16.7398
214745_at	PLCH1	phospholipase C, eta 1	23007	2.12359	7.57958	12.4614	5.03209e-12	1.71019e-10	17.3656
229949_at	---	---	---	2.12335	9.21296	14.17	3.21847e-13	1.7351e-11	20.1704
209153_s_at	TCF3	transcription factor 3 (E2A immunoglobulin enhancer binding factors E12/E47)	6929	2.12332	8.67208	10.7755	1.01175e-10	2.16645e-09	14.2993
244007_at	ZNF462	zinc finger protein 462	58499	2.12328	8.74942	12.0299	1.05365e-11	3.177e-10	16.6108
205251_at	PER2	period homolog 2 (Drosophila)	8864	2.1231	7.05699	11.005	6.60113e-11	1.50525e-09	14.7357
242918_at	NASP	Nuclear autoantigenic sperm protein (histone-binding)	4678	2.12148	8.42132	8.72305	6.12921e-09	7.47584e-08	10.1053
226715_at	FOXK1	forkhead box K1	221937	2.12035	6.9604	13.1226	1.68101e-12	6.90811e-11	18.4848
242346_x_at	---	---	---	2.11929	8.22403	8.50596	9.76438e-09	1.11444e-07	9.62985
221139_s_at	CSAD	cysteine sulfinic acid decarboxylase	51380	2.11481	7.03853	10.1393	3.41382e-10	6.07993e-09	13.0561
219990_at	E2F8	E2F transcription factor 8	79733	2.11385	7.12641	10.4135	2.00905e-10	3.8676e-09	13.5981
213390_at	ZC3H4	zinc finger CCCH-type containing 4	23211	2.11348	9.38916	16.7031	8.57419e-15	7.66834e-13	23.8565
238970_at	---	---	---	2.11097	6.6963	7.29475	1.4718e-07	1.20054e-06	6.86379
235094_at	---	---	---	2.11076	8.16911	14.006	4.14249e-13	2.14409e-11	19.9132
218330_s_at	NAV2	neuron navigator 2	89797	2.10652	10.0256	17.8227	1.99686e-15	2.23192e-13	25.3326
232835_at	---	---	---	2.10629	7.62482	15.2962	6.04333e-14	4.10235e-12	21.8731
216623_x_at	TOX3	TOX high mobility group box family member 3	27324	2.10332	8.96894	11.1053	5.48795e-11	1.28902e-09	14.9245
223189_x_at	MLL5	myeloid/lymphoid or mixed-lineage leukemia 5 (trithorax homolog, Drosophila)	55904	2.1017	8.74141	9.98464	4.6219e-10	7.84875e-09	12.7464
239811_at	---	---	---	2.09958	6.81872	7.28541	1.50403e-07	1.22222e-06	6.84174
241755_at	UQCRC2	ubiquinol-cytochrome c reductase core protein II	7385	2.09793	5.95833	9.79421	6.73948e-10	1.09568e-08	12.3609
203666_at	CXCL12	chemokine (C-X-C motif) ligand 12 (stromal cell-derived factor 1)	6387	2.09702	7.12274	13.7404	6.26561e-13	3.03471e-11	19.4914
231969_at	STOX2	storkhead box 2	56977	2.09639	9.18548	13.5324	8.70049e-13	3.97905e-11	19.1566
232921_at	KIAA1549	KIAA1549	57670	2.09581	6.82865	10.4218	1.97726e-10	3.81491e-09	13.6144
243792_x_at	PTPN13	Protein tyrosine phosphatase, non-receptor type 13 (APO-1/CD95 (Fas)-associated phosphatase)	5783	2.09419	7.00007	7.41815	1.10654e-07	9.34645e-07	7.15423
226052_at	BRD4	bromodomain containing 4	23476	2.09117	7.25388	12.7375	3.16691e-12	1.1665e-10	17.8383
212178_s_at	POM121 /// POM121C	POM121 membrane glycoprotein (rat) /// POM121 membrane glycoprotein C	100101267 /// 9883	2.09105	8.40934	12.4667	4.98699e-12	1.69708e-10	17.3747
209392_at	ENPP2	ectonucleotide pyrophosphatase/phosphodiesterase 2	5168	2.08806	8.73742	12.7354	3.17823e-12	1.169e-10	17.8347
210282_at	ZMYM2	zinc finger, MYM-type 2	7750	2.08765	7.56362	10.2966	2.51586e-10	4.69343e-09	13.3681
214774_x_at	TOX3	TOX high mobility group box family member 3	27324	2.08371	9.12932	8.98426	3.52894e-09	4.62867e-08	10.6692
228377_at	KLHL14	kelch-like 14 (Drosophila)	57565	2.08357	6.13472	11.6252	2.14506e-11	5.79413e-10	15.8845
225368_at	HIPK2	homeodomain interacting protein kinase 2	28996	2.07907	9.38575	14.9049	1.06808e-13	6.67382e-12	21.2937
225762_x_at	LOC284801	hypothetical protein LOC284801	284801	2.07738	6.70758	9.77647	6.98212e-10	1.12947e-08	12.3248
239780_at	---	---	---	2.07658	7.3965	13.9101	4.80653e-13	2.42016e-11	19.7616
215108_x_at	TOX3	TOX high mobility group box family member 3	27324	2.07525	8.86255	10.0283	4.24153e-10	7.30326e-09	12.8342
242801_at	---	---	---	2.07481	6.56263	12.7015	3.36254e-12	1.22636e-10	17.7772
218820_at	C14orf132	chromosome 14 open reading frame 132	56967	2.07326	9.45568	15.2551	6.41217e-14	4.33005e-12	21.8128
228711_at	ZNF37A	zinc finger protein 37A	7587	2.06968	6.66701	12.5966	4.00724e-12	1.4254e-10	17.5981
219673_at	MCM9	minichromosome maintenance complex component 9	254394	2.06812	6.48798	12.4137	5.45475e-12	1.82985e-10	17.2832
225821_s_at	BOD1L	biorientation of chromosomes in cell division 1-like	259282	2.06609	8.78433	12.913	2.36867e-12	9.22809e-11	18.1348
232312_at	SAPS3	SAPS domain family, member 3	55291	2.06538	7.35056	11.5522	2.44296e-11	6.48396e-10	15.7516
215646_s_at	VCAN	versican	1462	2.06508	10.0718	9.21022	2.20481e-09	3.06886e-08	11.1497
213212_x_at	FLJ40113 /// LOC440295	golgi autoantigen, golgin subfamily a-like pseudogene /// hypothetical protein LOC440295	374650 /// 440295	2.06485	8.9367	7.23396	1.69509e-07	1.35706e-06	6.72002
232116_at	GRHL3	grainyhead-like 3 (Drosophila)	57822	2.06453	7.17385	9.08112	2.88225e-09	3.87052e-08	10.876
225239_at	---	---	---	2.06446	7.92973	12.8367	2.68643e-12	1.02444e-10	18.0063
202102_s_at	BRD4	bromodomain containing 4	23476	2.06437	8.98301	12.1695	8.27895e-12	2.56796e-10	16.8571
203148_s_at	TRIM14	tripartite motif-containing 14	9830	2.06417	6.39808	7.95269	3.29121e-08	3.21206e-07	8.38999
230875_s_at	ATP11A	ATPase, class VI, type 11A	23250	2.06367	8.04552	7.78987	4.74258e-08	4.4333e-07	8.0175
239014_at	CCAR1	Cell division cycle and apoptosis regulator 1	55749	2.06364	6.79344	9.0409	3.13452e-09	4.16613e-08	10.7902
238520_at	TRERF1	transcriptional regulating factor 1	55809	2.0616	6.57439	11.5245	2.56712e-11	6.75412e-10	15.701
241749_at	MURC	muscle-related coiled-coil protein	347273	2.06099	6.27238	10.5463	1.55926e-10	3.13192e-09	13.8572
234224_at	---	---	---	2.06	6.03559	10.4009	2.05839e-10	3.94794e-09	13.5733
233036_at	---	---	---	2.05977	7.2384	10.6863	1.1964e-10	2.4979e-09	14.1279
204403_x_at	FAM115A	family with sequence similarity 115, member A	9747	2.05938	8.2176	9.09446	2.80328e-09	3.7821e-08	10.9043
242054_s_at	---	---	---	2.05918	5.97687	10.1446	3.37832e-10	6.02769e-09	13.0668
228340_at	TLE3	transducin-like enhancer of split 3 (E(sp1) homolog, Drosophila)	7090	2.05856	6.65555	10.6693	1.2352e-10	2.55627e-09	14.0953
232307_at	---	---	---	2.05698	6.90498	12.8389	2.6765e-12	1.02216e-10	18.0101
243286_at	---	---	---	2.05584	7.27728	13.2914	1.27916e-12	5.56542e-11	18.7635
1558522_at	---	---	---	2.05473	6.55038	11.847	1.44981e-11	4.17977e-10	16.2847
215574_at	---	---	---	2.05429	7.20695	10.6834	1.20295e-10	2.50754e-09	14.1223
236835_at	LOC645431	hypothetical LOC645431	645431	2.05325	5.90567	12.179	8.14486e-12	2.53242e-10	16.8738
214870_x_at	LOC339047	hypothetical protein LOC339047	339047	2.05293	9.01436	16.8984	6.6108e-15	6.18861e-13	24.1202
232597_x_at	SFRS2IP	splicing factor, arginine/serine-rich 2, interacting protein	9169	2.05217	8.09754	11.8489	1.44477e-11	4.17664e-10	16.2883
207060_at	EN2	engrailed homeobox 2	2020	2.05165	6.82302	9.01503	3.30874e-09	4.37526e-08	10.735
207856_s_at	LOC150776 /// SMPD4	sphingomyelin phosphodiesterase 4, neutral membrane pseudogene /// sphingomyelin phosphodiesterase 4, neutral membrane (neutral sphingomyelinase-3)	150776 /// 55627	2.05136	7.79394	13.1375	1.64066e-12	6.79614e-11	18.5095
204520_x_at	BRD1	bromodomain containing 1	23774	2.0513	7.74257	12.5347	4.44675e-12	1.54569e-10	17.4918
1556035_s_at	ZNF207	zinc finger protein 207	7756	2.05129	8.02085	16.9922	5.83985e-15	5.58794e-13	24.2459
221245_s_at	FZD5	frizzled homolog 5 (Drosophila)	7855	2.0502	7.85739	12.6519	3.65268e-12	1.32103e-10	17.6927
235542_at	TET3	tet oncogene family member 3	200424	2.04979	8.04816	13.182	1.5264e-12	6.41507e-11	18.5832
213308_at	SHANK2	SH3 and multiple ankyrin repeat domains 2	22941	2.04932	7.17104	12.1162	9.07451e-12	2.78146e-10	16.7634
200072_s_at	HNRNPM	heterogeneous nuclear ribonucleoprotein M	4670	2.04893	10.8805	11.5622	2.39989e-11	6.38273e-10	15.7698
210891_s_at	GTF2I /// GTF2IP1 /// LOC100093631	general transcription factor II, i /// general transcription factor II, i, pseudogene 1 /// general transcription factor II, i, pseudogene	100093631 /// 2969 /// 2970	2.04878	11.6856	14.1649	3.24376e-13	1.7451e-11	20.1624
226176_s_at	USP42	ubiquitin specific peptidase 42	84132	2.04684	6.78504	7.69263	5.90883e-08	5.39744e-07	7.79339
227335_at	DIDO1	death inducer-obliterator 1	11083	2.04668	7.22384	12.128	8.89245e-12	2.7386e-10	16.7841
241786_at	---	---	---	2.04629	6.13659	10.4442	1.89445e-10	3.68529e-09	13.6581
1553693_s_at	CBR4	carbonyl reductase 4	84869	2.04549	7.80988	11.7072	1.8546e-11	5.11614e-10	16.0332
220305_at	MAVS	mitochondrial antiviral signaling protein	57506	2.04369	6.79576	11.1425	5.12571e-11	1.21605e-09	14.9943
241724_x_at	---	---	---	2.04321	9.62749	10.993	6.74908e-11	1.53223e-09	14.7131
213338_at	TMEM158	transmembrane protein 158	25907	2.04282	8.44123	11.569	2.37076e-11	6.31822e-10	15.7823
229422_at	NRD1	nardilysin (N-arginine dibasic convertase)	4898	2.04225	7.56162	10.6948	1.17738e-10	2.46413e-09	14.1443
213720_s_at	SMARCA4	SWI/SNF related, matrix associated, actin dependent regulator of chromatin, subfamily a, member 4	6597	2.04195	9.54198	15.6411	3.69469e-14	2.75308e-12	22.3733
236462_at	---	---	---	2.0415	6.85752	13.0896	1.77379e-12	7.22074e-11	18.4299
213703_at	LOC150759	hypothetical protein LOC150759	150759	2.04141	6.35759	10.1033	3.66179e-10	6.45067e-09	12.9845
212556_at	SCRIB	scribbled homolog (Drosophila)	23513	2.03832	8.61472	16.1276	1.8734e-14	1.50867e-12	23.0633
224837_at	FOXP1	forkhead box P1	27086	2.03763	8.72499	14.8943	1.08492e-13	6.76272e-12	21.2777
232264_at	---	---	---	2.03602	7.21015	9.46023	1.32037e-09	1.95425e-08	11.6736
239243_at	ZNF638	Zinc finger protein 638	27332	2.0343	7.20699	10.0507	4.05957e-10	7.06226e-09	12.879
230494_at	SLC20A1	Solute carrier family 20 (phosphate transporter), member 1	6574	2.03335	7.01484	9.76797	7.10146e-10	1.14663e-08	12.3075
232469_x_at	chromosome 1 open reading frame 191	CDNA FLJ13821 fis, clone THYRO1000484	---	2.03273	6.78415	9.01134	3.3344e-09	4.4047e-08	10.7271
202219_at	SLC6A8	solute carrier family 6 (neurotransmitter transporter, creatine), member 8	6535	2.0315	7.82221	12.3525	6.05265e-12	1.99177e-10	17.177
229765_at	ZNF207	zinc finger protein 207	7756	2.03087	8.13067	9.10629	2.73509e-09	3.69779e-08	10.9295
225224_at	C20orf112	chromosome 20 open reading frame 112	140688	2.03025	8.23107	15.6818	3.4879e-14	2.63687e-12	22.4319
242476_at	---	---	---	2.03017	6.73202	9.98316	4.63536e-10	7.86646e-09	12.7435
201935_s_at	EIF4G3	eukaryotic translation initiation factor 4 gamma, 3	8672	2.02967	8.92562	11.8997	1.32189e-11	3.87758e-10	16.3791
240000_at	---	---	---	2.02926	6.1001	9.85755	5.94189e-10	9.80147e-09	12.4897
215623_x_at	SMC4	structural maintenance of chromosomes 4	10051	2.02818	6.27704	8.91926	4.04525e-09	5.21875e-08	10.5297
231407_s_at	FOXH1	forkhead box H1	8928	2.0269	7.49274	10.9926	6.75385e-11	1.53223e-09	14.7124
221919_at	HNRNPA1 /// LOC728844	heterogeneous nuclear ribonucleoprotein A1 /// hypothetical LOC728844	3178 /// 728844	2.02453	8.53822	9.04338	3.11832e-09	4.14885e-08	10.7955
235985_at	---	---	---	2.02399	7.18136	10.4259	1.96188e-10	3.79088e-09	13.6224
206157_at	PTX3	pentraxin-related gene, rapidly induced by IL-1 beta	5806	2.02396	8.02152	15.1418	7.55496e-14	4.99765e-12	21.646
229483_at	---	---	---	2.02171	6.64958	8.5667	8.56611e-09	9.92972e-08	9.76351
201773_at	ADNP	activity-dependent neuroprotector homeobox	23394	2.02164	9.95441	13.5824	8.03797e-13	3.70218e-11	19.2374
229141_at	WDR33	WD repeat domain 33	55339	2.02063	6.94897	9.37286	1.57802e-09	2.28346e-08	11.4915
236181_at	LOC100132181	Hypothetical protein LOC100132181	100132181	2.02035	8.02594	9.53264	1.13984e-09	1.72296e-08	11.8239
235493_at	---	---	---	2.0169	7.15645	8.69604	6.49269e-09	7.8585e-08	10.0465
235347_at	LRCH3	leucine-rich repeats and calponin homology (CH) domain containing 3	84859	2.01569	6.96835	10.6571	1.26397e-10	2.60748e-09	14.0718
228915_at	DACH1	dachshund homolog 1 (Drosophila)	1602	2.01416	8.71199	14.7818	1.28097e-13	7.78441e-12	21.1087
209106_at	NCOA1	nuclear receptor coactivator 1	8648	2.01327	7.83426	11.1783	4.80115e-11	1.15117e-09	15.0612
222111_at	---	---	---	2.01228	7.04549	8.7071	6.34125e-09	7.69467e-08	10.0706
208937_s_at	ID1	inhibitor of DNA binding 1, dominant negative helix-loop-helix protein	3397	2.01163	10.6538	12.814	2.78911e-12	1.05737e-10	17.968
238519_at	RSC1A1	regulatory solute carrier protein, family 1, member 1	6248	2.01158	6.90154	11.6813	1.94151e-11	5.33319e-10	15.9864
201976_s_at	MYO10	myosin X	4651	2.0107	9.52104	13.754	6.13252e-13	2.9953e-11	19.5133
213517_at	PCBP2	poly(rC) binding protein 2	5094	2.01052	8.86849	10.0907	3.75308e-10	6.59804e-09	12.9593
1556818_at	---	---	---	2.00973	7.14799	9.17995	2.3473e-09	3.23937e-08	11.0857
1557828_a_at	C5orf28	Chromosome 5 open reading frame 28	64417	2.00911	6.11259	10.6712	1.23083e-10	2.5513e-09	14.0989
215204_at	---	---	---	2.00867	6.28257	9.56915	1.05869e-09	1.61868e-08	11.8993
81811_at	---	---	---	2.00758	7.61547	13.5854	7.99918e-13	3.69087e-11	19.2423
217526_at	NFATC2IP	nuclear factor of activated T-cells, cytoplasmic, calcineurin-dependent 2 interacting protein	84901	2.00711	8.57988	13.9227	4.71294e-13	2.37765e-11	19.7817
224765_at	MSL1	male-specific lethal 1 homolog (Drosophila)	339287	2.00707	10.1088	14.7755	1.29294e-13	7.81519e-12	21.0992
200940_s_at	RERE	arginine-glutamic acid dipeptide (RE) repeats	473	2.00579	8.87486	13.1124	1.7092e-12	6.99073e-11	18.4678
228894_at	LOC253842 /// NR6A1	hypothetical protein LOC253842 /// nuclear receptor subfamily 6, group A, member 1	253842 /// 2649	2.00523	9.39424	11.7345	1.76726e-11	4.9065e-10	16.0825
230889_at	---	---	---	2.00487	7.31889	9.52435	1.15917e-09	1.7486e-08	11.8067
238538_at	ANKRD11	ankyrin repeat domain 11	29123	2.0034	8.42301	11.6543	2.03705e-11	5.5486e-10	15.9373
222243_s_at	TOB2	transducer of ERBB2, 2	10766	2.00246	8.62703	11.4905	2.72795e-11	7.09514e-10	15.6389
1555882_at	SPIN3	spindlin family, member 3	169981	2.00148	6.66822	11.0094	6.54817e-11	1.49736e-09	14.744
229687_s_at	---	---	---	2.00099	6.16014	9.2634	1.97567e-09	2.79493e-08	11.2618
225181_at	ARID1B /// LOC729446	AT rich interactive domain 1B (SWI1-like) /// hypothetical LOC729446	57492 /// 729446	2.00088	8.88995	9.1966	2.2678e-09	3.14346e-08	11.1209
217762_s_at	RAB31	RAB31, member RAS oncogene family	11031	-2.0077	8.43502	-14.3725	2.36429e-13	1.32415e-11	20.4846
200983_x_at	CD59	CD59 molecule, complement regulatory protein	966	-2.00904	9.23985	-13.558	8.35356e-13	3.83391e-11	19.1981
213061_s_at	NTAN1	N-terminal asparagine amidase	123803	-2.00943	8.28825	-9.70365	8.07643e-10	1.27779e-08	12.176
223159_s_at	NEK6	NIMA (never in mitosis gene a)-related kinase 6	10783	-2.00982	6.30179	-11.0628	5.93339e-11	1.37743e-09	14.8447
228555_at	CAMK2D	calcium/calmodulin-dependent protein kinase II delta	817	-2.01036	7.60726	-10.7854	9.93031e-11	2.13341e-09	14.3184
225912_at	TP53INP1	tumor protein p53 inducible nuclear protein 1	94241	-2.01223	9.17681	-14.6099	1.65422e-13	9.69575e-12	20.8483
205743_at	STAC	SH3 and cysteine rich domain	6769	-2.01224	7.1602	-10.5094	1.67262e-10	3.32104e-09	13.7854
226050_at	TMCO3	transmembrane and coiled-coil domains 3	55002	-2.01331	9.08321	-13.1662	1.56608e-12	6.53944e-11	18.557
209513_s_at	HSDL2	hydroxysteroid dehydrogenase like 2	84263	-2.01509	8.57527	-10.7228	1.11691e-10	2.35851e-09	14.1982
218403_at	TRIAP1	TP53 regulated inhibitor of apoptosis 1	51499	-2.01515	10.2058	-14.0262	4.01511e-13	2.10047e-11	19.945
238018_at	FAM150B	family with sequence similarity 150, member B	285016	-2.01674	5.04877	-11.8222	1.5143e-11	4.3383e-10	16.2403
209276_s_at	GLRX	glutaredoxin (thioltransferase)	2745	-2.01761	8.60795	-11.0648	5.91229e-11	1.37376e-09	14.8484
238599_at	IRAK1BP1	interleukin-1 receptor-associated kinase 1 binding protein 1	134728	-2.01823	7.42357	-9.09084	2.82447e-09	3.80474e-08	10.8966
209835_x_at	CD44	CD44 molecule (Indian blood group)	960	-2.02042	6.36505	-13.6839	6.84762e-13	3.25212e-11	19.4008
242387_at	C8orf42	chromosome 8 open reading frame 42	157695	-2.02222	6.48963	-12.2952	6.67318e-12	2.16303e-10	17.0773
227466_at	LOC285550	hypothetical protein LOC285550	285550	-2.02233	8.90969	-10.7523	1.05678e-10	2.2425e-09	14.2548
236600_at	SPG20	spastic paraplegia 20 (Troyer syndrome)	23111	-2.02258	6.32439	-10.4676	1.81168e-10	3.5592e-09	13.7038
1555240_s_at	GNG12	guanine nucleotide binding protein (G protein), gamma 12	55970	-2.02375	7.16533	-10.5938	1.42487e-10	2.88658e-09	13.9493
202660_at	ITPR2	inositol 1,4,5-triphosphate receptor, type 2	3709	-2.02441	6.27529	-8.28993	1.56165e-08	1.67404e-07	9.15054
224724_at	SULF2	sulfatase 2	55959	-2.02572	8.42573	-12.0726	9.78483e-12	2.97806e-10	16.6864
229978_at	LOC729993	hypothetical protein LOC729993	729993	-2.02577	7.20687	-11.7274	1.78966e-11	4.96338e-10	16.0696
227705_at	TCEAL7	transcription elongation factor A (SII)-like 7	56849	-2.02627	9.64363	-12.5949	4.01886e-12	1.42562e-10	17.5951
227084_at	DTNA	dystrobrevin, alpha	1837	-2.02749	7.62659	-15.77	3.08089e-14	2.34972e-12	22.558
208370_s_at	RCAN1	regulator of calcineurin 1	1827	-2.03078	7.58569	-12.1071	9.21766e-12	2.81867e-10	16.7474
205531_s_at	GLS2	glutaminase 2 (liver, mitochondrial)	27165	-2.03106	5.69458	-11.4298	3.04234e-11	7.82648e-10	15.5274
214452_at	BCAT1	branched chain aminotransferase 1, cytosolic	586	-2.03506	7.16062	-9.97303	4.72878e-10	7.99362e-09	12.7231
227917_at	FAM85A	family with sequence similarity 85, member A	619423	-2.03564	8.79823	-14.6042	1.66843e-13	9.74415e-12	20.8396
213616_at	C18orf10	chromosome 18 open reading frame 10	25941	-2.03707	7.35325	-10.2788	2.60391e-10	4.82991e-09	13.333
214369_s_at	RASGRP2	RAS guanyl releasing protein 2 (calcium and DAG-regulated)	10235	-2.03852	5.99982	-11.1404	5.14524e-11	1.21846e-09	14.9904
204017_at	KDELR3	KDEL (Lys-Asp-Glu-Leu) endoplasmic reticulum protein retention receptor 3	11015	-2.03977	8.34838	-12.4556	5.0813e-12	1.72465e-10	17.3556
218073_s_at	TMEM48	transmembrane protein 48	55706	-2.04025	6.40323	-10.0494	4.06982e-10	7.07072e-09	12.8765
203560_at	GGH	gamma-glutamyl hydrolase (conjugase, folylpolygammaglutamyl hydrolase)	8836	-2.04473	9.76395	-12.7292	3.21094e-12	1.17769e-10	17.8242
233002_at	PPP4R4	protein phosphatase 4, regulatory subunit 4	57718	-2.0453	5.36802	-7.91372	3.59079e-08	3.4666e-07	8.30115
219412_at	RAB38	RAB38, member RAS oncogene family	23682	-2.04568	8.46252	-15.5922	3.95914e-14	2.9166e-12	22.3031
225464_at	FRMD6	FERM domain containing 6	122786	-2.04772	8.39404	-14.0171	4.07232e-13	2.12126e-11	19.9306
204489_s_at	CD44	CD44 molecule (Indian blood group)	960	-2.04959	6.46289	-6.68308	6.22798e-07	4.23495e-06	5.39697
220122_at	MCTP1	multiple C2 domains, transmembrane 1	79772	-2.05213	5.57571	-10.9752	6.97492e-11	1.57962e-09	14.6794
206247_at	MICB	MHC class I polypeptide-related sequence B	4277	-2.05253	6.77174	-7.0816	2.42016e-07	1.85398e-06	6.35769
208851_s_at	THY1	Thy-1 cell surface antigen	7070	-2.05494	7.9048	-12.5504	4.33019e-12	1.5137e-10	17.5189
211474_s_at	SERPINB6	serpin peptidase inhibitor, clade B (ovalbumin), member 6	5269	-2.05652	8.36527	-12.9751	2.13878e-12	8.49321e-11	18.239
242669_at	UFM1	Ubiquitin-fold modifier 1	51569	-2.05656	7.19871	-9.0412	3.13257e-09	4.16568e-08	10.7909
225734_at	FBXO22	F-box protein 22	26263	-2.06275	8.47354	-11.9402	1.23165e-11	3.65421e-10	16.4513
204348_s_at	AK3L1	adenylate kinase 3-like 1	205	-2.06327	8.85865	-18.2222	1.2101e-15	1.48717e-13	25.8391
212526_at	SPG20	spastic paraplegia 20 (Troyer syndrome)	23111	-2.06519	9.18981	-10.4264	1.95998e-10	3.79002e-09	13.6233
209191_at	TUBB6	tubulin, beta 6	84617	-2.06966	9.93998	-18.1177	1.37816e-15	1.63931e-13	25.7076
229228_at	CREB5	cAMP responsive element binding protein 5	9586	-2.06984	6.3638	-7.68953	5.9506e-08	5.42373e-07	7.78621
36711_at	MAFF	v-maf musculoaponeurotic fibrosarcoma oncogene homolog F (avian)	23764	-2.06988	6.28038	-7.57419	7.73644e-08	6.83521e-07	7.51877
205637_s_at	SH3GL3	SH3-domain GRB2-like 3	6457	-2.07004	8.33944	-17.9769	1.64396e-15	1.9031e-13	25.5293
210665_at	TFPI	tissue factor pathway inhibitor (lipoprotein-associated coagulation inhibitor)	7035	-2.07046	7.4382	-13.4273	1.02858e-12	4.58286e-11	18.9859
222408_s_at	YPEL5	yippee-like 5 (Drosophila)	51646	-2.07188	9.0692	-16.545	1.06031e-14	9.25751e-13	23.641
205659_at	HDAC9	histone deacetylase 9	9734	-2.07385	7.33555	-12.2087	7.7391e-12	2.42957e-10	16.926
226546_at	---	---	---	-2.07567	8.17631	-11.8568	1.42502e-11	4.12874e-10	16.3024
213062_at	NTAN1	N-terminal asparagine amidase	123803	-2.07707	8.4792	-12.8933	2.44697e-12	9.49887e-11	18.1016
201615_x_at	CALD1	caldesmon 1	800	-2.07879	9.30004	-9.28353	1.89546e-09	2.69469e-08	11.3042
227345_at	TNFRSF10D	tumor necrosis factor receptor superfamily, member 10d, decoy with truncated death domain	8793	-2.07926	6.71362	-12.8894	2.46277e-12	9.54591e-11	18.095
214211_at	FTH1	ferritin, heavy polypeptide 1	2495	-2.08403	9.24261	-15.7814	3.03174e-14	2.31906e-12	22.5743
201029_s_at	CD99	CD99 molecule	4267	-2.08688	10.803	-14.6474	1.56414e-13	9.26022e-12	20.9053
209087_x_at	MCAM	melanoma cell adhesion molecule	4162	-2.08799	6.41871	-13.2152	1.4465e-12	6.13075e-11	18.6381
1553928_at	ELMOD2	ELMO/CED-12 domain containing 2	255520	-2.0882	6.89131	-9.19741	2.26399e-09	3.14112e-08	11.1226
241353_s_at	LOC100129105	similar to hCG1821214	100129105	-2.09449	8.12569	-12.092	9.46143e-12	2.88301e-10	16.7207
211340_s_at	MCAM	melanoma cell adhesion molecule	4162	-2.09574	7.59006	-11.4743	2.80879e-11	7.27618e-10	15.609
201028_s_at	CD99	CD99 molecule	4267	-2.09775	8.30927	-10.9036	7.96521e-11	1.76837e-09	14.5438
212294_at	GNG12	guanine nucleotide binding protein (G protein), gamma 12	55970	-2.10038	9.3331	-16.0484	2.08989e-14	1.66747e-12	22.9522
221593_s_at	RPL31	ribosomal protein L31	6160	-2.10241	8.08562	-13.6949	6.7294e-13	3.20184e-11	19.4186
225331_at	CCDC50	coiled-coil domain containing 50	152137	-2.10309	9.01514	-13.5349	8.66621e-13	3.97038e-11	19.1606
222387_s_at	VPS35	vacuolar protein sorting 35 homolog (S. cerevisiae)	55737	-2.10573	7.64798	-9.14317	2.53329e-09	3.45558e-08	11.0078
238447_at	RBMS3	RNA binding motif, single stranded interacting protein	27303	-2.10608	6.66232	-11.7446	1.73606e-11	4.83024e-10	16.1007
209363_s_at	MED21	mediator complex subunit 21	9412	-2.11039	7.69941	-13.704	6.63398e-13	3.16333e-11	19.4331
209655_s_at	TMEM47	transmembrane protein 47	83604	-2.11072	8.80034	-12.7405	3.15093e-12	1.16226e-10	17.8435
212246_at	MCFD2	multiple coagulation factor deficiency 2	90411	-2.11149	7.61245	-11.4384	2.99557e-11	7.72918e-10	15.5432
221051_s_at	ITGB1BP3	integrin beta 1 binding protein 3	27231	-2.11193	6.46352	-10.3854	2.1203e-10	4.04574e-09	13.543
226671_at	LAMP2	lysosomal-associated membrane protein 2	3920	-2.11353	7.32719	-12.2827	6.81745e-12	2.20154e-10	17.0555
202558_s_at	HSPA13	heat shock protein 70kDa family, member 13	6782	-2.11442	7.95235	-13.8525	5.25716e-13	2.60656e-11	19.6703
206907_at	TNFSF9	tumor necrosis factor (ligand) superfamily, member 9	8744	-2.11604	5.42417	-10.5472	1.55664e-10	3.12909e-09	13.8589
229711_s_at	MDM2	Mdm2 p53 binding protein homolog (mouse)	4193	-2.11688	9.3098	-11.0309	6.29254e-11	1.45171e-09	14.7847
225275_at	EDIL3	EGF-like repeats and discoidin I-like domains 3	10085	-2.11725	10.3874	-15.8607	2.71326e-14	2.10652e-12	22.6871
217763_s_at	RAB31	RAB31, member RAS oncogene family	11031	-2.11884	8.62483	-11.1912	4.68903e-11	1.13108e-09	15.0853
227006_at	PPP1R14A	protein phosphatase 1, regulatory (inhibitor) subunit 14A	94274	-2.12007	6.33134	-9.8937	5.53096e-10	9.18303e-09	12.5629
226778_at	C8orf42	chromosome 8 open reading frame 42	157695	-2.12058	7.59098	-12.2607	7.07952e-12	2.25804e-10	17.0169
203336_s_at	ITGB1BP1	integrin beta 1 binding protein 1	9270	-2.12087	8.52608	-13.2537	1.35941e-12	5.83624e-11	18.7014
235759_at	---	---	---	-2.12122	7.91872	-12.2801	6.84835e-12	2.20876e-10	17.0509
204288_s_at	SORBS2	sorbin and SH3 domain containing 2	8470	-2.12127	6.99349	-8.57777	8.36457e-09	9.74401e-08	9.78782
204513_s_at	ELMO1	engulfment and cell motility 1	9844	-2.12174	7.21226	-14.1873	3.13462e-13	1.70406e-11	20.1973
228158_at	LOC645166 /// LOC654342	lymphocyte-specific protein 1 pseudogene /// lymphocyte-specific protein 1 pseudogene	645166 /// 654342	-2.12496	6.72455	-12.5306	4.47695e-12	1.55203e-10	17.4849
226281_at	DNER	delta/notch-like EGF repeat containing	92737	-2.12864	8.18809	-12.6813	3.47759e-12	1.26654e-10	17.7428
219014_at	PLAC8	placenta-specific 8	51316	-2.12958	6.29485	-10.1125	3.59671e-10	6.35288e-09	13.0028
212724_at	RND3	Rho family GTPase 3	390	-2.14126	10.7668	-18.2115	1.22629e-15	1.49995e-13	25.8256
217783_s_at	YPEL5	yippee-like 5 (Drosophila)	51646	-2.14693	9.62335	-14.4881	1.98567e-13	1.13917e-11	20.6624
236692_at	LOC729839	hypothetical LOC729839	729839	-2.15188	6.45287	-12.4904	4.79108e-12	1.64335e-10	17.4157
244340_x_at	---	---	---	-2.15253	6.92333	-11.9648	1.18e-11	3.50901e-10	16.4951
225737_s_at	FBXO22	F-box protein 22	26263	-2.15286	7.27156	-12.3037	6.57791e-12	2.13482e-10	17.092
226103_at	NEXN	nexilin (F actin binding protein)	91624	-2.15832	7.00246	-9.42401	1.42146e-09	2.08579e-08	11.5982
239823_at	---	---	---	-2.1606	4.72277	-10.2718	2.63939e-10	4.87826e-09	13.3191
224829_at	CPEB4	cytoplasmic polyadenylation element binding protein 4	80315	-2.1609	6.81969	-10.4923	1.72797e-10	3.41525e-09	13.7521
217764_s_at	RAB31	RAB31, member RAS oncogene family	11031	-2.16114	8.94425	-12.4776	4.89581e-12	1.67044e-10	17.3936
202686_s_at	AXL	AXL receptor tyrosine kinase	558	-2.16251	7.81039	-13.9861	4.27191e-13	2.19356e-11	19.8818
225812_at	C6orf225	chromosome 6 open reading frame 225	619208	-2.1632	8.34556	-16.6918	8.70424e-15	7.75635e-13	23.8412
219165_at	PDLIM2	PDZ and LIM domain 2 (mystique)	64236	-2.16443	7.42815	-11.7783	1.63574e-11	4.60047e-10	16.1615
237275_at	---	---	---	-2.16654	7.45357	-17.4111	3.38038e-15	3.54885e-13	24.7998
1552736_a_at	NETO1	neuropilin (NRP) and tolloid (TLL)-like 1	81832	-2.16688	5.90182	-11.3248	3.67778e-11	9.12617e-10	15.3336
213946_s_at	OBSL1	obscurin-like 1	23363	-2.16918	6.43757	-12.3855	5.72224e-12	1.90479e-10	17.2343
235696_at	---	---	---	-2.17021	8.32361	-12.3561	6.01607e-12	1.98256e-10	17.1832
219099_at	C12orf5	chromosome 12 open reading frame 5	57103	-2.17181	8.4903	-10.6225	1.34937e-10	2.76168e-09	14.0049
204517_at	PPIC	peptidylprolyl isomerase C (cyclophilin C)	5480	-2.18307	9.31822	-11.3938	3.24642e-11	8.21297e-10	15.4611
238533_at	EPHA7	EPH receptor A7	2045	-2.1875	7.28599	-11.413	3.13576e-11	7.99246e-10	15.4965
211241_at	ANXA2P3	annexin A2 pseudogene 3	305	-2.18947	7.32046	-8.32836	1.43584e-08	1.55461e-07	9.23626
210138_at	RGS20	regulator of G-protein signaling 20	8601	-2.19264	6.75259	-9.21417	2.18686e-09	3.05207e-08	11.158
223734_at	C4orf49	chromosome 4 open reading frame 49	84709	-2.19343	7.02576	-11.7474	1.72753e-11	4.81165e-10	16.1057
216044_x_at	FAM69A	family with sequence similarity 69, member A	388650	-2.19577	6.16919	-10.7065	1.15176e-10	2.42029e-09	14.1668
201823_s_at	RNF14	ring finger protein 14	9604	-2.20023	6.76277	-14.1731	3.20328e-13	1.7305e-11	20.1752
202506_at	SSFA2	sperm specific antigen 2	6744	-2.20971	8.09328	-12.3359	6.2265e-12	2.03606e-10	17.1481
225908_at	IAH1	isoamyl acetate-hydrolyzing esterase 1 homolog (S. cerevisiae)	285148	-2.21021	8.95593	-17.2918	3.94522e-15	3.99624e-13	24.6433
206552_s_at	TAC1	tachykinin, precursor 1	6863	-2.21445	7.31021	-11.8157	1.53151e-11	4.36412e-10	16.2287
209406_at	BAG2	BCL2-associated athanogene 2	9532	-2.21798	8.31518	-13.3121	1.23717e-12	5.41911e-11	18.7975
212157_at	SDC2	syndecan 2	6383	-2.21845	6.75955	-14.6181	1.63401e-13	9.65184e-12	20.8608
213689_x_at	FAM69A	family with sequence similarity 69, member A	388650	-2.21991	7.1567	-15.4074	5.15153e-14	3.62017e-12	22.0354
230903_s_at	C8orf42	chromosome 8 open reading frame 42	157695	-2.22245	8.64938	-16.3713	1.34177e-14	1.12237e-12	23.4021
236075_s_at	LOC100129673	similar to hCG2042915	100129673	-2.2263	9.08103	-15.7892	2.99913e-14	2.3009e-12	22.5853
203797_at	VSNL1	visinin-like 1	7447	-2.23583	8.03784	-9.51565	1.17979e-09	1.77146e-08	11.7887
218718_at	PDGFC	platelet derived growth factor C	56034	-2.23658	8.52757	-15.3033	5.98205e-14	4.07141e-12	21.8834
204112_s_at	HNMT	histamine N-methyltransferase	3176	-2.24155	7.98257	-15.2932	6.06984e-14	4.10958e-12	21.8686
226278_at	SVIP	small VCP/p97-interacting protein	258010	-2.25289	7.53727	-12.1198	9.01914e-12	2.77104e-10	16.7696
239058_at	---	---	---	-2.25329	6.05439	-11.8508	1.44014e-11	4.16788e-10	16.2916
238504_at	C6orf57	chromosome 6 open reading frame 57	135154	-2.25399	7.69585	-11.1741	4.83751e-11	1.15721e-09	15.0534
203186_s_at	S100A4	S100 calcium binding protein A4	6275	-2.25837	8.13914	-13.9523	4.50163e-13	2.27992e-11	19.8284
229302_at	TMEM178	transmembrane protein 178	130733	-2.25855	8.10318	-14.0419	3.91888e-13	2.06127e-11	19.9697
214830_at	SLC38A6	solute carrier family 38, member 6	145389	-2.2603	7.09448	-14.5045	1.93728e-13	1.11635e-11	20.6875
218346_s_at	SESN1	sestrin 1	27244	-2.26111	8.5753	-17.7257	2.25837e-15	2.49199e-13	25.2081
225809_at	DKFZP564O0823	DKFZP564O0823 protein	25849	-2.26253	7.75287	-11.34	3.57759e-11	8.92023e-10	15.3618
222477_s_at	TM7SF3	transmembrane 7 superfamily member 3	51768	-2.26567	8.92087	-15.0018	9.26581e-14	5.94732e-12	21.4383
1556128_a_at	RASGRF2	Ras protein-specific guanine nucleotide-releasing factor 2	5924	-2.27192	5.61411	-10.7654	1.03102e-10	2.19863e-09	14.28
202693_s_at	STK17A	serine/threonine kinase 17a	9263	-2.27366	7.76779	-11.8204	1.5191e-11	4.3383e-10	16.237
225019_at	CAMK2D	calcium/calmodulin-dependent protein kinase II delta	817	-2.27595	9.21842	-11.6246	2.14736e-11	5.79431e-10	15.8834
219863_at	HERC5	hect domain and RLD 5	51191	-2.27851	7.12379	-11.1576	4.98591e-11	1.18942e-09	15.0226
225314_at	OCIAD2	OCIA domain containing 2	132299	-2.27976	9.80601	-17.2586	4.11917e-15	4.10824e-13	24.5996
218193_s_at	GOLT1B	golgi transport 1 homolog B (S. cerevisiae)	51026	-2.28091	7.51361	-15.7594	3.12712e-14	2.37799e-12	22.5428
222455_s_at	PARVA	parvin, alpha	55742	-2.2938	6.44077	-9.16837	2.40429e-09	3.29872e-08	11.0612
218769_s_at	ANKRA2	ankyrin repeat, family A (RFXANK-like), 2	57763	-2.30193	8.31087	-10.0895	3.76197e-10	6.6092e-09	12.9569
214073_at	CTTN	cortactin	2017	-2.30215	6.37688	-12.1648	8.34615e-12	2.58263e-10	16.8488
221916_at	NEFL	neurofilament, light polypeptide	4747	-2.3047	10.3817	-15.389	5.28947e-14	3.70706e-12	22.0085
219551_at	EAF2	ELL associated factor 2	55840	-2.30992	5.56003	-12.503	4.69074e-12	1.61749e-10	17.4373
217728_at	S100A6	S100 calcium binding protein A6	6277	-2.31361	8.3976	-14.0132	4.09684e-13	2.1247e-11	19.9245
201847_at	LIPA	lipase A, lysosomal acid, cholesterol esterase	3988	-2.31747	8.3535	-20.5386	7.91073e-17	1.4345e-14	28.5879
212646_at	RFTN1	raftlin, lipid raft linker 1	23180	-2.319	7.57767	-11.5087	2.64044e-11	6.91608e-10	15.6722
221605_s_at	PIPOX	pipecolic acid oxidase	51268	-2.32032	6.43688	-11.9084	1.3019e-11	3.83196e-10	16.3947
225728_at	SORBS2	sorbin and SH3 domain containing 2	8470	-2.33708	7.5242	-15.8426	2.78297e-14	2.15419e-12	22.6613
227221_at	---	---	---	-2.33956	6.9881	-12.8244	2.74184e-12	1.04403e-10	17.9855
206456_at	GABRA5	gamma-aminobutyric acid (GABA) A receptor, alpha 5	2558	-2.34308	4.73151	-9.56336	1.07116e-09	1.63198e-08	11.8874
214823_at	ZNF204	zinc finger protein 204 pseudogene	7754	-2.34583	7.07006	-11.7944	1.59017e-11	4.4967e-10	16.1903
[truncated: 260 more rows]

## Sheet: Table S2D_Day06-Day00
Probe ID	Gene Symbol	Gene Title	Entrez Gene ID	Linear Fold change	AveExpr	t	P.Value	adj.P.Val	B
[truncated: 2,055 more rows]

[truncated: 5 more sheets: Table S2E_Day09-Day00, Table S2F_Day12-Day00, Table S2G_Day15-Day00, Table S2H_Day18-Day00, Table S2I_Day21-Day00]
