# Supplementary material for: Identification of Thalidomide-Specific Transcriptomics and Proteomics Signatures during Differentiation of Human Embryonic Stem Cells
Source: PLoS One. 2012 Aug 28;7(8):e44228. doi: 10.1371/journal.pone.0044228 (PMC3429450; doi:10.1371/journal.pone.0044228)
Supplement: Table S3 — A to F) The T-statistics output for dose-response analysis. G) The F-statistics output for the dose-response analysis. (XLS) [file pone.0044228.s007.xls]

## Sheet: Table S3A_14 Day old EBs
Probe Set ID	Gene Symbol	Gene Title	Entrez Gene ID	Linear Fold change	t	P.Value	adj.P.Val
1559280_a_at	---	---	---	-149.561	-73.9779	1.46e-26	3.13e-23
230195_at	LOC100131138	similar to hCG2040918	100131138	-111.085	-77.793	5.17e-27	1.94e-23
231381_at	HESRG	hypothetical LOC790952	790952	-82.2063	-53.8155	1.02e-23	8.87e-21
237911_at	---	---	---	-73.0598	-78.3534	4.46e-27	1.94e-23
213293_s_at	TRIM22	tripartite motif-containing 22	10346	-69.3203	-57.8026	2.35e-24	2.61e-21
214974_x_at	CXCL5	chemokine (C-X-C motif) ligand 5	6374	-55.2417	-51.8063	2.23e-23	1.63e-20
224048_at	USP44	ubiquitin specific peptidase 44	84101	-48.9274	-25.5179	4.07e-17	3.2e-15
231061_at	---	---	---	-45.2633	-28.8377	3.46e-18	3.7e-16
1569023_a_at	---	---	---	-45.1068	-57.9589	2.22e-24	2.55e-21
243610_at	C9orf135	chromosome 9 open reading frame 135	138255	-41.0882	-44.2403	5.68e-22	2.51e-19
205603_s_at	DIAPH2	diaphanous homolog 2 (Drosophila)	1730	-38.6926	-30.4268	1.17e-18	1.44e-16
237193_s_at	---	---	---	-37.4574	-62.6232	4.51e-25	7.27e-22
206653_at	POLR3G	polymerase (RNA) III (DNA directed) polypeptide G (32kD)	10622	-36.9564	-39.8824	4.74e-21	1.43e-18
201012_at	ANXA1	annexin A1	301	-35.572	-39.997	4.47e-21	1.38e-18
209875_s_at	SPP1	secreted phosphoprotein 1	6696	-31.5115	-62.3007	5.02e-25	7.7e-22
219955_at	L1TD1	LINE-1 type transposase domain containing 1	54596	-31.1662	-36.7536	2.51e-20	5.25e-18
214240_at	GAL	galanin prepropeptide	51083	-29.8813	-36.8989	2.32e-20	5.04e-18
206286_s_at	TDGF1 /// TDGF3	teratocarcinoma-derived growth factor 1 /// teratocarcinoma-derived growth factor 3, pseudogene	6997 /// 6998	-29.7043	-43.7981	6.98e-22	2.92e-19
203324_s_at	CAV2	caveolin 2	858	-28.0026	-40.0679	4.31e-21	1.37e-18
231690_at	---	---	---	-27.2057	-53.3847	1.2e-23	9.93e-21
203872_at	ACTA1	actin, alpha 1, skeletal muscle	58	-26.4005	-39.2062	6.72e-21	1.87e-18
202912_at	ADM	adrenomedullin	133	-26.3764	-45.4373	3.29e-22	1.58e-19
203323_at	CAV2	caveolin 2	858	-25.3072	-34.5778	8.71e-20	1.54e-17
243161_x_at	ZFP42	zinc finger protein 42 homolog (mouse)	132625	-25.1943	-32.0139	4.17e-19	6.02e-17
220184_at	NANOG	Nanog homeobox	79923	-24.9598	-40.7547	3.04e-21	1.05e-18
212097_at	CAV1	caveolin 1, caveolae protein, 22kDa	857	-24.2049	-31.4614	5.93e-19	8.31e-17
237192_at	---	---	---	-22.8588	-54.3483	8.33e-24	7.45e-21
236519_at	C9orf135	chromosome 9 open reading frame 135	138255	-22.5807	-36.6425	2.67e-20	5.48e-18
206247_at	MICB	MHC class I polypeptide-related sequence B	4277	-22.4134	-39.7297	5.12e-21	1.51e-18
236894_at	L1TD1	LINE-1 type transposase domain containing 1	54596	-21.2005	-37.5784	1.6e-20	3.72e-18
225846_at	ESRP1	epithelial splicing regulatory protein 1	54845	-20.7588	-50.3439	4.01e-23	2.81e-20
236214_at	FAM71F1	family with sequence similarity 71, member F1	84691	-20.5081	-29.8874	1.68e-18	1.98e-16
209803_s_at	PHLDA2	pleckstrin homology-like domain, family A, member 2	7262	-20.3008	-35.1093	6.38e-20	1.16e-17
210265_x_at	POU5F1P3	POU class 5 homeobox 1 pseudogene 3	642559	-19.7817	-29.9186	1.64e-18	1.95e-16
206291_at	NTS	neurotensin	4922	-19.6628	-44.01	6.32e-22	2.68e-19
203065_s_at	CAV1	caveolin 1, caveolae protein, 22kDa	857	-18.7815	-29.8031	1.78e-18	2.07e-16
213982_s_at	RABGAP1L	RAB GTPase activating protein 1-like	9910	-18.7519	-40.2182	3.99e-21	1.3e-18
240681_at	---	---	---	-18.4374	-37.6317	1.55e-20	3.67e-18
224650_at	MAL2	mal, T-cell differentiation protein 2	114569	-18.1584	-21.7591	9.81e-16	5.03e-14
233413_at	---	---	---	-17.606	-33.0248	2.22e-19	3.48e-17
203397_s_at	GALNT3	UDP-N-acetyl-alpha-D-galactosamine:polypeptide N-acetylgalactosaminyltransferase 3 (GalNAc-T3)	2591	-17.289	-30.592	1.05e-18	1.32e-16
228885_at	MAMDC2	MAM domain containing 2	256691	-17.1875	-34.4516	9.38e-20	1.62e-17
209581_at	PLA2G16	phospholipase A2, group XVI	11145	-17.1848	-29.023	3.04e-18	3.3e-16
1570153_at	C13orf38	chromosome 13 open reading frame 38	728591	-17.1395	-33.7588	1.42e-19	2.39e-17
1555878_at	RPS24	Ribosomal protein S24	6229	-17.0653	-22.2666	6.2e-16	3.38e-14
230061_at	TM4SF18	Transmembrane 4 L six family member 18	116441	-16.6435	-32.3182	3.44e-19	4.99e-17
221245_s_at	FZD5	frizzled homolog 5 (Drosophila)	7855	-15.9215	-25.5396	4e-17	3.16e-15
225799_at	LOC541471 /// NCRNA00152	hypothetical LOC541471 /// non-protein coding RNA 152	112597 /// 541471	-15.6198	-32.7084	2.7e-19	4.08e-17
230356_at	---	---	---	-15.5535	-44.6929	4.61e-22	2.06e-19
204422_s_at	FGF2	fibroblast growth factor 2 (basic)	2247	-15.5168	-17.1297	1.08e-13	2.92e-12
225664_at	COL12A1	collagen, type XII, alpha 1	1303	-15.3696	-25.2914	4.86e-17	3.73e-15
237275_at	---	---	---	-15.212	-38.5057	9.71e-21	2.48e-18
202274_at	ACTG2	actin, gamma 2, smooth muscle, enteric	72	-14.6247	-31.8566	4.61e-19	6.56e-17
206336_at	CXCL6	chemokine (C-X-C motif) ligand 6 (granulocyte chemotactic protein 2)	6372	-14.5885	-28.0235	6.17e-18	6.27e-16
228782_at	SCGB3A2	secretoglobin, family 3A, member 2	117156	-14.3447	-47.5029	1.32e-22	7.6e-20
202498_s_at	SLC2A3	solute carrier family 2 (facilitated glucose transporter), member 3	6515	-14.2418	-31.3458	6.39e-19	8.69e-17
227826_s_at	---	---	---	-14.1635	-20.5981	2.91e-15	1.26e-13
205547_s_at	TAGLN	transgelin	6876	-14.1349	-21.4029	1.36e-15	6.64e-14
1554777_at	ZFP42	zinc finger protein 42 homolog (mouse)	132625	-13.8535	-38.4623	9.94e-21	2.5e-18
206204_at	GRB14	growth factor receptor-bound protein 14	2888	-13.8114	-33.1181	2.09e-19	3.3e-17
1554887_at	---	---	---	-13.6044	-25.8021	3.25e-17	2.66e-15
223423_at	GPR160	G protein-coupled receptor 160	26996	-13.4388	-27.7475	7.53e-18	7.31e-16
210905_x_at	POU5F1P4	POU class 5 homeobox 1 pseudogene 4	645682	-13.2772	-28.7183	3.76e-18	3.99e-16
203798_s_at	VSNL1	visinin-like 1	7447	-13.2616	-34.1855	1.1e-19	1.89e-17
230423_at	---	---	---	-13.2599	-28.0477	6.06e-18	6.2e-16
243818_at	SFTA1P	surfactant associated 1 (pseudogene)	207107	-13.1841	-45.7347	2.87e-22	1.4e-19
227971_at	NRK	Nik related kinase	203447	-13.0767	-26.1014	2.58e-17	2.19e-15
220108_at	GNA14	guanine nucleotide binding protein (G protein), alpha 14	9630	-12.963	-35.4218	5.33e-20	1e-17
208286_x_at	POU5F1 /// POU5F1B /// POU5F1P3 /// POU5F1P4	POU class 5 homeobox 1 /// POU class 5 homeobox 1B /// POU class 5 homeobox 1 pseudogene 3 /// POU class 5 homeobox 1 pseudogene 4	5460 /// 5462 /// 642559 /// 645682	-12.9348	-33.2778	1.9e-19	3.04e-17
239975_at	HLA-DPB2	major histocompatibility complex, class II, DP beta 2 (pseudogene)	3116	-12.3825	-35.2943	5.73e-20	1.06e-17
1554776_at	ZFP42	zinc finger protein 42 homolog (mouse)	132625	-11.8757	-27.116	1.2e-17	1.1e-15
204286_s_at	PMAIP1	phorbol-12-myristate-13-acetate-induced protein 1	5366	-11.8447	-23.3675	2.37e-16	1.49e-14
229292_at	EPB41L5	erythrocyte membrane protein band 4.1 like 5	57669	-11.6698	-35.3084	5.69e-20	1.06e-17
219863_at	HERC5	hect domain and RLD 5	51191	-11.2303	-29.8075	1.77e-18	2.07e-16
226231_at	---	---	---	-11.1535	-24.0473	1.34e-16	9.15e-15
201467_s_at	NQO1	NAD(P)H dehydrogenase, quinone 1	1728	-11.1215	-27.1401	1.18e-17	1.09e-15
204285_s_at	PMAIP1	phorbol-12-myristate-13-acetate-induced protein 1	5366	-11.0878	-38.893	7.92e-21	2.12e-18
217967_s_at	FAM129A	family with sequence similarity 129, member A	116496	-11.0745	-27.9778	6.38e-18	6.44e-16
219134_at	ELTD1	EGF, latrophilin and seven transmembrane domain containing 1	64123	-11.0159	-19.1392	1.24e-14	4.42e-13
202890_at	MAP7	microtubule-associated protein 7	9053	-10.9719	-18.9586	1.49e-14	5.26e-13
228153_at	RNF144B	ring finger protein 144B	255488	-10.8574	-29.6122	2.02e-18	2.3e-16
204702_s_at	NFE2L3	nuclear factor (erythroid-derived 2)-like 3	9603	-10.8026	-32.6465	2.8e-19	4.22e-17
201617_x_at	CALD1	caldesmon 1	800	-10.7805	-10.2112	1.57e-09	1.4e-08
218468_s_at	GREM1	gremlin 1, cysteine knot superfamily, homolog (Xenopus laevis)	26585	-10.648	-16.1458	3.37e-13	8.01e-12
1552390_a_at	C8orf47	chromosome 8 open reading frame 47	203111	-10.4115	-29.5279	2.14e-18	2.41e-16
203234_at	UPP1	uridine phosphorylase 1	7378	-10.3465	-40.0862	4.27e-21	1.37e-18
205442_at	MFAP3L	microfibrillar-associated protein 3-like	9848	-10.2825	-14.2496	3.65e-12	6.49e-11
215101_s_at	CXCL5	chemokine (C-X-C motif) ligand 5	6374	-10.2772	-24.532	8.96e-17	6.37e-15
217678_at	SLC7A11	solute carrier family 7, (cationic amino acid transporter, y+ system) member 11	23657	-10.2678	-17.8531	4.82e-14	1.46e-12
220239_at	KLHL7	kelch-like 7 (Drosophila)	55975	-10.2573	-37.2738	1.89e-20	4.28e-18
214532_x_at	POU5F1B	POU class 5 homeobox 1B	5462	-10.234	-29.1722	2.74e-18	3.03e-16
218073_s_at	TMEM48	transmembrane protein 48	55706	-10.1616	-14.263	3.58e-12	6.39e-11
215342_s_at	RABGAP1L	RAB GTPase activating protein 1-like	9910	-10.1209	-21.1979	1.65e-15	7.78e-14
203939_at	NT5E	5'-nucleotidase, ecto (CD73)	4907	-10.0693	-37.5561	1.62e-20	3.72e-18
202497_x_at	SLC2A3	solute carrier family 2 (facilitated glucose transporter), member 3	6515	-10.0582	-25.1951	5.25e-17	3.99e-15
212314_at	KIAA0746	KIAA0746 protein	23231	-9.9536	-22.8661	3.65e-16	2.17e-14
231766_s_at	COL12A1	collagen, type XII, alpha 1	1303	-9.86321	-32.3352	3.4e-19	4.96e-17
206456_at	GABRA5	gamma-aminobutyric acid (GABA) A receptor, alpha 5	2558	-9.75043	-26.8259	1.49e-17	1.35e-15
221035_s_at	TEX14	testis expressed 14	56155	-9.73858	-31.6424	5.28e-19	7.43e-17
1568574_x_at	SPP1	Secreted phosphoprotein 1	6696	-9.72968	-38.5427	9.52e-21	2.45e-18
221935_s_at	C3orf64	chromosome 3 open reading frame 64	285203	-9.49027	-18.2516	3.13e-14	9.93e-13
222088_s_at	SLC2A14 /// SLC2A3	solute carrier family 2 (facilitated glucose transporter), member 14 /// solute carrier family 2 (facilitated glucose transporter), member 3	144195 /// 6515	-9.48532	-27.2168	1.11e-17	1.03e-15
209448_at	HTATIP2	HIV-1 Tat interactive protein 2, 30kDa	10553	-9.45629	-25.7674	3.34e-17	2.72e-15
205463_s_at	PDGFA	platelet-derived growth factor alpha polypeptide	5154	-9.38922	-26.1377	2.51e-17	2.14e-15
235199_at	RNF125	ring finger protein 125	54941	-9.38366	-29.1409	2.8e-18	3.09e-16
237974_at	ABHD12B	abhydrolase domain containing 12B	145447	-9.31855	-33.2469	1.93e-19	3.08e-17
226926_at	DMKN	dermokine	93099	-9.30499	-31.0801	7.6e-19	1.01e-16
232001_at	LOC439949	hypothetical protein LOC439949	439949	-9.29389	-22.4777	5.14e-16	2.88e-14
213506_at	F2RL1	coagulation factor II (thrombin) receptor-like 1	2150	-9.26516	-20.8841	2.21e-15	1e-13
231698_at	FLJ36848	hypothetical LOC647115	647115	-9.23697	-24.3651	1.03e-16	7.24e-15
220238_s_at	KLHL7	kelch-like 7 (Drosophila)	55975	-9.23629	-22.3226	5.9e-16	3.25e-14
214834_at	PAR5	Prader-Willi/Angelman syndrome-5	8123	-9.16989	-14.5532	2.45e-12	4.55e-11
210519_s_at	NQO1	NAD(P)H dehydrogenase, quinone 1	1728	-9.13091	-24.5256	9.01e-17	6.39e-15
205328_at	CLDN10	claudin 10	9071	-9.04437	-20.1307	4.57e-15	1.86e-13
226863_at	FAM110C	family with sequence similarity 110, member C	642273	-8.9581	-23.9691	1.43e-16	9.61e-15
204222_s_at	GLIPR1	GLI pathogenesis-related 1	11010	-8.95564	-21.3445	1.44e-15	6.96e-14
1555724_s_at	TAGLN	transgelin	6876	-8.94862	-14.0083	5.03e-12	8.56e-11
231466_at	FAM71F1	family with sequence similarity 71, member F1	84691	-8.89057	-21.9568	8.19e-16	4.3e-14
225974_at	TMEM64	transmembrane protein 64	169200	-8.81187	-16.6935	1.77e-13	4.54e-12
228489_at	TM4SF18	transmembrane 4 L six family member 18	116441	-8.76368	-38.7621	8.48e-21	2.26e-18
238018_at	FAM150B	family with sequence similarity 150, member B	285016	-8.53187	-21.5927	1.14e-15	5.74e-14
206091_at	MATN3	matrilin 3	4148	-8.52853	-31.1201	7.4e-19	9.93e-17
230563_at	RASGEF1A	RasGEF domain family, member 1A	221002	-8.51886	-24.755	7.47e-17	5.45e-15
227180_at	ELOVL7	ELOVL family member 7, elongation of long chain fatty acids (yeast)	79993	-8.36282	-30.9448	8.3e-19	1.08e-16
204348_s_at	AK3L1	adenylate kinase 3-like 1	205	-8.31668	-18.992	1.44e-14	5.09e-13
209369_at	ANXA3	annexin A3	306	-8.29257	-31.3851	6.23e-19	8.55e-17
205206_at	KAL1	Kallmann syndrome 1 sequence	3730	-8.27684	-21.0827	1.83e-15	8.55e-14
202499_s_at	SLC2A3	solute carrier family 2 (facilitated glucose transporter), member 3	6515	-8.1621	-23.6199	1.91e-16	1.24e-14
221051_s_at	ITGB1BP3	integrin beta 1 binding protein 3	27231	-8.15138	-37.5642	1.61e-20	3.72e-18
202627_s_at	SERPINE1	serpin peptidase inhibitor, clade E (nexin, plasminogen activator inhibitor type 1), member 1	5054	-8.14954	-29.7613	1.83e-18	2.11e-16
230896_at	BEND4	BEN domain containing 4	389206	-8.0315	-17.1627	1.04e-13	2.83e-12
212590_at	RRAS2	related RAS viral (r-ras) oncogene homolog 2	22800	-7.94595	-32.4677	3.13e-19	4.67e-17
202628_s_at	SERPINE1	serpin peptidase inhibitor, clade E (nexin, plasminogen activator inhibitor type 1), member 1	5054	-7.91521	-17.4926	7.16e-14	2.05e-12
1561101_at	LOC153469	hypothetical protein LOC153469	153469	-7.85894	-23.9491	1.45e-16	9.73e-15
218538_s_at	MRS2	MRS2 magnesium homeostasis factor homolog (S. cerevisiae)	57380	-7.8052	-15.0544	1.29e-12	2.63e-11
204224_s_at	GCH1	GTP cyclohydrolase 1	2643	-7.75536	-19.2507	1.1e-14	3.99e-13
211796_s_at	TRBC1 /// TRBC2	T cell receptor beta constant 1 /// T cell receptor beta constant 2	28638 /// 28639	-7.74822	-23.2398	2.64e-16	1.65e-14
201839_s_at	EPCAM	epithelial cell adhesion molecule	4072	-7.74042	-22.4913	5.08e-16	2.85e-14
219121_s_at	ESRP1	epithelial splicing regulatory protein 1	54845	-7.73309	-40.0216	4.41e-21	1.38e-18
209829_at	FAM65B	family with sequence similarity 65, member B	9750	-7.67823	-16.0818	3.64e-13	8.56e-12
205850_s_at	GABRB3	gamma-aminobutyric acid (GABA) A receptor, beta 3	2562	-7.67362	-24.1353	1.24e-16	8.55e-15
209267_s_at	SLC39A8	solute carrier family 39 (zinc transporter), member 8	64116	-7.62496	-13.4962	1.01e-11	1.59e-10
227379_at	MBOAT1	membrane bound O-acyltransferase domain containing 1	154141	-7.61519	-35.7436	4.43e-20	8.55e-18
208456_s_at	RRAS2	related RAS viral (r-ras) oncogene homolog 2	22800	-7.60935	-15.3454	8.94e-13	1.91e-11
236140_at	GCLM	glutamate-cysteine ligase, modifier subunit	2730	-7.5982	-22.5077	5e-16	2.82e-14
233305_at	NECAB1	N-terminal EF-hand calcium binding protein 1	64168	-7.54208	-32.4103	3.25e-19	4.78e-17
58916_at	KCTD14	potassium channel tetramerisation domain containing 14	65987	-7.48914	-24.011	1.38e-16	9.34e-15
223611_s_at	LNX1	ligand of numb-protein X 1	84708	-7.47495	-25.6934	3.54e-17	2.85e-15
213050_at	COBL	cordon-bleu homolog (mouse)	23242	-7.4244	-34.5431	8.89e-20	1.56e-17
239823_at	---	---	---	-7.39812	-24.9413	6.43e-17	4.78e-15
237810_at	CLDN6	claudin 6	9074	-7.38084	-33.3349	1.83e-19	2.98e-17
222870_s_at	B3GNT2	UDP-GlcNAc:betaGal beta-1,3-N-acetylglucosaminyltransferase 2	10678	-7.37608	-10.2139	1.56e-09	1.4e-08
223000_s_at	F11R	F11 receptor	50848	-7.31331	-29.5567	2.1e-18	2.38e-16
203797_at	VSNL1	visinin-like 1	7447	-7.3122	-26.5644	1.81e-17	1.62e-15
206309_at	LECT1	leukocyte cell derived chemotaxin 1	11061	-7.2866	-24.7645	7.42e-17	5.44e-15
223276_at	MST150	MSTP150	85027	-7.26203	-25.3417	4.67e-17	3.6e-15
227830_at	GABRB3	gamma-aminobutyric acid (GABA) A receptor, beta 3	2562	-7.23576	-16.6162	1.94e-13	4.89e-12
205480_s_at	UGP2	UDP-glucose pyrophosphorylase 2	7360	-7.20639	-32.9764	2.28e-19	3.57e-17
209277_at	TFPI2	tissue factor pathway inhibitor 2	7980	-7.18255	-25.2782	4.91e-17	3.76e-15
213764_s_at	MFAP5	microfibrillar associated protein 5	8076	-7.18141	-37.7027	1.49e-20	3.56e-18
204780_s_at	FAS	Fas (TNF receptor superfamily, member 6)	355	-7.1441	-16.2671	2.92e-13	7.05e-12
203448_s_at	TERF1	telomeric repeat binding factor (NIMA-interacting) 1	7013	-7.12094	-21.3158	1.48e-15	7.13e-14
225342_at	AK3L1	adenylate kinase 3-like 1	205	-7.05367	-21.9168	8.5e-16	4.42e-14
204983_s_at	GPC4	glypican 4	2239	-7.01871	-25.8032	3.25e-17	2.66e-15
231817_at	USP53	ubiquitin specific peptidase 53	54532	-6.97839	-15.7414	5.49e-13	1.24e-11
205190_at	PLS1	plastin 1 (I isoform)	5357	-6.94917	-15.8908	4.58e-13	1.05e-11
201468_s_at	NQO1	NAD(P)H dehydrogenase, quinone 1	1728	-6.9109	-21.5609	1.18e-15	5.85e-14
219823_at	LIN28	lin-28 homolog (C. elegans)	79727	-6.87933	-24.5962	8.5e-17	6.1e-15
226099_at	ELL2	elongation factor, RNA polymerase II, 2	22936	-6.86025	-13.0177	1.98e-11	2.88e-10
205726_at	DIAPH2	diaphanous homolog 2 (Drosophila)	1730	-6.84091	-29.7561	1.84e-18	2.11e-16
1554020_at	BICD1	bicaudal D homolog 1 (Drosophila)	636	-6.8409	-16.849	1.48e-13	3.86e-12
203180_at	ALDH1A3	aldehyde dehydrogenase 1 family, member A3	220	-6.82329	-20.2595	4.03e-15	1.67e-13
216405_at	---	---	---	-6.81887	-27.8718	6.88e-18	6.84e-16
206029_at	ANKRD1	ankyrin repeat domain 1 (cardiac muscle)	27063	-6.7946	-30.7828	9.23e-19	1.17e-16
226497_s_at	---	---	---	-6.77794	-29.8745	1.69e-18	1.99e-16
209921_at	SLC7A11	solute carrier family 7, (cationic amino acid transporter, y+ system) member 11	23657	-6.7188	-17.3847	8.08e-14	2.26e-12
231079_at	---	---	---	-6.69365	-30.9134	8.47e-19	1.09e-16
213954_at	FAM169A	family with sequence similarity 169, member A	26049	-6.6735	-8.57099	3.02e-08	1.97e-07
201163_s_at	IGFBP7	insulin-like growth factor binding protein 7	3490	-6.66846	-34.9962	6.82e-20	1.23e-17
220137_at	FLJ20674	hypothetical protein FLJ20674	54621	-6.65514	-13.2478	1.43e-11	2.17e-10
37549_g_at	BBS9	Bardet-Biedl syndrome 9	27241	-6.64951	-22.7934	3.89e-16	2.28e-14
206307_s_at	FOXD1	forkhead box D1	2297	-6.62034	-27.6015	8.38e-18	8.05e-16
228107_at	LOC100127983	hypothetical protein LOC100127983	100127983	-6.59737	-22.019	7.75e-16	4.08e-14
235759_at	---	---	---	-6.5952	-18.0146	4.04e-14	1.25e-12
202235_at	SLC16A1	solute carrier family 16, member 1 (monocarboxylic acid transporter 1)	6566	-6.56818	-18.7994	1.76e-14	6.05e-13
202693_s_at	STK17A	serine/threonine kinase 17a	9263	-6.56255	-21.2493	1.57e-15	7.45e-14
201616_s_at	CALD1	caldesmon 1	800	-6.53729	-13.6202	8.52e-12	1.36e-10
220943_s_at	C2orf56	chromosome 2 open reading frame 56	55471	-6.51427	-21.9552	8.21e-16	4.3e-14
202626_s_at	LYN	v-yes-1 Yamaguchi sarcoma viral related oncogene homolog	4067	-6.50227	-21.569	1.17e-15	5.83e-14
210074_at	CTSL2	cathepsin L2	1515	-6.49066	-26.8582	1.45e-17	1.32e-15
225944_at	NLN	neurolysin (metallopeptidase M3 family)	57486	-6.47515	-21.5224	1.22e-15	6.04e-14
201058_s_at	MYL9	myosin, light chain 9, regulatory	10398	-6.45753	-22.1356	6.97e-16	3.76e-14
209958_s_at	BBS9	Bardet-Biedl syndrome 9	27241	-6.44554	-21.609	1.13e-15	5.67e-14
201005_at	CD9	CD9 molecule	928	-6.4314	-29.3488	2.43e-18	2.7e-16
229724_at	GABRB3	gamma-aminobutyric acid (GABA) A receptor, beta 3	2562	-6.42564	-9.3235	7.46e-09	5.62e-08
220668_s_at	DNMT3B	DNA (cytosine-5-)-methyltransferase 3 beta	1789	-6.39277	-39.1091	7.07e-21	1.93e-18
209278_s_at	TFPI2	tissue factor pathway inhibitor 2	7980	-6.38751	-22.4131	5.44e-16	3.04e-14
233002_at	PPP4R4	protein phosphatase 4, regulatory subunit 4	57718	-6.36211	-11.6054	1.62e-10	1.87e-09
229139_at	JPH1	junctophilin 1	56704	-6.34863	-22.133	6.99e-16	3.76e-14
210118_s_at	IL1A	interleukin 1, alpha	3552	-6.32225	-21.8928	8.68e-16	4.49e-14
226142_at	GLIPR1	GLI pathogenesis-related 1	11010	-6.29393	-20.771	2.46e-15	1.11e-13
225792_at	HOOK1	hook homolog 1 (Drosophila)	51361	-6.29369	-13.0414	1.91e-11	2.8e-10
204005_s_at	PAWR	PRKC, apoptosis, WT1, regulator	5074	-6.29327	-15.4758	7.6e-13	1.66e-11
226237_at	---	---	---	-6.29189	-18.259	3.11e-14	9.87e-13
238935_at	RPS27L	ribosomal protein S27-like	51065	-6.27659	-20.3248	3.78e-15	1.57e-13
205709_s_at	CDS1	CDP-diacylglycerol synthase (phosphatidate cytidylyltransferase) 1	1040	-6.27352	-19.1784	1.19e-14	4.27e-13
203593_at	CD2AP	CD2-associated protein	23607	-6.18113	-11.7615	1.27e-10	1.5e-09
215719_x_at	FAS	Fas (TNF receptor superfamily, member 6)	355	-6.17221	-23.0404	3.14e-16	1.9e-14
206026_s_at	TNFAIP6	tumor necrosis factor, alpha-induced protein 6	7130	-6.1668	-23.4004	2.3e-16	1.45e-14
206541_at	KLKB1	kallikrein B, plasma (Fletcher factor) 1	3818	-6.15629	-26.1494	2.49e-17	2.12e-15
1561331_at	C1orf99	chromosome 1 open reading frame 99	339476	-6.1017	-29.9963	1.56e-18	1.87e-16
231644_at	---	---	---	-6.07326	-20.763	2.48e-15	1.11e-13
205542_at	STEAP1	six transmembrane epithelial antigen of the prostate 1	26872	-6.06827	-23.9537	1.44e-16	9.71e-15
235020_at	TAF4B	TAF4b RNA polymerase II, TATA box binding protein (TBP)-associated factor, 105kDa	6875	-6.04892	-16.4845	2.26e-13	5.6e-12
203925_at	GCLM	glutamate-cysteine ligase, modifier subunit	2730	-6.0401	-19.4213	9.27e-15	3.44e-13
219326_s_at	B3GNT2	UDP-GlcNAc:betaGal beta-1,3-N-acetylglucosaminyltransferase 2	10678	-6.03737	-10.4424	1.06e-09	9.9e-09
230781_at	---	---	---	-6.02705	-12.0942	7.65e-11	9.55e-10
239835_at	KBTBD8	kelch repeat and BTB (POZ) domain containing 8	84541	-6.02097	-16.1852	3.22e-13	7.69e-12
220161_s_at	EPB41L4B	erythrocyte membrane protein band 4.1 like 4B	54566	-6.00743	-15.3635	8.74e-13	1.87e-11
236565_s_at	LARP6	La ribonucleoprotein domain family, member 6	55323	-6.00096	-25.6173	3.76e-17	3e-15
224219_s_at	TRPC4	transient receptor potential cation channel, subfamily C, member 4	7223	-5.99963	-20.53	3.1e-15	1.33e-13
1554667_s_at	METTL8	methyltransferase like 8	79828	-5.98495	-23.2512	2.62e-16	1.64e-14
241912_at	ZNF814	zinc finger protein 814	730051	-5.97776	-22.7141	4.17e-16	2.43e-14
204004_at	PAWR	PRKC, apoptosis, WT1, regulator	5074	-5.97572	-12.8039	2.69e-11	3.77e-10
241772_at	---	---	---	-5.9591	-21.3113	1.48e-15	7.14e-14
1554007_at	---	---	---	-5.94004	-13.9807	5.22e-12	8.83e-11
229978_at	LOC729993	hypothetical protein LOC729993	729993	-5.93774	-22.0825	7.31e-16	3.91e-14
214452_at	BCAT1	branched chain aminotransferase 1, cytosolic	586	-5.92904	-20.3541	3.68e-15	1.54e-13
218469_at	GREM1	gremlin 1, cysteine knot superfamily, homolog (Xenopus laevis)	26585	-5.92634	-20.5015	3.19e-15	1.36e-13
200706_s_at	LITAF	lipopolysaccharide-induced TNF factor	9516	-5.90041	-17.3668	8.24e-14	2.3e-12
202234_s_at	SLC16A1	solute carrier family 16, member 1 (monocarboxylic acid transporter 1)	6566	-5.89859	-13.9314	5.58e-12	9.37e-11
202746_at	ITM2A	integral membrane protein 2A	9452	-5.88935	-14.7312	1.94e-12	3.73e-11
216319_at	---	---	---	-5.84901	-29.1276	2.83e-18	3.11e-16
202236_s_at	SLC16A1	solute carrier family 16, member 1 (monocarboxylic acid transporter 1)	6566	-5.84304	-12.2175	6.36e-11	8.14e-10
230083_at	USP53	ubiquitin specific peptidase 53	54532	-5.83981	-16.5052	2.21e-13	5.47e-12
222872_x_at	OBFC2A	oligonucleotide/oligosaccharide-binding fold containing 2A	64859	-5.8306	-22.3913	5.55e-16	3.09e-14
205066_s_at	ENPP1	ectonucleotide pyrophosphatase/phosphodiesterase 1	5167	-5.82273	-19.7837	6.44e-15	2.5e-13
210852_s_at	AASS	aminoadipate-semialdehyde synthase	10157	-5.81832	-17.3991	7.95e-14	2.24e-12
237778_at	---	---	---	-5.81147	-24.5812	8.61e-17	6.16e-15
209925_at	OCLN	occludin	4950	-5.80132	-17.2708	9.18e-14	2.55e-12
201695_s_at	NP	nucleoside phosphorylase	4860	-5.79556	-21.6121	1.12e-15	5.66e-14
220317_at	LRAT	lecithin retinol acyltransferase (phosphatidylcholine--retinol O-acyltransferase)	9227	-5.7878	-17.446	7.55e-14	2.14e-12
205352_at	SERPINI1	serpin peptidase inhibitor, clade I (neuroserpin), member 1	5274	-5.78358	-20.3431	3.72e-15	1.55e-13
222662_at	PPP1R3B	protein phosphatase 1, regulatory (inhibitor) subunit 3B	79660	-5.77943	-15.1366	1.16e-12	2.4e-11
223560_s_at	C2orf56	chromosome 2 open reading frame 56	55471	-5.7642	-30.4336	1.16e-18	1.44e-16
204485_s_at	TOM1L1	target of myb1 (chicken)-like 1	10040	-5.72479	-19.8648	5.94e-15	2.32e-13
219073_s_at	OSBPL10	oxysterol binding protein-like 10	114884	-5.71757	-22.7141	4.17e-16	2.43e-14
203449_s_at	TERF1	telomeric repeat binding factor (NIMA-interacting) 1	7013	-5.70319	-25.7344	3.43e-17	2.78e-15
201487_at	CTSC	cathepsin C	1075	-5.70272	-39.243	6.59e-21	1.85e-18
219232_s_at	EGLN3	egl nine homolog 3 (C. elegans)	112399	-5.68994	-20.9375	2.1e-15	9.61e-14
209101_at	CTGF	connective tissue growth factor	1490	-5.67901	-23.5983	1.95e-16	1.26e-14
202625_at	LYN	v-yes-1 Yamaguchi sarcoma viral related oncogene homolog	4067	-5.66783	-17.154	1.05e-13	2.86e-12
223342_at	RRM2B	ribonucleotide reductase M2 B (TP53 inducible)	50484	-5.66041	-19.4035	9.44e-15	3.49e-13
1559827_at	LOC401074	hypothetical LOC401074	401074	-5.65227	-22.7631	4e-16	2.34e-14
212589_at	RRAS2	related RAS viral (r-ras) oncogene homolog 2	22800	-5.65071	-21.5765	1.16e-15	5.81e-14
215913_s_at	GULP1	GULP, engulfment adaptor PTB domain containing 1	51454	-5.63485	-16.3374	2.69e-13	6.54e-12
225871_at	STEAP2	six transmembrane epithelial antigen of the prostate 2	261729	-5.62302	-15.5901	6.6e-13	1.47e-11
230466_s_at	---	---	---	-5.61247	-18.3489	2.82e-14	9.11e-13
208840_s_at	G3BP2	GTPase activating protein (SH3 domain) binding protein 2	9908	-5.61096	-12.1853	6.67e-11	8.47e-10
205286_at	TFAP2C	transcription factor AP-2 gamma (activating enhancer binding protein 2 gamma)	7022	-5.59582	-18.0017	4.1e-14	1.27e-12
205132_at	ACTC1	actin, alpha, cardiac muscle 1	70	-5.58318	-26.4846	1.93e-17	1.69e-15
225646_at	CTSC	cathepsin C	1075	-5.57669	-18.1229	3.6e-14	1.13e-12
205771_s_at	AKAP7	A kinase (PRKA) anchor protein 7	9465	-5.57395	-16.6556	1.85e-13	4.71e-12
219651_at	DPPA4	developmental pluripotency associated 4	55211	-5.55246	-24.5363	8.93e-17	6.36e-15
219439_at	C1GALT1	core 1 synthase, glycoprotein-N-acetylgalactosamine 3-beta-galactosyltransferase, 1	56913	-5.55054	-17.0256	1.21e-13	3.25e-12
227827_at	---	---	---	-5.53744	-15.7543	5.4e-13	1.22e-11
206683_at	ZNF165	zinc finger protein 165	7718	-5.53735	-17.7404	5.45e-14	1.62e-12
228956_at	UGT8	UDP glycosyltransferase 8	7368	-5.52294	-12.093	7.67e-11	9.57e-10
209758_s_at	MFAP5	microfibrillar associated protein 5	8076	-5.5138	-25.1975	5.24e-17	3.99e-15
225647_s_at	CTSC	cathepsin C	1075	-5.50683	-6.03206	5.85e-06	2.33e-05
219654_at	PTPLA	protein tyrosine phosphatase-like (proline instead of catalytic arginine), member A	9200	-5.45816	-22.5134	4.98e-16	2.81e-14
232985_s_at	DPPA4	developmental pluripotency associated 4	55211	-5.45278	-30.7976	9.14e-19	1.16e-16
214022_s_at	IFITM1	interferon induced transmembrane protein 1 (9-27)	8519	-5.43528	-27.1855	1.14e-17	1.06e-15
1557961_s_at	LOC100127983	hypothetical protein LOC100127983	100127983	-5.40871	-22.0194	7.74e-16	4.08e-14
204949_at	ICAM3	intercellular adhesion molecule 3	3385	-5.40261	-19.7582	6.61e-15	2.56e-13
210611_s_at	DTNA	dystrobrevin, alpha	1837	-5.39915	-21.5707	1.17e-15	5.83e-14
227803_at	ENPP5	ectonucleotide pyrophosphatase/phosphodiesterase 5 (putative function)	59084	-5.38278	-19.3565	9.9e-15	3.62e-13
228875_at	FAM162B	family with sequence similarity 162, member B	221303	-5.37654	-25.3325	4.71e-17	3.62e-15
225943_at	NLN	neurolysin (metallopeptidase M3 family)	57486	-5.3668	-16.5187	2.17e-13	5.4e-12
219582_at	OGFRL1	opioid growth factor receptor-like 1	79627	-5.34096	-18.5483	2.28e-14	7.63e-13
219987_at	---	---	---	-5.334	-12.5139	4.1e-11	5.51e-10
242128_at	OTX2	orthodenticle homeobox 2	5015	-5.33392	-14.8822	1.6e-12	3.16e-11
206383_s_at	G3BP2	GTPase activating protein (SH3 domain) binding protein 2	9908	-5.32326	-13.1343	1.68e-11	2.5e-10
234986_at	---	---	---	-5.29491	-11.3629	2.37e-10	2.61e-09
209307_at	SWAP70	SWAP-70 protein	23075	-5.28834	-12.5164	4.08e-11	5.49e-10
204984_at	GPC4	glypican 4	2239	-5.28514	-24.7156	7.72e-17	5.58e-15
1556012_at	KLHDC7A	kelch domain containing 7A	127707	-5.27659	-19.8688	5.92e-15	2.32e-13
202949_s_at	FHL2	four and a half LIM domains 2	2274	-5.2662	-23.1548	2.84e-16	1.75e-14
205625_s_at	CALB1	calbindin 1, 28kDa	793	-5.26142	-18.0331	3.96e-14	1.23e-12
208941_s_at	SEPHS1	selenophosphate synthetase 1	22929	-5.24354	-27.1424	1.17e-17	1.09e-15
224407_s_at	RP6-213H19.1	serine/threonine protein kinase MST4	51765	-5.11151	-6.42079	2.47e-06	1.06e-05
1553105_s_at	DSG2	desmoglein 2	1829	-5.0868	-13.3717	1.2e-11	1.85e-10
205217_at	TIMM8A	translocase of inner mitochondrial membrane 8 homolog A (yeast)	1678	-5.08079	-19.5151	8.43e-15	3.17e-13
221605_s_at	PIPOX	pipecolic acid oxidase	51268	-5.06621	-19.0901	1.3e-14	4.63e-13
203971_at	SLC31A1	solute carrier family 31 (copper transporters), member 1	1317	-5.03391	-23.9316	1.47e-16	9.79e-15
1565162_s_at	MGST1	microsomal glutathione S-transferase 1	4257	-5.03328	-9.60864	4.47e-09	3.55e-08
238183_at	---	---	---	-5.02985	-17.9132	4.51e-14	1.38e-12
232180_at	UGP2	UDP-glucose pyrophosphorylase 2	7360	-5.02515	-23.5391	2.05e-16	1.32e-14
203814_s_at	NQO2	NAD(P)H dehydrogenase, quinone 2	4835	-5.02028	-23.2115	2.71e-16	1.67e-14
223211_at	HACL1	2-hydroxyacyl-CoA lyase 1	26061	-5.01557	-18.2678	3.08e-14	9.8e-13
217996_at	PHLDA1	pleckstrin homology-like domain, family A, member 1	22822	-5.01083	-32.503	3.06e-19	4.59e-17
230793_at	LRRC16A	leucine rich repeat containing 16A	55604	-5.00446	-10.4929	9.74e-10	9.19e-09
209306_s_at	SWAP70	SWAP-70 protein	23075	-4.99367	-18.8289	1.7e-14	5.91e-13
233085_s_at	OBFC2A	oligonucleotide/oligosaccharide-binding fold containing 2A	64859	-4.98973	-16.7346	1.69e-13	4.36e-12
222572_at	PPM2C	protein phosphatase 2C, magnesium-dependent, catalytic subunit	54704	-4.98078	-15.0539	1.29e-12	2.63e-11
228810_at	CCNYL1	cyclin Y-like 1	151195	-4.96704	-14.8644	1.64e-12	3.21e-11
218536_at	MRS2	MRS2 magnesium homeostasis factor homolog (S. cerevisiae)	57380	-4.96526	-16.6895	1.78e-13	4.56e-12
201631_s_at	IER3	immediate early response 3	8870	-4.9486	-23.863	1.56e-16	1.03e-14
237552_at	---	---	---	-4.92673	-21.6311	1.1e-15	5.58e-14
221881_s_at	CLIC4	chloride intracellular channel 4	25932	-4.91955	-16.5208	2.17e-13	5.4e-12
212246_at	MCFD2	multiple coagulation factor deficiency 2	90411	-4.91843	-14.4925	2.65e-12	4.86e-11
205048_s_at	PSPH	phosphoserine phosphatase	5723	-4.91816	-11.4094	2.2e-10	2.44e-09
213664_at	SLC1A1	solute carrier family 1 (neuronal/epithelial high affinity glutamate transporter, system Xag), member 1	6505	-4.91521	-13.3929	1.17e-11	1.8e-10
208650_s_at	CD24	CD24 molecule	100133941	-4.87913	-17.0759	1.14e-13	3.08e-12
214021_x_at	ITGB5	Integrin, beta 5	3693	-4.87909	-14.965	1.44e-12	2.89e-11
208690_s_at	PDLIM1	PDZ and LIM domain 1	9124	-4.87261	-25.5022	4.12e-17	3.22e-15
218273_s_at	PPM2C	protein phosphatase 2C, magnesium-dependent, catalytic subunit	54704	-4.86142	-8.26135	5.48e-08	3.35e-07
211781_x_at	---	---	---	-4.84918	-25.511	4.09e-17	3.2e-15
216252_x_at	FAS	Fas (TNF receptor superfamily, member 6)	355	-4.82112	-21.4071	1.36e-15	6.63e-14
201601_x_at	IFITM1	interferon induced transmembrane protein 1 (9-27)	8519	-4.82069	-12.6003	3.61e-11	4.93e-10
202430_s_at	PLSCR1	phospholipid scramblase 1	5359	-4.81295	-15.3977	8.37e-13	1.8e-11
214697_s_at	ROD1	ROD1 regulator of differentiation 1 (S. pombe)	9991	-4.78755	-15.5548	6.9e-13	1.53e-11
239552_at	VWDE	von Willebrand factor D and EGF domains	221806	-4.78309	-18.4811	2.45e-14	8.12e-13
37547_at	BBS9	Bardet-Biedl syndrome 9	27241	-4.77839	-20.6333	2.81e-15	1.22e-13
212150_at	EFR3A	EFR3 homolog A (S. cerevisiae)	23167	-4.77725	-8.598	2.87e-08	1.88e-07
223681_s_at	INADL	InaD-like (Drosophila)	10207	-4.76503	-18.1401	3.53e-14	1.11e-12
229088_at	ENPP1	ectonucleotide pyrophosphatase/phosphodiesterase 1	5167	-4.75654	-18.5376	2.31e-14	7.7e-13
203992_s_at	KDM6A	lysine (K)-specific demethylase 6A	7403	-4.74407	-9.65808	4.1e-09	3.29e-08
236249_at	IKIP	IKK interacting protein	121457	-4.73774	-14.7422	1.92e-12	3.7e-11
227236_at	TSPAN2	tetraspanin 2	10100	-4.7216	-17.218	9.74e-14	2.68e-12
207180_s_at	HTATIP2	HIV-1 Tat interactive protein 2, 30kDa	10553	-4.7198	-22.5498	4.82e-16	2.74e-14
228050_at	UTP15	UTP15, U3 small nucleolar ribonucleoprotein, homolog (S. cerevisiae)	84135	-4.70718	-14.0052	5.05e-12	8.59e-11
1552580_at	TRIML2	tripartite motif family-like 2	205860	-4.69685	-17.5284	6.89e-14	1.99e-12
212815_at	ASCC3	activating signal cointegrator 1 complex subunit 3	10973	-4.6959	-15.5209	7.19e-13	1.58e-11
203650_at	PROCR	protein C receptor, endothelial (EPCR)	10544	-4.69435	-16.5168	2.18e-13	5.41e-12
213285_at	TMEM30B	transmembrane protein 30B	161291	-4.69171	-22.5852	4.67e-16	2.67e-14
229377_at	GRTP1	growth hormone regulated TBC protein 1	79774	-4.67701	-15.9781	4.12e-13	9.54e-12
235103_at	MAN2A1	mannosidase, alpha, class 2A, member 1	4124	-4.67105	-9.3061	7.7e-09	5.78e-08
225579_at	PQLC3	PQ loop repeat containing 3	130814	-4.66059	-19.3735	9.73e-15	3.58e-13
202872_at	ATP6V1C1	ATPase, H+ transporting, lysosomal 42kDa, V1 subunit C1	528	-4.65383	-17.4991	7.11e-14	2.04e-12
242338_at	TMEM64	transmembrane protein 64	169200	-4.639	-17.1783	1.02e-13	2.79e-12
222071_s_at	SLCO4C1	solute carrier organic anion transporter family, member 4C1	353189	-4.63158	-20.4662	3.3e-15	1.4e-13
219959_at	MOCOS	molybdenum cofactor sulfurase	55034	-4.61431	-21.2853	1.52e-15	7.28e-14
213765_at	MFAP5	microfibrillar associated protein 5	8076	-4.60734	-16.2856	2.86e-13	6.92e-12
1557636_a_at	C7orf57	chromosome 7 open reading frame 57	136288	-4.60447	-13.1954	1.54e-11	2.31e-10
208146_s_at	CPVL	carboxypeptidase, vitellogenic-like	54504	-4.60348	-21.2716	1.54e-15	7.34e-14
242260_at	MATR3	Matrin 3	9782	-4.60055	-21.1763	1.68e-15	7.9e-14
203991_s_at	KDM6A	lysine (K)-specific demethylase 6A	7403	-4.59671	-11.8171	1.17e-10	1.39e-09
222412_s_at	SSR3	signal sequence receptor, gamma (translocon-associated protein gamma)	6747	-4.59642	-9.58479	4.67e-09	3.69e-08
205968_at	KCNS3	potassium voltage-gated channel, delayed-rectifier, subfamily S, member 3	3790	-4.59519	-12.5414	3.94e-11	5.32e-10
228565_at	KIAA1804	mixed lineage kinase 4	84451	-4.59481	-16.3156	2.76e-13	6.69e-12
209238_at	STX3	syntaxin 3	6809	-4.59364	-15.1673	1.12e-12	2.32e-11
220817_at	TRPC4	transient receptor potential cation channel, subfamily C, member 4	7223	-4.59102	-17.6607	5.95e-14	1.75e-12
206268_at	LEFTY1	left-right determination factor 1	10637	-4.58435	-23.7144	1.77e-16	1.16e-14
205626_s_at	CALB1	calbindin 1, 28kDa	793	-4.57976	-12.5512	3.88e-11	5.25e-10
1561341_at	---	---	---	-4.57078	-16.4259	2.42e-13	5.95e-12
205479_s_at	PLAU	plasminogen activator, urokinase	5328	-4.54109	-20.9575	2.06e-15	9.46e-14
208940_at	SEPHS1	selenophosphate synthetase 1	22929	-4.53058	-16.2892	2.85e-13	6.89e-12
210946_at	PPAP2A	phosphatidic acid phosphatase type 2A	8611	-4.50295	-28.9216	3.26e-18	3.51e-16
203341_at	CEBPZ	CCAAT/enhancer binding protein (C/EBP), zeta	10153	-4.50091	-20.8677	2.25e-15	1.02e-13
230630_at	AK3L1	Adenylate kinase 3-like 1	205	-4.49968	-22.1557	6.85e-16	3.71e-14
209900_s_at	SLC16A1	solute carrier family 16, member 1 (monocarboxylic acid transporter 1)	6566	-4.49853	-12.9061	2.32e-11	3.32e-10
202990_at	PYGL	phosphorylase, glycogen, liver	5836	-4.49724	-21.4139	1.35e-15	6.6e-14
235921_at	---	---	---	-4.49222	-17.2305	9.61e-14	2.65e-12
205768_s_at	SLC27A2	solute carrier family 27 (fatty acid transporter), member 2	11001	-4.47567	-17.6991	5.7e-14	1.69e-12
227226_at	MRAP2	melanocortin 2 receptor accessory protein 2	112609	-4.47374	-18.3501	2.82e-14	9.11e-13
223784_at	TMEM27	transmembrane protein 27	57393	-4.47303	-9.94783	2.47e-09	2.09e-08
231731_at	OTX2	orthodenticle homeobox 2	5015	-4.46873	-20.7939	2.41e-15	1.08e-13
223278_at	GJB2	gap junction protein, beta 2, 26kDa	2706	-4.46319	-14.7416	1.92e-12	3.7e-11
201289_at	CYR61	cysteine-rich, angiogenic inducer, 61	3491	-4.44608	-21.0708	1.86e-15	8.62e-14
226778_at	C8orf42	chromosome 8 open reading frame 42	157695	-4.43676	-12.2752	5.83e-11	7.52e-10
203100_s_at	CDYL	chromodomain protein, Y-like	9425	-4.42513	-16.9548	1.31e-13	3.47e-12
204347_at	AK3L1	Adenylate kinase 3-like 1	205	-4.41916	-13.6102	8.63e-12	1.38e-10
217744_s_at	PERP	PERP, TP53 apoptosis effector	64065	-4.41699	-19.3596	9.87e-15	3.62e-13
201761_at	MTHFD2	methylenetetrahydrofolate dehydrogenase (NADP+ dependent) 2, methenyltetrahydrofolate cyclohydrolase	10797	-4.41273	-19.5972	7.76e-15	2.96e-13
237461_at	NLRP7	NLR family, pyrin domain containing 7	199713	-4.40193	-23.4794	2.15e-16	1.38e-14
223541_at	HAS3	hyaluronan synthase 3	3038	-4.39977	-15.8304	4.93e-13	1.12e-11
222587_s_at	GALNT7	UDP-N-acetyl-alpha-D-galactosamine:polypeptide N-acetylgalactosaminyltransferase 7 (GalNAc-T7)	51809	-4.39128	-7.8988	1.12e-07	6.38e-07
201573_s_at	ETF1	eukaryotic translation termination factor 1	2107	-4.38887	-12.7472	2.92e-11	4.06e-10
226223_at	---	---	---	-4.38748	-15.4153	8.19e-13	1.77e-11
1569886_a_at	GLB1L3	galactosidase, beta 1-like 3	112937	-4.383	-22.661	4.37e-16	2.52e-14
231837_at	USP28	ubiquitin specific peptidase 28	57646	-4.37894	-7.41349	3e-07	1.55e-06
213201_s_at	TNNT1	troponin T type 1 (skeletal, slow)	7138	-4.37743	-14.043	4.8e-12	8.23e-11
206424_at	CYP26A1	cytochrome P450, family 26, subfamily A, polypeptide 1	1592	-4.37673	-28.072	5.96e-18	6.11e-16
219869_s_at	SLC39A8	solute carrier family 39 (zinc transporter), member 8	64116	-4.37453	-11.6188	1.58e-10	1.83e-09
218717_s_at	LEPREL1	leprecan-like 1	55214	-4.36289	-19.4258	9.23e-15	3.43e-13
1563357_at	---	---	---	-4.36092	-11.6146	1.59e-10	1.84e-09
36711_at	MAFF	v-maf musculoaponeurotic fibrosarcoma oncogene homolog F (avian)	23764	-4.35791	-13.5053	9.98e-12	1.58e-10
222745_s_at	C15orf29	chromosome 15 open reading frame 29	79768	-4.35764	-20.2376	4.12e-15	1.7e-13
241897_at	---	---	---	-4.35256	-17.1975	9.97e-14	2.73e-12
223710_at	CCL26	chemokine (C-C motif) ligand 26	10344	-4.35054	-19.8972	5.76e-15	2.26e-13
230903_s_at	C8orf42	chromosome 8 open reading frame 42	157695	-4.34998	-14.135	4.25e-12	7.41e-11
206117_at	TPM1	tropomyosin 1 (alpha)	7168	-4.34514	-28.6506	3.95e-18	4.17e-16
218195_at	C6orf211	chromosome 6 open reading frame 211	79624	-4.31686	-13.6338	8.36e-12	1.34e-10
235749_at	UGCGL2	UDP-glucose ceramide glucosyltransferase-like 2	55757	-4.31663	-14.4873	2.67e-12	4.89e-11
230263_s_at	DOCK5	Dedicator of cytokinesis 5	80005	-4.31529	-18.4659	2.49e-14	8.22e-13
205741_s_at	DTNA	dystrobrevin, alpha	1837	-4.31278	-16.0792	3.65e-13	8.58e-12
227727_at	MRGPRF	MAS-related GPR, member F	116535	-4.30691	-24.024	1.36e-16	9.25e-15
213447_at	IPW	imprinted in Prader-Willi syndrome (non-protein coding)	3653	-4.29863	-12.7259	3.01e-11	4.18e-10
214435_x_at	RALA	v-ral simian leukemia viral oncogene homolog A (ras related)	5898	-4.29377	-21.842	9.09e-16	4.68e-14
1553530_a_at	ITGB1	integrin, beta 1 (fibronectin receptor, beta polypeptide, antigen CD29 includes MDF2, MSK12)	3688	-4.28966	-9.62764	4.32e-09	3.45e-08
200704_at	LITAF	lipopolysaccharide-induced TNF factor	9516	-4.28747	-30.9755	8.14e-19	1.06e-16
227399_at	VGLL3	vestigial like 3 (Drosophila)	389136	-4.27685	-10.1755	1.67e-09	1.48e-08
203060_s_at	PAPSS2	3'-phosphoadenosine 5'-phosphosulfate synthase 2	9060	-4.27649	-14.639	2.19e-12	4.13e-11
208939_at	SEPHS1	selenophosphate synthetase 1	22929	-4.27198	-13.4044	1.15e-11	1.78e-10
227846_at	GPR176	G protein-coupled receptor 176	11245	-4.25658	-24.0016	1.39e-16	9.39e-15
203968_s_at	CDC6	cell division cycle 6 homolog (S. cerevisiae)	990	-4.25572	-11.5529	1.76e-10	2e-09
202546_at	VAMP8	vesicle-associated membrane protein 8 (endobrevin)	8673	-4.24892	-12.8842	2.39e-11	3.41e-10
209344_at	TPM4	tropomyosin 4	7171	-4.24372	-12.1894	6.63e-11	8.42e-10
216236_s_at	SLC2A14 /// SLC2A3	solute carrier family 2 (facilitated glucose transporter), member 14 /// solute carrier family 2 (facilitated glucose transporter), member 3	144195 /// 6515	-4.2417	-19.4173	9.31e-15	3.45e-13
239108_at	FAR2	Fatty acyl CoA reductase 2	55711	-4.22552	-11.3727	2.33e-10	2.58e-09
202886_s_at	PPP2R1B	protein phosphatase 2 (formerly 2A), regulatory subunit A, beta isoform	5519	-4.22522	-8.683	2.44e-08	1.63e-07
211906_s_at	SERPINB4	serpin peptidase inhibitor, clade B (ovalbumin), member 4	6318	-4.21762	-28.5097	4.36e-18	4.57e-16
227133_at	CXorf39	chromosome X open reading frame 39	139231	-4.21023	-10.5872	8.32e-10	7.99e-09
1562828_at	---	---	---	-4.20884	-19.4953	8.6e-15	3.22e-13
203023_at	NOP16	NOP16 nucleolar protein homolog (yeast)	51491	-4.19946	-12.1764	6.76e-11	8.57e-10
210715_s_at	SPINT2	serine peptidase inhibitor, Kunitz type, 2	10653	-4.19792	-27.9988	6.28e-18	6.36e-16
222458_s_at	AKIRIN1	akirin 1	79647	-4.19251	-10.3606	1.22e-09	1.12e-08
214581_x_at	TNFRSF21	tumor necrosis factor receptor superfamily, member 21	27242	-4.18479	-19.3774	9.69e-15	3.57e-13
228937_at	C13orf31	chromosome 13 open reading frame 31	144811	-4.1792	-15.9361	4.34e-13	1e-11
216266_s_at	ARFGEF1	ADP-ribosylation factor guanine nucleotide-exchange factor 1(brefeldin A-inhibited)	10565	-4.17871	-16.3592	2.62e-13	6.39e-12
203020_at	RABGAP1L	RAB GTPase activating protein 1-like	9910	-4.17774	-15.0603	1.28e-12	2.62e-11
201131_s_at	CDH1	cadherin 1, type 1, E-cadherin (epithelial)	999	-4.1706	-10.993	4.28e-10	4.42e-09
200951_s_at	CCND2	cyclin D2	894	-4.16682	-15.7416	5.49e-13	1.24e-11
218368_s_at	TNFRSF12A	tumor necrosis factor receptor superfamily, member 12A	51330	-4.15988	-15.0042	1.37e-12	2.78e-11
204235_s_at	GULP1	GULP, engulfment adaptor PTB domain containing 1	51454	-4.1594	-16.6207	1.93e-13	4.87e-12
222642_s_at	TMEM33	transmembrane protein 33	55161	-4.15873	-15.4586	7.77e-13	1.69e-11
224811_at	---	---	---	-4.15491	-17.6082	6.3e-14	1.84e-12
210091_s_at	DTNA	dystrobrevin, alpha	1837	-4.14665	-18.1871	3.36e-14	1.06e-12
226482_s_at	RP11-544M22.4	thiosulfate sulfurtransferase KAT, putative	100131187	-4.13799	-20.1797	4.36e-15	1.79e-13
210540_s_at	B4GALT4	UDP-Gal:betaGlcNAc beta 1,4- galactosyltransferase, polypeptide 4	8702	-4.13598	-18.7204	1.91e-14	6.49e-13
212828_at	SYNJ2	synaptojanin 2	8871	-4.12317	-12.8667	2.45e-11	3.49e-10
206932_at	CH25H	cholesterol 25-hydroxylase	9023	-4.11503	-24.6191	8.35e-17	6.01e-15
231325_at	UNC5D	Unc-5 homolog D (C. elegans)	137970	-4.10988	-15.2889	9.59e-13	2.03e-11
214591_at	KLHL4	kelch-like 4 (Drosophila)	56062	-4.10109	-15.6619	6.05e-13	1.35e-11
201831_s_at	USO1	USO1 homolog, vesicle docking protein (yeast)	8615	-4.09909	-14.2797	3.5e-12	6.27e-11
210612_s_at	SYNJ2	synaptojanin 2	8871	-4.09707	-23.0902	3.01e-16	1.83e-14
225496_s_at	SYTL2	synaptotagmin-like 2	54843	-4.09145	-13.7696	6.94e-12	1.14e-10
203510_at	MET	met proto-oncogene (hepatocyte growth factor receptor)	4233	-4.09109	-14.6167	2.25e-12	4.24e-11
216321_s_at	NR3C1	nuclear receptor subfamily 3, group C, member 1 (glucocorticoid receptor)	2908	-4.08363	-10.9743	4.41e-10	4.54e-09
222921_s_at	HEY2	hairy/enhancer-of-split related with YRPW motif 2	23493	-4.08219	-14.057	4.71e-12	8.1e-11
226789_at	EMB	embigin homolog (mouse)	133418	-4.07371	-13.8001	6.66e-12	1.1e-10
204059_s_at	ME1	malic enzyme 1, NADP(+)-dependent, cytosolic	4199	-4.07004	-17.6327	6.14e-14	1.8e-12
210643_at	TNFSF11	tumor necrosis factor (ligand) superfamily, member 11	8600	-4.06716	-22.2975	6.03e-16	3.31e-14
226498_at	---	---	---	-4.06656	-11.2333	2.91e-10	3.13e-09
209488_s_at	RBPMS	RNA binding protein with multiple splicing	11030	-4.0659	-10.7507	6.35e-10	6.28e-09
203058_s_at	PAPSS2	3'-phosphoadenosine 5'-phosphosulfate synthase 2	9060	-4.06306	-11.1908	3.11e-10	3.33e-09
1553678_a_at	ITGB1	integrin, beta 1 (fibronectin receptor, beta polypeptide, antigen CD29 includes MDF2, MSK12)	3688	-4.05733	-7.96122	9.89e-08	5.7e-07
224596_at	SLC44A1	solute carrier family 44, member 1	23446	-4.05387	-13.7193	7.44e-12	1.22e-10
228075_x_at	TFB1M	transcription factor B1, mitochondrial	51106	-4.04921	-19.9169	5.64e-15	2.22e-13
223908_at	HDAC8	histone deacetylase 8	55869	-4.0483	-22.6881	4.27e-16	2.47e-14
222487_s_at	RPS27L	ribosomal protein S27-like	51065	-4.04669	-9.45881	5.84e-09	4.52e-08
203967_at	CDC6	cell division cycle 6 homolog (S. cerevisiae)	990	-4.03274	-10.5647	8.64e-10	8.27e-09
214440_at	NAT1	N-acetyltransferase 1 (arylamine N-acetyltransferase)	9	-4.03228	-17.3688	8.22e-14	2.3e-12
224918_x_at	MGST1	microsomal glutathione S-transferase 1	4257	-4.02238	-24.8624	6.85e-17	5.06e-15
206025_s_at	TNFAIP6	tumor necrosis factor, alpha-induced protein 6	7130	-4.02134	-11.1354	3.4e-10	3.6e-09
225195_at	DPH3	DPH3, KTI11 homolog (S. cerevisiae)	285381	-4.01857	-22.7927	3.89e-16	2.28e-14
227517_s_at	GAS5	growth arrest-specific 5 (non-protein coding)	60674	-4.00164	-20.0094	5.15e-15	2.05e-13
1570098_at	---	---	---	-3.99944	-20.3626	3.65e-15	1.53e-13
219031_s_at	NIP7	nuclear import 7 homolog (S. cerevisiae)	51388	-3.99757	-16.7168	1.73e-13	4.44e-12
201302_at	ANXA4	annexin A4	307	-3.98627	-11.2937	2.64e-10	2.88e-09
219302_s_at	CNTNAP2	contactin associated protein-like 2	26047	-3.98223	-17.9951	4.13e-14	1.28e-12
206023_at	NMU	neuromedin U	10874	-3.98044	-16.4375	2.39e-13	5.88e-12
209457_at	DUSP5	dual specificity phosphatase 5	1847	-3.97875	-19.4106	9.37e-15	3.47e-13
231736_x_at	MGST1	microsomal glutathione S-transferase 1	4257	-3.97728	-19.0079	1.41e-14	5.02e-13
242277_at	---	---	---	-3.97693	-11.6268	1.57e-10	1.81e-09
209094_at	DDAH1	dimethylarginine dimethylaminohydrolase 1	23576	-3.97097	-18.2932	3e-14	9.61e-13
239781_at	hCG_1815504	hCG1815504	440132	-3.9682	-17.3936	8e-14	2.25e-12
222825_at	OTUD6B	OTU domain containing 6B	51633	-3.96083	-9.85051	2.92e-09	2.43e-08
209487_at	RBPMS	RNA binding protein with multiple splicing	11030	-3.95926	-22.3743	5.63e-16	3.13e-14
205371_s_at	DBT	dihydrolipoamide branched chain transacylase E2	1629	-3.95885	-22.0706	7.39e-16	3.95e-14
221765_at	UGCG	UDP-glucose ceramide glucosyltransferase	7357	-3.95684	-9.49195	5.51e-09	4.28e-08
209296_at	PPM1B	protein phosphatase 1B (formerly 2C), magnesium-dependent, beta isoform	5495	-3.95302	-15.2615	9.92e-13	2.1e-11
209147_s_at	PPAP2A	phosphatidic acid phosphatase type 2A	8611	-3.94485	-25.6892	3.55e-17	2.85e-15
226354_at	LACTB	lactamase, beta	114294	-3.94179	-19.4693	8.83e-15	3.3e-13
225162_at	SH3D19	SH3 domain containing 19	152503	-3.93187	-13.6529	8.14e-12	1.31e-10
204935_at	PTPN2	protein tyrosine phosphatase, non-receptor type 2	5771	-3.92482	-12.9909	2.05e-11	2.98e-10
210026_s_at	CARD10	caspase recruitment domain family, member 10	29775	-3.91865	-18.4481	2.54e-14	8.32e-13
230490_x_at	RSU1	Ras suppressor protein 1	6251	-3.91839	-15.02	1.34e-12	2.73e-11
202043_s_at	SMS	spermine synthase	6611	-3.91078	-19.3162	1.03e-14	3.76e-13
206801_at	NPPB	natriuretic peptide precursor B	4879	-3.91041	-8.11097	7.36e-08	4.35e-07
223773_s_at	SNHG12	small nucleolar RNA host gene 12 (non-protein coding)	85028	-3.90652	-17.7544	5.37e-14	1.6e-12
226107_at	---	---	---	-3.90328	-12.1341	7.21e-11	9.07e-10
202719_s_at	TES	testis derived transcript (3 LIM domains)	26136	-3.90198	-15.1602	1.13e-12	2.34e-11
228109_at	RASGRF2	Ras protein-specific guanine nucleotide-releasing factor 2	5924	-3.90098	-20.0018	5.19e-15	2.06e-13
206442_at	SEMG1	semenogelin I	6406	-3.89947	-25.8891	3.04e-17	2.52e-15
235177_at	FAM119A	family with sequence similarity 119, member A	151194	-3.89641	-17.5469	6.75e-14	1.95e-12
201196_s_at	AMD1	adenosylmethionine decarboxylase 1	262	-3.89614	-10.5213	9.29e-10	8.81e-09
234915_s_at	DENR	density-regulated protein	8562	-3.89425	-15.5256	7.15e-13	1.58e-11
227167_s_at	---	---	---	-3.88694	-19.058	1.34e-14	4.79e-13
224618_at	ROD1	ROD1 regulator of differentiation 1 (S. pombe)	9991	-3.88181	-11.6105	1.61e-10	1.85e-09
210568_s_at	RECQL	RecQ protein-like (DNA helicase Q1-like)	5965	-3.86916	-5.08475	5.13e-05	0.000168397
209772_s_at	CD24	CD24 molecule	100133941	-3.86705	-6.1416	4.58e-06	1.86e-05
226279_at	PRSS23	protease, serine, 23	11098	-3.85897	-11.3981	2.24e-10	2.49e-09
1553994_at	NT5E	5'-nucleotidase, ecto (CD73)	4907	-3.84964	-23.0781	3.04e-16	1.85e-14
238846_at	TNFRSF11A	tumor necrosis factor receptor superfamily, member 11a, NFKB activator	8792	-3.83738	-17.537	6.82e-14	1.97e-12
237145_at	EIF2AK4	eukaryotic translation initiation factor 2 alpha kinase 4	440275	-3.83617	-20.1682	4.41e-15	1.8e-13
221770_at	RPE	ribulose-5-phosphate-3-epimerase	6120	-3.83312	-15.4578	7.77e-13	1.69e-11
224169_at	NPFFR2	neuropeptide FF receptor 2	10886	-3.83033	-16.1556	3.33e-13	7.94e-12
204079_at	TPST2	tyrosylprotein sulfotransferase 2	8459	-3.82853	-14.9117	1.54e-12	3.07e-11
215594_at	---	---	---	-3.81768	-23.4011	2.3e-16	1.45e-14
226600_at	TMTC3	transmembrane and tetratricopeptide repeat containing 3	160418	-3.81416	-12.3964	4.87e-11	6.4e-10
228542_at	MRS2	MRS2 magnesium homeostasis factor homolog (S. cerevisiae)	57380	-3.81014	-12.1355	7.19e-11	9.05e-10
201951_at	ALCAM	activated leukocyte cell adhesion molecule	214	-3.80974	-10.8718	5.21e-10	5.26e-09
202543_s_at	GMFB	glia maturation factor, beta	2764	-3.80208	-13.1539	1.63e-11	2.44e-10
213869_x_at	THY1	Thy-1 cell surface antigen	7070	-3.79695	-19.6646	7.26e-15	2.78e-13
214751_at	ZNF468	zinc finger protein 468	90333	-3.7958	-14.3828	3.06e-12	5.55e-11
227276_at	PLXDC2	plexin domain containing 2	84898	-3.7934	-15.9014	4.52e-13	1.04e-11
202874_s_at	ATP6V1C1	ATPase, H+ transporting, lysosomal 42kDa, V1 subunit C1	528	-3.7887	-20.883	2.21e-15	1e-13
213822_s_at	UBE3B	ubiquitin protein ligase E3B	89910	-3.78663	-16.6206	1.93e-13	4.87e-12
203372_s_at	SOCS2	suppressor of cytokine signaling 2	8835	-3.78541	-10.8135	5.73e-10	5.74e-09
202446_s_at	PLSCR1	phospholipid scramblase 1	5359	-3.77874	-19.6943	7.04e-15	2.7e-13
224480_s_at	AGPAT9	1-acylglycerol-3-phosphate O-acyltransferase 9	84803	-3.77846	-18.1639	3.44e-14	1.08e-12
209015_s_at	DNAJB6	DnaJ (Hsp40) homolog, subfamily B, member 6	10049	-3.77528	-22.711	4.18e-16	2.43e-14
205401_at	AGPS	alkylglycerone phosphate synthase	8540	-3.7697	-7.22992	4.38e-07	2.19e-06
219681_s_at	RAB11FIP1	RAB11 family interacting protein 1 (class I)	80223	-3.76014	-22.9977	3.26e-16	1.96e-14
210427_x_at	ANXA2	annexin A2	302	-3.75919	-22.3137	5.95e-16	3.27e-14
218194_at	REXO2	REX2, RNA exonuclease 2 homolog (S. cerevisiae)	25996	-3.75482	-24.0304	1.35e-16	9.22e-15
201301_s_at	ANXA4	annexin A4	307	-3.75215	-18.9499	1.5e-14	5.29e-13
218349_s_at	ZWILCH	Zwilch, kinetochore associated, homolog (Drosophila)	55055	-3.7501	-11.6307	1.56e-10	1.8e-09
203453_at	SCNN1A	sodium channel, nonvoltage-gated 1 alpha	6337	-3.74924	-16.0575	3.75e-13	8.75e-12
202241_at	TRIB1	tribbles homolog 1 (Drosophila)	10221	-3.7491	-13.18	1.57e-11	2.36e-10
223225_s_at	SEH1L	SEH1-like (S. cerevisiae)	81929	-3.74473	-16.5738	2.04e-13	5.1e-12
220549_at	RAD54B	RAD54 homolog B (S. cerevisiae)	25788	-3.74439	-16.2549	2.96e-13	7.14e-12
235141_at	MARVELD2	MARVEL domain containing 2	153562	-3.73971	-17.8117	5.04e-14	1.52e-12
209406_at	BAG2	BCL2-associated athanogene 2	9532	-3.73866	-18.9071	1.57e-14	5.49e-13
232914_s_at	SYTL2	synaptotagmin-like 2	54843	-3.7371	-15.5831	6.66e-13	1.48e-11
226591_at	SNRPN	small nuclear ribonucleoprotein polypeptide N	6638	-3.73369	-12.8104	2.66e-11	3.74e-10
203622_s_at	PNO1	partner of NOB1 homolog (S. cerevisiae)	56902	-3.73001	-22.7028	4.21e-16	2.44e-14
230379_x_at	C2orf56	chromosome 2 open reading frame 56	55471	-3.71919	-17.4188	7.78e-14	2.2e-12
216867_s_at	PDGFA	platelet-derived growth factor alpha polypeptide	5154	-3.70956	-14.6951	2.04e-12	3.89e-11
204237_at	GULP1	GULP, engulfment adaptor PTB domain containing 1	51454	-3.69791	-22.0331	7.65e-16	4.04e-14
1558014_s_at	FAR1	fatty acyl CoA reductase 1	84188	-3.68517	-4.26619	0.000353731	0.000982482
202686_s_at	AXL	AXL receptor tyrosine kinase	558	-3.68234	-14.4072	2.96e-12	5.4e-11
236692_at	LOC729839	hypothetical LOC729839	729839	-3.67286	-18.954	1.5e-14	5.27e-13
229566_at	LOC645638	similar to WDNM1-like protein	645638	-3.66805	-23.5024	2.11e-16	1.36e-14
204421_s_at	FGF2	fibroblast growth factor 2 (basic)	2247	-3.66665	-15.3576	8.8e-13	1.88e-11
202195_s_at	TMED5	transmembrane emp24 protein transport domain containing 5	50999	-3.66662	-14.1115	4.38e-12	7.62e-11
1552263_at	MAPK1	mitogen-activated protein kinase 1	5594	-3.66482	-16.6816	1.8e-13	4.58e-12
1555225_at	C1orf43	chromosome 1 open reading frame 43	25912	-3.66078	-15.2279	1.03e-12	2.18e-11
213503_x_at	ANXA2	annexin A2	302	-3.66071	-25.039	5.95e-17	4.45e-15
220275_at	CUZD1	CUB and zona pellucida-like domains 1	50624	-3.6599	-18.9225	1.54e-14	5.41e-13
1552634_a_at	ZNF101	zinc finger protein 101	94039	-3.65987	-20.199	4.28e-15	1.76e-13
201955_at	CCNC	cyclin C	892	-3.65832	-16.7479	1.67e-13	4.31e-12
206654_s_at	POLR3G	polymerase (RNA) III (DNA directed) polypeptide G (32kD)	10622	-3.65821	-19.278	1.07e-14	3.88e-13
221553_at	MAGT1	magnesium transporter 1	84061	-3.65477	-11.5412	1.79e-10	2.03e-09
209209_s_at	FERMT2	fermitin family homolog 2 (Drosophila)	10979	-3.65356	-6.43721	2.39e-06	1.02e-05
235258_at	DCP2	DCP2 decapping enzyme homolog (S. cerevisiae)	167227	-3.64504	-10.834	5.54e-10	5.57e-09
202854_at	HPRT1	hypoxanthine phosphoribosyltransferase 1	3251	-3.64394	-18.7903	1.77e-14	6.11e-13
223403_s_at	POLR1B	polymerase (RNA) I polypeptide B, 128kDa	84172	-3.64227	-13.5118	9.89e-12	1.56e-10
214155_s_at	LARP4	La ribonucleoprotein domain family, member 4	113251	-3.63488	-10.09	1.93e-09	1.68e-08
201590_x_at	ANXA2	annexin A2	302	-3.62738	-26.3413	2.15e-17	1.85e-15
226485_at	FLJ20674	hypothetical protein FLJ20674	54621	-3.62343	-16.9013	1.4e-13	3.65e-12
211671_s_at	NR3C1	nuclear receptor subfamily 3, group C, member 1 (glucocorticoid receptor)	2908	-3.61917	-10.2784	1.4e-09	1.27e-08
1567107_s_at	TPM4	tropomyosin 4	7171	-3.61533	-11.7528	1.29e-10	1.52e-09
225816_at	PHF17	PHD finger protein 17	79960	-3.61521	-24.9107	6.59e-17	4.89e-15
204728_s_at	WDHD1	WD repeat and HMG-box DNA binding protein 1	11169	-3.60849	-7.68578	1.72e-07	9.35e-07
226803_at	CHMP4C	chromatin modifying protein 4C	92421	-3.60844	-17.2378	9.53e-14	2.63e-12
219343_at	CDC37L1	cell division cycle 37 homolog (S. cerevisiae)-like 1	55664	-3.60403	-11.4114	2.19e-10	2.44e-09
235148_at	KRTCAP3	keratinocyte associated protein 3	200634	-3.60356	-21.5047	1.24e-15	6.13e-14
220615_s_at	FAR2	fatty acyl CoA reductase 2	55711	-3.60085	-18.4397	2.56e-14	8.38e-13
228952_at	ENPP1	ectonucleotide pyrophosphatase/phosphodiesterase 1	5167	-3.59553	-13.9048	5.78e-12	9.65e-11
216228_s_at	WDHD1	WD repeat and HMG-box DNA binding protein 1	11169	-3.59288	-8.5415	3.19e-08	2.07e-07
222802_at	EDN1	endothelin 1	1906	-3.5927	-21.9636	8.14e-16	4.28e-14
215177_s_at	ITGA6	integrin, alpha 6	3655	-3.58502	-7.42352	2.94e-07	1.52e-06
204727_at	WDHD1	WD repeat and HMG-box DNA binding protein 1	11169	-3.58276	-10.3774	1.18e-09	1.09e-08
242727_at	ARL5B	ADP-ribosylation factor-like 5B	221079	-3.58134	-8.5912	2.91e-08	1.91e-07
231269_at	ASCC3	activating signal cointegrator 1 complex subunit 3	10973	-3.57669	-14.0896	4.51e-12	7.8e-11
210840_s_at	IQGAP1	IQ motif containing GTPase activating protein 1	8826	-3.57608	-11.2982	2.62e-10	2.86e-09
214544_s_at	SNAP23	synaptosomal-associated protein, 23kDa	8773	-3.57566	-14.8114	1.75e-12	3.41e-11
1552736_a_at	NETO1	neuropilin (NRP) and tolloid (TLL)-like 1	81832	-3.57506	-17.6922	5.75e-14	1.7e-12
232278_s_at	DEPDC1	DEP domain containing 1	55635	-3.57326	-6.65783	1.48e-06	6.61e-06
209071_s_at	RGS5	regulator of G-protein signaling 5	8490	-3.57044	-25.9178	2.97e-17	2.47e-15
235737_at	TSLP	thymic stromal lymphopoietin	85480	-3.56879	-20.1234	4.61e-15	1.87e-13
227492_at	---	---	---	-3.55035	-20.7279	2.57e-15	1.14e-13
226538_at	MAN2A1	mannosidase, alpha, class 2A, member 1	4124	-3.54823	-15.1415	1.15e-12	2.39e-11
235484_at	PTAR1	protein prenyltransferase alpha subunit repeat containing 1	375743	-3.54794	-6.9975	7.14e-07	3.42e-06
235059_at	RAB12	RAB12, member RAS oncogene family	201475	-3.54676	-5.33734	2.85e-05	9.87e-05
207076_s_at	ASS1	argininosuccinate synthetase 1	445	-3.5457	-19.7926	6.39e-15	2.48e-13
217764_s_at	RAB31	RAB31, member RAS oncogene family	11031	-3.5454	-19.3954	9.52e-15	3.51e-13
204726_at	CDH13	cadherin 13, H-cadherin (heart)	1012	-3.54019	-14.5361	2.5e-12	4.64e-11
232254_at	---	---	---	-3.53593	-16.0986	3.57e-13	8.42e-12
200931_s_at	VCL	vinculin	7414	-3.53556	-18.0607	3.85e-14	1.2e-12
218035_s_at	RBM47	RNA binding motif protein 47	54502	-3.53424	-13.212	1.5e-11	2.26e-10
215011_at	SNHG3	small nucleolar RNA host gene 3 (non-protein coding)	8420	-3.53052	-20.6358	2.8e-15	1.22e-13
217790_s_at	SSR3	signal sequence receptor, gamma (translocon-associated protein gamma)	6747	-3.5293	-8.08962	7.67e-08	4.52e-07
239155_at	CXADRP1	coxsackie virus and adenovirus receptor pseudogene 1	653108	-3.5274	-18.4478	2.54e-14	8.32e-13
236420_s_at	ANO4	anoctamin 4	121601	-3.52691	-13.1082	1.74e-11	2.58e-10
212110_at	SLC39A14	solute carrier family 39 (zinc transporter), member 14	23516	-3.5233	-12.8176	2.63e-11	3.71e-10
203705_s_at	FZD7	frizzled homolog 7 (Drosophila)	8324	-3.52009	-15.2957	9.51e-13	2.02e-11
201739_at	SGK1	serum/glucocorticoid regulated kinase 1	6446	-3.51758	-12.4909	4.24e-11	5.68e-10
1552897_a_at	KCNG3	potassium voltage-gated channel, subfamily G, member 3	170850	-3.5149	-17.4905	7.18e-14	2.05e-12
235126_at	LQK1	hypothetical LOC642946	642946	-3.51455	-16.329	2.71e-13	6.6e-12
219806_s_at	C11orf75	chromosome 11 open reading frame 75	56935	-3.51406	-21.2851	1.52e-15	7.28e-14
213446_s_at	IQGAP1	IQ motif containing GTPase activating protein 1	8826	-3.50979	-11.0729	3.76e-10	3.95e-09
212812_at	---	---	---	-3.50964	-17.3129	8.76e-14	2.43e-12
205105_at	MAN2A1	mannosidase, alpha, class 2A, member 1	4124	-3.50778	-14.3887	3.03e-12	5.51e-11
208851_s_at	THY1	Thy-1 cell surface antigen	7070	-3.50566	-14.934	1.5e-12	3e-11
203178_at	GATM	glycine amidinotransferase (L-arginine:glycine amidinotransferase)	2628	-3.50341	-11.7783	1.24e-10	1.47e-09
206756_at	CHST7	carbohydrate (N-acetylglucosamine 6-O) sulfotransferase 7	56548	-3.50182	-18.2685	3.08e-14	9.8e-13
236576_at	---	---	---	-3.50066	-21.5572	1.18e-15	5.85e-14
212077_at	CALD1	caldesmon 1	800	-3.49876	-12.2799	5.79e-11	7.47e-10
222582_at	PRKAG2	protein kinase, AMP-activated, gamma 2 non-catalytic subunit	51422	-3.49546	-13.0357	1.93e-11	2.82e-10
219099_at	C12orf5	chromosome 12 open reading frame 5	57103	-3.49523	-17.3372	8.52e-14	2.37e-12
1560652_at	---	---	---	-3.49499	-10.6393	7.63e-10	7.39e-09
225314_at	OCIAD2	OCIA domain containing 2	132299	-3.49122	-25.6852	3.57e-17	2.86e-15
201512_s_at	TOMM70A	translocase of outer mitochondrial membrane 70 homolog A (S. cerevisiae)	9868	-3.49012	-16.2524	2.97e-13	7.16e-12
214649_s_at	MTMR2	myotubularin related protein 2	8898	-3.48113	-7.67085	1.77e-07	9.6e-07
226136_at	GLIPR1	GLI pathogenesis-related 1	11010	-3.47877	-16.0986	3.57e-13	8.42e-12
208653_s_at	CD164	CD164 molecule, sialomucin	8763	-3.47867	-10.7458	6.4e-10	6.32e-09
204490_s_at	CD44	CD44 molecule (Indian blood group)	960	-3.47723	-18.0932	3.71e-14	1.16e-12
202660_at	ITPR2	inositol 1,4,5-triphosphate receptor, type 2	3709	-3.47557	-9.9193	2.59e-09	2.18e-08
202345_s_at	FABP5	fatty acid binding protein 5 (psoriasis-associated)	2171	-3.47551	-18.5963	2.17e-14	7.3e-13
221664_s_at	F11R	F11 receptor	50848	-3.47543	-13.4161	1.13e-11	1.76e-10
224595_at	SLC44A1	solute carrier family 44, member 1	23446	-3.47519	-10.3905	1.16e-09	1.07e-08
226452_at	PDK1	pyruvate dehydrogenase kinase, isozyme 1	5163	-3.47266	-10.0081	2.22e-09	1.91e-08
218353_at	RGS5	regulator of G-protein signaling 5	8490	-3.46705	-14.508	2.6e-12	4.79e-11
201162_at	IGFBP7	insulin-like growth factor binding protein 7	3490	-3.46652	-15.1039	1.21e-12	2.49e-11
221782_at	DNAJC10	DnaJ (Hsp40) homolog, subfamily C, member 10	54431	-3.46443	-5.72586	1.17e-05	4.37e-05
230047_at	FLJ32810	Rho-type GTPase-activating protein FLJ32810	143872	-3.46408	-10.2018	1.59e-09	1.42e-08
228370_at	SNRPN	small nuclear ribonucleoprotein polypeptide N	6638	-3.46375	-11.2711	2.74e-10	2.97e-09
222496_s_at	RBM47	RNA binding motif protein 47	54502	-3.46307	-10.7332	6.54e-10	6.44e-09
1554283_at	CCRN4L	CCR4 carbon catabolite repression 4-like (S. cerevisiae)	25819	-3.46159	-18.5621	2.25e-14	7.53e-13
237034_at	---	---	---	-3.46053	-14.4575	2.77e-12	5.07e-11
204326_x_at	MT1X	metallothionein 1X	4501	-3.45848	-16.3219	2.74e-13	6.65e-12
221027_s_at	PLA2G12A	phospholipase A2, group XIIA	81579	-3.45811	-14.777	1.83e-12	3.56e-11
227084_at	DTNA	dystrobrevin, alpha	1837	-3.45666	-19.5691	7.99e-15	3.02e-13
225958_at	PHC1	polyhomeotic homolog 1 (Drosophila)	1911	-3.45615	-15.4969	7.41e-13	1.62e-11
201195_s_at	SLC7A5	solute carrier family 7 (cationic amino acid transporter, y+ system), member 5	8140	-3.45317	-19.2948	1.05e-14	3.83e-13
222392_x_at	PERP	PERP, TP53 apoptosis effector	64065	-3.45014	-13.4742	1.04e-11	1.64e-10
223361_at	C6orf115	chromosome 6 open reading frame 115	58527	-3.45002	-26.4529	1.97e-17	1.73e-15
211864_s_at	MYOF	myoferlin	26509	-3.43227	-11.966	9.29e-11	1.13e-09
222698_s_at	IMPACT	Impact homolog (mouse)	55364	-3.43134	-10.3062	1.33e-09	1.22e-08
222154_s_at	LOC26010	viral DNA polymerase-transactivated protein 6	26010	-3.4297	-24.3294	1.06e-16	7.41e-15
227372_s_at	BAIAP2L1	BAI1-associated protein 2-like 1	55971	-3.42705	-11.9541	9.46e-11	1.15e-09
213849_s_at	PPP2R2B	protein phosphatase 2 (formerly 2A), regulatory subunit B, beta isoform	5521	-3.42664	-14.3853	3.05e-12	5.53e-11
205091_x_at	RECQL	RecQ protein-like (DNA helicase Q1-like)	5965	-3.42232	-5.82885	9.25e-06	3.53e-05
1552485_at	LACTB	lactamase, beta	114294	-3.41848	-14.689	2.05e-12	3.91e-11
219347_at	NUDT15	nudix (nucleoside diphosphate linked moiety X)-type motif 15	55270	-3.4137	-27.8215	7.14e-18	7.05e-16
227928_at	C12orf48	chromosome 12 open reading frame 48	55010	-3.41292	-8.38682	4.3e-08	2.7e-07
226545_at	CD109	CD109 molecule	135228	-3.41286	-14.4262	2.89e-12	5.27e-11
229518_at	FAM46B	family with sequence similarity 46, member B	115572	-3.41017	-14.2026	3.88e-12	6.85e-11
239148_at	MARVELD3	MARVEL domain containing 3	91862	-3.40966	-14.7986	1.78e-12	3.46e-11
201578_at	PODXL	podocalyxin-like	5420	-3.40559	-16.9694	1.29e-13	3.43e-12
222837_s_at	NARG1	NMDA receptor regulated 1	80155	-3.40257	-8.68897	2.41e-08	1.62e-07
223962_at	TTC29	tetratricopeptide repeat domain 29	83894	-3.39778	-13.0153	1.98e-11	2.89e-10
223599_at	TRIM6	tripartite motif-containing 6	117854	-3.39292	-10.357	1.22e-09	1.13e-08
230574_at	LOC100130938	hypothetical protein LOC100130938	100130938	-3.39236	-14.1091	4.39e-12	7.64e-11
201160_s_at	CSDA	cold shock domain protein A	8531	-3.3865	-21.7028	1.03e-15	5.26e-14
219976_at	HOOK1	hook homolog 1 (Drosophila)	51361	-3.38578	-12.635	3.43e-11	4.71e-10
203098_at	CDYL	chromodomain protein, Y-like	9425	-3.38527	-17.6132	6.27e-14	1.83e-12
226784_at	TWISTNB	TWIST neighbor	221830	-3.38242	-7.65187	1.84e-07	9.94e-07
208816_x_at	ANXA2P2	annexin A2 pseudogene 2	304	-3.38219	-30.2816	1.29e-18	1.56e-16
202724_s_at	FOXO1	forkhead box O1	2308	-3.37933	-13.7434	7.2e-12	1.18e-10
210987_x_at	TPM1	tropomyosin 1 (alpha)	7168	-3.378	-19.9098	5.68e-15	2.24e-13
227068_at	PGK1	phosphoglycerate kinase 1	5230	-3.37566	-16.1978	3.17e-13	7.59e-12
231310_at	---	---	---	-3.37257	-21.8947	8.67e-16	4.49e-14
213010_at	PRKCDBP	protein kinase C, delta binding protein	112464	-3.37092	-11.9313	9.8e-11	1.19e-09
202763_at	CASP3	caspase 3, apoptosis-related cysteine peptidase	836	-3.37	-12.1113	7.46e-11	9.33e-10
242751_at	---	---	---	-3.36971	-10.9458	4.62e-10	4.73e-09
1554628_at	ZNF57	zinc finger protein 57	126295	-3.36816	-12.4527	4.48e-11	5.97e-10
201772_at	AZIN1	antizyme inhibitor 1	51582	-3.36681	-8.67134	2.5e-08	1.66e-07
1552619_a_at	ANLN	anillin, actin binding protein	54443	-3.36477	-7.15863	5.09e-07	2.51e-06
224444_s_at	C1orf97	chromosome 1 open reading frame 97	84791	-3.36456	-13.882	5.96e-12	9.91e-11
230493_at	SHISA2	shisa homolog 2 (Xenopus laevis)	387914	-3.36343	-12.8662	2.46e-11	3.49e-10
201944_at	HEXB	hexosaminidase B (beta polypeptide)	3074	-3.36102	-18.3451	2.83e-14	9.13e-13
233297_s_at	C13orf38	chromosome 13 open reading frame 38	728591	-3.35274	-13.957	5.39e-12	9.08e-11
201832_s_at	USO1	USO1 homolog, vesicle docking protein (yeast)	8615	-3.35236	-10.5982	8.17e-10	7.85e-09
217997_at	PHLDA1	pleckstrin homology-like domain, family A, member 1	22822	-3.35164	-10.2619	1.44e-09	1.3e-08
219169_s_at	TFB1M	transcription factor B1, mitochondrial	51106	-3.35085	-17.9226	4.47e-14	1.37e-12
225660_at	SEMA6A	sema domain, transmembrane domain (TM), and cytoplasmic domain, (semaphorin) 6A	57556	-3.34848	-8.50402	3.43e-08	2.21e-07
219936_s_at	GPR87	G protein-coupled receptor 87	53836	-3.34814	-15.9987	4.02e-13	9.33e-12
228069_at	FAM54A	family with sequence similarity 54, member A	113115	-3.34171	-11.2053	3.04e-10	3.26e-09
227322_s_at	BCCIP	BRCA2 and CDKN1A interacting protein	56647	-3.34042	-23.0262	3.18e-16	1.92e-14
202458_at	PRSS23	protease, serine, 23	11098	-3.33706	-23.8915	1.52e-16	1.01e-14
202558_s_at	HSPA13	heat shock protein 70kDa family, member 13	6782	-3.33414	-5.05253	5.53e-05	0.000180717
221666_s_at	PYCARD	PYD and CARD domain containing	29108	-3.33185	-12.2088	6.44e-11	8.22e-10
214085_x_at	GLIPR1	GLI pathogenesis-related 1	11010	-3.33032	-17.0956	1.12e-13	3.02e-12
216044_x_at	FAM69A	family with sequence similarity 69, member A	388650	-3.32921	-10.3285	1.28e-09	1.18e-08
1557369_a_at	LOC285401	hypothetical LOC285401	285401	-3.32853	-17.1718	1.03e-13	2.8e-12
217127_at	CTH	cystathionase (cystathionine gamma-lyase)	1491	-3.32682	-14.7551	1.89e-12	3.65e-11
201161_s_at	CSDA	cold shock domain protein A	8531	-3.32673	-19.303	1.05e-14	3.81e-13
202697_at	NUDT21	nudix (nucleoside diphosphate linked moiety X)-type motif 21	11051	-3.32607	-14.4749	2.71e-12	4.97e-11
210935_s_at	WDR1	WD repeat domain 1	9948	-3.32602	-8.97204	1.42e-08	1.01e-07
1552678_a_at	USP28	ubiquitin specific peptidase 28	57646	-3.32565	-9.32556	7.43e-09	5.6e-08
219155_at	PITPNC1	phosphatidylinositol transfer protein, cytoplasmic 1	26207	-3.32286	-18.8071	1.74e-14	6.01e-13
204781_s_at	FAS	Fas (TNF receptor superfamily, member 6)	355	-3.32124	-20.148	4.5e-15	1.83e-13
203765_at	GCA	grancalcin, EF-hand calcium binding protein	25801	-3.32111	-15.6143	6.41e-13	1.43e-11
210868_s_at	ELOVL6	ELOVL family member 6, elongation of long chain fatty acids (FEN1/Elo2, SUR4/Elo3-like, yeast)	79071	-3.31771	-10.1851	1.64e-09	1.46e-08
212660_at	PHF15	PHD finger protein 15	23338	-3.317	-22.035	7.63e-16	4.04e-14
201522_x_at	SNRPN /// SNURF	small nuclear ribonucleoprotein polypeptide N /// SNRPN upstream reading frame	6638 /// 8926	-3.31457	-20.964	2.05e-15	9.41e-14
225040_s_at	RPE	ribulose-5-phosphate-3-epimerase	6120	-3.31394	-8.20503	6.12e-08	3.7e-07
225039_at	RPE	ribulose-5-phosphate-3-epimerase	6120	-3.31247	-10.27	1.42e-09	1.28e-08
234491_s_at	SAV1	salvador homolog 1 (Drosophila)	60485	-3.31032	-10.6827	7.1e-10	6.94e-09
229826_at	LOC440957	similar to CG32736-PA	440957	-3.30776	-10.2067	1.58e-09	1.41e-08
211015_s_at	HSPA4	heat shock 70kDa protein 4	3308	-3.30249	-11.307	2.59e-10	2.82e-09
204423_at	MKLN1	muskelin 1, intracellular mediator containing kelch motifs	4289	-3.29815	-12.4873	4.26e-11	5.71e-10
220172_at	C2orf37	chromosome 2 open reading frame 37	80067	-3.29769	-8.6996	2.37e-08	1.59e-07
230205_at	ZNF561	zinc finger protein 561	93134	-3.29718	-10.6256	7.81e-10	7.54e-09
232636_at	SLITRK4	SLIT and NTRK-like family, member 4	139065	-3.29687	-8.66844	2.51e-08	1.67e-07
227177_at	CORO2A	coronin, actin binding protein, 2A	7464	-3.29392	-13.9101	5.74e-12	9.59e-11
218627_at	DRAM	damage-regulated autophagy modulator	55332	-3.29343	-16.8639	1.46e-13	3.81e-12
223136_at	AIG1	androgen-induced 1	51390	-3.29233	-16.7526	1.66e-13	4.29e-12
201939_at	PLK2	polo-like kinase 2 (Drosophila)	10769	-3.29024	-12.6097	3.56e-11	4.87e-10
235088_at	C4orf46	chromosome 4 open reading frame 46	201725	-3.28723	-7.11485	5.58e-07	2.73e-06
241826_x_at	ZNF738	zinc finger protein 738	148203	-3.28684	-11.7227	1.35e-10	1.59e-09
221933_at	NLGN4X	neuroligin 4, X-linked	57502	-3.28528	-15.8203	4.99e-13	1.13e-11
220060_s_at	C12orf48	chromosome 12 open reading frame 48	55010	-3.28396	-8.62839	2.71e-08	1.79e-07
228441_s_at	---	---	---	-3.28019	-13.2242	1.48e-11	2.23e-10
225106_s_at	OGFOD1	2-oxoglutarate and iron-dependent oxygenase domain containing 1	55239	-3.27378	-11.5329	1.81e-10	2.06e-09
210986_s_at	TPM1	tropomyosin 1 (alpha)	7168	-3.27369	-20.7926	2.41e-15	1.08e-13
212311_at	KIAA0746	KIAA0746 protein	23231	-3.27215	-10.947	4.61e-10	4.72e-09
204832_s_at	BMPR1A	bone morphogenetic protein receptor, type IA	657	-3.26869	-7.34166	3.48e-07	1.77e-06
217763_s_at	RAB31	RAB31, member RAS oncogene family	11031	-3.26118	-13.9582	5.38e-12	9.07e-11
212154_at	SDC2	syndecan 2	6383	-3.26009	-20.1649	4.42e-15	1.81e-13
223737_x_at	CHST9	carbohydrate (N-acetylgalactosamine 4-0) sulfotransferase 9	83539	-3.25995	-13.0171	1.98e-11	2.88e-10
239231_at	---	---	---	-3.25654	-18.7729	1.81e-14	6.2e-13
214011_s_at	NOP16	NOP16 nucleolar protein homolog (yeast)	51491	-3.24895	-12.252	6.04e-11	7.76e-10
203725_at	GADD45A	growth arrest and DNA-damage-inducible, alpha	1647	-3.2483	-17.9468	4.35e-14	1.34e-12
205769_at	SLC27A2	solute carrier family 27 (fatty acid transporter), member 2	11001	-3.2473	-15.3739	8.63e-13	1.85e-11
202272_s_at	FBXO28	F-box protein 28	23219	-3.24659	-11.3471	2.43e-10	2.67e-09
204048_s_at	PHACTR2	phosphatase and actin regulator 2	9749	-3.24617	-17.0374	1.2e-13	3.21e-12
235117_at	CHAC2	ChaC, cation transport regulator homolog 2 (E. coli)	494143	-3.24598	-21.9628	8.15e-16	4.28e-14
227291_s_at	BOLA3	bolA homolog 3 (E. coli)	388962	-3.24392	-15.5095	7.29e-13	1.6e-11
201990_s_at	CREBL2	cAMP responsive element binding protein-like 2	1389	-3.23774	-8.51788	3.34e-08	2.16e-07
221826_at	ANGEL2	angel homolog 2 (Drosophila)	90806	-3.23629	-13.2643	1.4e-11	2.12e-10
244487_at	---	---	---	-3.23605	-7.8566	1.22e-07	6.88e-07
203007_x_at	LYPLA1	lysophospholipase I	10434	-3.23386	-6.55309	1.85e-06	8.12e-06
205229_s_at	COCH	coagulation factor C homolog, cochlin (Limulus polyphemus)	1690	-3.22963	-11.8297	1.14e-10	1.37e-09
242283_at	DNAH14	dynein, axonemal, heavy chain 14	127602	-3.22949	-17.3417	8.48e-14	2.36e-12
201862_s_at	LRRFIP1	leucine rich repeat (in FLII) interacting protein 1	9208	-3.22775	-7.71405	1.62e-07	8.9e-07
231808_at	LOC729082	hypothetical protein LOC729082	729082	-3.22735	-17.1113	1.1e-13	2.97e-12
224654_at	DDX21	DEAD (Asp-Glu-Ala-Asp) box polypeptide 21	9188	-3.22267	-19.8408	6.09e-15	2.37e-13
212378_at	GART	phosphoribosylglycinamide formyltransferase, phosphoribosylglycinamide synthetase, phosphoribosylaminoimidazole synthetase	2618	-3.21869	-13.1322	1.68e-11	2.51e-10
241036_at	---	---	---	-3.21699	-11.248	2.84e-10	3.07e-09
1556165_at	---	---	---	-3.21661	-16.7259	1.71e-13	4.4e-12
218856_at	TNFRSF21	tumor necrosis factor receptor superfamily, member 21	27242	-3.21231	-16.6501	1.86e-13	4.73e-12
53720_at	C19orf66	chromosome 19 open reading frame 66	55337	-3.2111	-19.0383	1.37e-14	4.88e-13
219983_at	HRASLS	HRAS-like suppressor	57110	-3.21058	-11.8268	1.15e-10	1.37e-09
1569287_at	---	---	---	-3.20751	-16.9024	1.39e-13	3.65e-12
1564413_at	FLJ36116	hypothetical locus LOC388666	388666	-3.20743	-11.5559	1.75e-10	2e-09
209723_at	SERPINB9	serpin peptidase inhibitor, clade B (ovalbumin), member 9	5272	-3.20377	-20.0629	4.89e-15	1.97e-13
206042_x_at	SNRPN /// SNURF	small nuclear ribonucleoprotein polypeptide N /// SNRPN upstream reading frame	6638 /// 8926	-3.20287	-4.19542	0.00041848	0.0011467
228217_s_at	PSMG4	proteasome (prosome, macropain) assembly chaperone 4	389362	-3.20235	-20.0386	5.01e-15	2.01e-13
217496_s_at	IDE	insulin-degrading enzyme	3416	-3.19628	-12.791	2.74e-11	3.84e-10
208782_at	FSTL1	follistatin-like 1	11167	-3.19568	-10.828	5.59e-10	5.62e-09
225725_at	---	---	---	-3.19371	-10.9536	4.56e-10	4.68e-09
205429_s_at	MPP6	membrane protein, palmitoylated 6 (MAGUK p55 subfamily member 6)	51678	-3.1931	-15.1477	1.14e-12	2.37e-11
206116_s_at	TPM1	tropomyosin 1 (alpha)	7168	-3.19175	-11.161	3.26e-10	3.48e-09
218886_at	PAK1IP1	PAK1 interacting protein 1	55003	-3.19011	-15.9026	4.52e-13	1.04e-11
214369_s_at	RASGRP2	RAS guanyl releasing protein 2 (calcium and DAG-regulated)	10235	-3.18239	-13.0943	1.77e-11	2.62e-10
1556469_s_at	---	---	---	-3.18128	-14.6897	2.05e-12	3.91e-11
204112_s_at	HNMT	histamine N-methyltransferase	3176	-3.17824	-13.3988	1.16e-11	1.79e-10
201865_x_at	NR3C1	nuclear receptor subfamily 3, group C, member 1 (glucocorticoid receptor)	2908	-3.17581	-10.294	1.36e-09	1.24e-08
213907_at	EEF1E1	Eukaryotic translation elongation factor 1 epsilon 1	9521	-3.1752	-11.599	1.63e-10	1.88e-09
242996_at	MTRF1	mitochondrial translational release factor 1	9617	-3.17507	-11.1055	3.57e-10	3.77e-09
41037_at	TEAD4	TEA domain family member 4	7004	-3.17262	-19.1473	1.23e-14	4.39e-13
222393_s_at	NAT13	N-acetyltransferase 13 (GCN5-related)	80218	-3.1719	-6.15181	4.48e-06	1.83e-05
210029_at	IDO1	indoleamine 2,3-dioxygenase 1	3620	-3.17162	-18.4693	2.48e-14	8.2e-13
223254_s_at	G2E3	G2/M-phase specific E3 ubiquitin ligase	55632	-3.16919	-7.02413	6.75e-07	3.25e-06
218193_s_at	GOLT1B	golgi transport 1 homolog B (S. cerevisiae)	51026	-3.16792	-7.40381	3.06e-07	1.58e-06
201319_at	MYL12A	myosin, light chain 12A, regulatory, non-sarcomeric	10627	-3.16718	-27.2267	1.1e-17	1.03e-15
207447_s_at	MGAT4C	mannosyl (alpha-1,3-)-glycoprotein beta-1,4-N-acetylglucosaminyltransferase, isozyme C (putative)	25834	-3.16229	-8.27566	5.33e-08	3.27e-07
37512_at	HSD17B6	hydroxysteroid (17-beta) dehydrogenase 6 homolog (mouse)	8630	-3.1579	-12.9437	2.2e-11	3.16e-10
210754_s_at	LYN	v-yes-1 Yamaguchi sarcoma viral related oncogene homolog	4067	-3.15597	-11.5379	1.8e-10	2.04e-09
1558292_s_at	PIGW	phosphatidylinositol glycan anchor biosynthesis, class W	284098	-3.15259	-11.6752	1.45e-10	1.69e-09
214662_at	WDR43	WD repeat domain 43	23160	-3.152	-8.12866	7.11e-08	4.22e-07
1555274_a_at	SELI	selenoprotein I	85465	-3.15148	-9.53304	5.12e-09	4e-08
219648_at	MREG	melanoregulin	55686	-3.14634	-16.3724	2.58e-13	6.31e-12
219572_at	CADPS2	Ca++-dependent secretion activator 2	93664	-3.14504	-12.137	7.18e-11	9.04e-10
221781_s_at	DNAJC10	DnaJ (Hsp40) homolog, subfamily C, member 10	54431	-3.14373	-5.56051	1.7e-05	6.17e-05
1553928_at	ELMOD2	ELMO/CED-12 domain containing 2	255520	-3.13817	-11.3236	2.52e-10	2.76e-09
201667_at	GJA1	gap junction protein, alpha 1, 43kDa	2697	-3.13676	-17.5278	6.89e-14	1.99e-12
208152_s_at	DDX21	DEAD (Asp-Glu-Ala-Asp) box polypeptide 21	9188	-3.13655	-16.2772	2.89e-13	6.98e-12
215947_s_at	FAM136A	family with sequence similarity 136, member A	84908	-3.13248	-11.2249	2.95e-10	3.17e-09
217938_s_at	KCMF1	potassium channel modulatory factor 1	56888	-3.13007	-17.1301	1.08e-13	2.92e-12
213698_at	ZMYM6	zinc finger, MYM-type 6	9204	-3.12614	-17.5263	6.9e-14	1.99e-12
212190_at	SERPINE2	serpin peptidase inhibitor, clade E (nexin, plasminogen activator inhibitor type 1), member 2	5270	-3.12478	-19.9621	5.4e-15	2.14e-13
208097_s_at	TMX1	thioredoxin-related transmembrane protein 1	81542	-3.12443	-9.76955	3.37e-09	2.76e-08
203951_at	CNN1	calponin 1, basic, smooth muscle	1264	-3.12375	-18.2703	3.07e-14	9.8e-13
213225_at	PPM1B	protein phosphatase 1B (formerly 2C), magnesium-dependent, beta isoform	5495	-3.12288	-13.4107	1.14e-11	1.77e-10
219540_at	ZNF267	zinc finger protein 267	10308	-3.12118	-10.1285	1.81e-09	1.58e-08
211686_s_at	MAK16	MAK16 homolog (S. cerevisiae)	84549	-3.12079	-12.0921	7.68e-11	9.58e-10
242387_at	C8orf42	chromosome 8 open reading frame 42	157695	-3.12055	-9.00379	1.34e-08	9.56e-08
203851_at	IGFBP6	insulin-like growth factor binding protein 6	3489	-3.11797	-17.0516	1.18e-13	3.16e-12
217542_at	MDM2	Mdm2 p53 binding protein homolog (mouse)	4193	-3.1162	-9.45465	5.89e-09	4.54e-08
218403_at	TRIAP1	TP53 regulated inhibitor of apoptosis 1	51499	-3.11401	-19.7818	6.46e-15	2.5e-13
217762_s_at	RAB31	RAB31, member RAS oncogene family	11031	-3.11319	-12.0656	7.99e-11	9.93e-10
211538_s_at	HSPA2	heat shock 70kDa protein 2	3306	-3.10903	-13.688	7.76e-12	1.26e-10
218802_at	CCDC109B	coiled-coil domain containing 109B	55013	-3.1041	-20.4801	3.26e-15	1.39e-13
217553_at	MGC87042	similar to Six transmembrane epithelial antigen of prostate	256227	-3.10361	-16.6789	1.8e-13	4.59e-12
225820_at	PHF17	PHD finger protein 17	79960	-3.10325	-20.9902	2e-15	9.19e-14
1562484_at	FLJ35848	hypothetical protein FLJ35848	284071	-3.09812	-19.7245	6.83e-15	2.63e-13
221974_at	IPW	imprinted in Prader-Willi syndrome (non-protein coding)	3653	-3.09759	-16.1038	3.55e-13	8.38e-12
218982_s_at	MRPS17 /// ZNF713	mitochondrial ribosomal protein S17 /// zinc finger protein 713	349075 /// 51373	-3.09243	-14.6389	2.19e-12	4.13e-11
244552_at	ZNF788	zinc finger family member 788	388507	-3.09122	-16.6676	1.83e-13	4.65e-12
226587_at	SNRPN	small nuclear ribonucleoprotein polypeptide N	6638	-3.09016	-10.0407	2.1e-09	1.81e-08
225866_at	BXDC1	brix domain containing 1	84154	-3.08963	-20.6057	2.89e-15	1.25e-13
220295_x_at	DEPDC1	DEP domain containing 1	55635	-3.08729	-5.18133	4.09e-05	0.00013737
202720_at	TES	testis derived transcript (3 LIM domains)	26136	-3.08077	-24.321	1.07e-16	7.44e-15
203186_s_at	S100A4	S100 calcium binding protein A4	6275	-3.08039	-13.8479	6.24e-12	1.04e-10
209288_s_at	CDC42EP3	CDC42 effector protein (Rho GTPase binding) 3	10602	-3.07994	-10.0621	2.02e-09	1.75e-08
203964_at	NMI	N-myc (and STAT) interactor	9111	-3.07619	-12.3001	5.62e-11	7.27e-10
230788_at	GCNT2	glucosaminyl (N-acetyl) transferase 2, I-branching enzyme (I blood group)	2651	-3.07525	-14.9997	1.38e-12	2.79e-11
222530_s_at	MKKS	McKusick-Kaufman syndrome	8195	-3.07448	-19.5883	7.83e-15	2.98e-13
209233_at	EMG1	EMG1 nucleolar protein homolog (S. cerevisiae)	10436	-3.07419	-13.6901	7.74e-12	1.26e-10
218949_s_at	QRSL1	glutaminyl-tRNA synthase (glutamine-hydrolyzing)-like 1	55278	-3.07325	-14.3292	3.28e-12	5.9e-11
207855_s_at	CLCC1	chloride channel CLIC-like 1	23155	-3.07307	-10.6697	7.26e-10	7.07e-09
239973_at	---	---	---	-3.07026	-17.4511	7.5e-14	2.13e-12
226261_at	ZNRF2	zinc and ring finger 2	223082	-3.06835	-10.8272	5.6e-10	5.62e-09
215471_s_at	MAP7	microtubule-associated protein 7	9053	-3.06824	-14.6285	2.22e-12	4.18e-11
213461_at	NUDT21	nudix (nucleoside diphosphate linked moiety X)-type motif 21	11051	-3.06765	-9.09451	1.13e-08	8.2e-08
228324_at	C9orf41	chromosome 9 open reading frame 41	138199	-3.06718	-10.3374	1.27e-09	1.16e-08
40148_at	APBB2	amyloid beta (A4) precursor protein-binding, family B, member 2	323	-3.06689	-8.86868	1.72e-08	1.19e-07
221987_s_at	TSR1	TSR1, 20S rRNA accumulation, homolog (S. cerevisiae)	55720	-3.0668	-14.7712	1.85e-12	3.58e-11
228990_at	SNHG12	small nucleolar RNA host gene 12 (non-protein coding)	85028	-3.06666	-10.6318	7.73e-10	7.47e-09
221803_s_at	NRBF2	nuclear receptor binding factor 2	29982	-3.06553	-17.6702	5.89e-14	1.74e-12
209835_x_at	CD44	CD44 molecule (Indian blood group)	960	-3.06171	-11.1496	3.32e-10	3.54e-09
222847_s_at	EGLN3	egl nine homolog 3 (C. elegans)	112399	-3.06104	-13.1732	1.59e-11	2.38e-10
220053_at	GDF3	growth differentiation factor 3	9573	-3.05739	-16.6077	1.96e-13	4.93e-12
224400_s_at	CHST9	carbohydrate (N-acetylgalactosamine 4-0) sulfotransferase 9	83539	-3.05383	-10.0416	2.1e-09	1.81e-08
209891_at	SPC25	SPC25, NDC80 kinetochore complex component, homolog (S. cerevisiae)	57405	-3.05324	-19.6967	7.03e-15	2.7e-13
223677_at	ATG10	ATG10 autophagy related 10 homolog (S. cerevisiae)	83734	-3.04543	-11.7837	1.23e-10	1.46e-09
200791_s_at	IQGAP1	IQ motif containing GTPase activating protein 1	8826	-3.04374	-12.278	5.81e-11	7.49e-10
217834_s_at	SYNCRIP	synaptotagmin binding, cytoplasmic RNA interacting protein	10492	-3.04363	-18.2881	3.01e-14	9.64e-13
201906_s_at	CTDSPL	CTD (carboxy-terminal domain, RNA polymerase II, polypeptide A) small phosphatase-like	10217	-3.04327	-12.4607	4.43e-11	5.91e-10
213379_at	COQ2	coenzyme Q2 homolog, prenyltransferase (yeast)	27235	-3.04171	-15.6408	6.21e-13	1.39e-11
222958_s_at	DEPDC1	DEP domain containing 1	55635	-3.0385	-8.63815	2.66e-08	1.76e-07
200660_at	S100A11	S100 calcium binding protein A11	6282	-3.03766	-10.0105	2.21e-09	1.9e-08
200782_at	ANXA5	annexin A5	308	-3.03762	-20.7062	2.62e-15	1.16e-13
214829_at	AASS	aminoadipate-semialdehyde synthase	10157	-3.03647	-8.70243	2.35e-08	1.58e-07
1554242_a_at	COCH	coagulation factor C homolog, cochlin (Limulus polyphemus)	1690	-3.03463	-9.55039	4.96e-09	3.9e-08
201014_s_at	PAICS	phosphoribosylaminoimidazole carboxylase, phosphoribosylaminoimidazole succinocarboxamide synthetase	10606	-3.03344	-17.9371	4.4e-14	1.35e-12
229500_at	SLC30A9	solute carrier family 30 (zinc transporter), member 9	10463	-3.03218	-7.10088	5.74e-07	2.81e-06
225171_at	ARHGAP18	Rho GTPase activating protein 18	93663	-3.03159	-8.05432	8.23e-08	4.81e-07
227004_at	---	---	---	-3.02943	-8.14784	6.84e-08	4.08e-07
225847_at	AADACL1	arylacetamide deacetylase-like 1	57552	-3.02664	-14.073	4.61e-12	7.95e-11
222477_s_at	TM7SF3	transmembrane 7 superfamily member 3	51768	-3.02522	-19.5396	8.23e-15	3.1e-13
240349_at	PRKAA2	protein kinase, AMP-activated, alpha 2 catalytic subunit	5563	-3.02463	-14.6857	2.06e-12	3.92e-11
202085_at	TJP2	tight junction protein 2 (zona occludens 2)	9414	-3.01978	-13.0465	1.9e-11	2.78e-10
218313_s_at	GALNT7	UDP-N-acetyl-alpha-D-galactosamine:polypeptide N-acetylgalactosaminyltransferase 7 (GalNAc-T7)	51809	-3.01812	-12.0178	8.59e-11	1.06e-09
206348_s_at	PDK3	pyruvate dehydrogenase kinase, isozyme 3	5165	-3.01774	-12.5087	4.13e-11	5.55e-10
223996_s_at	MRPL30	mitochondrial ribosomal protein L30	51263	-3.01654	-6.407	2.55e-06	1.09e-05
216202_s_at	SPTLC2	serine palmitoyltransferase, long chain base subunit 2	9517	-3.01641	-12.6138	3.54e-11	4.84e-10
1562226_at	VWDE	von Willebrand factor D and EGF domains	221806	-3.0154	-15.6259	6.32e-13	1.41e-11
227862_at	TRNP1	TMF1-regulated nuclear protein 1	388610	-3.01463	-18.4586	2.51e-14	8.26e-13
214116_at	BTD	biotinidase	686	-3.01183	-18.8067	1.74e-14	6.01e-13
207836_s_at	RBPMS	RNA binding protein with multiple splicing	11030	-3.01149	-12.9398	2.21e-11	3.18e-10
209642_at	BUB1	budding uninhibited by benzimidazoles 1 homolog (yeast)	699	-3.0113	-9.38941	6.62e-09	5.04e-08
212481_s_at	TPM4	tropomyosin 4	7171	-3.0112	-16.151	3.35e-13	7.97e-12
200798_x_at	MCL1	myeloid cell leukemia sequence 1 (BCL2-related)	4170	-3.01036	-12.8159	2.64e-11	3.72e-10
220474_at	SLC25A21	solute carrier family 25 (mitochondrial oxodicarboxylate carrier), member 21	89874	-3.00961	-19.3574	9.89e-15	3.62e-13
218728_s_at	CNIH4	cornichon homolog 4 (Drosophila)	29097	-3.00704	-18.2943	2.99e-14	9.61e-13
205628_at	PRIM2	primase, DNA, polypeptide 2 (58kDa)	5558	-3.0066	-9.23233	8.8e-09	6.52e-08
225164_s_at	EIF2AK4	eukaryotic translation initiation factor 2 alpha kinase 4	440275	-3.00387	-11.2824	2.69e-10	2.92e-09
227139_s_at	HPS3	Hermansky-Pudlak syndrome 3	84343	-3.00188	-12.3293	5.38e-11	6.99e-10
224200_s_at	RAD18	RAD18 homolog (S. cerevisiae)	56852	-2.99956	-7.34477	3.45e-07	1.76e-06
212993_at	NACC2	NACC family member 2, BEN and BTB (POZ) domain containing	138151	-2.99938	-9.88681	2.74e-09	2.3e-08
227686_at	OXNAD1	oxidoreductase NAD-binding domain containing 1	92106	-2.99648	-19.2113	1.15e-14	4.13e-13
212543_at	AIM1	absent in melanoma 1	202	-2.99611	-10.2852	1.38e-09	1.26e-08
1564838_a_at	LOC151760	hypothetical LOC151760	151760	-2.99276	-18.7626	1.82e-14	6.26e-13
225275_at	EDIL3	EGF-like repeats and discoidin I-like domains 3	10085	-2.99241	-10.9531	4.56e-10	4.68e-09
214020_x_at	ITGB5	Integrin, beta 5	3693	-2.99041	-18.0777	3.77e-14	1.18e-12
1559697_a_at	---	---	---	-2.98992	-21.5021	1.24e-15	6.13e-14
235615_at	PGGT1B	protein geranylgeranyltransferase type I, beta subunit	5229	-2.9894	-7.50589	2.48e-07	1.3e-06
224413_s_at	TM2D2	TM2 domain containing 2	83877	-2.98935	-18.7443	1.86e-14	6.37e-13
232094_at	C15orf29	chromosome 15 open reading frame 29	79768	-2.98839	-10.2062	1.58e-09	1.41e-08
229181_s_at	HAUS2	HAUS augmin-like complex, subunit 2	55142	-2.98684	-13.9445	5.48e-12	9.22e-11
203409_at	DDB2	damage-specific DNA binding protein 2, 48kDa	1643	-2.98573	-16.8566	1.47e-13	3.83e-12
221641_s_at	ACOT9	acyl-CoA thioesterase 9	23597	-2.98531	-17.6535	6e-14	1.76e-12
225081_s_at	CDCA7L	cell division cycle associated 7-like	55536	-2.97703	-11.2569	2.8e-10	3.03e-09
234405_s_at	PHAX	phosphorylated adaptor for RNA export	51808	-2.97453	-14.2224	3.78e-12	6.69e-11
209070_s_at	RGS5	regulator of G-protein signaling 5	8490	-2.97371	-10.5978	8.18e-10	7.85e-09
1552946_at	ZNF114	zinc finger protein 114	163071	-2.97188	-17.385	8.08e-14	2.26e-12
236471_at	NFE2L3	nuclear factor (erythroid-derived 2)-like 3	9603	-2.97181	-12.8352	2.57e-11	3.63e-10
225849_s_at	SFT2D1	SFT2 domain containing 1	113402	-2.96893	-20.679	2.69e-15	1.18e-13
228543_at	CSRP2BP	CSRP2 binding protein	57325	-2.95957	-11.4098	2.2e-10	2.44e-09
201798_s_at	MYOF	myoferlin	26509	-2.95807	-11.9329	9.77e-11	1.19e-09
222608_s_at	ANLN	anillin, actin binding protein	54443	-2.95802	-9.22032	9e-09	6.65e-08
234987_at	---	---	---	-2.95443	-12.1434	7.11e-11	8.96e-10
241829_at	FAM124A	family with sequence similarity 124A	220108	-2.95391	-13.0213	1.97e-11	2.87e-10
205047_s_at	ASNS	asparagine synthetase	440	-2.95352	-17.4664	7.38e-14	2.1e-12
228057_at	DDIT4L	DNA-damage-inducible transcript 4-like	115265	-2.95209	-14.9592	1.45e-12	2.91e-11
201971_s_at	ATP6V1A	ATPase, H+ transporting, lysosomal 70kDa, V1 subunit A	523	-2.94822	-9.0577	1.21e-08	8.71e-08
242905_at	PNO1	partner of NOB1 homolog (S. cerevisiae)	56902	-2.94604	-15.4971	7.41e-13	1.62e-11
235610_at	ALKBH8	alkB, alkylation repair homolog 8 (E. coli)	91801	-2.94577	-6.61892	1.61e-06	7.13e-06
228468_at	MASTL	microtubule associated serine/threonine kinase-like	84930	-2.9451	-8.93512	1.52e-08	1.07e-07
242463_x_at	ZNF600	zinc finger protein 600	162966	-2.94426	-13.0679	1.84e-11	2.71e-10
217893_s_at	AKIRIN1	akirin 1	79647	-2.94299	-8.64273	2.63e-08	1.75e-07
224511_s_at	TXNDC17	thioredoxin domain containing 17	84817	-2.94282	-12.2982	5.64e-11	7.29e-10
213256_at	2011-03-03	membrane-associated ring finger (C3HC4) 3	115123	-2.94041	-14.4585	2.77e-12	5.07e-11
223221_at	SCO1	SCO cytochrome oxidase deficient homolog 1 (yeast)	6341	-2.94007	-15.0996	1.22e-12	2.5e-11
203313_s_at	TGIF1	TGFB-induced factor homeobox 1	7050	-2.93849	-17.486	7.22e-14	2.06e-12
212063_at	CD44	CD44 molecule (Indian blood group)	960	-2.9373	-10.2663	1.43e-09	1.29e-08
1564837_at	LOC151760	hypothetical LOC151760	151760	-2.93585	-17.3928	8.01e-14	2.25e-12
235740_at	---	---	---	-2.93489	-15.1078	1.2e-12	2.48e-11
224634_at	GPATCH4	G patch domain containing 4	54865	-2.93462	-15.1768	1.1e-12	2.3e-11
204407_at	TTF2	transcription termination factor, RNA polymerase II	8458	-2.93453	-12.3753	5.03e-11	6.58e-10
209860_s_at	ANXA7	annexin A7	310	-2.93421	-14.1912	3.94e-12	6.94e-11
235244_at	CCDC58	coiled-coil domain containing 58	131076	-2.93407	-14.1335	4.25e-12	7.42e-11
223984_s_at	NUPL1	nucleoporin like 1	9818	-2.93129	-6.53907	1.91e-06	8.35e-06
218479_s_at	XPO4	exportin 4	64328	-2.93102	-15.9393	4.32e-13	9.97e-12
222606_at	ZWILCH	Zwilch, kinetochore associated, homolog (Drosophila)	55055	-2.9274	-12.8165	2.64e-11	3.71e-10
222583_s_at	NUP50	nucleoporin 50kDa	10762	-2.92634	-10.2617	1.44e-09	1.3e-08
203880_at	COX17	COX17 cytochrome c oxidase assembly homolog (S. cerevisiae)	10063	-2.92381	-14.6484	2.16e-12	4.09e-11
232151_at	MACC1	metastasis associated in colon cancer 1	346389	-2.9235	-17.7989	5.11e-14	1.53e-12
229693_at	TMEM220	transmembrane protein 220	388335	-2.92326	-15.2254	1.04e-12	2.18e-11
243221_at	FAM20A	family with sequence similarity 20, member A	54757	-2.92267	-16.0839	3.63e-13	8.55e-12
201037_at	PFKP	phosphofructokinase, platelet	5214	-2.92211	-9.16463	9.96e-09	7.29e-08
217738_at	NAMPT	nicotinamide phosphoribosyltransferase	10135	-2.92133	-7.2494	4.21e-07	2.11e-06
202284_s_at	CDKN1A	cyclin-dependent kinase inhibitor 1A (p21, Cip1)	1026	-2.9185	-15.3827	8.53e-13	1.84e-11
223989_s_at	REXO2	REX2, RNA exonuclease 2 homolog (S. cerevisiae)	25996	-2.91753	-6.2597	3.53e-06	1.47e-05
1554256_a_at	PCNXL2	pecanex-like 2 (Drosophila)	80003	-2.91628	-20.0946	4.74e-15	1.92e-13
218046_s_at	MRPS16	mitochondrial ribosomal protein S16	51021	-2.91593	-10.5679	8.59e-10	8.23e-09
223258_s_at	G2E3	G2/M-phase specific E3 ubiquitin ligase	55632	-2.91548	-8.40022	4.19e-08	2.64e-07
218732_at	PTRH2	peptidyl-tRNA hydrolase 2	51651	-2.91423	-19.9548	5.44e-15	2.15e-13
228315_at	---	---	---	-2.91401	-6.29993	3.23e-06	1.35e-05
218461_at	GPN3	GPN-loop GTPase 3	51184	-2.91401	-20.5974	2.91e-15	1.26e-13
244774_at	PHACTR2	phosphatase and actin regulator 2	9749	-2.91306	-6.56121	1.82e-06	7.99e-06
201599_at	OAT	ornithine aminotransferase (gyrate atrophy)	4942	-2.91176	-14.6115	2.27e-12	4.26e-11
244669_at	SNHG5 /// SNORD50A /// SNORD50B	small nucleolar RNA host gene 5 (non-protein coding) /// small nucleolar RNA, C/D box 50A /// small nucleolar RNA, C/D box 50B	26799 /// 387066 /// 692088	-2.91154	-11.2124	3.01e-10	3.23e-09
240865_at	---	---	---	-2.9112	-9.25495	8.45e-09	6.28e-08
208636_at	ACTN1	actinin, alpha 1	87	-2.91093	-17.4911	7.18e-14	2.05e-12
202252_at	RAB13	RAB13, member RAS oncogene family	5872	-2.90999	-17.6395	6.09e-14	1.79e-12
235025_at	WDR89	WD repeat domain 89	112840	-2.909	-8.43697	3.9e-08	2.48e-07
218180_s_at	EPS8L2	EPS8-like 2	64787	-2.90819	-15.8211	4.98e-13	1.13e-11
1553991_s_at	FLJ20674	hypothetical protein FLJ20674	54621	-2.90752	-13.2453	1.43e-11	2.17e-10
205321_at	EIF2S3	eukaryotic translation initiation factor 2, subunit 3 gamma, 52kDa	1968	-2.9067	-15.0424	1.31e-12	2.67e-11
224341_x_at	TLR4	toll-like receptor 4	7099	-2.90505	-21.2978	1.5e-15	7.21e-14
235048_at	FAM169A	family with sequence similarity 169, member A	26049	-2.90347	-13.1174	1.72e-11	2.55e-10
1552486_s_at	LACTB	lactamase, beta	114294	-2.90133	-11.1519	3.31e-10	3.53e-09
215708_s_at	PRIM2	primase, DNA, polypeptide 2 (58kDa)	5558	-2.89856	-11.8336	1.14e-10	1.36e-09
205393_s_at	CHEK1	CHK1 checkpoint homolog (S. pombe)	1111	-2.89658	-11.1905	3.11e-10	3.33e-09
203359_s_at	MYCBP	c-myc binding protein	26292	-2.89612	-13.6966	7.67e-12	1.25e-10
223151_at	DCUN1D5	DCN1, defective in cullin neddylation 1, domain containing 5 (S. cerevisiae)	84259	-2.8961	-16.6456	1.87e-13	4.75e-12
217299_s_at	NBN	nibrin	4683	-2.89473	-7.8073	1.35e-07	7.51e-07
204891_s_at	LCK	lymphocyte-specific protein tyrosine kinase	3932	-2.89261	-13.922	5.65e-12	9.47e-11
204092_s_at	AURKA	aurora kinase A	6790	-2.8909	-10.87	5.22e-10	5.28e-09
213836_s_at	WIPI1	WD repeat domain, phosphoinositide interacting 1	55062	-2.88947	-9.49868	5.44e-09	4.23e-08
228378_at	C12orf29	chromosome 12 open reading frame 29	91298	-2.88812	-14.7666	1.86e-12	3.6e-11
1568609_s_at	FAM91A2 /// FLJ39739 /// LOC100286793 /// LOC728855 /// LOC728875	family with sequence similarity 91, member A2 /// hypothetical FLJ39739 /// hypothetical LOC100286793 /// hypothetical LOC728855 /// hypothetical LOC728875	100286793 /// 388685 /// 57234 /// 728855 /// 728875	-2.88783	-4.34905	0.00029056	0.00082131
205483_s_at	ISG15	ISG15 ubiquitin-like modifier	9636	-2.88392	-12.3187	5.47e-11	7.1e-10
219037_at	RRP15	ribosomal RNA processing 15 homolog (S. cerevisiae)	51018	-2.88285	-17.7365	5.47e-14	1.63e-12
241612_at	FOXD3	forkhead box D3	27022	-2.88185	-13.1032	1.75e-11	2.6e-10
220818_s_at	TRPC4	transient receptor potential cation channel, subfamily C, member 4	7223	-2.88005	-14.0956	4.47e-12	7.75e-11
202533_s_at	DHFR	dihydrofolate reductase	1719	-2.87962	-9.62726	4.33e-09	3.46e-08
206182_at	ZNF134	zinc finger protein 134	7693	-2.87945	-12.3515	5.21e-11	6.78e-10
226185_at	CDS1	CDP-diacylglycerol synthase (phosphatidate cytidylyltransferase) 1	1040	-2.87922	-12.3132	5.51e-11	7.15e-10
210876_at	ANXA2P1	annexin A2 pseudogene 1	303	-2.87878	-15.0171	1.35e-12	2.74e-11
219258_at	TIPIN	TIMELESS interacting protein	54962	-2.87791	-15.456	7.79e-13	1.69e-11
223177_at	NT5DC1	5'-nucleotidase domain containing 1	221294	-2.876	-14.8586	1.65e-12	3.23e-11
224484_s_at	BRMS1L	breast cancer metastasis-suppressor 1-like	84312	-2.87597	-7.07694	6.04e-07	2.94e-06
238435_at	CA5BP	carbonic anhydrase VB pseudogene	340591	-2.87592	-12.2537	6.02e-11	7.74e-10
208165_s_at	PRSS16	protease, serine, 16 (thymus)	10279	-2.87547	-13.9495	5.44e-12	9.17e-11
203041_s_at	LAMP2	lysosomal-associated membrane protein 2	3920	-2.87296	-16.6134	1.95e-13	4.9e-12
226349_at	C12orf45	chromosome 12 open reading frame 45	121053	-2.87253	-12.9277	2.25e-11	3.23e-10
202923_s_at	GCLC	glutamate-cysteine ligase, catalytic subunit	2729	-2.86828	-8.67801	2.46e-08	1.64e-07
203298_s_at	JARID2	jumonji, AT rich interactive domain 2	3720	-2.86789	-16.7799	1.6e-13	4.16e-12
218640_s_at	PLEKHF2	pleckstrin homology domain containing, family F (with FYVE domain) member 2	79666	-2.86602	-5.73339	1.15e-05	4.3e-05
226105_at	---	---	---	-2.86579	-11.2744	2.72e-10	2.96e-09
221923_s_at	NPM1	nucleophosmin (nucleolar phosphoprotein B23, numatrin)	4869	-2.86553	-20.6949	2.65e-15	1.17e-13
235022_at	C18orf19	chromosome 18 open reading frame 19	125228	-2.86457	-8.7727	2.06e-08	1.41e-07
201952_at	ALCAM	activated leukocyte cell adhesion molecule	214	-2.86046	-10.7744	6.11e-10	6.06e-09
231050_at	HRASLS5	HRAS-like suppressor family, member 5	117245	-2.86006	-15.8426	4.85e-13	1.11e-11
220007_at	METTL8	methyltransferase like 8	79828	-2.8593	-14.8955	1.58e-12	3.12e-11
215028_at	SEMA6A	sema domain, transmembrane domain (TM), and cytoplasmic domain, (semaphorin) 6A	57556	-2.85909	-8.39642	4.22e-08	2.65e-07
226103_at	NEXN	nexilin (F actin binding protein)	91624	-2.85731	-14.701	2.02e-12	3.86e-11
217739_s_at	NAMPT	nicotinamide phosphoribosyltransferase	10135	-2.85656	-9.27661	8.12e-09	6.06e-08
223349_s_at	BOK	BCL2-related ovarian killer	666	-2.85628	-14.8726	1.62e-12	3.19e-11
204502_at	SAMHD1	SAM domain and HD domain 1	25939	-2.85499	-16.0789	3.65e-13	8.58e-12
223993_s_at	CNIH4	cornichon homolog 4 (Drosophila)	29097	-2.8524	-13.9019	5.8e-12	9.68e-11
201615_x_at	CALD1	caldesmon 1	800	-2.85234	-2.93934	0.00791562	0.0165852
239202_at	---	---	---	-2.85166	-11.5764	1.69e-10	1.94e-09
231094_s_at	MTHFD1L	methylenetetrahydrofolate dehydrogenase (NADP+ dependent) 1-like	25902	-2.85098	-14.8943	1.58e-12	3.12e-11
209678_s_at	PRKCI	protein kinase C, iota	5584	-2.85085	-8.19003	6.3e-08	3.8e-07
215034_s_at	TM4SF1	transmembrane 4 L six family member 1	4071	-2.85078	-12.4338	4.61e-11	6.1e-10
1555971_s_at	FBXO28	F-box protein 28	23219	-2.85005	-13.3818	1.18e-11	1.83e-10
217999_s_at	PHLDA1	pleckstrin homology-like domain, family A, member 1	22822	-2.84768	-22.6296	4.49e-16	2.58e-14
205565_s_at	FXN	frataxin	2395	-2.84751	-14.6861	2.06e-12	3.92e-11
228415_at	AP1S2	adaptor-related protein complex 1, sigma 2 subunit	8905	-2.84585	-13.9044	5.78e-12	9.65e-11
222239_s_at	INTS6	integrator complex subunit 6	26512	-2.8445	-9.29952	7.79e-09	5.84e-08
1570266_x_at	---	---	---	-2.84415	-13.6482	8.2e-12	1.32e-10
208789_at	PTRF	polymerase I and transcript release factor	284119	-2.84321	-13.3293	1.27e-11	1.95e-10
201197_at	AMD1	adenosylmethionine decarboxylase 1	262	-2.84162	-8.64095	2.64e-08	1.75e-07
211721_s_at	ZNF551	zinc finger protein 551	90233	-2.83924	-11.2091	3.02e-10	3.24e-09
203320_at	SH2B3	SH2B adaptor protein 3	10019	-2.83676	-15.1126	1.2e-12	2.47e-11
235476_at	TRIM59	tripartite motif-containing 59	286827	-2.83573	-6.84917	9.79e-07	4.55e-06
223714_at	ZNF256	zinc finger protein 256	10172	-2.83193	-13.563	9.21e-12	1.46e-10
226661_at	CDCA2	cell division cycle associated 2	157313	-2.83078	-11.6414	1.53e-10	1.77e-09
223490_s_at	EXOSC3	exosome component 3	51010	-2.83052	-10.6711	7.24e-10	7.06e-09
1255_g_at	GUCA1A	guanylate cyclase activator 1A (retina)	2978	-2.83036	-14.8365	1.7e-12	3.31e-11
218379_at	RBM7	RNA binding motif protein 7	10179	-2.82889	-17.1531	1.05e-13	2.86e-12
219267_at	GLTP	glycolipid transfer protein	51228	-2.82858	-10.0328	2.13e-09	1.84e-08
221963_x_at	---	---	---	-2.82661	-16.6929	1.77e-13	4.54e-12
216609_at	TXN	Thioredoxin	7295	-2.82648	-7.95847	9.95e-08	5.72e-07
213571_s_at	EIF4E2	eukaryotic translation initiation factor 4E family member 2	9470	-2.82555	-20.5208	3.13e-15	1.34e-13
209520_s_at	NCBP1	nuclear cap binding protein subunit 1, 80kDa	4686	-2.82487	-5.97331	6.68e-06	2.62e-05
202722_s_at	GFPT1	glutamine-fructose-6-phosphate transaminase 1	2673	-2.82386	-8.78923	2e-08	1.37e-07
223427_s_at	EPB41L4B	erythrocyte membrane protein band 4.1 like 4B	54566	-2.823	-13.9174	5.68e-12	9.51e-11
1555443_at	C10orf96	chromosome 10 open reading frame 96	374355	-2.82268	-9.93003	2.54e-09	2.15e-08
205394_at	CHEK1	CHK1 checkpoint homolog (S. pombe)	1111	-2.82035	-10.1986	1.6e-09	1.43e-08
202955_s_at	ARFGEF1	ADP-ribosylation factor guanine nucleotide-exchange factor 1(brefeldin A-inhibited)	10565	-2.82011	-12.5672	3.79e-11	5.15e-10
1559399_s_at	ZCCHC10	zinc finger, CCHC domain containing 10	54819	-2.81999	-10.842	5.47e-10	5.51e-09
204128_s_at	RFC3	replication factor C (activator 1) 3, 38kDa	5983	-2.81796	-7.43439	2.87e-07	1.49e-06
208815_x_at	HSPA4	heat shock 70kDa protein 4	3308	-2.81683	-12.1682	6.85e-11	8.66e-10
233208_x_at	CPSF2	cleavage and polyadenylation specific factor 2, 100kDa	53981	-2.81539	-8.56791	3.04e-08	1.98e-07
224377_s_at	RAB18	RAB18, member RAS oncogene family	22931	-2.81382	-15.2669	9.86e-13	2.08e-11
210587_at	INHBE	inhibin, beta E	83729	-2.81366	-12.534	3.98e-11	5.37e-10
207332_s_at	TFRC	transferrin receptor (p90, CD71)	7037	-2.81338	-10.1988	1.6e-09	1.43e-08
200690_at	HSPA9	heat shock 70kDa protein 9 (mortalin)	3313	-2.81326	-9.38686	6.65e-09	5.06e-08
214264_s_at	C14orf143	chromosome 14 open reading frame 143	90141	-2.81272	-16.9589	1.31e-13	3.46e-12
225734_at	FBXO22	F-box protein 22	26263	-2.81237	-7.14797	5.2e-07	2.56e-06
235955_at	MARVELD2	MARVEL domain containing 2	153562	-2.81223	-13.5729	9.09e-12	1.45e-10
220129_at	SOHLH2	spermatogenesis and oogenesis specific basic helix-loop-helix 2	54937	-2.81113	-9.4976	5.45e-09	4.24e-08
219474_at	C3orf52	chromosome 3 open reading frame 52	79669	-2.81058	-12.8661	2.46e-11	3.49e-10
220840_s_at	C1orf112	chromosome 1 open reading frame 112	55732	-2.80919	-7.71401	1.62e-07	8.9e-07
227916_x_at	EXOSC3	exosome component 3	51010	-2.80774	-19.9812	5.3e-15	2.1e-13
229097_at	DIAPH3	diaphanous homolog 3 (Drosophila)	81624	-2.8006	-15.1433	1.15e-12	2.38e-11
217808_s_at	MAPKAP1	mitogen-activated protein kinase associated protein 1	79109	-2.79957	-14.1835	3.98e-12	6.99e-11
238912_x_at	C9orf85	chromosome 9 open reading frame 85	138241	-2.7994	-14.9205	1.53e-12	3.04e-11
218512_at	WDR12	WD repeat domain 12	55759	-2.79863	-19.7864	6.43e-15	2.5e-13
1560537_at	LOC100129662	hypothetical protein LOC100129662	100129662	-2.7976	-17.5877	6.45e-14	1.88e-12
203706_s_at	FZD7	frizzled homolog 7 (Drosophila)	8324	-2.7968	-12.0906	7.7e-11	9.59e-10
219662_at	C2orf49	chromosome 2 open reading frame 49	79074	-2.7967	-14.2421	3.68e-12	6.54e-11
206528_at	TRPC6	transient receptor potential cation channel, subfamily C, member 6	7225	-2.79411	-19.5775	7.92e-15	3e-13
218499_at	RP6-213H19.1	serine/threonine protein kinase MST4	51765	-2.79151	-9.25516	8.44e-09	6.28e-08
201980_s_at	RSU1	Ras suppressor protein 1	6251	-2.78877	-23.2292	2.67e-16	1.66e-14
238879_at	---	---	---	-2.78612	-7.71243	1.63e-07	8.92e-07
211267_at	HESX1	HESX homeobox 1	8820	-2.78501	-18.3337	2.87e-14	9.23e-13
200916_at	TAGLN2	transgelin 2	8407	-2.78347	-12.4092	4.78e-11	6.3e-10
218096_at	AGPAT5	1-acylglycerol-3-phosphate O-acyltransferase 5 (lysophosphatidic acid acyltransferase, epsilon)	55326	-2.78241	-9.64871	4.17e-09	3.34e-08
220122_at	MCTP1	multiple C2 domains, transmembrane 1	79772	-2.78163	-12.9032	2.33e-11	3.33e-10
227038_at	SGMS2	sphingomyelin synthase 2	166929	-2.78129	-7.63431	1.91e-07	1.03e-06
213373_s_at	CASP8	caspase 8, apoptosis-related cysteine peptidase	841	-2.77978	-10.4989	9.64e-10	9.11e-09
226912_at	ZDHHC23	zinc finger, DHHC-type containing 23	254887	-2.77789	-9.54625	5e-09	3.92e-08
210115_at	RPL39L	ribosomal protein L39-like	116832	-2.7748	-10.4383	1.07e-09	9.97e-09
203962_s_at	NEBL	nebulette	10529	-2.77409	-7.55946	2.22e-07	1.18e-06
215711_s_at	WEE1	WEE1 homolog (S. pombe)	7465	-2.77331	-13.0072	2.01e-11	2.92e-10
238662_at	ATPBD4	ATP binding domain 4	89978	-2.77154	-15.0253	1.34e-12	2.72e-11
225972_at	TMEM64	transmembrane protein 64	169200	-2.77105	-12.1194	7.37e-11	9.24e-10
226282_at	---	---	---	-2.7709	-14.5456	2.47e-12	4.58e-11
1555910_at	PTCD2	pentatricopeptide repeat domain 2	79810	-2.77077	-12.5105	4.12e-11	5.54e-10
219494_at	RAD54B	RAD54 homolog B (S. cerevisiae)	25788	-2.77002	-7.89591	1.13e-07	6.41e-07
224220_x_at	TRPC4	transient receptor potential cation channel, subfamily C, member 4	7223	-2.76999	-11.3189	2.54e-10	2.78e-09
204058_at	ME1	malic enzyme 1, NADP(+)-dependent, cytosolic	4199	-2.76975	-9.17287	9.81e-09	7.2e-08
222033_s_at	---	---	---	-2.7693	-15.5647	6.81e-13	1.51e-11
218007_s_at	RPS27L	ribosomal protein S27-like	51065	-2.76894	-13.8389	6.32e-12	1.05e-10
212014_x_at	CD44	CD44 molecule (Indian blood group)	960	-2.76806	-20.665	2.73e-15	1.19e-13
213689_x_at	FAM69A	family with sequence similarity 69, member A	388650	-2.76639	-8.42678	3.98e-08	2.52e-07
204083_s_at	TPM2	tropomyosin 2 (beta)	7169	-2.7659	-9.38348	6.69e-09	5.09e-08
228505_s_at	TMEM170A	transmembrane protein 170A	124491	-2.76414	-11.6096	1.61e-10	1.85e-09
227897_at	---	---	---	-2.76173	-16.2118	3.12e-13	7.48e-12
201263_at	TARS	threonyl-tRNA synthetase	6897	-2.76167	-9.54641	5e-09	3.92e-08
227947_at	PHACTR2	phosphatase and actin regulator 2	9749	-2.75867	-11.8215	1.16e-10	1.38e-09
203013_at	ECD	ecdysoneless homolog (Drosophila)	11319	-2.75818	-18.3776	2.74e-14	8.87e-13
203474_at	IQGAP2	IQ motif containing GTPase activating protein 2	10788	-2.75738	-10.0728	1.99e-09	1.72e-08
202422_s_at	ACSL4	acyl-CoA synthetase long-chain family member 4	2182	-2.75599	-11.3064	2.59e-10	2.82e-09
235509_at	C8orf38	chromosome 8 open reading frame 38	137682	-2.75566	-12.6302	3.46e-11	4.74e-10
231042_s_at	---	---	---	-2.75362	-3.41853	0.00262467	0.00612055
207345_at	FST	follistatin	10468	-2.75361	-8.03518	8.54e-08	4.98e-07
201366_at	ANXA7	annexin A7	310	-2.75307	-10.1212	1.83e-09	1.6e-08
203433_at	MTHFS	5,10-methenyltetrahydrofolate synthetase (5-formyltetrahydrofolate cyclo-ligase)	10588	-2.75293	-10.9033	4.95e-10	5.03e-09
216733_s_at	GATM	glycine amidinotransferase (L-arginine:glycine amidinotransferase)	2628	-2.75085	-8.07942	7.83e-08	4.6e-07
239143_x_at	RNF138	ring finger protein 138	51444	-2.75076	-5.012	6.08e-05	0.000197172
1552947_x_at	ZNF114	zinc finger protein 114	163071	-2.7505	-19.0255	1.39e-14	4.93e-13
203921_at	CHST2	carbohydrate (N-acetylglucosamine-6-O) sulfotransferase 2	9435	-2.75039	-10.5005	9.62e-10	9.09e-09
219000_s_at	DSCC1	defective in sister chromatid cohesion 1 homolog (S. cerevisiae)	79075	-2.74709	-16.0681	3.7e-13	8.68e-12
226881_at	GRPEL2	GrpE-like 2, mitochondrial (E. coli)	134266	-2.747	-11.1925	3.1e-10	3.32e-09
202816_s_at	SS18	synovial sarcoma translocation, chromosome 18	6760	-2.74542	-7.32258	3.62e-07	1.84e-06
244563_at	QSER1	glutamine and serine rich 1	79832	-2.74533	-4.75236	0.000111843	0.000343585
203745_at	HCCS	holocytochrome c synthase (cytochrome c heme-lyase)	3052	-2.74461	-8.08986	7.67e-08	4.52e-07
238951_at	---	---	---	-2.74387	-9.02863	1.28e-08	9.16e-08
1554414_a_at	OSGIN2	oxidative stress induced growth inhibitor family member 2	734	-2.74336	-6.925	8.33e-07	3.93e-06
219006_at	NDUFAF4	NADH dehydrogenase (ubiquinone) 1 alpha subcomplex, assembly factor 4	29078	-2.74178	-15.8691	4.7e-13	1.08e-11
206702_at	TEK	TEK tyrosine kinase, endothelial	7010	-2.7408	-13.6455	8.23e-12	1.32e-10
212333_at	FAM98A	family with sequence similarity 98, member A	25940	-2.73967	-11.0407	3.96e-10	4.14e-09
220536_at	C14orf115	chromosome 14 open reading frame 115	55237	-2.73774	-12.8306	2.59e-11	3.65e-10
223452_s_at	ATL3	atlastin GTPase 3	25923	-2.73741	-10.6871	7.05e-10	6.9e-09
212720_at	PAPOLA	poly(A) polymerase alpha	10914	-2.73542	-3.3169	0.00332628	0.00758477
227140_at	---	---	---	-2.73186	-6.66642	1.45e-06	6.5e-06
206550_s_at	NUP155	nucleoporin 155kDa	9631	-2.73155	-9.76197	3.41e-09	2.79e-08
208474_at	CLDN6	claudin 6	9074	-2.73083	-8.59603	2.88e-08	1.89e-07
222442_s_at	ARL8B	ADP-ribosylation factor-like 8B	55207	-2.72979	-6.47461	2.2e-06	9.5e-06
208119_s_at	ZNF93	zinc finger protein 93	81931	-2.72976	-12.6081	3.57e-11	4.88e-10
219349_s_at	EXOC2	exocyst complex component 2	55770	-2.72974	-7.69195	1.7e-07	9.26e-07
223062_s_at	PSAT1	phosphoserine aminotransferase 1	29968	-2.72874	-11.5938	1.65e-10	1.89e-09
212445_s_at	NEDD4L	neural precursor cell expressed, developmentally down-regulated 4-like	23327	-2.72798	-7.92767	1.06e-07	6.05e-07
1555772_a_at	CDC25A	cell division cycle 25 homolog A (S. pombe)	993	-2.72671	-7.33138	3.55e-07	1.81e-06
233543_s_at	FAM175A	family with sequence similarity 175, member A	84142	-2.72628	-8.09002	7.67e-08	4.52e-07
230597_at	SLC7A3	solute carrier family 7 (cationic amino acid transporter, y+ system), member 3	84889	-2.7261	-14.9838	1.41e-12	2.84e-11
218472_s_at	PELO	pelota homolog (Drosophila)	53918	-2.7248	-14.3608	3.15e-12	5.69e-11
222701_s_at	CHCHD7	coiled-coil-helix-coiled-coil-helix domain containing 7	79145	-2.72301	-7.29853	3.8e-07	1.92e-06
225541_at	RPL22L1	ribosomal protein L22-like 1	200916	-2.72294	-18.393	2.69e-14	8.76e-13
218735_s_at	ZNF544	zinc finger protein 544	27300	-2.72213	-12.4994	4.19e-11	5.61e-10
227718_at	PURB	purine-rich element binding protein B	5814	-2.71992	-10.3498	1.24e-09	1.14e-08
218984_at	PUS7	pseudouridylate synthase 7 homolog (S. cerevisiae)	54517	-2.7193	-11.8556	1.1e-10	1.32e-09
200692_s_at	HSPA9	heat shock 70kDa protein 9 (mortalin)	3313	-2.71891	-18.1408	3.53e-14	1.11e-12
215145_s_at	CNTNAP2	contactin associated protein-like 2	26047	-2.71844	-6.48863	2.13e-06	9.24e-06
219493_at	SHCBP1	SHC SH2-domain binding protein 1	79801	-2.71535	-7.79488	1.38e-07	7.68e-07
222753_s_at	SPCS3	signal peptidase complex subunit 3 homolog (S. cerevisiae)	60559	-2.71523	-13.0927	1.78e-11	2.63e-10
218156_s_at	TSR1	TSR1, 20S rRNA accumulation, homolog (S. cerevisiae)	55720	-2.71513	-11.8158	1.17e-10	1.39e-09
222216_s_at	MRPL17	mitochondrial ribosomal protein L17	63875	-2.71391	-10.3321	1.28e-09	1.17e-08
200611_s_at	WDR1	WD repeat domain 1	9948	-2.71138	-10.4754	1e-09	9.42e-09
204049_s_at	PHACTR2	phosphatase and actin regulator 2	9749	-2.71036	-16.3689	2.59e-13	6.33e-12
227628_at	GPX8	glutathione peroxidase 8 (putative)	493869	-2.71035	-18.6752	2e-14	6.78e-13
223413_s_at	LYAR	Ly1 antibody reactive homolog (mouse)	55646	-2.71004	-8.17541	6.48e-08	3.89e-07
209434_s_at	PPAT	phosphoribosyl pyrophosphate amidotransferase	5471	-2.70969	-9.40017	6.49e-09	4.96e-08
209131_s_at	SNAP23	synaptosomal-associated protein, 23kDa	8773	-2.70954	-9.0753	1.17e-08	8.46e-08
227653_at	TRMT5	TRM5 tRNA methyltransferase 5 homolog (S. cerevisiae)	57570	-2.70907	-9.84085	2.97e-09	2.47e-08
234304_s_at	IPO11	importin 11	51194	-2.70744	-9.422	6.24e-09	4.79e-08
225737_s_at	FBXO22	F-box protein 22	26263	-2.70735	-10.6736	7.21e-10	7.04e-09
211470_s_at	SULT1C2	sulfotransferase family, cytosolic, 1C, member 2	6819	-2.69926	-12.5209	4.06e-11	5.47e-10
208897_s_at	DDX18	DEAD (Asp-Glu-Ala-Asp) box polypeptide 18	8886	-2.69907	-7.83953	1.26e-07	7.09e-07
226463_at	ATP6V1C1	ATPase, H+ transporting, lysosomal 42kDa, V1 subunit C1	528	-2.6984	-10.4982	9.65e-10	9.12e-09
1558943_x_at	ZNF765	zinc finger protein 765	91661	-2.69754	-10.8751	5.18e-10	5.24e-09
203791_at	DMXL1	Dmx-like 1	1657	-2.69749	-7.7237	1.59e-07	8.74e-07
213325_at	PVRL3	poliovirus receptor-related 3	25945	-2.69411	-6.50448	2.06e-06	8.96e-06
205924_at	RAB3B	RAB3B, member RAS oncogene family	5865	-2.6931	-10.7996	5.86e-10	5.84e-09
228238_at	GAS5	growth arrest-specific 5 (non-protein coding)	60674	-2.69032	-13.5508	9.37e-12	1.49e-10
219340_s_at	CLN8	ceroid-lipofuscinosis, neuronal 8 (epilepsy, progressive with mental retardation)	2055	-2.68985	-16.9863	1.27e-13	3.37e-12
208296_x_at	TNFAIP8	tumor necrosis factor, alpha-induced protein 8	25816	-2.68854	-12.7343	2.97e-11	4.13e-10
205930_at	GTF2E1	general transcription factor IIE, polypeptide 1, alpha 56kDa	2960	-2.68835	-13.7146	7.48e-12	1.22e-10
208079_s_at	AURKA	aurora kinase A	6790	-2.68766	-9.55014	4.96e-09	3.9e-08
219276_x_at	C9orf82	chromosome 9 open reading frame 82	79886	-2.68737	-7.41702	2.98e-07	1.54e-06
217901_at	DSG2	desmoglein 2	1829	-2.68657	-14.8913	1.58e-12	3.13e-11
220199_s_at	AIDA	axin interactor, dorsalization associated	64853	-2.68644	-5.01144	6.08e-05	0.000197411
218186_at	RAB25	RAB25, member RAS oncogene family	57111	-2.68637	-9.62158	4.37e-09	3.49e-08
225621_at	ALG2	asparagine-linked glycosylation 2, alpha-1,3-mannosyltransferase homolog (S. cerevisiae)	85365	-2.68606	-12.0361	8.36e-11	1.03e-09
202069_s_at	IDH3A	isocitrate dehydrogenase 3 (NAD+) alpha	3419	-2.68506	-9.5386	5.07e-09	3.97e-08
235181_at	C2orf60	chromosome 2 open reading frame 60	129450	-2.68486	-13.668	7.98e-12	1.29e-10
225736_at	FBXO22	F-box protein 22	26263	-2.68396	-18.0996	3.69e-14	1.15e-12
204751_x_at	DSC2	desmocollin 2	1824	-2.68381	-5.68094	1.29e-05	4.79e-05
215022_x_at	ZNF33B	zinc finger protein 33B	7582	-2.68371	-7.62887	1.93e-07	1.04e-06
214720_x_at	2011-09-10	septin 10	151011	-2.68344	-5.56095	1.7e-05	6.16e-05
232111_at	LOC730125	Hypothetical LOC730125	730125	-2.68344	-15.8106	5.05e-13	1.15e-11
231396_s_at	FAM126A	family with sequence similarity 126, member A	84668	-2.68341	-12.0317	8.41e-11	1.04e-09
203373_at	SOCS2	suppressor of cytokine signaling 2	8835	-2.6827	-14.189	3.95e-12	6.95e-11
233233_at	---	---	---	-2.68137	-12.6635	3.29e-11	4.53e-10
211150_s_at	DLAT	dihydrolipoamide S-acetyltransferase	1737	-2.68134	-8.80732	1.93e-08	1.32e-07
231995_at	C9orf82	chromosome 9 open reading frame 82	79886	-2.68023	-7.7593	1.48e-07	8.2e-07
212371_at	PPPDE1	PPPDE peptidase domain containing 1	51029	-2.67783	-10.536	9.06e-10	8.62e-09
202884_s_at	PPP2R1B	protein phosphatase 2 (formerly 2A), regulatory subunit A, beta isoform	5519	-2.67725	-12.7013	3.12e-11	4.31e-10
221690_s_at	NLRP2	NLR family, pyrin domain containing 2	55655	-2.67642	-19.247	1.11e-14	4e-13
228181_at	SLC30A1	solute carrier family 30 (zinc transporter), member 1	7779	-2.67552	-7.79648	1.37e-07	7.65e-07
208691_at	TFRC	transferrin receptor (p90, CD71)	7037	-2.67355	-14.5668	2.4e-12	4.49e-11
235006_at	CDKN2AIPNL	CDKN2A interacting protein N-terminal like	91368	-2.67343	-11.2192	2.97e-10	3.2e-09
218338_at	PHC1 /// PHC1B	polyhomeotic homolog 1 (Drosophila) /// polyhomeotic homolog 1B (Drosophila)	1911 /// 653441	-2.67279	-19.1568	1.21e-14	4.35e-13
210567_s_at	SKP2	S-phase kinase-associated protein 2 (p45)	6502	-2.67109	-10.2619	1.44e-09	1.3e-08
219291_at	DTWD1	DTW domain containing 1	56986	-2.67079	-19.1342	1.24e-14	4.43e-13
203455_s_at	SAT1	spermidine/spermine N1-acetyltransferase 1	6303	-2.67046	-14.1984	3.9e-12	6.88e-11
205573_s_at	SNX7	sorting nexin 7	51375	-2.66941	-16.4066	2.48e-13	6.07e-12
213427_at	RPP40	ribonuclease P/MRP 40kDa subunit	10799	-2.66899	-14.0355	4.85e-12	8.29e-11
219942_at	MYL7	myosin, light chain 7, regulatory	58498	-2.66729	-8.28764	5.21e-08	3.2e-07
220941_s_at	C21orf91	chromosome 21 open reading frame 91	54149	-2.66674	-12.9174	2.28e-11	3.27e-10
201689_s_at	TPD52	tumor protein D52	7163	-2.66533	-7.29111	3.86e-07	1.95e-06
204956_at	MTAP	methylthioadenosine phosphorylase	4507	-2.66456	-8.27888	5.3e-08	3.25e-07
204853_at	ORC2L	origin recognition complex, subunit 2-like (yeast)	4999	-2.66302	-15.5305	7.11e-13	1.57e-11
220094_s_at	CCDC90A	coiled-coil domain containing 90A	63933	-2.66273	-15.7644	5.34e-13	1.21e-11
219300_s_at	CNTNAP2	contactin associated protein-like 2	26047	-2.66137	-9.59275	4.6e-09	3.65e-08
232835_at	---	---	---	-2.66113	-11.2518	2.82e-10	3.05e-09
201596_x_at	KRT18	keratin 18	3875	-2.65929	-17.8284	4.95e-14	1.49e-12
210041_s_at	PGM3	phosphoglucomutase 3	5238	-2.6587	-13.2377	1.45e-11	2.19e-10
226876_at	FAM101B	family with sequence similarity 101, member B	359845	-2.65843	-14.357	3.16e-12	5.71e-11
212501_at	CEBPB	CCAAT/enhancer binding protein (C/EBP), beta	1051	-2.65485	-15.5434	7e-13	1.55e-11
238156_at	---	---	---	-2.65468	-10.5678	8.59e-10	8.23e-09
242127_at	---	---	---	-2.65428	-12.0146	8.63e-11	1.06e-09
1553132_a_at	TC2N	tandem C2 domains, nuclear	123036	-2.65361	-18.736	1.88e-14	6.41e-13
212157_at	SDC2	syndecan 2	6383	-2.65031	-10.2868	1.38e-09	1.25e-08
218775_s_at	WWC2	WW and C2 domain containing 2	80014	-2.64894	-8.58217	2.96e-08	1.94e-07
218739_at	ABHD5	abhydrolase domain containing 5	51099	-2.64792	-10.2909	1.37e-09	1.25e-08
214853_s_at	SHC1	SHC (Src homology 2 domain containing) transforming protein 1	6464	-2.64668	-20.6398	2.79e-15	1.22e-13
1561631_at	---	---	---	-2.64663	-15.006	1.37e-12	2.77e-11
212917_x_at	RECQL	RecQ protein-like (DNA helicase Q1-like)	5965	-2.64603	-5.96186	6.85e-06	2.68e-05
211275_s_at	GYG1	glycogenin 1	2992	-2.64555	-14.7835	1.82e-12	3.53e-11
244640_at	ZNF850P	zinc finger protein 850 pseudogene	342892	-2.64534	-10.7105	6.78e-10	6.66e-09
225861_at	C16orf14	chromosome 16 open reading frame 14	84331	-2.64532	-11.511	1.87e-10	2.12e-09
236312_at	---	---	---	-2.64528	-9.59292	4.6e-09	3.65e-08
214149_s_at	ATP6V0E1	ATPase, H+ transporting, lysosomal 9kDa, V0 subunit e1	8992	-2.64382	-2.64385	0.0152988	0.0300179
243000_at	CDK6	cyclin-dependent kinase 6	1021	-2.63916	-12.3957	4.88e-11	6.4e-10
201300_s_at	PRNP	prion protein	5621	-2.63883	-11.5895	1.66e-10	1.91e-09
203837_at	MAP3K5	mitogen-activated protein kinase kinase kinase 5	4217	-2.63853	-10.7214	6.66e-10	6.55e-09
233268_s_at	CHURC1	churchill domain containing 1	91612	-2.63815	-8.87464	1.7e-08	1.18e-07
212688_at	PIK3CB	phosphoinositide-3-kinase, catalytic, beta polypeptide	5291	-2.63689	-6.86931	9.38e-07	4.38e-06
209130_at	SNAP23	synaptosomal-associated protein, 23kDa	8773	-2.63647	-12.4384	4.58e-11	6.07e-10
223402_at	DUSP23	dual specificity phosphatase 23	54935	-2.63528	-11.8845	1.05e-10	1.27e-09
205738_s_at	FABP3	fatty acid binding protein 3, muscle and heart (mammary-derived growth inhibitor)	2170	-2.63498	-11.9068	1.02e-10	1.23e-09
208872_s_at	REEP5	receptor accessory protein 5	7905	-2.63461	-9.50098	5.42e-09	4.22e-08
200701_at	NPC2	Niemann-Pick disease, type C2	10577	-2.6346	-10.0085	2.22e-09	1.91e-08
204203_at	CEBPG	CCAAT/enhancer binding protein (C/EBP), gamma	1054	-2.63385	-13.0908	1.78e-11	2.63e-10
201912_s_at	GSPT1	G1 to S phase transition 1	2935	-2.63333	-11.7036	1.39e-10	1.63e-09
219557_s_at	NRIP3	nuclear receptor interacting protein 3	56675	-2.62781	-11.816	1.17e-10	1.39e-09
208190_s_at	LSR	lipolysis stimulated lipoprotein receptor	51599	-2.62692	-11.0243	4.06e-10	4.23e-09
223665_at	ARPM1	actin related protein M1	84517	-2.62663	-9.6435	4.2e-09	3.37e-08
237054_at	ENPP5	ectonucleotide pyrophosphatase/phosphodiesterase 5 (putative function)	59084	-2.62419	-15.4182	8.16e-13	1.77e-11
1555561_a_at	UGCGL2	UDP-glucose ceramide glucosyltransferase-like 2	55757	-2.62402	-10.5702	8.56e-10	8.2e-09
232667_at	---	---	---	-2.62344	-7.82649	1.29e-07	7.25e-07
218737_at	SBNO1	strawberry notch homolog 1 (Drosophila)	55206	-2.62255	-5.2024	3.9e-05	0.000131305
209735_at	ABCG2	ATP-binding cassette, sub-family G (WHITE), member 2	9429	-2.62015	-11.9738	9.18e-11	1.12e-09
212514_x_at	DDX3X	DEAD (Asp-Glu-Ala-Asp) box polypeptide 3, X-linked	1654	-2.6192	-5.22923	3.66e-05	0.000124066
52285_f_at	CEP76	centrosomal protein 76kDa	79959	-2.61888	-8.07736	7.86e-08	4.62e-07
223837_at	GULP1	GULP, engulfment adaptor PTB domain containing 1	51454	-2.61764	-13.0007	2.03e-11	2.94e-10
218188_s_at	TIMM13	translocase of inner mitochondrial membrane 13 homolog (yeast)	26517	-2.61638	-18.2195	3.24e-14	1.03e-12
205100_at	GFPT2	glutamine-fructose-6-phosphate transaminase 2	9945	-2.61414	-16.5186	2.17e-13	5.4e-12
227221_at	---	---	---	-2.61247	-12.8967	2.35e-11	3.36e-10
222714_s_at	LACTB2	lactamase, beta 2	51110	-2.61029	-8.91841	1.57e-08	1.1e-07
219740_at	VASH2	vasohibin 2	79805	-2.60939	-7.17582	4.91e-07	2.43e-06
205763_s_at	DDX18	DEAD (Asp-Glu-Ala-Asp) box polypeptide 18	8886	-2.60911	-5.65951	1.36e-05	5.02e-05
206085_s_at	CTH	cystathionase (cystathionine gamma-lyase)	1491	-2.60809	-13.0497	1.89e-11	2.78e-10
244597_at	LOC26010	Viral DNA polymerase-transactivated protein 6	26010	-2.60758	-9.30757	7.68e-09	5.77e-08
209720_s_at	SERPINB3	serpin peptidase inhibitor, clade B (ovalbumin), member 3	6317	-2.60716	-16.6207	1.93e-13	4.87e-12
218424_s_at	STEAP3	STEAP family member 3	55240	-2.60705	-10.8042	5.82e-10	5.81e-09
225320_at	CCDC109A	coiled-coil domain containing 109A	90550	-2.60532	-16.5762	2.03e-13	5.09e-12
226982_at	ELL2	elongation factor, RNA polymerase II, 2	22936	-2.60517	-9.45561	5.88e-09	4.54e-08
226750_at	LARP2	La ribonucleoprotein domain family, member 2	55132	-2.60425	-8.56541	3.05e-08	1.99e-07
1555679_a_at	RTN4IP1	reticulon 4 interacting protein 1	84816	-2.6032	-12.4618	4.42e-11	5.9e-10
227985_at	---	---	---	-2.60189	-15.0094	1.36e-12	2.76e-11
226169_at	SBF2	SET binding factor 2	81846	-2.60164	-6.52901	1.95e-06	8.53e-06
201471_s_at	SQSTM1	sequestosome 1	8878	-2.60147	-16.0744	3.67e-13	8.62e-12
235198_at	OSTM1	osteopetrosis associated transmembrane protein 1	28962	-2.60145	-11.4196	2.16e-10	2.41e-09
202511_s_at	ATG5	ATG5 autophagy related 5 homolog (S. cerevisiae)	9474	-2.60136	-16.1626	3.31e-13	7.88e-12
229061_s_at	SLC25A13	solute carrier family 25, member 13 (citrin)	10165	-2.60075	-6.37888	2.71e-06	1.15e-05
204269_at	PIM2	pim-2 oncogene	11040	-2.60066	-14.214	3.82e-12	6.76e-11
240616_at	LOC100131110	hypothetical protein LOC100131110	100131110	-2.60029	-9.037	1.26e-08	9.03e-08
205742_at	TNNI3	troponin I type 3 (cardiac)	7137	-2.60026	-10.0351	2.12e-09	1.83e-08
223898_at	ZNF670	zinc finger protein 670	93474	-2.59982	-8.75737	2.12e-08	1.44e-07
222631_at	PI4K2B	phosphatidylinositol 4-kinase type 2 beta	55300	-2.59979	-9.32255	7.47e-09	5.62e-08
203712_at	KIAA0020	KIAA0020	9933	-2.59972	-15.5911	6.6e-13	1.47e-11
202118_s_at	CPNE3	copine III	8895	-2.59806	-2.57449	0.0178013	0.0343298
219935_at	ADAMTS5	ADAM metallopeptidase with thrombospondin type 1 motif, 5	11096	-2.5966	-14.2464	3.66e-12	6.51e-11
222316_at	---	---	---	-2.59642	-12.7324	2.98e-11	4.14e-10
209836_x_at	BOLA2 /// BOLA2B	bolA homolog 2 (E. coli) /// bolA homolog 2B (E. coli)	552900 /// 654483	-2.59585	-11.3499	2.42e-10	2.66e-09
223311_s_at	MTA3	metastasis associated 1 family, member 3	57504	-2.59407	-15.1952	1.08e-12	2.26e-11
1554001_at	TRIM37	tripartite motif-containing 37	4591	-2.5933	-13.9989	5.09e-12	8.65e-11
238465_at	C5orf35	chromosome 5 open reading frame 35	133383	-2.59257	-13.7534	7.1e-12	1.17e-10
219628_at	ZMAT3	zinc finger, matrin type 3	64393	-2.59214	-12.2958	5.66e-11	7.31e-10
228029_at	ZNF721	zinc finger protein 721	170960	-2.59188	-13.6861	7.78e-12	1.26e-10
222730_s_at	ZDHHC2	zinc finger, DHHC-type containing 2	51201	-2.5918	-15.319	9.24e-13	1.97e-11
232060_at	ROR1	receptor tyrosine kinase-like orphan receptor 1	4919	-2.59076	-9.5084	5.35e-09	4.17e-08
203746_s_at	HCCS	holocytochrome c synthase (cytochrome c heme-lyase)	3052	-2.58871	-15.6852	5.88e-13	1.32e-11
203126_at	IMPA2	inositol(myo)-1(or 4)-monophosphatase 2	3613	-2.58587	-14.0455	4.78e-12	8.2e-11
210999_s_at	GRB10	growth factor receptor-bound protein 10	2887	-2.58583	-15.4585	7.77e-13	1.69e-11
221437_s_at	MRPS15	mitochondrial ribosomal protein S15	64960	-2.58334	-7.88467	1.15e-07	6.54e-07
213217_at	ADCY2 /// LOC100133953	adenylate cyclase 2 (brain) /// similar to adenylate cyclase 2	100133953 /// 108	-2.58226	-17.8466	4.85e-14	1.47e-12
202713_s_at	KIAA0391	KIAA0391	9692	-2.58225	-12.23	6.24e-11	7.99e-10
221434_s_at	C14orf156	chromosome 14 open reading frame 156	81892	-2.58059	-11.057	3.86e-10	4.04e-09
220391_at	ZBTB3	zinc finger and BTB domain containing 3	79842	-2.58047	-13.8899	5.9e-12	9.81e-11
1558522_at	---	---	---	-2.57975	-9.68586	3.9e-09	3.15e-08
205386_s_at	MDM2	Mdm2 p53 binding protein homolog (mouse)	4193	-2.57947	-8.73314	2.22e-08	1.5e-07
204256_at	ELOVL6	ELOVL family member 6, elongation of long chain fatty acids (FEN1/Elo2, SUR4/Elo3-like, yeast)	79071	-2.57926	-9.80612	3.16e-09	2.6e-08
223687_s_at	LY6K	lymphocyte antigen 6 complex, locus K	54742	-2.57839	-11.7982	1.2e-10	1.43e-09
223178_s_at	NT5DC1	5'-nucleotidase domain containing 1	221294	-2.57775	-14.8439	1.68e-12	3.28e-11
218564_at	RFWD3	ring finger and WD repeat domain 3	55159	-2.576	-7.51864	2.42e-07	1.27e-06
206675_s_at	SKIL	SKI-like oncogene	6498	-2.57568	-9.86937	2.83e-09	2.36e-08
205024_s_at	RAD51	RAD51 homolog (RecA homolog, E. coli) (S. cerevisiae)	5888	-2.57395	-16.5997	1.98e-13	4.97e-12
228335_at	CLDN11	claudin 11	5010	-2.57375	-10.4747	1e-09	9.43e-09
223079_s_at	GLS	glutaminase	2744	-2.57346	-5.11665	4.76e-05	0.000157404
201657_at	ARL1	ADP-ribosylation factor-like 1	400	-2.57304	-7.93359	1.05e-07	5.98e-07
223824_at	RNLS	renalase, FAD-dependent amine oxidase	55328	-2.57238	-8.95047	1.48e-08	1.04e-07
232202_at	---	---	---	-2.57177	-7.73191	1.57e-07	8.61e-07
235113_at	PPIL5	peptidylprolyl isomerase (cyclophilin)-like 5	122769	-2.57126	-13.282	1.36e-11	2.08e-10
218594_at	HEATR1	HEAT repeat containing 1	55127	-2.57092	-9.1889	9.53e-09	7.01e-08
234660_s_at	DIS3	DIS3 mitotic control homolog (S. cerevisiae)	22894	-2.57052	-5.27307	3.31e-05	0.000113059
200841_s_at	EPRS	glutamyl-prolyl-tRNA synthetase	2058	-2.56612	-4.76019	0.000109798	0.000337786
225580_at	MRPL50	mitochondrial ribosomal protein L50	54534	-2.56594	-9.45852	5.85e-09	4.52e-08
1553180_at	ADAMTS19	ADAM metallopeptidase with thrombospondin type 1 motif, 19	171019	-2.56214	-8.84792	1.79e-08	1.24e-07
1553979_at	---	---	---	-2.56131	-15.4183	8.16e-13	1.77e-11
231973_s_at	ANAPC1	anaphase promoting complex subunit 1	64682	-2.5599	-9.7737	3.34e-09	2.74e-08
220038_at	C8orf44 /// SGK3	chromosome 8 open reading frame 44 /// serum/glucocorticoid regulated kinase family, member 3	23678 /// 56260	-2.55942	-7.45275	2.76e-07	1.44e-06
226524_at	C3orf38	chromosome 3 open reading frame 38	285237	-2.5594	-7.92997	1.05e-07	6.02e-07
225155_at	SNHG5	small nucleolar RNA host gene 5 (non-protein coding)	387066	-2.55931	-18.776	1.8e-14	6.19e-13
241255_at	---	---	---	-2.5591	-14.9333	1.5e-12	3e-11
219080_s_at	CTPS2	CTP synthase II	56474	-2.55879	-9.00141	1.35e-08	9.59e-08
213578_at	BMPR1A	bone morphogenetic protein receptor, type IA	657	-2.5573	-10.615	7.95e-10	7.66e-09
227123_at	RAB3B	RAB3B, member RAS oncogene family	5865	-2.55693	-14.3979	3e-12	5.46e-11
222946_s_at	C1orf135	chromosome 1 open reading frame 135	79000	-2.55666	-13.7174	7.46e-12	1.22e-10
218513_at	C4orf43	chromosome 4 open reading frame 43	55319	-2.5566	-8.69875	2.37e-08	1.59e-07
1552344_s_at	CNOT7	CCR4-NOT transcription complex, subunit 7	29883	-2.55536	-6.68741	1.39e-06	6.25e-06
202352_s_at	PSMD12	proteasome (prosome, macropain) 26S subunit, non-ATPase, 12	5718	-2.55429	-12.8616	2.47e-11	3.51e-10
231407_s_at	FOXH1	forkhead box H1	8928	-2.55406	-11.1886	3.12e-10	3.34e-09
204875_s_at	GMDS	GDP-mannose 4,6-dehydratase	2762	-2.554	-10.1029	1.89e-09	1.65e-08
205194_at	PSPH	phosphoserine phosphatase	5723	-2.55327	-11.9251	9.89e-11	1.2e-09
229417_at	---	---	---	-2.55074	-9.86174	2.86e-09	2.39e-08
220821_at	GALR1	galanin receptor 1	2587	-2.5505	-14.5586	2.43e-12	4.53e-11
1552613_s_at	CDC42SE2	CDC42 small effector 2	56990	-2.5503	-5.60348	1.54e-05	5.64e-05
225173_at	ARHGAP18	Rho GTPase activating protein 18	93663	-2.54965	-6.35122	2.88e-06	1.22e-05
224721_at	WDR75	WD repeat domain 75	84128	-2.54865	-10.1546	1.73e-09	1.52e-08
202144_s_at	ADSL	adenylosuccinate lyase	158	-2.54846	-13.9634	5.34e-12	9.02e-11
209822_s_at	VLDLR	very low density lipoprotein receptor	7436	-2.54837	-7.81297	1.33e-07	7.43e-07
212833_at	SLC25A46	solute carrier family 25, member 46	91137	-2.54834	-8.7483	2.16e-08	1.46e-07
202536_at	CHMP2B	chromatin modifying protein 2B	25978	-2.54675	-10.1352	1.78e-09	1.57e-08
202817_s_at	SS18	synovial sarcoma translocation, chromosome 18	6760	-2.54598	-4.14737	0.000469076	0.00127403
237465_at	USP53	ubiquitin specific peptidase 53	54532	-2.54419	-10.958	4.53e-10	4.65e-09
225864_at	FAM84B	family with sequence similarity 84, member B	157638	-2.54327	-7.58599	2.1e-07	1.13e-06
220547_s_at	FAM35A	family with sequence similarity 35, member A	54537	-2.54324	-12.3724	5.05e-11	6.61e-10
209679_s_at	SMAGP	small trans-membrane and glycosylated protein	57228	-2.53937	-14.2779	3.51e-12	6.28e-11
222417_s_at	SNX5	sorting nexin 5	27131	-2.5391	-13.7095	7.54e-12	1.23e-10
227152_at	C12orf35	chromosome 12 open reading frame 35	55196	-2.53821	-3.77274	0.00114061	0.00287352
206096_at	ZNF35	zinc finger protein 35	7584	-2.5373	-7.43434	2.87e-07	1.49e-06
217966_s_at	FAM129A	family with sequence similarity 129, member A	116496	-2.53562	-14.5569	2.44e-12	4.53e-11
222044_at	PCIF1	PDX1 C-terminal inhibiting factor 1	63935	-2.5343	-11.7685	1.26e-10	1.49e-09
218706_s_at	GRAMD3	GRAM domain containing 3	65983	-2.5314	-9.16812	9.9e-09	7.25e-08
210596_at	LOC100129513	similar to PRO0756	100129513	-2.53137	-12.2861	5.74e-11	7.41e-10
218398_at	MRPS30	mitochondrial ribosomal protein S30	10884	-2.53107	-20.2002	4.27e-15	1.76e-13
201157_s_at	NMT1	N-myristoyltransferase 1	4836	-2.53104	-12.9659	2.13e-11	3.08e-10
229305_at	MLF1IP	MLF1 interacting protein	79682	-2.53093	-7.26757	4.05e-07	2.04e-06
234976_x_at	SLC4A5	Solute carrier family 4, sodium bicarbonate cotransporter, member 5	57835	-2.53061	-13.9009	5.81e-12	9.69e-11
219730_at	MED18	mediator complex subunit 18	54797	-2.53052	-3.71732	0.00130028	0.00323552
227804_at	TLCD1	TLC domain containing 1	116238	-2.53029	-10.2576	1.45e-09	1.31e-08
211945_s_at	ITGB1	integrin, beta 1 (fibronectin receptor, beta polypeptide, antigen CD29 includes MDF2, MSK12)	3688	-2.53021	-9.53558	5.09e-09	3.98e-08
228544_s_at	CSRP2BP	CSRP2 binding protein	57325	-2.52905	-10.6059	8.07e-10	7.76e-09
1558511_s_at	FAM62B	family with sequence similarity 62 (C2 domain containing) member B	57488	-2.52841	-10.2509	1.46e-09	1.32e-08
212018_s_at	RSL1D1	ribosomal L1 domain containing 1	26156	-2.5271	-14.5028	2.61e-12	4.81e-11
231775_at	TNFRSF10A	tumor necrosis factor receptor superfamily, member 10a	8797	-2.52587	-13.0963	1.77e-11	2.62e-10
225788_at	C6orf153	chromosome 6 open reading frame 153	88745	-2.52479	-20.2769	3.96e-15	1.64e-13
232760_at	TEX15	testis expressed 15	56154	-2.52463	-6.54142	1.9e-06	8.32e-06
228283_at	CMC1	COX assembly mitochondrial protein homolog (S. cerevisiae)	152100	-2.52425	-15.9706	4.16e-13	9.61e-12
209160_at	AKR1C3	aldo-keto reductase family 1, member C3 (3-alpha hydroxysteroid dehydrogenase, type II)	8644	-2.52381	-10.2455	1.48e-09	1.33e-08
205226_at	PDGFRL	platelet-derived growth factor receptor-like	5157	-2.52337	-9.77866	3.31e-09	2.72e-08
221577_x_at	GDF15	growth differentiation factor 15	9518	-2.52336	-11.2578	2.8e-10	3.03e-09
208891_at	DUSP6	dual specificity phosphatase 6	1848	-2.52159	-10.3864	1.16e-09	1.08e-08
228970_at	ZBTB8OS	zinc finger and BTB domain containing 8 opposite strand	339487	-2.52119	-14.6411	2.18e-12	4.13e-11
235773_at	ZIK1	zinc finger protein interacting with K protein 1 homolog (mouse)	284307	-2.52089	-7.18613	4.8e-07	2.38e-06
212560_at	SORL1	sortilin-related receptor, L(DLR class) A repeats-containing	6653	-2.52034	-10.8023	5.83e-10	5.82e-09
60474_at	FERMT1	fermitin family homolog 1 (Drosophila)	55612	-2.52017	-17.1343	1.07e-13	2.91e-12
235241_at	SLC38A9	solute carrier family 38, member 9	153129	-2.51925	-6.4848	2.15e-06	9.31e-06
242157_at	CHD9	Chromodomain helicase DNA binding protein 9	80205	-2.51886	-14.203	3.88e-12	6.85e-11
211340_s_at	MCAM	melanoma cell adhesion molecule	4162	-2.5187	-11.9016	1.03e-10	1.24e-09
218092_s_at	AGFG1	ArfGAP with FG repeats 1	3267	-2.5184	-7.72093	1.6e-07	8.79e-07
236656_s_at	LOC100130506	hypothetical protein LOC100130506	100130506	-2.51616	-15.0216	1.34e-12	2.73e-11
228007_at	C6orf204	Chromosome 6 open reading frame 204	387119	-2.51615	-14.0002	5.08e-12	8.64e-11
217492_s_at	PTEN /// PTENP1	phosphatase and tensin homolog /// phosphatase and tensin homolog pseudogene 1	11191 /// 5728	-2.5147	-12.1767	6.76e-11	8.57e-10
224967_at	UGCG	UDP-glucose ceramide glucosyltransferase	7357	-2.51434	-7.80977	1.34e-07	7.48e-07
204352_at	TRAF5	TNF receptor-associated factor 5	7188	-2.51245	-9.31739	7.54e-09	5.67e-08
211177_s_at	TXNRD2	thioredoxin reductase 2	10587	-2.51061	-8.4027	4.17e-08	2.62e-07
219555_s_at	CENPN	centromere protein N	55839	-2.5101	-11.6028	1.62e-10	1.87e-09
225411_at	TMEM87B	transmembrane protein 87B	84910	-2.50885	-9.83187	3.02e-09	2.5e-08
223471_at	RAB3IP	RAB3A interacting protein (rabin3)	117177	-2.50847	-12.1945	6.58e-11	8.37e-10
204905_s_at	EEF1E1	eukaryotic translation elongation factor 1 epsilon 1	9521	-2.50744	-15.6358	6.24e-13	1.4e-11
221773_at	ELK3	ELK3, ETS-domain protein (SRF accessory protein 2)	2004	-2.50729	-6.80754	1.07e-06	4.93e-06
219361_s_at	AEN	apoptosis enhancing nuclease	64782	-2.50717	-14.3823	3.06e-12	5.55e-11
223650_s_at	NRBF2	nuclear receptor binding factor 2	29982	-2.50525	-11.0637	3.81e-10	4e-09
212637_s_at	WWP1	WW domain containing E3 ubiquitin protein ligase 1	11059	-2.50428	-8.08001	7.82e-08	4.59e-07
210653_s_at	BCKDHB	branched chain keto acid dehydrogenase E1, beta polypeptide	594	-2.50269	-14.495	2.64e-12	4.85e-11
206751_s_at	PCYT1B	phosphate cytidylyltransferase 1, choline, beta	9468	-2.50253	-11.9533	9.47e-11	1.15e-09
220990_s_at	MIR21 /// TMEM49	microRNA 21 /// transmembrane protein 49	406991 /// 81671	-2.50169	-9.78114	3.3e-09	2.71e-08
230520_at	AIG1	androgen-induced 1	51390	-2.50009	-13.4186	1.13e-11	1.75e-10
230733_at	---	---	---	-2.49962	-13.1259	1.7e-11	2.53e-10
219212_at	HSPA14	heat shock 70kDa protein 14	51182	-2.49953	-10.0105	2.21e-09	1.9e-08
218549_s_at	FAM82B	family with sequence similarity 82, member B	51115	-2.4981	-15.4485	7.86e-13	1.71e-11
213409_s_at	RHEB	Ras homolog enriched in brain	6009	-2.49773	-15.4138	8.21e-13	1.77e-11
218750_at	TAF1D	TATA box binding protein (TBP)-associated factor, RNA polymerase I, D, 41kDa	79101	-2.49762	-7.31252	3.69e-07	1.87e-06
242669_at	UFM1	Ubiquitin-fold modifier 1	51569	-2.49581	-5.49902	1.96e-05	7.02e-05
206668_s_at	SCAMP1	secretory carrier membrane protein 1	9522	-2.49477	-4.15904	0.00045625	0.00124191
242228_at	---	---	---	-2.49352	-9.64932	4.16e-09	3.34e-08
235389_at	PHF20	PHD finger protein 20	51230	-2.49116	-11.435	2.11e-10	2.36e-09
224707_at	C5orf32	chromosome 5 open reading frame 32	84418	-2.49038	-13.2165	1.49e-11	2.25e-10
1558942_at	ZNF765	zinc finger protein 765	91661	-2.48753	-9.59139	4.61e-09	3.65e-08
207431_s_at	DEGS1	degenerative spermatocyte homolog 1, lipid desaturase (Drosophila)	8560	-2.48717	-9.90456	2.66e-09	2.23e-08
209799_at	PRKAA1	protein kinase, AMP-activated, alpha 1 catalytic subunit	5562	-2.48498	-12.7192	3.04e-11	4.21e-10
230559_x_at	FGD4	FYVE, RhoGEF and PH domain containing 4	121512	-2.48468	-6.94907	7.92e-07	3.75e-06
212876_at	B4GALT4	UDP-Gal:betaGlcNAc beta 1,4- galactosyltransferase, polypeptide 4	8702	-2.48448	-12.7734	2.81e-11	3.93e-10
203042_at	LAMP2	lysosomal-associated membrane protein 2	3920	-2.4834	-10.6353	7.68e-10	7.44e-09
1554415_at	TAF5L	TAF5-like RNA polymerase II, p300/CBP-associated factor (PCAF)-associated factor, 65kDa	27097	-2.48278	-8.63757	2.66e-08	1.76e-07
59697_at	RAB15	RAB15, member RAS onocogene family	376267	-2.47962	-17.4319	7.66e-14	2.17e-12
214211_at	FTH1	ferritin, heavy polypeptide 1	2495	-2.47954	-13.926	5.62e-12	9.43e-11
210592_s_at	SAT1	spermidine/spermine N1-acetyltransferase 1	6303	-2.47882	-16.155	3.34e-13	7.94e-12
237159_x_at	AP1S3	adaptor-related protein complex 1, sigma 3 subunit	130340	-2.4788	-13.0126	1.99e-11	2.9e-10
225439_at	NUDCD1	NudC domain containing 1	84955	-2.47737	-12.1065	7.51e-11	9.39e-10
203434_s_at	MME	membrane metallo-endopeptidase	4311	-2.47714	-8.57654	2.99e-08	1.95e-07
201823_s_at	RNF14	ring finger protein 14	9604	-2.47622	-9.36427	6.93e-09	5.26e-08
201656_at	ITGA6	integrin, alpha 6	3655	-2.47539	-10.1942	1.61e-09	1.44e-08
225160_x_at	MDM2	Mdm2 p53 binding protein homolog (mouse)	4193	-2.47488	-14.5869	2.34e-12	4.39e-11
219984_s_at	HRASLS	HRAS-like suppressor	57110	-2.47461	-11.5669	1.72e-10	1.97e-09
208892_s_at	DUSP6	dual specificity phosphatase 6	1848	-2.47373	-12.6153	3.53e-11	4.83e-10
44790_s_at	C13orf18 /// PPP1R2P4	chromosome 13 open reading frame 18 /// protein phosphatase 1, regulatory (inhibitor) subunit 2 pseudogene 4	728970 /// 80183	-2.47211	-10.4118	1.12e-09	1.04e-08
227371_at	BAIAP2L1	BAI1-associated protein 2-like 1	55971	-2.47105	-10.218	1.55e-09	1.39e-08
201170_s_at	BHLHE40	basic helix-loop-helix family, member e40	8553	-2.47099	-14.2434	3.68e-12	6.53e-11
225609_at	GSR	glutathione reductase	2936	-2.47085	-10.8289	5.59e-10	5.61e-09
226276_at	TMEM167A	transmembrane protein 167A	153339	-2.46895	-9.45904	5.84e-09	4.52e-08
217540_at	FAM55C	family with sequence similarity 55, member C	91775	-2.46885	-7.8591	1.21e-07	6.85e-07
208478_s_at	BAX	BCL2-associated X protein	581	-2.46787	-6.58918	1.71e-06	7.56e-06
224899_s_at	MAGT1	magnesium transporter 1	84061	-2.46378	-9.39557	6.55e-09	4.99e-08
237206_at	MYOCD	myocardin	93649	-2.46183	-11.667	1.47e-10	1.71e-09
228523_at	NANOS1	nanos homolog 1 (Drosophila)	340719	-2.46102	-7.23628	4.33e-07	2.16e-06
216652_s_at	DR1	down-regulator of transcription 1, TBP-binding (negative cofactor 2)	1810	-2.45721	-6.39212	2.63e-06	1.12e-05
225850_at	SFT2D1	SFT2 domain containing 1	113402	-2.45655	-8.04336	8.41e-08	4.91e-07
204053_x_at	PTEN	phosphatase and tensin homolog	5728	-2.45598	-10.6859	7.07e-10	6.91e-09
205909_at	POLE2	polymerase (DNA directed), epsilon 2 (p59 subunit)	5427	-2.45485	-10.8373	5.51e-10	5.55e-09
207949_s_at	ICA1	islet cell autoantigen 1, 69kDa	3382	-2.4542	-9.55249	4.94e-09	3.88e-08
1553603_s_at	ATL2	atlastin GTPase 2	64225	-2.4527	-5.15423	4.36e-05	0.00014529
222775_s_at	MRPL35	mitochondrial ribosomal protein L35	51318	-2.45145	-9.92444	2.57e-09	2.17e-08
218258_at	POLR1D	polymerase (RNA) I polypeptide D, 16kDa	51082	-2.45112	-13.7179	7.45e-12	1.22e-10
209545_s_at	RIPK2	receptor-interacting serine-threonine kinase 2	8767	-2.45094	-15.3227	9.19e-13	1.96e-11
204709_s_at	KIF23	kinesin family member 23	9493	-2.45047	-8.06847	8e-08	4.69e-07
1555725_a_at	RGS5	regulator of G-protein signaling 5	8490	-2.44997	-4.32613	0.000306801	0.000862675
218701_at	LACTB2	lactamase, beta 2	51110	-2.44919	-10.1978	1.6e-09	1.43e-08
225402_at	TP53RK	TP53 regulating kinase	112858	-2.44918	-11.2692	2.75e-10	2.98e-09
235696_at	---	---	---	-2.44848	-13.947	5.46e-12	9.19e-11
204597_x_at	STC1	stanniocalcin 1	6781	-2.44624	-9.00787	1.33e-08	9.5e-08
228357_at	UNK	unkempt homolog (Drosophila)	85451	-2.44573	-12.758	2.87e-11	4e-10
201337_s_at	VAMP3	vesicle-associated membrane protein 3 (cellubrevin)	9341	-2.44565	-6.46813	2.23e-06	9.61e-06
37433_at	PIAS2	protein inhibitor of activated STAT, 2	9063	-2.44456	-6.73383	1.25e-06	5.69e-06
213647_at	DNA2	DNA replication helicase 2 homolog (yeast)	1763	-2.44416	-9.12524	1.07e-08	7.78e-08
219002_at	FASTKD1	FAST kinase domains 1	79675	-2.4439	-10.2296	1.52e-09	1.36e-08
218517_at	PHF17	PHD finger protein 17	79960	-2.44327	-14.8997	1.57e-12	3.11e-11
214169_at	UNC84A	unc-84 homolog A (C. elegans)	23353	-2.44105	-10.3978	1.14e-09	1.06e-08
209709_s_at	HMMR	hyaluronan-mediated motility receptor (RHAMM)	3161	-2.43987	-5.6937	1.26e-05	4.67e-05
227408_s_at	SNX25	sorting nexin 25	83891	-2.4394	-10.2732	1.41e-09	1.28e-08
210260_s_at	TNFAIP8	tumor necrosis factor, alpha-induced protein 8	25816	-2.43873	-8.25746	5.52e-08	3.38e-07
217665_at	---	---	---	-2.43793	-8.69969	2.37e-08	1.59e-07
227211_at	PHF19	PHD finger protein 19	26147	-2.43711	-14.5787	2.37e-12	4.43e-11
225161_at	GFM1	G elongation factor, mitochondrial 1	85476	-2.43657	-4.68898	0.000129889	0.000393874
211404_s_at	APLP2	amyloid beta (A4) precursor-like protein 2	334	-2.43614	-16.0605	3.73e-13	8.73e-12
201399_s_at	TRAM1	translocation associated membrane protein 1	23471	-2.43584	-11.1494	3.32e-10	3.54e-09
224509_s_at	RTN4IP1	reticulon 4 interacting protein 1	84816	-2.43365	-12.5532	3.87e-11	5.24e-10
218238_at	GTPBP4	GTP binding protein 4	23560	-2.43343	-10.6593	7.38e-10	7.18e-09
225378_at	VPS37A	vacuolar protein sorting 37 homolog A (S. cerevisiae)	137492	-2.43334	-10.7202	6.68e-10	6.56e-09
222457_s_at	LIMA1	LIM domain and actin binding 1	51474	-2.43086	-10.4985	9.65e-10	9.11e-09
224799_at	NDFIP2	Nedd4 family interacting protein 2	54602	-2.43024	-12.3519	5.21e-11	6.78e-10
203827_at	WIPI1	WD repeat domain, phosphoinositide interacting 1	55062	-2.42973	-12.8823	2.4e-11	3.42e-10
1557918_s_at	SLC16A1	solute carrier family 16, member 1 (monocarboxylic acid transporter 1)	6566	-2.42911	-13.048	1.89e-11	2.78e-10
205214_at	STK17B	serine/threonine kinase 17b	9262	-2.4287	-8.96087	1.45e-08	1.03e-07
220892_s_at	PSAT1	phosphoserine aminotransferase 1	29968	-2.42854	-9.28713	7.97e-09	5.97e-08
217523_at	CD44	CD44 molecule (Indian blood group)	960	-2.42672	-14.9479	1.47e-12	2.95e-11
201211_s_at	DDX3X	DEAD (Asp-Glu-Ala-Asp) box polypeptide 3, X-linked	1654	-2.42642	-6.73405	1.25e-06	5.69e-06
1566901_at	TGIF1	TGFB-induced factor homeobox 1	7050	-2.42615	-7.13953	5.3e-07	2.6e-06
209314_s_at	HBS1L	HBS1-like (S. cerevisiae)	10767	-2.42608	-8.31749	4.92e-08	3.04e-07
203297_s_at	JARID2	jumonji, AT rich interactive domain 2	3720	-2.42544	-14.1687	4.06e-12	7.12e-11
209895_at	PTPN11	protein tyrosine phosphatase, non-receptor type 11	5781	-2.4247	-7.79921	1.37e-07	7.62e-07
214150_x_at	ATP6V0E1	ATPase, H+ transporting, lysosomal 9kDa, V0 subunit e1	8992	-2.42328	-21.1571	1.71e-15	8.02e-14
218276_s_at	SAV1	salvador homolog 1 (Drosophila)	60485	-2.42225	-9.61807	4.4e-09	3.51e-08
223253_at	EPDR1	ependymin related protein 1 (zebrafish)	54749	-2.42042	-10.8994	4.98e-10	5.06e-09
205677_s_at	DLEU1	deleted in lymphocytic leukemia 1 (non-protein coding)	10301	-2.41944	-15.9512	4.26e-13	9.83e-12
205704_s_at	ATP6V0A2	ATPase, H+ transporting, lysosomal V0 subunit a2	23545	-2.41931	-9.92396	2.57e-09	2.17e-08
205588_s_at	FGFR1OP	FGFR1 oncogene partner	11116	-2.41893	-13.5038	1e-11	1.58e-10
214117_s_at	BTD	biotinidase	686	-2.4189	-7.86064	1.21e-07	6.83e-07
235363_at	---	---	---	-2.41787	-8.80726	1.93e-08	1.32e-07
203282_at	GBE1	glucan (1,4-alpha-), branching enzyme 1	2632	-2.41674	-12.2579	5.99e-11	7.7e-10
202053_s_at	ALDH3A2	aldehyde dehydrogenase 3 family, member A2	224	-2.41514	-14.9051	1.56e-12	3.09e-11
244749_at	---	---	---	-2.41497	-9.74015	3.54e-09	2.89e-08
205966_at	TAF13	TAF13 RNA polymerase II, TATA box binding protein (TBP)-associated factor, 18kDa	6884	-2.41456	-8.00983	8.98e-08	5.22e-07
223814_at	TRNT1	tRNA nucleotidyl transferase, CCA-adding, 1	51095	-2.41454	-8.99568	1.36e-08	9.68e-08
1555630_a_at	RAB34	RAB34, member RAS oncogene family	83871	-2.41323	-8.69851	2.37e-08	1.59e-07
218889_at	NOC3L	nucleolar complex associated 3 homolog (S. cerevisiae)	64318	-2.41295	-10.3406	1.26e-09	1.15e-08
230598_at	---	---	---	-2.41288	-10.4045	1.13e-09	1.05e-08
213419_at	APBB2	amyloid beta (A4) precursor protein-binding, family B, member 2	323	-2.41233	-11.012	4.15e-10	4.3e-09
211016_x_at	HSPA4	heat shock 70kDa protein 4	3308	-2.41162	-8.14383	6.9e-08	4.11e-07
205171_at	PTPN4	protein tyrosine phosphatase, non-receptor type 4 (megakaryocyte)	5775	-2.41116	-6.61015	1.64e-06	7.25e-06
214666_x_at	IREB2	iron-responsive element binding protein 2	3658	-2.4102	-5.62974	1.45e-05	5.34e-05
227314_at	ITGA2	integrin, alpha 2 (CD49B, alpha 2 subunit of VLA-2 receptor)	3673	-2.40958	-11.5351	1.81e-10	2.05e-09
222432_s_at	CCDC47	coiled-coil domain containing 47	57003	-2.40955	-11.543	1.78e-10	2.03e-09
210639_s_at	ATG5	ATG5 autophagy related 5 homolog (S. cerevisiae)	9474	-2.40928	-8.01261	8.94e-08	5.19e-07
214843_s_at	USP33	ubiquitin specific peptidase 33	23032	-2.40884	-3.80297	0.00106189	0.00269099
223748_at	SLC4A11	solute carrier family 4, sodium borate transporter, member 11	83959	-2.40873	-6.6132	1.63e-06	7.21e-06
238677_at	WDR36	WD repeat domain 36	134430	-2.40872	-6.4564	2.29e-06	9.83e-06
227690_at	GABRB3	gamma-aminobutyric acid (GABA) A receptor, beta 3	2562	-2.40862	-11.7014	1.39e-10	1.63e-09
213133_s_at	GCSH	glycine cleavage system protein H (aminomethyl carrier)	2653	-2.408	-7.79744	1.37e-07	7.64e-07
217234_s_at	EZR	ezrin	7430	-2.40782	-2.64374	0.0153025	0.0300232
214691_x_at	FAM63B	family with sequence similarity 63, member B	54629	-2.40765	-11.0175	4.11e-10	4.27e-09
201001_s_at	TMEM189-UBE2V1 /// UBE2V1	TMEM189-UBE2V1 readthrough transcript /// ubiquitin-conjugating enzyme E2 variant 1	387522 /// 7335	-2.4076	-13.1054	1.75e-11	2.59e-10
225520_at	MTHFD1L	methylenetetrahydrofolate dehydrogenase (NADP+ dependent) 1-like	25902	-2.40686	-11.6648	1.48e-10	1.72e-09
224617_at	ROD1	ROD1 regulator of differentiation 1 (S. pombe)	9991	-2.40652	-13.3358	1.26e-11	1.94e-10
201543_s_at	SAR1A	SAR1 homolog A (S. cerevisiae)	56681	-2.40569	-12.3083	5.55e-11	7.19e-10
209882_at	RIT1	Ras-like without CAAX 1	6016	-2.40497	-8.83383	1.84e-08	1.27e-07
208065_at	ST8SIA3	ST8 alpha-N-acetyl-neuraminide alpha-2,8-sialyltransferase 3	51046	-2.40444	-11.5574	1.74e-10	1.99e-09
216996_s_at	FASTKD2	FAST kinase domains 2	22868	-2.40429	-6.55462	1.85e-06	8.1e-06
211833_s_at	BAX	BCL2-associated X protein	581	-2.40405	-7.75175	1.5e-07	8.32e-07
224917_at	MIR21	microRNA 21	406991	-2.40175	-8.66032	2.55e-08	1.69e-07
202820_at	AHR	aryl hydrocarbon receptor	196	-2.4015	-14.658	2.14e-12	4.06e-11
227006_at	PPP1R14A	protein phosphatase 1, regulatory (inhibitor) subunit 14A	94274	-2.40129	-6.37012	2.76e-06	1.17e-05
221970_s_at	NOL11	nucleolar protein 11	25926	-2.40095	-6.86376	9.49e-07	4.42e-06
226905_at	FAM101B	family with sequence similarity 101, member B	359845	-2.39989	-12.1962	6.57e-11	8.35e-10
213320_at	PRMT3	protein arginine methyltransferase 3	10196	-2.399	-8.46225	3.72e-08	2.38e-07
235343_at	VASH2	vasohibin 2	79805	-2.39899	-8.21819	5.96e-08	3.61e-07
202026_at	SDHD	succinate dehydrogenase complex, subunit D, integral membrane protein	6392	-2.39775	-14.143	4.2e-12	7.35e-11
221808_at	RAB9A	RAB9A, member RAS oncogene family	9367	-2.39697	-16.2381	3.02e-13	7.26e-12
1556211_a_at	---	---	---	-2.39591	-7.75166	1.5e-07	8.32e-07
218622_at	NUP37	nucleoporin 37kDa	79023	-2.39465	-18.2652	3.09e-14	9.81e-13
239988_at	---	---	---	-2.39435	-15.4717	7.64e-13	1.67e-11
240231_at	---	---	---	-2.3943	-8.93287	1.53e-08	1.07e-07
226150_at	PPAPDC1B	phosphatidic acid phosphatase type 2 domain containing 1B	84513	-2.39426	-12.468	4.38e-11	5.86e-10
212149_at	EFR3A	EFR3 homolog A (S. cerevisiae)	23167	-2.39381	-9.72128	3.66e-09	2.98e-08
230734_x_at	---	---	---	-2.39211	-9.2901	7.92e-09	5.94e-08
210907_s_at	PDCD10	programmed cell death 10	11235	-2.39207	-17.9569	4.3e-14	1.32e-12
218966_at	MYO5C	myosin VC	55930	-2.39201	-18.585	2.2e-14	7.38e-13
211297_s_at	CDK7	cyclin-dependent kinase 7	1022	-2.39113	-14.0566	4.71e-12	8.1e-11
230623_x_at	USP28	ubiquitin specific peptidase 28	57646	-2.39002	-13.6463	8.22e-12	1.32e-10
223397_s_at	NIP7	nuclear import 7 homolog (S. cerevisiae)	51388	-2.3896	-11.556	1.75e-10	2e-09
212538_at	DOCK9	dedicator of cytokinesis 9	23348	-2.38853	-9.5902	4.62e-09	3.66e-08
225014_at	LOC389203	hypothetical protein LOC389203	389203	-2.38784	-15.0559	1.28e-12	2.63e-11
201436_at	EIF4E	eukaryotic translation initiation factor 4E	1977	-2.38762	-6.83013	1.02e-06	4.72e-06
226668_at	WDSUB1	WD repeat, sterile alpha motif and U-box domain containing 1	151525	-2.38699	-8.05663	8.19e-08	4.79e-07
37117_at	ARHGAP8 /// LOC553158 /// PRR5	Rho GTPase activating protein 8 /// PRR5-ARHGAP8 fusion /// proline rich 5 (renal)	23779 /// 553158 /// 55615	-2.38655	-10.2647	1.43e-09	1.29e-08
201662_s_at	ACSL3	acyl-CoA synthetase long-chain family member 3	2181	-2.38639	-8.34043	4.7e-08	2.92e-07
221637_s_at	C11orf48	chromosome 11 open reading frame 48	79081	-2.38575	-9.75937	3.43e-09	2.8e-08
218878_s_at	SIRT1	sirtuin (silent mating type information regulation 2 homolog) 1 (S. cerevisiae)	23411	-2.38504	-7.88549	1.15e-07	6.53e-07
1555963_x_at	B3GNT7	UDP-GlcNAc:betaGal beta-1,3-N-acetylglucosaminyltransferase 7	93010	-2.38369	-12.0183	8.58e-11	1.06e-09
218699_at	RAB7L1	RAB7, member RAS oncogene family-like 1	8934	-2.38329	-8.62905	2.7e-08	1.79e-07
202611_s_at	MED14	mediator complex subunit 14	9282	-2.38302	-6.62109	1.6e-06	7.1e-06
219675_s_at	UXS1	UDP-glucuronate decarboxylase 1	80146	-2.38284	-12.609	3.57e-11	4.87e-10
1553645_at	CCDC141	coiled-coil domain containing 141	285025	-2.38234	-10.0474	2.08e-09	1.79e-08
223774_at	SNHG12	small nucleolar RNA host gene 12 (non-protein coding)	85028	-2.38162	-7.98034	9.53e-08	5.5e-07
205743_at	STAC	SH3 and cysteine rich domain	6769	-2.38147	-10.7974	5.88e-10	5.86e-09
216241_s_at	TCEA1	transcription elongation factor A (SII), 1	6917	-2.38123	-7.09832	5.78e-07	2.82e-06
222411_s_at	SSR3	signal sequence receptor, gamma (translocon-associated protein gamma)	6747	-2.38073	-9.80826	3.15e-09	2.6e-08
203588_s_at	TFDP2	transcription factor Dp-2 (E2F dimerization partner 2)	7029	-2.38072	-13.4795	1.03e-11	1.63e-10
203347_s_at	MTF2	metal response element binding transcription factor 2	22823	-2.3802	-8.69237	2.4e-08	1.61e-07
200890_s_at	SSR1	signal sequence receptor, alpha	6745	-2.38018	-8.13901	6.96e-08	4.14e-07
1558501_at	DNM3	dynamin 3	26052	-2.38014	-15.1106	1.2e-12	2.47e-11
213137_s_at	PTPN2	protein tyrosine phosphatase, non-receptor type 2	5771	-2.37929	-12.7077	3.09e-11	4.27e-10
224714_at	MKI67IP	MKI67 (FHA domain) interacting nucleolar phosphoprotein	84365	-2.37816	-9.82925	3.03e-09	2.51e-08
219399_at	LIN7C	lin-7 homolog C (C. elegans)	55327	-2.37735	-5.70293	1.23e-05	4.58e-05
224710_at	RAB34	RAB34, member RAS oncogene family	83871	-2.37627	-12.2413	6.14e-11	7.87e-10
242767_at	LMCD1	LIM and cysteine-rich domains 1	29995	-2.37578	-17.5145	6.99e-14	2.01e-12
221761_at	ADSS	adenylosuccinate synthase	159	-2.37563	-7.1844	4.82e-07	2.39e-06
212160_at	XPOT	exportin, tRNA (nuclear export receptor for tRNAs)	11260	-2.37437	-8.3724	4.42e-08	2.76e-07
205395_s_at	MRE11A	MRE11 meiotic recombination 11 homolog A (S. cerevisiae)	4361	-2.37383	-8.23971	5.72e-08	3.48e-07
208727_s_at	CDC42	cell division cycle 42 (GTP binding protein, 25kDa)	998	-2.37381	-13.7125	7.51e-12	1.22e-10
238983_at	NSUN7	NOL1/NOP2/Sun domain family, member 7	79730	-2.37344	-7.8429	1.25e-07	7.05e-07
217728_at	S100A6	S100 calcium binding protein A6	6277	-2.3732	-8.72587	2.25e-08	1.52e-07
201318_s_at	MYL12A /// MYL12B	myosin, light chain 12A, regulatory, non-sarcomeric /// myosin, light chain 12B, regulatory	103910 /// 10627	-2.37195	-11.9915	8.94e-11	1.1e-09
214729_at	TWISTNB	TWIST neighbor	221830	-2.37181	-8.56256	3.07e-08	2e-07
206224_at	CST1	cystatin SN	1469	-2.37102	-9.76565	3.39e-09	2.77e-08
214744_s_at	RPL23	ribosomal protein L23	9349	-2.37069	-11.1047	3.57e-10	3.77e-09
214397_at	MBD2	methyl-CpG binding domain protein 2	8932	-2.36697	-11.28	2.7e-10	2.93e-09
226415_at	VAT1L	vesicle amine transport protein 1 homolog (T. californica)-like	57687	-2.36575	-13.5371	9.55e-12	1.51e-10
222634_s_at	TBL1XR1	transducin (beta)-like 1 X-linked receptor 1	79718	-2.36477	-8.64074	2.64e-08	1.75e-07
200971_s_at	SERP1	stress-associated endoplasmic reticulum protein 1	27230	-2.3642	-15.7142	5.67e-13	1.28e-11
209533_s_at	PLAA	phospholipase A2-activating protein	9373	-2.36358	-8.93965	1.51e-08	1.06e-07
200691_s_at	HSPA9	heat shock 70kDa protein 9 (mortalin)	3313	-2.36307	-9.47378	5.69e-09	4.41e-08
210681_s_at	USP15	ubiquitin specific peptidase 15	9958	-2.36263	-7.79233	1.39e-07	7.71e-07
209363_s_at	MED21	mediator complex subunit 21	9412	-2.36153	-6.82335	1.03e-06	4.78e-06
223556_at	HELLS	helicase, lymphoid-specific	3070	-2.36099	-9.27827	8.1e-09	6.05e-08
230127_at	---	---	---	-2.36091	-12.6217	3.5e-11	4.79e-10
210396_s_at	BOLA2 /// LOC440354 /// LOC595101	bolA homolog 2 (E. coli) /// PI-3-kinase-related kinase SMG-1 pseudogene /// PI-3-kinase-related kinase SMG-1 pseudogene	440354 /// 552900 /// 595101	-2.36082	-12.3998	4.85e-11	6.37e-10
244340_x_at	---	---	---	-2.36065	-10.4039	1.13e-09	1.05e-08
221556_at	CDC14B	CDC14 cell division cycle 14 homolog B (S. cerevisiae)	8555	-2.36064	-12.1305	7.25e-11	9.1e-10
203165_s_at	SLC33A1	solute carrier family 33 (acetyl-CoA transporter), member 1	9197	-2.36012	-6.11244	4.89e-06	1.98e-05
203407_at	PPL	periplakin	5493	-2.3599	-10.2833	1.39e-09	1.26e-08
203177_x_at	TFAM	transcription factor A, mitochondrial	7019	-2.35981	-12.4522	4.49e-11	5.97e-10
204319_s_at	RGS10	regulator of G-protein signaling 10	6001	-2.35794	-9.91431	2.61e-09	2.2e-08
215509_s_at	BUB1	budding uninhibited by benzimidazoles 1 homolog (yeast)	699	-2.35776	-10.3066	1.33e-09	1.22e-08
231192_at	---	---	---	-2.35738	-10.2566	1.45e-09	1.31e-08
201266_at	TXNRD1	thioredoxin reductase 1	7296	-2.35737	-8.40293	4.17e-08	2.62e-07
206214_at	PLA2G7	phospholipase A2, group VII (platelet-activating factor acetylhydrolase, plasma)	7941	-2.35725	-11.6135	1.6e-10	1.84e-09
203114_at	SSSCA1	Sjogren syndrome/scleroderma autoantigen 1	10534	-2.35672	-10.2429	1.48e-09	1.34e-08
210691_s_at	CACYBP	calcyclin binding protein	27101	-2.35602	-12.4512	4.49e-11	5.98e-10
229980_s_at	SNX5	sorting nexin 5	27131	-2.35542	-12.3877	4.94e-11	6.47e-10
209433_s_at	PPAT	phosphoribosyl pyrophosphate amidotransferase	5471	-2.35529	-11.1424	3.36e-10	3.57e-09
219649_at	ALG6	asparagine-linked glycosylation 6, alpha-1,3-glucosyltransferase homolog (S. cerevisiae)	29929	-2.35488	-8.63225	2.69e-08	1.78e-07
228281_at	C11orf82	chromosome 11 open reading frame 82	220042	-2.35383	-7.74368	1.53e-07	8.44e-07
219185_at	SIRT5	sirtuin (silent mating type information regulation 2 homolog) 5 (S. cerevisiae)	23408	-2.35244	-10.8439	5.45e-10	5.49e-09
219565_at	CYP20A1	cytochrome P450, family 20, subfamily A, polypeptide 1	57404	-2.35238	-12.9703	2.12e-11	3.06e-10
226478_at	TM7SF3	transmembrane 7 superfamily member 3	51768	-2.35051	-9.67629	3.97e-09	3.2e-08
201559_s_at	CLIC4	chloride intracellular channel 4	25932	-2.34765	-6.12754	4.73e-06	1.92e-05
208700_s_at	TKT	transketolase	7086	-2.34731	-14.7378	1.93e-12	3.71e-11
200815_s_at	PAFAH1B1	platelet-activating factor acetylhydrolase, isoform Ib, subunit 1 (45kDa)	5048	-2.34677	-10.0189	2.18e-09	1.88e-08
229331_at	SPATA18	spermatogenesis associated 18 homolog (rat)	132671	-2.34674	-5.83123	9.2e-06	3.51e-05
211603_s_at	ETV4	ets variant 4	2118	-2.34599	-7.26171	4.1e-07	2.06e-06
214285_at	FABP3	fatty acid binding protein 3, muscle and heart (mammary-derived growth inhibitor)	2170	-2.34358	-12.3855	4.95e-11	6.49e-10
219210_s_at	RAB8B	RAB8B, member RAS oncogene family	51762	-2.34115	-10.2421	1.49e-09	1.34e-08
210250_x_at	ADSL	adenylosuccinate lyase	158	-2.34115	-16.2725	2.9e-13	7.02e-12
215446_s_at	LOX	lysyl oxidase	4015	-2.33675	-6.37866	2.71e-06	1.15e-05
59705_at	SCLY	selenocysteine lyase	51540	-2.33646	-13.9334	5.56e-12	9.35e-11
223385_at	CYP2S1	cytochrome P450, family 2, subfamily S, polypeptide 1	29785	-2.33644	-8.5675	3.04e-08	1.98e-07
224173_s_at	MRPL30	mitochondrial ribosomal protein L30	51263	-2.3355	-8.89416	1.64e-08	1.15e-07
223515_s_at	COQ3	coenzyme Q3 homolog, methyltransferase (S. cerevisiae)	51805	-2.33541	-13.8976	5.84e-12	9.72e-11
220651_s_at	MCM10	minichromosome maintenance complex component 10	55388	-2.33409	-8.58011	2.97e-08	1.94e-07
1565823_at	---	---	---	-2.33387	-2.71773	0.0130005	0.0259575
206500_s_at	C14orf106	chromosome 14 open reading frame 106	55320	-2.33293	-7.06651	6.18e-07	3e-06
208853_s_at	CANX	calnexin	821	-2.33293	-11.8348	1.14e-10	1.36e-09
220240_s_at	TMCO3	transmembrane and coiled-coil domains 3	55002	-2.3321	-10.3901	1.16e-09	1.07e-08
208309_s_at	MALT1	mucosa associated lymphoid tissue lymphoma translocation gene 1	10892	-2.33183	-6.64469	1.52e-06	6.78e-06
229076_s_at	---	---	---	-2.33119	-4.73689	0.000116001	0.000355104
207813_s_at	FDXR	ferredoxin reductase	2232	-2.33102	-9.98736	2.3e-09	1.97e-08
209864_at	FRAT2	frequently rearranged in advanced T-cell lymphomas 2	23401	-2.33088	-10.6602	7.37e-10	7.18e-09
226110_at	PTAR1	protein prenyltransferase alpha subunit repeat containing 1	375743	-2.33058	-8.36757	4.46e-08	2.78e-07
226094_at	PIK3C2A	phosphoinositide-3-kinase, class 2, alpha polypeptide	5286	-2.33011	-7.58324	2.12e-07	1.13e-06
233748_x_at	PRKAG2	protein kinase, AMP-activated, gamma 2 non-catalytic subunit	51422	-2.32998	-13.9961	5.11e-12	8.68e-11
222209_s_at	TMEM135	transmembrane protein 135	65084	-2.32942	-5.12449	4.67e-05	0.000154774
225260_s_at	MRPL32	mitochondrial ribosomal protein L32	64983	-2.32896	-16.058	3.75e-13	8.75e-12
209853_s_at	PSME3	proteasome (prosome, macropain) activator subunit 3 (PA28 gamma; Ki)	10197	-2.32861	-11.6631	1.48e-10	1.72e-09
210764_s_at	CYR61	cysteine-rich, angiogenic inducer, 61	3491	-2.32854	-8.503	3.44e-08	2.21e-07
218578_at	CDC73	cell division cycle 73, Paf1/RNA polymerase II complex component, homolog (S. cerevisiae)	79577	-2.32816	-9.85428	2.9e-09	2.42e-08
1555573_at	C10orf93	chromosome 10 open reading frame 93	255352	-2.32739	-13.4293	1.11e-11	1.73e-10
209865_at	SLC35A3	solute carrier family 35 (UDP-N-acetylglucosamine (UDP-GlcNAc) transporter), member A3	23443	-2.32656	-9.50422	5.39e-09	4.2e-08
233819_s_at	RNF160	ring finger protein 160	26046	-2.32633	-7.50491	2.48e-07	1.31e-06
223038_s_at	FAM60A	family with sequence similarity 60, member A	58516	-2.32618	-3.42875	0.00256267	0.00599595
218196_at	OSTM1	osteopetrosis associated transmembrane protein 1	28962	-2.32414	-6.35877	2.83e-06	1.2e-05
239138_at	---	---	---	-2.32332	-6.29315	3.28e-06	1.37e-05
200886_s_at	PGAM1	phosphoglycerate mutase 1 (brain)	5223	-2.32315	-16.7171	1.73e-13	4.44e-12
210416_s_at	CHEK2	CHK2 checkpoint homolog (S. pombe)	11200	-2.32265	-13.6063	8.68e-12	1.39e-10
225253_s_at	METTL2A /// METTL2B	methyltransferase like 2A /// methyltransferase like 2B	339175 /// 55798	-2.32249	-13.4965	1.01e-11	1.59e-10
213012_at	NEDD4	neural precursor cell expressed, developmentally down-regulated 4	4734	-2.3224	-7.55105	2.26e-07	1.2e-06
227522_at	CMBL	carboxymethylenebutenolidase homolog (Pseudomonas)	134147	-2.3218	-15.1386	1.16e-12	2.39e-11
208955_at	DUT	deoxyuridine triphosphatase	1854	-2.32084	-9.41987	6.27e-09	4.8e-08
234970_at	TC2N	tandem C2 domains, nuclear	123036	-2.32046	-13.2226	1.48e-11	2.23e-10
201215_at	PLS3	plastin 3 (T isoform)	5358	-2.32012	-13.756	7.07e-12	1.16e-10
202956_at	ARFGEF1	ADP-ribosylation factor guanine nucleotide-exchange factor 1(brefeldin A-inhibited)	10565	-2.31903	-7.74289	1.53e-07	8.45e-07
235764_at	---	---	---	-2.31788	-5.81635	9.51e-06	3.62e-05
214193_s_at	C1orf107	chromosome 1 open reading frame 107	27042	-2.31764	-7.95555	1e-07	5.75e-07
210547_x_at	ICA1	islet cell autoantigen 1, 69kDa	3382	-2.31724	-13.9801	5.22e-12	8.83e-11
214636_at	CALCB	calcitonin-related polypeptide beta	797	-2.31723	-10.9785	4.38e-10	4.51e-09
205526_s_at	KATNA1	katanin p60 (ATPase-containing) subunit A 1	11104	-2.31671	-13.0915	1.78e-11	2.63e-10
227374_at	EARS2	glutamyl-tRNA synthetase 2, mitochondrial (putative)	124454	-2.31637	-11.7659	1.26e-10	1.49e-09
204679_at	KCNK1	potassium channel, subfamily K, member 1	3775	-2.31596	-13.3127	1.3e-11	1.99e-10
209191_at	TUBB6	tubulin, beta 6	84617	-2.31559	-18.6891	1.97e-14	6.69e-13
229174_at	C3orf38	chromosome 3 open reading frame 38	285237	-2.31382	-6.56941	1.79e-06	7.86e-06
209615_s_at	PAK1	p21 protein (Cdc42/Rac)-activated kinase 1	5058	-2.31357	-9.48614	5.57e-09	4.32e-08
209969_s_at	STAT1	signal transducer and activator of transcription 1, 91kDa	6772	-2.31314	-7.52396	2.39e-07	1.26e-06
202906_s_at	NBN	nibrin	4683	-2.31285	-7.22495	4.43e-07	2.21e-06
232805_at	---	---	---	-2.31239	-8.71983	2.28e-08	1.53e-07
222111_at	---	---	---	-2.31233	-6.09549	5.08e-06	2.05e-05
206707_x_at	FAM65B	family with sequence similarity 65, member B	9750	-2.31162	-13.1557	1.63e-11	2.43e-10
206481_s_at	LDB2	LIM domain binding 2	9079	-2.31054	-7.25885	4.13e-07	2.07e-06
228293_at	DEPDC7	DEP domain containing 7	91614	-2.3077	-7.85573	1.22e-07	6.89e-07
1554689_a_at	NLGN4X	neuroligin 4, X-linked	57502	-2.30749	-11.5424	1.78e-10	2.03e-09
217785_s_at	YKT6	YKT6 v-SNARE homolog (S. cerevisiae)	10652	-2.30712	-8.03775	8.5e-08	4.96e-07
212411_at	IMP4	IMP4, U3 small nucleolar ribonucleoprotein, homolog (yeast)	92856	-2.30627	-12.0474	8.21e-11	1.02e-09
225583_at	UXS1	UDP-glucuronate decarboxylase 1	80146	-2.30624	-13.3873	1.18e-11	1.82e-10
225593_at	LSM10	LSM10, U7 small nuclear RNA associated	84967	-2.30554	-8.35899	4.54e-08	2.83e-07
224933_s_at	JMJD1C	jumonji domain containing 1C	221037	-2.30481	-4.57617	0.00016959	0.000502714
214442_s_at	PIAS2	protein inhibitor of activated STAT, 2	9063	-2.30458	-10.6709	7.24e-10	7.06e-09
201435_s_at	EIF4E	eukaryotic translation initiation factor 4E	1977	-2.3044	-17.3561	8.34e-14	2.33e-12
209421_at	MSH2	mutS homolog 2, colon cancer, nonpolyposis type 1 (E. coli)	4436	-2.30332	-5.17262	4.18e-05	0.000139834
202822_at	LPP	LIM domain containing preferred translocation partner in lipoma	4026	-2.30292	-10.9626	4.49e-10	4.62e-09
227295_at	IKIP	IKK interacting protein	121457	-2.30286	-9.32511	7.44e-09	5.61e-08
209479_at	CCDC28A	coiled-coil domain containing 28A	25901	-2.30182	-8.66966	2.5e-08	1.67e-07
209536_s_at	EHD4	EH-domain containing 4	30844	-2.30171	-14.8637	1.64e-12	3.22e-11
1568678_s_at	FGFR1OP	FGFR1 oncogene partner	11116	-2.30144	-13.033	1.94e-11	2.83e-10
222750_s_at	SRD5A3	steroid 5 alpha-reductase 3	79644	-2.30074	-13.4476	1.08e-11	1.69e-10
228204_at	PSMB4	Proteasome (prosome, macropain) subunit, beta type, 4	5692	-2.30068	-5.18935	4.02e-05	0.000134986
226643_s_at	NUDCD2	NudC domain containing 2	134492	-2.30058	-12.0156	8.62e-11	1.06e-09
202512_s_at	ATG5	ATG5 autophagy related 5 homolog (S. cerevisiae)	9474	-2.30052	-5.722	1.18e-05	4.4e-05
203990_s_at	KDM6A	lysine (K)-specific demethylase 6A	7403	-2.29991	-11.5948	1.65e-10	1.89e-09
226338_at	TMEM55A	transmembrane protein 55A	55529	-2.29944	-8.55827	3.09e-08	2.01e-07
1556009_at	PEX13	peroxisomal biogenesis factor 13	5194	-2.29941	-6.54794	1.87e-06	8.21e-06
200625_s_at	CAP1	CAP, adenylate cyclase-associated protein 1 (yeast)	10487	-2.2991	-10.212	1.57e-09	1.4e-08
230556_at	IMMP1L	IMP1 inner mitochondrial membrane peptidase-like (S. cerevisiae)	196294	-2.29776	-6.51066	2.03e-06	8.85e-06
235202_x_at	IKIP	IKK interacting protein	121457	-2.29758	-10.0405	2.1e-09	1.81e-08
218598_at	RINT1	RAD50 interactor 1	60561	-2.29755	-5.66454	1.34e-05	4.97e-05
200054_at	ZNF259	zinc finger protein 259	8882	-2.29719	-10.3361	1.27e-09	1.16e-08
208290_s_at	EIF5	eukaryotic translation initiation factor 5	1983	-2.29702	-7.72853	1.58e-07	8.67e-07
208934_s_at	LGALS8	lectin, galactoside-binding, soluble, 8	3964	-2.29685	-11.7917	1.21e-10	1.44e-09
218408_at	TIMM10	translocase of inner mitochondrial membrane 10 homolog (yeast)	26519	-2.29484	-12.1169	7.4e-11	9.26e-10
202747_s_at	ITM2A	integral membrane protein 2A	9452	-2.29409	-10.136	1.78e-09	1.57e-08
235180_at	STYX	serine/threonine/tyrosine interacting protein	6815	-2.29372	-9.41793	6.29e-09	4.82e-08
225481_at	FRMD6	FERM domain containing 6	122786	-2.29361	-6.27165	3.44e-06	1.43e-05
210028_s_at	ORC3L	origin recognition complex, subunit 3-like (yeast)	23595	-2.29356	-10.8294	5.58e-10	5.61e-09
203011_at	IMPA1	inositol(myo)-1(or 4)-monophosphatase 1	3612	-2.29348	-6.81394	1.06e-06	4.87e-06
201259_s_at	SYPL1	synaptophysin-like 1	6856	-2.29342	-9.00566	1.33e-08	9.53e-08
212902_at	SEC24A	SEC24 family, member A (S. cerevisiae)	10802	-2.29326	-6.14916	4.51e-06	1.84e-05
217892_s_at	LIMA1	LIM domain and actin binding 1	51474	-2.29311	-7.57779	2.14e-07	1.14e-06
224657_at	ERRFI1	ERBB receptor feedback inhibitor 1	54206	-2.29234	-10.2588	1.45e-09	1.31e-08
217887_s_at	EPS15	epidermal growth factor receptor pathway substrate 15	2060	-2.2907	-6.69553	1.36e-06	6.15e-06
243372_at	HSPD1 /// HSPD1P4	heat shock 60kDa protein 1 (chaperonin) /// heat shock 60kDa protein 1 (chaperonin) pseudogene 4	3329 /// 644745	-2.29054	-6.59413	1.7e-06	7.49e-06
1558080_s_at	DNAJC3	DnaJ (Hsp40) homolog, subfamily C, member 3	5611	-2.28949	-7.53633	2.33e-07	1.23e-06
212686_at	PPM1H	protein phosphatase 1H (PP2C domain containing)	57460	-2.28915	-8.96578	1.44e-08	1.02e-07
226517_at	BCAT1	branched chain aminotransferase 1, cytosolic	586	-2.28868	-10.2575	1.45e-09	1.31e-08
212158_at	SDC2	syndecan 2	6383	-2.28788	-9.28371	8.02e-09	6e-08
223272_s_at	C1orf57	chromosome 1 open reading frame 57	84284	-2.28707	-15.0306	1.33e-12	2.7e-11
216607_s_at	CYP51A1	cytochrome P450, family 51, subfamily A, polypeptide 1	1595	-2.28623	-6.59488	1.69e-06	7.48e-06
235134_at	---	---	---	-2.28558	-7.48697	2.58e-07	1.35e-06
211725_s_at	BID	BH3 interacting domain death agonist	637	-2.28417	-10.4029	1.13e-09	1.05e-08
212219_at	PSME4	proteasome (prosome, macropain) activator subunit 4	23198	-2.28241	-9.22428	8.93e-09	6.61e-08
212434_at	GRPEL1	GrpE-like 1, mitochondrial (E. coli)	80273	-2.28149	-12.0187	8.58e-11	1.06e-09
235451_at	SMAD5	SMAD family member 5	4090	-2.2806	-5.12612	4.65e-05	0.000154214
205187_at	SMAD5	SMAD family member 5	4090	-2.27933	-3.31871	0.0033123	0.00755608
208622_s_at	EZR	ezrin	7430	-2.27829	-10.8116	5.75e-10	5.75e-09
222815_at	RLIM	ring finger protein, LIM domain interacting	51132	-2.2776	-6.91435	8.52e-07	4.01e-06
1554450_s_at	MIER3	mesoderm induction early response 1, family member 3	166968	-2.27742	-3.10469	0.00543064	0.011808
223414_s_at	LYAR	Ly1 antibody reactive homolog (mouse)	55646	-2.27735	-15.3925	8.43e-13	1.81e-11
231879_at	COL12A1	collagen, type XII, alpha 1	1303	-2.27624	-8.51096	3.39e-08	2.18e-07
200609_s_at	WDR1	WD repeat domain 1	9948	-2.2729	-16.9837	1.27e-13	3.38e-12
203148_s_at	TRIM14	tripartite motif-containing 14	9830	-2.27276	-9.58917	4.63e-09	3.66e-08
220688_s_at	MRTO4	mRNA turnover 4 homolog (S. cerevisiae)	51154	-2.27273	-5.69526	1.25e-05	4.65e-05
218036_x_at	NMD3	NMD3 homolog (S. cerevisiae)	51068	-2.27141	-3.02403	0.0065305	0.0139508
201171_at	ATP6V0E1	ATPase, H+ transporting, lysosomal 9kDa, V0 subunit e1	8992	-2.27114	-10.1481	1.75e-09	1.54e-08
236824_at	TMEM132B	transmembrane protein 132B	114795	-2.27092	-8.5512	3.14e-08	2.04e-07
218854_at	DSE	dermatan sulfate epimerase	29940	-2.27074	-8.43719	3.9e-08	2.48e-07
228853_at	STYX	serine/threonine/tyrosine interacting protein	6815	-2.27022	-10.759	6.26e-10	6.2e-09
200027_at	NARS	asparaginyl-tRNA synthetase	4677	-2.26976	-7.98557	9.43e-08	5.45e-07
203647_s_at	FDX1	ferredoxin 1	2230	-2.26973	-11.0568	3.86e-10	4.04e-09
218361_at	GOLPH3L	golgi phosphoprotein 3-like	55204	-2.26951	-10.5743	8.5e-10	8.15e-09
230122_at	MLLT10	myeloid/lymphoid or mixed-lineage leukemia (trithorax homolog, Drosophila); translocated to, 10	8028	-2.26951	-11.6996	1.4e-10	1.64e-09
220682_s_at	---	---	---	-2.26926	-7.01616	6.87e-07	3.3e-06
1556128_a_at	RASGRF2	Ras protein-specific guanine nucleotide-releasing factor 2	5924	-2.26909	-11.3552	2.4e-10	2.64e-09
210466_s_at	SERBP1	SERPINE1 mRNA binding protein 1	26135	-2.26852	-12.4024	4.83e-11	6.35e-10
214244_s_at	ATP6V0E1	ATPase, H+ transporting, lysosomal 9kDa, V0 subunit e1	8992	-2.26822	-8.03431	8.56e-08	4.99e-07
226936_at	C6orf173	chromosome 6 open reading frame 173	387103	-2.26639	-10.7969	5.89e-10	5.86e-09
1564053_a_at	YTHDF3	YTH domain family, member 3	253943	-2.26637	-6.13668	4.63e-06	1.88e-05
216672_s_at	MYT1L	myelin transcription factor 1-like	23040	-2.26629	-8.73423	2.22e-08	1.5e-07
222502_s_at	UFM1	ubiquitin-fold modifier 1	51569	-2.26503	-9.02442	1.29e-08	9.23e-08
218497_s_at	RNASEH1	ribonuclease H1	246243	-2.26497	-12.7558	2.88e-11	4.02e-10
218546_at	C1orf115	chromosome 1 open reading frame 115	79762	-2.26483	-9.94152	2.49e-09	2.11e-08
204479_at	OSTF1	osteoclast stimulating factor 1	26578	-2.26367	-10.1571	1.72e-09	1.52e-08
219295_s_at	PCOLCE2	procollagen C-endopeptidase enhancer 2	26577	-2.26283	-8.9182	1.57e-08	1.1e-07
218595_s_at	HEATR1	HEAT repeat containing 1	55127	-2.26282	-8.48966	3.53e-08	2.26e-07
230951_at	---	---	---	-2.26219	-11.3044	2.6e-10	2.83e-09
213923_at	RAP2B	RAP2B, member of RAS oncogene family	5912	-2.26135	-12.8726	2.43e-11	3.46e-10
243745_at	---	---	---	-2.26107	-8.06979	7.98e-08	4.68e-07
203077_s_at	SMAD2	SMAD family member 2	4087	-2.26099	-8.06694	8.03e-08	4.7e-07
241353_s_at	LOC100129105	similar to hCG1821214	100129105	-2.26098	-14.5487	2.46e-12	4.57e-11
221580_s_at	TAF1D	TATA box binding protein (TBP)-associated factor, RNA polymerase I, D, 41kDa	79101	-2.26089	-16.7825	1.6e-13	4.15e-12
229509_at	MFSD8	major facilitator superfamily domain containing 8	256471	-2.26072	-9.43614	6.09e-09	4.68e-08
220241_at	TMCO3	transmembrane and coiled-coil domains 3	55002	-2.26031	-8.90469	1.61e-08	1.13e-07
214700_x_at	RIF1	RAP1 interacting factor homolog (yeast)	55183	-2.25978	-5.1676	4.22e-05	0.000141302
203225_s_at	RFK	riboflavin kinase	55312	-2.25962	-12.1951	6.58e-11	8.36e-10
226241_s_at	MRPL52	mitochondrial ribosomal protein L52	122704	-2.25949	-7.965	9.82e-08	5.66e-07
230641_at	---	---	---	-2.25931	-10.6344	7.69e-10	7.45e-09
201925_s_at	CD55	CD55 molecule, decay accelerating factor for complement (Cromer blood group)	1604	-2.2591	-6.55059	1.86e-06	8.16e-06
202659_at	PSMB10	proteasome (prosome, macropain) subunit, beta type, 10	5699	-2.25884	-10.7388	6.47e-10	6.39e-09
208911_s_at	PDHB	pyruvate dehydrogenase (lipoamide) beta	5162	-2.25854	-13.6757	7.89e-12	1.28e-10
219544_at	C13orf34	chromosome 13 open reading frame 34	79866	-2.25853	-8.51463	3.36e-08	2.17e-07
203418_at	CCNA2	cyclin A2	890	-2.25807	-7.72564	1.59e-07	8.71e-07
222892_s_at	TMEM40	transmembrane protein 40	55287	-2.25742	-12.8486	2.52e-11	3.57e-10
201016_at	EIF1AX	eukaryotic translation initiation factor 1A, X-linked	1964	-2.25708	-12.9099	2.31e-11	3.3e-10
218535_s_at	RIOK2	RIO kinase 2 (yeast)	55781	-2.25649	-10.8067	5.79e-10	5.79e-09
208864_s_at	TXN	thioredoxin	7295	-2.25611	-7.41566	2.98e-07	1.54e-06
209210_s_at	FERMT2	fermitin family homolog 2 (Drosophila)	10979	-2.25598	-9.35045	7.1e-09	5.37e-08
214214_s_at	C1QBP	complement component 1, q subcomponent binding protein	708	-2.25509	-18.4592	2.51e-14	8.26e-13
210253_at	HTATIP2	HIV-1 Tat interactive protein 2, 30kDa	10553	-2.25505	-8.99556	1.36e-08	9.68e-08
205739_x_at	ZNF107	zinc finger protein 107	51427	-2.255	-6.74356	1.23e-06	5.58e-06
230009_at	FAM118B	family with sequence similarity 118, member B	79607	-2.25275	-8.38708	4.3e-08	2.69e-07
206770_s_at	SLC35A3	solute carrier family 35 (UDP-N-acetylglucosamine (UDP-GlcNAc) transporter), member A3	23443	-2.25187	-7.13571	5.34e-07	2.62e-06
218095_s_at	TMEM165	transmembrane protein 165	55858	-2.25168	-9.14521	1.03e-08	7.53e-08
203486_s_at	ARMC8	armadillo repeat containing 8	25852	-2.2514	-12.3657	5.1e-11	6.66e-10
203438_at	STC2	stanniocalcin 2	8614	-2.25108	-11.9969	8.87e-11	1.09e-09
208680_at	PRDX1	peroxiredoxin 1	5052	-2.2509	-8.99671	1.36e-08	9.67e-08
206233_at	B4GALT6	UDP-Gal:betaGlcNAc beta 1,4- galactosyltransferase, polypeptide 6	9331	-2.25068	-3.34822	0.00309246	0.0070958
225105_at	C12orf75	chromosome 12 open reading frame 75	387882	-2.25052	-17.9624	4.28e-14	1.32e-12
228398_at	SENP8	SUMO/sentrin specific peptidase family member 8	123228	-2.24952	-10.4073	1.12e-09	1.04e-08
206302_s_at	NUDT4 /// NUDT4P1	nudix (nucleoside diphosphate linked moiety X)-type motif 4 /// nudix (nucleoside diphosphate linked moiety X)-type motif 4 pseudogene 1	11163 /// 440672	-2.24855	-7.51722	2.42e-07	1.28e-06
216574_s_at	hCG_2024410 /// RPE	rcRPE /// ribulose-5-phosphate-3-epimerase	6120 /// 729020	-2.24821	-11.115	3.51e-10	3.72e-09
221763_at	JMJD1C	jumonji domain containing 1C	221037	-2.24697	-7.2369	4.32e-07	2.16e-06
209476_at	TMX1	thioredoxin-related transmembrane protein 1	81542	-2.24631	-7.20717	4.6e-07	2.28e-06
214830_at	SLC38A6	solute carrier family 38, member 6	145389	-2.24543	-8.82506	1.87e-08	1.29e-07
222700_at	ATL2	atlastin GTPase 2	64225	-2.24538	-6.6157	1.62e-06	7.18e-06
218853_s_at	MOSPD1	motile sperm domain containing 1	56180	-2.24514	-8.29736	5.11e-08	3.15e-07
226782_at	SLC25A30	solute carrier family 25, member 30	253512	-2.24493	-9.69745	3.82e-09	3.09e-08
218826_at	SLC35F2	solute carrier family 35, member F2	54733	-2.24474	-9.32318	7.46e-09	5.62e-08
226272_at	RCAN3	RCAN family member 3	11123	-2.24458	-8.10585	7.43e-08	4.4e-07
203869_at	USP46	ubiquitin specific peptidase 46	64854	-2.24313	-5.6016	1.55e-05	5.67e-05
205761_s_at	DUS4L	dihydrouridine synthase 4-like (S. cerevisiae)	11062	-2.24289	-8.48836	3.54e-08	2.27e-07
218970_s_at	CUTC	cutC copper transporter homolog (E. coli)	51076	-2.24278	-13.3083	1.31e-11	2e-10
204603_at	EXO1	exonuclease 1	9156	-2.2414	-7.43811	2.85e-07	1.48e-06
217772_s_at	MTCH2	mitochondrial carrier homolog 2 (C. elegans)	23788	-2.24062	-19.2316	1.12e-14	4.05e-13
224632_at	GPATCH4	G patch domain containing 4	54865	-2.24044	-4.26528	0.000354498	0.000984245
209892_at	FUT4	fucosyltransferase 4 (alpha (1,3) fucosyltransferase, myeloid-specific)	2526	-2.24026	-8.34578	4.65e-08	2.89e-07
231234_at	CTSC	cathepsin C	1075	-2.2397	-12.8467	2.53e-11	3.58e-10
231713_s_at	ELP2	elongation protein 2 homolog (S. cerevisiae)	55250	-2.23919	-7.44329	2.82e-07	1.46e-06
1557411_s_at	SLC25A43	solute carrier family 25, member 43	203427	-2.23857	-7.73563	1.55e-07	8.56e-07
227045_at	ZNF614	zinc finger protein 614	80110	-2.23834	-6.87426	9.28e-07	4.33e-06
203680_at	PRKAR2B	protein kinase, cAMP-dependent, regulatory, type II, beta	5577	-2.23833	-5.51196	1.9e-05	6.83e-05
224446_at	LLPH	LLP homolog, long-term synaptic facilitation (Aplysia)	84298	-2.23827	-11.4183	2.17e-10	2.41e-09
225800_at	JAZF1	JAZF zinc finger 1	221895	-2.23686	-14.1031	4.43e-12	7.69e-11
203428_s_at	ASF1A	ASF1 anti-silencing function 1 homolog A (S. cerevisiae)	25842	-2.23686	-12.5697	3.78e-11	5.13e-10
220011_at	C1orf135	chromosome 1 open reading frame 135	79000	-2.23673	-11.1251	3.46e-10	3.66e-09
233655_s_at	HAUS6	HAUS augmin-like complex, subunit 6	54801	-2.23593	-3.40853	0.00268672	0.00624826
205659_at	HDAC9	histone deacetylase 9	9734	-2.23574	-8.14569	6.87e-08	4.1e-07
201608_s_at	PWP1	PWP1 homolog (S. cerevisiae)	11137	-2.23556	-11.5594	1.74e-10	1.99e-09
231500_s_at	BOLA2	BolA homolog 2 (E. coli)	552900	-2.23555	-10.2058	1.58e-09	1.41e-08
201854_s_at	ATMIN	ATM interactor	23300	-2.23511	-9.4064	6.42e-09	4.91e-08
218967_s_at	PTER	phosphotriesterase related	9317	-2.23488	-8.61499	2.78e-08	1.83e-07
235466_s_at	DISP1	Dispatched homolog 1 (Drosophila)	84976	-2.23311	-10.229	1.52e-09	1.37e-08
229711_s_at	MDM2	Mdm2 p53 binding protein homolog (mouse)	4193	-2.23137	-15.7054	5.74e-13	1.29e-11
1562289_at	---	---	---	-2.23126	-9.45091	5.93e-09	4.57e-08
212461_at	AZIN1	antizyme inhibitor 1	51582	-2.22976	-11.1494	3.32e-10	3.54e-09
215165_x_at	UMPS	uridine monophosphate synthetase	7372	-2.22957	-14.9058	1.55e-12	3.09e-11
203211_s_at	MTMR2	myotubularin related protein 2	8898	-2.22945	-8.0149	8.89e-08	5.17e-07
239891_x_at	RAB12	RAB12, member RAS oncogene family	201475	-2.22812	-5.57797	1.64e-05	5.95e-05
213798_s_at	CAP1	CAP, adenylate cyclase-associated protein 1 (yeast)	10487	-2.22809	-7.5488	2.27e-07	1.2e-06
218676_s_at	PCTP	phosphatidylcholine transfer protein	58488	-2.22808	-12.3303	5.37e-11	6.99e-10
216684_s_at	SS18	synovial sarcoma translocation, chromosome 18	6760	-2.2276	-9.89616	2.7e-09	2.26e-08
214106_s_at	GMDS	GDP-mannose 4,6-dehydratase	2762	-2.22722	-13.9251	5.62e-12	9.43e-11
218796_at	FERMT1	fermitin family homolog 1 (Drosophila)	55612	-2.22642	-10.0051	2.23e-09	1.91e-08
209393_s_at	EIF4E2	eukaryotic translation initiation factor 4E family member 2	9470	-2.22541	-11.679	1.44e-10	1.69e-09
225817_at	CGNL1	cingulin-like 1	84952	-2.22499	-9.2232	8.95e-09	6.62e-08
218346_s_at	SESN1	sestrin 1	27244	-2.2249	-7.96081	9.9e-08	5.7e-07
208893_s_at	DUSP6	dual specificity phosphatase 6	1848	-2.2228	-12.6048	3.59e-11	4.9e-10
219177_at	BXDC2	brix domain containing 2	55299	-2.22271	-12.4198	4.71e-11	6.21e-10
221514_at	UTP14A	UTP14, U3 small nucleolar ribonucleoprotein, homolog A (yeast)	10813	-2.22251	-10.7466	6.39e-10	6.31e-09
204127_at	RFC3	replication factor C (activator 1) 3, 38kDa	5983	-2.22244	-8.76742	2.08e-08	1.42e-07
201688_s_at	TPD52	tumor protein D52	7163	-2.22238	-10.4813	9.93e-10	9.34e-09
214880_x_at	CALD1	caldesmon 1	800	-2.22236	-6.33154	3.01e-06	1.27e-05
234672_s_at	TMEM48	transmembrane protein 48	55706	-2.2221	-7.64599	1.86e-07	1.01e-06
225607_at	CCDC43	coiled-coil domain containing 43	124808	-2.22108	-11.3886	2.27e-10	2.52e-09
203218_at	MAPK9	mitogen-activated protein kinase 9	5601	-2.22037	-7.68808	1.71e-07	9.32e-07
210007_s_at	GPD2	glycerol-3-phosphate dehydrogenase 2 (mitochondrial)	2820	-2.2203	-8.41578	4.07e-08	2.57e-07
200872_at	S100A10	S100 calcium binding protein A10	6281	-2.2199	-8.81637	1.9e-08	1.3e-07
211955_at	IPO5	importin 5	3843	-2.21981	-8.21401	6.01e-08	3.64e-07
203594_at	RTCD1	RNA terminal phosphate cyclase domain 1	8634	-2.21968	-16.7066	1.75e-13	4.48e-12
200096_s_at	ATP6V0E1	ATPase, H+ transporting, lysosomal 9kDa, V0 subunit e1	8992	-2.2194	-9.55776	4.9e-09	3.85e-08
200961_at	SEPHS2	selenophosphate synthetase 2	22928	-2.219	-11.3968	2.24e-10	2.49e-09
202362_at	RAP1A	RAP1A, member of RAS oncogene family	5906	-2.21897	-11.6547	1.5e-10	1.74e-09
228190_at	ATG4C /// CTR9	ATG4 autophagy related 4 homolog C (S. cerevisiae) /// Ctr9, Paf1/RNA polymerase II complex component, homolog (S. cerevisiae)	84938 /// 9646	-2.21832	-6.73333	1.26e-06	5.7e-06
203200_s_at	MTRR	5-methyltetrahydrofolate-homocysteine methyltransferase reductase	4552	-2.21815	-6.40238	2.58e-06	1.1e-05
1555888_at	UBR5	Ubiquitin protein ligase E3 component n-recognin 5	51366	-2.21779	-9.39914	6.51e-09	4.96e-08
203124_s_at	SLC11A2	solute carrier family 11 (proton-coupled divalent metal ion transporters), member 2	4891	-2.21709	-8.79524	1.98e-08	1.35e-07
212565_at	STK38L	serine/threonine kinase 38 like	23012	-2.21668	-9.15408	1.02e-08	7.42e-08
238443_at	---	---	---	-2.21659	-9.76869	3.37e-09	2.76e-08
218295_s_at	NUP50	nucleoporin 50kDa	10762	-2.21619	-10.0187	2.18e-09	1.88e-08
208708_x_at	EIF5	eukaryotic translation initiation factor 5	1983	-2.21589	-7.80633	1.35e-07	7.52e-07
209631_s_at	GPR37	G protein-coupled receptor 37 (endothelin receptor type B-like)	2861	-2.21549	-9.45217	5.91e-09	4.56e-08
208726_s_at	EIF2S2	eukaryotic translation initiation factor 2, subunit 2 beta, 38kDa	8894	-2.21548	-17.4002	7.94e-14	2.24e-12
204565_at	ACOT13	acyl-CoA thioesterase 13	55856	-2.21387	-7.88195	1.16e-07	6.57e-07
209913_x_at	KIAA0415	KIAA0415	9907	-2.2129	-9.09003	1.14e-08	8.26e-08
241709_s_at	DOCK1	dedicator of cytokinesis 1	1793	-2.21216	-12.5238	4.04e-11	5.45e-10
227306_at	---	---	---	-2.21187	-6.5642	1.81e-06	7.95e-06
225994_at	CPSF2	cleavage and polyadenylation specific factor 2, 100kDa	53981	-2.21186	-7.44991	2.78e-07	1.45e-06
213518_at	PRKCI	protein kinase C, iota	5584	-2.21138	-8.11305	7.33e-08	4.34e-07
209529_at	PPAP2C	phosphatidic acid phosphatase type 2C	8612	-2.21055	-6.91278	8.55e-07	4.02e-06
202537_s_at	CHMP2B	chromatin modifying protein 2B	25978	-2.2105	-10.124	1.82e-09	1.59e-08
203201_at	PMM2	phosphomannomutase 2	5373	-2.21009	-11.7513	1.29e-10	1.52e-09
241879_at	---	---	---	-2.20978	-8.5601	3.08e-08	2.01e-07
1553179_at	ADAMTS19	ADAM metallopeptidase with thrombospondin type 1 motif, 19	171019	-2.20968	-7.86352	1.2e-07	6.79e-07
206632_s_at	APOBEC3B	apolipoprotein B mRNA editing enzyme, catalytic polypeptide-like 3B	9582	-2.20923	-12.4541	4.47e-11	5.96e-10
1563796_s_at	EARS2	glutamyl-tRNA synthetase 2, mitochondrial (putative)	124454	-2.20922	-11.7219	1.35e-10	1.59e-09
223586_at	ARNTL2	aryl hydrocarbon receptor nuclear translocator-like 2	56938	-2.20806	-10.4207	1.1e-09	1.02e-08
213082_s_at	SLC35D2	solute carrier family 35, member D2	11046	-2.2071	-9.95965	2.42e-09	2.06e-08
202129_s_at	RIOK3	RIO kinase 3 (yeast)	8780	-2.20654	-5.61829	1.49e-05	5.47e-05
212800_at	STX6	syntaxin 6	10228	-2.20632	-7.36226	3.33e-07	1.7e-06
219622_at	RAB20	RAB20, member RAS oncogene family	55647	-2.20383	-16.6415	1.88e-13	4.77e-12
227534_at	C9orf21	chromosome 9 open reading frame 21	195827	-2.20304	-7.49382	2.54e-07	1.33e-06
212460_at	C14orf147	chromosome 14 open reading frame 147	171546	-2.20265	-14.6957	2.04e-12	3.89e-11
204909_at	DDX6	DEAD (Asp-Glu-Ala-Asp) box polypeptide 6	1656	-2.20201	-10.288	1.38e-09	1.25e-08
226537_at	HINT3	histidine triad nucleotide binding protein 3	135114	-2.20174	-8.7675	2.08e-08	1.42e-07
232976_at	SNORD116@	small nucleolar RNA, C/D box 116 cluster	692236	-2.20156	-10.2486	1.47e-09	1.32e-08
202347_s_at	UBE2K	ubiquitin-conjugating enzyme E2K (UBC1 homolog, yeast)	3093	-2.20135	-13.341	1.25e-11	1.92e-10
201988_s_at	CREBL2	cAMP responsive element binding protein-like 2	1389	-2.20096	-5.88693	8.11e-06	3.13e-05
200868_s_at	RNF114	ring finger protein 114	55905	-2.20087	-11.7038	1.39e-10	1.63e-09
242057_at	---	---	---	-2.20039	-6.90393	8.71e-07	4.09e-06
211212_s_at	ORC5L	origin recognition complex, subunit 5-like (yeast)	5001	-2.20035	-7.67035	1.77e-07	9.61e-07
223292_s_at	MRPS15	mitochondrial ribosomal protein S15	64960	-2.19987	-8.77299	2.06e-08	1.4e-07
1554464_a_at	CRTAP	cartilage associated protein	10491	-2.19978	-10.2258	1.53e-09	1.37e-08
211971_s_at	LRPPRC	leucine-rich PPR-motif containing	10128	-2.1995	-6.68373	1.4e-06	6.29e-06
242844_at	PGGT1B	Protein geranylgeranyltransferase type I, beta subunit	5229	-2.19946	-7.43811	2.85e-07	1.48e-06
222981_s_at	RAB10	RAB10, member RAS oncogene family	10890	-2.19944	-10.8925	5.03e-10	5.11e-09
201927_s_at	PKP4	plakophilin 4	8502	-2.19927	-3.25321	0.00385608	0.00868521
213280_at	GARNL4	GTPase activating Rap/RanGAP domain-like 4	23108	-2.19818	-8.79788	1.97e-08	1.35e-07
214056_at	MCL1	Myeloid cell leukemia sequence 1 (BCL2-related)	4170	-2.19695	-9.77981	3.31e-09	2.71e-08
1553810_a_at	KIAA1524	KIAA1524	57650	-2.19627	-8.54133	3.2e-08	2.07e-07
201437_s_at	EIF4E	eukaryotic translation initiation factor 4E	1977	-2.1957	-10.3486	1.24e-09	1.14e-08
229271_x_at	COL11A1	collagen, type XI, alpha 1	1301	-2.19534	-6.30099	3.22e-06	1.35e-05
226089_at	RABL3	RAB, member of RAS oncogene family-like 3	285282	-2.1945	-9.71308	3.72e-09	3.02e-08
225114_at	AGPS	alkylglycerone phosphate synthase	8540	-2.19449	-6.75458	1.2e-06	5.47e-06
210174_at	NR5A2	nuclear receptor subfamily 5, group A, member 2	2494	-2.19397	-8.31356	4.95e-08	3.06e-07
219539_at	GEMIN6	gem (nuclear organelle) associated protein 6	79833	-2.19271	-8.98373	1.39e-08	9.89e-08
1555716_a_at	CXADR	coxsackie virus and adenovirus receptor	1525	-2.19143	-7.69118	1.7e-07	9.27e-07
204969_s_at	RDX	radixin	5962	-2.19127	-3.89919	0.000845459	0.00218745
212638_s_at	WWP1	WW domain containing E3 ubiquitin protein ligase 1	11059	-2.19117	-7.07191	6.11e-07	2.97e-06
203123_s_at	SLC11A2	solute carrier family 11 (proton-coupled divalent metal ion transporters), member 2	4891	-2.19093	-10.2711	1.42e-09	1.28e-08
1552625_a_at	TRNT1	tRNA nucleotidyl transferase, CCA-adding, 1	51095	-2.19019	-7.09924	5.76e-07	2.81e-06
219599_at	EIF4B	eukaryotic translation initiation factor 4B	1975	-2.18948	-5.9959	6.35e-06	2.51e-05
200727_s_at	ACTR2	ARP2 actin-related protein 2 homolog (yeast)	10097	-2.18914	-6.74576	1.22e-06	5.56e-06
230769_at	DENND2C	DENN/MADD domain containing 2C	163259	-2.18878	-8.15531	6.75e-08	4.03e-07
225853_at	GNPNAT1	glucosamine-phosphate N-acetyltransferase 1	64841	-2.18681	-11.3599	2.38e-10	2.62e-09
207654_x_at	DR1	down-regulator of transcription 1, TBP-binding (negative cofactor 2)	1810	-2.18626	-6.98594	7.32e-07	3.49e-06
219650_at	ERCC6L	excision repair cross-complementing rodent repair deficiency, complementation group 6-like	54821	-2.18599	-11.568	1.72e-10	1.96e-09
203672_x_at	TPMT	thiopurine S-methyltransferase	7172	-2.18592	-11.019	4.1e-10	4.26e-09
232101_s_at	PIGN	phosphatidylinositol glycan anchor biosynthesis, class N	23556	-2.18549	-7.10506	5.69e-07	2.78e-06
1555167_s_at	NAMPT	nicotinamide phosphoribosyltransferase	10135	-2.18544	-8.59352	2.89e-08	1.9e-07
202922_at	GCLC	glutamate-cysteine ligase, catalytic subunit	2729	-2.18499	-6.9263	8.31e-07	3.92e-06
201675_at	AKAP1	A kinase (PRKA) anchor protein 1	8165	-2.18471	-9.52507	5.19e-09	4.06e-08
205289_at	BMP2	bone morphogenetic protein 2	650	-2.18459	-8.43728	3.9e-08	2.48e-07
220102_at	FOXL2	forkhead box L2	668	-2.18458	-14.8729	1.62e-12	3.19e-11
202847_at	PCK2	phosphoenolpyruvate carboxykinase 2 (mitochondrial)	5106	-2.18415	-11.3665	2.35e-10	2.6e-09
217814_at	CCDC47	coiled-coil domain containing 47	57003	-2.18376	-7.52061	2.41e-07	1.27e-06
202721_s_at	GFPT1	glutamine-fructose-6-phosphate transaminase 1	2673	-2.18302	-10.0006	2.25e-09	1.93e-08
200615_s_at	AP2B1	adaptor-related protein complex 2, beta 1 subunit	163	-2.18298	-8.8583	1.76e-08	1.22e-07
210277_at	AP4S1	adaptor-related protein complex 4, sigma 1 subunit	11154	-2.18295	-8.27567	5.33e-08	3.27e-07
1556316_s_at	LOC284889	hypothetical protein LOC284889	284889	-2.18245	-4.99766	6.28e-05	0.000203228
240267_at	---	---	---	-2.18168	-12.4993	4.19e-11	5.61e-10
1552521_a_at	TMEM74	transmembrane protein 74	157753	-2.18136	-10.9436	4.63e-10	4.74e-09
227391_x_at	LRRFIP1	leucine rich repeat (in FLII) interacting protein 1	9208	-2.18129	-13.8108	6.57e-12	1.09e-10
212572_at	STK38L	serine/threonine kinase 38 like	23012	-2.18054	-5.73616	1.14e-05	4.28e-05
223308_s_at	WDR5	WD repeat domain 5	11091	-2.1798	-9.14647	1.03e-08	7.51e-08
235296_at	EIF5A2	eukaryotic translation initiation factor 5A2	56648	-2.17896	-9.08707	1.15e-08	8.3e-08
219158_s_at	NARG1	NMDA receptor regulated 1	80155	-2.17875	-3.084	0.00569425	0.0123254
221090_s_at	OGFOD1	2-oxoglutarate and iron-dependent oxygenase domain containing 1	55239	-2.1773	-9.18937	9.52e-09	7e-08
1554441_a_at	WAPAL	wings apart-like homolog (Drosophila)	23063	-2.17702	-5.90727	7.75e-06	3e-05
223608_at	EFCAB2	EF-hand calcium binding domain 2	84288	-2.17646	-10.0667	2.01e-09	1.74e-08
212919_at	DCP2	DCP2 decapping enzyme homolog (S. cerevisiae)	167227	-2.17554	-6.6873	1.39e-06	6.25e-06
1554478_a_at	HEATR3	HEAT repeat containing 3	55027	-2.1755	-4.63556	0.000147364	0.000441667
209482_at	POP7	processing of precursor 7, ribonuclease P/MRP subunit (S. cerevisiae)	10248	-2.17501	-13.5304	9.64e-12	1.53e-10
227278_at	---	---	---	-2.17483	-14.5577	2.43e-12	4.53e-11
231022_at	---	---	---	-2.17464	-9.72767	3.62e-09	2.95e-08
208017_s_at	MCF2	MCF.2 cell line derived transforming sequence	4168	-2.17318	-11.3757	2.32e-10	2.56e-09
212989_at	SGMS1	sphingomyelin synthase 1	259230	-2.17306	-5.97046	6.72e-06	2.64e-05
201989_s_at	CREBL2	cAMP responsive element binding protein-like 2	1389	-2.17284	-8.44936	3.81e-08	2.43e-07
202525_at	PRSS8	protease, serine, 8	5652	-2.17235	-8.17879	6.44e-08	3.87e-07
235197_s_at	OSTM1	osteopetrosis associated transmembrane protein 1	28962	-2.17229	-10.1384	1.77e-09	1.56e-08
238448_at	MRPL19	mitochondrial ribosomal protein L19	9801	-2.17221	-8.97669	1.41e-08	1e-07
225710_at	GNB4	guanine nucleotide binding protein (G protein), beta polypeptide 4	59345	-2.1717	-8.4146	4.07e-08	2.58e-07
207153_s_at	GLMN	glomulin, FKBP associated protein	11146	-2.1715	-10.1475	1.75e-09	1.54e-08
212959_s_at	GNPTAB	N-acetylglucosamine-1-phosphate transferase, alpha and beta subunits	79158	-2.17096	-9.17583	9.76e-09	7.17e-08
242346_x_at	---	---	---	-2.17032	-9.75574	3.45e-09	2.82e-08
227708_at	EEF1A1	eukaryotic translation elongation factor 1 alpha 1	1915	-2.16997	-10.2816	1.39e-09	1.26e-08
202054_s_at	ALDH3A2	aldehyde dehydrogenase 3 family, member A2	224	-2.16884	-12.2117	6.41e-11	8.19e-10
226025_at	ANKRD28	ankyrin repeat domain 28	23243	-2.16867	-7.35267	3.4e-07	1.74e-06
204331_s_at	MRPS12	mitochondrial ribosomal protein S12	6183	-2.16829	-5.02904	5.84e-05	0.000190054
222738_at	WWC2	WW and C2 domain containing 2	80014	-2.16789	-7.40578	3.04e-07	1.57e-06
206288_at	PGGT1B	protein geranylgeranyltransferase type I, beta subunit	5229	-2.16777	-8.23481	5.77e-08	3.51e-07
229573_at	USP9X	ubiquitin specific peptidase 9, X-linked	8239	-2.16772	-8.34346	4.67e-08	2.9e-07
229796_at	SIX4	SIX homeobox 4	51804	-2.16755	-7.78763	1.4e-07	7.78e-07
201554_x_at	GYG1	glycogenin 1	2992	-2.1674	-11.8358	1.13e-10	1.36e-09
226686_at	CISD2	CDGSH iron sulfur domain 2	493856	-2.16715	-11.7604	1.27e-10	1.5e-09
204881_s_at	UGCG	UDP-glucose ceramide glucosyltransferase	7357	-2.16664	-8.46069	3.73e-08	2.38e-07
230511_at	CREM	cAMP responsive element modulator	1390	-2.16639	-5.61093	1.52e-05	5.56e-05
201520_s_at	GRSF1	G-rich RNA sequence binding factor 1	2926	-2.16561	-7.92505	1.06e-07	6.08e-07
201872_s_at	ABCE1	ATP-binding cassette, sub-family E (OABP), member 1	6059	-2.16481	-6.75049	1.21e-06	5.51e-06
228463_at	FOXA3	forkhead box A3	3171	-2.16466	-13.2343	1.46e-11	2.2e-10
217881_s_at	CDC27	cell division cycle 27 homolog (S. cerevisiae)	996	-2.16453	-4.35104	0.000289191	0.000817871
208699_x_at	TKT	transketolase	7086	-2.16396	-7.47145	2.66e-07	1.39e-06
203764_at	DLGAP5	discs, large (Drosophila) homolog-associated protein 5	9787	-2.16346	-4.98003	6.55e-05	0.000210927
239292_at	---	---	---	-2.16325	-6.35011	2.89e-06	1.22e-05
213572_s_at	SERPINB1	serpin peptidase inhibitor, clade B (ovalbumin), member 1	1992	-2.1632	-4.59776	0.000161142	0.000479393
219274_at	TSPAN12	tetraspanin 12	23554	-2.16288	-6.38308	2.69e-06	1.14e-05
228485_s_at	SLC44A1	solute carrier family 44, member 1	23446	-2.16228	-8.33665	4.74e-08	2.94e-07
227493_s_at	KIAA1143	KIAA1143	57456	-2.1622	-13.7702	6.94e-12	1.14e-10
212417_at	SCAMP1	secretory carrier membrane protein 1	9522	-2.16183	-3.65267	0.00151459	0.00371795
201926_s_at	CD55	CD55 molecule, decay accelerating factor for complement (Cromer blood group)	1604	-2.16069	-13.3663	1.21e-11	1.86e-10
219395_at	ESRP2	epithelial splicing regulatory protein 2	80004	-2.16009	-9.47193	5.71e-09	4.42e-08
1556061_at	RPP30	ribonuclease P/MRP 30kDa subunit	10556	-2.15989	-6.77325	1.15e-06	5.28e-06
226283_at	WDR51B	WD repeat domain 51B	282809	-2.1594	-6.54784	1.87e-06	8.21e-06
201172_x_at	ATP6V0E1	ATPase, H+ transporting, lysosomal 9kDa, V0 subunit e1	8992	-2.15883	-13.5642	9.2e-12	1.46e-10
213629_x_at	MT1F	metallothionein 1F	4494	-2.1579	-10.6066	8.06e-10	7.76e-09
228351_at	HEATR1	HEAT repeat containing 1	55127	-2.15789	-8.12518	7.16e-08	4.25e-07
213608_s_at	SRRD	SRR1 domain containing	402055	-2.15731	-13.481	1.03e-11	1.62e-10
226631_at	METTL10	methyltransferase like 10	399818	-2.15731	-10.6544	7.44e-10	7.23e-09
228440_at	---	---	---	-2.15707	-16.9198	1.37e-13	3.59e-12
219530_at	PALB2	partner and localizer of BRCA2	79728	-2.15655	-6.12726	4.73e-06	1.92e-05
218936_s_at	CCDC59	coiled-coil domain containing 59	29080	-2.1554	-9.79773	3.2e-09	2.64e-08
213757_at	---	---	---	-2.15517	-5.59076	1.59e-05	5.79e-05
203127_s_at	SPTLC2	serine palmitoyltransferase, long chain base subunit 2	9517	-2.15432	-10.2557	1.45e-09	1.31e-08
225438_at	NUDCD1	NudC domain containing 1	84955	-2.15391	-6.08848	5.16e-06	2.07e-05
222360_at	DPH5	DPH5 homolog (S. cerevisiae)	51611	-2.15304	-9.03053	1.27e-08	9.13e-08
244246_at	MIPOL1	mirror-image polydactyly 1	145282	-2.15129	-7.85891	1.21e-07	6.85e-07
203095_at	MTIF2	mitochondrial translational initiation factor 2	4528	-2.1494	-14.8566	1.66e-12	3.24e-11
221618_s_at	TAF9B	TAF9B RNA polymerase II, TATA box binding protein (TBP)-associated factor, 31kDa	51616	-2.14859	-2.74733	0.0121749	0.0244836
222609_s_at	EXOSC1	exosome component 1	51013	-2.14849	-8.90239	1.62e-08	1.13e-07
223255_at	G2E3	G2/M-phase specific E3 ubiquitin ligase	55632	-2.14811	-5.43112	2.29e-05	8.09e-05
211702_s_at	USP32	ubiquitin specific peptidase 32	84669	-2.14801	-12.2298	6.24e-11	7.99e-10
223267_at	RG9MTD1	RNA (guanine-9-) methyltransferase domain containing 1	54931	-2.14735	-9.94839	2.46e-09	2.09e-08
217974_at	TM7SF3	transmembrane 7 superfamily member 3	51768	-2.14629	-10.1544	1.73e-09	1.52e-08
202187_s_at	PPP2R5A	protein phosphatase 2, regulatory subunit B', alpha isoform	5525	-2.14544	-10.5648	8.64e-10	8.27e-09
202654_x_at	2011-03-07	membrane-associated ring finger (C3HC4) 7	64844	-2.14542	-4.1539	0.00046186	0.00125633
203715_at	TBCE	tubulin folding cofactor E	6905	-2.14517	-11.3648	2.36e-10	2.6e-09
218671_s_at	ATPIF1	ATPase inhibitory factor 1	93974	-2.14514	-9.79869	3.2e-09	2.64e-08
219119_at	LSM8	LSM8 homolog, U6 small nuclear RNA associated (S. cerevisiae)	51691	-2.14446	-11.9081	1.01e-10	1.23e-09
209211_at	KLF5	Kruppel-like factor 5 (intestinal)	688	-2.14433	-9.68705	3.89e-09	3.14e-08
222679_s_at	DCUN1D1	DCN1, defective in cullin neddylation 1, domain containing 1 (S. cerevisiae)	54165	-2.14362	-3.7707	0.00114614	0.00288655
215207_x_at	LOC646208 /// NUS1 /// YDD19	nuclear undecaprenyl pyrophosphate synthase 1 pseudogene /// nuclear undecaprenyl pyrophosphate synthase 1 homolog (S. cerevisiae) /// YDD19 protein	11049 /// 116150 /// 646208	-2.14359	-7.50047	2.51e-07	1.32e-06
205571_at	LIPT1	lipoyltransferase 1	51601	-2.14282	-7.88995	1.14e-07	6.48e-07
201725_at	CDC123	cell division cycle 123 homolog (S. cerevisiae)	8872	-2.1417	-9.74263	3.53e-09	2.88e-08
212532_s_at	LSM12	LSM12 homolog (S. cerevisiae)	124801	-2.14161	-14.5825	2.36e-12	4.41e-11
230060_at	CDCA7	cell division cycle associated 7	83879	-2.14081	-5.61727	1.5e-05	5.48e-05
215438_x_at	GSPT1	G1 to S phase transition 1	2935	-2.14046	-12.5871	3.68e-11	5.01e-10
203202_at	KRR1	KRR1, small subunit (SSU) processome component, homolog (yeast)	11103	-2.14031	-6.16811	4.32e-06	1.77e-05
240254_at	---	---	---	-2.13957	-7.82904	1.29e-07	7.22e-07
202113_s_at	SNX2	sorting nexin 2	6643	-2.13929	-13.6397	8.29e-12	1.33e-10
200987_x_at	PSME3	proteasome (prosome, macropain) activator subunit 3 (PA28 gamma; Ki)	10197	-2.13871	-12.0438	8.26e-11	1.02e-09
211711_s_at	PTEN	phosphatase and tensin homolog	5728	-2.13862	-5.04713	5.6e-05	0.000182772
211423_s_at	SC5DL	sterol-C5-desaturase (ERG3 delta-5-desaturase homolog, S. cerevisiae)-like	6309	-2.13852	-12.5984	3.62e-11	4.94e-10
212432_at	GRPEL1	GrpE-like 1, mitochondrial (E. coli)	80273	-2.13842	-10.0203	2.17e-09	1.87e-08
204616_at	UCHL3	ubiquitin carboxyl-terminal esterase L3 (ubiquitin thiolesterase)	7347	-2.13796	-10.4934	9.73e-10	9.18e-09
223738_s_at	PGM2	phosphoglucomutase 2	55276	-2.13793	-8.58862	2.92e-08	1.91e-07
228966_at	PANK2	Pantothenate kinase 2	80025	-2.13791	-8.27574	5.33e-08	3.27e-07
201514_s_at	G3BP1	GTPase activating protein (SH3 domain) binding protein 1	10146	-2.13776	-5.15161	4.39e-05	0.000146133
219055_at	SRBD1	S1 RNA binding domain 1	55133	-2.13764	-5.70854	1.22e-05	4.53e-05
225071_at	NUS1	nuclear undecaprenyl pyrophosphate synthase 1 homolog (S. cerevisiae)	116150	-2.13686	-6.45071	2.32e-06	9.94e-06
201144_s_at	EIF2S1	eukaryotic translation initiation factor 2, subunit 1 alpha, 35kDa	1965	-2.13621	-18.2798	3.04e-14	9.72e-13
213599_at	OIP5	Opa interacting protein 5	11339	-2.13583	-15.933	4.35e-13	1e-11
208969_at	NDUFA9	NADH dehydrogenase (ubiquinone) 1 alpha subcomplex, 9, 39kDa	4704	-2.13574	-14.7406	1.92e-12	3.7e-11
225295_at	SLC39A10	solute carrier family 39 (zinc transporter), member 10	57181	-2.13558	-10.0194	2.18e-09	1.88e-08
226421_at	AMMECR1	Alport syndrome, mental retardation, midface hypoplasia and elliptocytosis chromosomal region gene 1	9949	-2.13452	-7.9297	1.05e-07	6.03e-07
204517_at	PPIC	peptidylprolyl isomerase C (cyclophilin C)	5480	-2.13443	-11.4519	2.06e-10	2.3e-09
230954_at	C20orf112	chromosome 20 open reading frame 112	140688	-2.1344	-8.44944	3.81e-08	2.43e-07
223100_s_at	NUDT5	nudix (nucleoside diphosphate linked moiety X)-type motif 5	11164	-2.13431	-14.3441	3.22e-12	5.8e-11
219773_at	NOX4	NADPH oxidase 4	50507	-2.13341	-4.73045	0.000117777	0.000360198
201297_s_at	MOBKL1B	MOB1, Mps One Binder kinase activator-like 1B (yeast)	55233	-2.13332	-11.7964	1.2e-10	1.43e-09
217080_s_at	HOMER2	homer homolog 2 (Drosophila)	9455	-2.13264	-9.40028	6.49e-09	4.96e-08
230067_at	FAM124A	Family with sequence similarity 124A	220108	-2.13153	-8.93243	1.53e-08	1.08e-07
210766_s_at	CSE1L	CSE1 chromosome segregation 1-like (yeast)	1434	-2.13153	-6.05159	5.6e-06	2.24e-05
212693_at	MDN1	MDN1, midasin homolog (yeast)	23195	-2.12933	-8.94845	1.48e-08	1.05e-07
218047_at	OSBPL9	oxysterol binding protein-like 9	114883	-2.12894	-7.79438	1.38e-07	7.68e-07
201274_at	PSMA5	proteasome (prosome, macropain) subunit, alpha type, 5	5686	-2.12887	-10.2068	1.58e-09	1.41e-08
222573_s_at	SAV1	salvador homolog 1 (Drosophila)	60485	-2.12778	-8.19718	6.21e-08	3.75e-07
210187_at	FKBP1A	FK506 binding protein 1A, 12kDa	2280	-2.12731	-12.7379	2.96e-11	4.11e-10
226998_at	NARG1	NMDA receptor regulated 1	80155	-2.12629	-7.77787	1.43e-07	7.92e-07
226813_at	C1orf57	chromosome 1 open reading frame 57	84284	-2.12629	-11.9971	8.86e-11	1.09e-09
218104_at	TEX10	testis expressed 10	54881	-2.12627	-10.4805	9.94e-10	9.35e-09
203773_x_at	BLVRA	biliverdin reductase A	644	-2.12593	-17.8298	4.94e-14	1.49e-12
221489_s_at	SPRY4	sprouty homolog 4 (Drosophila)	81848	-2.12562	-10.8516	5.38e-10	5.43e-09
212805_at	PRUNE2	prune homolog 2 (Drosophila)	158471	-2.12506	-9.00282	1.34e-08	9.57e-08
212490_at	DNAJC8	DnaJ (Hsp40) homolog, subfamily C, member 8	22826	-2.12448	-9.01279	1.32e-08	9.42e-08
203721_s_at	UTP18	UTP18, small subunit (SSU) processome component, homolog (yeast)	51096	-2.12419	-12.485	4.28e-11	5.72e-10
219412_at	RAB38	RAB38, member RAS oncogene family	23682	-2.12418	-11.3307	2.49e-10	2.73e-09
211729_x_at	BLVRA	biliverdin reductase A	644	-2.12384	-17.1345	1.07e-13	2.91e-12
[truncated: 3,036 more rows]
[truncated: 3 more columns]

## Sheet: Table S3B_Thalidomide 0.01μM
Probe Set ID	Gene Symbol	Gene Title	Entrez Gene ID	Linear Fold change	t	P.Value	adj.P.Val
201438_at	COL6A3	collagen, type VI, alpha 3	1293	-2.02755	-9.60166	4.53e-09	4.33e-05
202311_s_at	COL1A1	collagen, type I, alpha 1	1277	-2.01668	-4.295	0.000330336	0.0283016
229057_at	SCN2A	sodium channel, voltage-gated, type II, alpha subunit	6326	2.01076	5.58125	1.62e-05	0.00830656
201859_at	SRGN	serglycin	5552	2.06467	7.93497	1.04e-07	0.000260045
235342_at	SPOCK3	sparc/osteonectin, cwcv and kazal-like domains proteoglycan (testican) 3	50859	2.36669	5.55865	1.71e-05	0.00847883

## Sheet: Table S3C_Thalidomide 0.1μM
Probe Set ID	Gene Symbol	Gene Title	Entrez Gene ID	Linear Fold change	t	P.Value	adj.P.Val
230045_at	CNTN2	contactin 2 (axonal)	6900	-2.47395	-16.5261	2.15e-13	6.94e-09
214577_at	MAP1B	microtubule-associated protein 1B	4131	-2.14314	-3.16948	0.00467904	0.0465648
230472_at	IRX1	iroquois homeobox 1	79192	-2.11838	-9.57103	4.78e-09	7.03e-06
201118_at	PGD	phosphogluconate dehydrogenase	5226	-2.04689	-3.85647	0.000935523	0.0167531
239230_at	HES5	hairy and enhancer of split 5 (Drosophila)	388585	-2.03377	-7.67245	1.77e-07	7.2e-05
227760_at	IGFBPL1	insulin-like growth factor binding protein-like 1	347252	-2.0263	-12.7777	2.79e-11	4.49e-07
231268_at	LOC645895 /// MYBL1	hypothetical LOC645895 /// v-myb myeloblastosis viral oncogene homolog (avian)-like 1	4603 /// 645895	-2.00511	-7.05352	6.35e-07	0.00015705
226228_at	AQP4	aquaporin 4	361	2.18111	6.14084	4.59e-06	0.000543103
1553934_at	C18orf20	chromosome 18 open reading frame 20	221241	2.20462	10.2028	1.59e-09	3.97e-06
216929_x_at	ABO	ABO blood group (transferase A, alpha 1-3-N-acetylgalactosaminyltransferase; transferase B, alpha 1-3-galactosyltransferase)	28	2.25625	7.45965	2.73e-07	9.46e-05
207102_at	AKR1D1	aldo-keto reductase family 1, member D1 (delta 4-3-ketosteroid-5-beta-reductase)	6718	2.25631	9.28499	8e-09	9.91e-06
231120_x_at	PKIB	protein kinase (cAMP-dependent, catalytic) inhibitor beta	5570	2.41946	5.26135	3.4e-05	0.00200761

## Sheet: Table S3D_Thalidomide 1μM
Probe Set ID	Gene Symbol	Gene Title	Entrez Gene ID	Linear Fold change	t	P.Value	adj.P.Val
216238_s_at	FGB	fibrinogen beta chain	2244	-10.6924	-9.16507	9.95e-09	2.69e-06
219465_at	APOA2	apolipoprotein A-II	336	-7.60925	-12.76	2.86e-11	2.56e-08
205892_s_at	FABP1	fatty acid binding protein 1, liver	2168	-7.32444	-14.206	3.86e-12	5.41e-09
219466_s_at	APOA2	apolipoprotein A-II	336	-7.17913	-16.6543	1.86e-13	4.98e-10
219612_s_at	FGG	fibrinogen gamma chain	2266	-6.83654	-21.8682	8.88e-16	7.15e-12
205649_s_at	FGA	fibrinogen alpha chain	2243	-6.62354	-25.2443	5.05e-17	1.63e-12
204988_at	FGB	fibrinogen beta chain	2244	-6.43372	-21.9185	8.48e-16	7.15e-12
204694_at	AFP	alpha-fetoprotein	174	-5.32817	-24.0627	1.32e-16	2.12e-12
205820_s_at	APOC3	apolipoprotein C-III	345	-5.12827	-11.2924	2.65e-10	1.31e-07
202833_s_at	SERPINA1	serpin peptidase inhibitor, clade A (alpha-1 antiproteinase, antitrypsin), member 1	5265	-4.99865	-7.00627	7.01e-07	6.29e-05
204450_x_at	APOA1	apolipoprotein A-I	335	-4.86099	-10.2687	1.42e-09	5.2e-07
210929_s_at	AHSG /// LOC100131613	alpha-2-HS-glycoprotein /// PRO1454	100131613 /// 197	-4.59803	-11.4624	2.02e-10	1.1e-07
219140_s_at	RBP4	retinol binding protein 4, plasma	5950	-4.49791	-9.61646	4.41e-09	1.34e-06
201650_at	KRT19	keratin 19	3880	-4.46019	-17.9466	4.35e-14	1.59e-10
201131_s_at	CDH1	cadherin 1, type 1, E-cadherin (epithelial)	999	-4.26536	-11.1659	3.24e-10	1.47e-07
205650_s_at	FGA	fibrinogen alpha chain	2243	-3.80634	-17.927	4.44e-14	1.59e-10
202409_at	IGF2 /// INS-IGF2	insulin-like growth factor 2 (somatomedin A) /// INS-IGF2 readthrough transcript	3481 /// 723961	-3.52036	-6.96446	7.66e-07	6.74e-05
217073_x_at	APOA1	apolipoprotein A-I	335	-3.45602	-11.1903	3.11e-10	1.45e-07
220138_at	HAND1	heart and neural crest derivatives expressed 1	9421	-3.4089	-12.1876	6.65e-11	5.1e-08
212143_s_at	IGFBP3	insulin-like growth factor binding protein 3	3486	-3.24642	-19.6352	7.47e-15	4.35e-11
205919_at	HBE1	hemoglobin, epsilon 1	3046	-3.2438	-13.5078	9.94e-12	1.21e-08
203698_s_at	FRZB	frizzled-related protein	2487	-3.23481	-19.5536	8.11e-15	4.35e-11
201839_s_at	EPCAM	epithelial cell adhesion molecule	4072	-3.2119	-12.8243	2.61e-11	2.4e-08
207542_s_at	AQP1	aquaporin 1 (Colton blood group)	358	-3.10115	-6.08067	5.25e-06	0.000262965
209047_at	AQP1	aquaporin 1 (Colton blood group)	358	-3.09719	-11.5536	1.75e-10	1.03e-07
210664_s_at	TFPI	tissue factor pathway inhibitor (lipoprotein-associated coagulation inhibitor)	7035	-3.0528	-16.0469	3.8e-13	8.84e-10
210095_s_at	IGFBP3	insulin-like growth factor binding protein 3	3486	-3.03234	-18.498	2.41e-14	1.11e-10
206894_at	APOA4	apolipoprotein A-IV	337	-2.99581	-12.0407	8.3e-11	6.07e-08
200606_at	DSP	desmoplakin	1832	-2.98499	-11.5076	1.88e-10	1.06e-07
205108_s_at	APOB	apolipoprotein B (including Ag(x) antigen)	338	-2.97133	-9.8246	3.06e-09	9.91e-07
208949_s_at	LGALS3	lectin, galactoside-binding, soluble, 3	3958	-2.97116	-16.0366	3.84e-13	8.84e-10
214146_s_at	PPBP	pro-platelet basic protein (chemokine (C-X-C motif) ligand 7)	5473	-2.96932	-13.4925	1.02e-11	1.21e-08
223044_at	SLC40A1	solute carrier family 40 (iron-regulated transporter), member 1	30061	-2.92107	-10.2832	1.39e-09	5.13e-07
201578_at	PODXL	podocalyxin-like	5420	-2.92087	-14.8432	1.68e-12	3e-09
210665_at	TFPI	tissue factor pathway inhibitor (lipoprotein-associated coagulation inhibitor)	7035	-2.85361	-6.78018	1.13e-06	9.02e-05
213258_at	TFPI	tissue factor pathway inhibitor (lipoprotein-associated coagulation inhibitor)	7035	-2.83909	-10.9027	4.95e-10	2.07e-07
213515_x_at	HBG1 /// HBG2	hemoglobin, gamma A /// hemoglobin, gamma G	3047 /// 3048	-2.81105	-13.952	5.42e-12	7.28e-09
211429_s_at	SERPINA1	serpin peptidase inhibitor, clade A (alpha-1 antiproteinase, antitrypsin), member 1	5265	-2.80913	-9.30374	7.73e-09	2.16e-06
203074_at	ANXA8 /// ANXA8L1 /// ANXA8L2	annexin A8 /// annexin A8-like 1 /// annexin A8-like 2	244 /// 653145 /// 728113	-2.77679	-11.673	1.46e-10	8.69e-08
219823_at	LIN28	lin-28 homolog (C. elegans)	79727	-2.76589	-12.9754	2.1e-11	2.11e-08
225911_at	NPNT	nephronectin	255743	-2.74991	-8.02557	8.71e-08	1.31e-05
204114_at	NID2	nidogen 2 (osteonidogen)	22795	-2.74596	-16.8784	1.43e-13	4.2e-10
206286_s_at	TDGF1 /// TDGF3	teratocarcinoma-derived growth factor 1 /// teratocarcinoma-derived growth factor 3, pseudogene	6997 /// 6998	-2.74123	-13.0235	1.96e-11	2.04e-08
204419_x_at	HBG1 /// HBG2	hemoglobin, gamma A /// hemoglobin, gamma G	3047 /// 3048	-2.65523	-11.2716	2.74e-10	1.33e-07
200872_at	S100A10	S100 calcium binding protein A10	6281	-2.63958	-10.7307	6.56e-10	2.61e-07
202856_s_at	SLC16A3	solute carrier family 16, member 3 (monocarboxylic acid transporter 4)	9123	-2.59572	-9.72861	3.62e-09	1.14e-06
203697_at	FRZB	frizzled-related protein	2487	-2.58283	-15.4748	7.61e-13	1.53e-09
205523_at	HAPLN1	hyaluronan and proteoglycan link protein 1	1404	-2.53481	-14.8055	1.77e-12	3e-09
203642_s_at	COBLL1	COBL-like 1	22837	-2.52717	-8.31708	4.92e-08	8.75e-06
206367_at	REN	renin	5972	-2.48921	-8.12894	7.1e-08	1.14e-05
203382_s_at	APOE	apolipoprotein E	348	-2.46276	-13.1317	1.68e-11	1.87e-08
209960_at	HGF	hepatocyte growth factor (hepapoietin A; scatter factor)	3082	-2.45363	-8.91271	1.59e-08	3.76e-06
206239_s_at	SPINK1	serine peptidase inhibitor, Kazal type 1	6690	-2.44306	-8.4876	3.54e-08	6.79e-06
210002_at	GATA6	GATA binding protein 6	2627	-2.41095	-8.30473	5.04e-08	8.92e-06
201349_at	SLC9A3R1	solute carrier family 9 (sodium/hydrogen exchanger), member 3 regulator 1	9368	-2.39894	-10.8614	5.3e-10	2.19e-07
207717_s_at	PKP2	plakophilin 2	5318	-2.39121	-5.18895	4.02e-05	0.00117587
226847_at	FST	follistatin	10468	-2.37072	-12.5066	4.14e-11	3.42e-08
210258_at	RGS13	regulator of G-protein signaling 13	6003	-2.36872	-8.11251	7.34e-08	1.17e-05
200878_at	EPAS1	endothelial PAS domain protein 1	2034	-2.35607	-11.2645	2.77e-10	1.33e-07
203381_s_at	APOE	apolipoprotein E	348	-2.35113	-4.92358	7.48e-05	0.00182244
202499_s_at	SLC2A3	solute carrier family 2 (facilitated glucose transporter), member 3	6515	-2.34847	-9.60507	4.5e-09	1.35e-06
243161_x_at	ZFP42	zinc finger protein 42 homolog (mouse)	132625	-2.33242	-8.40287	4.17e-08	7.8e-06
208096_s_at	COL21A1	collagen, type XXI, alpha 1	81578	-2.33226	-8.50082	3.45e-08	6.66e-06
201438_at	COL6A3	collagen, type VI, alpha 3	1293	-2.32387	-11.4546	2.05e-10	1.1e-07
209369_at	ANXA3	annexin A3	306	-2.29546	-12.3284	5.39e-11	4.23e-08
217901_at	DSG2	desmoglein 2	1829	-2.2894	-12.4807	4.3e-11	3.46e-08
231734_at	RBP2	retinol binding protein 2, cellular	5948	-2.28741	-10.6068	8.06e-10	3.09e-07
205374_at	SLN	sarcolipin	6588	-2.28372	-10.7715	6.14e-10	2.5e-07
209723_at	SERPINB9	serpin peptidase inhibitor, clade B (ovalbumin), member 9	5272	-2.28144	-14.2125	3.83e-12	5.41e-09
212812_at	---	---	---	-2.28011	-11.3656	2.36e-10	1.22e-07
226582_at	LOC400043	hypothetical LOC400043	400043	-2.2789	-11.8742	1.07e-10	7.14e-08
207558_s_at	PITX2	paired-like homeodomain 2	5308	-2.27724	-15.0878	1.23e-12	2.34e-09
203924_at	GSTA1	glutathione S-transferase alpha 1	2938	-2.27687	-11.73	1.33e-10	8.26e-08
213506_at	F2RL1	coagulation factor II (thrombin) receptor-like 1	2150	-2.27665	-7.71765	1.61e-07	2.11e-05
211813_x_at	DCN	decorin	1634	-2.26502	-9.00288	1.34e-08	3.36e-06
209905_at	HOXA9	homeobox A9	3205	-2.24516	-9.8571	2.89e-09	9.69e-07
231310_at	---	---	---	-2.22514	-14.405	2.97e-12	4.56e-09
209488_s_at	RBPMS	RNA binding protein with multiple splicing	11030	-2.20176	-6.04939	5.63e-06	0.000272682
231061_at	---	---	---	-2.20002	-5.96396	6.82e-06	0.000319209
209008_x_at	KRT8	keratin 8	3856	-2.18942	-4.50886	0.000198897	0.00373921
204416_x_at	APOC1	apolipoprotein C-I	341	-2.1733	-8.47899	3.6e-08	6.86e-06
223000_s_at	F11R	F11 receptor	50848	-2.16848	-11.4981	1.91e-10	1.06e-07
227361_at	HS3ST3B1	heparan sulfate (glucosamine) 3-O-sulfotransferase 3B1	9953	-2.14378	-6.43013	2.42e-06	0.000154857
202007_at	NID1	nidogen 1	4811	-2.13566	-6.05274	5.59e-06	0.000271799
201427_s_at	SEPP1	selenoprotein P, plasma, 1	6414	-2.1329	-8.86178	1.74e-08	4.01e-06
202995_s_at	FBLN1	fibulin 1	2192	-2.12905	-5.87615	8.31e-06	0.000367135
201028_s_at	CD99	CD99 molecule	4267	-2.12756	-3.91627	0.0008119	0.0101421
229452_at	TMEM88	transmembrane protein 88	92162	-2.12476	-8.3221	4.87e-08	8.72e-06
211719_x_at	FN1	fibronectin 1	2335	-2.11785	-13.834	6.36e-12	8.2e-09
224583_at	COTL1	coactosin-like 1 (Dictyostelium)	23406	-2.11702	-7.20841	4.59e-07	4.69e-05
209081_s_at	COL18A1	collagen, type XVIII, alpha 1	80781	-2.10837	-9.86464	2.85e-09	9.66e-07
212464_s_at	FN1	fibronectin 1	2335	-2.10199	-14.4293	2.88e-12	4.56e-09
202311_s_at	COL1A1	collagen, type I, alpha 1	1277	-2.09586	-4.5308	0.000188821	0.00359384
203887_s_at	THBD	thrombomodulin	7056	-2.09425	-6.06131	5.48e-06	0.000269565
203325_s_at	COL5A1	collagen, type V, alpha 1	1289	-2.09222	-12.8403	2.55e-11	2.4e-08
204337_at	RGS4	regulator of G-protein signaling 4	5999	-2.05298	-7.23778	4.31e-07	4.42e-05
204731_at	TGFBR3	transforming growth factor, beta receptor III	7049	-2.04813	-5.48052	2.05e-05	0.000723825
208629_s_at	HADHA	hydroxyacyl-Coenzyme A dehydrogenase/3-ketoacyl-Coenzyme A thiolase/enoyl-Coenzyme A hydratase (trifunctional protein), alpha subunit	3030	-2.04689	-3.06195	0.00598893	0.0392725
1554012_at	RSPO2	R-spondin 2 homolog (Xenopus laevis)	340419	-2.04162	-5.16323	4.27e-05	0.00122422
211896_s_at	DCN	decorin	1634	-2.03954	-7.68668	1.72e-07	2.21e-05
212520_s_at	SMARCA4	SWI/SNF related, matrix associated, actin dependent regulator of chromatin, subfamily a, member 4	6597	-2.03651	-3.78584	0.00110581	0.0125569
212032_s_at	PTOV1	prostate tumor overexpressed 1	53635	-2.0352	-4.3109	0.000318103	0.00522396
231268_at	LOC645895 /// MYBL1	hypothetical LOC645895 /// v-myb myeloblastosis viral oncogene homolog (avian)-like 1	4603 /// 645895	-2.03496	-7.20333	4.63e-07	4.72e-05
204805_s_at	H1FX	H1 histone family, member X	8971	-2.03003	-4.89556	7.98e-05	0.00191164
1567458_s_at	RAC1	ras-related C3 botulinum toxin substrate 1 (rho family, small GTP binding protein Rac1)	5879	-2.02919	-6.38282	2.69e-06	0.000164772
213428_s_at	COL6A1	collagen, type VI, alpha 1	1291	-2.02719	-12.0038	8.77e-11	6.28e-08
225899_x_at	FLJ45445 /// LOC643670 /// LOC728105 /// tcag7.907	hypothetical LOC399844 /// similar to hCG1739109 /// similar to hCG1739109 /// hypothetical LOC402483	399844 /// 402483 /// 643670 /// 728105	-2.02515	-11.9589	9.39e-11	6.58e-08
209035_at	MDK	midkine (neurite growth-promoting factor 2)	4192	-2.0243	-3.59871	0.00171992	0.0168302
206893_at	SALL1	sal-like 1 (Drosophila)	6299	-2.02027	-5.72037	1.18e-05	0.000479787
210220_at	FZD2	frizzled homolog 2 (Drosophila)	2535	-2.01927	-6.56715	1.8e-06	0.000128283
201859_at	SRGN	serglycin	5552	-2.01736	-7.68125	1.73e-07	2.22e-05
217744_s_at	PERP	PERP, TP53 apoptosis effector	64065	-2.01322	-9.11952	1.08e-08	2.85e-06
206742_at	FIGF	c-fos induced growth factor (vascular endothelial growth factor D)	2277	-2.00959	-8.07922	7.83e-08	1.22e-05
1553993_s_at	MED25	mediator complex subunit 25	81857	-2.00425	-11.0938	3.63e-10	1.58e-07
204624_at	ATP7B	ATPase, Cu++ transporting, beta polypeptide	540	-2.00091	-9.21413	9.1e-09	2.5e-06
202558_s_at	HSPA13	heat shock protein 70kDa family, member 13	6782	2.00075	2.90981	0.00846198	0.0499615
207447_s_at	MGAT4C	mannosyl (alpha-1,3-)-glycoprotein beta-1,4-N-acetylglucosaminyltransferase, isozyme C (putative)	25834	2.00568	5.00283	6.21e-05	0.0015893
233071_at	RSPH4A	radial spoke head 4 homolog A (Chlamydomonas)	345895	2.02051	8.16692	6.59e-08	1.08e-05
200795_at	SPARCL1	SPARC-like 1 (hevin)	8404	2.02093	6.48634	2.14e-06	0.000143514
241998_at	C2orf80	chromosome 2 open reading frame 80	389073	2.03504	7.14982	5.18e-07	5.06e-05
234303_s_at	GPR85	G protein-coupled receptor 85	54329	2.03923	6.43768	2.38e-06	0.000153863
236335_at	---	---	---	2.04017	5.34166	2.82e-05	0.00090927
204591_at	CHL1	cell adhesion molecule with homology to L1CAM (close homolog of L1)	10752	2.04286	5.73482	1.14e-05	0.000467815
244170_at	---	---	---	2.04964	3.71039	0.00132174	0.014027
216929_x_at	ABO	ABO blood group (transferase A, alpha 1-3-N-acetylgalactosaminyltransferase; transferase B, alpha 1-3-galactosyltransferase)	28	2.04977	6.57976	1.75e-06	0.000126552
219703_at	MNS1	meiosis-specific nuclear structural 1	55329	2.05568	5.03926	5.7e-05	0.00150227
232231_at	RUNX2	runt-related transcription factor 2	860	2.0719	5.21698	3.77e-05	0.00112411
229012_at	C9orf24	chromosome 9 open reading frame 24	84688	2.0804	8.16067	6.67e-08	1.09e-05
238116_at	DYNLRB2	dynein, light chain, roadblock-type 2	83657	2.09995	9.51305	5.3e-09	1.58e-06
240065_at	FAM81B	family with sequence similarity 81, member B	153643	2.14016	6.90005	8.79e-07	7.45e-05
229057_at	SCN2A	sodium channel, voltage-gated, type II, alpha subunit	6326	2.15133	6.12118	4.8e-06	0.000247851
1553415_at	SLC17A8	solute carrier family 17 (sodium-dependent inorganic phosphate cotransporter), member 8	246213	2.19163	8.55218	3.13e-08	6.26e-06
231077_at	C1orf192	chromosome 1 open reading frame 192	257177	2.26195	11.6839	1.43e-10	8.69e-08
227140_at	---	---	---	2.32756	5.60402	1.54e-05	0.000584404
206439_at	EPYC	epiphycan	1833	2.47589	11.1983	3.07e-10	1.45e-07
201163_s_at	IGFBP7	insulin-like growth factor binding protein 7	3490	2.50204	16.9155	1.37e-13	4.2e-10
225664_at	COL12A1	collagen, type XII, alpha 1	1303	2.51827	8.54872	3.15e-08	6.26e-06
235342_at	SPOCK3	sparc/osteonectin, cwcv and kazal-like domains proteoglycan (testican) 3	50859	2.75647	6.54234	1.9e-06	0.000132553
211479_s_at	HTR2C	5-hydroxytryptamine (serotonin) receptor 2C	3358	2.86672	12.1586	6.95e-11	5.2e-08
218706_s_at	GRAMD3	GRAM domain containing 3	65983	2.94982	10.6781	7.16e-10	2.81e-07
237281_at	AKAP14	A kinase (PRKA) anchor protein 14	158798	3.03373	9.88359	2.76e-09	9.45e-07
1553126_a_at	SLC39A12	solute carrier family 39 (zinc transporter), member 12	221074	3.65934	11.36	2.38e-10	1.22e-07
240161_s_at	CDC20B	Cell division cycle 20 homolog B (S. cerevisiae)	166979	3.79415	15.495	7.42e-13	1.53e-09
207307_at	HTR2C	5-hydroxytryptamine (serotonin) receptor 2C	3358	4.61486	13.0708	1.83e-11	1.97e-08

## Sheet: Table S3E_Thalidomide 10μM
Probe Set ID	Gene Symbol	Gene Title	Entrez Gene ID	Linear Fold change	t	P.Value	adj.P.Val
219466_s_at	APOA2	apolipoprotein A-II	336	-7.14586	-16.6151	1.94e-13	3.73e-10
205649_s_at	FGA	fibrinogen alpha chain	2243	-6.75058	-25.4979	4.13e-17	6.65e-13
216238_s_at	FGB	fibrinogen beta chain	2244	-6.48597	-7.23154	4.37e-07	2.78e-05
219465_at	APOA2	apolipoprotein A-II	336	-6.47526	-11.7453	1.3e-10	5.45e-08
219612_s_at	FGG	fibrinogen gamma chain	2266	-6.10953	-20.5891	2.93e-15	1.57e-11
205892_s_at	FABP1	fatty acid binding protein 1, liver	2168	-6.06936	-12.865	2.46e-11	1.65e-08
204988_at	FGB	fibrinogen beta chain	2244	-6.05738	-21.2088	1.63e-15	1.54e-11
209960_at	HGF	hepatocyte growth factor (hepapoietin A; scatter factor)	3082	-5.71683	-17.3118	8.77e-14	2.35e-10
219823_at	LIN28	lin-28 homolog (C. elegans)	79727	-5.20343	-21.0353	1.92e-15	1.54e-11
210929_s_at	AHSG /// LOC100131613	alpha-2-HS-glycoprotein /// PRO1454	100131613 /// 197	-5.07732	-12.2074	6.46e-11	3.29e-08
204114_at	NID2	nidogen 2 (osteonidogen)	22795	-4.6306	-25.6099	3.78e-17	6.65e-13
207717_s_at	PKP2	plakophilin 2	5318	-4.582	-9.05974	1.21e-08	1.82e-06
219140_s_at	RBP4	retinol binding protein 4, plasma	5950	-4.29607	-9.32283	7.47e-09	1.26e-06
204694_at	AFP	alpha-fetoprotein	174	-4.20239	-20.6489	2.77e-15	1.57e-11
205650_s_at	FGA	fibrinogen alpha chain	2243	-4.17662	-19.1721	1.19e-14	4.83e-11
210258_at	RGS13	regulator of G-protein signaling 13	6003	-4.13304	-13.3493	1.24e-11	9.98e-09
200606_at	DSP	desmoplakin	1832	-4.12151	-14.9024	1.56e-12	1.8e-09
205820_s_at	APOC3	apolipoprotein C-III	345	-4.02547	-9.61988	4.38e-09	8.4e-07
236892_s_at	LOC100130740	similar to hCG2042068	100130740	-3.87059	-17.8892	4.63e-14	1.66e-10
201131_s_at	CDH1	cadherin 1, type 1, E-cadherin (epithelial)	999	-3.7016	-10.0747	1.98e-09	4.76e-07
230964_at	FREM2	FRAS1 related extracellular matrix protein 2	341640	-3.63236	-11.8223	1.16e-10	5.11e-08
201578_at	PODXL	podocalyxin-like	5420	-3.61034	-17.7779	5.23e-14	1.68e-10
201650_at	KRT19	keratin 19	3880	-3.59171	-15.3473	8.92e-13	1.25e-09
227361_at	HS3ST3B1	heparan sulfate (glucosamine) 3-O-sulfotransferase 3B1	9953	-3.54322	-10.667	7.29e-10	2.24e-07
205108_s_at	APOB	apolipoprotein B (including Ag(x) antigen)	338	-3.53542	-11.3927	2.26e-10	8.76e-08
202833_s_at	SERPINA1	serpin peptidase inhibitor, clade A (alpha-1 antiproteinase, antitrypsin), member 1	5265	-3.47882	-5.42806	2.31e-05	0.000523987
209905_at	HOXA9	homeobox A9	3205	-3.469	-15.1599	1.13e-12	1.4e-09
213998_s_at	DDX17	DEAD (Asp-Glu-Ala-Asp) box polypeptide 17	10521	-3.4664	-5.65138	1.38e-05	0.000354536
213258_at	TFPI	tissue factor pathway inhibitor (lipoprotein-associated coagulation inhibitor)	7035	-3.395	-12.771	2.82e-11	1.81e-08
230865_at	LIX1	Lix1 homolog (chicken)	167410	-3.28515	-11.6891	1.42e-10	5.87e-08
210665_at	TFPI	tissue factor pathway inhibitor (lipoprotein-associated coagulation inhibitor)	7035	-3.23431	-7.58994	2.09e-07	1.6e-05
201839_s_at	EPCAM	epithelial cell adhesion molecule	4072	-3.12238	-12.5136	4.1e-11	2.37e-08
204450_x_at	APOA1	apolipoprotein A-I	335	-3.09597	-7.33894	3.5e-07	2.34e-05
210282_at	ZMYM2	zinc finger, MYM-type 2	7750	-3.08999	-4.03015	0.000619644	0.00608199
210664_s_at	TFPI	tissue factor pathway inhibitor (lipoprotein-associated coagulation inhibitor)	7035	-3.08336	-16.1901	3.2e-13	5.42e-10
212812_at	---	---	---	-3.06747	-15.456	7.79e-13	1.14e-09
217901_at	DSG2	desmoglein 2	1829	-3.00013	-16.5546	2.08e-13	3.73e-10
230319_at	---	---	---	-2.99564	-7.95613	9.99e-08	9.07e-06
206742_at	FIGF	c-fos induced growth factor (vascular endothelial growth factor D)	2277	-2.96056	-12.5643	3.81e-11	2.27e-08
205919_at	HBE1	hemoglobin, epsilon 1	3046	-2.92936	-12.3374	5.32e-11	2.9e-08
241060_x_at	---	---	---	-2.92081	-4.12074	0.000499704	0.00516778
206893_at	SALL1	sal-like 1 (Drosophila)	6299	-2.91474	-8.702	2.35e-08	2.93e-06
243233_at	---	---	---	-2.91278	-3.66048	0.00148694	0.0113823
229273_at	SALL1	sal-like 1 (Drosophila)	6299	-2.91063	-8.77847	2.04e-08	2.6e-06
226847_at	FST	follistatin	10468	-2.90945	-15.4734	7.63e-13	1.14e-09
202007_at	NID1	nidogen 1	4811	-2.899	-8.49044	3.52e-08	4.02e-06
229178_at	PRTG	protogenin homolog (Gallus gallus)	283659	-2.89352	-14.4675	2.74e-12	2.94e-09
213067_at	MYH10	myosin, heavy chain 10, non-muscle	4628	-2.88397	-3.98114	0.000696084	0.00663412
202499_s_at	SLC2A3	solute carrier family 2 (facilitated glucose transporter), member 3	6515	-2.86648	-11.8475	1.11e-10	5.05e-08
210002_at	GATA6	GATA binding protein 6	2627	-2.85201	-9.89017	2.73e-09	6.13e-07
203642_s_at	COBLL1	COBL-like 1	22837	-2.83544	-9.34963	7.11e-09	1.22e-06
201085_s_at	SON	SON DNA binding protein	6651	-2.83259	-2.78013	0.0113183	0.0489847
225911_at	NPNT	nephronectin	255743	-2.79961	-8.16769	6.58e-08	6.56e-06
210095_s_at	IGFBP3	insulin-like growth factor binding protein 3	3486	-2.78163	-17.059	1.17e-13	2.89e-10
223044_at	SLC40A1	solute carrier family 40 (iron-regulated transporter), member 1	30061	-2.72478	-9.61588	4.42e-09	8.41e-07
243161_x_at	ZFP42	zinc finger protein 42 homolog (mouse)	132625	-2.72287	-9.93857	2.51e-09	5.76e-07
225239_at	---	---	---	-2.69359	-9.75833	3.43e-09	7.24e-07
229073_at	PRTG	protogenin homolog (Gallus gallus)	283659	-2.69292	-10.6688	7.27e-10	2.24e-07
242352_at	NIPBL	Nipped-B homolog (Drosophila)	25836	-2.68601	-3.38152	0.00286155	0.0182807
214651_s_at	HOXA9	homeobox A9	3205	-2.67983	-11.296	2.63e-10	9.76e-08
204731_at	TGFBR3	transforming growth factor, beta receptor III	7049	-2.67806	-7.53049	2.36e-07	1.74e-05
231310_at	---	---	---	-2.652	-17.5657	6.61e-14	1.93e-10
1569512_at	---	---	---	-2.65199	-7.48257	2.6e-07	1.86e-05
208610_s_at	SRRM2	serine/arginine repetitive matrix 2	23524	-2.65031	-3.21265	0.00423545	0.0243031
206894_at	APOA4	apolipoprotein A-IV	337	-2.64215	-10.6621	7.35e-10	2.24e-07
212188_at	KCTD12	potassium channel tetramerisation domain containing 12	115207	-2.62188	-5.81924	9.45e-06	0.000266775
220116_at	KCNN2	potassium intermediate/small conductance calcium-activated channel, subfamily N, member 2	3781	-2.61989	-10.5066	9.52e-10	2.64e-07
201438_at	COL6A3	collagen, type VI, alpha 3	1293	-2.61109	-13.0377	1.92e-11	1.35e-08
208892_s_at	DUSP6	dual specificity phosphatase 6	1848	-2.58477	-13.2269	1.47e-11	1.13e-08
214146_s_at	PPBP	pro-platelet basic protein (chemokine (C-X-C motif) ligand 7)	5473	-2.58448	-11.7716	1.25e-10	5.37e-08
217234_s_at	EZR	ezrin	7430	-2.5647	-2.83364	0.010043	0.0449264
226817_at	DSC2	desmocollin 2	1824	-2.56402	-7.75737	1.49e-07	1.23e-05
206432_at	HAS2	hyaluronan synthase 2	3037	-2.54356	-7.19418	4.72e-07	2.93e-05
241955_at	HECTD1	HECT domain containing 1	25831	-2.52074	-3.82773	0.00100143	0.00864815
224833_at	ETS1	v-ets erythroblastosis virus E26 oncogene homolog 1 (avian)	2113	-2.5145	-13.7361	7.27e-12	6.69e-09
242918_at	NASP	Nuclear autoantigenic sperm protein (histone-binding)	4678	-2.51163	-2.95845	0.00758029	0.0366046
1552487_a_at	BNC1	basonuclin 1	646	-2.49875	-7.00836	6.98e-07	3.88e-05
220138_at	HAND1	heart and neural crest derivatives expressed 1	9421	-2.49646	-9.09184	1.14e-08	1.74e-06
219682_s_at	TBX3	T-box 3	6926	-2.47739	-9.74279	3.53e-09	7.33e-07
212143_s_at	IGFBP3	insulin-like growth factor binding protein 3	3486	-2.47055	-15.0812	1.24e-12	1.48e-09
214577_at	MAP1B	microtubule-associated protein 1B	4131	-2.46676	-3.75423	0.00119164	0.00976481
209815_at	PTCH1	patched homolog 1 (Drosophila)	5727	-2.46377	-12.8357	2.57e-11	1.69e-08
217073_x_at	APOA1	apolipoprotein A-I	335	-2.45668	-8.11045	7.37e-08	7.1e-06
207761_s_at	METTL7A	methyltransferase like 7A	25840	-2.45445	-12.0463	8.23e-11	3.9e-08
213515_x_at	HBG1 /// HBG2	hemoglobin, gamma A /// hemoglobin, gamma G	3047 /// 3048	-2.44657	-12.0773	7.85e-11	3.77e-08
231735_s_at	MALAT1	metastasis associated lung adenocarcinoma transcript 1 (non-protein coding)	378938	-2.41935	-3.29962	0.00346255	0.0209444
201927_s_at	PKP4	plakophilin 4	8502	-2.40133	-3.61605	0.00165113	0.0122789
205523_at	HAPLN1	hyaluronan and proteoglycan link protein 1	1404	-2.39119	-13.8771	6e-12	5.86e-09
201505_at	LAMB1	laminin, beta 1	3912	-2.38792	-8.8457	1.8e-08	2.37e-06
243857_at	MORF4L2	Mortality factor 4 like 2	9643	-2.3844	-3.94591	0.000756773	0.00704368
202409_at	IGF2 /// INS-IGF2	insulin-like growth factor 2 (somatomedin A) /// INS-IGF2 readthrough transcript	3481 /// 723961	-2.37257	-4.78094	0.000104558	0.00160418
227884_at	TAF15	TAF15 RNA polymerase II, TATA box binding protein (TBP)-associated factor, 68kDa	8148	-2.37223	-5.39859	2.47e-05	0.000548869
228481_at	---	---	---	-2.3715	-5.56663	1.68e-05	0.000412452
213150_at	HOXA10	homeobox A10	3206	-2.37141	-7.75668	1.49e-07	1.23e-05
209220_at	GPC3	glypican 3	2719	-2.35964	-16.6819	1.8e-13	3.73e-10
200607_s_at	RAD21	RAD21 homolog (S. pombe)	5885	-2.35822	-5.67349	1.32e-05	0.000341009
201641_at	BST2	bone marrow stromal cell antigen 2	684	-2.35783	-9.66101	4.08e-09	8.05e-07
230895_at	HAPLN1	hyaluronan and proteoglycan link protein 1	1404	-2.35155	-8.73569	2.21e-08	2.78e-06
227152_at	C12orf35	chromosome 12 open reading frame 35	55196	-2.34425	-3.45076	0.00243407	0.0163068
230960_at	IGDCC3	immunoglobulin superfamily, DCC subclass, member 3	9543	-2.33772	-12.0993	7.59e-11	3.71e-08
209875_s_at	SPP1	secreted phosphoprotein 1	6696	-2.32501	-15.2345	1.03e-12	1.38e-09
205466_s_at	HS3ST1	heparan sulfate (glucosamine) 3-O-sulfotransferase 1	9957	-2.32246	-9.05434	1.22e-08	1.82e-06
203887_s_at	THBD	thrombomodulin	7056	-2.3177	-6.89262	8.93e-07	4.65e-05
227947_at	PHACTR2	phosphatase and actin regulator 2	9749	-2.30982	-9.75278	3.47e-09	7.25e-07
211074_at	FOLR1	folate receptor 1 (adult)	2348	-2.30595	-4.08489	0.000544118	0.00551235
212027_at	RBM25	RNA binding motif protein 25	58517	-2.30177	-3.2998	0.00346115	0.0209416
223000_s_at	F11R	F11 receptor	50848	-2.29063	-12.3121	5.52e-11	2.94e-08
207558_s_at	PITX2	paired-like homeodomain 2	5308	-2.28682	-15.1648	1.12e-12	1.4e-09
226582_at	LOC400043	hypothetical LOC400043	400043	-2.28659	-11.9227	9.93e-11	4.57e-08
210512_s_at	VEGFA	vascular endothelial growth factor A	7422	-2.28234	-13.4683	1.05e-11	8.67e-09
205472_s_at	DACH1	dachshund homolog 1 (Drosophila)	1602	-2.2764	-3.88863	0.000866891	0.00776561
227297_at	ITGA9	integrin, alpha 9	3680	-2.27572	-8.46644	3.69e-08	4.12e-06
204324_s_at	GOLIM4	golgi integral membrane protein 4	27333	-2.26909	-3.87139	0.000903026	0.0079937
206286_s_at	TDGF1 /// TDGF3	teratocarcinoma-derived growth factor 1 /// teratocarcinoma-derived growth factor 3, pseudogene	6997 /// 6998	-2.26812	-10.5767	8.47e-10	2.48e-07
203706_s_at	FZD7	frizzled homolog 7 (Drosophila)	8324	-2.26043	-9.58753	4.64e-09	8.64e-07
237491_at	---	---	---	-2.25493	-10.6701	7.25e-10	2.24e-07
205862_at	GREB1	GREB1 protein	9687	-2.24833	-10.8962	5e-10	1.66e-07
203382_s_at	APOE	apolipoprotein E	348	-2.24749	-11.799	1.2e-10	5.22e-08
220462_at	CSRNP3	cysteine-serine-rich nuclear protein 3	80034	-2.24686	-2.94166	0.00787424	0.0376357
231061_at	---	---	---	-2.2434	-6.11164	4.9e-06	0.000163692
209723_at	SERPINB9	serpin peptidase inhibitor, clade B (ovalbumin), member 9	5272	-2.24286	-13.9186	5.67e-12	5.77e-09
200872_at	S100A10	S100 calcium binding protein A10	6281	-2.23423	-8.88754	1.66e-08	2.27e-06
230372_at	HAS2	Hyaluronan synthase 2	3037	-2.22374	-6.86925	9.38e-07	4.83e-05
203698_s_at	FRZB	frizzled-related protein	2487	-2.2187	-13.2735	1.38e-11	1.08e-08
202856_s_at	SLC16A3	solute carrier family 16, member 3 (monocarboxylic acid transporter 4)	9123	-2.2178	-8.12379	7.18e-08	6.98e-06
204419_x_at	HBG1 /// HBG2	hemoglobin, gamma A /// hemoglobin, gamma G	3047 /// 3048	-2.21749	-9.19213	9.47e-09	1.49e-06
201250_s_at	SLC2A1	solute carrier family 2 (facilitated glucose transporter), member 1	6513	-2.21719	-13.4862	1.02e-11	8.67e-09
210281_s_at	ZMYM2	zinc finger, MYM-type 2	7750	-2.21516	-3.59547	0.00173308	0.0127203
215169_at	SLC35E2	solute carrier family 35, member E2	9906	-2.21201	-3.60271	0.00170382	0.0125617
203697_at	FRZB	frizzled-related protein	2487	-2.21176	-12.9454	2.19e-11	1.5e-08
228455_at	RBM15	RNA binding motif protein 15	64783	-2.20858	-5.38862	2.53e-05	0.000558571
202082_s_at	SEC14L1	SEC14-like 1 (S. cerevisiae)	6397	-2.20792	-5.58761	1.6e-05	0.000397343
209047_at	AQP1	aquaporin 1 (Colton blood group)	358	-2.20161	-8.06546	8.05e-08	7.65e-06
208891_at	DUSP6	dual specificity phosphatase 6	1848	-2.20032	-8.85588	1.76e-08	2.36e-06
203628_at	IGF1R	insulin-like growth factor 1 receptor	3480	-2.19519	-7.62897	1.93e-07	1.51e-05
203910_at	ARHGAP29	Rho GTPase activating protein 29	9411	-2.19408	-6.36804	2.78e-06	0.000105608
229661_at	SALL4	sal-like 4 (Drosophila)	57167	-2.19191	-10.3854	1.17e-09	3.11e-07
243683_at	MORF4L2	Mortality factor 4 like 2	9643	-2.18986	-3.93695	0.000773037	0.00716606
226452_at	PDK1	pyruvate dehydrogenase kinase, isozyme 1	5163	-2.18711	-6.29128	3.29e-06	0.000120509
212298_at	NRP1	neuropilin 1	8829	-2.18457	-5.18175	4.09e-05	0.000795953
242890_at	---	---	---	-2.18317	-11.3493	2.42e-10	9.27e-08
212079_s_at	MLL	myeloid/lymphoid or mixed-lineage leukemia (trithorax homolog, Drosophila)	4297	-2.18128	-3.65132	0.00151942	0.0115486
221558_s_at	LEF1	lymphoid enhancer-binding factor 1	51176	-2.18076	-11.2804	2.7e-10	9.76e-08
222088_s_at	SLC2A14 /// SLC2A3	solute carrier family 2 (facilitated glucose transporter), member 14 /// solute carrier family 2 (facilitated glucose transporter), member 3	144195 /// 6515	-2.17315	-9.38999	6.61e-09	1.15e-06
221718_s_at	AKAP13	A kinase (PRKA) anchor protein 13	11214	-2.17048	-5.62986	1.45e-05	0.000368126
231999_at	ANKRD11	ankyrin repeat domain 11	29123	-2.16321	-2.77476	0.0114546	0.0493623
1567458_s_at	RAC1	ras-related C3 botulinum toxin substrate 1 (rho family, small GTP binding protein Rac1)	5879	-2.16042	-6.9481	7.93e-07	4.3e-05
210198_s_at	PLP1	proteolipid protein 1	5354	-2.14694	-5.97948	6.59e-06	0.000202721
237449_at	SP8	Sp8 transcription factor	221833	-2.13999	-6.94775	7.94e-07	4.3e-05
229346_at	NES	nestin	10763	-2.1383	-2.86495	0.00936164	0.0427089
229797_at	MCOLN3	mucolipin 3	55283	-2.13813	-5.90336	7.82e-06	0.000231547
227497_at	SOX6	SRY (sex determining region Y)-box 6	55553	-2.13645	-9.33414	7.32e-09	1.24e-06
213506_at	F2RL1	coagulation factor II (thrombin) receptor-like 1	2150	-2.13488	-7.11452	5.58e-07	3.29e-05
222162_s_at	ADAMTS1	ADAM metallopeptidase with thrombospondin type 1 motif, 1	9510	-2.12537	-8.38893	4.28e-08	4.63e-06
201349_at	SLC9A3R1	solute carrier family 9 (sodium/hydrogen exchanger), member 3 regulator 1	9368	-2.11837	-9.3175	7.54e-09	1.26e-06
206104_at	ISL1	ISL LIM homeobox 1	3670	-2.11794	-7.38094	3.21e-07	2.22e-05
207002_s_at	PLAGL1	pleiomorphic adenoma gene-like 1	5325	-2.11169	-11.3947	2.25e-10	8.76e-08
242068_at	---	---	---	-2.10955	-4.14344	0.000473469	0.00496988
224851_at	CDK6	cyclin-dependent kinase 6	1021	-2.10677	-5.79526	9.98e-06	0.000277294
1554447_at	LOC554203	alanyl-tRNA synthetase domain containing 1 pseudogene	554203	-2.10508	-3.87356	0.000898397	0.00796147
203705_s_at	FZD7	frizzled homolog 7 (Drosophila)	8324	-2.105	-9.04648	1.24e-08	1.84e-06
209006_s_at	C1orf63	chromosome 1 open reading frame 63	57035	-2.10322	-4.1651	0.000449726	0.00477986
203304_at	BAMBI	BMP and activin membrane-bound inhibitor homolog (Xenopus laevis)	25805	-2.10041	-13.1768	1.58e-11	1.15e-08
222313_at	---	---	---	-2.0981	-4.00681	0.000654945	0.0063368
240259_at	FLRT2	Fibronectin leucine rich transmembrane protein 2	23768	-2.09721	-6.35848	2.84e-06	0.000107093
201427_s_at	SEPP1	selenoprotein P, plasma, 1	6414	-2.08947	-8.6211	2.74e-08	3.32e-06
203074_at	ANXA8 /// ANXA8L1 /// ANXA8L2	annexin A8 /// annexin A8-like 1 /// annexin A8-like 2	244 /// 653145 /// 728113	-2.08778	-8.41333	4.08e-08	4.52e-06
202669_s_at	EFNB2	ephrin-B2	1948	-2.08457	-3.13227	0.00509743	0.0276174
209630_s_at	FBXW2	F-box and WD repeat domain containing 2	26190	-2.07972	-8.03905	8.48e-08	8.01e-06
209281_s_at	ATP2B1	ATPase, Ca++ transporting, plasma membrane 1	490	-2.07761	-4.34058	0.000296461	0.00351776
226213_at	ERBB3	v-erb-b2 erythroblastic leukemia viral oncogene homolog 3 (avian)	2065	-2.07663	-14.87	1.63e-12	1.81e-09
220295_x_at	DEPDC1	DEP domain containing 1	55635	-2.0729	-3.35044	0.00307652	0.0192519
202934_at	HK2	hexokinase 2	3099	-2.07204	-10.0109	2.21e-09	5.2e-07
204048_s_at	PHACTR2	phosphatase and actin regulator 2	9749	-2.07138	-10.5368	9.05e-10	2.56e-07
213593_s_at	TRA2A	transformer 2 alpha homolog (Drosophila)	29896	-2.07068	-4.25543	0.000362883	0.00408754
202660_at	ITPR2	inositol 1,4,5-triphosphate receptor, type 2	3709	-2.06922	-5.79008	1.01e-05	0.000279842
221730_at	COL5A2	collagen, type V, alpha 2	1290	-2.06809	-9.77288	3.35e-09	7.23e-07
229765_at	ZNF207	zinc finger protein 207	7756	-2.06624	-3.26669	0.00373748	0.0221416
1554012_at	RSPO2	R-spondin 2 homolog (Xenopus laevis)	340419	-2.06443	-5.24359	3.54e-05	0.000716653
205374_at	SLN	sarcolipin	6588	-2.0564	-9.40387	6.45e-09	1.13e-06
203386_at	TBC1D4	TBC1 domain family, member 4	9882	-2.05629	-6.63626	1.55e-06	6.88e-05
225899_x_at	FLJ45445 /// LOC643670 /// LOC728105 /// tcag7.907	hypothetical LOC399844 /// similar to hCG1739109 /// similar to hCG1739109 /// hypothetical LOC402483	399844 /// 402483 /// 643670 /// 728105	-2.05274	-12.1883	6.64e-11	3.29e-08
231268_at	LOC645895 /// MYBL1	hypothetical LOC645895 /// v-myb myeloblastosis viral oncogene homolog (avian)-like 1	4603 /// 645895	-2.04835	-7.26982	4.03e-07	2.61e-05
212464_s_at	FN1	fibronectin 1	2335	-2.04667	-13.9113	5.73e-12	5.77e-09
209318_x_at	PLAGL1	pleiomorphic adenoma gene-like 1	5325	-2.04516	-10.9441	4.63e-10	1.57e-07
244846_at	---	---	---	-2.04323	-3.28789	0.00355812	0.02137
210220_at	FZD2	frizzled homolog 2 (Drosophila)	2535	-2.04313	-6.67692	1.42e-06	6.45e-05
208096_s_at	COL21A1	collagen, type XXI, alpha 1	81578	-2.04027	-7.15815	5.09e-07	3.08e-05
203803_at	PCYOX1	prenylcysteine oxidase 1	51449	-2.03945	-5.01138	6.08e-05	0.00106845
226834_at	---	---	---	-2.03712	-11.201	3.06e-10	1.09e-07
212520_s_at	SMARCA4	SWI/SNF related, matrix associated, actin dependent regulator of chromatin, subfamily a, member 4	6597	-2.03534	-3.78278	0.00111386	0.0093171
208975_s_at	KPNB1	karyopherin (importin) beta 1	3837	-2.03216	-8.93538	1.52e-08	2.14e-06
212382_at	TCF4	transcription factor 4	6925	-2.03144	-4.79735	0.000100592	0.00155595
211993_at	WNK1	WNK lysine deficient protein kinase 1	65125	-2.0303	-5.15053	4.4e-05	0.000843733
1553993_s_at	MED25	mediator complex subunit 25	81857	-2.02947	-11.2933	2.64e-10	9.76e-08
236163_at	LIX1	Lix1 homolog (chicken)	167410	-2.02547	-10.8163	5.7e-10	1.84e-07
240971_x_at	---	---	---	-2.02412	-4.48912	0.00020842	0.00270425
232055_at	SFXN1	sideroflexin 1	94081	-2.02315	-5.34222	2.82e-05	0.000606005
205559_s_at	PCSK5	proprotein convertase subtilisin/kexin type 5	5125	-2.02256	-8.47657	3.62e-08	4.06e-06
236031_x_at	---	---	---	-2.01326	-7.35694	3.37e-07	2.29e-05
238651_at	---	---	---	-2.0107	-4.36757	0.000278063	0.00336139
204463_s_at	EDNRA	endothelin receptor type A	1909	-2.01039	-3.77274	0.00114061	0.00945247
222587_s_at	GALNT7	UDP-N-acetyl-alpha-D-galactosamine:polypeptide N-acetylgalactosaminyltransferase 7 (GalNAc-T7)	51809	-2.00872	-3.72351	0.00128141	0.0102678
241885_at	---	---	---	-2.0078	-4.6123	0.000155696	0.00216028
213428_s_at	COL6A1	collagen, type VI, alpha 1	1291	-2.00561	-11.822	1.16e-10	5.11e-08
34031_i_at	KRIT1	KRIT1, ankyrin repeat containing	889	-2.00534	-3.15812	0.00480309	0.0265133
1556054_at	---	---	---	-2.00411	-5.26211	3.39e-05	0.000695219
204416_x_at	APOC1	apolipoprotein C-I	341	-2.00242	-7.58449	2.11e-07	1.61e-05
209278_s_at	TFPI2	tissue factor pathway inhibitor 2	7980	2.03301	8.57581	2.99e-08	3.54e-06
201163_s_at	IGFBP7	insulin-like growth factor binding protein 7	3490	2.04191	13.1672	1.6e-11	1.15e-08
237282_s_at	AKAP14	A kinase (PRKA) anchor protein 14	158798	2.11898	10.6388	7.64e-10	2.28e-07
238047_at	RP13-102H20.1	hypothetical protein FLJ30058	158763	2.12573	8.24551	5.65e-08	5.78e-06
229057_at	SCN2A	sodium channel, voltage-gated, type II, alpha subunit	6326	2.15189	6.12328	4.77e-06	0.000160833
206552_s_at	TAC1	tachykinin, precursor 1	6863	2.18803	16.6026	1.97e-13	3.73e-10
204222_s_at	GLIPR1	GLI pathogenesis-related 1	11010	2.25737	7.92721	1.06e-07	9.47e-06
205549_at	PCP4	Purkinje cell protein 4	5121	2.26439	12.6665	3.28e-11	2.03e-08
201645_at	TNC	tenascin C	3371	2.2931	16.9487	1.32e-13	3.04e-10
206172_at	IL13RA2	interleukin 13 receptor, alpha 2	3598	2.30835	10.5441	8.94e-10	2.55e-07
231077_at	C1orf192	chromosome 1 open reading frame 192	257177	2.34336	12.1901	6.63e-11	3.29e-08
227140_at	---	---	---	2.36059	5.69747	1.25e-05	0.000327085
235342_at	SPOCK3	sparc/osteonectin, cwcv and kazal-like domains proteoglycan (testican) 3	50859	2.37676	5.58604	1.61e-05	0.000397956
241998_at	C2orf80	chromosome 2 open reading frame 80	389073	2.42449	8.91189	1.59e-08	2.2e-06
206339_at	CARTPT	CART prepropeptide	9607	2.44298	9.82522	3.05e-09	6.69e-07
216929_x_at	ABO	ABO blood group (transferase A, alpha 1-3-N-acetylgalactosaminyltransferase; transferase B, alpha 1-3-galactosyltransferase)	28	2.44902	8.21124	6.05e-08	6.12e-06
218706_s_at	GRAMD3	GRAM domain containing 3	65983	2.55651	9.26555	8.29e-09	1.35e-06
237281_at	AKAP14	A kinase (PRKA) anchor protein 14	158798	2.63107	8.61537	2.77e-08	3.33e-06
203824_at	TSPAN8	tetraspanin 8	7103	2.66682	15.9942	4.04e-13	6.51e-10
1553126_a_at	SLC39A12	solute carrier family 39 (zinc transporter), member 12	221074	2.78383	8.96543	1.44e-08	2.07e-06
225664_at	COL12A1	collagen, type XII, alpha 1	1303	2.8526	9.70259	3.79e-09	7.58e-07
240161_s_at	CDC20B	Cell division cycle 20 homolog B (S. cerevisiae)	166979	3.27677	13.7915	6.74e-12	6.38e-09
207307_at	HTR2C	5-hydroxytryptamine (serotonin) receptor 2C	3358	3.69965	11.1815	3.16e-10	1.11e-07
206439_at	EPYC	epiphycan	1833	4.71969	19.167	1.2e-14	4.83e-11

## Sheet: Table S3F_Thalidomide 70μM
Probe Set ID	Gene Symbol	Gene Title	Entrez Gene ID	Linear Fold change	t	P.Value	adj.P.Val
209905_at	HOXA9	homeobox A9	3205	-13.5804	-31.7931	4.8e-19	3.86e-15
204694_at	AFP	alpha-fetoprotein	174	-11.681	-35.3527	5.54e-20	8.93e-16
204988_at	FGB	fibrinogen beta chain	2244	-11.1185	-28.3598	4.85e-18	1.95e-14
225911_at	NPNT	nephronectin	255743	-10.593	-18.7253	1.9e-14	1.04e-11
219466_s_at	APOA2	apolipoprotein A-II	336	-10.5022	-19.8684	5.92e-15	3.74e-12
214651_s_at	HOXA9	homeobox A9	3205	-10.2633	-26.6838	1.66e-17	4.44e-14
207558_s_at	PITX2	paired-like homeodomain 2	5308	-9.33827	-40.9593	2.75e-21	8.85e-17
209960_at	HGF	hepatocyte growth factor (hepapoietin A; scatter factor)	3082	-9.33495	-22.181	6.69e-16	7.99e-13
219612_s_at	FGG	fibrinogen gamma chain	2266	-9.29121	-25.3582	4.61e-17	8.74e-14
219465_at	APOA2	apolipoprotein A-II	336	-9.07033	-13.8644	6.11e-12	1.06e-09
216238_s_at	FGB	fibrinogen beta chain	2244	-8.53161	-8.29186	5.17e-08	1.72e-06
205649_s_at	FGA	fibrinogen alpha chain	2243	-8.39643	-28.4111	4.67e-18	1.95e-14
210002_at	GATA6	GATA binding protein 6	2627	-8.29997	-19.971	5.35e-15	3.52e-12
210929_s_at	AHSG /// LOC100131613	alpha-2-HS-glycoprotein /// PRO1454	100131613 /// 197	-8.22051	-15.8276	4.94e-13	1.46e-10
236141_at	NBLA00301	Nbla00301	79804	-7.92086	-17.885	4.65e-14	2.05e-11
219387_at	CCDC88A	coiled-coil domain containing 88A	55704	-7.69078	-4.1486	0.000467709	0.00289099
207717_s_at	PKP2	plakophilin 2	5318	-7.67485	-12.1299	7.25e-11	7.94e-09
208900_s_at	TOP1	topoisomerase (DNA) I	7150	-7.67238	-3.73072	0.00125975	0.00639428
200606_at	DSP	desmoplakin	1832	-7.60541	-21.349	1.43e-15	1.28e-12
201578_at	PODXL	podocalyxin-like	5420	-7.32832	-27.5813	8.5e-18	2.74e-14
236892_s_at	LOC100130740	similar to hCG2042068	100130740	-7.25182	-26.1881	2.41e-17	5.98e-14
205892_s_at	FABP1	fatty acid binding protein 1, liver	2168	-6.99589	-13.8786	5.99e-12	1.05e-09
230865_at	LIX1	Lix1 homolog (chicken)	167410	-6.88844	-18.9658	1.48e-14	8.35e-12
223044_at	SLC40A1	solute carrier family 40 (iron-regulated transporter), member 1	30061	-6.62564	-18.1398	3.53e-14	1.69e-11
205650_s_at	FGA	fibrinogen alpha chain	2243	-6.45907	-25.0193	6.04e-17	1.08e-13
202833_s_at	SERPINA1	serpin peptidase inhibitor, clade A (alpha-1 antiproteinase, antitrypsin), member 1	5265	-6.17211	-7.9244	1.06e-07	3.14e-06
206858_s_at	HOXC6	homeobox C6	3223	-6.15622	-21.1821	1.67e-15	1.39e-12
209335_at	DCN	decorin	1634	-5.97667	-15.3109	9.33e-13	2.33e-10
226847_at	FST	follistatin	10468	-5.9097	-25.7406	3.41e-17	7.75e-14
205523_at	HAPLN1	hyaluronan and proteoglycan link protein 1	1404	-5.70914	-27.7301	7.63e-18	2.73e-14
213998_s_at	DDX17	DEAD (Asp-Glu-Ala-Asp) box polypeptide 17	10521	-5.59734	-7.82977	1.29e-07	3.64e-06
210258_at	RGS13	regulator of G-protein signaling 13	6003	-5.5152	-16.0633	3.72e-13	1.18e-10
1563881_at	---	---	---	-5.50862	-5.30248	3.09e-05	0.000321052
203477_at	COL15A1	collagen, type XV, alpha 1	1306	-5.43171	-22.7503	4.04e-16	5.42e-13
205108_s_at	APOB	apolipoprotein B (including Ag(x) antigen)	338	-5.40688	-15.2255	1.04e-12	2.55e-10
210282_at	ZMYM2	zinc finger, MYM-type 2	7750	-5.35476	-5.99426	6.37e-06	8.9e-05
205472_s_at	DACH1	dachshund homolog 1 (Drosophila)	1602	-5.29225	-7.87679	1.17e-07	3.4e-06
201131_s_at	CDH1	cadherin 1, type 1, E-cadherin (epithelial)	999	-5.27296	-12.7984	2.71e-11	3.6e-09
215290_at	---	---	---	-5.20148	-6.04931	5.63e-06	8.04e-05
205694_at	TYRP1	tyrosinase-related protein 1	7306	-5.09184	-19.9222	5.62e-15	3.62e-12
219140_s_at	RBP4	retinol binding protein 4, plasma	5950	-5.08494	-10.401	1.14e-09	7.87e-08
205820_s_at	APOC3	apolipoprotein C-III	345	-5.08286	-11.231	2.92e-10	2.54e-08
201085_s_at	SON	SON DNA binding protein	6651	-5.08126	-4.34048	0.000296527	0.00199819
230964_at	FREM2	FRAS1 related extracellular matrix protein 2	341640	-5.04763	-14.838	1.7e-12	3.71e-10
200598_s_at	HSP90B1	heat shock protein 90kDa beta (Grp94), member 1	7184	-5.02726	-6.78539	1.12e-06	2.16e-05
204450_x_at	APOA1	apolipoprotein A-I	335	-4.90818	-10.3314	1.28e-09	8.52e-08
242352_at	NIPBL	Nipped-B homolog (Drosophila)	25836	-4.86815	-5.41668	2.37e-05	0.000259223
224851_at	CDK6	cyclin-dependent kinase 6	1021	-4.85668	-12.2908	5.7e-11	6.68e-09
243233_at	---	---	---	-4.66155	-5.27053	3.33e-05	0.000340675
208859_s_at	ATRX	alpha thalassemia/mental retardation syndrome X-linked (RAD54 homolog, S. cerevisiae)	546	-4.59761	-2.88699	0.00890877	0.0305438
207002_s_at	PLAGL1	pleiomorphic adenoma gene-like 1	5325	-4.5733	-23.1745	2.8e-16	4.5e-13
207983_s_at	STAG2	stromal antigen 2	10735	-4.56846	-7.95649	9.99e-08	2.99e-06
220138_at	HAND1	heart and neural crest derivatives expressed 1	9421	-4.55322	-15.0641	1.27e-12	2.95e-10
209318_x_at	PLAGL1	pleiomorphic adenoma gene-like 1	5325	-4.5036	-23.0189	3.2e-16	4.68e-13
203642_s_at	COBLL1	COBL-like 1	22837	-4.45668	-13.4064	1.14e-11	1.78e-09
200607_s_at	RAD21	RAD21 homolog (S. pombe)	5885	-4.43551	-9.85126	2.92e-09	1.69e-07
235874_at	PRSS35	protease, serine, 35	167681	-4.4316	-15.9525	4.25e-13	1.29e-10
229193_at	---	---	---	-4.35399	-7.11233	5.61e-07	1.22e-05
220462_at	CSRNP3	cysteine-serine-rich nuclear protein 3	80034	-4.35062	-5.34281	2.81e-05	0.000298702
201083_s_at	BCLAF1	BCL2-associated transcription factor 1	9774	-4.34841	-6.83145	1.02e-06	1.99e-05
239650_at	NAP5	Nck-associated protein 5	344148	-4.31099	-14.4693	2.73e-12	5.46e-10
205943_at	TDO2	tryptophan 2,3-dioxygenase	6999	-4.20704	-18.1288	3.57e-14	1.69e-11
208621_s_at	EZR	ezrin	7430	-4.19609	-3.64136	0.00155552	0.00760382
217234_s_at	EZR	ezrin	7430	-4.17549	-4.30002	0.000326426	0.00216123
209023_s_at	STAG2	stromal antigen 2	10735	-4.15171	-10.1467	1.75e-09	1.11e-07
202412_s_at	USP1	ubiquitin specific peptidase 1	7398	-4.09055	-8.29139	5.17e-08	1.72e-06
201291_s_at	TOP2A	topoisomerase (DNA) II alpha 170kDa	7153	-4.06596	-6.16693	4.33e-06	6.52e-05
229346_at	NES	nestin	10763	-4.05361	-5.27597	3.28e-05	0.000337702
213067_at	MYH10	myosin, heavy chain 10, non-muscle	4628	-4.01379	-5.22367	3.71e-05	0.000372495
211896_s_at	DCN	decorin	1634	-3.99097	-14.9267	1.51e-12	3.39e-10
203074_at	ANXA8 /// ANXA8L1 /// ANXA8L2	annexin A8 /// annexin A8-like 1 /// annexin A8-like 2	244 /// 653145 /// 728113	-3.94883	-15.6976	5.79e-13	1.62e-10
219978_s_at	NUSAP1	nucleolar and spindle associated protein 1	51203	-3.94575	-5.62166	1.48e-05	0.000175796
215768_at	---	---	---	-3.9325	-7.51654	2.43e-07	6.15e-06
213150_at	HOXA10	homeobox A10	3206	-3.9159	-12.2622	5.95e-11	6.82e-09
217901_at	DSG2	desmoglein 2	1829	-3.89662	-20.4942	3.21e-15	2.35e-12
217073_x_at	APOA1	apolipoprotein A-I	335	-3.89036	-12.2585	5.98e-11	6.82e-09
208610_s_at	SRRM2	serine/arginine repetitive matrix 2	23524	-3.874	-4.4639	0.00022126	0.00157992
219158_s_at	NARG1	NMDA receptor regulated 1	80155	-3.85246	-5.34115	2.82e-05	0.000299653
201893_x_at	DCN	decorin	1634	-3.79686	-18.1187	3.61e-14	1.69e-11
207943_x_at	PLAGL1	pleiomorphic adenoma gene-like 1	5325	-3.78746	-18.8863	1.6e-14	8.91e-12
226066_at	MITF	microphthalmia-associated transcription factor	4286	-3.78562	-11.5649	1.72e-10	1.62e-08
209281_s_at	ATP2B1	ATPase, Ca++ transporting, plasma membrane 1	490	-3.77692	-7.88853	1.14e-07	3.33e-06
220085_at	HELLS	helicase, lymphoid-specific	3070	-3.75817	-15.6064	6.47e-13	1.75e-10
206108_s_at	SFRS6	splicing factor, arginine/serine-rich 6	6431	-3.75748	-5.6404	1.42e-05	0.00017025
213844_at	HOXA5	homeobox A5	3202	-3.7369	-14.1873	3.96e-12	7.5e-10
242918_at	NASP	Nuclear autoantigenic sperm protein (histone-binding)	4678	-3.73486	-4.23309	0.000382665	0.00245339
206742_at	FIGF	c-fos induced growth factor (vascular endothelial growth factor D)	2277	-3.66726	-15.0423	1.31e-12	2.99e-10
222313_at	---	---	---	-3.63337	-6.97596	7.48e-07	1.55e-05
208096_s_at	COL21A1	collagen, type XXI, alpha 1	81578	-3.63131	-12.9454	2.19e-11	3.07e-09
200878_at	EPAS1	endothelial PAS domain protein 1	2034	-3.62037	-16.911	1.38e-13	5.23e-11
220295_x_at	DEPDC1	DEP domain containing 1	55635	-3.61842	-5.91096	7.68e-06	0.00010339
205609_at	ANGPT1	angiopoietin 1	284	-3.57487	-13.2234	1.48e-11	2.22e-09
203698_s_at	FRZB	frizzled-related protein	2487	-3.56578	-21.1762	1.68e-15	1.39e-12
221760_at	MAN1A1	Mannosidase, alpha, class 1A, member 1	4121	-3.53974	-13.5036	1e-11	1.59e-09
228477_at	ARGLU1	arginine and glutamate rich 1	55082	-3.51514	-8.44536	3.84e-08	1.35e-06
208930_s_at	ILF3	interleukin enhancer binding factor 3, 90kDa	3609	-3.49436	-2.94701	0.00777944	0.027453
209024_s_at	SYNCRIP	synaptotagmin binding, cytoplasmic RNA interacting protein	10492	-3.49369	-5.34052	2.83e-05	0.000299988
214464_at	CDC42BPA	CDC42 binding protein kinase alpha (DMPK-like)	8476	-3.4934	-3.34959	0.00308266	0.0132719
221683_s_at	CEP290	centrosomal protein 290kDa	80184	-3.46492	-3.78766	0.00110106	0.00574136
211074_at	FOLR1	folate receptor 1 (adult)	2348	-3.4642	-6.07475	5.32e-06	7.7e-05
204114_at	NID2	nidogen 2 (osteonidogen)	22795	-3.46418	-20.7607	2.49e-15	1.95e-12
205559_s_at	PCSK5	proprotein convertase subtilisin/kexin type 5	5125	-3.45787	-14.9304	1.51e-12	3.39e-10
222587_s_at	GALNT7	UDP-N-acetyl-alpha-D-galactosamine:polypeptide N-acetylgalactosaminyltransferase 7 (GalNAc-T7)	51809	-3.44498	-6.60316	1.66e-06	2.99e-05
210281_s_at	ZMYM2	zinc finger, MYM-type 2	7750	-3.43207	-5.57482	1.65e-05	0.000192838
212188_at	KCTD12	potassium channel tetramerisation domain containing 12	115207	-3.42496	-7.43239	2.88e-07	7.06e-06
202669_s_at	EFNB2	ephrin-B2	1948	-3.42088	-5.24445	3.53e-05	0.000357836
1552487_a_at	BNC1	basonuclin 1	646	-3.41189	-9.39204	6.59e-09	3.24e-07
229380_at	---	---	---	-3.40945	-21.2601	1.55e-15	1.35e-12
1557910_at	HSP90AB1	heat shock protein 90kDa alpha (cytosolic), class B member 1	3326	-3.40903	-3.07858	0.00576536	0.0216775
214829_at	AASS	aminoadipate-semialdehyde synthase	10157	-3.4086	-9.6082	4.48e-09	2.41e-07
1556371_at	OLIG3	oligodendrocyte transcription factor 3	167826	-3.40745	-9.9931	2.28e-09	1.37e-07
212468_at	SPAG9	sperm associated antigen 9	9043	-3.40522	-5.8086	9.68e-06	0.000125629
240307_at	---	---	---	-3.39695	-11.6663	1.47e-10	1.44e-08
230204_at	HAPLN1	hyaluronan and proteoglycan link protein 1	1404	-3.38891	-13.2674	1.39e-11	2.12e-09
212758_s_at	ZEB1	zinc finger E-box binding homeobox 1	6935	-3.38427	-5.73791	1.14e-05	0.000142547
205809_s_at	WASL	Wiskott-Aldrich syndrome-like	8976	-3.38084	-3.4743	0.00230354	0.0104838
201860_s_at	PLAT	plasminogen activator, tissue	5327	-3.37532	-21.5525	1.19e-15	1.09e-12
223038_s_at	FAM60A	family with sequence similarity 60, member A	58516	-3.36484	-4.92803	7.4e-05	0.00065236
201730_s_at	TPR	translocated promoter region (to activated MET oncogene)	7175	-3.35862	-7.05267	6.36e-07	1.36e-05
229353_s_at	NUCKS1	nuclear casein kinase and cyclin-dependent kinase substrate 1	64710	-3.35338	-5.69501	1.25e-05	0.000154574
1558678_s_at	MALAT1	metastasis associated lung adenocarcinoma transcript 1 (non-protein coding)	378938	-3.30648	-2.93102	0.00806601	0.0282376
205366_s_at	HOXB6	homeobox B6	3216	-3.29207	-10.3538	1.23e-09	8.37e-08
227928_at	C12orf48	chromosome 12 open reading frame 48	55010	-3.25858	-8.07066	7.97e-08	2.45e-06
211813_x_at	DCN	decorin	1634	-3.25407	-12.9926	2.05e-11	2.93e-09
222439_s_at	THRAP3	thyroid hormone receptor associated protein 3	9967	-3.23712	-3.82065	0.00101837	0.00539757
206061_s_at	DICER1	dicer 1, ribonuclease type III	23405	-3.22862	-4.69498	0.00012806	0.00101452
201744_s_at	LUM	lumican	4060	-3.22747	-14.2761	3.52e-12	6.87e-10
241955_at	HECTD1	HECT domain containing 1	25831	-3.21635	-4.83664	9.17e-05	0.000773509
206894_at	APOA4	apolipoprotein A-IV	337	-3.21318	-12.8094	2.67e-11	3.56e-09
236356_at	NDUFS1	NADH dehydrogenase (ubiquinone) Fe-S protein 1, 75kDa (NADH-coenzyme Q reductase)	4719	-3.20664	-5.66888	1.33e-05	0.000161582
239597_at	---	---	---	-3.18861	-5.8162	9.52e-06	0.000124035
217813_s_at	SPIN1	spindlin 1	10927	-3.1735	-6.72064	1.29e-06	2.42e-05
213994_s_at	SPON1	spondin 1, extracellular matrix protein	10418	-3.16993	-9.03598	1.26e-08	5.42e-07
209642_at	BUB1	budding uninhibited by benzimidazoles 1 homolog (yeast)	699	-3.16873	-9.82345	3.06e-09	1.76e-07
233219_at	---	---	---	-3.16841	-6.14574	4.54e-06	6.77e-05
201349_at	SLC9A3R1	solute carrier family 9 (sodium/hydrogen exchanger), member 3 regulator 1	9368	-3.16601	-14.3052	3.39e-12	6.65e-10
201101_s_at	BCLAF1	BCL2-associated transcription factor 1	9774	-3.15718	-5.33887	2.84e-05	0.00030084
212382_at	TCF4	transcription factor 4	6925	-3.15645	-7.78035	1.42e-07	3.94e-06
226360_at	ZNRF3	zinc and ring finger 3	84133	-3.15471	-21.6204	1.11e-15	1.05e-12
201927_s_at	PKP4	plakophilin 4	8502	-3.15399	-4.74146	0.000114756	0.000930879
229554_at	---	---	---	-3.12847	-10.8929	5.03e-10	4.01e-08
227152_at	C12orf35	chromosome 12 open reading frame 35	55196	-3.12489	-4.61498	0.000154712	0.00117702
209655_s_at	TMEM47	transmembrane protein 47	83604	-3.11716	-4.35653	0.000285444	0.00193647
215123_at	LOC642778 /// LOC729602 /// NPIPL3	hypothetical LOC642778 /// NPIP-like protein ENSP00000283050 /// nuclear pore complex interacting protein-like 3	23117 /// 642778 /// 729602	-3.11407	-5.80996	9.65e-06	0.000125343
219764_at	FZD10	frizzled homolog 10 (Drosophila)	11211	-3.1136	-22.9596	3.37e-16	4.72e-13
204315_s_at	GTSE1	G-2 and S-phase expressed 1	51512	-3.10537	-4.83899	9.12e-05	0.000771049
209406_at	BAG2	BCL2-associated athanogene 2	9532	-3.09472	-16.197	3.17e-13	1.03e-10
231061_at	---	---	---	-3.08965	-8.53262	3.25e-08	1.17e-06
206367_at	REN	renin	5972	-3.07822	-10.0221	2.17e-09	1.32e-07
233869_x_at	---	---	---	-3.07679	-10.4509	1.04e-09	7.35e-08
219787_s_at	ECT2	epithelial cell transforming sequence 2 oncogene	1894	-3.06962	-9.96055	2.41e-09	1.44e-07
206432_at	HAS2	hyaluronan synthase 2	3037	-3.05865	-8.61528	2.78e-08	1.03e-06
205522_at	HOXD4	homeobox D4	3233	-3.05793	-18.1156	3.62e-14	1.69e-11
228692_at	---	---	---	-3.05274	-12.2708	5.87e-11	6.8e-09
226582_at	LOC400043	hypothetical LOC400043	400043	-3.04198	-16.0376	3.84e-13	1.18e-10
239230_at	HES5	hairy and enhancer of split 5 (Drosophila)	388585	-3.04006	-12.0171	8.6e-11	9.11e-09
202660_at	ITPR2	inositol 1,4,5-triphosphate receptor, type 2	3709	-3.02899	-8.82423	1.87e-08	7.48e-07
211429_s_at	SERPINA1	serpin peptidase inhibitor, clade A (alpha-1 antiproteinase, antitrypsin), member 1	5265	-3.02393	-9.96743	2.38e-09	1.42e-07
230618_s_at	---	---	---	-3.01967	-4.4838	0.000211065	0.00151688
207672_at	---	---	---	-3.01831	-12.3538	5.19e-11	6.21e-09
214499_s_at	BCLAF1	BCL2-associated transcription factor 1	9774	-3.01387	-6.49262	2.11e-06	3.6e-05
207761_s_at	METTL7A	methyltransferase like 7A	25840	-2.99306	-14.7079	2e-12	4.22e-10
202350_s_at	MATN2	matrilin 2	4147	-2.98731	-19.096	1.29e-14	7.43e-12
241883_x_at	---	---	---	-2.98402	-9.22234	8.96e-09	4.09e-07
242890_at	---	---	---	-2.97934	-15.8688	4.7e-13	1.4e-10
242429_at	ZNF567	zinc finger protein 567	163081	-2.978	-5.49176	2e-05	0.000226662
222740_at	ATAD2	ATPase family, AAA domain containing 2	29028	-2.97754	-9.36918	6.87e-09	3.35e-07
213229_at	DICER1	dicer 1, ribonuclease type III	23405	-2.97717	-5.08407	5.13e-05	0.000483832
212989_at	SGMS1	sphingomyelin synthase 1	259230	-2.97507	-8.38695	4.3e-08	1.47e-06
226085_at	CBX5	chromobox homolog 5 (HP1 alpha homolog, Drosophila)	23468	-2.9732	-4.24501	0.000371977	0.00239775
1554447_at	LOC554203	alanyl-tRNA synthetase domain containing 1 pseudogene	554203	-2.97286	-5.66979	1.33e-05	0.00016143
211161_s_at	COL3A1	collagen, type III, alpha 1	1281	-2.97055	-15.4957	7.42e-13	1.9e-10
204709_s_at	KIF23	kinesin family member 23	9493	-2.96725	-9.79108	3.24e-09	1.84e-07
209773_s_at	RRM2	ribonucleotide reductase M2 polypeptide	6241	-2.96665	-23.7761	1.68e-16	2.84e-13
204324_s_at	GOLIM4	golgi integral membrane protein 4	27333	-2.96442	-5.13436	4.57e-05	0.000440306
201839_s_at	EPCAM	epithelial cell adhesion molecule	4072	-2.95861	-11.9215	9.94e-11	1.03e-08
229765_at	ZNF207	zinc finger protein 207	7756	-2.95759	-4.88103	8.26e-05	0.000713831
232313_at	TMEM132C	transmembrane protein 132C	92293	-2.95449	-14.2098	3.84e-12	7.37e-10
237239_at	---	---	---	-2.95128	-9.9036	2.66e-09	1.56e-07
201852_x_at	COL3A1	collagen, type III, alpha 1	1281	-2.95055	-14.8235	1.73e-12	3.74e-10
205337_at	DCT	dopachrome tautomerase (dopachrome delta-isomerase, tyrosine-related protein 2)	1638	-2.94598	-9.1967	9.39e-09	4.25e-07
230040_at	ADAMTS18	ADAM metallopeptidase with thrombospondin type 1 motif, 18	170692	-2.94333	-12.257	5.99e-11	6.82e-09
221558_s_at	LEF1	lymphoid enhancer-binding factor 1	51176	-2.94241	-15.6144	6.41e-13	1.75e-10
215169_at	SLC35E2	solute carrier family 35, member E2	9906	-2.94182	-4.8966	7.96e-05	0.00069322
227082_at	---	---	---	-2.93659	-4.41226	0.000250085	0.00174316
203697_at	FRZB	frizzled-related protein	2487	-2.9335	-17.551	6.71e-14	2.82e-11
244846_at	---	---	---	-2.92959	-4.94594	7.09e-05	0.000630515
203887_s_at	THBD	thrombomodulin	7056	-2.91236	-8.76535	2.09e-08	8.12e-07
214985_at	EXT1	exostoses (multiple) 1	2131	-2.89585	-5.41009	2.41e-05	0.000262367
228481_at	---	---	---	-2.88774	-6.83629	1.01e-06	1.98e-05
239571_at	---	---	---	-2.87784	-3.85231	0.0009448	0.00507867
209220_at	GPC3	glypican 3	2719	-2.87747	-20.5371	3.08e-15	2.31e-12
218542_at	CEP55	centrosomal protein 55kDa	55165	-2.86653	-9.28465	8e-09	3.76e-07
201292_at	TOP2A	topoisomerase (DNA) II alpha 170kDa	7153	-2.86465	-12.8232	2.61e-11	3.54e-09
242068_at	---	---	---	-2.8585	-5.82986	9.23e-06	0.000121093
226630_at	C14orf106	chromosome 14 open reading frame 106	55320	-2.85702	-5.69525	1.25e-05	0.000154549
202283_at	SERPINF1	serpin peptidase inhibitor, clade F (alpha-2 antiplasmin, pigment epithelium derived factor), member 1	5176	-2.85532	-8.2911	5.17e-08	1.72e-06
207542_s_at	AQP1	aquaporin 1 (Colton blood group)	358	-2.85516	-5.63665	1.43e-05	0.000171392
219778_at	ZFPM2	zinc finger protein, multitype 2	23414	-2.85006	-7.80828	1.34e-07	3.78e-06
221541_at	CRISPLD2	cysteine-rich secretory protein LCCL domain containing 2	83716	-2.84466	-19.5182	8.41e-15	5.11e-12
206032_at	DSC3	desmocollin 3	1825	-2.84139	-11.252	2.82e-10	2.48e-08
235545_at	DEPDC1	DEP domain containing 1	55635	-2.82619	-7.88665	1.15e-07	3.34e-06
204162_at	NDC80	NDC80 homolog, kinetochore complex component (S. cerevisiae)	10403	-2.81671	-14.5584	2.43e-12	4.92e-10
236095_at	NTRK2	neurotrophic tyrosine kinase, receptor, type 2	4915	-2.81571	-9.92058	2.59e-09	1.53e-07
220116_at	KCNN2	potassium intermediate/small conductance calcium-activated channel, subfamily N, member 2	3781	-2.81251	-11.2805	2.7e-10	2.37e-08
214146_s_at	PPBP	pro-platelet basic protein (chemokine (C-X-C motif) ligand 7)	5473	-2.81167	-12.8162	2.64e-11	3.55e-09
213684_s_at	PDLIM5	PDZ and LIM domain 5	10611	-2.80184	-11.1767	3.18e-10	2.71e-08
212279_at	TMEM97	transmembrane protein 97	27346	-2.79944	-5.97106	6.71e-06	9.27e-05
237472_at	SOX1	SRY (sex determining region Y)-box 1	6656	-2.7885	-21.0055	1.97e-15	1.59e-12
228297_at	---	---	---	-2.78522	-9.02424	1.29e-08	5.51e-07
227884_at	TAF15	TAF15 RNA polymerase II, TATA box binding protein (TBP)-associated factor, 68kDa	8148	-2.77781	-6.38499	2.68e-06	4.38e-05
233678_at	---	---	---	-2.77778	-6.91683	8.48e-07	1.71e-05
222161_at	NAALAD2	N-acetylated alpha-linked acidic dipeptidase 2	10003	-2.77659	-9.42107	6.25e-09	3.09e-07
205923_at	RELN	reelin	5649	-2.77437	-11.0531	3.88e-10	3.2e-08
227196_at	RHPN2	rhophilin, Rho GTPase binding protein 2	85415	-2.77267	-13.48	1.03e-11	1.63e-09
222633_at	TBL1XR1	transducin (beta)-like 1 X-linked receptor 1	79718	-2.7669	-4.07472	0.000557416	0.00332365
221088_s_at	PPP1R9A	protein phosphatase 1, regulatory (inhibitor) subunit 9A	55607	-2.76438	-4.04531	0.000597733	0.00351071
226303_at	PGM5	phosphoglucomutase 5	5239	-2.76278	-8.57826	2.98e-08	1.09e-06
202085_at	TJP2	tight junction protein 2 (zona occludens 2)	9414	-2.76028	-11.9858	9.02e-11	9.4e-09
233080_s_at	PRPF40A	PRP40 pre-mRNA processing factor 40 homolog A (S. cerevisiae)	55660	-2.75708	-9.13036	1.06e-08	4.72e-07
218724_s_at	TGIF2	TGFB-induced factor homeobox 2	60436	-2.75484	-6.6604	1.47e-06	2.7e-05
201070_x_at	SF3B1	splicing factor 3b, subunit 1, 155kDa	23451	-2.75436	-5.48138	2.04e-05	0.00023067
218585_s_at	DTL	denticleless homolog (Drosophila)	51514	-2.74651	-8.94549	1.49e-08	6.24e-07
223282_at	TSHZ1	teashirt zinc finger homeobox 1	10194	-2.74502	-14.4555	2.78e-12	5.53e-10
236620_at	RIF1	RAP1 interacting factor homolog (yeast)	55183	-2.74438	-2.7521	0.0120466	0.0387096
212281_s_at	TMEM97	transmembrane protein 97	27346	-2.74331	-18.2635	3.09e-14	1.56e-11
1555945_s_at	FAM120A	family with sequence similarity 120A	23196	-2.73897	-8.23812	5.74e-08	1.89e-06
229305_at	MLF1IP	MLF1 interacting protein	79682	-2.73441	-7.87281	1.18e-07	3.42e-06
233273_at	---	---	---	-2.72852	-8.51398	3.37e-08	1.21e-06
209071_s_at	RGS5	regulator of G-protein signaling 5	8490	-2.72825	-20.4392	3.39e-15	2.42e-12
233261_at	EBF1	Early B-cell factor 1	1879	-2.71935	-3.85712	0.000934083	0.00503704
201650_at	KRT19	keratin 19	3880	-2.71658	-11.9954	8.89e-11	9.29e-09
219743_at	HEY2	hairy/enhancer-of-split related with YRPW motif 2	23493	-2.7147	-7.58033	2.13e-07	5.5e-06
201615_x_at	CALD1	caldesmon 1	800	-2.7049	-2.79051	0.0110596	0.036166
218663_at	NCAPG	non-SMC condensin I complex, subunit G	64151	-2.70486	-8.48859	3.53e-08	1.26e-06
203386_at	TBC1D4	TBC1 domain family, member 4	9882	-2.70454	-9.15883	1.01e-08	4.52e-07
207233_s_at	MITF	microphthalmia-associated transcription factor	4286	-2.70304	-13.7324	7.3e-12	1.22e-09
214087_s_at	MYBPC1	myosin binding protein C, slow type	4604	-2.70288	-10.491	9.77e-10	6.95e-08
227349_at	HELLS	helicase, lymphoid-specific	3070	-2.69822	-6.64353	1.52e-06	2.78e-05
243161_x_at	ZFP42	zinc finger protein 42 homolog (mouse)	132625	-2.68901	-9.81442	3.11e-09	1.79e-07
218782_s_at	ATAD2	ATPase family, AAA domain containing 2	29028	-2.68746	-5.6623	1.35e-05	0.000163468
236896_at	ZIC1	Zic family member 1 (odd-paired homolog, Drosophila)	7545	-2.68577	-8.70114	2.36e-08	8.98e-07
224848_at	CDK6	cyclin-dependent kinase 6	1021	-2.68201	-15.7665	5.32e-13	1.52e-10
214316_x_at	---	---	---	-2.67795	-8.40979	4.11e-08	1.42e-06
235044_at	CYYR1	cysteine/tyrosine-rich 1	116159	-2.67661	-9.43138	6.14e-09	3.06e-07
1564378_a_at	---	---	---	-2.67631	-4.67385	0.000134613	0.00105554
213007_at	FANCI	Fanconi anemia, complementation group I	55215	-2.67458	-8.89948	1.63e-08	6.67e-07
211980_at	COL4A1	collagen, type IV, alpha 1	1282	-2.66712	-14.1417	4.21e-12	7.92e-10
222680_s_at	DTL	denticleless homolog (Drosophila)	51514	-2.6665	-10.006	2.23e-09	1.35e-07
242901_at	---	---	---	-2.66046	-7.299	3.8e-07	8.84e-06
208744_x_at	HSPH1	heat shock 105kDa/110kDa protein 1	10808	-2.65507	-7.80465	1.35e-07	3.8e-06
239253_at	---	---	---	-2.64551	-6.98437	7.35e-07	1.53e-05
230494_at	SLC20A1	Solute carrier family 20 (phosphate transporter), member 1	6574	-2.64262	-10.9767	4.39e-10	3.54e-08
230272_at	LOC645323	hypothetical LOC645323	645323	-2.64226	-19.8382	6.1e-15	3.78e-12
242579_at	BMPR1B	bone morphogenetic protein receptor, type IB	658	-2.64163	-6.53195	1.94e-06	3.36e-05
229724_at	GABRB3	gamma-aminobutyric acid (GABA) A receptor, beta 3	2562	-2.63877	-4.86305	8.62e-05	0.000738507
236163_at	LIX1	Lix1 homolog (chicken)	167410	-2.63654	-14.8569	1.65e-12	3.65e-10
213506_at	F2RL1	coagulation factor II (thrombin) receptor-like 1	2150	-2.62638	-9.05817	1.21e-08	5.26e-07
201626_at	INSIG1	insulin induced gene 1	3638	-2.62572	-10.5214	9.29e-10	6.66e-08
202409_at	IGF2 /// INS-IGF2	insulin-like growth factor 2 (somatomedin A) /// INS-IGF2 readthrough transcript	3481 /// 723961	-2.62289	-5.33598	2.86e-05	0.000302369
215076_s_at	COL3A1	collagen, type III, alpha 1	1281	-2.62111	-13.8395	6.32e-12	1.09e-09
231860_at	BRWD1	bromodomain and WD repeat domain containing 1	54014	-2.61626	-4.83715	9.16e-05	0.000772982
221750_at	HMGCS1	3-hydroxy-3-methylglutaryl-Coenzyme A synthase 1 (soluble)	3157	-2.61466	-16.2182	3.09e-13	1.02e-10
212079_s_at	MLL	myeloid/lymphoid or mixed-lineage leukemia (trithorax homolog, Drosophila)	4297	-2.61301	-4.49681	0.000204656	0.00148007
213880_at	LGR5	leucine-rich repeat-containing G protein-coupled receptor 5	8549	-2.61113	-5.98561	6.5e-06	9.03e-05
225420_at	GPAM	glycerol-3-phosphate acyltransferase, mitochondrial	57678	-2.60999	-5.30914	3.04e-05	0.000316645
226980_at	DEPDC1B	DEP domain containing 1B	55789	-2.60921	-8.12716	7.13e-08	2.24e-06
204026_s_at	ZWINT	ZW10 interactor	11130	-2.6087	-22.3087	5.97e-16	7.69e-13
221561_at	SOAT1	sterol O-acyltransferase 1	6646	-2.60387	-6.6416	1.53e-06	2.79e-05
222024_s_at	AKAP13	A kinase (PRKA) anchor protein 13	11214	-2.60114	-5.4444	2.23e-05	0.000246248
202035_s_at	SFRP1	secreted frizzled-related protein 1	6422	-2.59941	-2.78175	0.0112776	0.0367224
236118_at	LOC100128893 /// LOC728473	hypothetical protein LOC100128893 /// hypothetical LOC728473	100128893 /// 728473	-2.59645	-9.7437	3.52e-09	1.97e-07
231735_s_at	MALAT1	metastasis associated lung adenocarcinoma transcript 1 (non-protein coding)	378938	-2.59613	-3.563	0.00187062	0.00884864
213056_at	FRMD4B	FERM domain containing 4B	23150	-2.59596	-7.43373	2.87e-07	7.05e-06
212195_at	IL6ST	interleukin 6 signal transducer (gp130, oncostatin M receptor)	3572	-2.59304	-16.4611	2.32e-13	7.96e-11
204588_s_at	SLC7A7	solute carrier family 7 (cationic amino acid transporter, y+ system), member 7	9056	-2.59283	-8.78034	2.03e-08	7.96e-07
227350_at	HELLS	helicase, lymphoid-specific	3070	-2.59133	-14.0529	4.74e-12	8.62e-10
228729_at	CCNB1	cyclin B1	891	-2.59044	-12.2754	5.83e-11	6.78e-09
1569512_at	---	---	---	-2.58871	-7.29728	3.81e-07	8.86e-06
241440_at	FLJ30375	hypothetical protein LOC440982	440982	-2.58371	-15.0551	1.29e-12	2.96e-10
213562_s_at	SQLE	squalene epoxidase	6713	-2.57976	-7.56681	2.19e-07	5.63e-06
227497_at	SOX6	SRY (sex determining region Y)-box 6	55553	-2.57812	-11.6447	1.52e-10	1.47e-08
229061_s_at	SLC25A13	solute carrier family 25, member 13 (citrin)	10165	-2.57793	-6.32006	3.09e-06	4.94e-05
230372_at	HAS2	Hyaluronan synthase 2	3037	-2.57696	-8.13635	7e-08	2.21e-06
208647_at	FDFT1	farnesyl-diphosphate farnesyltransferase 1	2222	-2.5746	-16.0448	3.81e-13	1.18e-10
224563_at	WASF2	WAS protein family, member 2	10163	-2.57288	-3.58806	0.00176357	0.00843895
212794_s_at	KIAA1033	KIAA1033	23325	-2.57279	-5.36285	2.69e-05	0.000287736
206286_s_at	TDGF1 /// TDGF3	teratocarcinoma-derived growth factor 1 /// teratocarcinoma-derived growth factor 3, pseudogene	6997 /// 6998	-2.56978	-12.1893	6.63e-11	7.42e-09
204822_at	TTK	TTK protein kinase	7272	-2.56717	-10.0619	2.02e-09	1.26e-07
211596_s_at	LRIG1	leucine-rich repeats and immunoglobulin-like domains 1	26018	-2.56346	-18.0136	4.05e-14	1.81e-11
239791_at	LOC100130740	similar to hCG2042068	100130740	-2.56278	-7.56213	2.21e-07	5.68e-06
1555778_a_at	POSTN	periostin, osteoblast specific factor	10631	-2.56044	-9.08445	1.15e-08	5.07e-07
228478_at	---	---	---	-2.55654	-7.65973	1.81e-07	4.81e-06
207700_s_at	NCOA3	nuclear receptor coactivator 3	8202	-2.55292	-7.21618	4.51e-07	1.02e-05
214305_s_at	SF3B1	splicing factor 3b, subunit 1, 155kDa	23451	-2.5519	-5.08833	5.08e-05	0.000480309
211719_x_at	FN1	fibronectin 1	2335	-2.55115	-17.2656	9.23e-14	3.81e-11
228156_at	---	---	---	-2.54975	-8.00184	9.13e-08	2.76e-06
219918_s_at	ASPM	asp (abnormal spindle) homolog, microcephaly associated (Drosophila)	259266	-2.54916	-10.0067	2.23e-09	1.35e-07
243857_at	MORF4L2	Mortality factor 4 like 2	9643	-2.54177	-4.23615	0.000379894	0.0024395
243031_at	---	---	---	-2.53887	-4.62397	0.000151458	0.0011565
203764_at	DLGAP5	discs, large (Drosophila) homolog-associated protein 5	9787	-2.53542	-6.00386	6.24e-06	8.73e-05
230895_at	HAPLN1	hyaluronan and proteoglycan link protein 1	1404	-2.53411	-9.49956	5.43e-09	2.79e-07
226817_at	DSC2	desmocollin 2	1824	-2.5335	-7.65872	1.82e-07	4.82e-06
200774_at	FAM120A	family with sequence similarity 120A	23196	-2.52771	-11.2235	2.95e-10	2.56e-08
232238_at	ASPM	asp (abnormal spindle) homolog, microcephaly associated (Drosophila)	259266	-2.52662	-4.30074	0.000325869	0.00215799
231213_at	PDE1A	phosphodiesterase 1A, calmodulin-dependent	5136	-2.52471	-10.2647	1.43e-09	9.38e-08
221795_at	NTRK2	neurotrophic tyrosine kinase, receptor, type 2	4915	-2.52463	-6.95521	7.81e-07	1.61e-05
218723_s_at	C13orf15	chromosome 13 open reading frame 15	28984	-2.52448	-12.0497	8.19e-11	8.73e-09
224428_s_at	CDCA7	cell division cycle associated 7	83879	-2.52114	-9.23438	8.77e-09	4.03e-07
229797_at	MCOLN3	mucolipin 3	55283	-2.51848	-7.17523	4.91e-07	1.09e-05
228904_at	HOXB3	homeobox B3	3213	-2.51827	-12.1074	7.5e-11	8.16e-09
218039_at	NUSAP1	nucleolar and spindle associated protein 1	51203	-2.51793	-17.1096	1.1e-13	4.22e-11
232060_at	ROR1	receptor tyrosine kinase-like orphan receptor 1	4919	-2.51415	-9.20859	9.19e-09	4.19e-07
243361_at	SFRS12	splicing factor, arginine/serine-rich 12	140890	-2.51344	-4.12952	0.000489387	0.0029951
202291_s_at	MGP	matrix Gla protein	4256	-2.51339	-6.91975	8.42e-07	1.71e-05
203296_s_at	ATP1A2	ATPase, Na+/K+ transporting, alpha 2 (+) polypeptide	477	-2.51075	-14.027	4.9e-12	8.73e-10
204727_at	WDHD1	WD repeat and HMG-box DNA binding protein 1	11169	-2.50923	-7.48113	2.61e-07	6.53e-06
225571_at	LIFR	leukemia inhibitory factor receptor alpha	3977	-2.50648	-4.70701	0.000124476	0.000990762
219000_s_at	DSCC1	defective in sister chromatid cohesion 1 homolog (S. cerevisiae)	79075	-2.50502	-14.6014	2.3e-12	4.72e-10
205034_at	CCNE2	cyclin E2	9134	-2.50495	-6.97386	7.51e-07	1.55e-05
243683_at	MORF4L2	Mortality factor 4 like 2	9643	-2.5041	-4.61045	0.000156378	0.00118718
202314_at	CYP51A1	cytochrome P450, family 51, subfamily A, polypeptide 1	1595	-2.50346	-11.6406	1.53e-10	1.47e-08
224847_at	CDK6	cyclin-dependent kinase 6	1021	-2.50173	-12.0009	8.81e-11	9.26e-09
222608_s_at	ANLN	anillin, actin binding protein	54443	-2.50164	-7.79564	1.38e-07	3.86e-06
228401_at	ATAD2	ATPase family, AAA domain containing 2	29028	-2.49966	-9.05092	1.23e-08	5.31e-07
230256_at	C1orf104	Chromosome 1 open reading frame 104	284618	-2.49765	-5.77469	1.05e-05	0.000133675
231183_s_at	JAG1	Jagged 1 (Alagille syndrome)	182	-2.49751	-8.8315	1.85e-08	7.39e-07
243386_at	CASZ1	castor zinc finger 1	54897	-2.48487	-12.6389	3.41e-11	4.31e-09
203625_x_at	SKP2	S-phase kinase-associated protein 2 (p45)	6502	-2.48321	-15.0675	1.27e-12	2.95e-10
218162_at	OLFML3	olfactomedin-like 3	56944	-2.47986	-11.0634	3.82e-10	3.16e-08
225688_s_at	PHLDB2	pleckstrin homology-like domain, family B, member 2	90102	-2.47431	-9.90666	2.65e-09	1.56e-07
1558680_s_at	PDE1A	phosphodiesterase 1A, calmodulin-dependent	5136	-2.47335	-9.29383	7.87e-09	3.73e-07
212282_at	TMEM97	transmembrane protein 97	27346	-2.47212	-21.6735	1.06e-15	1.03e-12
243868_at	---	---	---	-2.47133	-4.71494	0.000122165	0.000976072
1559394_a_at	---	---	---	-2.46856	-10.1637	1.7e-09	1.08e-07
204128_s_at	RFC3	replication factor C (activator 1) 3, 38kDa	5983	-2.46783	-6.48233	2.16e-06	3.67e-05
229498_at	---	---	---	-2.46653	-11.3757	2.32e-10	2.06e-08
209466_x_at	PTN	pleiotrophin	5764	-2.46357	-7.69978	1.67e-07	4.5e-06
216518_at	---	---	---	-2.46297	-4.56818	0.000172828	0.00128629
213577_at	SQLE	squalene epoxidase	6713	-2.46215	-4.99308	6.35e-05	0.000575225
227503_at	---	---	---	-2.45873	-12.149	7.05e-11	7.75e-09
224933_s_at	JMJD1C	jumonji domain containing 1C	221037	-2.45741	-4.92751	7.41e-05	0.0006528
208694_at	PRKDC	protein kinase, DNA-activated, catalytic polypeptide	5591	-2.45584	-15.4251	8.1e-13	2.04e-10
205126_at	VRK2	vaccinia related kinase 2	7444	-2.4557	-10.0595	2.03e-09	1.26e-07
243552_at	MBTD1	mbt domain containing 1	54799	-2.45474	-5.43478	2.27e-05	0.000250561
222037_at	MCM4	minichromosome maintenance complex component 4	4173	-2.45258	-8.27909	5.3e-08	1.75e-06
1553810_a_at	KIAA1524	KIAA1524	57650	-2.45235	-9.73866	3.55e-09	1.99e-07
237444_at	---	---	---	-2.45231	-6.56062	1.82e-06	3.21e-05
219181_at	LIPG	lipase, endothelial	9388	-2.44835	-7.49742	2.52e-07	6.36e-06
1558173_a_at	LUZP1	leucine zipper protein 1	7798	-2.448	-3.11821	0.00526467	0.0201789
241457_at	---	---	---	-2.44794	-7.97926	9.55e-08	2.88e-06
216268_s_at	JAG1	jagged 1 (Alagille syndrome)	182	-2.44118	-10.3313	1.28e-09	8.52e-08
222406_s_at	PNRC2	proline-rich nuclear receptor coactivator 2	55629	-2.44005	-3.43187	0.00254406	0.0113774
213002_at	MARCKS	myristoylated alanine-rich protein kinase C substrate	4082	-2.43999	-7.84493	1.25e-07	3.56e-06
1558093_s_at	MATR3	matrin 3	9782	-2.43238	-5.81756	9.49e-06	0.000123703
204244_s_at	DBF4	DBF4 homolog (S. cerevisiae)	10926	-2.43047	-9.05459	1.22e-08	5.28e-07
212812_at	---	---	---	-2.42858	-12.2355	6.19e-11	7.02e-09
219148_at	PBK	PDZ binding kinase	55872	-2.42805	-15.6469	6.16e-13	1.7e-10
237333_at	RBBP4	retinoblastoma binding protein 4	5928	-2.4279	-3.69259	0.00137848	0.00687296
1552627_a_at	ARHGAP5	Rho GTPase activating protein 5	394	-2.4258	-4.72706	0.000118721	0.000954627
204048_s_at	PHACTR2	phosphatase and actin regulator 2	9749	-2.42463	-12.8152	2.64e-11	3.55e-09
221718_s_at	AKAP13	A kinase (PRKA) anchor protein 13	11214	-2.42382	-6.43188	2.41e-06	4.04e-05
204256_at	ELOVL6	ELOVL family member 6, elongation of long chain fatty acids (FEN1/Elo2, SUR4/Elo3-like, yeast)	79071	-2.42063	-9.14918	1.02e-08	4.59e-07
216450_x_at	HSP90B1	heat shock protein 90kDa beta (Grp94), member 1	7184	-2.417	-4.66942	0.000136031	0.0010638
202600_s_at	NRIP1	nuclear receptor interacting protein 1	8204	-2.41584	-5.91764	7.57e-06	0.000102155
210052_s_at	TPX2	TPX2, microtubule-associated, homolog (Xenopus laevis)	22974	-2.41439	-16.1395	3.4e-13	1.09e-10
226461_at	HOXB9	homeobox B9	3219	-2.4122	-9.47169	5.71e-09	2.86e-07
234101_at	---	---	---	-2.41018	-3.31002	0.0033799	0.0142768
224894_at	YAP1	Yes-associated protein 1, 65kDa	10413	-2.40485	-18.0788	3.77e-14	1.72e-11
204444_at	KIF11	kinesin family member 11	3832	-2.40362	-15.5292	7.12e-13	1.85e-10
212027_at	RBM25	RNA binding motif protein 25	58517	-2.40311	-3.47034	0.00232502	0.0105651
235009_at	BOD1L	biorientation of chromosomes in cell division 1-like	259282	-2.40301	-2.94509	0.00781329	0.0275355
231734_at	RBP2	retinol binding protein 2, cellular	5948	-2.40277	-11.2375	2.89e-10	2.53e-08
223595_at	TMEM133	transmembrane protein 133	83935	-2.40254	-9.65048	4.15e-09	2.26e-07
240971_x_at	---	---	---	-2.39849	-5.56951	1.67e-05	0.00019481
200862_at	DHCR24	24-dehydrocholesterol reductase	1718	-2.39444	-15.7801	5.24e-13	1.51e-10
209047_at	AQP1	aquaporin 1 (Colton blood group)	358	-2.38728	-8.89294	1.65e-08	6.73e-07
242389_at	---	---	---	-2.38554	-9.25323	8.47e-09	3.92e-07
212762_s_at	TCF7L2	transcription factor 7-like 2 (T-cell specific, HMG-box)	6934	-2.38266	-7.34545	3.45e-07	8.17e-06
223170_at	TMEM98	transmembrane protein 98	26022	-2.38253	-19.4732	8.8e-15	5.25e-12
241060_x_at	---	---	---	-2.38185	-3.33653	0.00317778	0.0136086
222696_at	AXIN2	axin 2	8313	-2.38103	-15.5566	6.88e-13	1.82e-10
218817_at	SPCS3	signal peptidase complex subunit 3 homolog (S. cerevisiae)	60559	-2.38055	-8.003	9.11e-08	2.76e-06
218521_s_at	UBE2W	ubiquitin-conjugating enzyme E2W (putative)	55284	-2.37943	-4.77101	0.000107031	0.00087952
232569_at	---	---	---	-2.37707	-3.90816	0.00082766	0.004575
219507_at	RSRC1	arginine/serine-rich coiled-coil 1	51319	-2.37557	-3.63639	0.00157387	0.00767514
206364_at	KIF14	kinesin family member 14	9928	-2.37391	-13.0718	1.83e-11	2.68e-09
216228_s_at	WDHD1	WD repeat and HMG-box DNA binding protein 1	11169	-2.37333	-5.7722	1.05e-05	0.000134273
203354_s_at	PSD3	pleckstrin and Sec7 domain containing 3	23362	-2.37289	-5.96809	6.76e-06	9.31e-05
225565_at	CREB1	cAMP responsive element binding protein 1	1385	-2.37037	-5.15842	4.32e-05	0.000421598
201427_s_at	SEPP1	selenoprotein P, plasma, 1	6414	-2.3667	-10.0787	1.97e-09	1.23e-07
236524_at	---	---	---	-2.36601	-4.15595	0.000459609	0.00284914
206500_s_at	C14orf106	chromosome 14 open reading frame 106	55320	-2.36511	-7.18079	4.86e-07	1.08e-05
216442_x_at	FN1	fibronectin 1	2335	-2.36436	-16.2193	3.09e-13	1.02e-10
213032_at	NFIB	nuclear factor I/B	4781	-2.36422	-6.69077	1.38e-06	2.55e-05
201890_at	RRM2	ribonucleotide reductase M2 polypeptide	6241	-2.36422	-14.1122	4.38e-12	8.15e-10
205046_at	CENPE	centromere protein E, 312kDa	1062	-2.36397	-6.15307	4.47e-06	6.69e-05
214577_at	MAP1B	microtubule-associated protein 1B	4131	-2.36287	-3.57533	0.00181718	0.00864664
239238_at	---	---	---	-2.36245	-12.191	6.62e-11	7.42e-09
204731_at	TGFBR3	transforming growth factor, beta receptor III	7049	-2.36201	-6.57049	1.78e-06	3.15e-05
223556_at	HELLS	helicase, lymphoid-specific	3070	-2.36015	-9.27442	8.15e-09	3.83e-07
207165_at	HMMR	hyaluronan-mediated motility receptor (RHAMM)	3161	-2.35934	-9.15266	1.02e-08	4.57e-07
236641_at	KIF14	kinesin family member 14	9928	-2.35893	-9.41382	6.34e-09	3.13e-07
235059_at	RAB12	RAB12, member RAS oncogene family	201475	-2.35766	-3.61576	0.00165226	0.00799778
203325_s_at	COL5A1	collagen, type V, alpha 1	1289	-2.35629	-14.9077	1.55e-12	3.44e-10
211737_x_at	PTN	pleiotrophin	5764	-2.35541	-7.93783	1.04e-07	3.08e-06
203628_at	IGF1R	insulin-like growth factor 1 receptor	3480	-2.3554	-8.31246	4.96e-08	1.67e-06
218006_s_at	ZNF22	zinc finger protein 22 (KOX 15)	7570	-2.3512	-4.15736	0.000458078	0.00284074
204304_s_at	PROM1	prominin 1	8842	-2.34888	-7.4633	2.71e-07	6.71e-06
202040_s_at	KDM5A	lysine (K)-specific demethylase 5A	5927	-2.34712	-6.21047	3.93e-06	6.05e-05
241885_at	---	---	---	-2.3471	-5.64547	1.4e-05	0.000168665
203910_at	ARHGAP29	Rho GTPase activating protein 29	9411	-2.34704	-6.91419	8.52e-07	1.72e-05
209560_s_at	DLK1	delta-like 1 homolog (Drosophila)	8788	-2.34531	-20.1502	4.49e-15	3.14e-12
211000_s_at	IL6ST	interleukin 6 signal transducer (gp130, oncostatin M receptor)	3572	-2.34393	-3.79407	0.00108448	0.00567881
204825_at	MELK	maternal embryonic leucine zipper kinase	9833	-2.34361	-12.9776	2.09e-11	2.97e-09
223839_s_at	SCD	stearoyl-CoA desaturase (delta-9-desaturase)	6319	-2.34353	-5.3993	2.47e-05	0.000267262
226365_at	---	---	---	-2.34329	-4.79382	0.000101431	0.000840577
212977_at	CXCR7	chemokine (C-X-C motif) receptor 7	57007	-2.3431	-12.3253	5.42e-11	6.41e-09
223315_at	NTN4	netrin 4	59277	-2.34181	-5.96685	6.78e-06	9.33e-05
205079_s_at	MPDZ	multiple PDZ domain protein	8777	-2.34131	-6.43439	2.4e-06	4.02e-05
213051_at	ZC3HAV1	zinc finger CCCH-type, antiviral 1	56829	-2.34042	-11.1605	3.27e-10	2.75e-08
201930_at	MCM6	minichromosome maintenance complex component 6	4175	-2.33997	-12.8258	2.6e-11	3.54e-09
218469_at	GREM1	gremlin 1, cysteine knot superfamily, homolog (Xenopus laevis)	26585	-2.33956	-9.79287	3.23e-09	1.84e-07
202309_at	MTHFD1	methylenetetrahydrofolate dehydrogenase (NADP+ dependent) 1, methenyltetrahydrofolate cyclohydrolase, formyltetrahydrofolate synthetase	4522	-2.33883	-15.0744	1.26e-12	2.95e-10
211968_s_at	HSP90AA1	heat shock protein 90kDa alpha (cytosolic), class A member 1	3320	-2.3384	-10.8902	5.05e-10	4.02e-08
219682_s_at	TBX3	T-box 3	6926	-2.33785	-9.12017	1.08e-08	4.8e-07
200806_s_at	HSPD1	heat shock 60kDa protein 1 (chaperonin)	3329	-2.33681	-12.9243	2.26e-11	3.15e-09
231999_at	ANKRD11	ankyrin repeat domain 11	29123	-2.33619	-3.05142	0.00613487	0.0227796
209709_s_at	HMMR	hyaluronan-mediated motility receptor (RHAMM)	3161	-2.33268	-5.40692	2.43e-05	0.000263845
231925_at	---	---	---	-2.32861	-7.40716	3.04e-07	7.35e-06
203145_at	SPAG5	sperm associated antigen 5	10615	-2.32658	-12.0081	8.72e-11	9.2e-09
205628_at	PRIM2	primase, DNA, polypeptide 2 (58kDa)	5558	-2.32615	-7.0803	6e-07	1.3e-05
204779_s_at	HOXB7	homeobox B7	3217	-2.3247	-10.5529	8.81e-10	6.38e-08
219990_at	E2F8	E2F transcription factor 8	79733	-2.3204	-8.14045	6.94e-08	2.2e-06
212464_s_at	FN1	fibronectin 1	2335	-2.31982	-16.3446	2.67e-13	8.99e-11
204146_at	RAD51AP1	RAD51 associated protein 1	10635	-2.31784	-13.599	8.77e-12	1.41e-09
230265_at	SEL1L	Sel-1 suppressor of lin-12-like (C. elegans)	6400	-2.31597	-3.00396	0.00683599	0.024822
228468_at	MASTL	microtubule associated serine/threonine kinase-like	84930	-2.31442	-6.94167	8.04e-07	1.64e-05
215338_s_at	NKTR	natural killer-tumor recognition sequence	4820	-2.30977	-4.49847	0.000203851	0.00147548
230180_at	---	---	---	-2.30744	-2.98224	0.00718207	0.0257994
211953_s_at	IPO5	importin 5	3843	-2.30659	-9.92974	2.54e-09	1.51e-07
218102_at	DERA	2-deoxyribose-5-phosphate aldolase homolog (C. elegans)	51071	-2.30626	-12.8331	2.58e-11	3.52e-09
223381_at	NUF2	NUF2, NDC80 kinetochore complex component, homolog (S. cerevisiae)	83540	-2.30441	-11.4942	1.92e-10	1.77e-08
236234_at	PDE1A	phosphodiesterase 1A, calmodulin-dependent	5136	-2.30401	-4.99693	6.29e-05	0.000571148
209436_at	SPON1	spondin 1, extracellular matrix protein	10418	-2.29843	-11.5702	1.71e-10	1.61e-08
202430_s_at	PLSCR1	phospholipid scramblase 1	5359	-2.29822	-8.15434	6.76e-08	2.15e-06
1569476_at	DKFZP434L187	hypothetical LOC26082	26082	-2.29797	-6.8286	1.02e-06	2e-05
222895_s_at	BCL11B	B-cell CLL/lymphoma 11B (zinc finger protein)	64919	-2.29646	-11.1989	3.07e-10	2.65e-08
221589_s_at	ALDH6A1	aldehyde dehydrogenase 6 family, member A1	4329	-2.29493	-9.77103	3.36e-09	1.89e-07
213470_s_at	HNRNPH1	heterogeneous nuclear ribonucleoprotein H1 (H)	3187	-2.29308	-6.58602	1.73e-06	3.07e-05
201308_s_at	2011-09-11	septin 11	55752	-2.29225	-5.503	1.94e-05	0.000221978
201596_x_at	KRT18	keratin 18	3875	-2.29222	-15.1208	1.18e-12	2.85e-10
210495_x_at	FN1	fibronectin 1	2335	-2.29191	-15.1012	1.21e-12	2.89e-10
214710_s_at	CCNB1	cyclin B1	891	-2.29157	-15.598	6.54e-13	1.76e-10
213515_x_at	HBG1 /// HBG2	hemoglobin, gamma A /// hemoglobin, gamma G	3047 /// 3048	-2.28983	-11.1836	3.15e-10	2.7e-08
209218_at	SQLE	squalene epoxidase	6713	-2.28909	-9.08096	1.16e-08	5.08e-07
207345_at	FST	follistatin	10468	-2.28551	-6.55713	1.84e-06	3.23e-05
219118_at	FKBP11	FK506 binding protein 11, 19 kDa	51303	-2.28465	-7.74889	1.51e-07	4.13e-06
209815_at	PTCH1	patched homolog 1 (Drosophila)	5727	-2.28446	-11.7601	1.27e-10	1.27e-08
238453_at	FGFBP3	fibroblast growth factor binding protein 3	143282	-2.28227	-12.9878	2.06e-11	2.94e-09
225655_at	UHRF1	ubiquitin-like with PHD and ring finger domains 1	29128	-2.27883	-14.1294	4.28e-12	8.01e-10
201438_at	COL6A3	collagen, type VI, alpha 3	1293	-2.27872	-11.1881	3.12e-10	2.68e-08
211042_x_at	MCAM	melanoma cell adhesion molecule	4162	-2.27851	-13.408	1.14e-11	1.78e-09
207198_s_at	LIMS1	LIM and senescent cell antigen-like domains 1	3987	-2.27836	-5.0269	5.87e-05	0.000540515
219117_s_at	FKBP11	FK506 binding protein 11, 19 kDa	51303	-2.27713	-13.6412	8.27e-12	1.35e-09
213092_x_at	DNAJC9	DnaJ (Hsp40) homolog, subfamily C, member 9	23234	-2.27664	-10.5522	8.82e-10	6.38e-08
223673_at	RFX4	regulatory factor X, 4 (influences HLA class II expression)	5992	-2.27609	-8.88826	1.66e-08	6.78e-07
213599_at	OIP5	Opa interacting protein 5	11339	-2.27446	-17.2533	9.36e-14	3.82e-11
1565823_at	---	---	---	-2.27335	-2.63347	0.0156509	0.0472506
226899_at	UNC5B	unc-5 homolog B (C. elegans)	219699	-2.27132	-10.3454	1.25e-09	8.41e-08
238341_at	---	---	---	-2.27112	-3.44481	0.00246821	0.0111045
1555948_s_at	FAM120A	family with sequence similarity 120A	23196	-2.27076	-4.5046	0.000200912	0.00146148
235178_x_at	ESCO2	establishment of cohesion 1 homolog 2 (S. cerevisiae)	157570	-2.26997	-8.00251	9.12e-08	2.76e-06
202664_at	WIPF1	WAS/WASL interacting protein family, member 1	7456	-2.26943	-5.97773	6.61e-06	9.16e-05
201487_at	CTSC	cathepsin C	1075	-2.26782	-18.4573	2.52e-14	1.34e-11
211080_s_at	NEK2	NIMA (never in mitosis gene a)-related kinase 2	4751	-2.26764	-6.34807	2.9e-06	4.71e-05
235266_at	ATAD2	ATPase family, AAA domain containing 2	29028	-2.26688	-4.39093	0.000263067	0.00181526
201844_s_at	RYBP	RING1 and YY1 binding protein	23429	-2.26657	-7.2028	4.64e-07	1.04e-05
209875_s_at	SPP1	secreted phosphoprotein 1	6696	-2.2646	-14.7592	1.88e-12	4.03e-10
212141_at	MCM4	minichromosome maintenance complex component 4	4173	-2.26166	-12.0341	8.38e-11	8.91e-09
210868_s_at	ELOVL6	ELOVL family member 6, elongation of long chain fatty acids (FEN1/Elo2, SUR4/Elo3-like, yeast)	79071	-2.26148	-6.93023	8.24e-07	1.68e-05
238075_at	CHEK1	CHK1 checkpoint homolog (S. pombe)	1111	-2.25708	-6.26537	3.48e-06	5.46e-05
1554507_at	NAALAD2	N-acetylated alpha-linked acidic dipeptidase 2	10003	-2.25601	-5.40174	2.46e-05	0.000266385
219306_at	KIF15	kinesin family member 15	56992	-2.2557	-9.35535	7.04e-09	3.41e-07
201663_s_at	SMC4	structural maintenance of chromosomes 4	10051	-2.2544	-4.78045	0.000104677	0.000862591
206316_s_at	KNTC1	kinetochore associated 1	9735	-2.25322	-9.42088	6.26e-09	3.09e-07
209172_s_at	CENPF	centromere protein F, 350/400ka (mitosin)	1063	-2.25115	-9.03532	1.26e-08	5.42e-07
236386_at	SUZ12P	Suppressor of zeste 12 homolog pseudogene	440423	-2.25085	-5.24971	3.49e-05	0.000354609
229667_s_at	HOXB8	homeobox B8	3218	-2.24665	-7.18465	4.82e-07	1.07e-05
225807_at	JUB	jub, ajuba homolog (Xenopus laevis)	84962	-2.24457	-8.20566	6.11e-08	1.98e-06
202705_at	CCNB2	cyclin B2	9133	-2.24357	-17.8626	4.77e-14	2.07e-11
201528_at	RPA1	replication protein A1, 70kDa	6117	-2.24274	-10.8674	5.24e-10	4.14e-08
200832_s_at	SCD	stearoyl-CoA desaturase (delta-9-desaturase)	6319	-2.2424	-10.0657	2.01e-09	1.25e-07
201664_at	SMC4	structural maintenance of chromosomes 4	10051	-2.24096	-8.00077	9.15e-08	2.77e-06
201641_at	BST2	bone marrow stromal cell antigen 2	684	-2.24079	-9.08759	1.15e-08	5.05e-07
218883_s_at	MLF1IP	MLF1 interacting protein	79682	-2.24039	-13.8119	6.56e-12	1.13e-09
202431_s_at	MYC	v-myc myelocytomatosis viral oncogene homolog (avian)	4609	-2.23994	-10.667	7.29e-10	5.47e-08
205524_s_at	HAPLN1	hyaluronan and proteoglycan link protein 1	1404	-2.23794	-9.57568	4.74e-09	2.52e-07
242560_at	FANCD2	Fanconi anemia, complementation group D2	2177	-2.2378	-13.7448	7.18e-12	1.21e-09
203755_at	BUB1B	budding uninhibited by benzimidazoles 1 homolog beta (yeast)	701	-2.2351	-10.5048	9.55e-10	6.82e-08
231936_at	HOXC9	homeobox C9	3225	-2.23494	-9.11012	1.1e-08	4.88e-07
225490_at	ARID2	AT rich interactive domain 2 (ARID, RFX-like)	196528	-2.23445	-7.80446	1.35e-07	3.8e-06
210559_s_at	CDC2	cell division cycle 2, G1 to S and G2 to M	983	-2.23221	-15.6471	6.16e-13	1.7e-10
218755_at	KIF20A	kinesin family member 20A	10112	-2.23195	-13.7165	7.46e-12	1.23e-09
1557385_at	FAM161A	family with sequence similarity 161, member A	84140	-2.22968	-3.38623	0.00283025	0.0123906
236462_at	---	---	---	-2.22921	-4.71835	0.000121186	0.00096961
209669_s_at	SERBP1	SERPINE1 mRNA binding protein 1	26135	-2.22895	-8.44918	3.81e-08	1.34e-06
228563_at	GJC1	gap junction protein, gamma 1, 45kDa	10052	-2.22832	-6.40314	2.57e-06	4.26e-05
1556203_a_at	SRGAP2	SLIT-ROBO Rho GTPase activating protein 2	23380	-2.22816	-5.25279	3.47e-05	0.000352305
218468_s_at	GREM1	gremlin 1, cysteine knot superfamily, homolog (Xenopus laevis)	26585	-2.22768	-5.46727	2.11e-05	0.000236788
218499_at	RP6-213H19.1	serine/threonine protein kinase MST4	51765	-2.22631	-7.21554	4.52e-07	1.02e-05
205187_at	SMAD5	SMAD family member 5	4090	-2.22595	-3.22327	0.00413278	0.016701
1552680_a_at	CASC5	cancer susceptibility candidate 5	57082	-2.22308	-4.33329	0.000301635	0.00202794
210793_s_at	NUP98	nucleoporin 98kDa	4928	-2.22207	-5.99894	6.3e-06	8.81e-05
236000_s_at	---	---	---	-2.22188	-2.85891	0.00948954	0.0321483
1555772_a_at	CDC25A	cell division cycle 25 homolog A (S. pombe)	993	-2.22125	-5.8329	9.16e-06	0.00012036
213865_at	DCBLD2	discoidin, CUB and LCCL domain containing 2	131566	-2.22039	-4.24029	0.000376174	0.00242092
240168_at	XPO7	exportin 7	23039	-2.22017	-4.37732	0.000271703	0.00186169
232055_at	SFXN1	sideroflexin 1	94081	-2.21929	-6.04371	5.7e-06	8.12e-05
235609_at	---	---	---	-2.21858	-9.79917	3.2e-09	1.82e-07
1557227_s_at	TPR	translocated promoter region (to activated MET oncogene)	7175	-2.21796	-2.68554	0.0139587	0.0433153
200934_at	DEK	DEK oncogene	7913	-2.21757	-8.20732	6.09e-08	1.98e-06
202534_x_at	DHFR	dihydrofolate reductase	1719	-2.21734	-13.4774	1.04e-11	1.63e-09
203213_at	CDC2	cell division cycle 2, G1 to S and G2 to M	983	-2.21729	-11.6035	1.62e-10	1.54e-08
221898_at	PDPN	podoplanin	10630	-2.21711	-10.5211	9.29e-10	6.66e-08
202540_s_at	HMGCR	3-hydroxy-3-methylglutaryl-Coenzyme A reductase	3156	-2.21622	-8.0926	7.63e-08	2.36e-06
204314_s_at	CREB1	cAMP responsive element binding protein 1	1385	-2.215	-7.78558	1.41e-07	3.91e-06
206102_at	GINS1	GINS complex subunit 1 (Psf1 homolog)	9837	-2.21467	-11.6166	1.59e-10	1.51e-08
226534_at	KITLG	KIT ligand	4254	-2.21302	-9.61871	4.39e-09	2.38e-07
206847_s_at	HOXA7	homeobox A7	3204	-2.21243	-6.45156	2.31e-06	3.88e-05
204419_x_at	HBG1 /// HBG2	hemoglobin, gamma A /// hemoglobin, gamma G	3047 /// 3048	-2.21227	-9.16494	9.96e-09	4.49e-07
213624_at	SMPDL3A	sphingomyelin phosphodiesterase, acid-like 3A	10924	-2.21156	-8.84122	1.81e-08	7.27e-07
201129_at	SFRS7	splicing factor, arginine/serine-rich 7, 35kDa	6432	-2.21111	-9.67085	4.01e-09	2.19e-07
212417_at	SCAMP1	secretory carrier membrane protein 1	9522	-2.20969	-3.75641	0.00118552	0.00607456
209465_x_at	PTN	pleiotrophin	5764	-2.20935	-16.3398	2.68e-13	8.99e-11
214815_at	TRIM33	tripartite motif-containing 33	51592	-2.20933	-6.16582	4.34e-06	6.53e-05
204767_s_at	FEN1	flap structure-specific endonuclease 1	2237	-2.20929	-15.5403	7.02e-13	1.84e-10
204863_s_at	IL6ST	interleukin 6 signal transducer (gp130, oncostatin M receptor)	3572	-2.20924	-4.11656	0.000504688	0.00307182
232356_at	---	---	---	-2.20923	-5.32164	2.95e-05	0.000309511
222039_at	KIF18B	kinesin family member 18B	146909	-2.20786	-12.5072	4.14e-11	5.09e-09
213954_at	FAM169A	family with sequence similarity 169, member A	26049	-2.20577	-3.57207	0.00183115	0.00869129
205413_at	MPPED2	metallophosphoesterase domain containing 2	744	-2.20482	-6.5451	1.89e-06	3.29e-05
201454_s_at	NPEPPS	aminopeptidase puromycin sensitive	9520	-2.20424	-6.09454	5.09e-06	7.43e-05
222891_s_at	BCL11A	B-cell CLL/lymphoma 11A (zinc finger protein)	53335	-2.19818	-12.5768	3.74e-11	4.67e-09
204426_at	TMED2	transmembrane emp24 domain trafficking protein 2	10959	-2.19749	-3.90775	0.000828467	0.00457711
221503_s_at	KPNA3	karyopherin alpha 3 (importin alpha 4)	3839	-2.19738	-7.44041	2.84e-07	6.97e-06
217745_s_at	NAT13	N-acetyltransferase 13 (GCN5-related)	80218	-2.19705	-6.60374	1.66e-06	2.99e-05
217562_at	FAM5C	family with sequence similarity 5, member C	339479	-2.1942	-5.78391	1.02e-05	0.00013143
213328_at	NEK1	NIMA (never in mitosis gene a)-related kinase 1	4750	-2.1938	-4.24203	0.000374619	0.00241236
205909_at	POLE2	polymerase (DNA directed), epsilon 2 (p59 subunit)	5427	-2.19308	-9.47662	5.66e-09	2.86e-07
218662_s_at	NCAPG	non-SMC condensin I complex, subunit G	64151	-2.19223	-7.32428	3.6e-07	8.44e-06
202236_s_at	SLC16A1	solute carrier family 16, member 1 (monocarboxylic acid transporter 1)	6566	-2.19206	-5.43198	2.29e-05	0.000251747
208663_s_at	TTC3	tetratricopeptide repeat domain 3	7267	-2.19158	-4.01736	0.000638746	0.00370034
224631_at	ZFP91	zinc finger protein 91 homolog (mouse)	80829	-2.19094	-4.60005	0.000160273	0.00121018
209099_x_at	JAG1	jagged 1 (Alagille syndrome)	182	-2.18947	-8.80078	1.96e-08	7.74e-07
208623_s_at	EZR	ezrin	7430	-2.18801	-18.2928	3e-14	1.53e-11
200842_s_at	EPRS	glutamyl-prolyl-tRNA synthetase	2058	-2.18547	-3.94934	0.000750649	0.00421295
208879_x_at	PRPF6	PRP6 pre-mRNA processing factor 6 homolog (S. cerevisiae)	24148	-2.1841	-2.69552	0.0136547	0.0426024
228791_at	LOC100129502	hypothetical protein LOC100129502	100129502	-2.1817	-6.57381	1.77e-06	3.13e-05
203007_x_at	LYPLA1	lysophospholipase I	10434	-2.1812	-4.35434	0.000286934	0.00194494
201202_at	PCNA	proliferating cell nuclear antigen	5111	-2.18079	-15.797	5.13e-13	1.5e-10
205030_at	FABP7	fatty acid binding protein 7, brain	2173	-2.18063	-13.2302	1.46e-11	2.21e-09
213712_at	ELOVL2	elongation of very long chain fatty acids (FEN1/Elo2, SUR4/Elo3, yeast)-like 2	54898	-2.18045	-5.77483	1.05e-05	0.000133675
224694_at	ANTXR1	anthrax toxin receptor 1	84168	-2.1803	-8.29977	5.09e-08	1.7e-06
218252_at	CKAP2	cytoskeleton associated protein 2	26586	-2.18004	-7.27403	4e-07	9.23e-06
235060_at	LOC100190986	hypothetical LOC100190986	100190986	-2.17987	-5.93394	7.3e-06	9.92e-05
219237_s_at	DNAJB14	DnaJ (Hsp40) homolog, subfamily B, member 14	79982	-2.17908	-5.53288	1.82e-05	0.000209412
212078_s_at	MLL	myeloid/lymphoid or mixed-lineage leukemia (trithorax homolog, Drosophila)	4297	-2.1778	-3.40454	0.00271184	0.0119666
201935_s_at	EIF4G3	eukaryotic translation initiation factor 4 gamma, 3	8672	-2.17543	-9.51484	5.29e-09	2.73e-07
203046_s_at	TIMELESS	timeless homolog (Drosophila)	8914	-2.17416	-13.0954	1.77e-11	2.62e-09
220817_at	TRPC4	transient receptor potential cation channel, subfamily C, member 4	7223	-2.17205	-8.98816	1.38e-08	5.82e-07
230469_at	RTKN2	rhotekin 2	219790	-2.17173	-7.44028	2.84e-07	6.97e-06
218894_s_at	MAGOHB	mago-nashi homolog B (Drosophila)	55110	-2.16935	-11.215	2.99e-10	2.59e-08
212412_at	PDLIM5	PDZ and LIM domain 5	10611	-2.16896	-7.53485	2.34e-07	5.95e-06
201456_s_at	BUB3	budding uninhibited by benzimidazoles 3 homolog (yeast)	9184	-2.16886	-5.06279	5.4e-05	0.000505386
221521_s_at	GINS2	GINS complex subunit 2 (Psf2 homolog)	51659	-2.16849	-14.0272	4.9e-12	8.73e-10
222787_s_at	TMEM106B	transmembrane protein 106B	54664	-2.16816	-3.35387	0.00305209	0.0131685
212634_at	KIAA0776	KIAA0776	23376	-2.16702	-3.29634	0.00348901	0.0146442
229982_at	QSER1	glutamine and serine rich 1	79832	-2.16518	-3.76139	0.00117165	0.00601973
203344_s_at	RBBP8	retinoblastoma binding protein 8	5932	-2.16356	-8.25139	5.59e-08	1.84e-06
201668_x_at	MARCKS	myristoylated alanine-rich protein kinase C substrate	4082	-2.16354	-2.81602	0.0104469	0.0345696
227048_at	LAMA1	laminin, alpha 1	284217	-2.16126	-9.24311	8.63e-09	3.97e-07
204416_x_at	APOC1	apolipoprotein C-I	341	-2.16108	-8.41738	4.05e-08	1.41e-06
235753_at	HOXA7	homeobox A7	3204	-2.15983	-11.4971	1.92e-10	1.76e-08
243543_at	---	---	---	-2.15982	-4.48223	0.00021185	0.0015215
221588_x_at	ALDH6A1	aldehyde dehydrogenase 6 family, member A1	4329	-2.15944	-15.2449	1.01e-12	2.51e-10
203753_at	TCF4	transcription factor 4	6925	-2.15761	-3.62241	0.00162656	0.00789356
211967_at	TMEM123	transmembrane protein 123	114908	-2.15508	-6.75245	1.2e-06	2.28e-05
209366_x_at	CYB5A	cytochrome b5 type A (microsomal)	1528	-2.15491	-16.6407	1.89e-13	6.67e-11
205394_at	CHEK1	CHK1 checkpoint homolog (S. pombe)	1111	-2.15323	-7.54391	2.29e-07	5.87e-06
221685_s_at	CCDC99	coiled-coil domain containing 99	54908	-2.15274	-6.30249	3.21e-06	5.09e-05
214723_x_at	ANKRD36	ankyrin repeat domain 36	375248	-2.15202	-3.74108	0.00122927	0.00626186
222747_s_at	SCML1	sex comb on midleg-like 1 (Drosophila)	6322	-2.15135	-6.95509	7.82e-07	1.61e-05
201299_s_at	MOBKL1B	MOB1, Mps One Binder kinase activator-like 1B (yeast)	55233	-2.15068	-5.15736	4.33e-05	0.000422515
205733_at	BLM	Bloom syndrome, RecQ helicase-like	641	-2.14984	-5.68517	1.28e-05	0.000157365
208622_s_at	EZR	ezrin	7430	-2.14753	-10.0355	2.12e-09	1.3e-07
205029_s_at	FABP7	fatty acid binding protein 7, brain	2173	-2.14703	-6.8008	1.09e-06	2.1e-05
202082_s_at	SEC14L1	SEC14-like 1 (S. cerevisiae)	6397	-2.14631	-5.38794	2.53e-05	0.000272983
215513_at	HYMAI	hydatidiform mole associated and imprinted (non-protein coding)	57061	-2.14586	-8.43833	3.89e-08	1.36e-06
205967_at	HIST1H4C	histone cluster 1, H4c	8364	-2.14517	-4.99042	6.39e-05	0.000578136
233655_s_at	HAUS6	HAUS augmin-like complex, subunit 6	54801	-2.14411	-3.23091	0.00406036	0.0164768
214709_s_at	KTN1	kinectin 1 (kinesin receptor)	3895	-2.14189	-9.72196	3.66e-09	2.04e-07
224875_at	C5orf24	chromosome 5 open reading frame 24	134553	-2.1418	-3.89346	0.000857015	0.00470416
202539_s_at	HMGCR	3-hydroxy-3-methylglutaryl-Coenzyme A reductase	3156	-2.14147	-11.023	4.07e-10	3.32e-08
228998_at	TNRC6B	trinucleotide repeat containing 6B	23112	-2.14052	-4.25602	0.000362377	0.00234667
228033_at	E2F7	E2F transcription factor 7	144455	-2.14009	-7.92111	1.07e-07	3.16e-06
208711_s_at	CCND1	cyclin D1	595	-2.13947	-3.29352	0.00351192	0.0147301
210852_s_at	AASS	aminoadipate-semialdehyde synthase	10157	-2.13613	-7.49899	2.51e-07	6.35e-06
212076_at	MLL	myeloid/lymphoid or mixed-lineage leukemia (trithorax homolog, Drosophila)	4297	-2.13552	-4.91147	7.69e-05	0.00067343
220651_s_at	MCM10	minichromosome maintenance complex component 10	55388	-2.13546	-7.67982	1.74e-07	4.64e-06
241803_s_at	LOC100130623	hypothetical protein LOC100130623	100130623	-2.13417	-8.86948	1.72e-08	6.99e-07
238440_at	CLYBL	citrate lyase beta like	171425	-2.13374	-11.9741	9.18e-11	9.54e-09
201503_at	G3BP1	GTPase activating protein (SH3 domain) binding protein 1	10146	-2.13345	-6.9842	7.35e-07	1.53e-05
206965_at	KLF12	Kruppel-like factor 12	11278	-2.13214	-6.94574	7.97e-07	1.63e-05
210094_s_at	PARD3	par-3 partitioning defective 3 homolog (C. elegans)	56288	-2.12993	-5.66572	1.34e-05	0.000162445
212709_at	NUP160	nucleoporin 160kDa	23279	-2.12882	-7.34759	3.43e-07	8.15e-06
222850_s_at	DNAJB14	DnaJ (Hsp40) homolog, subfamily B, member 14	79982	-2.12447	-4.39488	0.000260613	0.00180103
232878_at	LOC644192	hypothetical LOC644192	644192	-2.12368	-8.61707	2.77e-08	1.03e-06
211090_s_at	PRPF4B	PRP4 pre-mRNA processing factor 4 homolog B (yeast)	8899	-2.12305	-2.94774	0.00776657	0.0274218
201589_at	SMC1A	structural maintenance of chromosomes 1A	8243	-2.12175	-16.651	1.86e-13	6.66e-11
226223_at	---	---	---	-2.12137	-7.83988	1.26e-07	3.59e-06
210095_s_at	IGFBP3	insulin-like growth factor binding protein 3	3486	-2.12101	-12.5377	3.96e-11	4.9e-09
201859_at	SRGN	serglycin	5552	-2.12046	-8.2268	5.86e-08	1.91e-06
211993_at	WNK1	WNK lysine deficient protein kinase 1	65125	-2.11965	-5.46375	2.13e-05	0.000237899
240370_at	---	---	---	-2.1191	-6.51626	2.01e-06	3.46e-05
227498_at	SOX6	SRY (sex determining region Y)-box 6	55553	-2.11904	-9.38763	6.64e-09	3.25e-07
206928_at	ZNF124	zinc finger protein 124	7678	-2.11902	-5.57345	1.65e-05	0.000193305
210950_s_at	FDFT1	farnesyl-diphosphate farnesyltransferase 1	2222	-2.11777	-10.7455	6.4e-10	4.86e-08
214545_s_at	PROSC	proline synthetase co-transcribed homolog (bacterial)	11212	-2.11758	-7.84706	1.24e-07	3.56e-06
223162_s_at	KIAA1147	KIAA1147	57189	-2.11619	-11.6527	1.5e-10	1.45e-08
225660_at	SEMA6A	sema domain, transmembrane domain (TM), and cytoplasmic domain, (semaphorin) 6A	57556	-2.11479	-5.27026	3.33e-05	0.000340785
227812_at	TNFRSF19	tumor necrosis factor receptor superfamily, member 19	55504	-2.11327	-8.80777	1.93e-08	7.67e-07
209146_at	SC4MOL	sterol-C4-methyl oxidase-like	6307	-2.11211	-11.3761	2.32e-10	2.06e-08
230892_at	---	---	---	-2.11176	-8.39011	4.27e-08	1.47e-06
223307_at	CDCA3	cell division cycle associated 3	83461	-2.11082	-15.4651	7.7e-13	1.95e-10
205339_at	STIL	SCL/TAL1 interrupting locus	6491	-2.10976	-9.99531	2.27e-09	1.36e-07
235709_at	GAS2L3	growth arrest-specific 2 like 3	283431	-2.10921	-5.27415	3.3e-05	0.000338474
227947_at	PHACTR2	phosphatase and actin regulator 2	9749	-2.10889	-8.69259	2.4e-08	9.06e-07
1552619_a_at	ANLN	anillin, actin binding protein	54443	-2.10842	-4.40093	0.0002569	0.00178131
225827_at	EIF2C2	eukaryotic translation initiation factor 2C, 2	27161	-2.10818	-9.19971	9.34e-09	4.24e-07
232125_at	---	---	---	-2.10741	-4.06835	0.00056592	0.00336439
228289_at	---	---	---	-2.10586	-6.04295	5.71e-06	8.13e-05
214843_s_at	USP33	ubiquitin specific peptidase 33	23032	-2.10573	-3.22122	0.00415239	0.0167519
210840_s_at	IQGAP1	IQ motif containing GTPase activating protein 1	8826	-2.10529	-6.60065	1.67e-06	3.01e-05
228665_at	CYYR1	cysteine/tyrosine-rich 1	116159	-2.10507	-5.76657	1.07e-05	0.000135622
215936_s_at	KIAA1033	KIAA1033	23325	-2.1047	-3.85932	0.000929232	0.0050176
236429_at	ZNF83	zinc finger protein 83	55769	-2.10458	-6.63887	1.54e-06	2.8e-05
207966_s_at	GLG1	golgi apparatus protein 1	2734	-2.10419	-7.32597	3.59e-07	8.42e-06
206935_at	PCDH8	protocadherin 8	5100	-2.10414	-12.604	3.59e-11	4.52e-09
45633_at	GINS3	GINS complex subunit 3 (Psf3 homolog)	64785	-2.10402	-10.0537	2.05e-09	1.26e-07
209891_at	SPC25	SPC25, NDC80 kinetochore complex component, homolog (S. cerevisiae)	57405	-2.10399	-13.1258	1.7e-11	2.52e-09
204258_at	CHD1	chromodomain helicase DNA binding protein 1	1105	-2.10348	-5.93055	7.35e-06	9.98e-05
218236_s_at	PRKD3	protein kinase D3	23683	-2.10346	-6.00266	6.25e-06	8.75e-05
228628_at	SRGAP2P1	SLIT-ROBO Rho GTPase activating protein 2 pseudogene 1	653464	-2.10338	-5.57011	1.67e-05	0.000194649
217834_s_at	SYNCRIP	synaptotagmin binding, cytoplasmic RNA interacting protein	10492	-2.10335	-12.2167	6.37e-11	7.17e-09
218602_s_at	HAUS6	HAUS augmin-like complex, subunit 6	54801	-2.10216	-5.87041	8.42e-06	0.000112085
204886_at	PLK4	polo-like kinase 4 (Drosophila)	10733	-2.10016	-6.59409	1.7e-06	3.03e-05
203214_x_at	CDC2	cell division cycle 2, G1 to S and G2 to M	983	-2.09975	-11.5291	1.82e-10	1.7e-08
213235_at	C16orf88	chromosome 16 open reading frame 88	400506	-2.09972	-3.98227	0.000694234	0.00396037
203638_s_at	FGFR2	fibroblast growth factor receptor 2	2263	-2.09968	-7.41637	2.98e-07	7.23e-06
209267_s_at	SLC39A8	solute carrier family 39 (zinc transporter), member 8	64116	-2.0992	-4.92669	7.42e-05	0.00065383
205296_at	RBL1	retinoblastoma-like 1 (p107)	5933	-2.09572	-7.2383	4.31e-07	9.81e-06
212687_at	LIMS1	LIM and senescent cell antigen-like domains 1	3987	-2.09564	-9.34225	7.21e-09	3.48e-07
221258_s_at	KIF18A	kinesin family member 18A	81930	-2.09506	-4.54594	0.000182172	0.00134542
39248_at	AQP3	aquaporin 3 (Gill blood group)	360	-2.09357	-10.4686	1.01e-09	7.15e-08
211085_s_at	STK4	serine/threonine kinase 4	6789	-2.09336	-2.80575	0.0106896	0.0351709
212698_s_at	2011-09-10	septin 10	151011	-2.09304	-8.29033	5.18e-08	1.72e-06
218875_s_at	FBXO5	F-box protein 5	26271	-2.09299	-8.54741	3.16e-08	1.14e-06
213342_at	YAP1	Yes-associated protein 1, 65kDa	10413	-2.09135	-8.80904	1.93e-08	7.66e-07
213325_at	PVRL3	poliovirus receptor-related 3	25945	-2.09094	-4.84105	9.08e-05	0.000768132
1555037_a_at	IDH1	isocitrate dehydrogenase 1 (NADP+), soluble	3417	-2.09093	-9.49312	5.5e-09	2.81e-07
214352_s_at	KRAS	v-Ki-ras2 Kirsten rat sarcoma viral oncogene homolog	3845	-2.09017	-3.13307	0.00508805	0.0196587
209788_s_at	ERAP1	endoplasmic reticulum aminopeptidase 1	51752	-2.08974	-9.55828	4.89e-09	2.57e-07
229274_at	GNAS	GNAS complex locus	2778	-2.08913	-4.42222	0.000244243	0.00171103
212865_s_at	COL14A1	collagen, type XIV, alpha 1	7373	-2.08898	-5.32937	2.9e-05	0.000305346
205961_s_at	PSIP1	PC4 and SFRS1 interacting protein 1	11168	-2.08638	-5.63566	1.43e-05	0.000171716
203819_s_at	IGF2BP3	insulin-like growth factor 2 mRNA binding protein 3	10643	-2.0846	-13.0923	1.78e-11	2.62e-09
202011_at	TJP1	tight junction protein 1 (zona occludens 1)	7082	-2.08397	-10.3519	1.23e-09	8.37e-08
216449_x_at	HSP90B1	heat shock protein 90kDa beta (Grp94), member 1	7184	-2.08294	-3.92091	0.00080301	0.00446018
203362_s_at	MAD2L1	MAD2 mitotic arrest deficient-like 1 (yeast)	4085	-2.08136	-15.7219	5.62e-13	1.59e-10
218987_at	ATF7IP	activating transcription factor 7 interacting protein	55729	-2.07927	-11.6583	1.49e-10	1.45e-08
219555_s_at	CENPN	centromere protein N	55839	-2.07855	-9.22438	8.93e-09	4.09e-07
218435_at	DNAJC15	DnaJ (Hsp40) homolog, subfamily C, member 15	29103	-2.07852	-12.6903	3.17e-11	4.07e-09
232028_at	ZNF678	zinc finger protein 678	339500	-2.07784	-4.13434	0.000483822	0.00296838
226092_at	MPP5	membrane protein, palmitoylated 5 (MAGUK p55 subfamily member 5)	64398	-2.07752	-6.46555	2.24e-06	3.78e-05
225361_x_at	FAM122B	family with sequence similarity 122B	159090	-2.07692	-5.79874	9.9e-06	0.000127804
223283_s_at	TSHZ1	teashirt zinc finger homeobox 1	10194	-2.07583	-9.48268	5.6e-09	2.84e-07
205393_s_at	CHEK1	CHK1 checkpoint homolog (S. pombe)	1111	-2.07537	-7.68258	1.73e-07	4.62e-06
203022_at	RNASEH2A	ribonuclease H2, subunit A	10535	-2.07536	-8.86813	1.72e-08	6.99e-07
204948_s_at	FST	follistatin	10468	-2.07498	-12.3698	5.07e-11	6.11e-09
225834_at	FAM72A /// FAM72B /// FAM72D	family with sequence similarity 72, member A /// family with sequence similarity 72, member B /// family with sequence similarity 72, member D	653820 /// 728833 /// 729533	-2.07307	-10.4206	1.1e-09	7.68e-08
224320_s_at	MCM8	minichromosome maintenance complex component 8	84515	-2.07229	-6.49623	2.1e-06	3.58e-05
227931_at	INO80D	INO80 complex subunit D	54891	-2.07193	-5.91866	7.55e-06	0.000101962
203387_s_at	TBC1D4	TBC1 domain family, member 4	9882	-2.07167	-6.54705	1.88e-06	3.28e-05
201752_s_at	ADD3	adducin 3 (gamma)	120	-2.07129	-8.86621	1.73e-08	6.99e-07
200890_s_at	SSR1	signal sequence receptor, alpha	6745	-2.07078	-6.83206	1.02e-06	1.99e-05
216048_s_at	RHOBTB3	Rho-related BTB domain containing 3	22836	-2.06875	-8.06794	8.01e-08	2.46e-06
203649_s_at	PLA2G2A	phospholipase A2, group IIA (platelets, synovial fluid)	5320	-2.06845	-6.94902	7.92e-07	1.62e-05
1563467_at	---	---	---	-2.06794	-5.88616	8.13e-06	0.000108513
211992_at	WNK1	WNK lysine deficient protein kinase 1	65125	-2.06642	-11.2338	2.9e-10	2.53e-08
243509_at	---	---	---	-2.06618	-8.10306	7.47e-08	2.33e-06
242652_at	---	---	---	-2.0656	-3.04952	0.00616147	0.0228652
201514_s_at	G3BP1	GTPase activating protein (SH3 domain) binding protein 1	10146	-2.06482	-4.91624	7.61e-05	0.000667193
227361_at	HS3ST3B1	heparan sulfate (glucosamine) 3-O-sulfotransferase 3B1	9953	-2.06349	-6.10824	4.94e-06	7.26e-05
204023_at	RFC4	replication factor C (activator 1) 4, 37kDa	5984	-2.063	-11.9143	1.01e-10	1.03e-08
221796_at	NTRK2	neurotrophic tyrosine kinase, receptor, type 2	4915	-2.06288	-11.4651	2.01e-10	1.82e-08
241790_at	---	---	---	-2.06261	-6.0668	5.42e-06	7.81e-05
212023_s_at	MKI67	antigen identified by monoclonal antibody Ki-67	4288	-2.06258	-10.3875	1.16e-09	8.02e-08
237356_at	---	---	---	-2.06232	-7.14582	5.23e-07	1.15e-05
230883_at	NXPH2	neurexophilin 2	11249	-2.0619	-7.14119	5.28e-07	1.16e-05
205882_x_at	ADD3	adducin 3 (gamma)	120	-2.0614	-10.2294	1.52e-09	9.9e-08
240259_at	FLRT2	Fibronectin leucine rich transmembrane protein 2	23768	-2.06054	-6.20704	3.96e-06	6.08e-05
223413_s_at	LYAR	Ly1 antibody reactive homolog (mouse)	55646	-2.06047	-5.92829	7.39e-06	0.000100153
1558251_a_at	ZNF587	zinc finger protein 587	84914	-2.06045	-2.79766	0.0108845	0.0356878
218353_at	RGS5	regulator of G-protein signaling 5	8490	-2.0599	-8.43265	3.94e-08	1.37e-06
218170_at	ISOC1	isochorismatase domain containing 1	51015	-2.0594	-11.3706	2.34e-10	2.07e-08
205338_s_at	DCT	dopachrome tautomerase (dopachrome delta-isomerase, tyrosine-related protein 2)	1638	-2.05841	-7.59864	2.05e-07	5.33e-06
242025_at	---	---	---	-2.05833	-6.27054	3.44e-06	5.41e-05
203434_s_at	MME	membrane metallo-endopeptidase	4311	-2.05747	-6.82146	1.04e-06	2.02e-05
229638_at	IRX3	iroquois homeobox 3	79191	-2.05742	-8.74222	2.18e-08	8.41e-07
207828_s_at	CENPF	centromere protein F, 350/400ka (mitosin)	1063	-2.05693	-7.85486	1.22e-07	3.51e-06
225093_at	UTRN	utrophin	7402	-2.05663	-9.93305	2.53e-09	1.51e-07
208975_s_at	KPNB1	karyopherin (importin) beta 1	3837	-2.05511	-9.0769	1.17e-08	5.11e-07
209225_x_at	TNPO1	transportin 1	3842	-2.05361	-6.51965	1.99e-06	3.43e-05
222036_s_at	MCM4	minichromosome maintenance complex component 4	4173	-2.05326	-12.8884	2.38e-11	3.29e-09
228559_at	CENPN	centromere protein N	55839	-2.0532	-12.5033	4.16e-11	5.1e-09
206668_s_at	SCAMP1	secretory carrier membrane protein 1	9522	-2.0531	-3.27261	0.00368655	0.0152756
212350_at	TBC1D1	TBC1 (tre-2/USP6, BUB2, cdc16) domain family, member 1	23216	-2.05232	-10.4487	1.05e-09	7.36e-08
202206_at	ARL4C	ADP-ribosylation factor-like 4C	10123	-2.05193	-7.36206	3.33e-07	7.95e-06
217802_s_at	NUCKS1	nuclear casein kinase and cyclin-dependent kinase substrate 1	64710	-2.05138	-9.48996	5.53e-09	2.82e-07
219221_at	ZBTB38	zinc finger and BTB domain containing 38	253461	-2.05071	-5.1513	4.39e-05	0.000427097
215794_x_at	GLUD2	glutamate dehydrogenase 2	2747	-2.04818	-8.25097	5.59e-08	1.84e-06
215206_at	---	---	---	-2.04816	-3.97939	0.000698981	0.00397984
238706_at	PAPD4	PAP associated domain containing 4	167153	-2.04776	-2.66608	0.0145699	0.0447113
226332_at	FAM133B /// LOC728153	family with sequence similarity 133, member B /// similar to FAM133B protein	257415 /// 728153	-2.04757	-9.57409	4.76e-09	2.52e-07
203448_s_at	TERF1	telomeric repeat binding factor (NIMA-interacting) 1	7013	-2.04681	-7.77778	1.43e-07	3.96e-06
218096_at	AGPAT5	1-acylglycerol-3-phosphate O-acyltransferase 5 (lysophosphatidic acid acyltransferase, epsilon)	55326	-2.04617	-6.75078	1.21e-06	2.28e-05
232064_at	---	---	---	-2.04523	-4.47417	0.00021594	0.0015457
222106_at	PRND	prion protein 2 (dublet)	23627	-2.04506	-6.51753	2e-06	3.45e-05
221830_at	RAP2A	RAP2A, member of RAS oncogene family	5911	-2.04481	-3.02336	0.00654054	0.0240145
204624_at	ATP7B	ATPase, Cu++ transporting, beta polypeptide	540	-2.04472	-9.50188	5.41e-09	2.78e-07
221606_s_at	NSBP1	nucleosomal binding protein 1	79366	-2.04441	-9.61394	4.43e-09	2.39e-07
244419_at	FRZB	Frizzled-related protein	2487	-2.04254	-5.69143	1.26e-05	0.000155721
205020_s_at	ARL4A	ADP-ribosylation factor-like 4A	10124	-2.0417	-15.1854	1.09e-12	2.64e-10
217826_s_at	UBE2J1	ubiquitin-conjugating enzyme E2, J1 (UBC6 homolog, yeast)	51465	-2.04075	-5.18498	4.06e-05	0.000400014
226814_at	ADAMTS9	ADAM metallopeptidase with thrombospondin type 1 motif, 9	56999	-2.03975	-8.75461	2.13e-08	8.26e-07
233587_s_at	SIPA1L2	signal-induced proliferation-associated 1 like 2	57568	-2.03905	-7.422	2.94e-07	7.17e-06
216973_s_at	HOXB7	homeobox B7	3217	-2.03806	-7.48508	2.59e-07	6.49e-06
209408_at	KIF2C	kinesin family member 2C	11004	-2.03754	-12.1191	7.37e-11	8.05e-09
231866_at	LNPEP	leucyl/cystinyl aminopeptidase	4012	-2.03678	-5.29405	3.15e-05	0.000325809
203319_s_at	ZNF148	zinc finger protein 148	7707	-2.03584	-5.65903	1.36e-05	0.000164446
201446_s_at	TIA1	TIA1 cytotoxic granule-associated RNA binding protein	7072	-2.03572	-4.14457	0.000472203	0.00291374
213647_at	DNA2	DNA replication helicase 2 homolog (yeast)	1763	-2.03488	-7.25399	4.17e-07	9.57e-06
223463_at	RAB23	RAB23, member RAS oncogene family	51715	-2.03348	-7.11705	5.55e-07	1.21e-05
209723_at	SERPINB9	serpin peptidase inhibitor, clade B (ovalbumin), member 9	5272	-2.03284	-12.2244	6.29e-11	7.11e-09
213188_s_at	MINA	MYC induced nuclear antigen	84864	-2.03276	-10.7526	6.33e-10	4.82e-08
205084_at	BCAP29	B-cell receptor-associated protein 29	55973	-2.03032	-7.62632	1.94e-07	5.09e-06
223818_s_at	RSF1	remodeling and spacing factor 1	51773	-2.02994	-3.75473	0.00119026	0.00609496
229551_x_at	ZNF367	zinc finger protein 367	195828	-2.02989	-5.44687	2.21e-05	0.000245019
204463_s_at	EDNRA	endothelin receptor type A	1909	-2.02955	-3.824	0.00101031	0.00536457
1555725_a_at	RGS5	regulator of G-protein signaling 5	8490	-2.02932	-3.41668	0.00263601	0.0117073
225640_at	LOC401504	hypothetical gene supported by AK091718	401504	-2.02907	-3.52904	0.00202599	0.00942164
223059_s_at	FAM107B	family with sequence similarity 107, member B	83641	-2.02849	-5.06861	5.32e-05	0.000499142
226769_at	FIBIN	fin bud initiation factor homolog (zebrafish)	387758	-2.02793	-7.5039	2.49e-07	6.29e-06
231403_at	TRIO	Triple functional domain (PTPRF interacting)	7204	-2.02778	-6.75082	1.21e-06	2.28e-05
218350_s_at	GMNN	geminin, DNA replication inhibitor	51053	-2.02762	-13.2117	1.5e-11	2.24e-09
201914_s_at	SEC63	SEC63 homolog (S. cerevisiae)	11231	-2.02683	-8.13601	7.01e-08	2.21e-06
204887_s_at	PLK4	polo-like kinase 4 (Drosophila)	10733	-2.02663	-4.47937	0.000213291	0.00152912
209337_at	PSIP1	PC4 and SFRS1 interacting protein 1	11168	-2.02656	-6.97225	7.54e-07	1.56e-05
201476_s_at	RRM1	ribonucleotide reductase M1	6240	-2.02656	-8.57784	2.98e-08	1.09e-06
211423_s_at	SC5DL	sterol-C5-desaturase (ERG3 delta-5-desaturase homolog, S. cerevisiae)-like	6309	-2.0265	-11.7067	1.38e-10	1.37e-08
200665_s_at	SPARC	secreted protein, acidic, cysteine-rich (osteonectin)	6678	-2.02602	-16.61	1.95e-13	6.84e-11
228045_at	---	---	---	-2.02585	-6.33993	2.95e-06	4.77e-05
228335_at	CLDN11	claudin 11	5010	-2.02489	-7.81718	1.32e-07	3.72e-06
209088_s_at	UBN1	ubinuclein 1	29855	-2.02421	-2.9265	0.00814887	0.0284658
225627_s_at	CACHD1	cache domain containing 1	57685	-2.02369	-7.20006	4.67e-07	1.04e-05
205666_at	FMO1	flavin containing monooxygenase 1	2326	-2.02341	-9.33827	7.26e-09	3.5e-07
1553349_at	ARID2	AT rich interactive domain 2 (ARID, RFX-like)	196528	-2.02278	-7.46629	2.69e-07	6.69e-06
212926_at	SMC5	structural maintenance of chromosomes 5	23137	-2.02183	-4.00743	0.000653989	0.00376966
240417_at	---	---	---	-2.02072	-5.47212	2.09e-05	0.000234735
234863_x_at	FBXO5	F-box protein 5	26271	-2.02013	-9.54489	5.01e-09	2.62e-07
236841_at	LOC100133859	hypothetical protein LOC100133859	100133859	-2.01964	-4.82718	9.38e-05	0.000788226
231855_at	KIAA1524	KIAA1524	57650	-2.01895	-7.47281	2.65e-07	6.61e-06
225806_at	JUB	jub, ajuba homolog (Xenopus laevis)	84962	-2.01763	-13.6052	8.69e-12	1.41e-09
208664_s_at	TTC3	tetratricopeptide repeat domain 3	7267	-2.01662	-5.99146	6.41e-06	8.94e-05
202905_x_at	NBN	nibrin	4683	-2.01518	-4.77636	0.00010569	0.000869609
1569472_s_at	TTC3	tetratricopeptide repeat domain 3	7267	-2.01394	-2.83698	0.00996819	0.0333661
1568618_a_at	GALNT1	UDP-N-acetyl-alpha-D-galactosamine:polypeptide N-acetylgalactosaminyltransferase 1 (GalNAc-T1)	2589	-2.01392	-5.175	4.15e-05	0.000408232
1561135_at	---	---	---	-2.0122	-9.52213	5.22e-09	2.71e-07
222538_s_at	APPL1	adaptor protein, phosphotyrosine interaction, PH domain and leucine zipper containing 1	26060	-2.0119	-3.34347	0.00312685	0.0134227
240625_at	---	---	---	-2.00975	-6.04533	5.68e-06	8.09e-05
222420_s_at	UBE2H	ubiquitin-conjugating enzyme E2H (UBC8 homolog, yeast)	7328	-2.00941	-5.44414	2.23e-05	0.00024631
201924_at	AFF1	AF4/FMR2 family, member 1	4299	-2.00916	-9.77822	3.32e-09	1.87e-07
222473_s_at	ERBB2IP	erbb2 interacting protein	55914	-2.00882	-5.31175	3.02e-05	0.00031525
222958_s_at	DEPDC1	DEP domain containing 1	55635	-2.007	-5.41468	2.38e-05	0.000260216
206114_at	EPHA4	EPH receptor A4	2043	-2.00657	-4.42524	0.000242504	0.00170144
229036_at	TNRC6B	trinucleotide repeat containing 6B	23112	-2.00479	-4.38214	0.000268613	0.00184562
238761_at	---	---	---	-2.0036	-4.91685	7.59e-05	0.000666426
240146_at	---	---	---	-2.00306	-4.77322	0.000106478	0.000875192
212487_at	GPATCH8	G patch domain containing 8	23131	-2.00292	-4.63848	0.000146351	0.00112645
224918_x_at	MGST1	microsomal glutathione S-transferase 1	4257	-2.00139	-12.3938	4.89e-11	5.92e-09
229073_at	PRTG	protogenin homolog (Gallus gallus)	283659	-2.00071	-7.46888	2.67e-07	6.66e-06
230229_at	DLG1	Discs, large homolog 1 (Drosophila)	1739	-2.00024	-7.43418	2.87e-07	7.05e-06
229331_at	SPATA18	spermatogenesis associated 18 homolog (rat)	132671	2.00499	4.75534	0.00011106	0.000907069
1568612_at	GABRG2	gamma-aminobutyric acid (GABA) A receptor, gamma 2	2566	2.00791	4.7021	0.000125927	0.00100058
224602_at	C4orf3	chromosome 4 open reading frame 3	401152	2.00884	5.81122	9.63e-06	0.000125086
239218_at	PDE1C	phosphodiesterase 1C, calmodulin-dependent 70kDa	5137	2.00955	7.26742	4.06e-07	9.35e-06
243481_at	RHOJ	ras homolog gene family, member J	57381	2.01094	8.7165	2.29e-08	8.74e-07
218899_s_at	BAALC	brain and acute leukemia, cytoplasmic	79870	2.01182	6.90809	8.64e-07	1.73e-05
219463_at	C20orf103	chromosome 20 open reading frame 103	24141	2.01353	10.8495	5.4e-10	4.24e-08
239767_at	---	---	---	2.01426	5.92229	7.49e-06	0.000101301
209990_s_at	GABBR2	gamma-aminobutyric acid (GABA) B receptor, 2	9568	2.01751	7.0236	6.76e-07	1.43e-05
235264_at	HCFC2	host cell factor C2	29915	2.0192	4.83124	9.29e-05	0.000782162
238018_at	FAM150B	family with sequence similarity 150, member B	285016	2.0218	7.09065	5.87e-07	1.27e-05
243339_at	---	---	---	2.02595	5.20192	3.9e-05	0.000387223
235916_at	YPEL4	yippee-like 4 (Drosophila)	219539	2.0329	7.07086	6.12e-07	1.32e-05
232289_at	KCNJ12	potassium inwardly-rectifying channel, subfamily J, member 12	3768	2.03297	10.3137	1.32e-09	8.71e-08
237134_at	---	---	---	2.03475	5.9945	6.37e-06	8.9e-05
238697_at	NCRNA00086	Non-protein coding RNA 86	399668	2.03548	8.53036	3.26e-08	1.17e-06
205651_x_at	RAPGEF4	Rap guanine nucleotide exchange factor (GEF) 4	11069	2.03791	8.19829	6.2e-08	2e-06
230497_at	BRUNOL5	bruno-like 5, RNA binding protein (Drosophila)	60680	2.0384	7.48573	2.58e-07	6.49e-06
227202_at	CNTN1	Contactin 1	1272	2.04165	4.90371	7.83e-05	0.000683398
236685_at	---	---	---	2.042	9.10541	1.11e-08	4.91e-07
204547_at	RAB40B	RAB40B, member RAS oncogene family	10966	2.05001	10.2259	1.53e-09	9.94e-08
228115_at	---	---	---	2.05179	7.01953	6.82e-07	1.44e-05
211959_at	IGFBP5	insulin-like growth factor binding protein 5	3488	2.05347	14.5696	2.4e-12	4.88e-10
215855_s_at	TMF1	TATA element modulatory factor 1	7110	2.05552	8.74909	2.15e-08	8.32e-07
218720_x_at	LOC652900 /// SEZ6L2	similar to seizure related 6 homolog (mouse)-like 2 isoform 1 /// seizure related 6 homolog (mouse)-like 2	26470 /// 652900	2.05706	7.02712	6.71e-07	1.42e-05
228749_at	ZDBF2	zinc finger, DBF-type containing 2	57683	2.05719	8.60741	2.82e-08	1.04e-06
214956_at	AAK1	AP2 associated kinase 1	22848	2.06379	7.64157	1.88e-07	4.96e-06
209159_s_at	NDRG4	NDRG family member 4	65009	2.06492	7.43083	2.89e-07	7.07e-06
238919_at	---	---	---	2.06621	8.15236	6.78e-08	2.15e-06
210033_s_at	SPAG6	sperm associated antigen 6	9576	2.06781	5.47081	2.09e-05	0.000235357
205630_at	CRH	corticotropin releasing hormone	1392	2.07009	13.9761	5.25e-12	9.29e-10
225481_at	FRMD6	FERM domain containing 6	122786	2.07039	5.49809	1.97e-05	0.000223781
229057_at	SCN2A	sodium channel, voltage-gated, type II, alpha subunit	6326	2.07183	5.82034	9.43e-06	0.000123127
230143_at	RNF165	ring finger protein 165	494470	2.07466	13.7903	6.75e-12	1.15e-09
202952_s_at	ADAM12	ADAM metallopeptidase domain 12	8038	2.07571	10.3483	1.24e-09	8.39e-08
239556_at	LOC645513	Hypothetical LOC645513	645513	2.07863	8.47606	3.62e-08	1.28e-06
217168_s_at	HERPUD1	homocysteine-inducible, endoplasmic reticulum stress-inducible, ubiquitin-like domain member 1	9709	2.07902	16.5362	2.13e-13	7.37e-11
1553655_at	CDC20B	cell division cycle 20 homolog B (S. cerevisiae)	166979	2.08195	8.94333	1.5e-08	6.26e-07
200822_x_at	TPI1	triosephosphate isomerase 1	7167	2.08541	8.58278	2.95e-08	1.09e-06
209700_x_at	PDE4DIP	phosphodiesterase 4D interacting protein	9659	2.08574	7.9382	1.04e-07	3.08e-06
228109_at	RASGRF2	Ras protein-specific guanine nucleotide-releasing factor 2	5924	2.08739	10.8134	5.73e-10	4.45e-08
221950_at	EMX2	empty spiracles homeobox 2	2018	2.08999	10.0032	2.24e-09	1.35e-07
230495_at	LOC150568	hypothetical LOC150568	150568	2.09297	8.05408	8.23e-08	2.52e-06
201251_at	PKM2	pyruvate kinase, muscle	5315	2.09594	7.95299	1.01e-07	3.01e-06
216929_x_at	ABO	ABO blood group (transferase A, alpha 1-3-N-acetylgalactosaminyltransferase; transferase B, alpha 1-3-galactosyltransferase)	28	2.10475	6.82243	1.04e-06	2.02e-05
213849_s_at	PPP2R2B	protein phosphatase 2 (formerly 2A), regulatory subunit B, beta isoform	5521	2.10544	8.69633	2.38e-08	9.02e-07
204567_s_at	ABCG1	ATP-binding cassette, sub-family G (WHITE), member 1	9619	2.11084	11.0953	3.63e-10	3.02e-08
238047_at	RP13-102H20.1	hypothetical protein FLJ30058	158763	2.11144	8.17175	6.53e-08	2.09e-06
207076_s_at	ASS1	argininosuccinate synthetase 1	445	2.11264	11.6957	1.41e-10	1.39e-08
212171_x_at	VEGFA	vascular endothelial growth factor A	7422	2.11423	9.29533	7.85e-09	3.72e-07
204763_s_at	GNAO1	guanine nucleotide binding protein (G protein), alpha activating activity polypeptide O	2775	2.11692	10.0293	2.14e-09	1.31e-07
238906_s_at	RHOJ	ras homolog gene family, member J	57381	2.12458	11.4646	2.02e-10	1.82e-08
219714_s_at	CACNA2D3	calcium channel, voltage-dependent, alpha 2/delta subunit 3	55799	2.14207	7.68104	1.74e-07	4.63e-06
1553976_a_at	RP11-529I10.4	deleted in a mouse model of primary ciliary dyskinesia	25911	2.15315	9.48378	5.59e-09	2.84e-07
213011_s_at	TPI1	triosephosphate isomerase 1	7167	2.15414	8.86546	1.73e-08	6.99e-07
228239_at	FAM165B	family with sequence similarity 165, member B	54065	2.15419	13.7287	7.34e-12	1.22e-09
220269_at	ZBBX	zinc finger, B-box domain containing	79740	2.15721	9.28669	7.97e-09	3.76e-07
214844_s_at	DOK5	docking protein 5	55816	2.1587	13.0217	1.97e-11	2.83e-09
1562102_at	AKR1C1	Aldo-keto reductase family 1, member C1 (dihydrodiol dehydrogenase 1; 20-alpha (3-alpha)-hydroxysteroid dehydrogenase)	1645	2.16233	6.09538	5.08e-06	7.42e-05
204730_at	RIMS3	regulating synaptic membrane exocytosis 3	9783	2.16314	11.8352	1.13e-10	1.15e-08
238662_at	ATPBD4	ATP binding domain 4	89978	2.1657	11.3897	2.27e-10	2.03e-08
232113_at	---	---	---	2.1774	10.0452	2.08e-09	1.28e-07
206023_at	NMU	neuromedin U	10874	2.17969	9.27163	8.19e-09	3.84e-07
215594_at	---	---	---	2.18035	13.6161	8.56e-12	1.39e-09
229004_at	---	---	---	2.18311	12.0911	7.69e-11	8.25e-09
1554863_s_at	DOK5	docking protein 5	55816	2.18465	10.642	7.6e-10	5.66e-08
213416_at	ITGA4	integrin, alpha 4 (antigen CD49D, alpha 4 subunit of VLA-4 receptor)	3676	2.18616	6.13977	4.6e-06	6.85e-05
212689_s_at	KDM3A	lysine (K)-specific demethylase 3A	55818	2.18974	8.97776	1.41e-08	5.92e-07
227271_at	FGF11	fibroblast growth factor 11	2256	2.20384	10.8346	5.53e-10	4.31e-08
214157_at	GNAS	GNAS complex locus	2778	2.20813	11.6563	1.5e-10	1.45e-08
229157_at	---	---	---	2.21423	8.49103	3.52e-08	1.25e-06
230730_at	SGCD	sarcoglycan, delta (35kDa dystrophin-associated glycoprotein)	6444	2.21582	10.21	1.57e-09	1.01e-07
214022_s_at	IFITM1	interferon induced transmembrane protein 1 (9-27)	8519	2.21634	12.7802	2.78e-11	3.68e-09
202242_at	TSPAN7	tetraspanin 7	7102	2.21669	12.9631	2.14e-11	3.01e-09
202508_s_at	SNAP25	synaptosomal-associated protein, 25kDa	6616	2.21958	10.2191	1.55e-09	1e-07
201231_s_at	ENO1	enolase 1, (alpha)	2023	2.22822	12.4504	4.5e-11	5.49e-09
202497_x_at	SLC2A3	solute carrier family 2 (facilitated glucose transporter), member 3	6515	2.22982	8.75264	2.14e-08	8.27e-07
236480_at	---	---	---	2.23188	10.341	1.26e-09	8.45e-08
204622_x_at	NR4A2	nuclear receptor subfamily 4, group A, member 2	4929	2.23292	9.25768	8.41e-09	3.9e-07
227084_at	DTNA	dystrobrevin, alpha	1837	2.23514	12.69	3.17e-11	4.07e-09
209301_at	CA2	carbonic anhydrase II	760	2.24225	14.6091	2.28e-12	4.72e-10
204014_at	DUSP4	dual specificity phosphatase 4	1846	2.24569	8.18166	6.41e-08	2.06e-06
241703_at	RUNDC3B	RUN domain containing 3B	154661	2.25106	7.62787	1.93e-07	5.08e-06
200697_at	HK1	hexokinase 1	3098	2.25241	14.0637	4.67e-12	8.54e-10
241789_at	---	---	---	2.25278	4.11407	0.000507687	0.00308598
204998_s_at	ATF5	activating transcription factor 5	22809	2.25576	9.58173	4.69e-09	2.5e-07
229271_x_at	COL11A1	collagen, type XI, alpha 1	1301	2.26324	6.54504	1.89e-06	3.29e-05
202733_at	P4HA2	prolyl 4-hydroxylase, alpha polypeptide II	8974	2.26508	14.2041	3.87e-12	7.38e-10
238133_at	---	---	---	2.26516	7.93642	1.04e-07	3.09e-06
202498_s_at	SLC2A3	solute carrier family 2 (facilitated glucose transporter), member 3	6515	2.26544	9.65057	4.15e-09	2.26e-07
231166_at	GPR155	G protein-coupled receptor 155	151556	2.27149	9.31912	7.52e-09	3.59e-07
202856_s_at	SLC16A3	solute carrier family 16, member 3 (monocarboxylic acid transporter 4)	9123	2.27487	8.38293	4.33e-08	1.48e-06
240433_x_at	---	---	---	2.27959	7.64271	1.88e-07	4.95e-06
219894_at	MAGEL2	MAGE-like 2	54551	2.28056	11.8005	1.2e-10	1.2e-08
236085_at	CAPSL	calcyphosine-like	133690	2.28497	10.2319	1.51e-09	9.88e-08
236704_at	---	---	---	2.28904	11.7247	1.34e-10	1.33e-08
1568609_s_at	FAM91A2 /// FLJ39739 /// LOC100286793 /// LOC728855 /// LOC728875	family with sequence similarity 91, member A2 /// hypothetical FLJ39739 /// hypothetical LOC100286793 /// hypothetical LOC728855 /// hypothetical LOC728875	100286793 /// 388685 /// 57234 /// 728855 /// 728875	2.29087	3.39939	0.00274466	0.0120816
215446_s_at	LOX	lysyl oxidase	4015	2.2922	6.23401	3.73e-06	5.79e-05
214111_at	OPCML	opioid binding protein/cell adhesion molecule-like	4978	2.30155	7.54112	2.31e-07	5.89e-06
223672_at	SGIP1	SH3-domain GRB2-like (endophilin) interacting protein 1	84251	2.30425	5.05361	5.51e-05	0.000513962
225381_at	LOC399959	hypothetical LOC399959	399959	2.30838	14.7124	1.99e-12	4.22e-10
201601_x_at	IFITM1	interferon induced transmembrane protein 1 (9-27)	8519	2.31357	6.71936	1.29e-06	2.42e-05
218952_at	PCSK1N	proprotein convertase subtilisin/kexin type 1 inhibitor	27344	2.33012	6.52034	1.99e-06	3.43e-05
235489_at	RHOJ	ras homolog gene family, member J	57381	2.33821	9.875	2.8e-09	1.63e-07
240532_at	SLC32A1	solute carrier family 32 (GABA vesicular transporter), member 1	140679	2.34129	12.0983	7.61e-11	8.23e-09
228100_at	C1orf88	chromosome 1 open reading frame 88	128344	2.3433	11.5021	1.9e-10	1.76e-08
208308_s_at	GPI /// LOC100133951	glucose phosphate isomerase /// similar to Glucose phosphate isomerase	100133951 /// 2821	2.34854	6.58384	1.73e-06	3.08e-05
202499_s_at	SLC2A3	solute carrier family 2 (facilitated glucose transporter), member 3	6515	2.35129	9.61858	4.39e-09	2.38e-07
228051_at	LOC202451	hypothetical protein LOC202451	202451	2.35181	13.0304	1.94e-11	2.8e-09
224558_s_at	MALAT1	metastasis associated lung adenocarcinoma transcript 1 (non-protein coding)	378938	2.36989	17.1279	1.08e-13	4.18e-11
201694_s_at	EGR1	early growth response 1	1958	2.37035	9.67788	3.96e-09	2.17e-07
226682_at	RORA	RAR-related orphan receptor A	6095	2.38384	5.87607	8.31e-06	0.000110754
203438_at	STC2	stanniocalcin 2	8614	2.3891	12.8768	2.42e-11	3.32e-09
205047_s_at	ASNS	asparagine synthetase	440	2.38932	14.0475	4.77e-12	8.62e-10
204595_s_at	STC1	stanniocalcin 1	6781	2.40785	13.5558	9.31e-12	1.49e-09
1554452_a_at	C7orf68	chromosome 7 open reading frame 68	29923	2.40884	6.07901	5.27e-06	7.64e-05
242243_at	TMF1	TATA element modulatory factor 1	7110	2.41177	8.62238	2.74e-08	1.02e-06
1555243_x_at	C8orf59	chromosome 8 open reading frame 59	401466	2.41738	7.84581	1.25e-07	3.56e-06
204584_at	L1CAM	L1 cell adhesion molecule	3897	2.42044	8.17929	6.44e-08	2.07e-06
216248_s_at	NR4A2	nuclear receptor subfamily 4, group A, member 2	4929	2.42843	8.89364	1.64e-08	6.73e-07
243610_at	C9orf135	chromosome 9 open reading frame 135	138255	2.42928	10.5679	8.59e-10	6.26e-08
204646_at	DPYD	dihydropyrimidine dehydrogenase	1806	2.43539	7.9315	1.05e-07	3.11e-06
229170_s_at	TTC18	tetratricopeptide repeat domain 18	118491	2.43877	6.78199	1.13e-06	2.17e-05
207543_s_at	P4HA1	prolyl 4-hydroxylase, alpha polypeptide I	5033	2.46402	9.56529	4.83e-09	2.54e-07
215321_at	RUNDC3B	RUN domain containing 3B	154661	2.46588	7.66411	1.8e-07	4.78e-06
209660_at	TTR	transthyretin	7276	2.47363	5.55104	1.74e-05	0.000201808
229012_at	C9orf24	chromosome 9 open reading frame 24	84688	2.48352	10.1338	1.79e-09	1.13e-07
226348_at	---	---	---	2.48388	14.0688	4.64e-12	8.53e-10
242669_at	UFM1	Ubiquitin-fold modifier 1	51569	2.49154	5.48874	2.01e-05	0.000227679
238663_x_at	GRIA4	glutamate receptor, ionotrophic, AMPA 4	2893	2.51752	7.91511	1.08e-07	3.19e-06
207267_s_at	DSCR6	Down syndrome critical region gene 6	53820	2.51828	15.0679	1.27e-12	2.95e-10
209566_at	INSIG2	insulin induced gene 2	51141	2.52911	6.83203	1.02e-06	1.99e-05
210232_at	CDC42	cell division cycle 42 (GTP binding protein, 25kDa)	998	2.53625	9.83003	3.03e-09	1.74e-07
206172_at	IL13RA2	interleukin 13 receptor, alpha 2	3598	2.53809	11.7399	1.31e-10	1.31e-08
238116_at	DYNLRB2	dynein, light chain, roadblock-type 2	83657	2.5494	11.9998	8.83e-11	9.26e-09
238466_at	---	---	---	2.56753	11.5255	1.83e-10	1.71e-08
213790_at	ADAM12	ADAM metallopeptidase domain 12	8038	2.58465	9.43856	6.06e-09	3.02e-07
207957_s_at	PRKCB	protein kinase C, beta	5579	2.58619	12.9705	2.12e-11	2.99e-09
209446_s_at	C7orf44	chromosome 7 open reading frame 44	55744	2.60426	14.7443	1.91e-12	4.08e-10
214230_at	CDC42	cell division cycle 42 (GTP binding protein, 25kDa)	998	2.60702	10.6237	7.83e-10	5.81e-08
220551_at	SLC17A6	solute carrier family 17 (sodium-dependent inorganic phosphate cotransporter), member 6	57084	2.60743	10.3693	1.2e-09	8.2e-08
238996_x_at	ALDOA	aldolase A, fructose-bisphosphate	226	2.61671	10.353	1.23e-09	8.37e-08
1566964_at	---	---	---	2.62039	12.2864	5.74e-11	6.69e-09
1555241_at	C8orf59	chromosome 8 open reading frame 59	401466	2.64589	7.61561	1.98e-07	5.18e-06
225342_at	AK3L1	adenylate kinase 3-like 1	205	2.64641	10.9183	4.83e-10	3.87e-08
244295_at	---	---	---	2.64862	8.00673	9.04e-08	2.75e-06
235066_at	MAP4	microtubule-associated protein 4	4134	2.66637	14.9285	1.51e-12	3.39e-10
229818_at	SVOP	SV2 related protein homolog (rat)	55530	2.67401	9.50248	5.4e-09	2.78e-07
213921_at	SST	somatostatin	6750	2.68117	14.5279	2.53e-12	5.09e-10
226777_at	---	---	---	2.69832	11.488	1.94e-10	1.78e-08
235118_at	---	---	---	2.71112	7.78545	1.41e-07	3.91e-06
218706_s_at	GRAMD3	GRAM domain containing 3	65983	2.7207	9.87999	2.77e-09	1.62e-07
205691_at	SYNGR3	synaptogyrin 3	9143	2.75614	14.24	3.69e-12	7.12e-10
225664_at	COL12A1	collagen, type XII, alpha 1	1303	2.77672	9.45303	5.91e-09	2.95e-07
206552_s_at	TAC1	tachykinin, precursor 1	6863	2.79387	21.7853	9.57e-16	9.9e-13
227404_s_at	EGR1	Early growth response 1	1958	2.79972	7.79181	1.39e-07	3.88e-06
200650_s_at	LDHA	lactate dehydrogenase A	3939	2.80375	23.0622	3.08e-16	4.68e-13
209686_at	S100B	S100 calcium binding protein B	6285	2.80493	15.2197	1.05e-12	2.55e-10
238623_at	---	---	---	2.80938	11.901	1.03e-10	1.05e-08
203929_s_at	MAPT	microtubule-associated protein tau	4137	2.85073	9.06979	1.19e-08	5.17e-07
205626_s_at	CALB1	calbindin 1, 28kDa	793	2.85323	8.6481	2.61e-08	9.73e-07
223529_at	SYT4	synaptotagmin IV	6860	2.85621	13.7949	6.71e-12	1.15e-09
200966_x_at	ALDOA	aldolase A, fructose-bisphosphate	226	2.86027	11.1383	3.38e-10	2.84e-08
213543_at	SGCD	sarcoglycan, delta (35kDa dystrophin-associated glycoprotein)	6444	2.86173	13.775	6.89e-12	1.17e-09
228483_s_at	TAF9B	TAF9B RNA polymerase II, TATA box binding protein (TBP)-associated factor, 31kDa	51616	2.9012	10.5318	9.13e-10	6.57e-08
214687_x_at	ALDOA	aldolase A, fructose-bisphosphate	226	2.90222	13.675	7.9e-12	1.3e-09
204035_at	SCG2	secretogranin II (chromogranin C)	7857	2.90838	13.3159	1.3e-11	1.99e-09
205278_at	GAD1	glutamate decarboxylase 1 (brain, 67kDa)	2571	2.90872	9.8709	2.82e-09	1.64e-07
231077_at	C1orf192	chromosome 1 open reading frame 192	257177	2.95483	15.509	7.3e-13	1.88e-10
207307_at	HTR2C	5-hydroxytryptamine (serotonin) receptor 2C	3358	2.973	9.31255	7.61e-09	3.62e-07
202464_s_at	PFKFB3	6-phosphofructo-2-kinase/fructose-2,6-biphosphatase 3	5209	2.97656	18.0758	3.78e-14	1.72e-11
231202_at	ALDH1L2	Aldehyde dehydrogenase 1 family, member L2	160428	2.9889	13.2127	1.5e-11	2.24e-09
200738_s_at	PGK1	phosphoglycerate kinase 1	5230	3.01579	25.5863	3.85e-17	7.75e-14
216598_s_at	CCL2	chemokine (C-C motif) ligand 2	6347	3.0186	16.0671	3.71e-13	1.18e-10
230695_s_at	RSPH9	radial spoke head 9 homolog (Chlamydomonas)	221421	3.03069	20.1136	4.65e-15	3.19e-12
36711_at	MAFF	v-maf musculoaponeurotic fibrosarcoma oncogene homolog F (avian)	23764	3.03733	10.193	1.62e-09	1.04e-07
238720_at	OMG	Oligodendrocyte myelin glycoprotein	4974	3.06022	11.5387	1.8e-10	1.68e-08
1568606_at	C11orf88	chromosome 11 open reading frame 88	399949	3.18372	17.664	5.93e-14	2.54e-11
236915_at	C4orf47	chromosome 4 open reading frame 47	441054	3.206	12.7381	2.95e-11	3.87e-09
227068_at	PGK1	phosphoglycerate kinase 1	5230	3.21663	15.5553	6.89e-13	1.82e-10
205625_s_at	CALB1	calbindin 1, 28kDa	793	3.22953	12.7324	2.98e-11	3.87e-09
241998_at	C2orf80	chromosome 2 open reading frame 80	389073	3.243	11.839	1.13e-10	1.14e-08
204439_at	IFI44L	interferon-induced protein 44-like	10964	3.29753	16.794	1.58e-13	5.78e-11
232481_s_at	SLITRK6	SLIT and NTRK-like family, member 6	84189	3.29887	15.8995	4.53e-13	1.36e-10
227140_at	---	---	---	3.31538	7.95059	1.01e-07	3.02e-06
205825_at	PCSK1	proprotein convertase subtilisin/kexin type 1	5122	3.3198	9.22861	8.86e-09	4.07e-07
202912_at	ADM	adrenomedullin	133	3.33511	16.7242	1.71e-13	6.19e-11
206339_at	CARTPT	CART prepropeptide	9607	3.36459	13.3461	1.24e-11	1.93e-09
205475_at	SCRG1	scrapie responsive protein 1	11341	3.50319	14.8221	1.73e-12	3.74e-10
204597_x_at	STC1	stanniocalcin 1	6781	3.51313	12.6526	3.35e-11	4.28e-09
240161_s_at	CDC20B	Cell division cycle 20 homolog B (S. cerevisiae)	166979	3.51599	14.6103	2.27e-12	4.72e-10
203282_at	GBE1	glucan (1,4-alpha-), branching enzyme 1	2632	3.537	17.5485	6.73e-14	2.82e-11
232176_at	SLITRK6	SLIT and NTRK-like family, member 6	84189	3.58351	15.783	5.22e-13	1.51e-10
202718_at	IGFBP2	insulin-like growth factor binding protein 2, 36kDa	3485	3.59907	10.927	4.76e-10	3.82e-08
201012_at	ANXA1	annexin A1	301	3.62214	14.4135	2.94e-12	5.8e-10
201037_at	PFKP	phosphofructokinase, platelet	5214	3.81496	11.4434	2.08e-10	1.87e-08
242517_at	KISS1R	KISS1 receptor	84634	3.82944	13.917	5.69e-12	1e-09
210512_s_at	VEGFA	vascular endothelial growth factor A	7422	3.86585	22.0693	7.4e-16	8.42e-13
224345_x_at	FAM162A	family with sequence similarity 162, member A	26355	3.93558	17.1334	1.07e-13	4.18e-11
202270_at	GBP1	guanylate binding protein 1, interferon-inducible, 67kDa	2633	3.98773	18.3724	2.75e-14	1.43e-11
201645_at	TNC	tenascin C	3371	4.05097	28.5701	4.18e-18	1.95e-14
220942_x_at	FAM162A	family with sequence similarity 162, member A	26355	4.09163	25.602	3.81e-17	7.75e-14
201170_s_at	BHLHE40	basic helix-loop-helix family, member e40	8553	4.09598	22.2009	6.58e-16	7.99e-13
201313_at	ENO2	enolase 2 (gamma, neuronal)	2026	4.11712	13.0545	1.88e-11	2.73e-09
237281_at	AKAP14	A kinase (PRKA) anchor protein 14	158798	4.26593	12.9193	2.28e-11	3.16e-09
202934_at	HK2	hexokinase 2	3099	4.28734	20.0025	5.19e-15	3.48e-12
229927_at	LEMD1	LEM domain containing 1	93273	4.40136	19.1385	1.24e-14	7.24e-12
223193_x_at	FAM162A	family with sequence similarity 162, member A	26355	4.4664	21.7787	9.63e-16	9.9e-13
217356_s_at	PGK1	phosphoglycerate kinase 1	5230	4.49772	12.6405	3.41e-11	4.31e-09
201849_at	BNIP3	BCL2/adenovirus E1B 19kDa interacting protein 3	664	4.50407	20.5692	2.99e-15	2.29e-12
200737_at	PGK1	phosphoglycerate kinase 1	5230	4.60112	33.2754	1.9e-19	2.04e-15
240065_at	FAM81B	family with sequence similarity 81, member B	153643	4.73587	14.103	4.43e-12	8.2e-10
237282_s_at	AKAP14	A kinase (PRKA) anchor protein 14	158798	4.7391	22.0424	7.58e-16	8.42e-13
218625_at	NRN1	neuritin 1	51299	4.97811	27.3629	9.98e-18	2.92e-14
202887_s_at	DDIT4	DNA-damage-inducible transcript 4	54541	5.79891	17.2097	9.83e-14	3.96e-11
201848_s_at	BNIP3	BCL2/adenovirus E1B 19kDa interacting protein 3	664	5.81599	18.2414	3.17e-14	1.57e-11
235976_at	SLITRK6	SLIT and NTRK-like family, member 6	84189	6.531	12.8818	2.4e-11	3.31e-09
227337_at	ANKRD37	ankyrin repeat domain 37	353322	6.77214	28.7522	3.67e-18	1.95e-14
242138_at	DLX1	distal-less homeobox 1	1745	6.79321	17.1362	1.07e-13	4.18e-11
206898_at	CDH19	cadherin 19, type 2	28513	7.12911	16.9002	1.4e-13	5.23e-11
235850_at	WDR5B	WD repeat domain 5B	54554	7.15418	18.4514	2.53e-14	1.34e-11
207147_at	DLX2	distal-less homeobox 2	1746	7.29498	21.7556	9.84e-16	9.9e-13
226452_at	PDK1	pyruvate dehydrogenase kinase, isozyme 1	5163	7.35327	16.0392	3.83e-13	1.18e-10

## Sheet: Table S3G_Fstatistics
Affymetrix probe ID	Gene Symbol	Gene Title	Entrez Gene ID	14 Day old Ebs	0.01μM	0.1μM	1μM	10μM	70μM	Average Expression	F Value	P.Value	adj.P.Val
226452_at	PDK1	pyruvate dehydrogenase kinase, isozyme 1	5163	-3.47266	1.05407	1.32639	-1.26405	-2.18711	7.35327	8.24729	100.606	1.5e-14	4.94e-13
207147_at	DLX2	distal-less homeobox 2	1746	1.5733	1.01182	1.01064	1.22173	1.32436	7.29498	5.82246	129.824	1.17e-15	5.54e-14
235850_at	WDR5B	WD repeat domain 5B	54554	1.60823	1.10502	1.30669	1.11038	-1.12709	7.15418	6.54212	93.6769	3.06e-14	9.11e-13
206898_at	CDH19	cadherin 19, type 2	28513	1.78008	1.28662	1.08933	1.13885	-1.1716	7.12911	5.64462	82.3873	1.1e-13	2.7e-12
242138_at	DLX1	distal-less homeobox 1	1745	1.70826	1.26743	1.1498	1.43998	1.33227	6.79321	7.06887	78.5472	1.76e-13	4.13e-12
227337_at	ANKRD37	ankyrin repeat domain 37	353322	-1.43447	-1.14575	1.2941	1.3601	1.24685	6.77214	7.18591	193.422	2.07e-17	1.74e-15
235976_at	SLITRK6	SLIT and NTRK-like family, member 6	84189	2.73528	1.17738	1.63635	1.8419	1.221	6.531	5.50316	60.4282	2.31e-12	3.86e-11
201848_s_at	BNIP3	BCL2/adenovirus E1B 19kDa interacting protein 3	664	-1.36943	-1.03741	-1.06797	-1.39134	-1.24802	5.81599	8.73334	98.9562	1.77e-14	5.7e-13
202887_s_at	DDIT4	DNA-damage-inducible transcript 4	54541	1.39776	-1.13995	-1.30503	-1.42209	-1.38799	5.79891	8.62196	98.0292	1.95e-14	6.17e-13
218625_at	NRN1	neuritin 1	51299	10.4212	1.29687	-1.06589	1.09643	1.22536	4.97811	8.75569	690.573	4.55e-23	3.19e-20
237282_s_at	AKAP14	A kinase (PRKA) anchor protein 14	158798	1.10145	1.03804	1.11613	1.67577	2.11898	4.7391	4.20218	125.574	1.63e-15	7.31e-14
240065_at	FAM81B	family with sequence similarity 81, member B	153643	1.2464	1.20965	1.24588	2.14016	1.71179	4.73587	5.24712	49.7698	1.52e-11	1.97e-10
200737_at	PGK1	phosphoglycerate kinase 1	5230	-1.93555	1.08503	1.07677	-1.1038	-1.09276	4.60112	9.2717	303.265	2.12e-19	3.61e-17
201849_at	BNIP3	BCL2/adenovirus E1B 19kDa interacting protein 3	664	-1.33172	1.05954	1.04895	-1.24042	-1.60018	4.50407	9.95255	129.416	1.2e-15	5.67e-14
217356_s_at	PGK1	phosphoglycerate kinase 1	5230	-1.42583	1.03144	-1.14594	-1.34306	-1.17865	4.49772	9.95664	47.8721	2.21e-11	2.74e-10
223193_x_at	FAM162A	family with sequence similarity 162, member A	26355	-1.78564	1.05261	1.09195	-1.18784	-1.06705	4.4664	10.5562	138.864	5.92e-16	3.11e-14
229927_at	LEMD1	LEM domain containing 1	93273	1.22744	1.08844	1.12847	1.30498	1.4504	4.40136	7.17126	91.6416	3.81e-14	1.09e-12
202934_at	HK2	hexokinase 2	3099	-1.5267	-1.1986	-1.27467	-1.59019	-2.07204	4.28734	7.7068	169.492	7.9e-17	5.51e-15
237281_at	AKAP14	A kinase (PRKA) anchor protein 14	158798	1.26745	1.39885	1.42866	3.03373	2.63107	4.26593	5.48619	52.2256	9.54e-12	1.31e-10
201313_at	ENO2	enolase 2 (gamma, neuronal)	2026	2.01151	-1.17517	-1.65768	-1.50593	-1.18154	4.11712	8.30813	71.607	4.38e-13	9.08e-12
201170_s_at	BHLHE40	basic helix-loop-helix family, member e40	8553	-2.47099	-1.10055	-1.06286	-1.11689	1.04362	4.09598	6.29497	167.755	8.77e-17	6.02e-15
220942_x_at	FAM162A	family with sequence similarity 162, member A	26355	-1.63611	-1.02893	1.15464	-1.13444	-1.05347	4.09163	10.5984	179.036	4.54e-17	3.41e-15
201645_at	TNC	tenascin C	3371	-1.81815	1.14142	1.09996	1.62364	2.2931	4.05097	8.27355	183.64	3.51e-17	2.77e-15
202270_at	GBP1	guanylate binding protein 1, interferon-inducible, 67kDa	2633	1.14058	1.0962	1.16357	1.25265	1.75201	3.98773	4.88756	80.5464	1.37e-13	3.3e-12
224345_x_at	FAM162A	family with sequence similarity 162, member A	26355	-1.71687	-1.00687	1.07033	-1.2164	-1.06428	3.93558	10.6112	89.7569	4.69e-14	1.3e-12
210512_s_at	VEGFA	vascular endothelial growth factor A	7422	1.44748	-1.27583	-1.08887	-1.71067	-2.28234	3.86585	8.55384	224.185	4.62e-18	4.71e-16
242517_at	KISS1R	KISS1 receptor	84634	-1.42963	-1.11618	-1.19107	-1.20644	-1.10707	3.82944	5.57689	57.5449	3.72e-12	5.81e-11
201037_at	PFKP	phosphofructokinase, platelet	5214	-2.92211	-1.28535	1.06003	-1.46638	-1.26042	3.81496	8.68735	68.7933	6.5e-13	1.28e-11
201012_at	ANXA1	annexin A1	301	-35.572	-1.2237	-1.07739	-1.3167	1.19907	3.62214	7.35747	446.674	4.01e-21	1.34e-18
202718_at	IGFBP2	insulin-like growth factor binding protein 2, 36kDa	3485	-1.27015	1.00984	-1.42376	-1.48584	-1.36927	3.59907	9.75277	44.8465	4.13e-11	4.69e-10
232176_at	SLITRK6	SLIT and NTRK-like family, member 6	84189	1.60659	1.24377	1.33068	1.33393	1.11224	3.58351	6.54005	73.2776	3.49e-13	7.45e-12
203282_at	GBE1	glucan (1,4-alpha-), branching enzyme 1	2632	-2.41674	1.18359	1.05303	-1.01254	-1.14566	3.537	8.76618	95.4705	2.54e-14	7.73e-13
240161_s_at	CDC20B	Cell division cycle 20 homolog B (S. cerevisiae)	166979	3.99526	1.57838	1.51563	3.79415	3.27677	3.51599	6.91661	214.5	7.24e-18	6.81e-16
204597_x_at	STC1	stanniocalcin 1	6781	-2.44624	-1.20739	1.28309	-1.03764	-1.06719	3.51313	6.63914	58.2785	3.29e-12	5.24e-11
205475_at	SCRG1	scrapie responsive protein 1	11341	1.62788	1.26349	1.4087	1.02393	-1.00752	3.50319	7.42748	69.4463	5.92e-13	1.18e-11
206339_at	CARTPT	CART prepropeptide	9607	5.09384	1.21079	1.08638	1.4893	2.44298	3.36459	9.71143	170.591	7.4e-17	5.22e-15
202912_at	ADM	adrenomedullin	133	-26.3764	-1.14093	-1.10068	-1.31084	-1.32303	3.33511	6.8865	610.308	1.62e-22	9.68e-20
205825_at	PCSK1	proprotein convertase subtilisin/kexin type 1	5122	1.80202	1.33602	1.00699	1.53463	1.27681	3.3198	5.65704	31.6504	1.1e-09	8.36e-09
227140_at	---	---	---	-2.73186	1.35417	1.28846	2.32756	2.36059	3.31538	5.16453	15.8228	5.11e-07	1.93e-06
232481_s_at	SLITRK6	SLIT and NTRK-like family, member 6	84189	5.23663	1.09865	1.25675	1.31867	1.02816	3.29887	7.68854	218.826	5.91e-18	5.78e-16
204439_at	IFI44L	interferon-induced protein 44-like	10964	1.63519	1.094	1.29122	1.68681	1.53197	3.29753	5.40851	92.141	3.61e-14	1.04e-12
241998_at	C2orf80	chromosome 2 open reading frame 80	389073	1.67681	1.50426	1.31638	2.03504	2.42449	3.243	5.84553	56.5989	4.38e-12	6.68e-11
205625_s_at	CALB1	calbindin 1, 28kDa	793	-5.26142	1.26762	1.37094	1.73541	1.84767	3.22953	7.19179	68.3451	6.93e-13	1.35e-11
227068_at	PGK1	phosphoglycerate kinase 1	5230	-3.37566	1.10438	1.12149	-1.02949	-1.197	3.21663	9.27123	108.984	6.76e-15	2.55e-13
236915_at	C4orf47	chromosome 4 open reading frame 47	441054	-1.10211	1.0743	1.24045	1.42582	1.31352	3.206	6.59233	32.1623	9.5e-10	7.37e-09
1568606_at	C11orf88	chromosome 11 open reading frame 88	399949	1.21699	-1.01932	1.03696	1.49372	1.66227	3.18372	6.18615	93.939	2.98e-14	8.91e-13
238720_at	OMG	Oligodendrocyte myelin glycoprotein	4974	1.20143	-1.10288	1.12351	1.81587	1.99269	3.06022	5.00876	44.0146	4.94e-11	5.48e-10
36711_at	MAFF	v-maf musculoaponeurotic fibrosarcoma oncogene homolog F (avian)	23764	-4.35791	1.06413	-1.2258	-1.6994	-1.4073	3.03733	5.77313	87.4291	6.09e-14	1.63e-12
230695_s_at	RSPH9	radial spoke head 9 homolog (Chlamydomonas)	221421	1.76469	1.14366	1.03715	1.20413	1.16026	3.03069	7.43821	139.442	5.68e-16	3.02e-14
216598_s_at	CCL2	chemokine (C-C motif) ligand 2	6347	-1.13973	-1.0767	1.07536	1.05486	1.56462	3.0186	6.67538	69.9726	5.5e-13	1.11e-11
200738_s_at	PGK1	phosphoglycerate kinase 1	5230	-1.782	-1.00196	-1.01738	-1.23843	-1.22192	3.01579	11.551	227.638	3.95e-18	4.15e-16
231202_at	ALDH1L2	Aldehyde dehydrogenase 1 family, member L2	160428	-1.1819	1.11167	1.02101	1.23613	1.01892	2.9889	4.57488	38.0649	1.96e-10	1.83e-09
202464_s_at	PFKFB3	6-phosphofructo-2-kinase/fructose-2,6-biphosphatase 3	5209	1.28843	-1.02606	-1.22646	-1.1942	-1.19902	2.97656	8.4243	106.145	8.8e-15	3.2e-13
207307_at	HTR2C	5-hydroxytryptamine (serotonin) receptor 2C	3358	1.95447	1.57646	1.43894	4.61486	3.69965	2.973	7.30683	76.9571	2.15e-13	4.92e-12
231077_at	C1orf192	chromosome 1 open reading frame 192	257177	2.10787	1.22104	1.21408	2.26195	2.34336	2.95483	7.16409	139.254	5.76e-16	3.05e-14
205278_at	GAD1	glutamate decarboxylase 1 (brain, 67kDa)	2571	1.8252	1.03328	-1.06471	-1.08342	1.06856	2.90872	6.99075	37.1004	2.5e-10	2.26e-09
204035_at	SCG2	secretogranin II (chromogranin C)	7857	1.40633	1.16316	1.38715	1.65867	1.92277	2.90838	6.84838	56.619	4.36e-12	6.66e-11
214687_x_at	ALDOA	aldolase A, fructose-bisphosphate	226	-1.60976	-1.19467	-1.37421	-1.50424	-1.28987	2.90222	10.9228	84.2877	8.75e-14	2.24e-12
228483_s_at	TAF9B	TAF9B RNA polymerase II, TATA box binding protein (TBP)-associated factor, 31kDa	51616	1.24643	1.05828	1.13401	1.26577	-1.1733	2.9012	6.40023	31.0104	1.33e-09	9.87e-09
213543_at	SGCD	sarcoglycan, delta (35kDa dystrophin-associated glycoprotein)	6444	1.54648	1.07878	1.33544	1.57082	1.45264	2.86173	6.91995	62.2712	1.73e-12	3e-11
200966_x_at	ALDOA	aldolase A, fructose-bisphosphate	226	-1.51278	-1.26997	-1.43439	-1.61058	-1.34454	2.86027	10.974	60.2403	2.38e-12	3.96e-11
223529_at	SYT4	synaptotagmin IV	6860	16.3329	1.34156	1.20162	1.5747	1.64411	2.85621	11.3105	474.858	2.14e-21	8.01e-19
205626_s_at	CALB1	calbindin 1, 28kDa	793	-4.57976	1.23124	1.25085	1.66005	1.6881	2.85323	6.91954	34.1892	5.37e-10	4.43e-09
203929_s_at	MAPT	microtubule-associated protein tau	4137	1.87786	1.01146	-1.19323	1.02746	1.27571	2.85073	8.42051	33.129	7.21e-10	5.75e-09
238623_at	---	---	---	1.23198	1.38642	1.26181	1.18857	1.12985	2.80938	8.28794	35.4795	3.8e-10	3.27e-09
209686_at	S100B	S100 calcium binding protein B	6285	1.68869	1.01506	-1.03124	1.04994	1.25298	2.80493	6.36794	81.4411	1.23e-13	3e-12
200650_s_at	LDHA	lactate dehydrogenase A	3939	-1.49033	-1.10819	-1.03953	-1.34623	-1.26605	2.80375	12.0747	189.133	2.6e-17	2.13e-15
227404_s_at	EGR1	Early growth response 1	1958	1.38885	-1.27636	-1.20699	-1.07272	1.37961	2.79972	5.2808	23.6102	1.59e-08	8.84e-08
206552_s_at	TAC1	tachykinin, precursor 1	6863	5.37071	1.56558	1.20152	1.81077	2.18803	2.79387	10.7902	628.234	1.21e-22	7.43e-20
225664_at	COL12A1	collagen, type XII, alpha 1	1303	-15.3696	1.833	1.4149	2.51827	2.8526	2.77672	6.72362	116.047	3.6e-15	1.46e-13
205691_at	SYNGR3	synaptogyrin 3	9143	-1.59533	1.03874	-1.07159	1.04555	1.10811	2.75614	6.80202	52.6516	8.82e-12	1.22e-10
218706_s_at	GRAMD3	GRAM domain containing 3	65983	-2.5314	1.50861	1.69835	2.94982	2.55651	2.7207	6.92407	26.4533	5.71e-09	3.56e-08
235118_at	---	---	---	3.88715	1.34821	-1.01181	1.56292	1.36239	2.71112	5.86338	57.8702	3.53e-12	5.55e-11
226777_at	---	---	---	3.17563	-1.14809	-1.1553	-1.40798	-1.48703	2.69832	6.23308	93.532	3.11e-14	9.22e-13
213921_at	SST	somatostatin	6750	5.37006	-1.01303	-1.16322	-1.27804	-1.16049	2.68117	9.05129	228.451	3.81e-18	4.02e-16
229818_at	SVOP	SV2 related protein homolog (rat)	55530	1.67883	1.13865	-1.02996	1.29032	1.38472	2.67401	6.64845	33.0038	7.47e-10	5.94e-09
235066_at	MAP4	microtubule-associated protein 4	4134	10.6734	1.32317	1.02648	1.43439	1.53344	2.66637	8.46649	466.302	2.58e-21	9.33e-19
244295_at	---	---	---	1.82856	1.53174	1.30008	1.33534	1.29572	2.64862	5.33727	28.3524	3.04e-09	2.05e-08
225342_at	AK3L1	adenylate kinase 3-like 1	205	-7.05367	-1.12641	1.03914	-1.51024	-1.84391	2.64641	8.37715	184.83	3.28e-17	2.63e-15
1555241_at	C8orf59	chromosome 8 open reading frame 59	401466	-1.92915	-1.00931	1.26505	1.07964	1.21856	2.64589	6.253	22.2248	2.73e-08	1.42e-07
1566964_at	---	---	---	1.01277	1.02648	1.06973	1.02713	1.14706	2.62039	5.42736	35.9284	3.38e-10	2.95e-09
238996_x_at	ALDOA	aldolase A, fructose-bisphosphate	226	-1.84988	-1.22536	-1.6533	-1.75824	-1.49306	2.61671	8.02842	71.911	4.2e-13	8.77e-12
220551_at	SLC17A6	solute carrier family 17 (sodium-dependent inorganic phosphate cotransporter), member 6	57084	34.4658	1.47506	1.31632	1.85252	1.59976	2.60743	9.47831	484.059	1.76e-21	6.9e-19
214230_at	CDC42	cell division cycle 42 (GTP binding protein, 25kDa)	998	10.2176	1.46169	1.36754	1.78301	1.96422	2.60702	8.22941	259.684	1.03e-18	1.35e-16
209446_s_at	C7orf44	chromosome 7 open reading frame 44	55744	1.14155	1.18014	-1.12565	-1.12109	-1.25147	2.60426	6.30001	67.6544	7.66e-13	1.48e-11
207957_s_at	PRKCB	protein kinase C, beta	5579	-1.06479	1.30052	1.04438	1.16918	1.35623	2.58619	5.91622	34.401	5.07e-10	4.21e-09
213790_at	ADAM12	ADAM metallopeptidase domain 12	8038	2.11977	-1.06207	1.12024	-1.07243	-1.41322	2.58465	5.79151	45.9968	3.24e-11	3.82e-10
217294_s_at	ENO1	enolase 1, (alpha)	2023	-1.11107	-1.50182	-1.96718	-2.61581	-1.5471	2.57206	10.3875	5.81837	0.000790307	0.00142879
238466_at	---	---	---	1.4958	1.27109	1.24633	1.39947	1.31866	2.56753	5.10143	41.943	7.82e-11	8.17e-10
238116_at	DYNLRB2	dynein, light chain, roadblock-type 2	83657	2.32168	1.32701	1.38669	2.09995	1.71585	2.5494	6.74027	96.3812	2.31e-14	7.12e-13
206172_at	IL13RA2	interleukin 13 receptor, alpha 2	3598	1.15474	1.14469	1.25971	1.65252	2.30835	2.53809	5.5065	47.2668	2.5e-11	3.05e-10
210232_at	CDC42	cell division cycle 42 (GTP binding protein, 25kDa)	998	2.16352	1.27696	1.09475	1.38715	1.73896	2.53625	7.84719	53.4942	7.56e-12	1.07e-10
209566_at	INSIG2	insulin induced gene 2	51141	1.22635	1.47143	1.42994	1.52514	1.10365	2.52911	8.36662	13.3975	2.01e-06	6.57e-06
207267_s_at	DSCR6	Down syndrome critical region gene 6	53820	2.37905	1.34801	1.32643	1.6427	1.16831	2.51828	8.05474	140.024	5.45e-16	2.92e-14
238663_x_at	GRIA4	glutamate receptor, ionotrophic, AMPA 4	2893	1.57404	1.33823	1.22706	1.67833	1.66087	2.51752	5.25109	24.2702	1.24e-08	7.09e-08
242669_at	UFM1	Ubiquitin-fold modifier 1	51569	-2.49581	1.84623	1.77359	1.86803	1.0531	2.49154	7.0938	8.49073	6.45e-05	0.000148702
226348_at	---	---	---	1.91114	-1.00837	-1.13241	-1.15581	-1.19402	2.48388	8.0345	89.8539	4.64e-14	1.29e-12
229012_at	C9orf24	chromosome 9 open reading frame 24	84688	1.54161	1.26188	1.13108	2.0804	1.83584	2.48352	7.66818	46.6599	2.82e-11	3.4e-10
209660_at	TTR	transthyretin	7276	27.9313	-1.2056	-1.06858	1.30815	1.95161	2.47363	11.7722	130.181	1.13e-15	5.43e-14
215321_at	RUNDC3B	RUN domain containing 3B	154661	4.13534	1.54033	1.17251	1.82732	1.64953	2.46588	6.6348	75.7733	2.51e-13	5.66e-12
207543_s_at	P4HA1	prolyl 4-hydroxylase, alpha polypeptide I	5033	-1.46116	1.08976	1.28216	-1.04123	-1.17974	2.46402	9.16395	24.8818	9.94e-09	5.82e-08
229170_s_at	TTC18	tetratricopeptide repeat domain 18	118491	1.86658	1.13741	1.25708	1.58666	1.14311	2.43877	5.35975	21.2295	4.09e-08	2.04e-07
204646_at	DPYD	dihydropyrimidine dehydrogenase	1806	2.35377	1.48879	1.47808	1.70681	1.43734	2.43539	5.84124	43.3351	5.73e-11	6.25e-10
243610_at	C9orf135	chromosome 9 open reading frame 135	138255	-41.0882	1.15649	1.72695	1.9036	1.78099	2.42928	7.42574	405.658	1.08e-20	2.96e-18
216248_s_at	NR4A2	nuclear receptor subfamily 4, group A, member 2	4929	1.87086	1.0781	-1.16424	1.20102	1.07447	2.42843	5.53869	35.99	3.32e-10	2.91e-09
204584_at	L1CAM	L1 cell adhesion molecule	3897	3.5601	-1.21678	-1.63974	-1.28745	-1.12904	2.42044	8.01496	60.3145	2.36e-12	3.92e-11
1555243_x_at	C8orf59	chromosome 8 open reading frame 59	401466	-1.80349	1.0851	1.10931	1.09915	1.17385	2.41738	6.17423	19.3711	9.11e-08	4.16e-07
242243_at	TMF1	TATA element modulatory factor 1	7110	-1.09389	1.22172	1.09964	1.30755	1.02519	2.41177	4.87556	15.5415	5.94e-07	2.2e-06
1554452_a_at	C7orf68	chromosome 7 open reading frame 68	29923	-1.08887	1.07468	-1.02777	-1.13884	1.07343	2.40884	8.63942	11.0058	9.45e-06	2.64e-05				2	4
204595_s_at	STC1	stanniocalcin 1	6781	-1.62479	-1.06647	-1.06692	-1.20203	-1.15431	2.40785	7.5844	68.0863	7.19e-13	1.4e-11
205047_s_at	ASNS	asparagine synthetase	440	-2.95352	1.24142	-1.06089	1.05978	-1.07349	2.38932	10.235	101.568	1.37e-14	4.56e-13
203438_at	STC2	stanniocalcin 2	8614	-2.25108	-1.16359	-1.11249	-1.18548	-1.06755	2.3891	6.62465	88.2202	5.56e-14	1.5e-12
226682_at	RORA	RAR-related orphan receptor A	6095	-1.45972	1.41881	1.19541	1.18681	-1.24681	2.38384	7.22897	10.5337	1.32e-05	3.57e-05
201694_s_at	EGR1	early growth response 1	1958	1.31791	1.00917	-1.09743	1.11893	1.21475	2.37035	7.94034	28.6387	2.77e-09	1.89e-08
224558_s_at	MALAT1	metastasis associated lung adenocarcinoma transcript 1 (non-protein coding)	378938	2.38012	1.0828	-1.18749	-1.11068	-1.12969	2.36989	9.33525	173.75	6.15e-17	4.44e-15
228051_at	LOC202451	hypothetical protein LOC202451	202451	-1.74651	1.08648	1.02742	1.27376	1.29154	2.35181	6.38797	39.4653	1.39e-10	1.35e-09
202499_s_at	SLC2A3	solute carrier family 2 (facilitated glucose transporter), member 3	6515	-8.1621	-1.47033	-1.43918	-2.34847	-2.86648	2.35129	8.53733	273.375	6.11e-19	8.78e-17
208308_s_at	GPI /// LOC100133951	glucose phosphate isomerase /// similar to Glucose phosphate isomerase	100133951 /// 2821	1.01279	-1.17497	-1.73203	-1.6285	-1.3713	2.34854	8.58609	23.0754	1.95e-08	1.06e-07
228100_at	C1orf88	chromosome 1 open reading frame 88	128344	-1.37996	1.02539	-1.05558	1.4057	1.50604	2.3433	8.22749	36.1342	3.2e-10	2.82e-09
240532_at	SLC32A1	solute carrier family 32 (GABA vesicular transporter), member 1	140679	1.54478	-1.14421	-1.00648	1.06302	1.1798	2.34129	5.21753	54.0393	6.86e-12	9.85e-11
235489_at	RHOJ	ras homolog gene family, member J	57381	1.79022	1.55656	1.31299	1.45571	1.37108	2.33821	5.95491	46.2283	3.09e-11	3.66e-10
218952_at	PCSK1N	proprotein convertase subtilisin/kexin type 1 inhibitor	27344	1.55357	1.0292	-1.17073	1.12126	1.60809	2.33012	7.6317	20.23	6.24e-08	2.97e-07
201601_x_at	IFITM1	interferon induced transmembrane protein 1 (9-27)	8519	-4.82069	-1.17584	-1.07262	-1.34699	1.2594	2.31357	9.62854	56.5445	4.42e-12	6.73e-11
225381_at	LOC399959	hypothetical LOC399959	399959	14.4921	1.22876	1.02198	1.36195	1.4162	2.30838	8.53976	712.581	3.3e-23	2.53e-20
223672_at	SGIP1	SH3-domain GRB2-like (endophilin) interacting protein 1	84251	1.84275	1.32199	1.18783	1.65651	1.33506	2.30425	5.91907	13.1609	2.32e-06	7.47e-06
214111_at	OPCML	opioid binding protein/cell adhesion molecule-like	4978	5.37102	1.40647	1.11312	1.53774	1.30373	2.30155	7.83813	95.8719	2.43e-14	7.45e-13
215446_s_at	LOX	lysyl oxidase	4015	-2.33675	-1.05092	1.20324	-1.03566	1.20475	2.2922	4.94402	16.0134	4.62e-07	1.76e-06
1568609_s_at	FAM91A2 /// FLJ39739 /// LOC100286793 /// LOC728855 /// LOC728875	family with sequence similarity 91, member A2 /// hypothetical FLJ39739 /// hypothetical LOC100286793 /// hypothetical LOC728855 /// hypothetical LOC728875	100286793 /// 388685 /// 57234 /// 728855 /// 728875	-2.88783	-1.1088	-1.30148	-1.44444	-1.01399	2.29087	7.18507	11.3032	7.7e-06	2.2e-05
236704_at	---	---	---	1.23381	1.13794	1.26346	1.38347	1.36219	2.28904	8.03631	36.173	3.17e-10	2.8e-09
236085_at	CAPSL	calcyphosine-like	133690	1.23708	1.055	-1.02975	1.82106	1.83937	2.28497	5.80298	43.5999	5.41e-11	5.94e-10
219894_at	MAGEL2	MAGE-like 2	54551	1.79126	-1.06621	1.07648	1.0659	1.12965	2.28056	7.25168	59.8572	2.54e-12	4.17e-11
240433_x_at	---	---	---	2.28247	1.26168	1.36151	1.61988	1.58891	2.27959	6.07138	42.6007	6.74e-11	7.19e-10
202856_s_at	SLC16A3	solute carrier family 16, member 3 (monocarboxylic acid transporter 4)	9123	3.4741	-1.24863	-1.03897	-2.59572	-2.2178	2.27487	5.51328	93.5106	3.12e-14	9.23e-13
231166_at	GPR155	G protein-coupled receptor 155	151556	1.43573	1.26848	1.09456	1.04656	1.16291	2.27149	4.71867	27.8791	3.54e-09	2.35e-08
202498_s_at	SLC2A3	solute carrier family 2 (facilitated glucose transporter), member 3	6515	-14.2418	-1.20791	-1.07229	-1.47771	-1.51888	2.26544	7.62312	302.041	2.21e-19	3.72e-17
238133_at	---	---	---	3.04318	1.14126	-1.0957	1.23682	1.45299	2.26516	7.4495	56.5896	4.38e-12	6.69e-11
202733_at	P4HA2	prolyl 4-hydroxylase, alpha polypeptide II	8974	-1.03752	-1.05877	-1.03066	-1.51149	-1.36807	2.26508	7.22428	81.7128	1.19e-13	2.91e-12
229271_x_at	COL11A1	collagen, type XI, alpha 1	1301	-2.19534	1.39056	1.59554	1.61306	1.27073	2.26324	5.84281	10.545	1.31e-05	3.54e-05
204998_s_at	ATF5	activating transcription factor 5	22809	-1.15262	-1.0229	-1.02734	-1.00886	1.05731	2.25576	7.08367	23.2908	1.8e-08	9.86e-08
241789_at	---	---	---	2.80349	-1.0724	-1.00974	-1.10941	1.09633	2.25278	6.48762	13.3822	2.03e-06	6.62e-06
200697_at	HK1	hexokinase 1	3098	-1.763	-1.18884	-1.34095	-1.23471	-1.17496	2.25241	9.40929	101.377	1.39e-14	4.64e-13
241703_at	RUNDC3B	RUN domain containing 3B	154661	5.93842	1.65412	1.14082	1.88482	1.7539	2.25106	7.31442	125.44	1.65e-15	7.37e-14
204014_at	DUSP4	dual specificity phosphatase 4	1846	3.72679	1.11218	-1.40274	1.02329	-1.063	2.24569	7.84311	70.9964	4.77e-13	9.75e-12
209301_at	CA2	carbonic anhydrase II	760	1.04204	1.31695	-1.0139	1.52702	1.60584	2.24225	9.01664	58.0846	3.4e-12	5.38e-11
227084_at	DTNA	dystrobrevin, alpha	1837	-3.45666	1.26912	1.18449	1.4481	1.35127	2.23514	8.02565	82.9332	1.03e-13	2.55e-12
204622_x_at	NR4A2	nuclear receptor subfamily 4, group A, member 2	4929	1.88407	1.0835	-1.10584	1.13429	1.17433	2.23292	6.25419	41.2736	9.11e-11	9.35e-10
236480_at	---	---	---	1.10165	-1.09253	-1.04009	-1.11524	-1.03894	2.23188	5.22042	31.1652	1.27e-09	9.48e-09
202497_x_at	SLC2A3	solute carrier family 2 (facilitated glucose transporter), member 3	6515	-10.0582	-1.0353	1.10948	-1.21976	-1.32279	2.22982	8.2949	178.38	4.71e-17	3.5e-15
201231_s_at	ENO1	enolase 1, (alpha)	2023	-1.22012	-1.11399	-1.28504	-1.53499	-1.46297	2.22822	11.8261	77.9804	1.89e-13	4.39e-12
202508_s_at	SNAP25	synaptosomal-associated protein, 25kDa	6616	17.769	1.33424	-1.17441	1.0746	1.10062	2.21958	8.59754	420.145	7.51e-21	2.33e-18
202242_at	TSPAN7	tetraspanin 7	7102	2.61122	1.19672	-1.05283	1.18866	1.31389	2.21669	7.79221	127.501	1.4e-15	6.47e-14
214022_s_at	IFITM1	interferon induced transmembrane protein 1 (9-27)	8519	-5.43528	-1.06043	-1.03257	-1.16889	1.10181	2.21634	10.167	218.315	6.05e-18	5.9e-16
230730_at	SGCD	sarcoglycan, delta (35kDa dystrophin-associated glycoprotein)	6444	1.1905	1.07011	1.26756	1.50061	1.65308	2.21582	5.93685	31.2319	1.25e-09	9.31e-09
229157_at	---	---	---	1.03113	-1.07505	-1.09999	-1.1531	-1.10463	2.21423	4.60507	21.8067	3.23e-08	1.65e-07
214157_at	GNAS	GNAS complex locus	2778	1.97762	1.03428	-1.13085	1.10869	1.28404	2.20813	7.30412	72.067	4.11e-13	8.59e-12
227271_at	FGF11	fibroblast growth factor 11	2256	-1.16741	-1.17764	-1.09393	-1.09082	-1.02202	2.20384	6.76907	38.4997	1.76e-10	1.67e-09
212689_s_at	KDM3A	lysine (K)-specific demethylase 3A	55818	1.2687	1.22114	1.01167	-1.02756	-1.45006	2.18974	9.45755	32.3917	8.89e-10	6.95e-09
213416_at	ITGA4	integrin, alpha 4 (antigen CD49D, alpha 4 subunit of VLA-4 receptor)	3676	1.31667	1.41617	1.28749	1.10272	-1.52543	2.18616	6.27816	18.9242	1.11e-07	4.99e-07
1554863_s_at	DOK5	docking protein 5	55816	1.34839	1.01805	-1.01395	-1.00353	1.11475	2.18465	7.5382	35.6441	3.64e-10	3.15e-09
229004_at	---	---	---	2.31837	-1.11967	-1.1417	-1.28358	-1.27684	2.18311	7.74199	94.4086	2.83e-14	8.52e-13
215594_at	---	---	---	-3.81768	-1.04695	1.07454	1.07839	-1.06408	2.18035	6.54472	164.854	1.05e-16	7.05e-15
206023_at	NMU	neuromedin U	10874	-3.98044	1.17907	1.24449	1.48056	1.54313	2.17969	8.79978	60.6215	2.24e-12	3.75e-11
232113_at	---	---	---	18.4008	1.29711	1.09911	1.47633	1.27904	2.1774	9.29899	450.782	3.65e-21	1.25e-18
238662_at	ATPBD4	ATP binding domain 4	89978	-2.77154	1.06567	-1.0908	-1.09869	1.06453	2.1657	7.73716	80.1852	1.43e-13	3.43e-12
204730_at	RIMS3	regulating synaptic membrane exocytosis 3	9783	2.7638	1.02972	-1.52713	-1.26009	-1.14588	2.16314	8.20753	119.176	2.76e-15	1.17e-13
1562102_at	AKR1C1	Aldo-keto reductase family 1, member C1 (dihydrodiol dehydrogenase 1; 20-alpha (3-alpha)-hydroxysteroid dehydrogenase)	1645	1.56275	1.48879	1.15616	1.66863	1.63355	2.16233	4.71667	17.4762	2.21e-07	9.14e-07
214844_s_at	DOK5	docking protein 5	55816	1.54634	1.11573	1.00035	1.03638	1.15225	2.1587	9.00041	62.2168	1.74e-12	3.02e-11
220269_at	ZBBX	zinc finger, B-box domain containing	79740	-1.03067	1.10485	1.09547	1.46685	1.19969	2.15721	5.81491	18.5897	1.3e-07	5.72e-07
228239_at	FAM165B	family with sequence similarity 165, member B	54065	1.71301	1.24222	1.61405	1.62349	1.72569	2.15419	6.39748	104.399	1.04e-14	3.66e-13
213011_s_at	TPI1	triosephosphate isomerase 1	7167	-1.41412	-1.07281	-1.10982	-1.33615	-1.12619	2.15414	11.5357	32.2253	9.33e-10	7.25e-09
1553976_a_at	RP11-529I10.4	deleted in a mouse model of primary ciliary dyskinesia	25911	-1.04613	1.08652	-1.02111	1.11497	1.28277	2.15315	8.74327	20.4969	5.57e-08	2.68e-07
219714_s_at	CACNA2D3	calcium channel, voltage-dependent, alpha 2/delta subunit 3	55799	1.36302	1.33158	1.10071	1.56843	1.71987	2.14207	6.52634	24.4395	1.17e-08	6.7e-08
238906_s_at	RHOJ	ras homolog gene family, member J	57381	1.04403	-1.0262	1.06421	1.04172	1.33792	2.12458	4.27289	34.2758	5.25e-10	4.34e-09
204763_s_at	GNAO1	guanine nucleotide binding protein (G protein), alpha activating activity polypeptide O	2775	2.0769	-1.07938	-1.13841	-1.05767	1.13987	2.11692	6.97054	58.1365	3.37e-12	5.35e-11
212171_x_at	VEGFA	vascular endothelial growth factor A	7422	1.03557	-1.21601	1.07168	1.00728	1.14068	2.11423	7.66745	27.3393	4.23e-09	2.74e-08
207076_s_at	ASS1	argininosuccinate synthetase 1	445	-3.5457	-1.04713	1.06149	-1.20935	-1.04905	2.11264	8.1993	134.611	8.1e-16	4.08e-14
238047_at	RP13-102H20.1	hypothetical protein FLJ30058	158763	4.67731	1.40217	1.12582	1.53232	2.12573	2.11144	7.03317	130.533	1.1e-15	5.31e-14
204567_s_at	ABCG1	ATP-binding cassette, sub-family G (WHITE), member 1	9619	1.30502	1.0651	1.0647	1.04729	1.33215	2.11084	4.24197	39.1222	1.51e-10	1.45e-09
213849_s_at	PPP2R2B	protein phosphatase 2 (formerly 2A), regulatory subunit B, beta isoform	5521	-3.42664	1.34418	1.12435	1.29125	1.30186	2.10544	7.73823	43.2945	5.78e-11	6.29e-10
216929_x_at	ABO	ABO blood group (transferase A, alpha 1-3-N-acetylgalactosaminyltransferase; transferase B, alpha 1-3-galactosyltransferase)	28	-1.15836	-1.12988	2.25625	2.04977	2.44902	2.10475	5.36407	30.8688	1.39e-09	1.02e-08
201251_at	PKM2	pyruvate kinase, muscle	5315	-1.53684	-1.00411	-1.04286	-1.08019	-1.05784	2.09594	7.74105	24.8218	1.02e-08	5.93e-08
230495_at	LOC150568	hypothetical LOC150568	150568	1.59945	1.14329	1.03096	1.11114	1.36786	2.09297	5.1951	27.4464	4.09e-09	2.65e-08
221950_at	EMX2	empty spiracles homeobox 2	2018	1.50506	1.3412	-1.01081	1.04646	-1.04559	2.08999	5.25033	50.1734	1.41e-11	1.84e-10
228109_at	RASGRF2	Ras protein-specific guanine nucleotide-releasing factor 2	5924	-3.90098	1.07718	-1.15065	1.14094	1.10478	2.08739	7.32458	106.645	8.4e-15	3.07e-13
209700_x_at	PDE4DIP	phosphodiesterase 4D interacting protein	9659	1.26647	1.21654	1.34283	1.31175	1.17042	2.08574	4.16306	17.7754	1.91e-07	8.03e-07
200822_x_at	TPI1	triosephosphate isomerase 1	7167	-1.41921	-1.08858	-1.1361	-1.33995	-1.05147	2.08541	11.2932	30.9781	1.34e-09	9.95e-09
1553655_at	CDC20B	cell division cycle 20 homolog B (S. cerevisiae)	166979	1.0402	1.09197	1.24097	1.4173	1.43101	2.08195	6.17389	19.3267	9.29e-08	4.23e-07
217168_s_at	HERPUD1	homocysteine-inducible, endoplasmic reticulum stress-inducible, ubiquitin-like domain member 1	9709	1.36843	1.17381	1.10317	1.08785	1.03907	2.07902	9.39169	86.1578	7.04e-14	1.84e-12
239556_at	LOC645513	Hypothetical LOC645513	645513	1.69052	-1.00241	1.18842	1.10829	-1.04246	2.07863	4.45333	32.0335	9.86e-10	7.58e-09
202952_s_at	ADAM12	ADAM metallopeptidase domain 12	8038	1.7914	-1.11468	1.14499	-1.01083	-1.02892	2.07571	6.49054	52.5664	8.96e-12	1.24e-10
230143_at	RNF165	ring finger protein 165	494470	3.04928	1.0876	-1.04285	1.05115	1.03996	2.07466	7.97512	183.328	3.57e-17	2.79e-15
229057_at	SCN2A	sodium channel, voltage-gated, type II, alpha subunit	6326	2.30817	2.01076	1.34787	2.15133	2.15189	2.07183	5.79287	42.9028	6.3e-11	6.79e-10
225481_at	FRMD6	FERM domain containing 6	122786	-2.29361	1.3952	1.46501	1.44384	1.18824	2.07039	8.75234	8.41263	6.89e-05	0.000157952
205630_at	CRH	corticotropin releasing hormone	1392	1.10696	-1.14822	-1.00415	1.05497	-1.01276	2.07009	4.79473	56.8153	4.22e-12	6.48e-11
210033_s_at	SPAG6	sperm associated antigen 6	9576	1.68152	1.18532	1.23905	1.87342	1.45376	2.06781	6.57791	17.0767	2.69e-07	1.09e-06
238919_at	---	---	---	8.69608	1.23496	1.06542	1.29212	1.18828	2.06621	6.98683	199.49	1.51e-17	1.31e-15
209159_s_at	NDRG4	NDRG family member 4	65009	2.61652	-1.16887	-1.67433	-1.37707	1.01498	2.06492	8.36708	49.1085	1.73e-11	2.21e-10
214956_at	AAK1	AP2 associated kinase 1	22848	1.71491	1.20569	1.25159	1.66674	1.61166	2.06379	6.40075	34.0401	5.6e-10	4.6e-09
228749_at	ZDBF2	zinc finger, DBF-type containing 2	57683	-1.14843	1.18645	1.35226	1.47225	1.23431	2.05719	8.14887	13.4517	1.94e-06	6.37e-06
218720_x_at	LOC652900 /// SEZ6L2	similar to seizure related 6 homolog (mouse)-like 2 isoform 1 /// seizure related 6 homolog (mouse)-like 2	26470 /// 652900	1.20788	-1.25962	-1.13443	-1.19998	1.06193	2.05706	6.12343	19.5646	8.35e-08	3.85e-07
215855_s_at	TMF1	TATA element modulatory factor 1	7110	-1.06434	1.1764	1.29541	1.28201	1.29544	2.05552	5.79327	14.6197	9.85e-07	3.46e-06
211959_at	IGFBP5	insulin-like growth factor binding protein 5	3488	4.33268	-1.08683	1.07255	-1.1086	-1.24729	2.05347	9.22324	317.451	1.33e-19	2.36e-17
228115_at	---	---	---	1.49663	1.24517	1.02489	1.09371	1.17836	2.05179	6.3137	21.3844	3.84e-08	1.93e-07
204547_at	RAB40B	RAB40B, member RAS oncogene family	10966	1.62095	1.08102	-1.22169	-1.22686	-1.20545	2.05001	7.12634	50.3121	1.37e-11	1.79e-10
236685_at	---	---	---	-1.27268	1.15569	-1.00003	1.03788	-1.01806	2.042	6.88559	19.4464	8.81e-08	4.04e-07
227202_at	CNTN1	Contactin 1	1272	1.07342	1.69763	1.26754	1.51667	1.52666	2.04165	5.33348	7.30079	0.000183421	0.000380451
230497_at	BRUNOL5	bruno-like 5, RNA binding protein (Drosophila)	60680	5.51734	1.01077	-1.39109	-1.04718	1.04435	2.0384	8.33965	106.129	8.81e-15	3.2e-13
205651_x_at	RAPGEF4	Rap guanine nucleotide exchange factor (GEF) 4	11069	-1.03937	1.32148	1.17958	1.25761	1.18145	2.03791	4.17411	14.1269	1.3e-06	4.47e-06
238697_at	NCRNA00086	Non-protein coding RNA 86	399668	-1.39989	-1.00071	1.0191	1.04851	1.02701	2.03548	5.24824	18.0929	1.64e-07	7.03e-07
237134_at	---	---	---	2.73915	1.36106	1.21806	1.59308	1.3998	2.03475	7.02375	38.2617	1.87e-10	1.76e-09
232289_at	KCNJ12	potassium inwardly-rectifying channel, subfamily J, member 12	3768	1.11177	-1.0349	1.14846	1.12617	1.22976	2.03297	6.55915	28.0008	3.4e-09	2.27e-08
235916_at	YPEL4	yippee-like 4 (Drosophila)	219539	1.31579	-1.12866	-1.05597	-1.09849	1.11832	2.0329	4.80524	17.9911	1.72e-07	7.33e-07
243339_at	---	---	---	4.2249	1.31368	-1.08652	1.23623	1.25829	2.02595	7.00038	45.8569	3.34e-11	3.9e-10
238018_at	FAM150B	family with sequence similarity 150, member B	285016	-8.53187	-1.00086	1.31885	1.30314	1.35375	2.0218	5.32776	101.11	1.43e-14	4.74e-13
235264_at	HCFC2	host cell factor C2	29915	3.65747	1.48355	1.47595	1.56795	1.30155	2.0192	6.62149	37.2064	2.43e-10	2.21e-09
209990_s_at	GABBR2	gamma-aminobutyric acid (GABA) B receptor, 2	9568	1.47104	1.26677	-1.12631	1.03929	1.11342	2.01751	6.36735	19.4905	8.63e-08	3.97e-07
239767_at	---	---	---	1.5814	1.30869	1.2339	1.47328	1.33678	2.01426	4.88393	17.1083	2.65e-07	1.08e-06
219463_at	C20orf103	chromosome 20 open reading frame 103	24141	3.80294	-1.03629	-1.59754	-1.50178	-1.07144	2.01353	8.62867	161.65	1.28e-16	8.41e-15
218899_s_at	BAALC	brain and acute leukemia, cytoplasmic	79870	4.69641	1.23948	1.00891	1.13048	1.09159	2.01182	7.5582	84.7407	8.3e-14	2.13e-12
243481_at	RHOJ	ras homolog gene family, member J	57381	1.41293	1.00295	1.0511	1.29347	1.14813	2.01094	5.2697	27.0439	4.67e-09	2.99e-08
239218_at	PDE1C	phosphodiesterase 1C, calmodulin-dependent 70kDa	5137	-1.08706	1.31552	1.23323	1.38864	1.26102	2.00955	4.56535	9.2546	3.47e-05	8.5e-05
224602_at	C4orf3	chromosome 4 open reading frame 3	401152	-1.33054	-1.05079	-1.07934	-1.15858	1.04254	2.00884	10.2581	13.1223	2.37e-06	7.63e-06
1568612_at	GABRG2	gamma-aminobutyric acid (GABA) A receptor, gamma 2	2566	1.69276	1.24286	1.18862	1.45786	1.68509	2.00791	5.95732	12.6131	3.25e-06	1.01e-05
229331_at	SPATA18	spermatogenesis associated 18 homolog (rat)	132671	-2.34674	1.31695	1.30433	1.99343	1.262	2.00499	6.80044	8.25378	7.88e-05	0.000178469
238454_at	ZNF540	zinc finger protein 540	163255	1.50409	1.39399	1.28582	1.75935	1.46471	1.99829	6.02822	13.6768	1.7e-06	5.65e-06
201631_s_at	IER3	immediate early response 3	8870	-4.9486	-1.17846	-1.02806	-1.19927	1.02806	1.99758	8.22191	169.913	7.71e-17	5.41e-15
1557636_a_at	C7orf57	chromosome 7 open reading frame 57	136288	-4.60447	1.16143	1.1434	1.65422	1.1371	1.99089	4.06937	37.455	2.28e-10	2.09e-09
209117_at	WBP2	WW domain binding protein 2	23558	1.14991	-1.1253	1.18153	1.31797	1.41992	1.98837	7.26202	22.9273	2.07e-08	1.11e-07
228499_at	PFKFB4	6-phosphofructo-2-kinase/fructose-2,6-biphosphatase 4	5210	1.36126	-1.1825	-1.25263	-1.28109	-1.26104	1.98812	8.29161	72.0695	4.11e-13	8.59e-12
223503_at	TMEM163	transmembrane protein 163	81615	10.7725	1.03866	-1.53772	-1.08861	-1.04469	1.98804	7.8916	258.682	1.07e-18	1.39e-16
201110_s_at	THBS1	thrombospondin 1	7057	-2.01834	1.39179	1.36852	1.849	1.76048	1.98599	7.23179	12.2415	4.13e-06	1.26e-05
229125_at	KANK4	KN motif and ankyrin repeat domains 4	163782	2.84112	1.1144	1.04808	-1.52059	-1.71594	1.98567	7.32625	82.5519	1.08e-13	2.66e-12
227321_at	GATS	GATS, stromal antigen 3 opposite strand	352954	1.13793	1.00836	-1.10934	-1.07156	1.09336	1.98516	5.61962	16.3564	3.87e-07	1.5e-06
236420_s_at	ANO4	anoctamin 4	121601	-3.52691	1.21444	1.17918	1.51244	1.27644	1.9847	5.64075	34.2623	5.27e-10	4.35e-09
237131_at	C1orf230	chromosome 1 open reading frame 230	284485	1.31957	1.24106	1.24222	1.44425	1.55516	1.98314	6.48123	37.1667	2.46e-10	2.23e-09
230425_at	EPHB1	EPH receptor B1	2047	3.40123	-1.06038	-1.59822	-1.07314	-1.04119	1.98302	8.03075	55.1241	5.65e-12	8.3e-11
212642_s_at	HIVEP2	human immunodeficiency virus type I enhancer binding protein 2	3097	1.3616	1.11441	-1.03907	1.03582	1.04848	1.98217	6.15819	44.1256	4.82e-11	5.38e-10
1555867_at	GNG4	guanine nucleotide binding protein (G protein), gamma 4	2786	3.1458	1.03127	-1.5476	-1.2928	-1.13412	1.97986	7.92145	161.166	1.32e-16	8.56e-15
238966_at	BRUNOL4	bruno-like 4, RNA binding protein (Drosophila)	56853	4.34894	1.09273	-1.36874	1.09816	1.1143	1.97873	7.42992	193.328	2.08e-17	1.75e-15
229795_at	---	---	---	2.39165	1.2873	1.27412	1.44081	1.2786	1.97659	6.61381	48.0569	2.13e-11	2.65e-10
230093_at	RSPH1	radial spoke head 1 homolog (Chlamydomonas)	89765	1.62193	1.2473	1.31468	1.89285	1.68258	1.97126	6.35441	46.5394	2.9e-11	3.47e-10
226347_at	---	---	---	1.78328	-1.14381	-1.29267	-1.34343	-1.40621	1.9695	8.63152	31.1081	1.29e-09	9.62e-09
232231_at	RUNX2	runt-related transcription factor 2	860	1.01044	1.23477	1.28199	2.0719	1.80711	1.96782	5.96881	9.11008	3.89e-05	9.43e-05
206045_s_at	NOL4	nucleolar protein 4	8715	1.62966	1.10181	1.06385	1.45118	1.58438	1.96701	6.59555	29.7715	1.94e-09	1.37e-08
234954_at	---	---	---	-1.16089	-1.07227	-1.00853	1.00836	1.38725	1.96632	9.01514	7.27911	0.000187128	0.000387268
219603_s_at	ZNF226	zinc finger protein 226	7769	1.33721	1.33264	1.47702	1.42602	1.36666	1.96578	7.17802	14.4474	1.09e-06	3.78e-06
201556_s_at	VAMP2	vesicle-associated membrane protein 2 (synaptobrevin 2)	6844	1.15057	-1.02859	-1.02049	-1.00052	1.03981	1.95979	5.02394	21.644	3.45e-08	1.75e-07
206686_at	PDK1	pyruvate dehydrogenase kinase, isozyme 1	5163	-1.40984	-1.14054	-1.02296	-1.09208	1.10232	1.95712	6.43355	23.4049	1.72e-08	9.49e-08
204995_at	CDK5R1	cyclin-dependent kinase 5, regulatory subunit 1 (p35)	8851	10.5059	1.17198	-1.56696	-1.04907	1.0478	1.95579	8.14351	283.449	4.22e-19	6.38e-17
207996_s_at	C18orf1	chromosome 18 open reading frame 1	753	1.15417	1.15085	1.10003	1.64588	1.554	1.95534	4.94245	23.1092	1.93e-08	1.05e-07
219945_at	DDX25	DEAD (Asp-Glu-Ala-Asp) box polypeptide 25	29118	-1.64592	-1.06379	-1.05459	1.06194	1.1321	1.95403	6.54571	41.8214	8.04e-11	8.37e-10
206290_s_at	RGS7	regulator of G-protein signaling 7	6000	1.20492	1.28773	1.19744	1.43975	1.47492	1.95215	6.3664	13.2925	2.14e-06	6.95e-06
225191_at	CIRBP	cold inducible RNA binding protein	1153	1.34692	-1.24888	-1.00823	-1.17958	-1.25829	1.95205	6.99129	27.4677	4.06e-09	2.64e-08
226086_at	SYT13	synaptotagmin XIII	57586	2.19649	1.16054	-1.12066	1.05453	1.14659	1.94986	8.63656	53.1206	8.1e-12	1.14e-10
218623_at	HMP19	HMP19 protein	51617	20.0522	1.0951	-1.48574	-1.04042	1.13025	1.94902	9.43805	384.313	1.87e-20	4.61e-18
236500_at	---	---	---	1.16356	1.13204	1.17062	1.27601	1.31568	1.94741	6.19873	20.302	6.05e-08	2.89e-07
226034_at	---	---	---	2.65777	1.05676	-1.21991	-1.06913	1.02975	1.94731	7.8647	93.6121	3.08e-14	9.15e-13
236024_at	GPM6A	glycoprotein M6A	2823	3.63191	1.11584	1.01771	1.24983	1.52104	1.94685	9.2459	156.004	1.83e-16	1.15e-14
233337_s_at	LOC652900 /// SEZ6L2	similar to seizure related 6 homolog (mouse)-like 2 isoform 1 /// seizure related 6 homolog (mouse)-like 2	26470 /// 652900	1.18689	-1.17008	1.06528	-1.11848	1.06982	1.93851	6.91559	9.11805	3.86e-05	9.37e-05
219270_at	CHAC1	ChaC, cation transport regulator homolog 1 (E. coli)	79094	-1.31604	-1.24593	-1.06817	-1.0415	1.07223	1.93777	7.37986	22.1785	2.78e-08	1.45e-07
212221_x_at	IDS	iduronate 2-sulfatase	3423	1.18651	1.1304	-1.38263	-1.0918	-1.07498	1.93694	9.76985	26.118	6.41e-09	3.94e-08
215143_at	DPY19L2P2	dpy-19-like 2 pseudogene 2 (C. elegans)	349152	3.63486	1.24744	1.13439	1.32341	1.16018	1.93516	7.06104	45.4433	3.64e-11	4.22e-10
230839_at	PRMT8	protein arginine methyltransferase 8	56341	1.18758	1.07717	1.12252	1.10198	1.20824	1.93397	7.25195	11.0879	8.93e-06	2.51e-05
232416_at	BRUNOL5	bruno-like 5, RNA binding protein (Drosophila)	60680	1.93553	-1.07564	-1.1366	1.00224	1.01712	1.93312	6.87373	27.308	4.28e-09	2.76e-08
226009_at	RP11-529I10.4	deleted in a mouse model of primary ciliary dyskinesia	25911	1.00394	1.08549	-1.07557	1.0031	1.0506	1.92885	8.79997	23.4413	1.7e-08	9.36e-08
238593_at	C11orf80	chromosome 11 open reading frame 80	79703	1.12363	1.0182	-1.02947	1.0363	-1.19207	1.9277	6.3212	18.9582	1.1e-07	4.92e-07
205143_at	NCAN	neurocan	1463	6.46829	1.04894	-1.21711	1.09456	1.18306	1.92682	7.85634	198.592	1.58e-17	1.37e-15
230913_at	---	---	---	-1.06478	1.02263	1.04435	1.16182	1.32561	1.92319	5.00984	16.1998	4.2e-07	1.62e-06
219628_at	ZMAT3	zinc finger, matrin type 3	64393	-2.59214	1.09113	1.01153	1.09102	1.17524	1.9227	7.23723	40.6206	1.06e-10	1.06e-09
213353_at	ABCA5	ATP-binding cassette, sub-family A (ABC1), member 5	23461	-1.13429	1.37601	1.37772	1.55989	1.19494	1.92183	5.66768	4.73471	0.00263397	0.00426039
213075_at	OLFML2A	olfactomedin-like 2A	169611	1.35431	1.00841	-1.03768	1.07578	1.01637	1.9215	7.78858	39.2255	1.48e-10	1.42e-09
226939_at	CPEB2	cytoplasmic polyadenylation element binding protein 2	132864	-1.34011	1.16226	-1.03527	1.31618	1.15809	1.91999	8.01327	6.18074	0.00054296	0.00101565
230538_at	SHC4	SHC (Src homology 2 domain containing) family, member 4	399694	1.68392	1.33039	1.49542	1.63556	1.67878	1.91768	5.18567	20.0948	6.62e-08	3.13e-07
229546_at	LOC653602	hypothetical LOC653602	653602	1.28585	1.15484	-1.04371	-1.01326	1.06592	1.91714	4.31391	15.787	5.21e-07	1.96e-06
230962_at	DCLK1	doublecortin-like kinase 1	9201	5.52533	1.2349	-1.1614	1.30461	1.1476	1.91605	6.95278	68.4484	6.83e-13	1.33e-11
244660_at	ELAVL1	ELAV (embryonic lethal, abnormal vision, Drosophila)-like 1 (Hu antigen R)	1994	3.21137	1.1649	-1.16031	1.10888	-1.17644	1.91403	7.10233	45.0231	3.98e-11	4.54e-10
237542_at	---	---	---	-1.13744	1.01054	1.30781	1.12469	1.49964	1.91367	5.73312	12.989	2.57e-06	8.21e-06
203001_s_at	STMN2	stathmin-like 2	11075	7.60154	1.14197	-1.06823	1.15595	1.43475	1.91351	12.7894	245.796	1.81e-18	2.14e-16
232583_at	---	---	---	1.09098	1.22912	1.34284	1.39259	1.32336	1.91198	6.82038	17.3064	2.4e-07	9.85e-07
244071_at	FBLL1	fibrillarin-like 1	345630	1.83426	-1.02538	-1.16849	1.02677	1.22437	1.91185	7.93652	73.4273	3.42e-13	7.32e-12
235146_at	TMCC3	transmembrane and coiled-coil domain family 3	57458	1.30796	1.26071	1.21591	1.3098	1.30617	1.91027	5.57158	17.6075	2.07e-07	8.63e-07
207725_at	POU4F2	POU class 4 homeobox 2	5458	12.1702	1.12043	-1.52429	1.01662	-1.09732	1.90943	8.16782	128.174	1.33e-15	6.2e-14
223654_s_at	BRUNOL4	bruno-like 4, RNA binding protein (Drosophila)	56853	2.65429	-1.02211	-1.49285	-1.0228	1.03641	1.90828	7.77189	41.4365	8.78e-11	9.03e-10
204653_at	TFAP2A	transcription factor AP-2 alpha (activating enhancer binding protein 2 alpha)	7020	12.5963	-1.11829	-1.59579	-1.25103	-1.31217	1.90656	9.68985	240.628	2.25e-18	2.58e-16
201162_at	IGFBP7	insulin-like growth factor binding protein 7	3490	-3.46652	1.09498	1.21271	1.73169	1.77584	1.90579	9.28244	55.3565	5.43e-12	8.03e-11
238417_at	PGM2L1	phosphoglucomutase 2-like 1	283209	-1.16972	1.25479	1.06157	1.27314	1.19755	1.90379	7.78772	14.8306	8.75e-07	3.12e-06
224368_s_at	NDRG3	NDRG family member 3	57446	1.18605	1.04169	1.00524	1.04029	1.08712	1.90367	5.89229	23.8577	1.45e-08	8.14e-08
205737_at	KCNQ2	potassium voltage-gated channel, KQT-like subfamily, member 2	3785	2.13204	-1.14633	-1.34732	-1.09685	1.04938	1.9026	7.13104	30.4125	1.59e-09	1.16e-08
231131_at	FAM133A	family with sequence similarity 133, member A	286499	-1.36323	1.51432	1.53993	1.71359	1.5126	1.89929	6.68465	6.94627	0.000255636	0.000513311
210222_s_at	RTN1	reticulon 1	6252	37.774	1.15818	-1.23156	1.05423	1.39121	1.89579	9.92738	1011.48	8.94e-25	1.52e-21
212706_at	LOC100133005 /// RASA4	RAS p21 protein activator 4 pseudogene /// RAS p21 protein activator 4	100133005 /// 10156	3.50548	1.03275	-1.27893	-1.13011	-1.24517	1.89388	6.2859	77.6405	1.97e-13	4.54e-12
1553207_at	ARL10	ADP-ribosylation factor-like 10	285598	-1.33024	-1.02372	1.55866	1.67635	1.52889	1.8937	5.91186	34.5951	4.81e-10	4.02e-09
230746_s_at	---	---	---	-1.95463	-1.06299	1.12756	1.02862	-1.11036	1.89355	4.33424	49.0943	1.73e-11	2.21e-10
232911_at	ZFP14	zinc finger protein 14 homolog (mouse)	57677	1.15156	1.28977	1.19806	1.33981	1.25856	1.89297	5.10087	12.6697	3.14e-06	9.83e-06
236088_at	NTNG1	netrin G1	22854	2.50462	1.2403	-1.02028	1.39703	1.40533	1.89203	7.11135	69.6589	5.75e-13	1.15e-11
209842_at	SOX10	SRY (sex determining region Y)-box 10	6663	1.66187	-1.099	1.01556	-1.15096	-1.20719	1.89134	6.96857	58.8249	3.01e-12	4.84e-11
204720_s_at	DNAJC6	DnaJ (Hsp40) homolog, subfamily C, member 6	9829	1.37638	1.37298	1.09037	1.22171	1.15725	1.89008	8.36398	13.2267	2.23e-06	7.2e-06
206228_at	PAX2	paired box 2	5076	1.60514	-1.15145	-1.30657	-1.36903	-1.1313	1.88807	6.76664	51.0356	1.19e-11	1.59e-10
217886_at	EPS15	epidermal growth factor receptor pathway substrate 15	2060	-1.40454	1.35456	1.20694	1.38106	1.2202	1.8875	8.99728	6.33702	0.000463589	0.000880844
223854_at	PCDHB10	protocadherin beta 10	56126	3.00739	1.14585	-1.20643	-1.04289	-1.11168	1.88694	6.21797	48.7261	1.86e-11	2.36e-10
221697_at	MAP1LC3C	microtubule-associated protein 1 light chain 3 gamma	440738	-1.12498	1.03398	1.14975	1.14515	1.45927	1.88671	5.81549	21.6067	3.5e-08	1.77e-07
238744_at	---	---	---	1.46826	1.4422	1.18128	1.53263	1.10289	1.8863	5.85313	12.824	2.85e-06	8.99e-06
232547_at	SNIP	SNAP25-interacting protein	80725	1.71883	1.1657	1.00519	1.12062	1.15339	1.88522	6.65443	40.0619	1.21e-10	1.19e-09
219738_s_at	PCDH9	protocadherin 9	5101	5.36598	1.36775	-1.10419	1.19185	1.18526	1.88489	8.15736	88.5422	5.37e-14	1.45e-12
233022_at	TRPM3	transient receptor potential cation channel, subfamily M, member 3	80036	1.57594	1.26351	1.23073	1.75568	1.55655	1.88445	7.4937	98.0748	1.94e-14	6.15e-13
220168_at	CASC1	cancer susceptibility candidate 1	55259	1.26846	1.18777	1.12646	1.45384	1.28553	1.88173	4.52421	15.7257	5.38e-07	2.02e-06
202454_s_at	ERBB3	v-erb-b2 erythroblastic leukemia viral oncogene homolog 3 (avian)	2065	1.07336	-1.01689	1.01859	-1.57497	-1.36579	1.88121	7.08804	38.0776	1.95e-10	1.83e-09
237384_x_at	---	---	---	2.39344	1.23082	1.12673	1.1143	1.0554	1.87775	5.27746	39.5949	1.35e-10	1.31e-09
226627_at	40429	septin 8	23176	1.68147	-1.06823	-1.03807	1.1341	1.20922	1.87546	6.62214	36.8115	2.69e-10	2.42e-09
205728_at	---	---	---	1.19002	1.18021	1.15687	1.36703	1.29216	1.87433	5.16184	6.9556	0.000253379	0.000509256
211276_at	TCEAL2	transcription elongation factor A (SII)-like 2	140597	1.20275	1.21247	-1.13196	1.07179	1.25424	1.87366	7.93668	38.4005	1.81e-10	1.7e-09
241802_x_at	GRM2	glutamate receptor, metabotropic 2	2912	1.12302	1.02722	-1.06925	-1.07257	1.07344	1.87288	7.4973	26.1187	6.41e-09	3.94e-08
213845_at	GRIK2	glutamate receptor, ionotropic, kainate 2	2898	2.27909	1.24683	1.10129	1.21054	1.21094	1.87283	6.91477	34.7108	4.67e-10	3.91e-09
1556629_a_at	SNAP25	Synaptosomal-associated protein, 25kDa	6616	4.63783	1.26342	-1.02675	1.14378	-1.07497	1.87116	6.62722	119.134	2.77e-15	1.17e-13
238605_at	NOL4	nucleolar protein 4	8715	1.99307	1.44697	1.10074	1.72146	1.68627	1.86993	5.81887	35.0732	4.23e-10	3.6e-09
202073_at	OPTN	optineurin	10133	1.33772	1.17395	-1.2473	-1.13664	-1.15844	1.86756	8.23448	23.6928	1.54e-08	8.6e-08
1555403_a_at	CDH19	cadherin 19, type 2	28513	1.08727	-1.0465	1.18561	1.14613	1.04822	1.86455	3.94016	18.5656	1.31e-07	5.77e-07
201163_s_at	IGFBP7	insulin-like growth factor binding protein 7	3490	-6.66846	1.44588	1.46617	2.50204	2.04191	1.86403	9.51497	214.602	7.2e-18	6.8e-16
231577_s_at	GBP1	guanylate binding protein 1, interferon-inducible, 67kDa	2633	-1.01342	1.00891	1.06957	1.14952	1.38132	1.86203	3.78591	14.8762	8.53e-07	3.05e-06
210380_s_at	CACNA1G	calcium channel, voltage-dependent, T type, alpha 1G subunit	8913	1.79086	-1.08928	-1.01886	1.02774	1.13104	1.86107	6.1753	30.2298	1.68e-09	1.22e-08
205934_at	PLCL1	phospholipase C-like 1	5334	1.98143	1.19855	1.12025	1.25867	1.25408	1.85974	5.3176	12.4258	3.67e-06	1.13e-05
209685_s_at	PRKCB	protein kinase C, beta	5579	-1.40409	1.17018	-1.03862	-1.04344	1.07997	1.85643	7.17699	32.0488	9.81e-10	7.56e-09
227775_at	BRUNOL6	bruno-like 6, RNA binding protein (Drosophila)	60677	1.63308	-1.01917	1.09593	1.13117	1.32492	1.85613	6.04813	27.4917	4.02e-09	2.62e-08
233224_at	---	---	---	1.28578	1.40956	1.45005	1.61998	1.27404	1.85588	5.89646	20.4932	5.57e-08	2.69e-07
206349_at	LGI1	leucine-rich, glioma inactivated 1	9211	1.11735	1.32623	1.31263	1.9439	1.4465	1.8558	7.3013	19.3498	9.2e-08	4.19e-07
210561_s_at	WSB1	WD repeat and SOCS box-containing 1	26118	1.57664	1.34689	-1.00682	1.10648	-1.27266	1.85469	10.6869	21.1283	4.26e-08	2.11e-07
226275_at	MXD1	MAX dimerization protein 1	4084	2.12511	1.03229	-1.12507	1.01124	1.01061	1.85308	6.52134	60.2955	2.36e-12	3.93e-11
203484_at	SEC61G	Sec61 gamma subunit	23480	-1.46612	-1.01019	1.13617	1.11492	1.36273	1.85019	11.396	22.8324	2.15e-08	1.15e-07
1559190_s_at	RDH13	retinol dehydrogenase 13 (all-trans/9-cis)	112724	1.50608	1.06774	1.12255	1.01403	-1.0419	1.84851	5.30619	20.1103	6.57e-08	3.11e-07
237839_at	---	---	---	2.77473	1.544	1.2619	1.58401	1.53732	1.84666	6.62406	74.6709	2.9e-13	6.41e-12
203394_s_at	HES1	hairy and enhancer of split 1, (Drosophila)	3280	1.4909	-1.04129	-1.15553	-1.26758	-1.2589	1.84564	8.27916	23.7359	1.52e-08	8.48e-08
202942_at	ETFB	electron-transfer-flavoprotein, beta polypeptide	2109	1.52184	-1.0028	-1.26214	-1.12615	1.00087	1.84468	9.17029	34.6219	4.78e-10	4e-09
226641_at	---	---	---	4.38811	1.75021	1.45849	1.86026	1.22818	1.8442	6.55493	35.3686	3.91e-10	3.36e-09
205462_s_at	HPCAL1	hippocalcin-like 1	3241	1.11089	-1.03337	-1.1381	-1.18102	1.12171	1.84142	5.59879	13.923	1.47e-06	4.96e-06
37590_g_at	---	---	---	1.74349	-1.03482	-1.0967	-1.08576	-1.00333	1.84142	7.29464	73.7246	3.29e-13	7.09e-12
233555_s_at	SULF2	sulfatase 2	55959	-1.1259	-1.43109	-1.24693	-1.22726	-1.09303	1.8376	6.30976	14.4909	1.06e-06	3.7e-06
1553158_at	C3orf34	chromosome 3 open reading frame 34	84984	1.09531	1.21775	1.12219	1.15791	1.47366	1.83742	5.82672	6.52504	0.000384453	0.000743375
210302_s_at	MAB21L2	mab-21-like 2 (C. elegans)	10586	26.0588	1.07553	-1.17293	-1.02401	1.0896	1.83737	10.0128	320.571	1.2e-19	2.16e-17
234989_at	NCRNA00084	non-protein coding RNA 84	283131	1.96961	-1.27622	-1.16221	-1.2653	-1.70709	1.83688	8.75109	120.516	2.46e-15	1.06e-13
206765_at	KCNJ2	potassium inwardly-rectifying channel, subfamily J, member 2	3759	-1.25085	1.11772	1.09379	1.11908	1.33065	1.83512	6.60391	9.9131	2.09e-05	5.39e-05
204723_at	SCN3B	sodium channel, voltage-gated, type III, beta	55800	2.73773	1.04852	-1.25381	-1.06459	1.19964	1.83492	7.49621	63.1091	1.51e-12	2.7e-11
214811_at	RIMBP2	RIMS binding protein 2	23504	3.09679	1.17243	-1.03953	1.09458	1.10408	1.83453	7.10751	56.0709	4.79e-12	7.23e-11
204243_at	RLF	rearranged L-myc fusion	6018	1.08402	1.1861	1.17798	1.21815	1.08348	1.83351	8.78163	10.4784	1.38e-05	3.7e-05
1561657_at	---	---	---	1.77797	1.22182	-1.18351	1.06504	-1.19475	1.83247	5.82246	52.0504	9.86e-12	1.35e-10
224917_at	MIR21	microRNA 21	406991	-2.40175	-1.01294	1.22264	1.16153	1.6447	1.83232	7.1419	26.4967	5.63e-09	3.51e-08
217871_s_at	MIF	macrophage migration inhibitory factor (glycosylation-inhibiting factor)	4282	-1.21665	-1.22038	-1.46647	-1.83251	-1.36603	1.83076	12.0765	13.4612	1.93e-06	6.34e-06
1556962_at	---	---	---	1.37391	1.09036	1.28595	1.35162	1.45327	1.83065	6.37063	18.5116	1.35e-07	5.91e-07
214453_s_at	IFI44	interferon-induced protein 44	10561	1.34782	1.06875	1.24023	1.61446	1.69721	1.82857	5.34957	32.3643	8.96e-10	6.99e-09
235320_at	ARL6	ADP-ribosylation factor-like 6	84100	-1.02479	1.59752	1.60783	1.97238	1.45011	1.82701	7.2096	10.3182	1.55e-05	4.1e-05
240275_at	ARMC3	armadillo repeat containing 3	219681	1.17749	1.22217	1.24705	1.77376	1.50161	1.8269	5.13402	23.6961	1.54e-08	8.6e-08
236538_at	GRIA2	glutamate receptor, ionotropic, AMPA 2	2891	16.6757	1.81929	-1.02132	1.6353	1.44178	1.82558	7.61371	178.561	4.66e-17	3.47e-15
200795_at	SPARCL1	SPARC-like 1 (hevin)	8404	3.33271	1.40941	1.36716	2.02093	1.6162	1.82551	8.23336	64.8872	1.15e-12	2.12e-11
201761_at	MTHFD2	methylenetetrahydrofolate dehydrogenase (NADP+ dependent) 2, methenyltetrahydrofolate cyclohydrolase	10797	-4.41273	1.16937	1.12958	-1.05585	-1.29299	1.82409	10.1012	104.288	1.05e-14	3.68e-13
1553794_at	STOML3	stomatin (EPB72)-like 3	161003	-1.07627	1.12552	1.26184	1.38822	1.37753	1.8234	5.36066	18.0698	1.66e-07	7.09e-07
222670_s_at	MAFB	v-maf musculoaponeurotic fibrosarcoma oncogene homolog B (avian)	9935	1.57045	-1.1923	-1.06187	1.01475	1.00696	1.82026	8.0885	49.4518	1.62e-11	2.08e-10
215919_s_at	MRPS11	mitochondrial ribosomal protein S11	64963	-1.22116	1.19854	1.23153	1.23874	1.32339	1.81971	4.80095	23.0229	1.99e-08	1.08e-07
201082_s_at	DCTN1	dynactin 1 (p150, glued homolog, Drosophila)	1639	1.8581	-1.31528	-1.20886	-1.13459	1.04971	1.81879	5.7306	13.5959	1.78e-06	5.9e-06
225146_at	C9orf25	chromosome 9 open reading frame 25	203259	1.39278	-1.16932	-1.13163	-1.10178	1.12513	1.81866	7.84392	24.3369	1.21e-08	6.94e-08
231233_at	---	---	---	1.03595	-1.05839	-1.01245	1.05065	1.03551	1.81816	5.83168	11.8077	5.48e-06	1.62e-05
219425_at	SULT4A1	sulfotransferase family 4A, member 1	25830	1.22049	-1.05287	-1.08434	1.04843	-1.08051	1.8141	7.4622	25.1559	9.01e-09	5.34e-08
243173_at	CABP7	calcium binding protein 7	164633	2.92948	-1.07871	-1.24103	-1.18319	-1.40322	1.81254	6.60531	46.4031	2.98e-11	3.55e-10
230660_at	SERTAD4	SERTA domain containing 4	56256	1.82334	1.14062	1.16976	1.45884	1.47502	1.80793	7.75398	42.8799	6.34e-11	6.82e-10
1562529_s_at	---	---	---	-1.15633	1.19208	1.08381	1.02899	-1.16965	1.80791	6.33787	10.9874	9.58e-06	2.67e-05
230144_at	GRIA3	glutamate receptor, ionotrophic, AMPA 3	2892	3.65902	1.57108	1.09019	1.61573	1.30568	1.80675	5.94254	33.8533	5.89e-10	4.81e-09
232293_at	LCORL	ligand dependent nuclear receptor corepressor-like	254251	1.76821	1.21011	1.54693	1.59514	1.38856	1.80508	6.74595	24.8955	9.89e-09	5.8e-08
208291_s_at	TH	tyrosine hydroxylase	7054	2.26312	-1.12435	-1.58162	-1.19347	-1.03317	1.80315	6.32794	21.1561	4.22e-08	2.09e-07
201117_s_at	CPE	carboxypeptidase E	1363	1.42195	1.30114	-1.01427	1.25768	1.13062	1.80211	10.2097	18.6276	1.28e-07	5.63e-07
204722_at	SCN3B	sodium channel, voltage-gated, type III, beta	55800	2.69088	1.00239	-1.29213	-1.11396	1.0567	1.80148	8.48241	77.7951	1.93e-13	4.49e-12
242482_at	PRKAR1A	protein kinase, cAMP-dependent, regulatory, type I, alpha (tissue specific extinguisher 1)	5573	-1.01439	1.2282	1.24387	1.29383	-1.02591	1.79998	5.66147	10.3413	1.52e-05	4.04e-05
204365_s_at	REEP1	receptor accessory protein 1	65055	2.92778	1.32359	1.00899	1.25387	1.24097	1.79958	8.88352	69.9441	5.52e-13	1.11e-11
218559_s_at	MAFB	v-maf musculoaponeurotic fibrosarcoma oncogene homolog B (avian)	9935	2.14721	1.11038	-1.21342	-1.07174	-1.32204	1.79827	8.26877	55.189	5.59e-12	8.23e-11
220131_at	FXYD7	FXYD domain containing ion transport regulator 7	53822	-1.04315	-1.06814	-1.19016	-1.10523	1.20051	1.79786	6.03104	8.98174	4.31e-05	0.000103564
218507_at	C7orf68	chromosome 7 open reading frame 68	29923	-1.13928	1.13312	-1.01691	-1.03062	-1.14336	1.79768	8.77447	43.6444	5.35e-11	5.9e-10
230237_at	ADCYAP1	adenylate cyclase activating polypeptide 1 (pituitary)	116	3.84283	1.39793	-1.0707	1.3374	1.24181	1.79457	7.69344	66.8766	8.58e-13	1.63e-11
205818_at	DBC1	deleted in bladder cancer 1	1620	-1.44418	1.14393	1.01898	1.27197	1.30628	1.79366	7.42041	19.1639	1e-07	4.52e-07
227623_at	---	---	---	1.96325	1.44456	1.09224	1.52896	1.26973	1.79227	9.91933	52.0395	9.88e-12	1.35e-10
209839_at	DNM3	dynamin 3	26052	1.81547	1.18711	-1.04471	1.24082	1.32914	1.79158	7.26569	19.7881	7.57e-08	3.53e-07
1556047_s_at	MAGEE1	melanoma antigen family E, 1	57692	1.12937	-1.08821	1.0685	1.17418	1.18308	1.78908	7.92894	16.9193	2.91e-07	1.17e-06
216093_at	---	---	---	1.8463	1.33884	-1.16717	1.30951	1.01864	1.78784	6.15158	19.7855	7.58e-08	3.53e-07
212421_at	C22orf9	chromosome 22 open reading frame 9	23313	1.00397	1.02663	-1.2258	-1.10985	-1.11302	1.78745	6.59007	21.7259	3.33e-08	1.7e-07
223721_s_at	DNAJC12	DnaJ (Hsp40) homolog, subfamily C, member 12	56521	1.68094	-1.04889	1.20374	-1.0778	1.20189	1.7866	6.8646	9.75855	2.35e-05	5.99e-05
210303_at	MAB21L2	mab-21-like 2 (C. elegans)	10586	2.41988	1.32464	1.00148	1.19848	1.16318	1.78494	6.61582	16.396	3.79e-07	1.48e-06
202202_s_at	LAMA4	laminin, alpha 4	3910	3.15059	1.35031	1.01055	1.0461	-1.1609	1.78406	6.20533	37.5989	2.2e-10	2.03e-09
225799_at	LOC541471 /// NCRNA00152	hypothetical LOC541471 /// non-protein coding RNA 152	112597 /// 541471	-15.6198	1.01057	1.19808	1.21925	1.58311	1.78185	7.30869	245.101	1.86e-18	2.2e-16
213904_at	---	---	---	2.08334	1.11745	-1.02724	1.13797	1.14547	1.78178	6.87701	24.8917	9.91e-09	5.8e-08
229302_at	TMEM178	transmembrane protein 178	130733	1.49597	1.13782	-1.28119	1.02665	-1.01454	1.78163	9.28322	33.9325	5.77e-10	4.72e-09
222890_at	CCDC113	coiled-coil domain containing 113	29070	1.61753	1.06078	-1.07067	1.04238	-1.23319	1.78088	5.8077	33.9851	5.68e-10	4.66e-09
213672_at	MARS	methionyl-tRNA synthetase	4141	1.6381	1.11141	1.06964	1.22608	1.43387	1.77844	6.49219	18.9577	1.1e-07	4.92e-07
1552754_a_at	CADM2	cell adhesion molecule 2	253559	1.09536	1.34121	1.37991	1.73796	1.44596	1.77825	4.98577	6.17002	0.000548927	0.00102568
230220_at	C2orf21	chromosome 2 open reading frame 21	285175	1.94207	1.29743	1.02317	1.32724	1.11423	1.7732	4.69935	21.222	4.1e-08	2.04e-07
201296_s_at	WSB1	WD repeat and SOCS box-containing 1	26118	2.24846	1.01213	-1.1593	-1.12984	-1.3536	1.77259	11.1908	142.106	4.69e-16	2.57e-14
226018_at	C7orf41	chromosome 7 open reading frame 41	222166	6.55808	-1.04702	-1.4768	-1.14825	-1.06376	1.77207	7.61919	131.877	9.96e-16	4.86e-14
48030_i_at	C5orf4	chromosome 5 open reading frame 4	10826	1.10959	-1.11457	1.55746	1.57896	1.71869	1.77206	10.1196	73.6871	3.31e-13	7.11e-12
212223_at	IDS	iduronate 2-sulfatase	3423	-1.20768	1.16783	1.0722	1.18371	1.11073	1.77176	7.38927	15.5407	5.94e-07	2.2e-06
221805_at	NEFL	neurofilament, light polypeptide	4747	3.0407	1.20341	-1.47261	-1.16532	-1.07854	1.76948	10.2346	137.298	6.64e-16	3.44e-14
236657_at	LOC100130506	hypothetical protein LOC100130506	100130506	-1.76023	-1.04059	-1.07506	1.19388	1.31326	1.7694	7.30667	13.7125	1.66e-06	5.54e-06
222967_at	SLC5A7	solute carrier family 5 (choline transporter), member 7	60482	1.69098	1.30198	1.20063	1.25383	1.08406	1.76874	6.01176	23.2332	1.84e-08	1e-07
202022_at	ALDOC	aldolase C, fructose-bisphosphate	230	-1.02966	-1.0782	-1.10055	-1.23687	-1.19027	1.76873	7.91727	38.8422	1.62e-10	1.54e-09
213533_at	D4S234E	DNA segment on chromosome 4 (unique) 234 expressed sequence	27065	1.73001	1.15554	-1.05073	1.06474	1.20133	1.76785	8.75343	81.3252	1.25e-13	3.04e-12
218750_at	TAF1D	TATA box binding protein (TBP)-associated factor, RNA polymerase I, D, 41kDa	79101	-2.49762	1.41303	1.43618	1.34498	1.01698	1.76722	7.59515	11.0709	9.04e-06	2.54e-05
213866_at	SAMD14	sterile alpha motif domain containing 14	201191	1.35848	-1.02185	-1.08598	-1.09889	1.12655	1.76691	7.172	21.6871	3.39e-08	1.72e-07
237585_at	C4orf47	chromosome 4 open reading frame 47	441054	1.13528	-1.10515	1.01137	1.15431	1.01943	1.76661	5.29207	18.5909	1.3e-07	5.71e-07
214120_at	RFPL1S	RFPL1 antisense RNA (non-protein coding)	10740	1.74011	1.14135	-1.16175	1.01323	-1.03085	1.76619	5.69445	36.3993	2.99e-10	2.66e-09
206777_s_at	CRYBB2 /// CRYBB2P1	crystallin, beta B2 /// crystallin, beta B2 pseudogene 1	1415 /// 1416	-1.17555	1.05925	1.04853	-1.09318	1.18697	1.76584	5.68683	6.27253	0.000494695	0.000934214
230267_at	---	---	---	-1.2376	1.33306	1.29902	1.37423	1.29032	1.76461	5.69858	4.58329	0.00314947	0.00501833
205478_at	PPP1R1A	protein phosphatase 1, regulatory (inhibitor) subunit 1A	5502	2.5531	-1.00098	-1.21973	1.00784	1.08699	1.76294	7.87353	39.6089	1.35e-10	1.31e-09
204298_s_at	LOX	lysyl oxidase	4015	-1.47486	-1.07733	1.08745	1.0438	1.23334	1.76136	5.18608	21.8917	3.12e-08	1.6e-07
223627_at	MEX3B	mex-3 homolog B (C. elegans)	84206	3.01151	1.10218	-1.09104	1.06431	1.08439	1.76062	7.60185	45.7231	3.43e-11	4e-10
229294_at	JPH3	junctophilin 3	57338	-1.01578	-1.06633	-1.28833	-1.15773	-1.02937	1.75705	6.35031	16.6843	3.27e-07	1.3e-06
1555991_s_at	C22orf42	chromosome 22 open reading frame 42	150297	1.05705	1.1499	1.33494	1.4093	1.79709	1.75704	5.65765	13.8004	1.58e-06	5.3e-06
219737_s_at	PCDH9	protocadherin 9	5101	8.41903	1.00924	-1.21096	-1.05221	1.14245	1.75661	9.31832	49.5722	1.58e-11	2.04e-10
230104_s_at	TPPP	tubulin polymerization promoting protein	11076	1.84277	-1.08679	-1.05606	1.03467	1.01403	1.75564	7.4022	59.6166	2.64e-12	4.31e-11
227742_at	CLIC6	chloride intracellular channel 6	54102	1.39529	1.00548	-1.09023	1.89479	1.80639	1.75493	7.55669	50.1478	1.41e-11	1.84e-10
212819_at	ASB1	ankyrin repeat and SOCS box-containing 1	51665	1.31095	-1.01876	-1.00266	-1.05272	-1.19293	1.75484	4.94326	16.702	3.24e-07	1.29e-06
213664_at	SLC1A1	solute carrier family 1 (neuronal/epithelial high affinity glutamate transporter, system Xag), member 1	6505	-4.91521	1.2139	1.03868	-1.03628	-1.14518	1.75261	6.38193	45.6419	3.49e-11	4.06e-10
206488_s_at	CD36	CD36 molecule (thrombospondin receptor)	948	-1.99513	1.0197	1.08494	1.12419	1.12029	1.75145	4.76281	19.8132	7.49e-08	3.49e-07
208736_at	ARPC3	actin related protein 2/3 complex, subunit 3, 21kDa	10094	-1.53829	-1.06345	-1.17144	-1.16844	1.00056	1.75021	9.44466	8.14941	8.62e-05	0.000193128
212227_x_at	EIF1	eukaryotic translation initiation factor 1	10209	1.7436	-1.05819	-1.28648	-1.23273	-1.03462	1.7502	11.7567	55.2595	5.52e-12	8.15e-11
212339_at	EPB41L1	erythrocyte membrane protein band 4.1-like 1	2036	2.10083	-1.2033	-1.55478	-1.29788	1.02427	1.74952	6.55348	32.4379	8.77e-10	6.87e-09
236360_at	FLJ42875	hypothetical LOC440556	440556	1.32699	1.04523	1.08328	1.32919	1.07261	1.7491	4.59439	26.7764	5.12e-09	3.23e-08
221236_s_at	STMN4	stathmin-like 4	81551	6.54729	-1.02836	-1.62368	-1.2048	1.00767	1.74896	8.96572	87.8566	5.8e-14	1.56e-12
203549_s_at	LPL	lipoprotein lipase	4023	-1.22758	1.18031	1.28969	1.56086	1.50343	1.74847	8.16925	13.6499	1.73e-06	5.73e-06
223817_at	LRRIQ1	leucine-rich repeats and IQ motif containing 1	84125	1.14191	1.1844	1.44527	1.58828	1.41429	1.74645	5.17844	19.246	9.63e-08	4.38e-07
225812_at	C6orf225	chromosome 6 open reading frame 225	619208	1.24368	1.1699	1.15542	1.29964	1.42389	1.74559	8.87876	10.9599	9.76e-06	2.72e-05
1566785_x_at	LOC728806	Similar to Vesicle-fusing ATPase (Vesicular-fusion protein NSF) (N-ethylmaleimide sensitive fusion protein) (NEM-sensitive fusion protein)	728806	1.30603	1.1431	1.54895	1.68923	1.58947	1.74358	7.37712	47.9055	2.19e-11	2.73e-10
234033_at	---	---	---	1.11168	1.2178	1.0189	1.06613	-1.08436	1.74121	6.32379	13.9401	1.45e-06	4.92e-06
1554140_at	WDR78	WD repeat domain 78	79819	1.31715	1.00018	1.44064	1.71829	1.54491	1.74118	4.6163	22.6471	2.31e-08	1.23e-07
236656_s_at	LOC100130506	hypothetical protein LOC100130506	100130506	-2.51616	1.29779	1.08329	1.28864	1.36409	1.74034	7.86973	44.4033	4.54e-11	5.1e-10
208056_s_at	CBFA2T3	core-binding factor, runt domain, alpha subunit 2; translocated to, 3	863	1.20499	-1.16602	1.0494	1.12225	1.25709	1.74033	5.86336	19.6612	8e-08	3.71e-07
209610_s_at	SLC1A4	solute carrier family 1 (glutamate/neutral amino acid transporter), member 4	6509	2.3576	-1.0001	-1.42398	-1.06452	1.07348	1.74005	7.02445	84.2408	8.8e-14	2.25e-12
232111_at	LOC730125	Hypothetical LOC730125	730125	-2.68344	1.02599	-1.05273	1.04428	1.1627	1.73921	7.32973	69.0968	6.22e-13	1.23e-11
1560587_s_at	PRDX5	peroxiredoxin 5	25824	-1.09911	-1.02208	1.15263	1.02908	1.44662	1.73914	10.7753	5.2144	0.00152167	0.00258829
233516_s_at	SPAG17	sperm associated antigen 17	200162	1.11978	1.09995	1.12376	1.40212	1.27253	1.73819	6.00371	10.7797	1.11e-05	3.05e-05
201939_at	PLK2	polo-like kinase 2 (Drosophila)	10769	-3.29024	1.22419	1.08617	1.09554	-1.04605	1.73733	8.57358	37.4886	2.26e-10	2.08e-09
202855_s_at	SLC16A3	solute carrier family 16, member 3 (monocarboxylic acid transporter 4)	9123	1.30993	-1.01052	1.08552	-1.29008	-1.09722	1.73718	5.6047	14.2877	1.19e-06	4.11e-06
218976_at	DNAJC12	DnaJ (Hsp40) homolog, subfamily C, member 12	56521	3.22697	1.33904	1.28897	1.14101	1.16039	1.73649	8.18179	96.9684	2.17e-14	6.78e-13
209983_s_at	NRXN2	neurexin 2	9379	1.05078	-1.02436	-1.31802	-1.11295	-1.00969	1.73512	6.10532	18.0495	1.68e-07	7.15e-07
64408_s_at	CALML4	calmodulin-like 4	91860	1.32812	-1.05448	1.03486	1.13675	1.25419	1.7347	5.97269	19.7503	7.7e-08	3.58e-07
1556194_a_at	---	---	---	2.25987	1.39242	1.17934	1.52484	1.36007	1.7347	6.09729	65.0324	1.13e-12	2.08e-11
214211_at	FTH1	ferritin, heavy polypeptide 1	2495	-2.47954	1.28463	1.08741	1.14783	1.16451	1.73465	9.0375	42.7429	6.53e-11	7e-10
212810_s_at	SLC1A4	solute carrier family 1 (glutamate/neutral amino acid transporter), member 4	6509	1.96084	1.04487	-1.06713	1.20895	1.23056	1.73324	7.46395	27.3591	4.21e-09	2.72e-08
241612_at	FOXD3	forkhead box D3	27022	-2.88185	1.05117	-1.16712	-1.3487	-1.47919	1.73241	4.91925	69.9315	5.53e-13	1.11e-11
227168_at	MIAT	myocardial infarction associated transcript (non-protein coding)	440823	8.26185	1.04463	-1.55189	-1.29676	-1.25552	1.73221	10.505	200.521	1.44e-17	1.25e-15
1552626_a_at	TMEM163	transmembrane protein 163	81615	3.0271	1.01464	-1.54854	-1.15245	-1.02201	1.73162	7.97081	79.1419	1.63e-13	3.86e-12
1556743_at	---	---	---	1.44841	1.33301	1.26847	1.34612	-1.01985	1.73041	5.79183	14.136	1.3e-06	4.44e-06
243163_at	---	---	---	2.65893	1.15635	-1.21219	1.13654	1.16761	1.7292	5.78232	23.8832	1.44e-08	8.08e-08
205358_at	GRIA2	glutamate receptor, ionotropic, AMPA 2	2891	13.524	1.35689	1.00123	1.45661	1.28614	1.72732	8.40264	392.932	1.49e-20	3.91e-18
203961_at	NEBL	nebulette	10529	-1.88126	1.23819	1.19531	1.21692	1.03289	1.72597	7.52117	27.4996	4.01e-09	2.62e-08
206042_x_at	SNRPN /// SNURF	small nuclear ribonucleoprotein polypeptide N /// SNRPN upstream reading frame	6638 /// 8926	-3.20287	-1.17351	-1.65063	-1.47315	1.216	1.72438	9.48828	8.74239	5.24e-05	0.000123353
227705_at	TCEAL7	transcription elongation factor A (SII)-like 7	56849	1.94279	1.31131	1.09874	1.37292	1.45143	1.72412	10.7511	129.97	1.15e-15	5.5e-14
220334_at	RGS17	regulator of G-protein signaling 17	26575	-1.156	1.25336	-1.06003	1.15932	1.25506	1.72376	7.89843	24.5608	1.12e-08	6.45e-08
229674_at	SERTAD4	SERTA domain containing 4	56256	3.11207	1.21021	-1.15349	1.14523	1.04537	1.72361	8.17333	50.7909	1.25e-11	1.66e-10
213822_s_at	UBE3B	ubiquitin protein ligase E3B	89910	-3.78663	1.28942	1.60588	1.47281	1.61362	1.72226	7.00035	46.2797	3.06e-11	3.63e-10
225283_at	ARRDC4	arrestin domain containing 4	91947	1.25591	1.15926	1.16211	1.05742	-1.4368	1.72225	8.13388	9.59493	2.66e-05	6.69e-05
242201_at	PMS2L5	Postmeiotic segregation increased 2-like 5	5383	-1.1888	1.20586	1.06545	1.13821	1.22079	1.72168	4.67929	7.52914	0.000148892	0.000315495
244694_at	IGLON5	IgLON family member 5	402665	2.21968	-1.23319	-1.41963	-1.40253	-1.05891	1.72166	7.57216	23.3751	1.74e-08	9.58e-08
224604_at	C4orf3	chromosome 4 open reading frame 3	401152	1.75594	1.0927	-1.05828	-1.06175	-1.11078	1.71948	10.4092	74.3964	3.01e-13	6.6e-12
231856_at	KIAA1244	KIAA1244	57221	-1.64307	1.20694	1.04044	1.0625	1.02817	1.71945	4.07698	14.519	1.04e-06	3.65e-06
237056_at	INSC	inscuteable homolog (Drosophila)	387755	2.20948	1.10158	1.26284	-1.16217	-1.36134	1.71798	5.45776	29.1588	2.35e-09	1.63e-08
202021_x_at	EIF1	eukaryotic translation initiation factor 1	10209	1.75953	-1.07134	-1.27517	-1.2139	-1.0963	1.71618	11.7637	63.9592	1.33e-12	2.41e-11
237330_at	---	---	---	1.15018	1.03018	1.32543	1.39393	1.15309	1.71525	5.04668	20.3535	5.92e-08	2.83e-07
228422_at	LHFPL4	lipoma HMGIC fusion partner-like 4	375323	-1.07242	-1.12235	-1.02584	1.08578	1.28371	1.71457	7.40029	26.731	5.2e-09	3.28e-08
1568611_at	---	---	---	1.20518	-1.22684	-1.17312	-1.13173	-1.0964	1.71399	6.58763	26.9363	4.85e-09	3.08e-08
203180_at	ALDH1A3	aldehyde dehydrogenase 1 family, member A3	220	-6.82329	1.12108	-1.02169	1.06075	1.14196	1.7135	5.54974	97.3456	2.09e-14	6.55e-13
230763_at	SPATA17	spermatogenesis associated 17	128153	1.14907	1.20033	1.40738	1.65313	1.60715	1.71289	6.35229	13.7287	1.65e-06	5.5e-06
244260_at	---	---	---	1.23719	1.14749	1.34217	1.25757	1.38254	1.71256	4.48083	12.236	4.14e-06	1.26e-05
204471_at	GAP43	growth associated protein 43	2596	4.61069	1.13245	-1.01304	1.39196	1.47564	1.71229	11.5802	269.824	6.98e-19	9.73e-17
227044_at	---	---	---	-1.3932	1.16842	1.29194	1.22154	1.31447	1.71204	6.69703	8.27068	7.77e-05	0.00017608
208078_s_at	SIK1	salt-inducible kinase 1	150094	-1.0768	-1.13398	1.02315	-1.1419	-1.06846	1.70972	6.66604	22.8155	2.16e-08	1.16e-07
226213_at	ERBB3	v-erb-b2 erythroblastic leukemia viral oncogene homolog 3 (avian)	2065	1.23226	-1.09399	-1.13955	-1.84999	-2.07663	1.70959	8.54509	132.424	9.56e-16	4.71e-14
230151_at	C13orf1	chromosome 13 open reading frame 1	57213	1.02466	1.1037	1.2531	1.25479	1.31353	1.70956	5.65824	13.5441	1.84e-06	6.07e-06
210091_s_at	DTNA	dystrobrevin, alpha	1837	-4.14665	1.12036	-1.02832	1.18713	1.0644	1.70778	5.57038	78.4196	1.79e-13	4.19e-12
219896_at	CALY	calcyon neuron-specific vesicular protein	50632	-1.01546	-1.05716	1.02144	-1.03593	1.28073	1.70537	5.07137	11.6878	5.93e-06	1.74e-05
226632_at	CYGB	cytoglobin	114757	-1.28986	-1.15205	-1.02326	-1.04954	-1.04098	1.7053	6.99856	19.6015	8.22e-08	3.79e-07
204411_at	KIF21B	kinesin family member 21B	23046	2.29693	-1.13192	-1.50655	-1.31327	-1.08238	1.70402	8.32488	99.0074	1.76e-14	5.68e-13
235696_at	---	---	---	-2.44848	1.21667	1.27916	1.10387	1.00659	1.7032	8.43315	45.9722	3.26e-11	3.83e-10
227329_at	ZBTB46	zinc finger and BTB domain containing 46	140685	1.37809	1.03014	-1.30497	-1.14653	-1.16751	1.70253	6.93982	21.6064	3.5e-08	1.77e-07
213802_at	---	---	---	1.08602	1.04288	-1.02498	-1.06689	-1.02232	1.70233	4.70539	7.89083	0.000107868	0.0002362
238551_at	FUT11	fucosyltransferase 11 (alpha (1,3) fucosyltransferase)	170384	-1.27824	1.05742	1.07709	1.07577	1.09149	1.70136	4.91922	16.5271	3.54e-07	1.39e-06
201387_s_at	UCHL1	ubiquitin carboxyl-terminal esterase L1 (ubiquitin thiolesterase)	7345	-1.61882	1.09085	-1.24801	1.04237	1.3454	1.70122	11.4819	16.8772	2.97e-07	1.19e-06
204953_at	SNAP91	synaptosomal-associated protein, 91kDa homolog (mouse)	9892	4.93087	1.19486	-1.1168	1.25065	1.1229	1.70109	7.92382	110.221	6.04e-15	2.29e-13
213293_s_at	TRIM22	tripartite motif-containing 22	10346	-69.3203	1.10092	1.27902	1.53905	1.61636	1.70091	6.9015	738.345	2.29e-23	1.89e-20
232208_at	ISLR2	immunoglobulin superfamily containing leucine-rich repeat 2	57611	1.09098	-1.1164	1.10831	1.08916	1.32915	1.70077	7.00838	26.9347	4.85e-09	3.08e-08
213436_at	CNR1	cannabinoid receptor 1 (brain)	1268	31.9127	1.13067	-1.34562	1.10866	1.04201	1.6999	9.66036	508.144	1.07e-21	4.62e-19
202820_at	AHR	aryl hydrocarbon receptor	196	-2.4015	1.09529	1.16627	1.03402	-1.06549	1.6981	5.40597	60.6334	2.24e-12	3.75e-11
203895_at	PLCB4	phospholipase C, beta 4	5332	-1.13815	1.21471	1.20629	1.10174	-1.22618	1.69743	7.79639	11.6814	5.96e-06	1.75e-05
223172_s_at	MTP18	mitochondrial protein 18 kDa	51537	-1.86505	-1.08198	-1.13994	-1.07199	1.01898	1.69701	8.18687	45.923	3.29e-11	3.86e-10
242428_at	DCUN1D1	DCN1, defective in cullin neddylation 1, domain containing 1 (S. cerevisiae)	54165	1.02661	1.05075	-1.02352	1.02859	-1.01838	1.69589	6.38179	11.8344	5.38e-06	1.59e-05
219947_at	CLEC4A	C-type lectin domain family 4, member A	50856	1.02763	1.21704	1.21724	1.28415	1.17468	1.69579	4.01464	10.712	1.16e-05	3.19e-05
1565566_a_at	---	---	---	-1.18028	1.19782	1.30301	1.35757	1.15144	1.69568	4.34358	10.9038	1.02e-05	2.82e-05
220889_s_at	CA10	carbonic anhydrase X	56934	1.36456	1.22085	1.00472	1.42001	1.54021	1.69508	5.39619	20.5824	5.37e-08	2.59e-07
203930_s_at	MAPT	microtubule-associated protein tau	4137	1.17325	-1.26851	-1.09022	-1.09536	1.14375	1.69316	6.08348	16.8519	3.01e-07	1.2e-06
239349_at	C1QTNF7	C1q and tumor necrosis factor related protein 7	114905	1.98161	1.0884	1.31108	1.50307	1.41428	1.69246	5.47065	62.6331	1.63e-12	2.86e-11
203232_s_at	ATXN1	ataxin 1	6310	1.66674	1.25269	1.08579	1.28485	-1.03692	1.6921	6.84928	15.3538	6.57e-07	2.41e-06
203485_at	RTN1	reticulon 1	6252	121.95	1.29409	-1.0445	1.26179	1.46748	1.69167	10.9185	1750.77	3.11e-27	2.01e-23
219232_s_at	EGLN3	egl nine homolog 3 (C. elegans)	112399	-5.68994	-1.06945	1.01769	-1.06118	1.01457	1.69113	5.58223	112.954	4.72e-15	1.86e-13
205113_at	NEFM	neurofilament, medium polypeptide	4741	21.3123	-1.00823	-1.87024	-1.38767	-1.52195	1.68969	10.9881	767.427	1.54e-23	1.38e-20
240419_at	SLC6A15	solute carrier family 6 (neutral amino acid transporter), member 15	55117	-1.08246	1.1489	1.24396	1.25548	-1.01646	1.68922	6.23643	6.82695	0.000286517	0.000569814
203724_s_at	RUFY3	RUN and FYVE domain containing 3	22902	23.193	1.39533	1.10881	1.55315	1.36021	1.68875	9.35927	171.52	7.01e-17	4.97e-15
1559391_s_at	---	---	---	-1.21803	1.20992	1.40586	1.39447	1.13506	1.68852	5.54297	9.34359	3.23e-05	7.98e-05
238295_at	C17orf42	Chromosome 17 open reading frame 42	79736	1.63505	-1.02781	1.15562	1.30755	1.28965	1.68849	7.00991	29.2108	2.31e-09	1.61e-08
212425_at	SCAMP1	secretory carrier membrane protein 1	9522	-1.03837	1.09939	1.19376	1.21045	1.33871	1.688	6.50038	13.4207	1.98e-06	6.49e-06
205311_at	DDC	dopa decarboxylase (aromatic L-amino acid decarboxylase)	1644	1.63811	1.09545	1.03286	-1.06035	1.05528	1.68713	7.05752	30.8566	1.39e-09	1.03e-08
220591_s_at	EFHC2	EF-hand domain (C-terminal) containing 2	80258	1.06076	1.09332	1.15247	1.43309	1.23644	1.68361	6.01199	7.20779	0.000199913	0.000410848
201689_s_at	TPD52	tumor protein D52	7163	-2.66533	1.42552	-1.05399	1.0814	-1.15558	1.68346	7.67377	15.5312	5.97e-07	2.21e-06
230273_at	C6orf165	chromosome 6 open reading frame 165	154313	1.0996	1.25741	1.359	1.70426	1.76196	1.68334	7.11676	20.5514	5.44e-08	2.63e-07
207196_s_at	TNIP1	TNFAIP3 interacting protein 1	10318	-1.3857	-1.08646	-1.06732	-1.27956	-1.25478	1.68318	7.1041	21.205	4.13e-08	2.06e-07
228458_at	C6orf226	chromosome 6 open reading frame 226	441150	-1.02593	1.33996	1.3696	1.32276	1.47288	1.68306	7.76704	18.281	1.5e-07	6.5e-07
235337_at	---	---	---	2.01236	1.09504	1.07209	1.29147	1.35647	1.6813	7.21678	29.1026	2.39e-09	1.66e-08
221478_at	BNIP3L	BCL2/adenovirus E1B 19kDa interacting protein 3-like	665	2.78152	1.15293	-1.01711	1.01525	-1.36162	1.68118	11.0896	35.8709	3.43e-10	2.99e-09
233944_at	---	---	---	4.85937	1.51536	-1.00403	1.59306	1.48868	1.68107	6.43642	133.712	8.67e-16	4.34e-14
236838_at	SNIP	SNAP25-interacting protein	80725	1.21607	1.02885	1.03039	1.07473	1.22743	1.67908	8.13134	20.0703	6.69e-08	3.16e-07
238501_at	---	---	---	1.1292	1.20903	1.20628	1.22398	1.37216	1.67867	6.61277	10.1655	1.73e-05	4.54e-05
228600_x_at	C7orf46	chromosome 7 open reading frame 46	340277	-1.89015	1.31982	1.09873	1.21424	1.11352	1.67859	7.91727	19.4347	8.85e-08	4.05e-07
223644_s_at	CRYGS	crystallin, gamma S	1427	1.03585	-1.12108	-1.14866	-1.10453	-1.095	1.67857	6.59372	12.4192	3.68e-06	1.14e-05
202393_s_at	KLF10	Kruppel-like factor 10	7071	-1.2476	1.26326	1.10728	-1.00275	-1.21706	1.67843	8.42953	12.9737	2.6e-06	8.28e-06
231978_at	TPCN2	two pore segment channel 2	219931	1.21664	-1.00667	1.01001	-1.09218	-1.04451	1.67725	4.66456	9.2635	3.44e-05	8.44e-05
210127_at	RAB6B	RAB6B, member RAS oncogene family	51560	-1.29247	1.01152	1.05735	1.13637	1.33781	1.67708	6.24764	21.2401	4.07e-08	2.03e-07
225379_at	MAPT	microtubule-associated protein tau	4137	1.88926	-1.12865	-1.31216	-1.17929	1.07379	1.67703	8.57358	29.574	2.06e-09	1.45e-08
231726_at	PCDHB14	protocadherin beta 14	56122	3.47736	1.00222	-1.0596	1.23377	1.08377	1.67695	5.59887	107.381	7.84e-15	2.89e-13
213609_s_at	SEZ6L	seizure related 6 homolog (mouse)-like	23544	2.66064	-1.01388	-1.42059	-1.18825	-1.19693	1.67686	7.06968	30.9943	1.34e-09	9.91e-09
222450_at	PMEPA1	prostate transmembrane protein, androgen induced 1	56937	1.26351	1.28209	1.0008	1.25963	1.16486	1.67595	7.53606	15.576	5.83e-07	2.16e-06
[truncated: 24,911 more rows]
