# Supplementary material for: Identification of Thalidomide-Specific Transcriptomics and Proteomics Signatures during Differentiation of Human Embryonic Stem Cells
Source: PLoS One. 2012 Aug 28;7(8):e44228. doi: 10.1371/journal.pone.0044228 (PMC3429450; doi:10.1371/journal.pone.0044228)
Supplement: Table S5 — The 61 regulated protein spots identified from 2DE analysis of hESC differentiation over 14 days using mass spectrometry. (XLS) [file pone.0044228.s009.xls]

## Sheet: Table S5
Spot ID		Protein Name	Gene Symbol	Score	Mass	Matches	Sequences	emPAI	Protein description	% V ES				% V 14 days old Ebs				Fold change	Regulation
										A	B	C	Average	A	B	C	Average
21921	1.1	TIF1B_HUMAN	TRIM28	191	88493	9 (6)	9 (6)	0.24	Transcription intermediary factor 1-beta OS=	0.0809	0.0843	0.1095	0.0915667	0.0019	0.0036	0.0029	0.0028	-32.7024	down
21922	1.1	TIF1B_HUMAN	TRIM28	142	88493	9 (5)	8 (5)	0.2	Transcription intermediary factor 1-beta OS=	0.0539	0.0509	0.0719	0.0589	0.0021	0.0039	0.0029	0.00296667	-19.8539	down
21923	1.1	HNRPF_HUMAN	HNRNPF	103	45643	2 (2)	2 (2)	0.15	Heterogeneous nuclear ribonucleoprotein F OS	0.0331	0.0201	0.03	0.0277333	0.0032	0.0035	0.0056	0.0041	-6.76423	down
22069	2.1	EF2_HUMAN	EEF2	159	95277	14 (7)	12 (7)	0.27	Elongation factor 2 OS=Homo sapiens GN=EEF2	0.2678	0.3004	0.264	0.2774	0.1466	0.1252	0.1033	0.125033	-2.21861	down
22075	1.1	EF2_HUMAN	EEF2	264	95277	35 (15)	29 (14)	0.61	Elongation factor 2 OS=Homo sapiens GN=EEF2	0.222	0.2286	0.2022	0.2176	0.1502	0.1118	0.0899	0.1173	-1.85507	down
22084	1.1	EF2_HUMAN	EEF2	205	95277	27 (15)	23 (13)	0.61	Elongation factor 2 OS=Homo sapiens GN=EEF2	0.24	0.244	0.2594	0.2478	0.1023	0.0714	0.0679	0.0805333	-3.07699	down
22085	1.1	EF2_HUMAN	EEF2	161	95277	19 (8)	16 (6)	0.22	Elongation factor 2 OS=Homo sapiens GN=EEF2	0.1852	0.1688	0.2138	0.189267	0.0801	0.0794	0.0808	0.0801	-2.36288	down
22144	1.1	FUBP2_HUMAN	KHSRP	375	73070	22 (13)	19 (12)	0.77	Far upstream element-binding protein 2 OS=	0.0805	0.0942	0.0809	0.0852	0.0309	0.0347	0.037	0.0342	-2.49123	down
22158	1.1	RBM14_HUMAN	RBM14	273	69449	16 (10)	15 (10)	0.59	RNA-binding protein 14 OS=Homo sapiens GN	0.0805	0.0942	0.0809	0.0852	0.0309	0.0347	0.037	0.0342	-2.49123	down
22158	2.1	DHB4_HUMAN	HSD17B4	238	79636	11 (8)	10 (7)	0.38	Peroxisomal multifunctional enzyme type 2	0.1717	0.1471	0.219	0.179267	0.0366	0.0437	0.0355	0.0386	-4.64421	down
22170	1.1	XRCC5_HUMAN	XRCC5	181	82652	18 (8)	16 (8)	0.36	X-ray repair cross-complementing protein 5	0.0739	0.0767	0.0623	0.0709667	0.0181	0.0149	0.0092	0.0140667	-5.04502	down
22170	2.1	IMMT_HUMAN	IMMT	154	83626	17 (10)	16 (9)	0.47	Mitochondrial inner membrane protein OS=Homo	0.0739	0.0767	0.0623	0.0709667	0.0181	0.0149	0.0092	0.0140667	-5.04502	down
22172	1.1	EZRI_HUMAN	EZR	436	69370	41 (18)	32 (15)	1.1	Ezrin OS=Homo sapiens GN=EZR PE=1 SV=4	0.1474	0.1726	0.1501	0.1567	0.0218	0.0173	0.0104	0.0165	-9.49697	down
22356	1.1	TKT_HUMAN	TKT	390	67835	39 (20)	27 (18)	1.58	Transketolase OS=Homo sapiens GN=TKT PE	0.2169	0.1695	0.1671	0.1845	0.01	0.0122	0.0106	0.0109333	-16.875	down
22360	1.1	TKT_HUMAN	TKT	461	67835	35 (24)	23 (17)	1.7	Transketolase OS=Homo sapiens GN=TKT PE	0.233	0.209	0.2082	0.216733	0.0073	0.01	0.0064	0.0079	-27.4346	down
22366	1.1	TKT_HUMAN	TKT	402	67835	32 (20)	24 (17)	1.46	Transketolase OS=Homo sapiens GN=TKT PE	0.2488	0.271	0.2591	0.259633	0.0098	0.0134	0.0101	0.0111	-23.3904	down
22478	1.1	TCPZ_HUMAN	CCT6A	198	57988	14 (9)	12 (8)	0.64	T-complex protein 1 subunit zeta OS=Homo	0.1582	0.163	0.1774	0.1662	0.0326	0.03	0.0481	0.0369	-4.50407	down
22505	1.1	KPYM_HUMAN	PKM2	277	57900	14 (7)	13 (7)	0.47	Pyruvate kinase isozymes M1/M2 OS=Homo	0.1517	0.1595	0.1655	0.1589	0.0285	0.0265	0.0154	0.0234667	-6.77131	down
22524	1.1	DPYL3_HUMAN	DPYSL3	519	61924	23 (16)	21 (15)	1.29	Dihydropyrimidinase-related protein 3 OS=Homo	0.1647	0.1574	0.1786	0.1669	0.1042	0.0761	0.0836	0.0879667	-1.89731	down
22524	2.1	TCPA_HUMAN	TCP1	507	60306	21 (16)	18 (14)	1.1	T-complex protein 1 subunit alpha OS=Homo	0.1647	0.1574	0.1786	0.1669	0.1042	0.0761	0.0836	0.0879667	-1.89731	down
22565	1.1	PDIA3_HUMAN	PDIA3	497	56747	24 (18)	21 (18)	1.76	Protein disulfide-isomerase A3 OS=Homo sapiens	0.1181	0.1184	0.1632	0.133233	0.0539	0.0461	0.0687	0.0562333	-2.36929	down
22570	1.1	PDIA3_HUMAN	PDIA3	289	56747	20 (14)	17 (13)	1.08	Protein disulfide-isomerase A3 OS=Homo sapiens	0.1301	0.1006	0.1541	0.128267	0.0416	0.0487	0.0294	0.0399	-3.2147	down
22647	2.1	RBBP4_HUMAN	RBBP4	112	47626	10 (3)	8 (3)	0.22	Histone-binding protein RBBP4 OS=Homo sapiens	0.0678	0.0836	0.0608	0.0707333	0.015	0.026	0.0291	0.0233667	-3.0271	down
22754	1.1	RUVB2_HUMAN	RUVBL2	667	51125	29 (24)	24 (20)	3.2	RuvB-like 2 OS=Homo sapiens GN=RUVBL2 PE	0.1007	0.0865	0.08	0.0890667	0.0362	0.0217	0.0261	0.028	-3.18095	down
23080	1.1	PRDX6_HUMAN	PRDX6	212	25019	24 (12)	18 (11)	3.51	Peroxiredoxin-6 OS=Homo sapiens GN=PRDX6	0.1779	0.1701	0.1867	0.178233	0.0146	0.0115	0.0073	0.0111333	-16.009	down
23231	1.1	LDHB_HUMAN	LDHB	329	36615	23 (14)	15 (10)	1.59	L-lactate dehydrogenase B chain OS=Homo sapiens	0.2045	0.2022	0.2121	0.206267	0.03	0.0258	0.0339	0.0299	-6.89855	down
23283	1.1	LDHB_HUMAN	LDHB	370	36615	24 (15)	18 (12)	2.36	L-lactate dehydrogenase B chain OS=Homo sapiens	0.2399	0.2555	0.2519	0.2491	0.0123	0.0152	0.0197	0.0157333	-15.8326	down
23289	1.1	LDHB_HUMAN	LDHB	385	36615	26 (15)	16 (12)	2.08	L-lactate dehydrogenase B chain OS=Homo sapiens	0.262	0.233	0.2142	0.2364	0.0562	0.0632	0.0726	0.064	-3.69375	down
23318	1.1	LDHA_HUMAN	LDHA	172	36665	14 (7)	13 (6)	0.68	L-lactate dehydrogenase A chain OS=Homo sapiens	0.1004	0.064	0.0868	0.0837333	0.0109	0.0109	0.0061	0.0093	-9.00358	down
23328	1.1	MDHC_HUMAN	MDH1	202	36403	15 (7)	12 (7)	0.84	Malate dehydrogenase, cytoplasmic OS=Homo	0.0655	0.0669	0.0752	0.0692	0.0019	0.0022	0.0029	0.00233333	-29.6571	down
23571	1.1	CLIC4_HUMAN	CLIC4	205	28754	10 (7)	8 (6)	1.15	Chloride intracellular channel protein 4 OS=Homo	0.0983	0.0806	0.0943	0.0910667	0.0105	0.0061	0.006	0.00753333	-12.0885	down
23597	1.1	HNRPF_HUMAN	HNRNPF	320	45643	12 (6)	7 (4)	0.42	Heterogeneous nuclear ribonucleoprotein F OS	0.0909	0.0859	0.0979	0.0915667	0.037	0.0336	0.0284	0.033	-2.77475	down
23666	1.1	TCTP_HUMAN	TPT1	133	19583	11 (5)	7 (4)	1.21	Translationally-controlled tumor protein OS=	0.0838	0.123	0.0977	0.1015	0.0143	0.022	0.0115	0.0159333	-6.37029	down
23705	1.1	TCTP_HUMAN	TPT1	33	19583	9 (1)	7 (1)	0.17	Translationally-controlled tumor protein OS=	0.1665	0.1864	0.1973	0.1834	0.0752	0.0701	0.0847	0.0766667	-2.39217	down
23725	4.1	SERC_HUMAN	PSAT1	169	40397	9 (8)	8 (7)	0.88	Phosphoserine aminotransferase OS=Homo	0.2333	0.2325	0.2396	0.235133	0.1216	0.068	0.0746	0.0880667	-2.66995	down
23981	1.1	NDKB_HUMAN	NME2	124	17287	9 (5)	8 (5)	1.44	Nucleoside diphosphate kinase B OS=Homo	0.1756	0.1737	0.197	0.1821	0.039	0.04	0.0677	0.0489	-3.72393	down
22343	1.1	HNRPM_HUMAN	HNRNPM	170	77464	12 (9)	12 (9)	0.45	Heterogeneous nuclear ribonucleoprotein M	0.0704	0.0666	0.0584	0.0651333	0.1232	0.1177	0.115	0.118633	1.82139	up
22485	1.1	TCPA_HUMAN	TCP1	204	60306	17 (11)	15 (10)	0.79	T-complex protein 1 subunit alpha OS=Homo	0.0704	0.0666	0.0584	0.0651333	0.1232	0.1177	0.115	0.118633	1.82139	up
22485	2.1	PAK2_HUMAN	PAK2	166	58006	18 (12)	17 (11)	0.94	Serine/threonine-protein kinase PAK 2 OS=Homo	0.0704	0.0666	0.0584	0.0651333	0.1232	0.1177	0.115	0.118633	1.82139	up
22485	3.1	P4HA1_HUMAN	P4HA1	129	61011	8 (3)	8 (3)	0.17	Prolyl 4-hydroxylase subunit alpha-1 OS=Homo	0.0365	0.0262	0.0218	0.0281667	0.0851	0.0906	0.0997	0.0918	3.25917	up
22490	1.1	TCPA_HUMAN	TCP1	171	60306	19 (13)	16 (11)	1	T-complex protein 1 subunit alpha OS=Homo	0.0056	0.004	0.0064	0.00533333	0.0645	0.0495	0.0614	0.0584667	10.9625	up
22502	1.1	AINX_HUMAN	INA	228	55357	20 (9)	20 (9)	0.68	Alpha-internexin OS=Homo sapiens GN=INA	0.0363	0.0178	0.0328	0.0289667	0.115	0.1071	0.1098	0.110633	3.81933	up
22530	1.1	TCPG_HUMAN	CCT3	62	60495	4 (2)	4 (2)	0.11	T-complex protein 1 subunit gamma OS=Homo	0.0142	0.0171	0.024	0.0184333	0.1086	0.0907	0.0813	0.0935333	5.07414	up
22576	1.1	AINX_HUMAN	INA	631	55357	38 (28)	29 (24)	3.24	Alpha-internexin OS=Homo sapiens GN=INA	0.0903	0.0598	0.0857	0.0786	0.2001	0.2272	0.2887	0.238667	3.03647	up
22576	2.1	TCPQ_HUMAN	CCT8	201	59583	10 (7)	10 (7)	0.46	T-complex protein 1 subunit theta OS=Homo	0.0903	0.0598	0.0857	0.0786	0.2001	0.2272	0.2887	0.238667	3.03647	up
22576	3.1	UBP14_HUMAN	USP14	102	56033	3 (3)	3 (3)	0.19	Ubiquitin carboxyl-terminal hydrolase 14 OS=	0.0903	0.0598	0.0857	0.0786	0.2001	0.2272	0.2887	0.238667	3.03647	up
22686	1.1	FKBP4_HUMAN	FKBP4	204	51772	25 (11)	22 (10)	0.97	Peptidyl-prolyl cis-trans isomerase FKBP4 OS	0.0903	0.0598	0.0857	0.0786	0.2001	0.2272	0.2887	0.238667	3.03647	up
22686	2.1	HMCS1_HUMAN	HMGCS1	140	57257	10 (6)	7 (6)	0.4	Hydroxymethylglutaryl-CoA synthase, cytoplasmic	0.0104	0.0126	0.0172	0.0134	0.133	0.1076	0.1654	0.135333	10.0995	up
22993	1.1	SEPT2_HUMAN	SEP2	406	41461	21 (12)	15 (9)	1.32	Septin-2 OS=Homo sapiens GN=SEPT2 PE=1	0.0731	0.0694	0.0512	0.0645667	0.1595	0.1461	0.1249	0.1435	2.22251	up
23534	2.1	PA1B2_HUMAN	PAFAH1B2	72	25553	8 (5)	4 (3)	0.64	Platelet-activating factor acetylhydrolase IB subunit	0.0138	0.0123	0.0212	0.0157667	0.0564	0.0494	0.0627	0.0561667	3.56237	up
23782	1.1	TAGL3_HUMAN	TAGLN3	176	22458	15 (9)	11 (8)	2.05	Transgelin-3 OS=Homo sapiens GN=TAGLN3	0.0341	0.0419	0.0449	0.0403	0.1009	0.0928	0.1177	0.1038	2.57568	up
23795	1.1	PEBP1_HUMAN	PEBP1	398	21044	13 (10)	7 (5)	2.26	Phosphatidylethanolamine-binding protein	0.1194	0.117	0.105	0.1138	0.2284	0.2537	0.2454	0.2425	2.13093	up
23910	1.1	COF1_HUMAN	CFL1	322	18491	17 (9)	8 (6)	2.22	Cofilin-1 OS=Homo sapiens GN=CFL1 PE=1 SV	0.203	0.1816	0.1175	0.167367	0.4739	0.4428	0.3652	0.4273	2.55308	up
22671	1.1	RUVB1_HUMAN	RUVBL1	510	50196	28 (19)	22 (17)	2.14	RuvB-like 1 OS=Homo sapiens GN=RUVBL1 PE	0.0262	0.031	0.0336	0.0302667	0.1341	0.1178	0.0819	0.111267	3.67621	up
22671	2.1	DC1L2_HUMAN	DYNC1LI2	156	54066	6 (5)	6 (5)	0.34	Cytoplasmic dynein 1 light intermediate chain	0.0262	0.031	0.0336	0.0302667	0.1341	0.1178	0.0819	0.111267	3.67621	up
22822	3.1	GDIB_HUMAN	GDI2	138	50631	16 (8)	14 (8)	0.66	Rab GDP dissociation inhibitor beta OS=Homo	0.0131	0.0113	0.0069	0.0104333	0.103	0.0945	0.09	0.0958333	9.1853	up
22823	1.1	ENOG_HUMAN	ENO2	340	47239	23 (11)	16 (8)	0.96	Gamma-enolase OS=Homo sapiens GN=ENO2	0.051	0.0744	0.0465	0.0573	0.133	0.1457	0.1431	0.1406	2.45375	up
23298	4.1	DESP_HUMAN	DSP	213	331569	12 (6)	12 (6)	0.06	Desmoplakin OS=Homo sapiens GN=DSP PE	0.0926	0.1434	0.1049	0.113633	0.3491	0.3244	0.3758	0.349767	3.07803	up
23320	1.1	MDHC_HUMAN	MDH1	285	36403	21 (12)	15 (9)	1.39	Malate dehydrogenase, cytoplasmic OS=Homo	0.1277	0.085	0.0793	0.0973333	0.2008	0.2058	0.1781	0.1949	2.0024	up
23325	1.1	LDHA_HUMAN	LDHA	303	36665	16 (11)	14 (9)	1.38	L-lactate dehydrogenase A chain OS=Homo sapiens	0.0071	0.0124	0.0114	0.0103	0.1986	0.2117	0.1537	0.188	18.2524	up
23525	1.1	PSME1_HUMAN	PSME1	199	28705	18 (10)	13 (8)	1.68	Proteasome activator complex subunit 1 OS=	0.0169	0.0154	0.0098	0.0140333	0.0679	0.0589	0.0648	0.0638667	4.55107	up
23598	1.1	PGAM1_HUMAN	PGAM1	418	28786	17 (14)	12 (11)	3.64	Phosphoglycerate mutase 1 OS=Homo sapiens	0.0737	0.0655	0.0544	0.0645333	0.1861	0.232	0.2281	0.2154	3.33781	up
23682	1.1	HCD2_HUMAN	HSD17B10	144	26906	8 (8)	7 (7)	1.55	3-hydroxyacyl-CoA dehydrogenase type-2 OS	0.2077	0.1885	0.1682	0.188133	0.3826	0.4171	0.4382	0.412633	2.1933	up
23694	4.1	RANG_HUMAN	RANBP1	114	23296	7 (5)	6 (5)	0.96	Ran-specific GTPase-activating protein OS=Homo	0.0258	0.0199	0.0158	0.0205	0.1176	0.1454	0.1359	0.132967	6.48618	up
23794	1.1	PRDX2_HUMAN	PRDX2	485	21878	30 (18)	12 (10)	5.39	Peroxiredoxin-2 OS=Homo sapiens GN=PRDX2	0.1454	0.1401	0.1297	0.1384	0.3137	0.2442	0.3242	0.294033	2.12452	up
22872	1.1	PRS7_HUMAN	PSMC2	359	48603	29 (19)	23 (16)	2.05	26S protease regulatory subunit 7 OS=Homo	0.0321	0.0334	0.0235	0.0296667	0.1017	0.0813	0.072	0.085	2.86517	up
23968	4.1	PPIA_HUMAN	PPIA	123	18001	10 (8)	8 (6)	2.96	Peptidyl-prolyl cis-trans isomerase A OS=Homo	0.0349	0.0192	0.0323	0.0288	0.2073	0.2064	0.208	0.207233	7.1956	up
24037	1.1	PA1B3_HUMAN	PAFAH1B3	99	25718	8 (3)	6 (3)	0.44	Platelet-activating factor acetylhydrolase IB subunit	0.0526	0.0357	0.0339	0.0407333	0.4888	0.4093	0.6277	0.5086	12.4861	up
24044	1.1	RABP2_HUMAN	CRABP2	151	15683	17 (7)	10 (6)	2.95	Cellular retinoic acid-binding protein 2 OS=Homo	0.0732	0.0552	0.0445	0.0576333	0.2309	0.162	0.2388	0.210567	3.65356	Up
23643	3.1	PA1B3_HUMAN	PAFAH1B3	123	25718	13 (4)	8 (3)	0.44	Platelet-activating factor acetylhydrolase IB subunit	0.0247	0.0208	0.0138	0.0197667	0.1062	0.1205	0.0998	0.108833	5.5059	Up
