# Supplementary material for: Identification of Thalidomide-Specific Transcriptomics and Proteomics Signatures during Differentiation of Human Embryonic Stem Cells
Source: PLoS One. 2012 Aug 28;7(8):e44228. doi: 10.1371/journal.pone.0044228 (PMC3429450; doi:10.1371/journal.pone.0044228)
Supplement: Table S6 — GO analysis for thalidomide treatment (1, 10 and 70 µM). The DEG obtained from Table S3F. 6A) 1 µM up-regulated genes. 6B) 1 µM down-regulated genes. 6C) 10 µM up-regulated genes. 6D) 10 µM down-regulated genes. 6E) 70 µM up-regulated genes. 6F) 70 µM down-regulated genes. (XLS) [file pone.0044228.s010.xls]

## Sheet: Table S6A_T_1uM_Up
Category	Term	Count	%	PValue	Genes	List Total	Pop Hits	Pop Total	Fold Enrichment	Bonferroni	Benjamini	FDR
GOTERM_BP_FAT	GO:0007155~cell adhesion	3	12	0.18035	IGFBP7, COL12A1, CHL1	16	700	13528	3.62357	1	0.999952	91.7316
GOTERM_BP_FAT	GO:0022610~biological adhesion	3	12	0.180753	IGFBP7, COL12A1, CHL1	16	701	13528	3.6184	1	0.999656	91.7824
GOTERM_BP_FAT	GO:0030001~metal ion transport	3	12	0.092193	SLC17A8, SLC39A12, SCN2A	16	465	13528	5.45484	1	1	70.2496
GOTERM_BP_FAT	GO:0006812~cation transport	3	12	0.123391	SLC17A8, SLC39A12, SCN2A	16	553	13528	4.5868	1	0.999998	80.8076
GOTERM_BP_FAT	GO:0055085~transmembrane transport	3	12	0.129332	SLC17A8, SLC39A12, SCN2A	16	569	13528	4.45782	1	0.999902	82.3756
GOTERM_BP_FAT	GO:0006811~ion transport	3	12	0.208087	SLC17A8, SLC39A12, SCN2A	16	768	13528	3.30273	1	0.999581	94.6294
GOTERM_CC_FAT	GO:0005576~extracellular region	7	28	0.0511141	SPOCK3, SPARCL1, IGFBP7, COL12A1, EPYC, ABO, CHL1	19	2010	12782	2.34286	0.991103	0.692875	43.4911
GOTERM_CC_FAT	GO:0016021~integral to membrane	8	32	0.672321	SLC17A8, GPR85, SLC39A12, MGAT4C, SCN2A, HTR2C, ABO, CHL1	19	5297	12782	1.01603	1	0.999986	99.9995
GOTERM_CC_FAT	GO:0031224~intrinsic to membrane	8	32	0.716888	SLC17A8, GPR85, SLC39A12, MGAT4C, SCN2A, HTR2C, ABO, CHL1	19	5485	12782	0.981202	1	0.999988	99.9999
GOTERM_CC_FAT	GO:0005886~plasma membrane	5	20	0.825306	SLC17A8, GPR85, SCN2A, HTR2C, CHL1	19	3777	12782	0.89057	1	0.999999	100
GOTERM_CC_FAT	GO:0005624~membrane fraction	3	12	0.316909	SLC17A8, SCN2A, HSPA13	19	809	12782	2.4947	1	0.99671	98.4175
GOTERM_CC_FAT	GO:0005626~insoluble fraction	3	12	0.33286	SLC17A8, SCN2A, HSPA13	19	839	12782	2.4055	1	0.994505	98.7762
GOTERM_CC_FAT	GO:0000267~cell fraction	3	12	0.458348	SLC17A8, SCN2A, HSPA13	19	1083	12782	1.86354	1	0.99899	99.8732
GOTERM_MF_FAT	GO:0046872~metal ion binding	7	28	0.403589	SLC17A8, SPOCK3, SPARCL1, SLC39A12, MGAT4C, SCN2A, ABO	17	4140	12983	1.29129	1	1	99.5776
GOTERM_MF_FAT	GO:0043169~cation binding	7	28	0.413836	SLC17A8, SPOCK3, SPARCL1, SLC39A12, MGAT4C, SCN2A, ABO	17	4179	12983	1.27924	1	1	99.6483
GOTERM_MF_FAT	GO:0043167~ion binding	7	28	0.430173	SLC17A8, SPOCK3, SPARCL1, SLC39A12, MGAT4C, SCN2A, ABO	17	4241	12983	1.26054	1	1	99.7392
SP_PIR_KEYWORDS	Secreted	7	28	0.0153721	SPOCK3, SPARCL1, IGFBP7, COL12A1, EPYC, ABO, CHL1	25	1689	19235	3.18875	0.744172	0.365182	15.4475
SP_PIR_KEYWORDS	disulfide bond	8	32	0.0606532	GPR85, SPOCK3, SPARCL1, IGFBP7, COL12A1, EPYC, HTR2C, CHL1	25	2924	19235	2.10506	0.995939	0.667542	49.2236
SP_PIR_KEYWORDS	cell adhesion	3	12	0.0965953	IGFBP7, COL12A1, CHL1	25	422	19235	5.46967	0.999869	0.774607	66.7237
SP_PIR_KEYWORDS	signal	7	28	0.208457	SPOCK3, SPARCL1, IGFBP7, COL12A1, HSPA13, EPYC, CHL1	25	3250	19235	1.65717	1	0.923577	92.0509
SP_PIR_KEYWORDS	disulfide bond	8	32	0.0606532	GPR85, SPOCK3, SPARCL1, IGFBP7, COL12A1, EPYC, HTR2C, CHL1	25	2924	19235	2.10506	0.995939	0.667542	49.2236
SP_PIR_KEYWORDS	ion transport	3	12	0.161593	SLC17A8, SLC39A12, SCN2A	25	578	19235	3.99343	1	0.890926	85.1783
SP_PIR_KEYWORDS	transmembrane	8	32	0.430707	SLC17A8, GPR85, SLC39A12, MGAT4C, SCN2A, HTR2C, ABO, CHL1	25	4973	19235	1.23772	1	0.99297	99.7762
SP_PIR_KEYWORDS	transport	3	12	0.629098	SLC17A8, SLC39A12, SCN2A	25	1670	19235	1.38216	1	0.999306	99.9978
SP_PIR_KEYWORDS	membrane	8	32	0.708841	SLC17A8, GPR85, SLC39A12, MGAT4C, SCN2A, HTR2C, ABO, CHL1	25	6256	19235	0.983887	1	0.999764	99.9998
SP_PIR_KEYWORDS	cell membrane	3	12	0.776628	GPR85, HTR2C, CHL1	25	2194	19235	1.05205	1	0.999848	100
UP_SEQ_FEATURE	disulfide bond	7	28	0.131178	GPR85, SPOCK3, SPARCL1, IGFBP7, EPYC, HTR2C, CHL1	25	2819	19113	1.89842	1	0.986753	80.2377
UP_SEQ_FEATURE	signal peptide	7	28	0.212763	SPOCK3, SPARCL1, IGFBP7, COL12A1, HSPA13, EPYC, CHL1	25	3250	19113	1.64666	1	0.997219	93.6608
UP_SEQ_FEATURE	glycosylation site:N-linked (GlcNAc...)	11	44	0.0213483	SLC17A8, GPR85, SPARCL1, IGFBP7, MGAT4C, SCN2A, COL12A1, EPYC, HTR2C, ABO, CHL1	25	4129	19113	2.03674	0.92965	0.734765	22.0284
UP_SEQ_FEATURE	topological domain:Cytoplasmic	7	28	0.239404	SLC17A8, GPR85, SLC39A12, MGAT4C, HTR2C, ABO, CHL1	25	3374	19113	1.58614	1	0.996339	95.7378
UP_SEQ_FEATURE	transmembrane region	8	32	0.42357	SLC17A8, GPR85, SLC39A12, MGAT4C, SCN2A, HTR2C, ABO, CHL1	25	4911	19113	1.2454	1	0.999937	99.8257
UP_SEQ_FEATURE	topological domain:Extracellular	4	16	0.683959	GPR85, SLC39A12, HTR2C, CHL1	25	2719	19113	1.12471	1	1	99.9998

## Sheet: Table S6B_T_1uM_down
Category	Term	Count	%	PValue	Genes	List Total	Pop Hits	Pop Total	Fold Enrichment	Bonferroni	Benjamini	FDR
GOTERM_BP_FAT	GO:0010038~response to metal ion	6	5.88235	0.00159696	FGG, APOB, FGA, FGB, SERPINA1, ATP7B	90	129	13528	6.99121	0.890863	0.0263356	2.59585
GOTERM_BP_FAT	GO:0007155~cell adhesion	18	17.6471	2.57536e-06	COL18A1, HAPLN1, F11R, COL21A1, NPNT, CD99, CDH1, NID1, NID2, COL5A1, APOA4, DSG2, PKP2, COL6A3, RAC1, COL6A1, PERP, FN1	90	700	13528	3.86514	0.00356309	0.00016996	0.00423805
GOTERM_BP_FAT	GO:0022610~biological adhesion	18	17.6471	2.62561e-06	COL18A1, HAPLN1, F11R, COL21A1, NPNT, CD99, CDH1, NID1, NID2, COL5A1, APOA4, DSG2, PKP2, COL6A3, RAC1, COL6A1, PERP, FN1	90	701	13528	3.85963	0.00363249	0.0001654	0.00432075
GOTERM_BP_FAT	GO:0030198~extracellular matrix organization	7	6.86275	6.19149e-05	COL18A1, LGALS3, NID1, DCN, COL1A1, COL5A1, SMARCA4	90	104	13528	10.1171	0.0822375	0.00178625	0.101841
GOTERM_BP_FAT	GO:0065005~protein-lipid complex assembly	7	6.86275	6.11782e-11	APOA4, APOA2, APOB, APOA1, APOE, APOC3, APOC1	90	12	13528	87.6815	8.47929e-08	8.47929e-08	1.00678e-07
GOTERM_BP_FAT	GO:0034377~plasma lipoprotein particle assembly	7	6.86275	6.11782e-11	APOA4, APOA2, APOB, APOA1, APOE, APOC3, APOC1	90	12	13528	87.6815	8.47929e-08	8.47929e-08	1.00678e-07
GOTERM_BP_FAT	GO:0033700~phospholipid efflux	6	5.88235	2.70144e-09	APOA4, APOA2, APOA1, APOE, APOC3, APOC1	90	10	13528	90.1867	3.74419e-06	1.8721e-06	4.44562e-06
GOTERM_BP_FAT	GO:0045834~positive regulation of lipid metabolic process	8	7.84314	1.82463e-08	APOA4, APOA2, APOA1, INS-IGF2, APOE, RAC1, APOC1, FABP1, IGF2	90	46	13528	26.1411	2.52891e-05	6.32233e-06	3.0027e-05
GOTERM_BP_FAT	GO:0034381~lipoprotein particle clearance	6	5.88235	4.53903e-08	APOA2, APOB, APOA1, APOE, APOC3, APOC1	90	16	13528	56.3667	6.29089e-05	1.25821e-05	7.46964e-05
GOTERM_BP_FAT	GO:0019216~regulation of lipid metabolic process	10	9.80392	4.82993e-08	APOA4, APOA2, APOB, APOA1, INS-IGF2, APOE, APOC3, RAC1, APOC1, FABP1, IGF2	90	112	13528	13.4206	6.69406e-05	1.11571e-05	7.94837e-05
GOTERM_BP_FAT	GO:0010873~positive regulation of cholesterol esterification	5	4.90196	6.03462e-08	APOA4, APOA2, APOA1, APOE, APOC1	90	7	13528	107.365	8.36364e-05	1.04549e-05	9.93086e-05
GOTERM_BP_FAT	GO:0033344~cholesterol efflux	6	5.88235	1.18968e-07	APOA4, APOA2, APOA1, APOE, APOC3, APOC1	90	19	13528	47.4667	0.000164876	1.83209e-05	0.000195779
GOTERM_BP_FAT	GO:0010872~regulation of cholesterol esterification	5	4.90196	1.20086e-07	APOA4, APOA2, APOA1, APOE, APOC1	90	8	13528	93.9444	0.000166425	1.66438e-05	0.000197619
GOTERM_BP_FAT	GO:0015918~sterol transport	7	6.86275	1.34922e-07	APOA4, APOA2, APOB, APOA1, APOE, APOC3, APOC1	90	37	13528	28.4372	0.000186984	1.7e-05	0.000222033
GOTERM_BP_FAT	GO:0030301~cholesterol transport	7	6.86275	1.34922e-07	APOA4, APOA2, APOB, APOA1, APOE, APOC3, APOC1	90	37	13528	28.4372	0.000186984	1.7e-05	0.000222033
GOTERM_BP_FAT	GO:0032374~regulation of cholesterol transport	6	5.88235	1.57804e-07	APOA4, APOA2, APOA1, APOE, APOC3, APOC1	90	20	13528	45.0933	0.000218692	1.82262e-05	0.00025969
GOTERM_BP_FAT	GO:0032371~regulation of sterol transport	6	5.88235	1.57804e-07	APOA4, APOA2, APOA1, APOE, APOC3, APOC1	90	20	13528	45.0933	0.000218692	1.82262e-05	0.00025969
GOTERM_BP_FAT	GO:0034367~macromolecular complex remodeling	6	5.88235	1.57804e-07	APOA4, APOA2, APOB, APOE, APOC3, APOC1	90	20	13528	45.0933	0.000218692	1.82262e-05	0.00025969
GOTERM_BP_FAT	GO:0034368~protein-lipid complex remodeling	6	5.88235	1.57804e-07	APOA4, APOA2, APOB, APOE, APOC3, APOC1	90	20	13528	45.0933	0.000218692	1.82262e-05	0.00025969
GOTERM_BP_FAT	GO:0034369~plasma lipoprotein particle remodeling	6	5.88235	1.57804e-07	APOA4, APOA2, APOB, APOE, APOC3, APOC1	90	20	13528	45.0933	0.000218692	1.82262e-05	0.00025969
GOTERM_BP_FAT	GO:0050994~regulation of lipid catabolic process	6	5.88235	6.49031e-07	APOA4, APOA2, INS-IGF2, APOC3, APOC1, FABP1, IGF2	90	26	13528	34.6872	0.000899153	5.99687e-05	0.00106807
GOTERM_BP_FAT	GO:0034375~high-density lipoprotein particle remodeling	5	4.90196	8.32242e-07	APOA4, APOA2, APOE, APOC3, APOC1	90	12	13528	62.6296	0.00115282	7.20904e-05	0.00136957
GOTERM_BP_FAT	GO:0055088~lipid homeostasis	7	6.86275	9.70921e-07	APOA4, APOA2, APOB, APOA1, INS-IGF2, APOE, APOC3, IGF2	90	51	13528	20.6309	0.00134479	7.91555e-05	0.00159778
GOTERM_BP_FAT	GO:0032368~regulation of lipid transport	6	5.88235	1.37723e-06	APOA4, APOA2, APOA1, APOE, APOC3, APOC1	90	30	13528	30.0622	0.00190702	0.000106041	0.00226641
GOTERM_BP_FAT	GO:0045940~positive regulation of steroid metabolic process	5	4.90196	1.66612e-06	APOA4, APOA2, APOA1, APOE, APOC1	90	14	13528	53.6825	0.00230658	0.000121532	0.00274181
GOTERM_BP_FAT	GO:0015914~phospholipid transport	6	5.88235	2.25835e-06	APOA4, APOA2, APOA1, APOE, APOC3, APOC1	90	33	13528	27.3293	0.00312518	0.000156492	0.00371638
GOTERM_BP_FAT	GO:0043691~reverse cholesterol transport	5	4.90196	2.99897e-06	APOA4, APOA2, APOA1, APOE, APOC3	90	16	13528	46.9722	0.00414795	0.000180704	0.00493513
GOTERM_BP_FAT	GO:0019218~regulation of steroid metabolic process	6	5.88235	3.53195e-06	APOA4, APOA2, APOB, APOA1, APOE, APOC1	90	36	13528	25.0519	0.00488334	0.00020395	0.0058122
GOTERM_BP_FAT	GO:0055092~sterol homeostasis	6	5.88235	4.65416e-06	APOA4, APOA2, APOB, APOA1, APOE, APOC3	90	38	13528	23.7333	0.00642992	0.000238886	0.00765883
GOTERM_BP_FAT	GO:0042632~cholesterol homeostasis	6	5.88235	4.65416e-06	APOA4, APOA2, APOB, APOA1, APOE, APOC3	90	38	13528	23.7333	0.00642992	0.000238886	0.00765883
GOTERM_BP_FAT	GO:0006869~lipid transport	9	8.82353	4.87491e-06	APOA4, RBP4, APOA2, APOB, APOA1, APOE, APOC3, APOC1, FABP1	90	145	13528	9.32966	0.00673387	0.00024128	0.00802209
GOTERM_BP_FAT	GO:0006641~triglyceride metabolic process	6	5.88235	8.69758e-06	APOA4, APOA2, APOB, APOE, APOC3, APOC1	90	43	13528	20.9736	0.0119825	0.000401749	0.0143122
GOTERM_BP_FAT	GO:0010876~lipid localization	9	8.82353	8.77094e-06	APOA4, RBP4, APOA2, APOB, APOA1, APOE, APOC3, APOC1, FABP1	90	157	13528	8.61656	0.012083	0.000392071	0.0144329
GOTERM_BP_FAT	GO:0046890~regulation of lipid biosynthetic process	6	5.88235	1.09256e-05	APOA4, APOB, INS-IGF2, APOE, APOC3, APOC1, IGF2	90	45	13528	20.0415	0.0150289	0.000473107	0.0179782
GOTERM_BP_FAT	GO:0042157~lipoprotein metabolic process	7	6.86275	1.39086e-05	APOA4, APOA2, APOB, APOA1, APOE, APOC3, APOC1	90	80	13528	13.1522	0.0190929	0.000583997	0.0228863
GOTERM_BP_FAT	GO:0006639~acylglycerol metabolic process	6	5.88235	1.67033e-05	APOA4, APOA2, APOB, APOE, APOC3, APOC1	90	49	13528	18.4054	0.0228851	0.000661239	0.0274843
GOTERM_BP_FAT	GO:0006638~neutral lipid metabolic process	6	5.88235	1.84636e-05	APOA4, APOA2, APOB, APOE, APOC3, APOC1	90	50	13528	18.0373	0.0252661	0.000710601	0.0303802
GOTERM_BP_FAT	GO:0006662~glycerol ether metabolic process	6	5.88235	2.03649e-05	APOA4, APOA2, APOB, APOE, APOC3, APOC1	90	51	13528	17.6837	0.0278315	0.000762577	0.0335083
GOTERM_BP_FAT	GO:0018904~organic ether metabolic process	6	5.88235	2.46226e-05	APOA4, APOA2, APOB, APOE, APOC3, APOC1	90	53	13528	17.0164	0.0335516	0.000897686	0.0405125
GOTERM_BP_FAT	GO:0048878~chemical homeostasis	14	13.7255	2.83618e-05	RBP4, EPAS1, INS-IGF2, F2RL1, IGF2, FZD2, SLC9A3R1, APOA4, APOA2, APOB, APOA1, APOE, APOC3, SLC40A1, ATP7B	90	512	13528	4.11007	0.0385475	0.00100744	0.0466634
GOTERM_BP_FAT	GO:0051051~negative regulation of transport	8	7.84314	2.94176e-05	APOA2, APOA1, INS-IGF2, FST, APOC3, RAC1, APOC1, IGF2, SRGN	90	135	13528	8.90733	0.0399533	0.00101882	0.0484
GOTERM_BP_FAT	GO:0008203~cholesterol metabolic process	7	6.86275	3.09879e-05	APOA4, APOA2, APOB, APOA1, APOE, APOC3, APOC1	90	92	13528	11.4367	0.0420406	0.00104701	0.0509829
GOTERM_BP_FAT	GO:0045833~negative regulation of lipid metabolic process	5	4.90196	3.17632e-05	APOA2, INS-IGF2, APOE, APOC3, APOC1, IGF2	90	28	13528	26.8413	0.0430694	0.00104765	0.0522582
GOTERM_BP_FAT	GO:0009894~regulation of catabolic process	7	6.86275	3.94494e-05	APOA4, APOA2, INS-IGF2, APOE, APOC3, APOC1, FABP1, IGF2	90	96	13528	10.9602	0.05321	0.00127077	0.0649001
GOTERM_BP_FAT	GO:0031329~regulation of cellular catabolic process	6	5.88235	4.89788e-05	APOA4, INS-IGF2, APOE, APOC3, APOC1, FABP1, IGF2	90	61	13528	14.7847	0.0656332	0.00154168	0.0805713
GOTERM_BP_FAT	GO:0016125~sterol metabolic process	7	6.86275	5.25329e-05	APOA4, APOA2, APOB, APOA1, APOE, APOC3, APOC1	90	101	13528	10.4176	0.0702249	0.00161675	0.0864156
GOTERM_BP_FAT	GO:0050995~negative regulation of lipid catabolic process	4	3.92157	7.50615e-05	APOA2, INS-IGF2, APOC3, APOC1, IGF2	90	13	13528	46.2496	0.09881	0.0020379	0.123453
GOTERM_BP_FAT	GO:0051241~negative regulation of multicellular organismal process	8	7.84314	0.000101327	RBP4, APOA1, INS-IGF2, APOE, APOC3, APOC1, IGF2, SRGN, AHSG	90	164	13528	7.33225	0.13103	0.00264643	0.166618
GOTERM_BP_FAT	GO:0042592~homeostatic process	16	15.6863	0.000103923	RBP4, EPAS1, INS-IGF2, F2RL1, IGF2, FZD2, SLC9A3R1, APOA4, APOA2, APOB, APOA1, APOE, APOC3, RAC1, TGFBR3, SLC40A1, ATP7B	90	751	13528	3.20237	0.134151	0.00266394	0.170883
GOTERM_BP_FAT	GO:0010903~negative regulation of very-low-density lipoprotein particle remodeling	3	2.94118	0.000127848	APOA2, APOA1, APOC3	90	3	13528	150.311	0.162395	0.00315943	0.210184
GOTERM_BP_FAT	GO:0032488~Cdc42 protein signal transduction	3	2.94118	0.000254599	APOA1, APOE, APOC3	90	4	13528	112.733	0.297366	0.00586473	0.418157
GOTERM_BP_FAT	GO:0009896~positive regulation of catabolic process	5	4.90196	0.000295835	APOA4, APOA2, INS-IGF2, APOE, FABP1, IGF2	90	49	13528	15.3379	0.336408	0.0064882	0.485729
GOTERM_BP_FAT	GO:0019217~regulation of fatty acid metabolic process	5	4.90196	0.000295835	APOA4, INS-IGF2, APOC3, APOC1, FABP1, IGF2	90	49	13528	15.3379	0.336408	0.0064882	0.485729
GOTERM_BP_FAT	GO:0008202~steroid metabolic process	8	7.84314	0.000365281	APOA4, AFP, APOA2, APOB, APOA1, APOE, APOC3, APOC1	90	202	13528	5.95292	0.397322	0.00788084	0.59943
GOTERM_BP_FAT	GO:0065003~macromolecular complex assembly	14	13.7255	0.000388494	APOC1, H1FX, CDH1, SLC9A3R1, APOA4, FGG, APOB, APOA2, APOA1, FGA, FGB, APOE, APOC3, RAC1	90	665	13528	3.16444	0.416411	0.00825127	0.637409
GOTERM_BP_FAT	GO:0010901~regulation of very-low-density lipoprotein particle remodeling	3	2.94118	0.000422514	APOA2, APOA1, APOC3	90	5	13528	90.1867	0.4433	0.00883541	0.693044
GOTERM_BP_FAT	GO:0034380~high-density lipoprotein particle assembly	3	2.94118	0.000422514	APOA2, APOA1, APOE	90	5	13528	90.1867	0.4433	0.00883541	0.693044
GOTERM_BP_FAT	GO:0034382~chylomicron remnant clearance	3	2.94118	0.000422514	APOE, APOC3, APOC1	90	5	13528	90.1867	0.4433	0.00883541	0.693044
GOTERM_BP_FAT	GO:0048514~blood vessel morphogenesis	8	7.84314	0.000474721	COL18A1, TDGF3, APOB, HAND1, EPAS1, APOE, TDGF1, FIGF, SMARCA4	90	211	13528	5.699	0.482176	0.00963154	0.778364
GOTERM_BP_FAT	GO:0010565~regulation of cellular ketone metabolic process	5	4.90196	0.000529902	APOA4, INS-IGF2, APOC3, APOC1, FABP1, IGF2	90	57	13528	13.1852	0.520321	0.0105905	0.86847
GOTERM_BP_FAT	GO:0045922~negative regulation of fatty acid metabolic process	3	2.94118	0.000631058	INS-IGF2, APOC3, APOC1, IGF2	90	6	13528	75.1556	0.583106	0.0120782	1.03345
GOTERM_BP_FAT	GO:0030300~regulation of intestinal cholesterol absorption	3	2.94118	0.000631058	APOA4, APOA2, APOA1	90	6	13528	75.1556	0.583106	0.0120782	1.03345
GOTERM_BP_FAT	GO:0034379~very-low-density lipoprotein particle assembly	3	2.94118	0.000631058	APOB, APOC3, APOC1	90	6	13528	75.1556	0.583106	0.0120782	1.03345
GOTERM_BP_FAT	GO:0034384~high-density lipoprotein particle clearance	3	2.94118	0.000631058	APOA2, APOA1, APOE	90	6	13528	75.1556	0.583106	0.0120782	1.03345
GOTERM_BP_FAT	GO:0046486~glycerolipid metabolic process	7	6.86275	0.000688383	APOA4, APOA2, APOB, APOA1, APOE, APOC3, APOC1	90	162	13528	6.49492	0.614967	0.0128148	1.12683
GOTERM_BP_FAT	GO:0043933~macromolecular complex subunit organization	14	13.7255	0.000720568	APOC1, H1FX, CDH1, SLC9A3R1, APOA4, FGG, APOB, APOA2, APOA1, FGA, FGB, APOE, APOC3, RAC1	90	710	13528	2.96388	0.631777	0.0132326	1.17922
GOTERM_BP_FAT	GO:0060192~negative regulation of lipase activity	3	2.94118	0.0008797	APOA2, APOC3, APOC1	90	7	13528	64.419	0.704711	0.0159219	1.43788
GOTERM_BP_FAT	GO:0032372~negative regulation of sterol transport	3	2.94118	0.0008797	APOA2, APOC3, APOC1	90	7	13528	64.419	0.704711	0.0159219	1.43788
GOTERM_BP_FAT	GO:0032375~negative regulation of cholesterol transport	3	2.94118	0.0008797	APOA2, APOC3, APOC1	90	7	13528	64.419	0.704711	0.0159219	1.43788
GOTERM_BP_FAT	GO:0044269~glycerol ether catabolic process	3	2.94118	0.00149519	APOA2, APOB, APOC3	90	9	13528	50.1037	0.874303	0.0249741	2.43232
GOTERM_BP_FAT	GO:0046461~neutral lipid catabolic process	3	2.94118	0.00149519	APOA2, APOB, APOC3	90	9	13528	50.1037	0.874303	0.0249741	2.43232
GOTERM_BP_FAT	GO:0046464~acylglycerol catabolic process	3	2.94118	0.00149519	APOA2, APOB, APOC3	90	9	13528	50.1037	0.874303	0.0249741	2.43232
GOTERM_BP_FAT	GO:0034370~triglyceride-rich lipoprotein particle remodeling	3	2.94118	0.00149519	APOA4, APOA2, APOE	90	9	13528	50.1037	0.874303	0.0249741	2.43232
GOTERM_BP_FAT	GO:0031331~positive regulation of cellular catabolic process	4	3.92157	0.00167983	APOA4, INS-IGF2, APOE, FABP1, IGF2	90	36	13528	16.7012	0.902724	0.0273593	2.72881
GOTERM_BP_FAT	GO:0009895~negative regulation of catabolic process	4	3.92157	0.00181941	APOA2, INS-IGF2, APOC3, APOC1, IGF2	90	37	13528	16.2498	0.919862	0.0292576	2.95238
GOTERM_BP_FAT	GO:0044058~regulation of digestive system process	3	2.94118	0.00226483	APOA4, APOA2, APOA1	90	11	13528	40.9939	0.95683	0.0339448	3.66259
GOTERM_BP_FAT	GO:0051129~negative regulation of cellular component organization	6	5.88235	0.00243229	APOA2, APOA1, APOC3, RAC1, APOC1, TGFBR3	90	142	13528	6.35117	0.965791	0.0356424	3.92833
GOTERM_BP_FAT	GO:0046503~glycerolipid catabolic process	3	2.94118	0.0027062	APOA2, APOB, APOC3	90	12	13528	37.5778	0.97662	0.0391684	4.36151
GOTERM_BP_FAT	GO:0050996~positive regulation of lipid catabolic process	3	2.94118	0.00318459	APOA4, APOA2, FABP1	90	13	13528	34.6872	0.987976	0.0450066	5.11369
GOTERM_BP_FAT	GO:0051346~negative regulation of hydrolase activity	4	3.92157	0.00384467	APOA2, APOA1, APOC3, APOC1	90	48	13528	12.5259	0.995199	0.0530219	6.14242
GOTERM_BP_FAT	GO:0051055~negative regulation of lipid biosynthetic process	3	2.94118	0.00425046	APOE, APOC3, APOC1	90	15	13528	30.0622	0.997271	0.0567769	6.76964
GOTERM_BP_FAT	GO:0032369~negative regulation of lipid transport	3	2.94118	0.00425046	APOA2, APOC3, APOC1	90	15	13528	30.0622	0.997271	0.0567769	6.76964
GOTERM_BP_FAT	GO:0042304~regulation of fatty acid biosynthetic process	3	2.94118	0.00425046	APOA4, APOC3, APOC1	90	15	13528	30.0622	0.997271	0.0567769	6.76964
GOTERM_BP_FAT	GO:0051004~regulation of lipoprotein lipase activity	3	2.94118	0.00545856	APOA4, APOC3, APOC1	90	17	13528	26.5255	0.999493	0.069702	8.61371
GOTERM_BP_FAT	GO:0016042~lipid catabolic process	6	5.88235	0.00564414	APOA4, APOA2, APOB, APOE, APOC3, HADHA	90	173	13528	5.2131	0.999608	0.0713365	8.89393
GOTERM_BP_FAT	GO:0031330~negative regulation of cellular catabolic process	3	2.94118	0.007529	INS-IGF2, APOC3, APOC1, IGF2	90	20	13528	22.5467	0.999972	0.0892838	11.6947
GOTERM_BP_FAT	GO:0046470~phosphatidylcholine metabolic process	3	2.94118	0.00828616	APOA4, APOA2, APOA1	90	21	13528	21.473	0.99999	0.0962133	12.7968
GOTERM_BP_FAT	GO:0043086~negative regulation of catalytic activity	7	6.86275	0.00983204	APOA2, APOA1, INS-IGF2, APOE, RGS4, APOC3, APOC1, IGF2	90	277	13528	3.79848	0.999999	0.109575	15.007
GOTERM_BP_FAT	GO:0042060~wound healing	13	12.7451	4.0812e-09	INS-IGF2, F2RL1, IGF2, COL5A1, FGG, ANXA8, THBD, FGA, FGB, TFPI, DSP, SERPINA1, ANXA8L2, FN1	90	191	13528	10.2306	5.65652e-06	1.88551e-06	6.71622e-06
GOTERM_BP_FAT	GO:0009611~response to wounding	18	17.6471	5.17041e-08	F11R, INS-IGF2, F2RL1, IGF2, MDK, COL5A1, AHSG, FGG, APOA2, ANXA8, THBD, FGA, FGB, RAC1, TFPI, DSP, SERPINA1, ANXA8L2, FN1	90	530	13528	5.10491	7.16593e-05	1.02374e-05	8.50867e-05
GOTERM_BP_FAT	GO:0050817~coagulation	9	8.82353	3.37739e-07	FGG, ANXA8, THBD, FGA, FGB, F2RL1, TFPI, ANXA8L2, SERPINA1	90	102	13528	13.2627	0.000467997	3.60076e-05	0.000555799
GOTERM_BP_FAT	GO:0007596~blood coagulation	9	8.82353	3.37739e-07	FGG, ANXA8, THBD, FGA, FGB, F2RL1, TFPI, ANXA8L2, SERPINA1	90	102	13528	13.2627	0.000467997	3.60076e-05	0.000555799
GOTERM_BP_FAT	GO:0007599~hemostasis	9	8.82353	5.25072e-07	FGG, ANXA8, THBD, FGA, FGB, F2RL1, TFPI, ANXA8L2, SERPINA1	90	108	13528	12.5259	0.000727485	5.19808e-05	0.00086408
GOTERM_BP_FAT	GO:0050878~regulation of body fluid levels	9	8.82353	3.95894e-06	FGG, ANXA8, THBD, FGA, FGB, F2RL1, TFPI, ANXA8L2, SERPINA1	90	141	13528	9.59433	0.00547208	0.00021946	0.00651483
GOTERM_BP_FAT	GO:0010035~response to inorganic substance	9	8.82353	5.9892e-05	APOA4, FGG, APOB, FGA, FGB, APOE, SERPINA1, COL1A1, ATP7B	90	205	13528	6.59902	0.0796606	0.001803	0.0985155
GOTERM_BP_FAT	GO:0010038~response to metal ion	6	5.88235	0.00159696	FGG, APOB, FGA, FGB, SERPINA1, ATP7B	90	129	13528	6.99121	0.890863	0.0263356	2.59585
GOTERM_BP_FAT	GO:0051258~protein polymerization	4	3.92157	0.00407611	FGG, FGA, FGB, RAC1	90	49	13528	12.2703	0.996521	0.0550378	6.50063
GOTERM_BP_FAT	GO:0051051~negative regulation of transport	8	7.84314	2.94176e-05	APOA2, APOA1, INS-IGF2, FST, APOC3, RAC1, APOC1, IGF2, SRGN	90	135	13528	8.90733	0.0399533	0.00101882	0.0484
GOTERM_BP_FAT	GO:0048261~negative regulation of receptor-mediated endocytosis	3	2.94118	0.000422514	APOC3, RAC1, APOC1	90	5	13528	90.1867	0.4433	0.00883541	0.693044
GOTERM_BP_FAT	GO:0051129~negative regulation of cellular component organization	6	5.88235	0.00243229	APOA2, APOA1, APOC3, RAC1, APOC1, TGFBR3	90	142	13528	6.35117	0.965791	0.0356424	3.92833
GOTERM_BP_FAT	GO:0045806~negative regulation of endocytosis	3	2.94118	0.00425046	APOC3, RAC1, APOC1	90	15	13528	30.0622	0.997271	0.0567769	6.76964
GOTERM_BP_FAT	GO:0048259~regulation of receptor-mediated endocytosis	3	2.94118	0.00483697	APOC3, RAC1, APOC1	90	16	13528	28.1833	0.998794	0.0637618	7.66922
GOTERM_BP_FAT	GO:0030100~regulation of endocytosis	4	3.92157	0.00752454	APOC3, RAC1, APOC1, AHSG	90	61	13528	9.85647	0.999972	0.0899997	11.6881
GOTERM_BP_FAT	GO:0010033~response to organic substance	16	15.6863	6.57336e-05	RBP4, INS-IGF2, CDH1, IGF2, AQP1, AHSG, AFP, APOA2, APOB, KRT19, THBD, APOE, REN, TGFBR3, SERPINA1, COL1A1, ATP7B	90	721	13528	3.33561	0.0870826	0.00185766	0.10812
GOTERM_BP_FAT	GO:0009725~response to hormone stimulus	10	9.80392	0.000677926	RBP4, APOA2, KRT19, INS-IGF2, REN, TGFBR3, IGF2, SERPINA1, COL1A1, AQP1, AHSG	90	367	13528	4.09567	0.609343	0.0127931	1.1098
GOTERM_BP_FAT	GO:0009719~response to endogenous stimulus	10	9.80392	0.00135574	RBP4, APOA2, KRT19, INS-IGF2, REN, TGFBR3, IGF2, SERPINA1, COL1A1, AQP1, AHSG	90	405	13528	3.71139	0.847461	0.0229466	2.20785
GOTERM_BP_FAT	GO:0055088~lipid homeostasis	7	6.86275	9.70921e-07	APOA4, APOA2, APOB, APOA1, INS-IGF2, APOE, APOC3, IGF2	90	51	13528	20.6309	0.00134479	7.91555e-05	0.00159778
GOTERM_BP_FAT	GO:0051051~negative regulation of transport	8	7.84314	2.94176e-05	APOA2, APOA1, INS-IGF2, FST, APOC3, RAC1, APOC1, IGF2, SRGN	90	135	13528	8.90733	0.0399533	0.00101882	0.0484
GOTERM_BP_FAT	GO:0050709~negative regulation of protein secretion	4	3.92157	0.000144887	APOA2, APOA1, INS-IGF2, IGF2, SRGN	90	16	13528	37.5778	0.181947	0.00351709	0.238166
GOTERM_BP_FAT	GO:0051048~negative regulation of secretion	5	4.90196	0.00046212	APOA2, APOA1, INS-IGF2, FST, IGF2, SRGN	90	55	13528	13.6646	0.473048	0.00951632	0.757777
GOTERM_BP_FAT	GO:0050708~regulation of protein secretion	5	4.90196	0.000566316	RBP4, APOA2, APOA1, INS-IGF2, IGF2, SRGN	90	58	13528	12.9579	0.543942	0.0109973	0.927889
GOTERM_BP_FAT	GO:0051223~regulation of protein transport	6	5.88235	0.000919927	RBP4, APOA2, APOA1, INS-IGF2, CDH1, IGF2, SRGN	90	114	13528	7.91111	0.720738	0.0164298	1.50316
GOTERM_BP_FAT	GO:0050707~regulation of cytokine secretion	4	3.92157	0.00098277	APOA2, APOA1, INS-IGF2, IGF2, SRGN	90	30	13528	20.0415	0.744054	0.0173199	1.60507
GOTERM_BP_FAT	GO:0070201~regulation of establishment of protein localization	6	5.88235	0.00120174	RBP4, APOA2, APOA1, INS-IGF2, CDH1, IGF2, SRGN	90	121	13528	7.45344	0.811115	0.0208755	1.95939
GOTERM_BP_FAT	GO:0050710~negative regulation of cytokine secretion	3	2.94118	0.001861	APOA2, APOA1, SRGN	90	10	13528	45.0933	0.924358	0.0295741	3.01889
GOTERM_BP_FAT	GO:0032880~regulation of protein localization	6	5.88235	0.00214762	RBP4, APOA2, APOA1, INS-IGF2, CDH1, IGF2, SRGN	90	138	13528	6.53527	0.949197	0.0325669	3.47618
GOTERM_BP_FAT	GO:0051224~negative regulation of protein transport	4	3.92157	0.00228085	APOA2, APOA1, INS-IGF2, IGF2, SRGN	90	40	13528	15.0311	0.95778	0.0338158	3.68804
GOTERM_BP_FAT	GO:0060341~regulation of cellular localization	7	6.86275	0.00584808	RBP4, APOA2, APOA1, INS-IGF2, FST, CDH1, IGF2, SRGN	90	248	13528	4.24265	0.999705	0.0731598	9.20095
GOTERM_BP_FAT	GO:0051241~negative regulation of multicellular organismal process	8	7.84314	0.000101327	RBP4, APOA1, INS-IGF2, APOE, APOC3, APOC1, IGF2, SRGN, AHSG	90	164	13528	7.33225	0.13103	0.00264643	0.166618
GOTERM_BP_FAT	GO:0051781~positive regulation of cell division	4	3.92157	0.0021198	PPBP, INS-IGF2, IGF2, FIGF, MDK	90	39	13528	15.4165	0.947196	0.0325067	3.43188
GOTERM_BP_FAT	GO:0051302~regulation of cell division	4	3.92157	0.00362144	PPBP, INS-IGF2, IGF2, FIGF, MDK	90	47	13528	12.7924	0.993451	0.0505187	5.7957
GOTERM_BP_FAT	GO:0006953~acute-phase response	4	3.92157	0.00228085	INS-IGF2, IGF2, SERPINA1, AHSG, FN1	90	40	13528	15.0311	0.95778	0.0338158	3.68804
GOTERM_BP_FAT	GO:0002526~acute inflammatory response	5	4.90196	0.0039506	APOA2, INS-IGF2, IGF2, SERPINA1, AHSG, FN1	90	98	13528	7.66893	0.995857	0.0539103	6.30653
GOTERM_BP_FAT	GO:0008544~epidermis development	6	5.88235	0.00728844	RBP2, FST, DSP, COL1A1, COL5A1, SMARCA4	90	184	13528	4.90145	0.99996	0.0880505	11.3418
GOTERM_BP_FAT	GO:0015669~gas transport	4	3.92157	0.000209119	HBG1, HBG2, AQP1, HBE1	90	18	13528	33.4025	0.251639	0.00490099	0.343581
GOTERM_BP_FAT	GO:0015671~oxygen transport	3	2.94118	0.00318459	HBG1, HBG2, HBE1	90	13	13528	34.6872	0.987976	0.0450066	5.11369
GOTERM_BP_FAT	GO:0001501~skeletal system development	8	7.84314	0.00501742	RBP4, LGALS3, INS-IGF2, HOXA9, IGF2, COL1A1, FRZB, IGFBP3, AHSG	90	319	13528	3.76956	0.999062	0.065446	7.94435
GOTERM_BP_FAT	GO:0001568~blood vessel development	11	10.7843	4.58471e-06	COL18A1, TDGF3, APOB, HAND1, EPAS1, APOE, TDGF1, TGFBR3, COL1A1, FIGF, COL5A1, SMARCA4	90	245	13528	6.74866	0.00633428	0.000244371	0.00754456
GOTERM_BP_FAT	GO:0001944~vasculature development	11	10.7843	5.68075e-06	COL18A1, TDGF3, APOB, HAND1, EPAS1, APOE, TDGF1, TGFBR3, COL1A1, FIGF, COL5A1, SMARCA4	90	251	13528	6.58734	0.00784262	0.000271464	0.0093481
GOTERM_BP_FAT	GO:0060343~trabecula formation	4	3.92157	1.50522e-05	RBP4, TGFBR3, COL1A1, SMARCA4	90	8	13528	75.1556	0.0206464	0.000613416	0.0247678
GOTERM_BP_FAT	GO:0043009~chordate embryonic development	11	10.7843	6.15525e-05	TDGF3, RBP4, APOB, HAND1, EPAS1, GATA6, TDGF1, TGFBR3, HOXA9, CDH1, COL1A1, SMARCA4	90	331	13528	4.99523	0.0817764	0.00181355	0.101246
GOTERM_BP_FAT	GO:0009792~embryonic development ending in birth or egg hatching	11	10.7843	6.63736e-05	TDGF3, RBP4, APOB, HAND1, EPAS1, GATA6, TDGF1, TGFBR3, HOXA9, CDH1, COL1A1, SMARCA4	90	334	13528	4.95037	0.0878919	0.00183824	0.109172
GOTERM_BP_FAT	GO:0001701~in utero embryonic development	8	7.84314	0.000157288	TDGF3, APOB, HAND1, EPAS1, GATA6, TDGF1, TGFBR3, CDH1, SMARCA4	90	176	13528	6.83232	0.195889	0.00375187	0.258526
GOTERM_BP_FAT	GO:0048514~blood vessel morphogenesis	8	7.84314	0.000474721	COL18A1, TDGF3, APOB, HAND1, EPAS1, APOE, TDGF1, FIGF, SMARCA4	90	211	13528	5.699	0.482176	0.00963154	0.778364
GOTERM_BP_FAT	GO:0048738~cardiac muscle tissue development	5	4.90196	0.000529902	TDGF3, RBP4, HAND1, GATA6, TDGF1, TGFBR3	90	57	13528	13.1852	0.520321	0.0105905	0.86847
GOTERM_BP_FAT	GO:0007507~heart development	8	7.84314	0.000531087	TDGF3, RBP4, HAND1, PKP2, GATA6, TDGF1, TGFBR3, COL5A1, SMARCA4	90	215	13528	5.59297	0.521109	0.0104632	0.870404
GOTERM_BP_FAT	GO:0060347~heart trabecula formation	3	2.94118	0.000631058	RBP4, TGFBR3, SMARCA4	90	6	13528	75.1556	0.583106	0.0120782	1.03345
GOTERM_BP_FAT	GO:0003007~heart morphogenesis	5	4.90196	0.00134802	RBP4, HAND1, TGFBR3, COL5A1, SMARCA4	90	73	13528	10.2953	0.845817	0.0230992	2.1954
GOTERM_BP_FAT	GO:0001824~blastocyst development	4	3.92157	0.00280883	HAND1, TGFBR3, CDH1, SMARCA4	90	43	13528	13.9824	0.979728	0.0402064	4.52336
GOTERM_BP_FAT	GO:0048729~tissue morphogenesis	6	5.88235	0.00665617	TDGF3, HAND1, FST, TDGF1, TGFBR3, COL1A1, SMARCA4	90	180	13528	5.01037	0.999904	0.0814144	10.4079
GOTERM_BP_FAT	GO:0014706~striated muscle tissue development	5	4.90196	0.00782632	TDGF3, RBP4, HAND1, GATA6, TDGF1, TGFBR3	90	119	13528	6.31559	0.999981	0.0918732	12.129
GOTERM_BP_FAT	GO:0060537~muscle tissue development	5	4.90196	0.00927265	TDGF3, RBP4, HAND1, GATA6, TDGF1, TGFBR3	90	125	13528	6.01244	0.999998	0.106203	14.2134
GOTERM_BP_FAT	GO:0008406~gonad development	5	4.90196	0.00633705	AFP, RBP4, FST, ZFP42, AHSG	90	112	13528	6.71032	0.999851	0.078345	9.93309
GOTERM_BP_FAT	GO:0048608~reproductive structure development	5	4.90196	0.00952949	AFP, RBP4, FST, ZFP42, AHSG	90	126	13528	5.96473	0.999998	0.108105	14.5786
GOTERM_BP_FAT	GO:0045137~development of primary sexual characteristics	5	4.90196	0.00979092	AFP, RBP4, FST, ZFP42, AHSG	90	127	13528	5.91776	0.999999	0.11002	14.9489
GOTERM_BP_FAT	GO:0030334~regulation of cell migration	8	7.84314	0.00012224	COL18A1, TDGF3, INS-IGF2, APOE, TDGF1, F2RL1, RAC1, TGFBR3, IGF2, IGFBP3	90	169	13528	7.11532	0.155858	0.00307589	0.200973
GOTERM_BP_FAT	GO:0040012~regulation of locomotion	8	7.84314	0.000268442	COL18A1, TDGF3, INS-IGF2, APOE, TDGF1, F2RL1, RAC1, TGFBR3, IGF2, IGFBP3	90	192	13528	6.26296	0.310722	0.00608161	0.440846
GOTERM_BP_FAT	GO:0051270~regulation of cell motion	8	7.84314	0.000277075	COL18A1, TDGF3, INS-IGF2, APOE, TDGF1, F2RL1, RAC1, TGFBR3, IGF2, IGFBP3	90	193	13528	6.23051	0.318922	0.00617567	0.454993
GOTERM_BP_FAT	GO:0043086~negative regulation of catalytic activity	7	6.86275	0.00983204	APOA2, APOA1, INS-IGF2, APOE, RGS4, APOC3, APOC1, IGF2	90	277	13528	3.79848	0.999999	0.109575	15.007
GOTERM_BP_FAT	GO:0048729~tissue morphogenesis	6	5.88235	0.00665617	TDGF3, HAND1, FST, TDGF1, TGFBR3, COL1A1, SMARCA4	90	180	13528	5.01037	0.999904	0.0814144	10.4079
GOTERM_CC_FAT	GO:0044421~extracellular region part	39	38.2353	3.43133e-21	RBP4, COL21A1, INS-IGF2, NPNT, APOC1, DCN, AHSG, APOA4, TDGF3, APOB, FGG, APOA2, APOA1, FGA, APOE, FGB, REN, COL6A3, TDGF1, APOC3, COL6A1, SERPINA1, SEPP1, FIGF, SRGN, FN1, COL18A1, HAPLN1, LGALS3, IGF2, NID1, NID2, COL5A1, AFP, FBLN1, THBD, PPBP, TFPI, TGFBR3, COL1A1, IGFBP3	85	960	12782	6.10904	6.41658e-19	6.41658e-19	4.25345e-18
GOTERM_CC_FAT	GO:0005615~extracellular space	29	28.4314	1.31263e-15	RBP4, INS-IGF2, APOC1, AHSG, APOA4, TDGF3, APOA2, FGG, APOB, APOA1, FGA, APOE, FGB, REN, APOC3, TDGF1, COL6A3, SERPINA1, SEPP1, FIGF, SRGN, FN1, COL18A1, IGF2, AFP, FBLN1, THBD, PPBP, TFPI, TGFBR3, IGFBP3	85	685	12782	6.3663	2.49134e-13	1.24567e-13	1.65423e-12
GOTERM_CC_FAT	GO:0005576~extracellular region	45	44.1176	6.65197e-15	RBP4, COL21A1, INS-IGF2, NPNT, FST, APOC1, SPINK1, DCN, MDK, AHSG, APOA4, TDGF3, APOB, FGG, APOA2, APOA1, FGA, APOE, FGB, REN, COL6A3, TDGF1, RSPO2, APOC3, COL6A1, SERPINA1, SEPP1, FIGF, SRGN, FN1, COL18A1, HAPLN1, LGALS3, IGF2, NID1, HGF, NID2, FRZB, COL5A1, AFP, FBLN1, THBD, PPBP, TFPI, TGFBR3, COL1A1, IGFBP3	85	2010	12782	3.36664	1.24567e-12	4.15223e-13	8.26006e-12
GOTERM_CC_FAT	GO:0031983~vesicle lumen	10	9.80392	1.33201e-11	FGG, APOB, FGA, PPBP, FGB, SERPINA1, HGF, FIGF, SRGN, FN1	85	46	12782	32.6905	2.49086e-09	6.22716e-10	1.65115e-08
GOTERM_CC_FAT	GO:0031093~platelet alpha granule lumen	9	8.82353	1.9831e-10	FGG, FGA, PPBP, FGB, SERPINA1, HGF, FIGF, SRGN, FN1	85	41	12782	33.0095	3.70839e-08	7.41678e-09	2.45823e-07
GOTERM_CC_FAT	GO:0060205~cytoplasmic membrane-bounded vesicle lumen	9	8.82353	3.62039e-10	FGG, FGA, PPBP, FGB, SERPINA1, HGF, FIGF, SRGN, FN1	85	44	12782	30.7588	6.77013e-08	1.12836e-08	4.48781e-07
GOTERM_CC_FAT	GO:0031091~platelet alpha granule	9	8.82353	2.72279e-09	FGG, FGA, PPBP, FGB, SERPINA1, HGF, FIGF, SRGN, FN1	85	56	12782	24.1676	5.09161e-07	6.36452e-08	3.37515e-06
GOTERM_CC_FAT	GO:0030141~secretory granule	10	9.80392	2.64887e-06	FGG, APOA1, FGA, PPBP, FGB, SERPINA1, HGF, FIGF, SRGN, FN1	85	180	12782	8.35425	0.000495216	3.53807e-05	0.00328347
GOTERM_CC_FAT	GO:0044433~cytoplasmic vesicle part	10	9.80392	3.62572e-06	FGG, APOB, FGA, PPBP, FGB, SERPINA1, HGF, FIGF, SRGN, FN1	85	187	12782	8.04152	0.000677781	4.51997e-05	0.00449433
GOTERM_CC_FAT	GO:0005577~fibrinogen complex	4	3.92157	9.40308e-06	FGG, FGA, FGB, FN1	85	7	12782	85.9294	0.00175684	0.000109893	0.0116554
GOTERM_CC_FAT	GO:0016023~cytoplasmic membrane-bounded vesicle	14	13.7255	5.68601e-05	HGF, APOB, FGG, APOA1, FGA, PPBP, FGB, RAC1, SERPINA1, SLC40A1, FIGF, SRGN, ATP7B, FN1	85	550	12782	3.82776	0.0105768	0.000590556	0.0704606
GOTERM_CC_FAT	GO:0031988~membrane-bounded vesicle	14	13.7255	7.89296e-05	HGF, APOB, FGG, APOA1, FGA, PPBP, FGB, RAC1, SERPINA1, SLC40A1, FIGF, SRGN, ATP7B, FN1	85	568	12782	3.70646	0.014652	0.000737749	0.0977966
GOTERM_CC_FAT	GO:0031410~cytoplasmic vesicle	14	13.7255	0.000266287	HGF, APOB, FGG, APOA1, FGA, PPBP, FGB, RAC1, SERPINA1, SLC40A1, FIGF, SRGN, ATP7B, FN1	85	642	12782	3.27924	0.0485825	0.00226118	0.329587
GOTERM_CC_FAT	GO:0031982~vesicle	14	13.7255	0.000401857	HGF, APOB, FGG, APOA1, FGA, PPBP, FGB, RAC1, SERPINA1, SLC40A1, FIGF, SRGN, ATP7B, FN1	85	670	12782	3.14219	0.0724071	0.00312686	0.497
GOTERM_CC_FAT	GO:0043233~organelle lumen	22	21.5686	0.00612785	EPAS1, INS-IGF2, IGF2, MYBL1, HGF, HADHA, APOA4, FGG, APOA2, APOB, APOA1, PPBP, HAND1, FGA, FGB, GATA6, HOXA9, FABP1, SERPINA1, FIGF, SRGN, FN1, PITX2	85	1820	12782	1.81774	0.683184	0.0332418	7.33636
GOTERM_CC_FAT	GO:0031974~membrane-enclosed lumen	22	21.5686	0.00766554	EPAS1, INS-IGF2, IGF2, MYBL1, HGF, HADHA, APOA4, FGG, APOA2, APOB, APOA1, PPBP, HAND1, FGA, FGB, GATA6, HOXA9, FABP1, SERPINA1, FIGF, SRGN, FN1, PITX2	85	1856	12782	1.78248	0.76283	0.0391833	9.09795
GOTERM_CC_FAT	GO:0031012~extracellular matrix	16	15.6863	5.94367e-09	COL18A1, HAPLN1, COL21A1, LGALS3, NPNT, NID1, DCN, NID2, COL5A1, AHSG, FBLN1, COL6A3, COL6A1, SERPINA1, COL1A1, FN1	85	345	12782	6.97398	1.11147e-06	1.23496e-07	7.36773e-06
GOTERM_CC_FAT	GO:0005578~proteinaceous extracellular matrix	15	14.7059	1.87166e-08	COL18A1, HAPLN1, COL21A1, LGALS3, NPNT, NID1, DCN, NID2, COL5A1, FBLN1, COL6A3, COL6A1, SERPINA1, COL1A1, FN1	85	320	12782	7.0489	3.49999e-06	3.18182e-07	2.32009e-05
GOTERM_CC_FAT	GO:0044420~extracellular matrix part	8	7.84314	1.13779e-05	COL18A1, COL6A3, COL6A1, NID1, NID2, COL1A1, COL5A1, FN1	85	117	12782	10.2822	0.00212541	0.000125149	0.014103
GOTERM_CC_FAT	GO:0005581~collagen	5	4.90196	7.78061e-05	COL18A1, COL6A3, COL6A1, COL1A1, COL5A1	85	35	12782	21.4824	0.014445	0.000765512	0.0964051
GOTERM_CC_FAT	GO:0034385~triglyceride-rich lipoprotein particle	7	6.86275	2.41981e-09	APOA4, APOA2, APOB, APOA1, APOE, APOC3, APOC1	85	20	12782	52.6318	4.52505e-07	6.46436e-08	2.99958e-06
GOTERM_CC_FAT	GO:0034361~very-low-density lipoprotein particle	7	6.86275	2.41981e-09	APOA4, APOA2, APOB, APOA1, APOE, APOC3, APOC1	85	20	12782	52.6318	4.52505e-07	6.46436e-08	2.99958e-06
GOTERM_CC_FAT	GO:0042627~chylomicron	6	5.88235	8.30074e-09	APOA4, APOA2, APOB, APOE, APOC3, APOC1	85	12	12782	75.1882	1.55224e-06	1.55224e-07	1.02895e-05
GOTERM_CC_FAT	GO:0032994~protein-lipid complex	7	6.86275	9.36721e-08	APOA4, APOA2, APOB, APOA1, APOE, APOC3, APOC1	85	35	12782	30.0753	1.75165e-05	1.45972e-06	0.000116115
GOTERM_CC_FAT	GO:0034358~plasma lipoprotein particle	7	6.86275	9.36721e-08	APOA4, APOA2, APOB, APOA1, APOE, APOC3, APOC1	85	35	12782	30.0753	1.75165e-05	1.45972e-06	0.000116115
GOTERM_CC_FAT	GO:0034364~high-density lipoprotein particle	6	5.88235	5.20712e-07	APOA4, APOA2, APOA1, APOE, APOC3, APOC1	85	25	12782	36.0904	9.73684e-05	7.49021e-06	0.000645469
GOTERM_CC_FAT	GO:0034363~intermediate-density lipoprotein particle	3	2.94118	0.000253876	APOB, APOE, APOC3	85	4	12782	112.782	0.0463713	0.00225844	0.314249
GOTERM_CC_FAT	GO:0034366~spherical high-density lipoprotein particle	3	2.94118	0.00116465	APOA2, APOA1, APOC3	85	8	12782	56.3912	0.195807	0.00867877	1.43415
GOTERM_CC_FAT	GO:0005788~endoplasmic reticulum lumen	5	4.90196	0.00187832	APOA4, APOA2, APOB, APOA1, INS-IGF2, IGF2	85	80	12782	9.39853	0.296422	0.012937	2.3036
GOTERM_CC_FAT	GO:0005577~fibrinogen complex	4	3.92157	9.40308e-06	FGG, FGA, FGB, FN1	85	7	12782	85.9294	0.00175684	0.000109893	0.0116554
GOTERM_CC_FAT	GO:0005788~endoplasmic reticulum lumen	5	4.90196	0.00187832	APOA4, APOA2, APOB, APOA1, INS-IGF2, IGF2	85	80	12782	9.39853	0.296422	0.012937	2.3036
GOTERM_CC_FAT	GO:0044420~extracellular matrix part	8	7.84314	1.13779e-05	COL18A1, COL6A3, COL6A1, NID1, NID2, COL1A1, COL5A1, FN1	85	117	12782	10.2822	0.00212541	0.000125149	0.014103
GOTERM_CC_FAT	GO:0005604~basement membrane	5	4.90196	0.00171096	COL18A1, NID1, NID2, COL5A1, FN1	85	78	12782	9.63952	0.274013	0.0122407	2.10034
GOTERM_CC_FAT	GO:0005833~hemoglobin complex	3	2.94118	0.00269874	HBG1, HBG2, HBE1	85	12	12782	37.5941	0.396704	0.0178862	3.29438
GOTERM_CC_FAT	GO:0030057~desmosome	4	3.92157	0.000287921	DSG2, PKP2, DSP, PERP	85	20	12782	30.0753	0.0524247	0.00233852	0.356319
GOTERM_CC_FAT	GO:0043296~apical junction complex	5	4.90196	0.00406906	F11R, DSG2, PKP2, DSP, PERP	85	99	12782	7.59477	0.533486	0.0242957	4.92867
GOTERM_CC_FAT	GO:0016327~apicolateral plasma membrane	5	4.90196	0.0045259	F11R, DSG2, PKP2, DSP, PERP	85	102	12782	7.3714	0.571842	0.0253774	5.46783
GOTERM_CC_FAT	GO:0005911~cell-cell junction	6	5.88235	0.00824476	F11R, DSG2, PKP2, DSP, CDH1, PERP	85	190	12782	4.74873	0.787361	0.0409789	9.75347
GOTERM_CC_FAT	GO:0019897~extrinsic to plasma membrane	4	3.92157	0.0042959	TDGF3, APOE, TDGF1, RAC1, CDH1	85	50	12782	12.0301	0.552941	0.0248444	5.19674
GOTERM_CC_FAT	GO:0044459~plasma membrane part	26	25.4902	0.00316607	F2RL1, CDH1, AQP1, EPCAM, TDGF3, FGG, FGA, APOE, FGB, RAC1, TDGF1, FN1, F11R, PODXL, CD99, FZD2, SLC9A3R1, SLC16A3, THBD, DSG2, PKP2, DSP, TGFBR3, PERP, SLC40A1, HS3ST3B1, ATP7B	85	2203	12782	1.77476	0.44733	0.0202404	3.85461
GOTERM_CC_FAT	GO:0005886~plasma membrane	38	37.2549	0.0032835	PTOV1, F2RL1, CDH1, AQP1, EPCAM, TDGF3, APOB, FGG, APOA1, FGA, APOE, FGB, SLC2A3, COL6A3, TDGF1, RAC1, KRT8, COL6A1, FN1, F11R, LGALS3, PODXL, CD99, FZD2, SLC9A3R1, RGS13, SLC16A3, KRT19, THBD, DSG2, PKP2, TFPI, TGFBR3, DSP, COL1A1, PERP, SLC40A1, HS3ST3B1, ATP7B	85	3777	12782	1.51292	0.459373	0.0202921	3.99491
GOTERM_MF_FAT	GO:0005539~glycosaminoglycan binding	9	8.82353	3.27095e-06	HAPLN1, APOB, APOE, RSPO2, TGFBR3, DCN, MDK, COL5A1, FN1	85	140	12983	9.81908	0.000820673	0.00011728	0.00425186
GOTERM_MF_FAT	GO:0030247~polysaccharide binding	9	8.82353	6.64137e-06	HAPLN1, APOB, APOE, RSPO2, TGFBR3, DCN, MDK, COL5A1, FN1	85	154	12983	8.92643	0.0016656	0.000208352	0.00863285
GOTERM_MF_FAT	GO:0001871~pattern binding	9	8.82353	6.64137e-06	HAPLN1, APOB, APOE, RSPO2, TGFBR3, DCN, MDK, COL5A1, FN1	85	154	12983	8.92643	0.0016656	0.000208352	0.00863285
GOTERM_MF_FAT	GO:0008201~heparin binding	7	6.86275	5.30623e-05	APOB, APOE, RSPO2, TGFBR3, MDK, COL5A1, FN1	85	103	12983	10.3805	0.0132307	0.00133101	0.0689544
GOTERM_MF_FAT	GO:0030246~carbohydrate binding	10	9.80392	0.000457462	HAPLN1, APOB, LGALS3, APOE, RSPO2, TGFBR3, DCN, MDK, COL5A1, FN1	85	354	12983	4.31472	0.108499	0.00762738	0.593031
GOTERM_MF_FAT	GO:0019838~growth factor binding	6	5.88235	0.000584904	INS-IGF2, TGFBR3, COL6A1, IGF2, COL1A1, IGFBP3, COL5A1	85	105	12983	8.72807	0.13658	0.00913637	0.757661
GOTERM_MF_FAT	GO:0048407~platelet-derived growth factor binding	3	2.94118	0.00219048	COL6A1, COL1A1, COL5A1	85	11	12983	41.6567	0.423289	0.0258697	2.81031
GOTERM_MF_FAT	GO:0005201~extracellular matrix structural constituent	5	4.90196	0.00231447	COL18A1, FBLN1, COL1A1, COL5A1, FN1	85	86	12983	8.8803	0.441	0.0260903	2.96719
GOTERM_MF_FAT	GO:0060228~phosphatidylcholine-sterol O-acyltransferase activator activity	5	4.90196	8.11297e-09	APOA4, APOA2, APOA1, APOE, APOC1	85	5	12983	152.741	2.03635e-06	2.03635e-06	1.05461e-05
GOTERM_MF_FAT	GO:0005543~phospholipid binding	12	11.7647	1.73679e-08	APOA4, APOA2, APOB, ANXA8, APOA1, ANXA8L1, APOE, APOC3, APOC1, ANXA8L2, FABP1, ANXA3	85	177	12983	10.3553	4.35934e-06	2.17967e-06	2.25768e-05
GOTERM_MF_FAT	GO:0017127~cholesterol transporter activity	5	4.90196	7.75883e-07	APOA4, APOA2, APOB, APOA1, APOE	85	12	12983	63.6422	0.000194728	6.49134e-05	0.00100857
GOTERM_MF_FAT	GO:0008289~lipid binding	15	14.7059	1.01714e-06	RBP4, RBP2, APOC1, ANXA3, HADHA, APOA4, APOA2, APOB, ANXA8, APOA1, ANXA8L1, APOE, APOC3, ANXA8L2, FABP1	85	450	12983	5.09137	0.000255269	6.38232e-05	0.00132218
GOTERM_MF_FAT	GO:0015248~sterol transporter activity	5	4.90196	1.55359e-06	APOA4, APOA2, APOB, APOA1, APOE	85	14	12983	54.5504	0.000389875	7.79872e-05	0.00201951
GOTERM_MF_FAT	GO:0070325~lipoprotein receptor binding	5	4.90196	2.1081e-06	APOA2, APOB, APOA1, APOE, APOC3	85	15	12983	50.9137	0.000528994	8.81851e-05	0.00274031
GOTERM_MF_FAT	GO:0005319~lipid transporter activity	6	5.88235	5.26372e-05	APOA4, APOA2, APOB, APOA1, APOE, FABP1	85	63	12983	14.5468	0.0131254	0.00146696	0.0684021
GOTERM_MF_FAT	GO:0055102~lipase inhibitor activity	4	3.92157	0.000112394	APOA2, APOC3, APOC1, ANXA3	85	15	12983	40.731	0.0278182	0.00234828	0.146004
GOTERM_MF_FAT	GO:0070653~high-density lipoprotein receptor binding	3	2.94118	0.000123575	APOA2, APOA1, APOC3	85	3	12983	152.741	0.030543	0.00238324	0.160517
GOTERM_MF_FAT	GO:0031210~phosphatidylcholine binding	3	2.94118	0.000610107	APOA4, APOA2, APOC1	85	6	12983	76.3706	0.142028	0.00847409	0.790189
GOTERM_MF_FAT	GO:0050997~quaternary ammonium group binding	3	2.94118	0.00144588	APOA4, APOA2, APOC1	85	9	12983	50.9137	0.304537	0.017995	1.8633
GOTERM_MF_FAT	GO:0015485~cholesterol binding	3	2.94118	0.00528176	APOA2, APOA1, APOC3	85	17	12983	26.9543	0.735321	0.0463635	6.65242
GOTERM_MF_FAT	GO:0008047~enzyme activator activity	8	7.84314	0.00592411	APOA4, APOA2, APOA1, APOE, RGS4, APOC1, IGFBP3, FN1	85	335	12983	3.64755	0.774937	0.0501267	7.43297
GOTERM_MF_FAT	GO:0032934~sterol binding	3	2.94118	0.00658563	APOA2, APOA1, APOC3	85	19	12983	24.117	0.809568	0.0537818	8.23053
GOTERM_MF_FAT	GO:0005496~steroid binding	4	3.92157	0.00819594	APOA2, APOA1, APOC3, FABP1	85	64	12983	9.54632	0.873265	0.0644626	10.1455
GOTERM_MF_FAT	GO:0005544~calcium-dependent phospholipid binding	4	3.92157	0.000610087	ANXA8, ANXA8L1, ANXA8L2, ANXA3	85	26	12983	23.4986	0.142023	0.00897002	0.790162
GOTERM_MF_FAT	GO:0043499~eukaryotic cell surface binding	4	3.92157	0.00016641	APOA4, FGG, FGA, FGB	85	17	12983	35.9391	0.0409119	0.00297929	0.216102
GOTERM_MF_FAT	GO:0043498~cell surface binding	4	3.92157	0.000845497	APOA4, FGG, FGA, FGB	85	29	12983	21.0677	0.191286	0.011112	1.09351
GOTERM_MF_FAT	GO:0004857~enzyme inhibitor activity	10	9.80392	6.00297e-05	SERPINB9, APOA2, COL6A3, APOC3, TFPI, APOC1, SPINK1, SERPINA1, ANXA3, AHSG	85	270	12983	5.65708	0.014955	0.00136887	0.0780052
GOTERM_MF_FAT	GO:0004866~endopeptidase inhibitor activity	6	5.88235	0.00246775	SERPINB9, COL6A3, TFPI, SPINK1, SERPINA1, AHSG	85	145	12983	6.32032	0.462147	0.0266037	3.16079
GOTERM_MF_FAT	GO:0004867~serine-type endopeptidase inhibitor activity	5	4.90196	0.00295751	SERPINB9, COL6A3, TFPI, SPINK1, SERPINA1	85	92	12983	8.30115	0.524523	0.0305016	3.77703
GOTERM_MF_FAT	GO:0030414~peptidase inhibitor activity	6	5.88235	0.00311233	SERPINB9, COL6A3, TFPI, SPINK1, SERPINA1, AHSG	85	153	12983	5.98985	0.542699	0.0296446	3.97107
GOTERM_MF_FAT	GO:0008083~growth factor activity	6	5.88235	0.00387063	TDGF3, PPBP, INS-IGF2, TDGF1, IGF2, HGF, FIGF, MDK	85	161	12983	5.69222	0.622209	0.0354102	4.91628
GOTERM_MF_FAT	GO:0008201~heparin binding	7	6.86275	5.30623e-05	APOB, APOE, RSPO2, TGFBR3, MDK, COL5A1, FN1	85	103	12983	10.3805	0.0132307	0.00133101	0.0689544
GOTERM_MF_FAT	GO:0005344~oxygen transporter activity	3	2.94118	0.00308051	HBG1, HBG2, HBE1	85	13	12983	35.248	0.53902	0.0305012	3.93121
GOTERM_MF_FAT	GO:0019838~growth factor binding	6	5.88235	0.000584904	INS-IGF2, TGFBR3, COL6A1, IGF2, COL1A1, IGFBP3, COL5A1	85	105	12983	8.72807	0.13658	0.00913637	0.757661
GOTERM_MF_FAT	GO:0008083~growth factor activity	6	5.88235	0.00387063	TDGF3, PPBP, INS-IGF2, TDGF1, IGF2, HGF, FIGF, MDK	85	161	12983	5.69222	0.622209	0.0354102	4.91628
INTERPRO	IPR008160:Collagen triple helix repeat	6	5.88235	0.000106067	COL18A1, COL21A1, COL6A3, COL6A1, COL1A1, COL5A1	94	84	16659	12.6588	0.0260664	0.00876542	0.137617
INTERPRO	IPR013326:Apolipoprotein/apolipophorin	3	2.94118	0.000183646	APOA4, APOA1, APOE	94	4	16659	132.918	0.0447021	0.00910471	0.238161
INTERPRO	IPR000074:Apolipoprotein A1/A4/E	3	2.94118	0.000183646	APOA4, APOA1, APOE	94	4	16659	132.918	0.0447021	0.00910471	0.238161
INTERPRO	IPR001464:Annexin	4	3.92157	5.86364e-05	ANXA8, ANXA8L1, ANXA8L2, ANXA3	94	14	16659	50.6353	0.0144948	0.0144948	0.0760995
INTERPRO	IPR018252:Annexin repeat, conserved site	4	3.92157	5.86364e-05	ANXA8, ANXA8L1, ANXA8L2, ANXA3	94	14	16659	50.6353	0.0144948	0.0144948	0.0760995
INTERPRO	IPR018502:Annexin repeat	4	3.92157	5.86364e-05	ANXA8, ANXA8L1, ANXA8L2, ANXA3	94	14	16659	50.6353	0.0144948	0.0144948	0.0760995
INTERPRO	IPR009115:Annexin, type VIII	3	2.94118	9.21585e-05	ANXA8, ANXA8L1, ANXA8L2	94	3	16659	177.223	0.0226872	0.0114087	0.119581
INTERPRO	IPR000716:Thyroglobulin type-1	4	3.92157	0.000108218	EPCAM, NID1, NID2, IGFBP3	94	17	16659	41.6996	0.0265878	0.00671427	0.140405
INTERPRO	IPR012290:Fibrinogen, alpha/beta/gamma chain, coiled coil	3	2.94118	9.21585e-05	FGG, FGA, FGB	94	3	16659	177.223	0.0226872	0.0114087	0.119581
INTERPRO	IPR014716:Fibrinogen, alpha/beta/gamma chain, C-terminal globular, subdomain 1	3	2.94118	0.00722737	FGG, FGA, FGB	94	23	16659	23.1161	0.835715	0.121035	8.98738
INTERPRO	IPR013091:EGF calcium-binding	5	4.90196	0.000700631	FBLN1, THBD, NPNT, NID1, NID2	94	72	16659	12.3072	0.160138	0.024623	0.905804
INTERPRO	IPR001881:EGF-like calcium-binding	5	4.90196	0.00204358	FBLN1, THBD, NPNT, NID1, NID2	94	96	16659	9.23039	0.399127	0.055025	2.62089
INTERPRO	IPR018097:EGF-like calcium-binding, conserved site	5	4.90196	0.00204358	FBLN1, THBD, NPNT, NID1, NID2	94	96	16659	9.23039	0.399127	0.055025	2.62089
INTERPRO	IPR000152:EGF-type aspartate/asparagine hydroxylation conserved site	5	4.90196	0.00212248	FBLN1, THBD, NPNT, NID1, NID2	94	97	16659	9.13523	0.410841	0.0515307	2.72079
INTERPRO	IPR000742:EGF-like, type 3	6	5.88235	0.00462237	TDGF3, FBLN1, THBD, NPNT, TDGF1, NID1, NID2	94	194	16659	5.48114	0.684514	0.0995641	5.8377
INTERPRO	IPR006210:EGF-like	6	5.88235	0.00536343	TDGF3, FBLN1, THBD, NPNT, TDGF1, NID1, NID2	94	201	16659	5.29025	0.737916	0.10559	6.7438
INTERPRO	IPR013032:EGF-like region, conserved site	7	6.86275	0.00597232	TDGF3, FBLN1, THBD, NPNT, TDGF1, NID1, NID2, FN1	94	293	16659	4.23401	0.77498	0.108398	7.48225
INTERPRO	IPR002337:Haemoglobin, beta	3	2.94118	0.000304963	HBG1, HBG2, HBE1	94	5	16659	106.334	0.073135	0.0125781	0.395204
INTERPRO	IPR000971:Globin, subset	3	2.94118	0.00196212	HBG1, HBG2, HBE1	94	12	16659	44.3059	0.38679	0.0593	2.51765
INTERPRO	IPR012292:Globin	3	2.94118	0.00196212	HBG1, HBG2, HBE1	94	12	16659	44.3059	0.38679	0.0593	2.51765
KEGG_PATHWAY	hsa04510:Focal adhesion	8	7.84314	0.000603198	COL6A3, RAC1, COL6A1, HGF, COL1A1, FIGF, COL5A1, FN1	39	201	5085	5.18944	0.0396202	0.0200103	0.616934
KEGG_PATHWAY	hsa04512:ECM-receptor interaction	5	4.90196	0.00333566	COL6A3, COL6A1, COL1A1, COL5A1, FN1	39	84	5085	7.76099	0.200575	0.0719049	3.36883
KEGG_PATHWAY	hsa04610:Complement and coagulation cascades	6	5.88235	0.00014094	FGG, THBD, FGA, FGB, TFPI, SERPINA1	39	69	5085	11.3378	0.00939917	0.00939917	0.144458
OMIM_DISEASE	Newly identified loci that influence lipid concentrations and risk of coronary artery disease	6	5.88235	2.34695e-05	APOA4, APOB, APOA1, APOE, APOC3, APOC1	47	29	3671	16.1599	0.00314	0.00314	0.0274753
OMIM_DISEASE	Six new loci associated with blood low-density lipoprotein cholesterol, high-density lipoprotein cholesterol or triglycerides in humans	6	5.88235	5.24791e-05	APOA4, APOB, APOA1, APOE, APOC3, APOC1	47	34	3671	13.7835	0.00700772	0.00351002	0.0614269
OMIM_DISEASE	Common variants at 30 loci contribute to polygenic dyslipidemia	6	5.88235	0.000207907	APOA4, APOB, APOA1, APOE, APOC3, APOC1	47	45	3671	10.4142	0.0274778	0.00924447	0.243153
OMIM_DISEASE	Loci influencing lipid levels and coronary heart disease risk in 16 European population cohorts	5	4.90196	0.00040776	APOA4, APOB, APOA1, APOE, APOC3	47	29	3671	13.4666	0.0531845	0.0135698	0.476377
OMIM_DISEASE	A null mutation in human APOC3 confers a favorable plasma lipid profile and apparent cardioprotection	3	2.94118	0.00149993	APOA4, APOA1, APOC3	47	5	3671	46.8638	0.182203	0.0394298	1.74212
PIR_SUPERFAMILY	PIRSF002367:apolipoprotein A-I	5	4.90196	6.63303e-08	APOA2, APOA1, APOE, APOC3, APOC1	63	6	7396	97.8307	4.31146e-06	4.31146e-06	6.76036e-05
PIR_SUPERFAMILY	PIRSF002359:annexin I	4	3.92157	0.000116962	ANXA8, ANXA8L1, ANXA8L2, ANXA3	63	12	7396	39.1323	0.00757412	0.00379426	0.119143
PIR_SUPERFAMILY	PIRSF500045:hemoglobin, vertebrate type	3	2.94118	0.00187426	HBG1, HBG2, HBE1	63	8	7396	44.0238	0.1148	0.0398321	1.89387
PIR_SUPERFAMILY	PIRSF036518:globin	3	2.94118	0.0036224	HBG1, HBG2, HBE1	63	11	7396	32.0173	0.210127	0.0572657	3.63108
SMART	SM00335:ANX	4	3.92157	0.000104637	ANXA8, ANXA8L1, ANXA8L2, ANXA3	63	14	9079	41.1746	0.00719429	0.00719429	0.107918
SMART	SM00211:TY	4	3.92157	0.000192638	EPCAM, NID1, NID2, IGFBP3	63	17	9079	33.9085	0.0132053	0.00662461	0.198598
SMART	SM00179:EGF_CA	5	4.90196	0.004099	FBLN1, THBD, NPNT, NID1, NID2	63	96	9079	7.50579	0.246791	0.0901456	4.14975
SP_PIR_KEYWORDS	Secreted	41	40.1961	6.21958e-18	RBP4, COL21A1, INS-IGF2, NPNT, FST, APOC1, SPINK1, DCN, MDK, AHSG, APOA4, APOB, FGG, APOA2, APOA1, FGA, APOE, FGB, REN, COL6A3, RSPO2, APOC3, COL6A1, SERPINA1, SEPP1, FIGF, SRGN, FN1, COL18A1, HAPLN1, IGF2, NID1, NID2, FRZB, COL5A1, AFP, FBLN1, PPBP, TFPI, TGFBR3, COL1A1, IGFBP3	98	1689	19235	4.76453	1.5238e-15	7.61898e-16	8.05414e-15
SP_PIR_KEYWORDS	signal	51	50	4.96658e-15	COL21A1, INS-IGF2, NPNT, FST, F2RL1, SPINK1, EPCAM, APOA4, TDGF3, APOB, APOA2, APOA1, APOE, TDGF1, RSPO2, SERPINA1, SEPP1, F11R, THBD, PPBP, TFPI, COL1A1, RBP4, APOC1, CDH1, DCN, MDK, AHSG, FGG, FGA, FGB, REN, APOC3, COL6A3, COL6A1, FIGF, SRGN, FN1, COL18A1, PODXL, CD99, NID1, IGF2, NID2, HGF, FZD2, FRZB, COL5A1, AFP, FBLN1, DSG2, TGFBR3, IGFBP3	98	3250	19235	3.08002	1.22402e-12	4.08007e-13	6.4726e-12
SP_PIR_KEYWORDS	glycoprotein	50	49.0196	1.27372e-09	COL21A1, INS-IGF2, FST, F2RL1, AQP1, EPCAM, TDGF3, APOB, APOA1, SLC2A3, APOE, TDGF1, RSPO2, SERPINA1, SEPP1, F11R, THBD, TFPI, COL1A1, SLC40A1, HS3ST3B1, CDH1, DCN, AHSG, FGG, FGA, FGB, REN, APOC3, KRT8, COL6A3, COL6A1, FIGF, SRGN, FN1, COL18A1, HAPLN1, PODXL, CD99, NID1, IGF2, NID2, HGF, FZD2, FRZB, COL5A1, ANXA3, AFP, FBLN1, DSG2, TGFBR3, IGFBP3	98	4318	19235	2.27276	3.12061e-07	4.45802e-08	1.64942e-06
SP_PIR_KEYWORDS	disulfide bond	40	39.2157	2.09072e-09	RBP4, INS-IGF2, NPNT, FST, F2RL1, SPINK1, CDH1, DCN, MDK, AHSG, EPCAM, TDGF3, APOB, FGG, APOA2, FGA, FGB, REN, COL6A3, TDGF1, RSPO2, FIGF, SRGN, FN1, COL18A1, F11R, HAPLN1, LGALS3, IGF2, NID1, HGF, NID2, FZD2, FRZB, AFP, FBLN1, THBD, PPBP, TFPI, COL1A1, IGFBP3, HS3ST3B1	98	2924	19235	2.68503	5.12225e-07	5.69139e-08	2.70741e-06
SP_PIR_KEYWORDS	heparin-binding	6	5.88235	1.91092e-05	APOB, APOE, RSPO2, MDK, COL5A1, FN1	98	65	19235	18.1177	0.00467086	0.000260066	0.024743
SP_PIR_KEYWORDS	extracellular matrix	14	13.7255	2.49091e-10	COL18A1, HAPLN1, COL21A1, NPNT, NID1, NID2, DCN, COL5A1, FBLN1, COL6A3, COL6A1, SERPINA1, COL1A1, FN1	98	241	19235	11.4019	6.10274e-08	1.01712e-08	3.22565e-07
SP_PIR_KEYWORDS	pyroglutamic acid	8	7.84314	3.03462e-09	APOA2, FGB, COL6A3, COL6A1, HGF, COL1A1, COL5A1, FN1	98	46	19235	34.1349	7.43482e-07	6.75893e-08	3.92973e-06
SP_PIR_KEYWORDS	Pyrrolidone carboxylic acid	7	6.86275	1.09526e-06	EPCAM, APOA2, FGB, COL6A3, HGF, COL1A1, FN1	98	67	19235	20.5064	0.000268302	1.91668e-05	0.00141831
SP_PIR_KEYWORDS	hydroxylation	7	6.86275	1.54654e-06	COL18A1, THBD, EPAS1, COL6A3, COL6A1, COL1A1, COL5A1	98	71	19235	19.3511	0.000378831	2.52599e-05	0.0020027
SP_PIR_KEYWORDS	collagen	6	5.88235	0.000118985	COL18A1, COL21A1, COL6A3, COL6A1, COL1A1, COL5A1	98	95	19235	12.3963	0.0287322	0.00107916	0.153972
SP_PIR_KEYWORDS	trimer	4	3.92157	0.000297119	COL6A3, COL6A1, COL1A1, COL5A1	98	26	19235	30.1962	0.0702178	0.0025968	0.384077
SP_PIR_KEYWORDS	triple helix	4	3.92157	0.000504375	COL6A3, COL6A1, COL1A1, COL5A1	98	31	19235	25.3259	0.116269	0.00397925	0.651183
SP_PIR_KEYWORDS	hydroxylysine	4	3.92157	0.000504375	COL6A3, COL6A1, COL1A1, COL5A1	98	31	19235	25.3259	0.116269	0.00397925	0.651183
SP_PIR_KEYWORDS	hydroxyproline	4	3.92157	0.000852974	COL6A3, COL6A1, COL1A1, COL5A1	98	37	19235	21.219	0.18866	0.00595556	1.09896
SP_PIR_KEYWORDS	cell binding	3	2.94118	0.00253216	COL6A3, COL6A1, NID1	98	15	19235	39.2551	0.462682	0.0140182	3.2299
SP_PIR_KEYWORDS	plasma	17	16.6667	1.30725e-20	RBP4, APOC1, AHSG, APOA4, AFP, FGG, APOA2, APOB, APOA1, FGA, FGB, APOE, REN, APOC3, SERPINA1, SEPP1, FN1	98	93	19235	35.8783	3.20277e-18	3.20277e-18	1.69285e-17
SP_PIR_KEYWORDS	liver	11	10.7843	3.38725e-13	RBP4, APOA2, FGG, APOB, APOA1, FGA, FGB, APOC3, APOC1, SEPP1, AHSG	98	59	19235	36.5937	8.29886e-11	2.07472e-11	4.38638e-10
SP_PIR_KEYWORDS	intestine	7	6.86275	1.75881e-09	EPCAM, APOA4, APOA2, APOB, APOA1, APOC3, APOC1	98	24	19235	57.247	4.30909e-07	5.38636e-08	2.2776e-06
SP_PIR_KEYWORDS	lipid transport	7	6.86275	6.88499e-07	APOA4, APOA2, APOB, APOA1, APOE, APOC3, APOC1	98	62	19235	22.1601	0.000168668	1.29755e-05	0.00089158
SP_PIR_KEYWORDS	lipid binding	5	4.90196	1.7613e-06	APOA4, APOB, APOA1, APOE, FABP1	98	18	19235	54.521	0.000431425	2.69695e-05	0.0022808
SP_PIR_KEYWORDS	chylomicron	4	3.92157	1.99201e-05	APOA4, APOB, APOE, APOC3	98	11	19235	71.3729	0.00486858	0.000256834	0.0257928
SP_PIR_KEYWORDS	vldl	4	3.92157	2.64629e-05	APOB, APOE, APOC3, APOC1	98	12	19235	65.4252	0.00646253	0.000324122	0.0342632
SP_PIR_KEYWORDS	hdl	4	3.92157	9.60192e-05	APOA4, APOA2, APOA1, APOE	98	18	19235	43.6168	0.0232513	0.00090443	0.12427
SP_PIR_KEYWORDS	lipoprotein	12	11.7647	0.000387352	APOC1, APOA4, TDGF3, APOB, APOA2, APOA1, APOE, RGS4, RAC1, APOC3, TDGF1, TFPI, DSP	98	642	19235	3.6687	0.0905539	0.00315899	0.500448
SP_PIR_KEYWORDS	atherosclerosis	3	2.94118	0.000885457	APOB, APOA1, APOE	98	9	19235	65.4252	0.195097	0.00601056	1.14059
SP_PIR_KEYWORDS	transport	18	17.6471	0.00393071	RBP4, RBP2, APOC1, AQP1, SLC16A3, APOA4, APOA2, APOB, APOA1, SLC2A3, APOE, APOC3, HBG1, FABP1, HBG2, HBE1, SLC40A1, ATP7B	98	1670	19235	2.11554	0.618987	0.0207581	4.97229
SP_PIR_KEYWORDS	annexin	4	3.92157	4.34643e-05	ANXA8, ANXA8L1, ANXA8L2, ANXA3	98	14	19235	56.0787	0.0105925	0.000506966	0.0562702
SP_PIR_KEYWORDS	calcium/phospholipid-binding	4	3.92157	5.41317e-05	ANXA8, ANXA8L1, ANXA8L2, ANXA3	98	15	19235	52.3401	0.0131751	0.000602664	0.070076
SP_PIR_KEYWORDS	endonexin fold	3	2.94118	0.00134391	ANXA8, ANXA8L2, ANXA3	98	11	19235	53.5297	0.280702	0.00863305	1.72642
SP_PIR_KEYWORDS	calcium binding	5	4.90196	0.00183469	ANXA8, CDH1, ANXA8L2, NID1, ANXA3	98	103	19235	9.52794	0.362316	0.0111848	2.34999
SP_PIR_KEYWORDS	phospholipid binding	3	2.94118	0.00544435	ANXA8, ANXA8L2, ANXA3	98	22	19235	26.7648	0.737502	0.0263956	6.82541
SP_PIR_KEYWORDS	blood coagulation	8	7.84314	2.1905e-09	FGG, ANXA8, THBD, FGA, FGB, TFPI, ANXA8L2, SERPINA1	98	44	19235	35.6865	5.36673e-07	5.36674e-08	2.83663e-06
SP_PIR_KEYWORDS	chondroitin sulfate proteoglycan	4	3.92157	8.03095e-05	THBD, TGFBR3, DCN, SRGN	98	17	19235	46.1825	0.0194843	0.000819524	0.103948
SP_PIR_KEYWORDS	proteoglycan	4	3.92157	0.00255953	HAPLN1, TGFBR3, DCN, SRGN	98	54	19235	14.5389	0.466283	0.0138562	3.26429
SP_PIR_KEYWORDS	Serine protease inhibitor	5	4.90196	0.000716805	SERPINB9, COL6A3, TFPI, SPINK1, SERPINA1	98	80	19235	12.2672	0.161114	0.00515374	0.924273
SP_PIR_KEYWORDS	protease inhibitor	5	4.90196	0.00210896	SERPINB9, COL6A3, TFPI, SPINK1, SERPINA1	98	107	19235	9.17175	0.403837	0.0125364	2.69689
SP_PIR_KEYWORDS	serine proteinase inhibitor	3	2.94118	0.00544435	TFPI, SPINK1, SERPINA1	98	22	19235	26.7648	0.737502	0.0263956	6.82541
SP_PIR_KEYWORDS	growth factor	6	5.88235	0.00052991	TDGF3, PPBP, INS-IGF2, TDGF1, IGF2, HGF, FIGF, MDK	98	131	19235	8.98972	0.121784	0.00404997	0.684047
SP_PIR_KEYWORDS	mitogen	4	3.92157	0.00099597	PPBP, INS-IGF2, IGF2, FIGF, MDK	98	39	19235	20.1308	0.216618	0.0065765	1.2821
SP_PIR_KEYWORDS	cleavage on pair of basic residues	7	6.86275	0.00250809	APOA2, DSG2, PPBP, INS-IGF2, REN, CDH1, IGF2, FIGF	98	271	19235	5.06985	0.459496	0.0142064	3.19966
SP_PIR_KEYWORDS	egf-like domain	6	5.88235	0.00618995	TDGF3, FBLN1, THBD, NPNT, TDGF1, NID1, NID2	98	230	19235	5.12023	0.781561	0.029388	7.72591
SP_PIR_KEYWORDS	oxygen carrier	3	2.94118	0.000690959	HBG1, HBG2, HBE1	98	8	19235	73.6033	0.155781	0.00511848	0.891084
SP_PIR_KEYWORDS	blood	3	2.94118	0.00134391	HBG1, HBG2, HBE1	98	11	19235	53.5297	0.280702	0.00863305	1.72642
SP_PIR_KEYWORDS	oxygen transport	3	2.94118	0.0016074	HBG1, HBG2, HBE1	98	12	19235	49.0689	0.325734	0.010055	2.06166
SP_PIR_KEYWORDS	erythrocyte	3	2.94118	0.00450747	HBG1, HBG2, HBE1	98	20	19235	29.4413	0.669394	0.0232744	5.68238
SP_PIR_KEYWORDS	heterotetramer	4	3.92157	0.00512023	S100A10, HBG1, HBG2, HBE1	98	69	19235	11.3783	0.715687	0.0253403	6.43142
SP_PIR_KEYWORDS	calcium binding	5	4.90196	0.00183469	ANXA8, CDH1, ANXA8L2, NID1, ANXA3	98	103	19235	9.52794	0.362316	0.0111848	2.34999
SP_PIR_KEYWORDS	calcium	12	11.7647	0.00237202	FGG, APOB, ANXA8, FBLN1, DSG2, ANXA8L1, NPNT, CDH1, ANXA8L2, NID1, NID2, ANXA3	98	803	19235	2.93313	0.441128	0.0137577	3.02852
SP_PIR_KEYWORDS	hydroxylation	7	6.86275	1.54654e-06	COL18A1, THBD, EPAS1, COL6A3, COL6A1, COL1A1, COL5A1	98	71	19235	19.3511	0.000378831	2.52599e-05	0.0020027
SP_PIR_KEYWORDS	growth factor	6	5.88235	0.00052991	TDGF3, PPBP, INS-IGF2, TDGF1, IGF2, HGF, FIGF, MDK	98	131	19235	8.98972	0.121784	0.00404997	0.684047
UP_SEQ_FEATURE	signal peptide	51	50	6.50078e-15	COL21A1, INS-IGF2, NPNT, FST, F2RL1, SPINK1, EPCAM, APOA4, TDGF3, APOB, APOA2, APOA1, APOE, TDGF1, RSPO2, SERPINA1, SEPP1, F11R, THBD, PPBP, TFPI, COL1A1, RBP4, APOC1, CDH1, DCN, MDK, AHSG, FGG, FGA, FGB, REN, APOC3, COL6A3, COL6A1, FIGF, SRGN, FN1, COL18A1, PODXL, CD99, NID1, IGF2, NID2, HGF, FZD2, FRZB, COL5A1, AFP, FBLN1, DSG2, TGFBR3, IGFBP3	98	3250	19113	3.06048	3.66163e-12	3.66163e-12	9.58122e-12
UP_SEQ_FEATURE	disulfide bond	40	39.2157	8.59098e-10	RBP4, INS-IGF2, NPNT, FST, F2RL1, SPINK1, CDH1, DCN, MDK, AHSG, EPCAM, TDGF3, APOB, FGG, APOA2, FGA, FGB, REN, COL6A3, TDGF1, RSPO2, FIGF, SRGN, FN1, COL18A1, F11R, HAPLN1, LGALS3, IGF2, NID1, HGF, NID2, FZD2, FRZB, AFP, FBLN1, THBD, PPBP, TFPI, COL1A1, IGFBP3, HS3ST3B1	98	2819	19113	2.76737	4.80235e-07	2.40118e-07	1.25653e-06
UP_SEQ_FEATURE	glycosylation site:N-linked (GlcNAc...)	40	39.2157	2.57376e-05	COL21A1, FST, F2RL1, CDH1, DCN, AQP1, AHSG, EPCAM, TDGF3, APOB, FGG, FGA, FGB, SLC2A3, REN, COL6A3, TDGF1, RSPO2, COL6A1, SERPINA1, SEPP1, FIGF, FN1, COL18A1, F11R, HAPLN1, PODXL, NID1, NID2, FZD2, FRZB, AFP, FBLN1, THBD, DSG2, TFPI, TGFBR3, COL1A1, SLC40A1, IGFBP3, HS3ST3B1	98	4129	19113	1.88937	0.0142845	0.00359041	0.0376375
UP_SEQ_FEATURE	short sequence motif:Cell attachment site	6	5.88235	8.5211e-05	COL18A1, COL6A3, COL6A1, NID1, COL1A1, FN1	98	88	19113	13.2975	0.0465182	0.00678189	0.124558
UP_SEQ_FEATURE	region of interest:Triple-helical region	4	3.92157	0.000208462	COL6A3, COL6A1, COL1A1, COL5A1	98	23	19113	33.9184	0.110008	0.0144622	0.304467
UP_SEQ_FEATURE	domain:TSP N-terminal	3	2.94118	0.00601685	COL18A1, COL21A1, COL5A1	98	23	19113	25.4388	0.965733	0.201408	8.44855
UP_SEQ_FEATURE	repeat:2	6	5.88235	0.00837432	APOA4, APOA1, LGALS3, APOE, FIGF, SRGN	98	246	19113	4.75684	0.990913	0.241587	11.5736
UP_SEQ_FEATURE	repeat:5	5	4.90196	0.00840803	APOA4, APOA1, LGALS3, APOE, SRGN	98	157	19113	6.21117	0.991084	0.230658	11.6176
UP_SEQ_FEATURE	repeat:Annexin 1	4	3.92157	4.42906e-05	ANXA8, ANXA8L1, ANXA8L2, ANXA3	98	14	19113	55.723	0.024455	0.00493955	0.0647604
UP_SEQ_FEATURE	repeat:Annexin 2	4	3.92157	4.42906e-05	ANXA8, ANXA8L1, ANXA8L2, ANXA3	98	14	19113	55.723	0.024455	0.00493955	0.0647604
UP_SEQ_FEATURE	repeat:Annexin 3	4	3.92157	4.42906e-05	ANXA8, ANXA8L1, ANXA8L2, ANXA3	98	14	19113	55.723	0.024455	0.00493955	0.0647604
UP_SEQ_FEATURE	repeat:Annexin 4	4	3.92157	4.42906e-05	ANXA8, ANXA8L1, ANXA8L2, ANXA3	98	14	19113	55.723	0.024455	0.00493955	0.0647604
UP_SEQ_FEATURE	domain:Thyroglobulin type-1	3	2.94118	0.00191723	EPCAM, NID1, IGFBP3	98	13	19113	45.0071	0.657937	0.0929192	2.76783
UP_SEQ_FEATURE	glycosylation site:O-linked (Xyl...) (glycosaminoglycan)	3	2.94118	0.00222939	TGFBR3, DCN, SRGN	98	14	19113	41.7923	0.712812	0.0987461	3.21167
UP_SEQ_FEATURE	site:Reactive bond	5	4.90196	7.9176e-05	SERPINB9, COL6A3, TFPI, SPINK1, SERPINA1	98	45	19113	21.6701	0.0432959	0.00734972	0.115741
UP_SEQ_FEATURE	glycosylation site:O-linked (GalNAc...)	8	7.84314	4.2912e-07	COL18A1, INS-IGF2, APOE, APOC3, TFPI, IGF2, HGF, AHSG, FN1	98	92	19113	16.9592	0.000239849	7.99561e-05	0.000627635
UP_SEQ_FEATURE	domain:EGF-like 5; calcium-binding	4	3.92157	0.000868723	FBLN1, NPNT, NID1, NID2	98	37	19113	21.0844	0.384812	0.0525497	1.26311
UP_SEQ_FEATURE	domain:EGF-like 3; calcium-binding	4	3.92157	0.000868723	FBLN1, THBD, NID1, NID2	98	37	19113	21.0844	0.384812	0.0525497	1.26311
UP_SEQ_FEATURE	domain:EGF-like 1	5	4.90196	0.00326736	FBLN1, THBD, NPNT, NID1, NID2	98	120	19113	8.12628	0.839497	0.122497	4.67395
UP_SEQ_FEATURE	metal ion-binding site:Iron (heme distal ligand)	3	2.94118	0.00162765	HBG1, HBG2, HBE1	98	12	19113	48.7577	0.597716	0.0870367	2.3544
UP_SEQ_FEATURE	metal ion-binding site:Iron (heme proximal ligand)	3	2.94118	0.00256389	HBG1, HBG2, HBE1	98	15	19113	39.0061	0.761897	0.104514	3.68517

## Sheet: Table S6C_T_10uM_Up
Category	Term	Count	%	PValue	Genes	List Total	Pop Hits	Pop Total	Fold Enrichment	Bonferroni	Benjamini	FDR
GOTERM_BP_FAT	GO:0051047~positive regulation of secretion	3	14.2857	0.00402771	CARTPT, TAC1, HTR2C	13	109	13528	28.6408	0.703227	0.703227	5.25285
GOTERM_BP_FAT	GO:0051969~regulation of transmission of nerve impulse	3	14.2857	0.00720691	CARTPT, TAC1, HTR2C	13	147	13528	21.237	0.886634	0.51602	9.21752
GOTERM_BP_FAT	GO:0031644~regulation of neurological system process	3	14.2857	0.00778629	CARTPT, TAC1, HTR2C	13	153	13528	20.4042	0.904902	0.44468	9.92329
GOTERM_CC_FAT	GO:0044421~extracellular region part	9	42.8571	3.92959e-06	SPOCK3, IGFBP7, TNC, CARTPT, COL12A1, TAC1, EPYC, TFPI2, IL13RA2	16	960	12782	7.48945	0.000192532	0.000192532	0.00376762
GOTERM_CC_FAT	GO:0005576~extracellular region	11	52.381	1.26713e-05	SPOCK3, IGFBP7, TNC, GLIPR1, CARTPT, COL12A1, TAC1, EPYC, TFPI2, ABO, IL13RA2	16	2010	12782	4.37195	0.000620705	0.0003104	0.0121485
GOTERM_CC_FAT	GO:0005578~proteinaceous extracellular matrix	5	23.8095	0.000422949	SPOCK3, TNC, COL12A1, EPYC, TFPI2	16	320	12782	12.4824	0.0205155	0.00688581	0.404786
GOTERM_CC_FAT	GO:0031012~extracellular matrix	5	23.8095	0.00056233	SPOCK3, TNC, COL12A1, EPYC, TFPI2	16	345	12782	11.5779	0.0271856	0.0068668	0.53786
SP_PIR_KEYWORDS	Secreted	9	42.8571	0.000167079	SPOCK3, IGFBP7, TNC, CARTPT, COL12A1, TAC1, EPYC, TFPI2, ABO	21	1689	19235	4.88074	0.0116283	0.0116283	0.172777
SP_PIR_KEYWORDS	extracellular matrix	4	19.0476	0.00189149	SPOCK3, TNC, COL12A1, EPYC	21	241	19235	15.2025	0.124123	0.064117	1.94031
SP_PIR_KEYWORDS	signal	10	47.619	0.00311478	SPOCK3, IGFBP7, TNC, GLIPR1, CARTPT, COL12A1, TAC1, EPYC, TFPI2, IL13RA2	21	3250	19235	2.81832	0.196176	0.0702054	3.177
SP_PIR_KEYWORDS	disulfide bond	9	42.8571	0.00640306	SPOCK3, IGFBP7, TNC, CARTPT, COL12A1, EPYC, TFPI2, HTR2C, IL13RA2	21	2924	19235	2.81928	0.362152	0.0860058	6.43177
SP_PIR_KEYWORDS	glycoprotein	11	52.381	0.0062683	SPOCK3, IGFBP7, TNC, SCN2A, COL12A1, TSPAN8, EPYC, TFPI2, HTR2C, ABO, IL13RA2	21	4318	19235	2.33337	0.356068	0.104202	6.30035
SP_PIR_KEYWORDS	disulfide bond	9	42.8571	0.00640306	SPOCK3, IGFBP7, TNC, CARTPT, COL12A1, EPYC, TFPI2, HTR2C, IL13RA2	21	2924	19235	2.81928	0.362152	0.0860058	6.43177
SP_PIR_KEYWORDS	glycoprotein	11	52.381	0.0062683	SPOCK3, IGFBP7, TNC, SCN2A, COL12A1, TSPAN8, EPYC, TFPI2, HTR2C, ABO, IL13RA2	21	4318	19235	2.33337	0.356068	0.104202	6.30035
UP_SEQ_FEATURE	signal peptide	10	47.619	0.00325815	SPOCK3, IGFBP7, TNC, GLIPR1, CARTPT, COL12A1, TAC1, EPYC, TFPI2, IL13RA2	21	3250	19113	2.80044	0.341456	0.341456	3.71906
UP_SEQ_FEATURE	domain:Fibronectin type-III 3	3	14.2857	0.00336473	TNC, COL12A1, IL13RA2	21	83	19113	32.8967	0.350409	0.194028	3.83855
UP_SEQ_FEATURE	domain:Fibronectin type-III 2	3	14.2857	0.00805053	TNC, COL12A1, IL13RA2	21	130	19113	21.0033	0.644645	0.291694	8.96006
UP_SEQ_FEATURE	domain:Fibronectin type-III 1	3	14.2857	0.00817024	TNC, COL12A1, IL13RA2	21	131	19113	20.843	0.650092	0.23089	9.08757

## Sheet: Table S6D_T_10uM_down
Category	Term	Count	%	PValue	Genes	List Total	Pop Hits	Pop Total	Fold Enrichment	Bonferroni	Benjamini	FDR
GOTERM_BP_FAT	GO:0007507~heart development	18	10.6509	1.52417e-10	RBP4, NRP1, TBX3, ERBB3, SOX6, ISL1, EDNRA, TDGF3, SALL4, HAND1, PKP2, GATA6, TDGF1, TGFBR3, PTCH1, ADAMTS1, PCSK5, MYH10, SMARCA4	147	215	13528	7.7046	2.60175e-07	2.60175e-07	2.57204e-07
GOTERM_BP_FAT	GO:0043009~chordate embryonic development	19	11.2426	1.73362e-08	RBP4, TBX3, NASP, LEF1, CDH1, EDNRA, TDGF3, APOB, SALL4, HAND1, GATA6, TDGF1, ANKRD11, HOXA9, TGFBR3, PTCH1, PCSK5, MYH10, SMARCA4, HECTD1	147	331	13528	5.28253	2.95925e-05	9.86426e-06	2.9255e-05
GOTERM_BP_FAT	GO:0009792~embryonic development ending in birth or egg hatching	19	11.2426	1.99277e-08	RBP4, TBX3, NASP, LEF1, CDH1, EDNRA, TDGF3, APOB, SALL4, HAND1, GATA6, TDGF1, ANKRD11, HOXA9, TGFBR3, PTCH1, PCSK5, MYH10, SMARCA4, HECTD1	147	334	13528	5.23508	3.40159e-05	8.50409e-06	3.36281e-05
GOTERM_BP_FAT	GO:0001701~in utero embryonic development	13	7.69231	4.38359e-07	TBX3, NASP, CDH1, EDNRA, TDGF3, APOB, SALL4, HAND1, GATA6, TDGF1, ANKRD11, TGFBR3, MYH10, SMARCA4	147	176	13528	6.79746	0.000747999	0.000106891	0.000739732
GOTERM_BP_FAT	GO:0007155~cell adhesion	24	14.2012	1.64831e-06	HAPLN1, F11R, FLRT2, NRP1, COL21A1, NPNT, LEF1, CDH1, NID1, NID2, APOA4, ITGA9, EZR, DSG2, PKP2, FREM2, RAC1, PKP4, COL6A3, COL6A1, DSC2, LAMB1, FN1, SPP1	147	700	13528	3.15522	0.00280971	0.000200956	0.0027815
GOTERM_BP_FAT	GO:0022610~biological adhesion	24	14.2012	1.68883e-06	HAPLN1, F11R, FLRT2, NRP1, COL21A1, NPNT, LEF1, CDH1, NID1, NID2, APOA4, ITGA9, EZR, DSG2, PKP2, FREM2, RAC1, PKP4, COL6A3, COL6A1, DSC2, LAMB1, FN1, SPP1	147	701	13528	3.15072	0.00287868	0.00019217	0.00284988
GOTERM_BP_FAT	GO:0003007~heart morphogenesis	8	4.73373	1.32684e-05	RBP4, HAND1, TBX3, TGFBR3, ADAMTS1, PTCH1, ISL1, SMARCA4	147	73	13528	10.0852	0.0223948	0.000838512	0.0223882
GOTERM_BP_FAT	GO:0060347~heart trabecula formation	4	2.36686	2.40514e-05	RBP4, TGFBR3, ADAMTS1, SMARCA4	147	6	13528	61.3515	0.0402249	0.0011398	0.0405793
GOTERM_BP_FAT	GO:0060343~trabecula formation	4	2.36686	6.6282e-05	RBP4, TGFBR3, ADAMTS1, SMARCA4	147	8	13528	46.0136	0.106981	0.00235446	0.111793
GOTERM_BP_FAT	GO:0007389~pattern specification process	14	8.28402	6.322e-06	NRP1, MLL, TBX3, FST, LEF1, EDNRA, TDGF3, TDGF1, VEGFA, HOXA10, HOXA9, PTCH1, SP8, PCSK5, PITX2	147	267	13528	4.8254	0.0107337	0.000490411	0.0106679
GOTERM_BP_FAT	GO:0035108~limb morphogenesis	9	5.32544	1.13574e-05	SALL4, TBX3, HOXA10, HOXA9, LEF1, PTCH1, SP8, PCSK5, SMARCA4	147	99	13528	8.36611	0.0192005	0.000775188	0.019164
GOTERM_BP_FAT	GO:0035107~appendage morphogenesis	9	5.32544	1.13574e-05	SALL4, TBX3, HOXA10, HOXA9, LEF1, PTCH1, SP8, PCSK5, SMARCA4	147	99	13528	8.36611	0.0192005	0.000775188	0.019164
GOTERM_BP_FAT	GO:0060173~limb development	9	5.32544	1.52113e-05	SALL4, TBX3, HOXA10, HOXA9, LEF1, PTCH1, SP8, PCSK5, SMARCA4	147	103	13528	8.04121	0.0256317	0.000865157	0.0256662
GOTERM_BP_FAT	GO:0048736~appendage development	9	5.32544	1.52113e-05	SALL4, TBX3, HOXA10, HOXA9, LEF1, PTCH1, SP8, PCSK5, SMARCA4	147	103	13528	8.04121	0.0256317	0.000865157	0.0256662
GOTERM_BP_FAT	GO:0030326~embryonic limb morphogenesis	8	4.73373	4.19644e-05	SALL4, TBX3, HOXA10, HOXA9, LEF1, PTCH1, SP8, SMARCA4	147	87	13528	8.46227	0.0691292	0.00170414	0.0707918
GOTERM_BP_FAT	GO:0035113~embryonic appendage morphogenesis	8	4.73373	4.19644e-05	SALL4, TBX3, HOXA10, HOXA9, LEF1, PTCH1, SP8, SMARCA4	147	87	13528	8.46227	0.0691292	0.00170414	0.0707918
GOTERM_BP_FAT	GO:0048598~embryonic morphogenesis	12	7.10059	0.000496531	RBP4, TBX3, LEF1, TDGF3, SALL4, HAND1, TDGF1, HOXA10, HOXA9, PTCH1, SP8, HECTD1, SMARCA4	147	307	13528	3.59715	0.571639	0.00958771	0.834607
GOTERM_BP_FAT	GO:0003002~regionalization	9	5.32544	0.00133356	TDGF3, MLL, TBX3, TDGF1, HOXA10, HOXA9, LEF1, PTCH1, SP8, PCSK5	147	197	13528	4.20429	0.897501	0.0214606	2.22672
GOTERM_BP_FAT	GO:0009952~anterior/posterior pattern formation	7	4.14201	0.00409457	TDGF3, MLL, TBX3, TDGF1, HOXA10, HOXA9, LEF1, PCSK5	147	140	13528	4.60136	0.999092	0.0524497	6.68956
GOTERM_BP_FAT	GO:0065005~protein-lipid complex assembly	7	4.14201	1.2487e-09	APOA4, APOA2, APOB, APOA1, APOE, APOC3, APOC1	147	12	13528	53.6825	2.13153e-06	1.06576e-06	2.10719e-06
GOTERM_BP_FAT	GO:0034377~plasma lipoprotein particle assembly	7	4.14201	1.2487e-09	APOA4, APOA2, APOB, APOA1, APOE, APOC3, APOC1	147	12	13528	53.6825	2.13153e-06	1.06576e-06	2.10719e-06
GOTERM_BP_FAT	GO:0033700~phospholipid efflux	6	3.5503	3.29851e-08	APOA4, APOA2, APOA1, APOE, APOC3, APOC1	147	10	13528	55.2163	5.63041e-05	1.12611e-05	5.56627e-05
GOTERM_BP_FAT	GO:0010873~positive regulation of cholesterol esterification	5	2.95858	4.44384e-07	APOA4, APOA2, APOA1, APOE, APOC1	147	7	13528	65.7337	0.000758276	9.4816e-05	0.0007499
GOTERM_BP_FAT	GO:0034381~lipoprotein particle clearance	6	3.5503	5.42616e-07	APOA2, APOB, APOA1, APOE, APOC3, APOC1	147	16	13528	34.5102	0.000925817	0.000102911	0.000915666
GOTERM_BP_FAT	GO:0045834~positive regulation of lipid metabolic process	8	4.73373	5.557e-07	APOA4, APOA2, APOA1, INS-IGF2, APOE, RAC1, APOC1, FABP1, IGF2	147	46	13528	16.0047	0.00094813	9.48535e-05	0.000937745
GOTERM_BP_FAT	GO:0010872~regulation of cholesterol esterification	5	2.95858	8.81309e-07	APOA4, APOA2, APOA1, APOE, APOC1	147	8	13528	57.517	0.00150326	0.000136754	0.00148721
GOTERM_BP_FAT	GO:0033344~cholesterol efflux	6	3.5503	1.40725e-06	APOA4, APOA2, APOA1, APOE, APOC3, APOC1	147	19	13528	29.0612	0.00239929	0.000184766	0.00237472
GOTERM_BP_FAT	GO:0032371~regulation of sterol transport	6	3.5503	1.86007e-06	APOA4, APOA2, APOA1, APOE, APOC3, APOC1	147	20	13528	27.6082	0.00317011	0.000198427	0.00313884
GOTERM_BP_FAT	GO:0032374~regulation of cholesterol transport	6	3.5503	1.86007e-06	APOA4, APOA2, APOA1, APOE, APOC3, APOC1	147	20	13528	27.6082	0.00317011	0.000198427	0.00313884
GOTERM_BP_FAT	GO:0034367~macromolecular complex remodeling	6	3.5503	1.86007e-06	APOA4, APOA2, APOB, APOE, APOC3, APOC1	147	20	13528	27.6082	0.00317011	0.000198427	0.00313884
GOTERM_BP_FAT	GO:0034368~protein-lipid complex remodeling	6	3.5503	1.86007e-06	APOA4, APOA2, APOB, APOE, APOC3, APOC1	147	20	13528	27.6082	0.00317011	0.000198427	0.00313884
GOTERM_BP_FAT	GO:0034369~plasma lipoprotein particle remodeling	6	3.5503	1.86007e-06	APOA4, APOA2, APOB, APOE, APOC3, APOC1	147	20	13528	27.6082	0.00317011	0.000198427	0.00313884
GOTERM_BP_FAT	GO:0030301~cholesterol transport	7	4.14201	2.51539e-06	APOA4, APOA2, APOB, APOA1, APOE, APOC3, APOC1	147	37	13528	17.4106	0.00428457	0.000238515	0.00424466
GOTERM_BP_FAT	GO:0015918~sterol transport	7	4.14201	2.51539e-06	APOA4, APOA2, APOB, APOA1, APOE, APOC3, APOC1	147	37	13528	17.4106	0.00428457	0.000238515	0.00424466
GOTERM_BP_FAT	GO:0019216~regulation of lipid metabolic process	10	5.91716	3.31694e-06	APOA4, APOA2, APOB, APOA1, INS-IGF2, APOE, APOC3, RAC1, APOC1, FABP1, IGF2	147	112	13528	8.21672	0.00564602	0.000297957	0.00559722
GOTERM_BP_FAT	GO:0034375~high-density lipoprotein particle remodeling	5	2.95858	6.02567e-06	APOA4, APOA2, APOE, APOC3, APOC1	147	12	13528	38.3447	0.0102331	0.000489683	0.0101679
GOTERM_BP_FAT	GO:0050994~regulation of lipid catabolic process	6	3.5503	7.49059e-06	APOA4, APOA2, INS-IGF2, APOC3, APOC1, FABP1, IGF2	147	26	13528	21.237	0.0127051	0.00055578	0.0126397
GOTERM_BP_FAT	GO:0045940~positive regulation of steroid metabolic process	5	2.95858	1.19819e-05	APOA4, APOA2, APOA1, APOE, APOC1	147	14	13528	32.8669	0.0202455	0.000786354	0.0202177
GOTERM_BP_FAT	GO:0032368~regulation of lipid transport	6	3.5503	1.56733e-05	APOA4, APOA2, APOA1, APOE, APOC3, APOC1	147	30	13528	18.4054	0.0263999	0.000862679	0.0264456
GOTERM_BP_FAT	GO:0055088~lipid homeostasis	7	4.14201	1.72103e-05	APOA4, APOA2, APOB, APOA1, INS-IGF2, APOE, APOC3, IGF2	147	51	13528	12.6312	0.0289509	0.000917648	0.0290386
GOTERM_BP_FAT	GO:0043691~reverse cholesterol transport	5	2.95858	2.1422e-05	APOA4, APOA2, APOA1, APOE, APOC3	147	16	13528	28.7585	0.0359072	0.00107494	0.0361436
GOTERM_BP_FAT	GO:0015914~phospholipid transport	6	3.5503	2.54319e-05	APOA4, APOA2, APOA1, APOE, APOC3, APOC1	147	33	13528	16.7322	0.042484	0.00114179	0.042908
GOTERM_BP_FAT	GO:0019218~regulation of steroid metabolic process	6	3.5503	3.93588e-05	APOA4, APOA2, APOB, APOA1, APOE, APOC1	147	36	13528	15.3379	0.0649795	0.00167826	0.0663977
GOTERM_BP_FAT	GO:0055092~sterol homeostasis	6	3.5503	5.15027e-05	APOA4, APOA2, APOB, APOA1, APOE, APOC3	147	38	13528	14.5306	0.0841635	0.00199613	0.0868759
GOTERM_BP_FAT	GO:0042632~cholesterol homeostasis	6	3.5503	5.15027e-05	APOA4, APOA2, APOB, APOA1, APOE, APOC3	147	38	13528	14.5306	0.0841635	0.00199613	0.0868759
GOTERM_BP_FAT	GO:0006641~triglyceride metabolic process	6	3.5503	9.45806e-05	APOA4, APOA2, APOB, APOE, APOC3, APOC1	147	43	13528	12.841	0.149097	0.00298547	0.159486
GOTERM_BP_FAT	GO:0046890~regulation of lipid biosynthetic process	6	3.5503	0.000117983	APOA4, APOB, INS-IGF2, APOE, APOC3, APOC1, IGF2	147	45	13528	12.2703	0.182422	0.00346655	0.198912
GOTERM_BP_FAT	GO:0051129~negative regulation of cellular component organization	9	5.32544	0.000150781	APOA2, NRP1, APOA1, APOC3, MAP1B, RAC1, APOC1, TGFBR3, SPP1	147	142	13528	5.83271	0.226943	0.00421083	0.254141
GOTERM_BP_FAT	GO:0006869~lipid transport	9	5.32544	0.0001742	APOA4, RBP4, APOA2, APOB, APOA1, APOE, APOC3, APOC1, FABP1	147	145	13528	5.71203	0.257242	0.00470927	0.293557
GOTERM_BP_FAT	GO:0006639~acylglycerol metabolic process	6	3.5503	0.000177879	APOA4, APOA2, APOB, APOE, APOC3, APOC1	147	49	13528	11.2686	0.261893	0.00459043	0.299749
GOTERM_BP_FAT	GO:0006638~neutral lipid metabolic process	6	3.5503	0.000195941	APOA4, APOA2, APOB, APOE, APOC3, APOC1	147	50	13528	11.0433	0.284307	0.00498015	0.330138
GOTERM_BP_FAT	GO:0006662~glycerol ether metabolic process	6	3.5503	0.000215368	APOA4, APOA2, APOB, APOE, APOC3, APOC1	147	51	13528	10.8267	0.307656	0.00539236	0.362815
GOTERM_BP_FAT	GO:0045833~negative regulation of lipid metabolic process	5	2.95858	0.000217912	APOA2, INS-IGF2, APOE, APOC3, APOC1, IGF2	147	28	13528	16.4334	0.310657	0.00537703	0.367093
GOTERM_BP_FAT	GO:0042157~lipoprotein metabolic process	7	4.14201	0.000222203	APOA4, APOA2, APOB, APOA1, APOE, APOC3, APOC1	147	80	13528	8.05238	0.315689	0.00540452	0.374309
GOTERM_BP_FAT	GO:0018904~organic ether metabolic process	6	3.5503	0.00025859	APOA4, APOA2, APOB, APOE, APOC3, APOC1	147	53	13528	10.4182	0.35691	0.00602929	0.435479
GOTERM_BP_FAT	GO:0010876~lipid localization	9	5.32544	0.000300064	APOA4, RBP4, APOA2, APOB, APOA1, APOE, APOC3, APOC1, FABP1	147	157	13528	5.27545	0.400875	0.00671793	0.505156
GOTERM_BP_FAT	GO:0050995~negative regulation of lipid catabolic process	4	2.36686	0.000325345	APOA2, INS-IGF2, APOC3, APOC1, IGF2	147	13	13528	28.3161	0.426188	0.0070959	0.547607
GOTERM_BP_FAT	GO:0010903~negative regulation of very-low-density lipoprotein particle remodeling	3	1.77515	0.000344599	APOA2, APOA1, APOC3	147	3	13528	92.0272	0.444747	0.00723704	0.579926
GOTERM_BP_FAT	GO:0051241~negative regulation of multicellular organismal process	9	5.32544	0.00040148	RBP4, APOA1, INS-IGF2, APOE, VEGFA, APOC3, APOC1, IGF2, PTCH1, AHSG	147	164	13528	5.05027	0.496144	0.00812709	0.675347
GOTERM_BP_FAT	GO:0048878~chemical homeostasis	16	9.46746	0.00042305	RBP4, PLP1, INS-IGF2, F2RL1, IGF2, FZD2, SLC9A3R1, APOA4, EDNRA, APOA2, APOB, APOA1, APOE, VEGFA, APOC3, PTCH1, SLC40A1	147	512	13528	2.87585	0.514366	0.00846163	0.711509
GOTERM_BP_FAT	GO:0008203~cholesterol metabolic process	7	4.14201	0.000474339	APOA4, APOA2, APOB, APOA1, APOE, APOC3, APOC1	147	92	13528	7.00207	0.555092	0.00926587	0.797445
GOTERM_BP_FAT	GO:0031329~regulation of cellular catabolic process	6	3.5503	0.000500295	APOA4, INS-IGF2, APOE, APOC3, APOC1, FABP1, IGF2	147	61	13528	9.05186	0.574384	0.00955204	0.840909
GOTERM_BP_FAT	GO:0009894~regulation of catabolic process	7	4.14201	0.000595338	APOA4, APOA2, INS-IGF2, APOE, APOC3, APOC1, FABP1, IGF2	147	96	13528	6.71032	0.638157	0.0111086	0.999905
GOTERM_BP_FAT	GO:0051051~negative regulation of transport	8	4.73373	0.000647023	APOA2, APOA1, ERBB3, INS-IGF2, FST, APOC3, RAC1, APOC1, IGF2	147	135	13528	5.45346	0.668731	0.0118096	1.08627
GOTERM_BP_FAT	GO:0032488~Cdc42 protein signal transduction	3	1.77515	0.00068431	APOA1, APOE, APOC3	147	4	13528	69.0204	0.689172	0.0122248	1.14853
GOTERM_BP_FAT	GO:0016125~sterol metabolic process	7	4.14201	0.000778838	APOA4, APOA2, APOB, APOA1, APOE, APOC3, APOC1	147	101	13528	6.37812	0.735521	0.0137586	1.3062
GOTERM_BP_FAT	GO:0034382~chylomicron remnant clearance	3	1.77515	0.00113244	APOE, APOC3, APOC1	147	5	13528	55.2163	0.855455	0.0193474	1.89391
GOTERM_BP_FAT	GO:0034380~high-density lipoprotein particle assembly	3	1.77515	0.00113244	APOA2, APOA1, APOE	147	5	13528	55.2163	0.855455	0.0193474	1.89391
GOTERM_BP_FAT	GO:0010901~regulation of very-low-density lipoprotein particle remodeling	3	1.77515	0.00113244	APOA2, APOA1, APOC3	147	5	13528	55.2163	0.855455	0.0193474	1.89391
GOTERM_BP_FAT	GO:0030300~regulation of intestinal cholesterol absorption	3	1.77515	0.00168663	APOA4, APOA2, APOA1	147	6	13528	46.0136	0.94395	0.0260894	2.80841
GOTERM_BP_FAT	GO:0034384~high-density lipoprotein particle clearance	3	1.77515	0.00168663	APOA2, APOA1, APOE	147	6	13528	46.0136	0.94395	0.0260894	2.80841
GOTERM_BP_FAT	GO:0034379~very-low-density lipoprotein particle assembly	3	1.77515	0.00168663	APOB, APOC3, APOC1	147	6	13528	46.0136	0.94395	0.0260894	2.80841
GOTERM_BP_FAT	GO:0045922~negative regulation of fatty acid metabolic process	3	1.77515	0.00168663	INS-IGF2, APOC3, APOC1, IGF2	147	6	13528	46.0136	0.94395	0.0260894	2.80841
GOTERM_BP_FAT	GO:0009896~positive regulation of catabolic process	5	2.95858	0.00189237	APOA4, APOA2, INS-IGF2, APOE, FABP1, IGF2	147	49	13528	9.39053	0.960574	0.0284563	3.14587
GOTERM_BP_FAT	GO:0019217~regulation of fatty acid metabolic process	5	2.95858	0.00189237	APOA4, INS-IGF2, APOC3, APOC1, FABP1, IGF2	147	49	13528	9.39053	0.960574	0.0284563	3.14587
GOTERM_BP_FAT	GO:0060192~negative regulation of lipase activity	3	1.77515	0.00234458	APOA2, APOC3, APOC1	147	7	13528	39.4402	0.98181	0.0333866	3.88371
GOTERM_BP_FAT	GO:0032372~negative regulation of sterol transport	3	1.77515	0.00234458	APOA2, APOC3, APOC1	147	7	13528	39.4402	0.98181	0.0333866	3.88371
GOTERM_BP_FAT	GO:0032375~negative regulation of cholesterol transport	3	1.77515	0.00234458	APOA2, APOC3, APOC1	147	7	13528	39.4402	0.98181	0.0333866	3.88371
GOTERM_BP_FAT	GO:0010565~regulation of cellular ketone metabolic process	5	2.95858	0.00330116	APOA4, INS-IGF2, APOC3, APOC1, FABP1, IGF2	147	57	13528	8.07256	0.996463	0.0444989	5.42713
GOTERM_BP_FAT	GO:0034370~triglyceride-rich lipoprotein particle remodeling	3	1.77515	0.00396268	APOA4, APOA2, APOE	147	9	13528	30.6757	0.998861	0.0515736	6.48081
GOTERM_BP_FAT	GO:0044269~glycerol ether catabolic process	3	1.77515	0.00396268	APOA2, APOB, APOC3	147	9	13528	30.6757	0.998861	0.0515736	6.48081
GOTERM_BP_FAT	GO:0046461~neutral lipid catabolic process	3	1.77515	0.00396268	APOA2, APOB, APOC3	147	9	13528	30.6757	0.998861	0.0515736	6.48081
GOTERM_BP_FAT	GO:0046464~acylglycerol catabolic process	3	1.77515	0.00396268	APOA2, APOB, APOC3	147	9	13528	30.6757	0.998861	0.0515736	6.48081
GOTERM_BP_FAT	GO:0043933~macromolecular complex subunit organization	17	10.0592	0.00417644	MLL, NASP, APOC1, CDH1, SLC9A3R1, APOA4, IGF1R, FGG, APOA2, APOB, APOA1, FGA, FGB, APOE, APOC3, RAC1, KPNB1	147	710	13528	2.20347	0.999211	0.0526835	6.81892
GOTERM_BP_FAT	GO:0065003~macromolecular complex assembly	16	9.46746	0.00546781	MLL, APOC1, CDH1, SLC9A3R1, APOA4, IGF1R, FGG, APOA2, APOB, APOA1, FGA, FGB, APOE, APOC3, RAC1, KPNB1	147	665	13528	2.21419	0.999914	0.0669786	8.83718
GOTERM_BP_FAT	GO:0044058~regulation of digestive system process	3	1.77515	0.00596901	APOA4, APOA2, APOA1	147	11	13528	25.0983	0.999964	0.0718815	9.60936
GOTERM_BP_FAT	GO:0008202~steroid metabolic process	8	4.73373	0.00631687	APOA4, AFP, APOA2, APOB, APOA1, APOE, APOC3, APOC1	147	202	13528	3.64464	0.99998	0.0748699	10.1417
GOTERM_BP_FAT	GO:0031331~positive regulation of cellular catabolic process	4	2.36686	0.00677589	APOA4, INS-IGF2, APOE, FABP1, IGF2	147	36	13528	10.2252	0.999991	0.0790142	10.8396
GOTERM_BP_FAT	GO:0046503~glycerolipid catabolic process	3	1.77515	0.00711236	APOA2, APOB, APOC3	147	12	13528	23.0068	0.999995	0.082226	11.3479
GOTERM_BP_FAT	GO:0009895~negative regulation of catabolic process	4	2.36686	0.00731624	APOA2, INS-IGF2, APOC3, APOC1, IGF2	147	37	13528	9.94889	0.999996	0.0839235	11.6546
GOTERM_BP_FAT	GO:0007266~Rho protein signal transduction	4	2.36686	0.00788141	APOA1, APOE, APOC3, ARHGAP29	147	38	13528	9.68707	0.999999	0.0883624	12.4996
GOTERM_BP_FAT	GO:0046486~glycerolipid metabolic process	7	4.14201	0.00826439	APOA4, APOA2, APOB, APOA1, APOE, APOC3, APOC1	147	162	13528	3.97648	0.999999	0.0918692	13.0678
GOTERM_BP_FAT	GO:0050996~positive regulation of lipid catabolic process	3	1.77515	0.00834636	APOA4, APOA2, FABP1	147	13	13528	21.237	0.999999	0.0921436	13.189
GOTERM_BP_FAT	GO:0042060~wound healing	14	8.28402	1.44919e-07	INS-IGF2, ERBB3, F2RL1, IGF2, FGG, ANXA8, THBD, FGA, FGB, TFPI, DSP, SERPINA1, ANXA8L2, MYH10, FN1	147	191	13528	6.74545	0.000247346	4.12286e-05	0.000244552
GOTERM_BP_FAT	GO:0009611~response to wounding	21	12.426	1.04174e-06	F11R, NRP1, ERBB3, INS-IGF2, F2RL1, MAP1B, IGF2, AHSG, FGG, APOA2, ANXA8, THBD, FGA, FGB, RAC1, TFPI, DSP, SERPINA1, ANXA8L2, MYH10, FN1, SPP1	147	530	13528	3.64636	0.00177667	0.000148177	0.00175793
GOTERM_BP_FAT	GO:0050817~coagulation	9	5.32544	1.41576e-05	FGG, ANXA8, THBD, FGA, FGB, F2RL1, TFPI, ANXA8L2, SERPINA1	147	102	13528	8.12005	0.0238776	0.000862744	0.0238885
GOTERM_BP_FAT	GO:0007596~blood coagulation	9	5.32544	1.41576e-05	FGG, ANXA8, THBD, FGA, FGB, F2RL1, TFPI, ANXA8L2, SERPINA1	147	102	13528	8.12005	0.0238776	0.000862744	0.0238885
GOTERM_BP_FAT	GO:0007599~hemostasis	9	5.32544	2.15238e-05	FGG, ANXA8, THBD, FGA, FGB, F2RL1, TFPI, ANXA8L2, SERPINA1	147	108	13528	7.66893	0.0360748	0.00104921	0.0363155
GOTERM_BP_FAT	GO:0050878~regulation of body fluid levels	9	5.32544	0.000143578	FGG, ANXA8, THBD, FGA, FGB, F2RL1, TFPI, ANXA8L2, SERPINA1	147	141	13528	5.87408	0.217377	0.00407674	0.242013
GOTERM_BP_FAT	GO:0010035~response to inorganic substance	9	5.32544	0.0017161	APOA4, FGG, APOB, FGA, FGB, APOE, MAP1B, LEF1, SERPINA1	147	205	13528	4.04022	0.946704	0.0263015	2.85682
GOTERM_BP_FAT	GO:0043933~macromolecular complex subunit organization	17	10.0592	0.00417644	MLL, NASP, APOC1, CDH1, SLC9A3R1, APOA4, IGF1R, FGG, APOA2, APOB, APOA1, FGA, FGB, APOE, APOC3, RAC1, KPNB1	147	710	13528	2.20347	0.999211	0.0526835	6.81892
GOTERM_BP_FAT	GO:0035295~tube development	12	7.10059	2.62446e-05	EDNRA, RBP4, NRP1, GPC3, HAND1, TBX3, GATA6, SALL1, VEGFA, PTCH1, PCSK5, HECTD1	147	220	13528	5.01967	0.0438115	0.00114806	0.0442788
GOTERM_BP_FAT	GO:0001944~vasculature development	12	7.10059	8.69029e-05	NRP1, TBX3, EFNB2, EDNRA, TDGF3, APOB, HAND1, APOE, TDGF1, VEGFA, TGFBR3, FIGF, SMARCA4	147	251	13528	4.39971	0.13787	0.00284881	0.146548
GOTERM_BP_FAT	GO:0001568~blood vessel development	11	6.50888	0.000324539	EDNRA, TDGF3, APOB, NRP1, HAND1, TBX3, APOE, VEGFA, TDGF1, TGFBR3, FIGF, SMARCA4	147	245	13528	4.13183	0.425398	0.00716999	0.546254
GOTERM_BP_FAT	GO:0035239~tube morphogenesis	8	4.73373	0.000448567	EDNRA, NRP1, GPC3, HAND1, TBX3, VEGFA, PTCH1, HECTD1	147	127	13528	5.79699	0.535073	0.00886599	0.754272
GOTERM_BP_FAT	GO:0001763~morphogenesis of a branching structure	6	3.5503	0.00121112	EDNRA, TDGF3, NRP1, GPC3, TBX3, VEGFA, TDGF1	147	74	13528	7.46167	0.873642	0.0202732	2.02425
GOTERM_BP_FAT	GO:0048514~blood vessel morphogenesis	9	5.32544	0.00205629	EDNRA, TDGF3, APOB, NRP1, HAND1, APOE, VEGFA, TDGF1, FIGF, SMARCA4	147	211	13528	3.92533	0.970214	0.0306163	3.41395
GOTERM_BP_FAT	GO:0048754~branching morphogenesis of a tube	5	2.95858	0.00529524	EDNRA, NRP1, GPC3, TBX3, VEGFA	147	65	13528	7.07902	0.999884	0.0653977	8.56987
GOTERM_BP_FAT	GO:0015758~glucose transport	5	2.95858	0.00025067	EDNRA, PPBP, INS-IGF2, SLC2A3, SLC2A1, IGF2	147	29	13528	15.8668	0.348154	0.00592608	0.422167
GOTERM_BP_FAT	GO:0008645~hexose transport	5	2.95858	0.000286823	EDNRA, PPBP, INS-IGF2, SLC2A3, SLC2A1, IGF2	147	30	13528	15.3379	0.387176	0.00650776	0.482916
GOTERM_BP_FAT	GO:0015749~monosaccharide transport	5	2.95858	0.000326571	EDNRA, PPBP, INS-IGF2, SLC2A3, SLC2A1, IGF2	147	31	13528	14.8431	0.427388	0.00703271	0.549665
GOTERM_BP_FAT	GO:0008643~carbohydrate transport	6	3.5503	0.000500295	EDNRA, PPBP, INS-IGF2, SLC2A3, SLC2A14, SLC2A1, IGF2	147	61	13528	9.05186	0.574384	0.00955204	0.840909
GOTERM_BP_FAT	GO:0051270~regulation of cell motion	12	7.10059	7.68249e-06	NRP1, INS-IGF2, F2RL1, IGF2, TDGF3, IGF1R, ETS1, APOE, RAC1, TDGF1, VEGFA, TGFBR3, LAMB1, IGFBP3	147	193	13528	5.7219	0.0130284	0.00054627	0.0129635
GOTERM_BP_FAT	GO:0030334~regulation of cell migration	10	5.91716	8.95791e-05	IGF1R, TDGF3, INS-IGF2, APOE, VEGFA, TDGF1, F2RL1, RAC1, TGFBR3, IGF2, LAMB1, IGFBP3	147	169	13528	5.4454	0.1418	0.00288109	0.151058
GOTERM_BP_FAT	GO:0040012~regulation of locomotion	10	5.91716	0.000235229	IGF1R, TDGF3, INS-IGF2, APOE, VEGFA, TDGF1, F2RL1, RAC1, TGFBR3, IGF2, LAMB1, IGFBP3	147	192	13528	4.79308	0.330741	0.00564014	0.396211
GOTERM_BP_FAT	GO:0051272~positive regulation of cell motion	7	4.14201	0.000664182	IGF1R, TDGF3, ETS1, INS-IGF2, VEGFA, TDGF1, F2RL1, IGF2, LAMB1	147	98	13528	6.57337	0.6783	0.0119928	1.11492
GOTERM_BP_FAT	GO:0030335~positive regulation of cell migration	6	3.5503	0.00274349	IGF1R, TDGF3, INS-IGF2, VEGFA, TDGF1, F2RL1, IGF2, LAMB1	147	89	13528	6.20408	0.990809	0.0377097	4.5302
GOTERM_BP_FAT	GO:0040017~positive regulation of locomotion	6	3.5503	0.00415565	IGF1R, TDGF3, INS-IGF2, VEGFA, TDGF1, F2RL1, IGF2, LAMB1	147	98	13528	5.63432	0.999182	0.0528172	6.78608
GOTERM_BP_FAT	GO:0014031~mesenchymal cell development	5	2.95858	0.00219516	EDNRA, TGFBR3, LEF1, HGF, ISL1	147	51	13528	9.02228	0.976512	0.0318212	3.64051
GOTERM_BP_FAT	GO:0048762~mesenchymal cell differentiation	5	2.95858	0.00219516	EDNRA, TGFBR3, LEF1, HGF, ISL1	147	51	13528	9.02228	0.976512	0.0318212	3.64051
GOTERM_BP_FAT	GO:0060485~mesenchyme development	5	2.95858	0.00235841	EDNRA, TGFBR3, LEF1, HGF, ISL1	147	52	13528	8.84877	0.982236	0.0333031	3.9062
GOTERM_BP_FAT	GO:0010033~response to organic substance	20	11.8343	0.000274892	RBP4, ERBB3, INS-IGF2, MAP1B, LEF1, CDH1, IGF2, AQP1, AHSG, EDNRA, AFP, IGF1R, APOA2, KRT19, APOB, THBD, APOE, TGFBR3, SERPINA1, PTCH1, SPP1	147	721	13528	2.55277	0.374563	0.00632188	0.462871
GOTERM_BP_FAT	GO:0009725~response to hormone stimulus	13	7.69231	0.000625616	RBP4, INS-IGF2, ERBB3, MAP1B, IGF2, AQP1, AHSG, IGF1R, APOA2, KRT19, TGFBR3, SERPINA1, PTCH1, SPP1	147	367	13528	3.25982	0.656394	0.0115444	1.05051
GOTERM_BP_FAT	GO:0009719~response to endogenous stimulus	13	7.69231	0.00146471	RBP4, INS-IGF2, ERBB3, MAP1B, IGF2, AQP1, AHSG, IGF1R, APOA2, KRT19, TGFBR3, SERPINA1, PTCH1, SPP1	147	405	13528	2.95396	0.918086	0.0231127	2.44318
GOTERM_BP_FAT	GO:0043627~response to estrogen stimulus	6	3.5503	0.00556563	APOA2, KRT19, MAP1B, SERPINA1, PTCH1, AQP1	147	105	13528	5.2587	0.999927	0.0676546	8.98836
GOTERM_BP_FAT	GO:0048738~cardiac muscle tissue development	6	3.5503	0.000364487	TDGF3, RBP4, HAND1, GATA6, TDGF1, TGFBR3, MYH10	147	57	13528	9.68707	0.463287	0.00756021	0.613299
GOTERM_BP_FAT	GO:0014706~striated muscle tissue development	7	4.14201	0.00182071	TDGF3, RBP4, HAND1, ERBB3, GATA6, TDGF1, TGFBR3, MYH10	147	119	13528	5.41337	0.955434	0.0276361	3.02847
GOTERM_BP_FAT	GO:0007517~muscle organ development	9	5.32544	0.00205629	TDGF3, RBP4, HAND1, ERBB3, GATA6, COL6A3, TDGF1, TGFBR3, SOX6, MYH10	147	211	13528	3.92533	0.970214	0.0306163	3.41395
GOTERM_BP_FAT	GO:0060537~muscle tissue development	7	4.14201	0.00233502	TDGF3, RBP4, HAND1, ERBB3, GATA6, TDGF1, TGFBR3, MYH10	147	125	13528	5.15352	0.98151	0.0335321	3.86817
GOTERM_BP_FAT	GO:0035051~cardiac cell differentiation	4	2.36686	0.00331044	TDGF3, GATA6, TDGF1, SOX6, MYH10	147	28	13528	13.1467	0.996519	0.0442724	5.44199
GOTERM_BP_FAT	GO:0032101~regulation of response to external stimulus	7	4.14201	0.00755121	EDNRA, INS-IGF2, APOE, VEGFA, F2RL1, IGF2, SPP1, AHSG	147	159	13528	4.05151	0.999998	0.0859344	12.0068
GOTERM_BP_FAT	GO:0051051~negative regulation of transport	8	4.73373	0.000647023	APOA2, APOA1, ERBB3, INS-IGF2, FST, APOC3, RAC1, APOC1, IGF2	147	135	13528	5.45346	0.668731	0.0118096	1.08627
GOTERM_BP_FAT	GO:0048261~negative regulation of receptor-mediated endocytosis	3	1.77515	0.00113244	APOC3, RAC1, APOC1	147	5	13528	55.2163	0.855455	0.0193474	1.89391
GOTERM_BP_FAT	GO:0031328~positive regulation of cellular biosynthetic process	22	13.0178	1.4202e-05	MLL, TBX3, INS-IGF2, MORF4L2, LEF1, IGF2, SOX6, ISL1, APOA4, PLAGL1, TDGF3, IGF1R, APOA2, SALL4, HAND1, CSRNP3, GATA6, ETS1, APOE, VEGFA, TDGF1, TCF4, RBM15, SMARCA4	147	685	13528	2.95562	0.0239514	0.000835614	0.0239633
GOTERM_BP_FAT	GO:0009891~positive regulation of biosynthetic process	22	13.0178	1.765e-05	MLL, TBX3, INS-IGF2, MORF4L2, LEF1, IGF2, SOX6, ISL1, APOA4, PLAGL1, TDGF3, IGF1R, APOA2, SALL4, HAND1, CSRNP3, GATA6, ETS1, APOE, VEGFA, TDGF1, TCF4, RBM15, SMARCA4	147	695	13528	2.91309	0.0296794	0.000912577	0.0297803
GOTERM_BP_FAT	GO:0045935~positive regulation of nucleobase, nucleoside, nucleotide and nucleic acid metabolic process	20	11.8343	4.1518e-05	MLL, TBX3, INS-IGF2, MORF4L2, LEF1, IGF2, SOX6, ISL1, PLAGL1, TDGF3, IGF1R, SALL4, HAND1, CSRNP3, GATA6, ETS1, APOE, VEGFA, TDGF1, TCF4, RBM15, SMARCA4	147	624	13528	2.94959	0.0684195	0.00172711	0.0700389
GOTERM_BP_FAT	GO:0045944~positive regulation of transcription from RNA polymerase II promoter	15	8.87574	4.83878e-05	MLL, MORF4L2, LEF1, SOX6, ISL1, PLAGL1, TDGF3, SALL4, HAND1, CSRNP3, ETS1, GATA6, VEGFA, TDGF1, RBM15, SMARCA4	147	371	13528	3.72078	0.0792806	0.00191909	0.0816236
GOTERM_BP_FAT	GO:0045893~positive regulation of transcription, DNA-dependent	17	10.0592	5.67522e-05	MLL, TBX3, MORF4L2, LEF1, SOX6, ISL1, PLAGL1, TDGF3, SALL4, HAND1, CSRNP3, ETS1, GATA6, VEGFA, TDGF1, TCF4, RBM15, SMARCA4	147	477	13528	3.2798	0.0923339	0.00215055	0.0957268
GOTERM_BP_FAT	GO:0051254~positive regulation of RNA metabolic process	17	10.0592	6.26511e-05	MLL, TBX3, MORF4L2, LEF1, SOX6, ISL1, PLAGL1, TDGF3, SALL4, HAND1, CSRNP3, ETS1, GATA6, VEGFA, TDGF1, TCF4, RBM15, SMARCA4	147	481	13528	3.25252	0.101428	0.00232227	0.105672
GOTERM_BP_FAT	GO:0051173~positive regulation of nitrogen compound metabolic process	20	11.8343	6.34576e-05	MLL, TBX3, INS-IGF2, MORF4L2, LEF1, IGF2, SOX6, ISL1, PLAGL1, TDGF3, IGF1R, SALL4, HAND1, CSRNP3, GATA6, ETS1, APOE, VEGFA, TDGF1, TCF4, RBM15, SMARCA4	147	644	13528	2.85799	0.102665	0.00230214	0.107031
GOTERM_BP_FAT	GO:0010557~positive regulation of macromolecule biosynthetic process	20	11.8343	7.78909e-05	MLL, TBX3, INS-IGF2, MORF4L2, LEF1, IGF2, SOX6, ISL1, PLAGL1, TDGF3, IGF1R, APOA2, SALL4, HAND1, CSRNP3, ETS1, GATA6, VEGFA, TDGF1, TCF4, RBM15, SMARCA4	147	654	13528	2.81429	0.124504	0.00265577	0.13136
GOTERM_BP_FAT	GO:0010604~positive regulation of macromolecule metabolic process	22	13.0178	0.000344567	MLL, TBX3, INS-IGF2, MORF4L2, LEF1, IGF2, SOX6, ISL1, EDNRA, PLAGL1, TDGF3, IGF1R, APOA2, SALL4, HAND1, CSRNP3, GATA6, ETS1, APOE, VEGFA, TDGF1, TCF4, RBM15, SMARCA4	147	857	13528	2.36243	0.444717	0.0073265	0.579873
GOTERM_BP_FAT	GO:0045941~positive regulation of transcription	17	10.0592	0.000386322	MLL, TBX3, MORF4L2, LEF1, SOX6, ISL1, PLAGL1, TDGF3, SALL4, HAND1, CSRNP3, ETS1, GATA6, VEGFA, TDGF1, TCF4, RBM15, SMARCA4	147	564	13528	2.77387	0.482931	0.00791525	0.649928
GOTERM_BP_FAT	GO:0010628~positive regulation of gene expression	17	10.0592	0.000534491	MLL, TBX3, MORF4L2, LEF1, SOX6, ISL1, PLAGL1, TDGF3, SALL4, HAND1, CSRNP3, ETS1, GATA6, VEGFA, TDGF1, TCF4, RBM15, SMARCA4	147	581	13528	2.69271	0.598529	0.010089	0.898142
GOTERM_BP_FAT	GO:0006357~regulation of transcription from RNA polymerase II promoter	18	10.6509	0.00215601	MLL, TBX3, MORF4L2, FST, LEF1, SOX6, ISL1, PLAGL1, TDGF3, SALL4, HAND1, CSRNP3, ETS1, GATA6, VEGFA, TDGF1, TCF4, RBM15, SMARCA4	147	727	13528	2.27853	0.974885	0.0315294	3.57668
GOTERM_BP_FAT	GO:0009890~negative regulation of biosynthetic process	14	8.28402	0.0091027	TBX3, INS-IGF2, FST, APOC1, LEF1, IGF2, SOX6, EDNRA, SALL4, HAND1, APOE, APOC3, TCF4, RBM15, SMARCA4	147	573	13528	2.24848	1	0.0969909	14.2996
GOTERM_BP_FAT	GO:0010811~positive regulation of cell-substrate adhesion	4	2.36686	0.00331044	TDGF3, TDGF1, CDK6, NID1, SPP1	147	28	13528	13.1467	0.996519	0.0442724	5.44199
GOTERM_BP_FAT	GO:0032101~regulation of response to external stimulus	7	4.14201	0.00755121	EDNRA, INS-IGF2, APOE, VEGFA, F2RL1, IGF2, SPP1, AHSG	147	159	13528	4.05151	0.999998	0.0859344	12.0068
GOTERM_BP_FAT	GO:0032844~regulation of homeostatic process	6	3.5503	0.00783621	EDNRA, ETS1, VEGFA, CDK6, SPP1, AHSG	147	114	13528	4.84354	0.999999	0.0884551	12.4323
GOTERM_BP_FAT	GO:0009952~anterior/posterior pattern formation	7	4.14201	0.00409457	TDGF3, MLL, TBX3, TDGF1, HOXA10, HOXA9, LEF1, PCSK5	147	140	13528	4.60136	0.999092	0.0524497	6.68956
GOTERM_BP_FAT	GO:0048332~mesoderm morphogenesis	4	2.36686	0.00788141	TDGF3, HAND1, TBX3, TDGF1, LEF1	147	38	13528	9.68707	0.999999	0.0883624	12.4996
GOTERM_BP_FAT	GO:0030900~forebrain development	8	4.73373	0.00129855	TBX3, RAC1, LEF1, CDH1, ISL1, MYH10, SMARCA4, AHSG	147	152	13528	4.84354	0.89118	0.0211017	2.16887
GOTERM_BP_FAT	GO:0007167~enzyme linked receptor protein signaling pathway	11	6.50888	0.00397365	NRP1, INS-IGF2, ERBB3, FST, IGF2, HGF, TDGF3, IGF1R, TDGF1, VEGFA, TGFBR3, BAMBI, FIGF	147	342	13528	2.95994	0.998882	0.0513225	6.49819
GOTERM_BP_FAT	GO:0000904~cell morphogenesis involved in differentiation	12	7.10059	6.74531e-05	IGF1R, NRP1, ERBB3, MAP1B, RAC1, TGFBR3, LEF1, HGF, LAMB1, ISL1, MYH10, FN1	147	244	13528	4.52593	0.108764	0.00234717	0.113767
GOTERM_BP_FAT	GO:0032989~cellular component morphogenesis	15	8.87574	9.99184e-05	NRP1, ERBB3, MAP1B, LEF1, HGF, SOX6, ISL1, IGF1R, KRT19, EZR, RAC1, TGFBR3, LAMB1, MYH10, FN1	147	397	13528	3.4771	0.156815	0.00304124	0.16848
GOTERM_BP_FAT	GO:0000902~cell morphogenesis	14	8.28402	0.00012638	NRP1, ERBB3, MAP1B, LEF1, HGF, SOX6, ISL1, IGF1R, EZR, RAC1, TGFBR3, LAMB1, MYH10, FN1	147	356	13528	3.61905	0.194059	0.00365	0.213054
GOTERM_BP_FAT	GO:0048870~cell motility	10	5.91716	0.00609448	APOB, NRP1, APOA1, ETS1, PODXL, RAC1, TGFBR3, ISL1, MYH10, FN1	147	307	13528	2.99763	0.999971	0.0728285	9.8017
GOTERM_BP_FAT	GO:0051674~localization of cell	10	5.91716	0.00609448	APOB, NRP1, APOA1, ETS1, PODXL, RAC1, TGFBR3, ISL1, MYH10, FN1	147	307	13528	2.99763	0.999971	0.0728285	9.8017
GOTERM_BP_FAT	GO:0031175~neuron projection development	9	5.32544	0.00660624	IGF1R, NRP1, ERBB3, MAP1B, RAC1, CDH1, LAMB1, ISL1, MYH10	147	256	13528	3.23533	0.999988	0.0776368	10.5822
GOTERM_BP_FAT	GO:0051781~positive regulation of cell division	4	2.36686	0.00847166	PPBP, INS-IGF2, VEGFA, IGF2, FIGF	147	39	13528	9.43869	1	0.0922789	13.3739
GOTERM_BP_FAT	GO:0015669~gas transport	4	2.36686	0.000892236	HBG1, HBG2, AQP1, HBE1	147	18	13528	20.4505	0.782102	0.0155858	1.49504
GOTERM_BP_FAT	GO:0015671~oxygen transport	3	1.77515	0.00834636	HBG1, HBG2, HBE1	147	13	13528	21.237	0.999999	0.0921436	13.189
GOTERM_BP_FAT	GO:0046545~development of primary female sexual characteristics	7	4.14201	9.76867e-05	AFP, RBP4, TBX3, FST, VEGFA, ZFP42, ADAMTS1	147	69	13528	9.33609	0.153597	0.0030274	0.164719
GOTERM_BP_FAT	GO:0046660~female sex differentiation	7	4.14201	9.76867e-05	AFP, RBP4, TBX3, FST, VEGFA, ZFP42, ADAMTS1	147	69	13528	9.33609	0.153597	0.0030274	0.164719
GOTERM_BP_FAT	GO:0045137~development of primary sexual characteristics	8	4.73373	0.000448567	AFP, RBP4, TBX3, FST, VEGFA, ZFP42, ADAMTS1, AHSG	147	127	13528	5.79699	0.535073	0.00886599	0.754272
GOTERM_BP_FAT	GO:0007548~sex differentiation	8	4.73373	0.00125004	AFP, RBP4, TBX3, FST, VEGFA, ZFP42, ADAMTS1, AHSG	147	151	13528	4.87561	0.881774	0.0205163	2.08865
GOTERM_BP_FAT	GO:0008406~gonad development	7	4.14201	0.00133478	AFP, RBP4, FST, VEGFA, ZFP42, ADAMTS1, AHSG	147	112	13528	5.7517	0.897714	0.0212796	2.22874
GOTERM_BP_FAT	GO:0003006~reproductive developmental process	10	5.91716	0.00215288	IGF1R, AFP, RBP4, TBX3, FST, VEGFA, ZFP42, ADAMTS1, SPP1, AHSG	147	262	13528	3.51249	0.97475	0.0317562	3.57159
GOTERM_BP_FAT	GO:0048608~reproductive structure development	7	4.14201	0.00243039	AFP, RBP4, FST, VEGFA, ZFP42, ADAMTS1, AHSG	147	126	13528	5.11262	0.984294	0.0340221	4.02313
GOTERM_BP_FAT	GO:0008585~female gonad development	5	2.95858	0.00501067	AFP, FST, VEGFA, ZFP42, ADAMTS1	147	64	13528	7.18963	0.999811	0.0624372	8.12747
GOTERM_BP_FAT	GO:0045834~positive regulation of lipid metabolic process	8	4.73373	5.557e-07	APOA4, APOA2, APOA1, INS-IGF2, APOE, RAC1, APOC1, FABP1, IGF2	147	46	13528	16.0047	0.00094813	9.48535e-05	0.000937745
GOTERM_BP_FAT	GO:0055088~lipid homeostasis	7	4.14201	1.72103e-05	APOA4, APOA2, APOB, APOA1, INS-IGF2, APOE, APOC3, IGF2	147	51	13528	12.6312	0.0289509	0.000917648	0.0290386
GOTERM_BP_FAT	GO:0051051~negative regulation of transport	8	4.73373	0.000647023	APOA2, APOA1, ERBB3, INS-IGF2, FST, APOC3, RAC1, APOC1, IGF2	147	135	13528	5.45346	0.668731	0.0118096	1.08627
GOTERM_BP_FAT	GO:0051048~negative regulation of secretion	5	2.95858	0.00289796	APOA2, APOA1, ERBB3, INS-IGF2, FST, IGF2	147	55	13528	8.36611	0.992945	0.0394761	4.77944
GOTERM_BP_FAT	GO:0022604~regulation of cell morphogenesis	9	5.32544	8.58837e-05	EZR, NRP1, APOE, VEGFA, MAP1B, TGFBR3, MYH10, SPP1, FN1	147	131	13528	6.32248	0.136369	0.00287057	0.144831
GOTERM_BP_FAT	GO:0048638~regulation of developmental growth	5	2.95858	0.0016198	RBP4, NRP1, APOE, MAP1B, SPP1	147	47	13528	9.79013	0.937165	0.0252972	2.69857
GOTERM_BP_FAT	GO:0060284~regulation of cell development	9	5.32544	0.0017161	NRP1, TBX3, INS-IGF2, APOE, MAP1B, TGFBR3, IGF2, ISL1, IGFBP3, SPP1	147	205	13528	4.04022	0.946704	0.0263015	2.85682
GOTERM_BP_FAT	GO:0010769~regulation of cell morphogenesis involved in differentiation	5	2.95858	0.00958573	NRP1, APOE, MAP1B, TGFBR3, SPP1	147	77	13528	5.97579	1	0.101263	15.0018
GOTERM_BP_FAT	GO:0001501~skeletal system development	13	7.69231	0.00017593	RBP4, TBX3, INS-IGF2, IGF2, SOX6, FRZB, COL5A2, AHSG, ANKRD11, HOXA10, HOXA9, PCSK5, IGFBP3, SPP1	147	319	13528	3.75033	0.259433	0.00460995	0.29647
GOTERM_BP_FAT	GO:0048332~mesoderm morphogenesis	4	2.36686	0.00788141	TDGF3, HAND1, TBX3, TDGF1, LEF1	147	38	13528	9.68707	0.999999	0.0883624	12.4996
GOTERM_BP_FAT	GO:0007498~mesoderm development	5	2.95858	0.00835438	TDGF3, HAND1, TBX3, VEGFA, TDGF1, LEF1	147	74	13528	6.21805	0.999999	0.0916386	13.2008
GOTERM_BP_FAT	GO:0010552~positive regulation of specific transcription from RNA polymerase II promoter	5	2.95858	0.00330116	HAND1, ETS1, GATA6, RBM15, SMARCA4	147	57	13528	8.07256	0.996463	0.0444989	5.42713
GOTERM_BP_FAT	GO:0006953~acute-phase response	4	2.36686	0.00908721	INS-IGF2, IGF2, SERPINA1, AHSG, FN1	147	40	13528	9.20272	1	0.0974383	14.277
GOTERM_BP_FAT	GO:0048638~regulation of developmental growth	5	2.95858	0.0016198	RBP4, NRP1, APOE, MAP1B, SPP1	147	47	13528	9.79013	0.937165	0.0252972	2.69857
GOTERM_BP_FAT	GO:0032101~regulation of response to external stimulus	7	4.14201	0.00755121	EDNRA, INS-IGF2, APOE, VEGFA, F2RL1, IGF2, SPP1, AHSG	147	159	13528	4.05151	0.999998	0.0859344	12.0068
GOTERM_BP_FAT	GO:0032101~regulation of response to external stimulus	7	4.14201	0.00755121	EDNRA, INS-IGF2, APOE, VEGFA, F2RL1, IGF2, SPP1, AHSG	147	159	13528	4.05151	0.999998	0.0859344	12.0068
GOTERM_BP_FAT	GO:0032101~regulation of response to external stimulus	7	4.14201	0.00755121	EDNRA, INS-IGF2, APOE, VEGFA, F2RL1, IGF2, SPP1, AHSG	147	159	13528	4.05151	0.999998	0.0859344	12.0068
GOTERM_CC_FAT	GO:0044421~extracellular region part	42	24.8521	1.17211e-15	RBP4, COL21A1, INS-IGF2, ERBB3, NPNT, APOC1, AHSG, APOA4, TDGF3, APOB, FGG, APOA2, APOA1, GPC3, FGA, APOE, FGB, COL6A3, TDGF1, APOC3, COL6A1, SERPINA1, SEPP1, LAMB1, FIGF, PCSK5, FN1, SPP1, FLRT2, HAPLN1, IGF2, NID1, NID2, COL5A2, AFP, THBD, PPBP, FREM2, VEGFA, TFPI, TGFBR3, ADAMTS1, PCYOX1, IGFBP3	133	960	12782	4.20461	3.00426e-13	3.00426e-13	1.58762e-12
GOTERM_CC_FAT	GO:0005615~extracellular space	31	18.3432	9.75878e-12	RBP4, INS-IGF2, ERBB3, APOC1, AHSG, APOA4, TDGF3, APOA2, FGG, APOB, APOA1, GPC3, FGA, APOE, FGB, APOC3, TDGF1, COL6A3, SERPINA1, SEPP1, FIGF, PCSK5, FN1, SPP1, IGF2, AFP, THBD, PPBP, VEGFA, TFPI, TGFBR3, PCYOX1, IGFBP3	133	685	12782	4.34929	2.40065e-09	1.20033e-09	1.26454e-08
GOTERM_CC_FAT	GO:0005576~extracellular region	48	28.4024	1.56055e-08	NRP1, COL21A1, INS-IGF2, NPNT, FST, APOA4, TDGF3, APOA2, APOB, GPC3, APOA1, APOE, RSPO2, TDGF1, SERPINA1, SEPP1, THBD, PPBP, VEGFA, TFPI, ADAMTS1, PCYOX1, RBP4, ERBB3, APOC1, AHSG, FGG, FGA, FGB, FOLR1, APOC3, COL6A3, COL6A1, LAMB1, FIGF, PCSK5, SPP1, FN1, HAPLN1, FLRT2, NID1, IGF2, HGF, NID2, FRZB, COL5A2, AFP, FREM2, TGFBR3, IGFBP3	133	2010	12782	2.29505	3.83894e-06	5.48422e-07	2.02216e-05
GOTERM_CC_FAT	GO:0031983~vesicle lumen	10	5.91716	8.0942e-10	FGG, APOB, FGA, PPBP, FGB, VEGFA, SERPINA1, HGF, FIGF, FN1	133	46	12782	20.8924	1.99117e-07	4.97794e-08	1.04885e-06
GOTERM_CC_FAT	GO:0031093~platelet alpha granule lumen	9	5.32544	7.49785e-09	FGG, FGA, PPBP, FGB, VEGFA, SERPINA1, HGF, FIGF, FN1	133	41	12782	21.0963	1.84447e-06	3.68894e-07	9.71571e-06
GOTERM_CC_FAT	GO:0060205~cytoplasmic membrane-bounded vesicle lumen	9	5.32544	1.35514e-08	FGG, FGA, PPBP, FGB, VEGFA, SERPINA1, HGF, FIGF, FN1	133	44	12782	19.6579	3.33363e-06	5.55606e-07	1.75598e-05
GOTERM_CC_FAT	GO:0031091~platelet alpha granule	9	5.32544	9.79027e-08	FGG, FGA, PPBP, FGB, VEGFA, SERPINA1, HGF, FIGF, FN1	133	56	12782	15.4455	2.40838e-05	2.4084e-06	0.000126862
GOTERM_CC_FAT	GO:0030141~secretory granule	11	6.50888	1.69227e-05	FGG, APOA1, FGA, PPBP, FGB, VEGFA, SERPINA1, HGF, FIGF, PCSK5, FN1	133	180	12782	5.8731	0.00415437	0.000244854	0.0219262
GOTERM_CC_FAT	GO:0005577~fibrinogen complex	4	2.36686	3.65568e-05	FGG, FGA, FGB, FN1	133	7	12782	54.9173	0.00895283	0.000499495	0.04736
GOTERM_CC_FAT	GO:0044433~cytoplasmic vesicle part	10	5.91716	0.00013693	FGG, APOB, FGA, PPBP, FGB, VEGFA, SERPINA1, HGF, FIGF, FN1	133	187	12782	5.13932	0.0331261	0.00160286	0.177289
GOTERM_CC_FAT	GO:0031988~membrane-bounded vesicle	17	10.0592	0.000246859	GOLIM4, HGF, FGG, APOB, APOA1, FGA, PPBP, FGB, VEGFA, SLC2A1, RAC1, SERPINA1, FIGF, PCSK5, SLC40A1, FN1, SPP1	133	568	12782	2.87639	0.0589273	0.00263716	0.319408
GOTERM_CC_FAT	GO:0031982~vesicle	18	10.6509	0.000527635	GOLIM4, HGF, FGG, APOB, APOA1, FGA, PPBP, FGB, VEGFA, SLC2A1, RAC1, SERPINA1, ADAMTS1, FIGF, PCSK5, SLC40A1, FN1, SPP1	133	670	12782	2.58193	0.121758	0.00539509	0.681557
GOTERM_CC_FAT	GO:0016023~cytoplasmic membrane-bounded vesicle	16	9.46746	0.000546605	GOLIM4, HGF, FGG, APOB, APOA1, FGA, PPBP, FGB, VEGFA, RAC1, SLC2A1, SERPINA1, FIGF, PCSK5, SLC40A1, FN1	133	550	12782	2.79579	0.125849	0.00515978	0.70598
GOTERM_CC_FAT	GO:0031410~cytoplasmic vesicle	17	10.0592	0.000939578	GOLIM4, HGF, FGG, APOB, APOA1, FGA, PPBP, FGB, VEGFA, SLC2A1, RAC1, SERPINA1, ADAMTS1, FIGF, PCSK5, SLC40A1, FN1	133	642	12782	2.54484	0.206455	0.00822474	1.21069
GOTERM_CC_FAT	GO:0031012~extracellular matrix	17	10.0592	5.1541e-07	HAPLN1, FLRT2, COL21A1, NPNT, NID1, NID2, COL5A2, AHSG, GPC3, FREM2, VEGFA, COL6A3, COL6A1, SERPINA1, ADAMTS1, LAMB1, FN1	133	345	12782	4.73562	0.000126783	1.15264e-05	0.000667866
GOTERM_CC_FAT	GO:0005578~proteinaceous extracellular matrix	16	9.46746	1.05004e-06	HAPLN1, FLRT2, COL21A1, NPNT, NID1, NID2, COL5A2, GPC3, FREM2, VEGFA, COL6A3, COL6A1, SERPINA1, ADAMTS1, LAMB1, FN1	133	320	12782	4.80526	0.000258278	2.15257e-05	0.00136064
GOTERM_CC_FAT	GO:0044420~extracellular matrix part	10	5.91716	3.27391e-06	FREM2, VEGFA, COL6A3, COL6A1, ADAMTS1, NID1, NID2, LAMB1, COL5A2, FN1	133	117	12782	8.21413	0.00080506	6.19507e-05	0.00424225
GOTERM_CC_FAT	GO:0005604~basement membrane	7	4.14201	0.000151234	FREM2, VEGFA, ADAMTS1, NID1, NID2, LAMB1, FN1	133	78	12782	8.62483	0.0365226	0.00168976	0.195791
GOTERM_CC_FAT	GO:0034361~very-low-density lipoprotein particle	8	4.73373	7.39899e-10	APOA4, APOA2, APOB, APOA1, APOE, APOC3, APOC1, PCYOX1	133	20	12782	38.4421	1.82015e-07	6.06717e-08	9.5876e-07
GOTERM_CC_FAT	GO:0034385~triglyceride-rich lipoprotein particle	8	4.73373	7.39899e-10	APOA4, APOA2, APOB, APOA1, APOE, APOC3, APOC1, PCYOX1	133	20	12782	38.4421	1.82015e-07	6.06717e-08	9.5876e-07
GOTERM_CC_FAT	GO:0034358~plasma lipoprotein particle	8	4.73373	5.64267e-08	APOA4, APOA2, APOB, APOA1, APOE, APOC3, APOC1, PCYOX1	133	35	12782	21.9669	1.38809e-05	1.73512e-06	7.31176e-05
GOTERM_CC_FAT	GO:0032994~protein-lipid complex	8	4.73373	5.64267e-08	APOA4, APOA2, APOB, APOA1, APOE, APOC3, APOC1, PCYOX1	133	35	12782	21.9669	1.38809e-05	1.73512e-06	7.31176e-05
GOTERM_CC_FAT	GO:0042627~chylomicron	6	3.5503	8.13554e-08	APOA4, APOA2, APOB, APOE, APOC3, APOC1	133	12	12782	48.0526	2.00132e-05	2.22371e-06	0.00010542
GOTERM_CC_FAT	GO:0034364~high-density lipoprotein particle	6	3.5503	4.89946e-06	APOA4, APOA2, APOA1, APOE, APOC3, APOC1	133	25	12782	23.0653	0.00120454	8.6087e-05	0.00634853
GOTERM_CC_FAT	GO:0034363~intermediate-density lipoprotein particle	3	1.77515	0.000626505	APOB, APOE, APOC3	133	4	12782	72.0789	0.142873	0.00569368	0.808791
GOTERM_CC_FAT	GO:0034366~spherical high-density lipoprotein particle	3	1.77515	0.0028454	APOA2, APOA1, APOC3	133	8	12782	36.0395	0.503895	0.0230947	3.62499
GOTERM_CC_FAT	GO:0005788~endoplasmic reticulum lumen	5	2.95858	0.00938847	APOA4, APOA2, APOB, APOA1, INS-IGF2, IGF2	133	80	12782	6.00658	0.901773	0.059238	11.5056
GOTERM_CC_FAT	GO:0031983~vesicle lumen	10	5.91716	8.0942e-10	FGG, APOB, FGA, PPBP, FGB, VEGFA, SERPINA1, HGF, FIGF, FN1	133	46	12782	20.8924	1.99117e-07	4.97794e-08	1.04885e-06
GOTERM_CC_FAT	GO:0005577~fibrinogen complex	4	2.36686	3.65568e-05	FGG, FGA, FGB, FN1	133	7	12782	54.9173	0.00895283	0.000499495	0.04736
GOTERM_CC_FAT	GO:0044433~cytoplasmic vesicle part	10	5.91716	0.00013693	FGG, APOB, FGA, PPBP, FGB, VEGFA, SERPINA1, HGF, FIGF, FN1	133	187	12782	5.13932	0.0331261	0.00160286	0.177289
GOTERM_CC_FAT	GO:0009897~external side of plasma membrane	7	4.14201	0.0083687	FGG, GPC3, FGA, FREM2, FGB, APOE, TGFBR3	133	170	12782	3.95728	0.873481	0.0543424	10.3178
GOTERM_CC_FAT	GO:0043233~organelle lumen	39	23.0769	1.04589e-05	INS-IGF2, MORF4L2, HS3ST1, MYBL1, ZNF207, APOA4, APOB, FGG, APOA2, APOA1, FGA, HAND1, GATA6, FGB, SRRM2, HOXA10, HOXA9, SERPINA1, TCF4, FIGF, PCSK5, KPNB1, RBM25, PITX2, FN1, PDK1, ZMYM2, MLL, TBX3, GOLIM4, LEF1, IGF2, DACH1, HGF, SON, PPBP, CSRNP3, VEGFA, FABP1, DUSP6	133	1820	12782	2.0594	0.00256961	0.000171513	0.0135518
GOTERM_CC_FAT	GO:0031974~membrane-enclosed lumen	39	23.0769	1.64993e-05	INS-IGF2, MORF4L2, HS3ST1, MYBL1, ZNF207, APOA4, APOB, FGG, APOA2, APOA1, FGA, HAND1, GATA6, FGB, SRRM2, HOXA10, HOXA9, SERPINA1, TCF4, FIGF, PCSK5, KPNB1, RBM25, PITX2, FN1, PDK1, ZMYM2, MLL, TBX3, GOLIM4, LEF1, IGF2, DACH1, HGF, SON, PPBP, CSRNP3, VEGFA, FABP1, DUSP6	133	1856	12782	2.01945	0.00405065	0.000253647	0.0213777
GOTERM_CC_FAT	GO:0070013~intracellular organelle lumen	30	17.7515	0.00757524	INS-IGF2, HS3ST1, MORF4L2, MYBL1, ZNF207, APOA4, APOB, APOA2, APOA1, HAND1, GATA6, SRRM2, HOXA10, HOXA9, TCF4, KPNB1, PCSK5, RBM25, PITX2, PDK1, ZMYM2, MLL, TBX3, GOLIM4, LEF1, IGF2, DACH1, SON, CSRNP3, FABP1, DUSP6	133	1779	12782	1.62066	0.845969	0.0506343	9.38347
GOTERM_CC_FAT	GO:0005833~hemoglobin complex	3	1.77515	0.006528	HBG1, HBG2, HBE1	133	12	12782	24.0263	0.800343	0.0449895	8.13656
GOTERM_CC_FAT	GO:0005788~endoplasmic reticulum lumen	5	2.95858	0.00938847	APOA4, APOA2, APOB, APOA1, INS-IGF2, IGF2	133	80	12782	6.00658	0.901773	0.059238	11.5056
GOTERM_CC_FAT	GO:0030057~desmosome	5	2.95858	4.63113e-05	DSG2, PKP2, PKP4, DSP, DSC2	133	20	12782	24.0263	0.0113282	0.000599443	0.0599935
GOTERM_CC_FAT	GO:0005911~cell-cell junction	8	4.73373	0.00355159	F11R, DSG2, PKP2, PKP4, SLC2A1, DSP, DSC2, CDH1	133	190	12782	4.04654	0.583241	0.0278389	4.50568
GOTERM_CC_FAT	GO:0043296~apical junction complex	6	3.5503	0.00358745	F11R, DSG2, PKP2, PKP4, DSP, DSC2	133	99	12782	5.82456	0.586914	0.0272499	4.5502
GOTERM_CC_FAT	GO:0016327~apicolateral plasma membrane	6	3.5503	0.00407667	F11R, DSG2, PKP2, PKP4, DSP, DSC2	133	102	12782	5.65325	0.633923	0.0291237	5.15569
GOTERM_CC_FAT	GO:0044459~plasma membrane part	42	24.8521	6.63779e-05	ERBB3, F2RL1, CDH1, AQP1, ATP2B1, EDNRA, EPCAM, IGF1R, TDGF3, FGG, GPC3, EZR, FGA, FOLR1, APOE, FGB, SLC2A1, TDGF1, RAC1, LAMB1, FN1, FLRT2, F11R, BST2, PODXL, EFNB2, FZD2, SLC9A3R1, SLC16A3, ITGA9, THBD, DSG2, FREM2, PKP2, PKP4, TGFBR3, DSC2, DSP, PTCH1, HAS2, SLC40A1, HS3ST3B1, KCTD12	133	2203	12782	1.83224	0.0161969	0.000816142	0.0859782
GOTERM_CC_FAT	GO:0005886~plasma membrane	57	33.7278	0.00105976	NRP1, F2RL1, AQP1, ATP2B1, EDNRA, EPCAM, TDGF3, APOB, APOA1, GPC3, MCOLN3, SLC2A3, APOE, SLC2A1, TDGF1, F11R, BST2, EFNB2, SLC9A3R1, KRT19, THBD, TFPI, DSP, HAS2, PCYOX1, SLC40A1, HS3ST3B1, ERBB3, SLC2A14, CDH1, IGF1R, FGG, EZR, FGA, FOLR1, FGB, COL6A3, RAC1, COL6A1, LAMB1, FN1, FLRT2, PODXL, MAP1B, FZD2, FZD7, RGS13, SLC16A3, ITGA9, DSG2, FREM2, PKP2, PKP4, TGFBR3, DSC2, PTCH1, MYH10, KCTD12	133	3777	12782	1.45036	0.229595	0.00895411	1.36457
GOTERM_MF_FAT	GO:0043498~cell surface binding	5	2.95858	0.000242734	APOA4, FGG, FGA, FGB, VEGFA	140	29	12983	15.9889	0.0821263	0.00947653	0.331892
GOTERM_MF_FAT	GO:0008201~heparin binding	8	4.73373	0.000116731	APOB, APOE, VEGFA, RSPO2, TGFBR3, ADAMTS1, PTCH1, FN1	140	103	12983	7.20277	0.040371	0.00586964	0.159735
GOTERM_MF_FAT	GO:0005539~glycosaminoglycan binding	9	5.32544	0.000128529	HAPLN1, APOB, APOE, VEGFA, RSPO2, TGFBR3, ADAMTS1, PTCH1, FN1	140	140	12983	5.96158	0.0443595	0.00565564	0.175865
GOTERM_MF_FAT	GO:0001871~pattern binding	9	5.32544	0.000247717	HAPLN1, APOB, APOE, VEGFA, RSPO2, TGFBR3, ADAMTS1, PTCH1, FN1	140	154	12983	5.41962	0.0837397	0.00870735	0.338694
GOTERM_MF_FAT	GO:0030247~polysaccharide binding	9	5.32544	0.000247717	HAPLN1, APOB, APOE, VEGFA, RSPO2, TGFBR3, ADAMTS1, PTCH1, FN1	140	154	12983	5.41962	0.0837397	0.00870735	0.338694
GOTERM_MF_FAT	GO:0030246~carbohydrate binding	11	6.50888	0.00475143	HAPLN1, APOB, GALNT7, APOE, VEGFA, RSPO2, HK2, TGFBR3, ADAMTS1, PTCH1, FN1	140	354	12983	2.88162	0.813859	0.0735735	6.31404
GOTERM_MF_FAT	GO:0060228~phosphatidylcholine-sterol O-acyltransferase activator activity	5	2.95858	6.24015e-08	APOA4, APOA2, APOA1, APOE, APOC1	140	5	12983	92.7357	2.20275e-05	2.20275e-05	8.54534e-05
GOTERM_MF_FAT	GO:0005543~phospholipid binding	13	7.69231	4.20949e-07	MAP1B, APOC1, ITPR2, APOA4, APOB, ANXA8, APOA2, APOA1, ANXA8L1, APOE, APOC3, ANXA8L2, FABP1	140	177	12983	6.8111	0.000148584	7.42948e-05	0.000576453
GOTERM_MF_FAT	GO:0017127~cholesterol transporter activity	5	2.95858	5.82716e-06	APOA4, APOA2, APOB, APOA1, APOE	140	12	12983	38.6399	0.00205488	0.000685429	0.0079795
GOTERM_MF_FAT	GO:0015248~sterol transporter activity	5	2.95858	1.1589e-05	APOA4, APOA2, APOB, APOA1, APOE	140	14	12983	33.1199	0.00408258	0.00102221	0.015869
GOTERM_MF_FAT	GO:0070325~lipoprotein receptor binding	5	2.95858	1.56721e-05	APOA2, APOB, APOA1, APOE, APOC3	140	15	12983	30.9119	0.005517	0.00110584	0.0214594
GOTERM_MF_FAT	GO:0008289~lipid binding	16	9.46746	9.43657e-05	RBP4, MAP1B, APOC1, AKAP13, ARHGAP29, ITPR2, APOA4, APOA2, APOB, ANXA8, APOA1, ANXA8L1, APOE, APOC3, ANXA8L2, FABP1	140	450	12983	3.29727	0.0327639	0.00553672	0.129148
GOTERM_MF_FAT	GO:0070653~high-density lipoprotein receptor binding	3	1.77515	0.000339025	APOA2, APOA1, APOC3	140	3	12983	92.7357	0.11281	0.0108225	0.463268
GOTERM_MF_FAT	GO:0005319~lipid transporter activity	6	3.5503	0.000558924	APOA4, APOA2, APOB, APOA1, APOE, FABP1	140	63	12983	8.83197	0.179101	0.0150665	0.762689
GOTERM_MF_FAT	GO:0031210~phosphatidylcholine binding	3	1.77515	0.00165966	APOA4, APOA2, APOC1	140	6	12983	46.3679	0.443643	0.0339029	2.24897
GOTERM_MF_FAT	GO:0008047~enzyme activator activity	11	6.50888	0.00322284	APOA4, APOA2, APOA1, ERBB3, APOE, APOC1, TBC1D4, ARHGAP29, DEPDC1, IGFBP3, FN1	140	335	12983	3.04505	0.680021	0.0553823	4.32425
GOTERM_MF_FAT	GO:0050997~quaternary ammonium group binding	3	1.77515	0.00390003	APOA4, APOA2, APOC1	140	9	12983	30.9119	0.748271	0.063575	5.21054
GOTERM_MF_FAT	GO:0043498~cell surface binding	5	2.95858	0.000242734	APOA4, FGG, FGA, FGB, VEGFA	140	29	12983	15.9889	0.0821263	0.00947653	0.331892
GOTERM_MF_FAT	GO:0043499~eukaryotic cell surface binding	4	2.36686	0.000731607	APOA4, FGG, FGA, FGB	140	17	12983	21.8202	0.227677	0.0182845	0.997235
GOTERM_MF_FAT	GO:0005355~glucose transmembrane transporter activity	4	2.36686	0.00049727	PPBP, SLC2A3, SLC2A14, SLC2A1	140	15	12983	24.7295	0.16103	0.0145252	0.678824
GOTERM_MF_FAT	GO:0015149~hexose transmembrane transporter activity	4	2.36686	0.000871076	PPBP, SLC2A3, SLC2A14, SLC2A1	140	18	12983	20.6079	0.264808	0.0202994	1.18629
GOTERM_MF_FAT	GO:0015145~monosaccharide transmembrane transporter activity	4	2.36686	0.00102633	PPBP, SLC2A3, SLC2A14, SLC2A1	140	19	12983	19.5233	0.304053	0.0224004	1.39635
GOTERM_MF_FAT	GO:0051119~sugar transmembrane transporter activity	4	2.36686	0.00260718	PPBP, SLC2A3, SLC2A14, SLC2A1	140	26	12983	14.267	0.602093	0.0473445	3.51183
GOTERM_MF_FAT	GO:0005344~oxygen transporter activity	3	1.77515	0.0082164	HBG1, HBG2, HBE1	140	13	12983	21.4005	0.945653	0.109965	10.6833
GOTERM_MF_FAT	GO:0004857~enzyme inhibitor activity	10	5.91716	0.00248414	SERPINB9, APOA2, PHACTR2, COL6A3, APOC3, WNK1, TFPI, APOC1, SERPINA1, AHSG	140	270	12983	3.43466	0.584384	0.0476069	3.3487
GOTERM_MF_FAT	GO:0019838~growth factor binding	6	3.5503	0.0053724	IGF1R, ERBB3, INS-IGF2, TGFBR3, COL6A1, IGF2, IGFBP3	140	105	12983	5.29918	0.850666	0.0793514	7.11135
INTERPRO	IPR013326:Apolipoprotein/apolipophorin	3	1.77515	0.000503261	APOA4, APOA1, APOE	155	4	16659	80.6081	0.18073	0.0642877	0.698649
INTERPRO	IPR000074:Apolipoprotein A1/A4/E	3	1.77515	0.000503261	APOA4, APOA1, APOE	155	4	16659	80.6081	0.18073	0.0642877	0.698649
INTERPRO	IPR012290:Fibrinogen, alpha/beta/gamma chain, coiled coil	3	1.77515	0.00025317	FGG, FGA, FGB	155	3	16659	107.477	0.0954049	0.0954049	0.352029
INTERPRO	IPR000716:Thyroglobulin type-1	4	2.36686	0.000478989	EPCAM, NID1, NID2, IGFBP3	155	17	16659	25.2888	0.172813	0.090502	0.665058
INTERPRO	IPR003663:Sugar/inositol transporter	3	1.77515	0.00718303	SLC2A3, SLC2A14, SLC2A1	155	14	16659	23.0309	0.942429	0.334902	9.55278
INTERPRO	IPR005828:General substrate transporter	3	1.77515	0.00935826	SLC2A3, SLC2A14, SLC2A1	155	16	16659	20.152	0.975846	0.372126	12.274
INTERPRO	IPR009115:Annexin, type VIII	3	1.77515	0.00025317	ANXA8, ANXA8L1, ANXA8L2	155	3	16659	107.477	0.0954049	0.0954049	0.352029
INTERPRO	IPR001464:Annexin	3	1.77515	0.00718303	ANXA8, ANXA8L1, ANXA8L2	155	14	16659	23.0309	0.942429	0.334902	9.55278
INTERPRO	IPR018502:Annexin repeat	3	1.77515	0.00718303	ANXA8, ANXA8L1, ANXA8L2	155	14	16659	23.0309	0.942429	0.334902	9.55278
INTERPRO	IPR018252:Annexin repeat, conserved site	3	1.77515	0.00718303	ANXA8, ANXA8L1, ANXA8L2	155	14	16659	23.0309	0.942429	0.334902	9.55278
INTERPRO	IPR002337:Haemoglobin, beta	3	1.77515	0.000833673	HBG1, HBG2, HBE1	155	5	16659	64.4865	0.281272	0.0639201	1.15488
INTERPRO	IPR012292:Globin	3	1.77515	0.00527314	HBG1, HBG2, HBE1	155	12	16659	26.8694	0.876768	0.29457	7.0991
INTERPRO	IPR000971:Globin, subset	3	1.77515	0.00527314	HBG1, HBG2, HBE1	155	12	16659	26.8694	0.876768	0.29457	7.0991
KEGG_PATHWAY	hsa04510:Focal adhesion	12	7.10059	1.24616e-05	IGF1R, ITGA9, VEGFA, COL6A3, RAC1, COL6A1, HGF, LAMB1, COL5A2, FIGF, SPP1, FN1	59	201	5085	5.14546	0.000996438	0.000498343	0.0132473
KEGG_PATHWAY	hsa04512:ECM-receptor interaction	7	4.14201	0.000345767	ITGA9, COL6A3, COL6A1, LAMB1, COL5A2, SPP1, FN1	59	84	5085	7.1822	0.0272869	0.00917965	0.366979
KEGG_PATHWAY	hsa04610:Complement and coagulation cascades	6	3.5503	0.00104322	FGG, THBD, FGA, FGB, TFPI, SERPINA1	59	69	5085	7.49447	0.0801097	0.0206588	1.10351
KEGG_PATHWAY	hsa04512:ECM-receptor interaction	7	4.14201	0.000345767	ITGA9, COL6A3, COL6A1, LAMB1, COL5A2, SPP1, FN1	59	84	5085	7.1822	0.0272869	0.00917965	0.366979
KEGG_PATHWAY	hsa05412:Arrhythmogenic right ventricular cardiomyopathy (ARVC)	6	3.5503	0.00161393	ITGA9, DSG2, PKP2, DSP, LEF1, DSC2	59	76	5085	6.80419	0.121218	0.0213062	1.70252
OMIM_DISEASE	Newly identified loci that influence lipid concentrations and risk of coronary artery disease	6	3.5503	0.000101478	APOA4, APOB, APOA1, APOE, APOC3, APOC1	63	29	3671	12.0558	0.0151072	0.0151072	0.121114
OMIM_DISEASE	Six new loci associated with blood low-density lipoprotein cholesterol, high-density lipoprotein cholesterol or triglycerides in humans	6	3.5503	0.000222824	APOA4, APOB, APOA1, APOE, APOC3, APOC1	63	34	3671	10.2829	0.0328749	0.0165748	0.265765
OMIM_DISEASE	Common variants at 30 loci contribute to polygenic dyslipidemia	6	3.5503	0.000848306	APOA4, APOB, APOA1, APOE, APOC3, APOC1	63	45	3671	7.76931	0.11953	0.0415456	1.00833
OMIM_DISEASE	Loci influencing lipid levels and coronary heart disease risk in 16 European population cohorts	5	2.95858	0.0012772	APOA4, APOB, APOA1, APOE, APOC3	63	29	3671	10.0465	0.174448	0.0467953	1.51458
OMIM_DISEASE	A null mutation in human APOC3 confers a favorable plasma lipid profile and apparent cardioprotection	3	1.77515	0.00271648	APOA4, APOA1, APOC3	63	5	3671	34.9619	0.335038	0.0783642	3.19614
PIR_SUPERFAMILY	PIRSF002367:apolipoprotein A-I	5	2.95858	2.07066e-07	APOA2, APOA1, APOE, APOC3, APOC1	83	6	7396	74.257	2.02923e-05	2.02923e-05	0.000228955
PIR_SUPERFAMILY	PIRSF002359:annexin I	3	1.77515	0.00745733	ANXA8, ANXA8L1, ANXA8L2	83	12	7396	22.2771	0.519802	0.167556	7.9433
PIR_SUPERFAMILY	PIRSF500045:hemoglobin, vertebrate type	3	1.77515	0.00325609	HBG1, HBG2, HBE1	83	8	7396	33.4157	0.273573	0.147693	3.54192
PIR_SUPERFAMILY	PIRSF036518:globin	3	1.77515	0.00625926	HBG1, HBG2, HBE1	83	11	7396	24.3023	0.45954	0.185444	6.70716
SMART	SM00211:TY	4	2.36686	0.000933815	EPCAM, NID1, NID2, IGFBP3	107	17	9079	19.9648	0.0993478	0.0993478	1.05346
SP_PIR_KEYWORDS	signal	65	38.4615	7.97215e-12	IGDCC3, NRP1, COL21A1, INS-IGF2, NPNT, FST, F2RL1, PRTG, APOA4, EPCAM, EDNRA, TDGF3, APOB, APOA2, APOA1, GPC3, APOE, RSPO2, TDGF1, SERPINA1, SEPP1, F11R, EFNB2, METTL7A, THBD, PPBP, VEGFA, TFPI, ADAMTS1, PCYOX1, RBP4, ERBB3, HS3ST1, APOC1, CDH1, AHSG, IGF1R, FGG, FGA, FOLR1, FGB, COL6A3, APOC3, COL6A1, LAMB1, FIGF, PCSK5, SPP1, FN1, FLRT2, PODXL, NID1, IGF2, HGF, NID2, FZD2, FRZB, COL5A2, FZD7, A…	164	3250	19235	2.34573	2.47935e-09	1.23967e-09	1.07117e-08
SP_PIR_KEYWORDS	Secreted	42	24.8521	4.35929e-10	RBP4, NRP1, COL21A1, INS-IGF2, ERBB3, NPNT, FST, APOC1, AHSG, APOA4, APOB, FGG, APOA2, APOA1, GPC3, FGA, FOLR1, APOE, FGB, RSPO2, APOC3, COL6A3, COL6A1, SERPINA1, SEPP1, LAMB1, FIGF, PCSK5, FN1, SPP1, HAPLN1, IGF2, NID1, NID2, FRZB, COL5A2, AFP, PPBP, VEGFA, TFPI, TGFBR3, ADAMTS1, IGFBP3	164	1689	19235	2.91654	1.35574e-07	3.38935e-08	5.85731e-07
SP_PIR_KEYWORDS	glycoprotein	69	40.8284	2.73835e-08	IGDCC3, NRP1, COL21A1, INS-IGF2, PRTG, FST, F2RL1, AQP1, EPCAM, EDNRA, TDGF3, APOB, APOA1, GPC3, SLC2A3, APOE, SLC2A1, RSPO2, TDGF1, SERPINA1, SEPP1, F11R, BST2, EFNB2, WNK1, THBD, VEGFA, TFPI, ADAMTS1, PCYOX1, SLC40A1, HS3ST3B1, ERBB3, SLC2A14, HS3ST1, CDH1, AHSG, IGF1R, FGG, FGA, FGB, FOLR1, COL6A3, APOC3, COL6A1, LAMB1, FIGF, PCSK5, SPP1, FN1, HAPLN1, FLRT2, PODXL, GOLIM4, NID1, IGF2, NID2, HG…	164	4318	19235	1.8742	8.51623e-06	1.70325e-06	3.67935e-05
SP_PIR_KEYWORDS	disulfide bond	47	27.8107	1.4471e-05	IGDCC3, NRP1, INS-IGF2, NPNT, F2RL1, PRTG, FST, EPCAM, EDNRA, TDGF3, APOA2, APOB, RSPO2, TDGF1, F11R, EFNB2, THBD, PPBP, VEGFA, TFPI, ADAMTS1, HS3ST3B1, RBP4, GALNT7, ERBB3, HS3ST1, CDH1, AHSG, IGF1R, FGG, FGA, FGB, FOLR1, COL6A3, LAMB1, FIGF, FN1, HAPLN1, PLP1, NID1, IGF2, FZD2, HGF, NID2, FRZB, FZD7, ITGA9, AFP, IGFBP3	164	2924	19235	1.88525	0.00449042	0.000281243	0.0194421
SP_PIR_KEYWORDS	cell adhesion	16	9.46746	3.19336e-06	FLRT2, NPNT, CDH1, NID1, NID2, ITGA9, DSG2, PKP2, FREM2, PKP4, COL6A3, COL6A1, DSC2, LAMB1, FN1, SPP1	164	422	19235	4.44688	0.000992643	9.0281e-05	0.00429063
SP_PIR_KEYWORDS	growth factor	6	3.5503	0.00519278	TDGF3, PPBP, INS-IGF2, VEGFA, TDGF1, IGF2, HGF, FIGF	164	131	19235	5.3719	0.801935	0.0417145	6.75632
SP_PIR_KEYWORDS	extracellular matrix	13	7.69231	1.04157e-06	HAPLN1, COL21A1, NPNT, NID1, NID2, COL5A2, COL6A3, COL6A1, SERPINA1, ADAMTS1, LAMB1, FN1, SPP1	164	241	19235	6.32666	0.000323875	3.59912e-05	0.00139948
SP_PIR_KEYWORDS	pyroglutamic acid	7	4.14201	2.38961e-06	APOA2, FGB, COL6A3, COL6A1, HGF, COL5A2, FN1	164	46	19235	17.848	0.000742895	7.43143e-05	0.00321073
SP_PIR_KEYWORDS	cell adhesion	16	9.46746	3.19336e-06	FLRT2, NPNT, CDH1, NID1, NID2, ITGA9, DSG2, PKP2, FREM2, PKP4, COL6A3, COL6A1, DSC2, LAMB1, FN1, SPP1	164	422	19235	4.44688	0.000992643	9.0281e-05	0.00429063
SP_PIR_KEYWORDS	cell binding	5	2.95858	6.30786e-06	COL6A3, COL6A1, NID1, LAMB1, SPP1	164	15	19235	39.0955	0.00195983	0.000150893	0.00847515
SP_PIR_KEYWORDS	heparin-binding	6	3.5503	0.000225215	APOB, APOE, VEGFA, RSPO2, ADAMTS1, FN1	164	65	19235	10.8265	0.0676524	0.00317901	0.302183
SP_PIR_KEYWORDS	plasma	16	9.46746	1.9548e-15	RBP4, APOC1, AHSG, APOA4, AFP, FGG, APOA2, APOB, APOA1, FGA, FGB, APOE, APOC3, SERPINA1, SEPP1, FN1	164	93	19235	20.1783	6.21503e-13	6.21503e-13	2.68674e-12
SP_PIR_KEYWORDS	liver	11	6.50888	6.35859e-11	RBP4, APOA2, FGG, APOB, APOA1, FGA, FGB, APOC3, APOC1, SEPP1, AHSG	164	59	19235	21.867	1.97752e-08	6.59174e-09	8.54365e-08
SP_PIR_KEYWORDS	intestine	7	4.14201	4.0056e-08	EPCAM, APOA4, APOA2, APOB, APOA1, APOC3, APOC1	164	24	19235	34.2086	1.24573e-05	2.07624e-06	5.38208e-05
SP_PIR_KEYWORDS	lipid binding	5	2.95858	1.38627e-05	APOA4, APOB, APOA1, APOE, FABP1	164	18	19235	32.5796	0.00430206	0.000307906	0.0186249
SP_PIR_KEYWORDS	lipid transport	7	4.14201	1.40242e-05	APOA4, APOA2, APOB, APOA1, APOE, APOC3, APOC1	164	62	19235	13.242	0.00435206	0.000290729	0.0188418
SP_PIR_KEYWORDS	chylomicron	4	2.36686	9.37748e-05	APOA4, APOB, APOE, APOC3	164	11	19235	42.6497	0.0287441	0.00171414	0.125926
SP_PIR_KEYWORDS	vldl	4	2.36686	0.000124255	APOB, APOE, APOC3, APOC1	164	12	19235	39.0955	0.0379086	0.00193042	0.166825
SP_PIR_KEYWORDS	hdl	4	2.36686	0.00044396	APOA4, APOA2, APOA1, APOE	164	18	19235	26.0637	0.12899	0.00550886	0.594878
SP_PIR_KEYWORDS	lipoprotein	15	8.87574	0.00115718	PLP1, BST2, APOC1, APOA4, TDGF3, APOA2, APOB, GPC3, APOA1, FOLR1, APOE, APOC3, TDGF1, RAC1, TFPI, DSP	164	642	19235	2.74034	0.302388	0.0132482	1.5437
SP_PIR_KEYWORDS	atherosclerosis	3	1.77515	0.00247095	APOB, APOA1, APOE	164	9	19235	39.0955	0.536717	0.0245144	3.26953
SP_PIR_KEYWORDS	blood coagulation	8	4.73373	8.11944e-08	FGG, ANXA8, THBD, FGA, FGB, TFPI, ANXA8L2, SERPINA1	164	44	19235	21.3248	2.52511e-05	3.60734e-06	0.000109096
SP_PIR_KEYWORDS	annexin	3	1.77515	0.00607469	ANXA8, ANXA8L1, ANXA8L2	164	14	19235	25.1328	0.84968	0.0474279	7.86089
SP_PIR_KEYWORDS	calcium/phospholipid-binding	3	1.77515	0.00697045	ANXA8, ANXA8L1, ANXA8L2	164	15	19235	23.4573	0.886437	0.0516755	8.97041
SP_PIR_KEYWORDS	pyroglutamic acid	7	4.14201	2.38961e-06	APOA2, FGB, COL6A3, COL6A1, HGF, COL5A2, FN1	164	46	19235	17.848	0.000742895	7.43143e-05	0.00321073
SP_PIR_KEYWORDS	wnt signaling pathway	6	3.5503	0.00384264	RSPO2, LEF1, FZD2, SLC9A3R1, FRZB, FZD7	164	122	19235	5.76819	0.69801	0.0336318	5.04154
SP_PIR_KEYWORDS	angiogenesis	5	2.95858	0.00238134	NRP1, INS-IGF2, VEGFA, IGF2, FIGF, FN1	164	66	19235	8.88535	0.523592	0.0244131	3.15271
SP_PIR_KEYWORDS	mitogen	4	2.36686	0.00436536	PPBP, INS-IGF2, VEGFA, IGF2, FIGF	164	39	19235	12.0294	0.743493	0.0370891	5.70886
SP_PIR_KEYWORDS	growth factor	6	3.5503	0.00519278	TDGF3, PPBP, INS-IGF2, VEGFA, TDGF1, IGF2, HGF, FIGF	164	131	19235	5.3719	0.801935	0.0417145	6.75632
SP_PIR_KEYWORDS	oxygen carrier	3	1.77515	0.00193259	HBG1, HBG2, HBE1	164	8	19235	43.9825	0.452076	0.0205317	2.56573
SP_PIR_KEYWORDS	blood	3	1.77515	0.00373326	HBG1, HBG2, HBE1	164	11	19235	31.9873	0.68752	0.0336336	4.90134
SP_PIR_KEYWORDS	oxygen transport	3	1.77515	0.00445506	HBG1, HBG2, HBE1	164	12	19235	29.3216	0.75058	0.0368347	5.82294
SP_PIR_KEYWORDS	isopeptide bond	11	6.50888	0.000402472	FGG, MLL, FGA, ETS1, PKP4, LEF1, PCYOX1, SOX6, KPNB1, RBM25, FN1	164	319	19235	4.04437	0.117674	0.00520283	0.539425
SP_PIR_KEYWORDS	wnt signaling pathway	6	3.5503	0.00384264	RSPO2, LEF1, FZD2, SLC9A3R1, FRZB, FZD7	164	122	19235	5.76819	0.69801	0.0336318	5.04154
SP_PIR_KEYWORDS	Cardiomyopathy	4	2.36686	0.00781601	DSG2, PKP2, DSP, DSC2	164	48	19235	9.77388	0.912868	0.0564473	10.0064
UP_SEQ_FEATURE	signal peptide	65	38.4615	1.05908e-11	IGDCC3, NRP1, COL21A1, INS-IGF2, NPNT, FST, F2RL1, PRTG, APOA4, EPCAM, EDNRA, TDGF3, APOB, APOA2, APOA1, GPC3, APOE, RSPO2, TDGF1, SERPINA1, SEPP1, F11R, EFNB2, METTL7A, THBD, PPBP, VEGFA, TFPI, ADAMTS1, PCYOX1, RBP4, ERBB3, HS3ST1, APOC1, CDH1, AHSG, IGF1R, FGG, FGA, FOLR1, FGB, COL6A3, APOC3, COL6A1, LAMB1, FIGF, PCSK5, SPP1, FN1, FLRT2, PODXL, NID1, IGF2, HGF, NID2, FZD2, FRZB, COL5A2, FZD7, A…	164	3250	19113	2.33085	9.22454e-09	9.22454e-09	1.64384e-08
UP_SEQ_FEATURE	glycosylation site:N-linked (GlcNAc...)	63	37.2781	1.23692e-06	IGDCC3, NRP1, COL21A1, FST, F2RL1, PRTG, AQP1, EDNRA, EPCAM, TDGF3, APOB, GPC3, SLC2A3, SLC2A1, RSPO2, TDGF1, SERPINA1, SEPP1, F11R, BST2, EFNB2, THBD, VEGFA, TFPI, ADAMTS1, PCYOX1, SLC40A1, HS3ST3B1, ERBB3, SLC2A14, HS3ST1, CDH1, AHSG, IGF1R, FGG, FGA, FOLR1, FGB, COL6A3, COL6A1, LAMB1, FIGF, PCSK5, SPP1, FN1, HAPLN1, FLRT2, PODXL, GOLIM4, NID1, NID2, FZD2, FRZB, COL5A2, FZD7, AFP, ITGA9, DSG2, …	164	4129	19113	1.7782	0.00107677	0.000538532	0.00191986
UP_SEQ_FEATURE	disulfide bond	46	27.2189	1.50683e-05	RBP4, IGDCC3, NRP1, GALNT7, INS-IGF2, ERBB3, NPNT, FST, PRTG, HS3ST1, F2RL1, CDH1, AHSG, EDNRA, EPCAM, IGF1R, TDGF3, APOB, FGG, APOA2, FGA, FGB, COL6A3, TDGF1, RSPO2, LAMB1, FIGF, FN1, F11R, HAPLN1, PLP1, EFNB2, IGF2, NID1, NID2, HGF, FZD2, FRZB, FZD7, AFP, ITGA9, THBD, PPBP, VEGFA, TFPI, ADAMTS1, IGFBP3, HS3ST3B1	164	2819	19113	1.90173	0.0130388	0.00327577	0.0233857
UP_SEQ_FEATURE	short sequence motif:Cell attachment site	7	4.14201	0.000106762	COL6A3, COL6A1, NID1, COL5A2, PCSK5, SPP1, FN1	164	88	19113	9.27044	0.0888016	0.018427	0.165582
UP_SEQ_FEATURE	domain:Thyroglobulin type-1	3	1.77515	0.00530086	EPCAM, NID1, IGFBP3	164	13	19113	26.8945	0.990239	0.439354	7.91849
UP_SEQ_FEATURE	region of interest:Defines substrate specificity	3	1.77515	0.000428873	SLC2A3, SLC2A14, SLC2A1	164	4	19113	87.407	0.311767	0.0603722	0.663604
UP_SEQ_FEATURE	glycosylation site:O-linked (GalNAc...)	8	4.73373	1.37542e-05	INS-IGF2, APOE, APOC3, TFPI, IGF2, HGF, SPP1, AHSG, FN1	164	92	19113	10.1341	0.0119086	0.00398538	0.0213465
UP_SEQ_FEATURE	repeat:Annexin 4	3	1.77515	0.00614986	ANXA8, ANXA8L1, ANXA8L2	164	14	19113	24.9734	0.99536	0.449544	9.13085
UP_SEQ_FEATURE	repeat:Annexin 1	3	1.77515	0.00614986	ANXA8, ANXA8L1, ANXA8L2	164	14	19113	24.9734	0.99536	0.449544	9.13085
UP_SEQ_FEATURE	repeat:Annexin 3	3	1.77515	0.00614986	ANXA8, ANXA8L1, ANXA8L2	164	14	19113	24.9734	0.99536	0.449544	9.13085
UP_SEQ_FEATURE	repeat:Annexin 2	3	1.77515	0.00614986	ANXA8, ANXA8L1, ANXA8L2	164	14	19113	24.9734	0.99536	0.449544	9.13085
UP_SEQ_FEATURE	short sequence motif:Cell attachment site	7	4.14201	0.000106762	COL6A3, COL6A1, NID1, COL5A2, PCSK5, SPP1, FN1	164	88	19113	9.27044	0.0888016	0.018427	0.165582
UP_SEQ_FEATURE	metal ion-binding site:Iron (heme distal ligand)	3	1.77515	0.00451051	HBG1, HBG2, HBE1	164	12	19113	29.1357	0.980504	0.43022	6.77628
UP_SEQ_FEATURE	metal ion-binding site:Iron (heme proximal ligand)	3	1.77515	0.00705646	HBG1, HBG2, HBE1	164	15	19113	23.3085	0.997905	0.429204	10.409
UP_SEQ_FEATURE	site:Reactive bond	4	2.36686	0.00664676	SERPINB9, COL6A3, TFPI, SERPINA1	164	45	19113	10.3593	0.996999	0.440586	9.83347

## Sheet: Table S6E_T_70uM_Up
Category	Term	Count	%	PValue	Genes	List Total	Pop Hits	Pop Total	Fold Enrichment	Bonferroni	Benjamini	FDR
GOTERM_BP_ALL	GO:0007267~cell-cell signaling	19	0.1218	2.50081e-06	SST, CCL2, DTNA, ADM, SYT4, HTR2C, GAD1, CRH, SNAP25, S100B, PCSK1, CARTPT, NR4A2, GABBR2, STC1, FGF11, RAPGEF4, TAC1, STC2,	118	661	15360	3.74163	0.0130533	0.00109434	0.0047839
GOTERM_BP_ALL	GO:0007268~synaptic transmission	12	0.0769	2.05272e-05	CRH, SST, CARTPT, S100B, SNAP25, DTNA, NR4A2, GABBR2, SYT4, TAC1, HTR2C, GAD1,	118	304	15360	5.13827	0.102238	0.00716427	0.0392608
GOTERM_BP_ALL	GO:0019226~transmission of nerve impulse	12	0.0769	7.02439e-05	CRH, SST, CARTPT, S100B, SNAP25, DTNA, NR4A2, GABBR2, SYT4, TAC1, HTR2C, GAD1,	118	348	15360	4.4886	0.308626	0.0228031	0.13429
GOTERM_BP_ALL	GO:0001505~regulation of neurotransmitter levels	5	0.0321	0.00323998	CARTPT, SNAP25, NR4A2, SYT4, GAD1,	118	80	15360	8.13559	1	0.43354	6.01931
GOTERM_BP_ALL	GO:0006096~glycolysis	10	0.0641	9.14553e-10	ALDOA, PFKP, PKM2, HK1, LDHA, GPI, TPI1, ENO2, PGK1, HK2,	118	62	15360	20.9951	4.80505e-06	4.80505e-06	1.74953e-06
GOTERM_BP_ALL	GO:0006007~glucose catabolic process	10	0.0641	3.60099e-09	ALDOA, PFKP, PKM2, HK1, LDHA, GPI, TPI1, ENO2, PGK1, HK2,	118	72	15360	18.0791	1.89194e-05	9.45974e-06	6.88863e-06
GOTERM_BP_ALL	GO:0019320~hexose catabolic process	10	0.0641	1.29684e-08	ALDOA, PFKP, PKM2, HK1, LDHA, GPI, TPI1, ENO2, PGK1, HK2,	118	83	15360	15.6831	6.81339e-05	2.27118e-05	2.48084e-05
GOTERM_BP_ALL	GO:0046365~monosaccharide catabolic process	10	0.0641	1.44327e-08	ALDOA, PFKP, PKM2, HK1, LDHA, GPI, TPI1, ENO2, PGK1, HK2,	118	84	15360	15.4964	7.58268e-05	1.89572e-05	2.76096e-05
GOTERM_BP_ALL	GO:0046164~alcohol catabolic process	10	0.0641	1.78011e-08	ALDOA, PFKP, PKM2, HK1, LDHA, GPI, TPI1, ENO2, PGK1, HK2,	118	86	15360	15.136	9.35229e-05	1.87053e-05	3.40533e-05
GOTERM_BP_ALL	GO:0006006~glucose metabolic process	11	0.0705	2.17785e-08	ALDOA, PFKP, PKM2, HK1, PDK1, LDHA, GPI, TPI1, ENO2, PGK1, HK2,	118	118	15360	12.1344	0.000114418	1.90705e-05	4.16619e-05
GOTERM_BP_ALL	GO:0019318~hexose metabolic process	12	0.0769	5.11457e-08	ALDOA, PFKP, PKM2, HK1, PDK1, LDHA, PFKFB3, GPI, TPI1, ENO2, PGK1, HK2,	118	165	15360	9.46687	0.000268683	3.83877e-05	9.78408e-05
GOTERM_BP_ALL	GO:0005996~monosaccharide metabolic process	12	0.0769	6.95108e-08	ALDOA, PFKP, PKM2, HK1, PDK1, LDHA, PFKFB3, GPI, TPI1, ENO2, PGK1, HK2,	118	170	15360	9.18843	0.000365143	4.56502e-05	0.000132973
GOTERM_BP_ALL	GO:0044275~cellular carbohydrate catabolic process	10	0.0641	1.54347e-07	ALDOA, PFKP, PKM2, HK1, LDHA, GPI, TPI1, ENO2, PGK1, HK2,	118	110	15360	11.8336	0.000810612	9.01005e-05	0.000295264
GOTERM_BP_ALL	GO:0006066~alcohol metabolic process	15	0.0962	1.57284e-07	ABCG1, PDK1, PFKFB3, GPI, PGK1, PFKP, ALDOA, PKM2, HK1, NR4A2, LDHA, INSIG2, TPI1, ENO2, HK2,	118	322	15360	6.0638	0.000826031	8.26338e-05	0.000300882
GOTERM_BP_ALL	GO:0016052~carbohydrate catabolic process	10	0.0641	2.62603e-07	ALDOA, PFKP, PKM2, HK1, LDHA, GPI, TPI1, ENO2, PGK1, HK2,	118	117	15360	11.1256	0.00137877	0.000125421	0.000502355
GOTERM_BP_ALL	GO:0044262~cellular carbohydrate metabolic process	14	0.0897	2.61829e-06	PDK1, PFKFB3, GPI, GBE1, PGK1, GAD1, PFKP, ALDOA, PKM2, HK1, LDHA, TPI1, ENO2, HK2,	118	350	15360	5.20678	0.0136623	0.00105764	0.00500864
GOTERM_BP_ALL	GO:0005975~carbohydrate metabolic process	17	0.109	3.53722e-06	ABO, PDK1, PFKFB3, GPI, RIMS3, GBE1, PGK1, GAD1, ALDOA, PFKP, PKM2, SLC2A3, HK1, LDHA, TPI1, ENO2, HK2,	118	543	15360	4.07529	0.0184129	0.00132659	0.00676642
GOTERM_BP_ALL	GO:0044248~cellular catabolic process	14	0.0897	0.00060731	ALDH1L2, GPI, DPYD, PGK1, GAD1, BNIP3, PFKP, ALDOA, PKM2, HK1, LDHA, TPI1, ENO2, HK2,	118	596	15360	3.05767	0.958901	0.147506	1.1554
GOTERM_BP_ALL	GO:0044265~cellular macromolecule catabolic process	10	0.0641	0.00148157	ALDOA, PFKP, PKM2, HK1, LDHA, GPI, TPI1, ENO2, PGK1, HK2,	118	352	15360	3.698	0.999586	0.250626	2.79648
GOTERM_BP_ALL	GO:0009057~macromolecule catabolic process	11	0.0705	0.00205431	BNIP3, ALDOA, PFKP, PKM2, HK1, LDHA, GPI, TPI1, ENO2, PGK1, HK2,	118	443	15360	3.2322	0.99998	0.320143	3.85753
GOTERM_BP_ALL	GO:0009056~catabolic process	14	0.0897	0.00443544	ALDH1L2, GPI, DPYD, PGK1, GAD1, BNIP3, PFKP, ALDOA, PKM2, HK1, LDHA, TPI1, ENO2, HK2,	118	746	15360	2.44286	1	0.52924	8.15226
GOTERM_BP_ALL	GO:0048856~anatomical structure development	33	0.2115	0.000111365	IGFBP2, LOX, ITGA4, SGCD, COL11A1, SLITRK6, TNC, CRH, CARTPT, IGFBP5, EMX2, GNAO1, CCL2, CA2, VEGFA, ADM, GPI, SCG2, EGR1, SPAG6, RHOJ, S100B, NR4A2, ADAM12, MAPT, CDC42, DLX2, FGF11, COL12A1, MAFF, NDRG4, SCRG1, L1CAM,	118	2153	15360	1.99517	0.442974	0.0338345	0.212824
GOTERM_BP_ALL	GO:0048731~system development	27	0.1731	0.000640419	LOX, ITGA4, COL11A1, SLITRK6, SGCD, CRH, TNC, CARTPT, EMX2, GNAO1, CCL2, VEGFA, ADM, GPI, SCG2, EGR1, S100B, NR4A2, ADAM12, MAPT, CDC42, DLX2, FGF11, COL12A1, MAFF, SCRG1, L1CAM,	118	1760	15360	1.99692	0.965467	0.148093	1.21803
GOTERM_BP_ALL	GO:0032502~developmental process	41	0.2628	0.00079193	SST, IGFBP2, LOX, ITGA4, SGCD, COL11A1, SLITRK6, TNC, CRH, CARTPT, IGFBP5, EMX2, SPATA18, GNAO1, ANXA1, CCL2, CA2, VEGFA, DDIT4, ADM, GPI, SCG2, EGR1, PPP2R2B, SPAG6, ATF5, RHOJ, BNIP3, S100B, ADAM12, NR4A2, MAPT, CDC42, DLX2, MAFF, COL12A1, FGF11, DLX1, SCRG1, NDRG4, L1CAM,	118	3262	15360	1.6361	0.984431	0.172381	1.50412
GOTERM_BP_ALL	GO:0032501~multicellular organismal process	45	0.2885	0.0010407	SST, DTNA, AKR1C1, LOX, ITGA4, SGCD, COL11A1, SLITRK6, TNC, CRH, CARTPT, ALDOA, GNAS, NMU, EMX2, SPATA18, GNAO1, KCNJ12, RORA, TAC1, CCL2, VEGFA, ADM, GPI, SCG2, EGR1, SYT4, HTR2C, GAD1, SNAP25, S100B, ADAM12, NR4A2, GABBR2, MAPT, CDC42, DLX2, MAFF, COL12A1, FGF11, DLX1, SCRG1, NDRG4, HK2, L1CAM,	118	3759	15360	1.55829	0.995792	0.203832	1.97217
GOTERM_BP_ALL	GO:0030154~cell differentiation	27	0.1731	0.00119278	SST, SLITRK6, TNC, CARTPT, EMX2, SPATA18, GNAO1, ANXA1, CCL2, VEGFA, DDIT4, SCG2, EGR1, PPP2R2B, SPAG6, ATF5, BNIP3, S100B, NR4A2, ADAM12, MAPT, CDC42, DLX2, MAFF, DLX1, NDRG4, L1CAM,	118	1835	15360	1.9153	0.998109	0.214298	2.25727
GOTERM_BP_ALL	GO:0048869~cellular developmental process	27	0.1731	0.00119278	SST, SLITRK6, TNC, CARTPT, EMX2, SPATA18, GNAO1, ANXA1, CCL2, VEGFA, DDIT4, SCG2, EGR1, PPP2R2B, SPAG6, ATF5, BNIP3, S100B, NR4A2, ADAM12, MAPT, CDC42, DLX2, MAFF, DLX1, NDRG4, L1CAM,	118	1835	15360	1.9153	0.998109	0.214298	2.25727
GOTERM_BP_ALL	GO:0007275~multicellular organismal development	30	0.1923	0.00485333	LOX, ITGA4, COL11A1, SLITRK6, SGCD, CRH, TNC, CARTPT, EMX2, SPATA18, GNAO1, CCL2, VEGFA, ADM, GPI, SCG2, EGR1, S100B, NR4A2, ADAM12, MAPT, CDC42, DLX2, FGF11, COL12A1, MAFF, DLX1, NDRG4, SCRG1, L1CAM,	118	2349	15360	1.66245	1	0.528487	8.88698
GOTERM_BP_ALL	GO:0007154~cell communication	50	0.3205	0.000293167	SST, GRIA4, IFITM1, ITGA4, IGFBP5, GNAO1, RORA, STC2, RASGRF2, VEGFA, DDIT4, SCG2, RHOJ, NR4A2, GABRG2, FGF11, GPR155, IGFBP2, DTNA, PCSK1N, CNTN1, PDK1, KISS1R, LOX, WDR5B, CRH, TNC, PCSK1, CARTPT, PDE1C, GNAS, NMU, STC1, RAPGEF4, TAC1, ANXA1, CCL2, RAB40B, ADM, DUSP4, SYT4, PPP2R2B, HTR2C, GAD1, BNIP3, S100B, SNAP25, RP13-102H20.1, GABBR2, CDC42,	118	4123	15360	1.57858	0.785732	0.0778803	0.559336
GOTERM_BP_ALL	GO:0007165~signal transduction	45	0.2885	0.00103467	SST, IGFBP2, DTNA, PCSK1N, PDK1, CNTN1, GRIA4, KISS1R, LOX, ITGA4, IFITM1, WDR5B, TNC, CRH, CARTPT, IGFBP5, PDE1C, GNAS, NMU, STC1, GNAO1, RAPGEF4, RORA, TAC1, ANXA1, STC2, RASGRF2, CCL2, RAB40B, VEGFA, DDIT4, ADM, SCG2, DUSP4, PPP2R2B, HTR2C, RHOJ, BNIP3, RP13-102H20.1, NR4A2, GABBR2, GABRG2, CDC42, FGF11, GPR155,	118	3758	15360	1.55871	0.995656	0.210597	1.96086
GOTERM_BP_ALL	GO:0031667~response to nutrient levels	4	0.0256	0.00980461	SST, CARTPT, STC1, STC2,	118	58	15360	8.97721	1	0.734827	17.1788
GOTERM_BP_ALL	GO:0046903~secretion	10	0.0641	0.00236294	CARTPT, SNAP25, CA2, GNAS, ADM, SCG2, RIMS3, RAPGEF4, SYT4, ANXA1,	118	377	15360	3.45277	0.999996	0.348583	4.42474
GOTERM_BP_ALL	GO:0001505~regulation of neurotransmitter levels	5	0.0321	0.00323998	CARTPT, SNAP25, NR4A2, SYT4, GAD1,	118	80	15360	8.13559	1	0.43354	6.01931
GOTERM_BP_ALL	GO:0007610~behavior	11	0.0705	0.000203402	CRH, CCL2, CARTPT, S100B, VEGFA, CALB1, SCG2, EGR1, GNAO1, KISS1R, HTR2C,	118	328	15360	4.36544	0.656574	0.0576484	0.388389
GOTERM_BP_ALL	GO:0032502~developmental process	41	0.2628	0.00079193	SST, IGFBP2, LOX, ITGA4, SGCD, COL11A1, SLITRK6, TNC, CRH, CARTPT, IGFBP5, EMX2, SPATA18, GNAO1, ANXA1, CCL2, CA2, VEGFA, DDIT4, ADM, GPI, SCG2, EGR1, PPP2R2B, SPAG6, ATF5, RHOJ, BNIP3, S100B, ADAM12, NR4A2, MAPT, CDC42, DLX2, MAFF, COL12A1, FGF11, DLX1, SCRG1, NDRG4, L1CAM,	118	3262	15360	1.6361	0.984431	0.172381	1.50412
GOTERM_BP_ALL	GO:0030154~cell differentiation	27	0.1731	0.00119278	SST, SLITRK6, TNC, CARTPT, EMX2, SPATA18, GNAO1, ANXA1, CCL2, VEGFA, DDIT4, SCG2, EGR1, PPP2R2B, SPAG6, ATF5, BNIP3, S100B, NR4A2, ADAM12, MAPT, CDC42, DLX2, MAFF, DLX1, NDRG4, L1CAM,	118	1835	15360	1.9153	0.998109	0.214298	2.25727
GOTERM_BP_ALL	GO:0048869~cellular developmental process	27	0.1731	0.00119278	SST, SLITRK6, TNC, CARTPT, EMX2, SPATA18, GNAO1, ANXA1, CCL2, VEGFA, DDIT4, SCG2, EGR1, PPP2R2B, SPAG6, ATF5, BNIP3, S100B, NR4A2, ADAM12, MAPT, CDC42, DLX2, MAFF, DLX1, NDRG4, L1CAM,	118	1835	15360	1.9153	0.998109	0.214298	2.25727
GOTERM_BP_ALL	GO:0048468~cell development	19	0.1218	0.0060937	SST, CCL2, VEGFA, DDIT4, SCG2, PPP2R2B, SLITRK6, SPAG6, ATF5, TNC, BNIP3, S100B, ADAM12, NR4A2, MAPT, EMX2, DLX1, GNAO1, ANXA1,	118	1245	15360	1.98652	1	0.59019	11.0351
GOTERM_BP_ALL	GO:0043066~negative regulation of apoptosis	7	0.0449	0.008324	BNIP3, CCL2, VEGFA, SCG2, DLX1, ANXA1, ATF5,	118	230	15360	3.96168	1	0.694851	14.7774
GOTERM_BP_ALL	GO:0043069~negative regulation of programmed cell death	7	0.0449	0.00884194	BNIP3, CCL2, VEGFA, SCG2, DLX1, ANXA1, ATF5,	118	233	15360	3.91067	1	0.707108	15.6248
GOTERM_BP_ALL	GO:0000902~cell morphogenesis	11	0.0705	0.00479473	IGFBP5, S100B, IGFBP2, VEGFA, MAPT, CDC42, GNAO1, NDRG4, SPAG6, SLITRK6, RHOJ,	118	499	15360	2.86947	1	0.534766	8.78428
GOTERM_BP_ALL	GO:0032989~cellular structure morphogenesis	11	0.0705	0.00479473	IGFBP5, S100B, IGFBP2, VEGFA, MAPT, CDC42, GNAO1, NDRG4, SPAG6, SLITRK6, RHOJ,	118	499	15360	2.86947	1	0.534766	8.78428
GOTERM_BP_ALL	GO:0048878~chemical homeostasis	8	0.0513	0.00508911	BNIP3, CCL2, CARTPT, S100B, ABCG1, AKR1C1, STC1, TAC1,	118	275	15360	3.78675	1	0.535084	9.29906
GOTERM_BP_ALL	GO:0043066~negative regulation of apoptosis	7	0.0449	0.008324	BNIP3, CCL2, VEGFA, SCG2, DLX1, ANXA1, ATF5,	118	230	15360	3.96168	1	0.694851	14.7774
GOTERM_BP_ALL	GO:0043069~negative regulation of programmed cell death	7	0.0449	0.00884194	BNIP3, CCL2, VEGFA, SCG2, DLX1, ANXA1, ATF5,	118	233	15360	3.91067	1	0.707108	15.6248
GOTERM_CC_ALL	GO:0044421~extracellular region part	20	0.1282	1.53375e-05	SST, CCL2, TTR, IGFBP2, VEGFA, IL13RA2, PCSK1N, ADM, GPI, SCG2, LOX, SGCD, COL11A1, TNC, CARTPT, STC1, FGF11, COL12A1, SCRG1, TAC1,	123	819	15857	3.1482	0.0132248	0.0132248	0.0237927
GOTERM_CC_ALL	GO:0005576~extracellular region	26	0.1667	2.94025e-05	SST, IGFBP2, PCSK1N, ABO, LOX, COL11A1, SGCD, CRH, TNC, IGFBP5, CARTPT, GNAS, STC1, TAC1, STC2, TTR, CCL2, VEGFA, IL13RA2, ADM, GPI, SCG2, S100B, FGF11, COL12A1, SCRG1,	123	1350	15857	2.48288	0.0251988	0.0126798	0.0456069
GOTERM_CC_ALL	GO:0005615~extracellular space	15	0.0962	4.74212e-05	SST, CCL2, TTR, IGFBP2, VEGFA, IL13RA2, PCSK1N, ADM, GPI, SCG2, CARTPT, STC1, FGF11, SCRG1, TAC1,	123	521	15857	3.71167	0.0403269	0.0136271	0.0735463
GOTERM_CC_ALL	GO:0005576~extracellular region	26	0.1667	2.94025e-05	SST, IGFBP2, PCSK1N, ABO, LOX, COL11A1, SGCD, CRH, TNC, IGFBP5, CARTPT, GNAS, STC1, TAC1, STC2, TTR, CCL2, VEGFA, IL13RA2, ADM, GPI, SCG2, S100B, FGF11, COL12A1, SCRG1,	123	1350	15857	2.48288	0.0251988	0.0126798	0.0456069
GOTERM_CC_ALL	GO:0045202~synapse	10	0.0641	6.69619e-05	SNAP25, SVOP, DTNA, GABBR2, GABRG2, GRIA4, SLC32A1, RIMS3, SYT4, GAD1,	123	228	15857	5.65433	0.0564679	0.0144262	0.103838
GOTERM_MF_ALL	GO:0005102~receptor binding	17	0.109	0.000154885	SST, CCL2, TTR, VEGFA, PCSK1N, ADM, GPI, SCG2, DOK5, CRH, TNC, GNAS, NMU, STC1, FGF11, ANXA1, STC2,	119	811	16968	2.9889	0.359685	0.199803	0.277245
GOTERM_MF_ALL	GO:0019200~carbohydrate kinase activity	4	0.0256	0.00127853	PFKP, HK1, PFKFB3, HK2,	119	31	16968	18.3985	0.974826	0.601675	2.26694
GOTERM_MF_ALL	GO:0005179~hormone activity	6	0.0385	0.00193474	CRH, TTR, SST, ADM, STC1, STC2,	119	127	16968	6.73645	0.996203	0.671991	3.41153
GOTERM_MF_ALL	GO:0019842~vitamin binding	6	0.0385	0.00333509	TTR, CALB1, ALDH1L2, P4HA1, P4HA2, GAD1,	119	144	16968	5.94118	0.999933	0.798589	5.8119
KEGG_PATHWAY	hsa00010:Glycolysis / Gluconeogenesis	10	0.0641	2.96024e-08	ALDOA, PFKP, PKM2, HK1, LDHA, GPI, TPI1, ENO2, PGK1, HK2,	53	60	4214	13.2516	5.95006e-06	5.95006e-06	3.71338e-05
KEGG_PATHWAY	hsa00051:Fructose and mannose metabolism	6	0.0385	0.000141668	ALDOA, PFKP, HK1, PFKFB3, TPI1, HK2,	53	42	4214	11.3585	0.0280755	0.0141377	0.177565
KEGG_PATHWAY	hsa00710:Carbon fixation	4	0.0256	0.00263723	ALDOA, PKM2, TPI1, PGK1,	53	23	4214	13.8277	0.411856	0.16216	3.2583
SP_PIR_KEYWORDS	glycolysis	10	0.0641	4.63869e-11	ALDOA, PFKP, PKM2, HK1, LDHA, GPI, TPI1, ENO2, PGK1, HK2,	132	46	17599	28.9839	4.94484e-08	4.94484e-08	7.38869e-08
SP_PIR_KEYWORDS	Allosteric enzyme	4	0.0256	0.00155565	PFKP, PKM2, HK1, HK2,	132	31	17599	17.2033	0.809787	0.152921	2.44933
SP_PIR_KEYWORDS	phosphotransferase	7	0.0449	0.00332377	PFKP, PKM2, HK1, PDK1, PFKFB3, PGK1, HK2,	132	194	17599	4.81072	0.971248	0.275765	5.16489
SP_PIR_KEYWORDS	signal	37	0.2372	0.00112024	SST, IGFBP2, CNTN1, GRIA4, LOX, ITGA4, COL11A1, SLITRK6, P4HA2, TNC, CRH, CARTPT, PCSK1, IGFBP5, NRN1, OMG, STC1, SEZ6L2, TAC1, STC2, TTR, CCL2, VEGFA, IL13RA2, P4HA1, ADM, C20orf103, SCG2, CACNA2D3, ADAM12, GABBR2, GABRG2, CDH19, COL12A1, SCRG1, OPCML, L1CAM,	132	2919	17599	1.68998	0.697248	0.138737	1.76952
SP_PIR_KEYWORDS	hormone	6	0.0385	0.000431138	CRH, TTR, SST, ADM, STC1, STC2,	132	85	17599	9.41123	0.368522	0.0737539	0.684528
SP_PIR_KEYWORDS	cell adhesion	9	0.0577	0.00831989	TNC, ADAM12, OMG, CNTN1, COL12A1, CDH19, OPCML, ITGA4, L1CAM,	132	386	17599	3.10863	0.999864	0.447742	12.4602
SP_PIR_KEYWORDS	synapse	8	0.0513	0.000326514	SNAP25, SVOP, DTNA, GABBR2, GABRG2, GRIA4, RIMS3, SYT4,	132	174	17599	6.12992	0.293987	0.0672558	0.518819
SP_PIR_KEYWORDS	cell junction	8	0.0513	0.00787865	SNAP25, SVOP, DTNA, GABBR2, GABRG2, GRIA4, RIMS3, SYT4,	132	305	17599	3.49707	0.999782	0.452438	11.8377
SP_PIR_KEYWORDS	lipoprotein	14	0.0897	0.000679955	RAB40B, GRIA4, CNTN1, RHOJ, BAALC, SNAP25, NRN1, GBP1, GNAS, GABRG2, OMG, CDC42, GNAO1, OPCML,	132	615	17599	3.03506	0.515713	0.0983985	1.07758
UP_SEQ_FEATURE	signal peptide	35	0.2244	0.00540661	SST, IGFBP2, GRIA4, CNTN1, LOX, ITGA4, P4HA2, COL11A1, SLITRK6, TNC, CRH, CARTPT, PCSK1, IGFBP5, OMG, STC1, SEZ6L2, TAC1, STC2, TTR, CCL2, VEGFA, IL13RA2, P4HA1, ADM, C20orf103, SCG2, ADAM12, GABBR2, GABRG2, CDH19, COL12A1, SCRG1, OPCML, L1CAM,	111	2447	12056	1.55351	1	1	11.0932
UP_SEQ_FEATURE	binding site:Substrate	7	0.0449	0.00145788	ALDOA, PFKP, AKR1C1, LDHA, TPI1, ENO2, PGK1,	111	135	12056	5.63177	1	1	3.11475
UP_SEQ_FEATURE	signal peptide	35	0.2244	0.00540661	SST, IGFBP2, GRIA4, CNTN1, LOX, ITGA4, P4HA2, COL11A1, SLITRK6, TNC, CRH, CARTPT, PCSK1, IGFBP5, OMG, STC1, SEZ6L2, TAC1, STC2, TTR, CCL2, VEGFA, IL13RA2, P4HA1, ADM, C20orf103, SCG2, ADAM12, GABBR2, GABRG2, CDH19, COL12A1, SCRG1, OPCML, L1CAM,	111	2447	12056	1.55351	1	1	11.0932
UP_SEQ_FEATURE	domain:Fibronectin type-III 3	5	0.0321	0.00203038	TNC, CNTN1, COL12A1, HCFC2, L1CAM,	111	59	12056	9.20446	1	1	4.31241
UP_SEQ_FEATURE	domain:Fibronectin type-III 4	4	0.0256	0.00746007	TNC, CNTN1, COL12A1, L1CAM,	111	44	12056	9.87387	1	1	14.9905

## Sheet: Table S6F_T_70uM_down
Category	Term	Count	%	PValue	Genes	List Total	Pop Hits	Pop Total	Fold Enrichment	Bonferroni	Benjamini	FDR
GOTERM_BP_ALL	GO:0007049~cell cycle	90	0.1613	2.5307e-23	FANCD2, CDC25A, DHCR24, GTSE1, SPIN1, ZWINT, KRAS, APPL1, PBK, MCM6, DBF4, CENPF, FBXO5, KNTC1, ASPM, KRT18, SPC25, PLAGL1, FANCI, NEK2, RAD21, RBBP8, NCAPG, NBN, CCNB1, KIF23, RIF1, UHRF1, ESCO2, STAG2, ANLN, E2F8, ERBB2IP, NUF2, HGF, CDCA3, CHEK1, HELLS, CDK6, RBBP4, C13orf15, CCNB2, TCF7L2, E2F7, EXT1, TIMELESS, TERF1, FIGF, MCM8, IGF2, CDC2, CEP55, NASP, IGF1R, RBL1, TTK, JUB, GAS2L3, PTN, TP…	479	894	15360	3.2282	1.32963e-19	1.32963e-19	4.84119e-20
GOTERM_BP_ALL	GO:0007067~mitosis	43	0.0771	4.35617e-21	CDC25A, TIMELESS, TERF1, CDC2, GTSE1, CEP55, ZWINT, TTK, PBK, CENPF, FBXO5, TPX2, KNTC1, ASPM, CENPE, SPC25, NEK2, RAD21, NUSAP1, NEK1, NDC80, KIF15, NCAPG, NBN, SMC4, CCNB1, BUB1B, KIF23, BUB3, MAD2L1, STAG2, ANLN, NUF2, DLG1, HGF, KIF2C, KIF11, CDCA3, SMC1A, HELLS, SPAG5, BUB1, CCNB2,	479	227	15360	6.07433	2.28873e-17	1.14437e-17	8.33329e-18
GOTERM_BP_ALL	GO:0000087~M phase of mitotic cell cycle	43	0.0771	6.16775e-21	CDC25A, TIMELESS, TERF1, CDC2, GTSE1, CEP55, ZWINT, TTK, PBK, CENPF, FBXO5, TPX2, KNTC1, ASPM, CENPE, SPC25, NEK2, RAD21, NUSAP1, NEK1, NDC80, KIF15, NCAPG, NBN, SMC4, CCNB1, BUB1B, KIF23, BUB3, MAD2L1, STAG2, ANLN, NUF2, DLG1, HGF, KIF2C, KIF11, CDCA3, SMC1A, HELLS, SPAG5, BUB1, CCNB2,	479	229	15360	6.02128	3.24054e-17	1.08018e-17	1.17988e-17
GOTERM_BP_ALL	GO:0000278~mitotic cell cycle	48	0.086	2.78276e-19	CDC25A, TIMELESS, TERF1, CDC2, GTSE1, CEP55, ZWINT, TTK, PBK, DBF4, CENPF, FBXO5, TPX2, SKP2, KNTC1, ASPM, CENPE, SPC25, NEK2, RAD21, NUSAP1, NEK1, KIF15, NDC80, NCAPG, NBN, SMC4, CCNB1, BUB1B, KIF23, BUB3, MAD2L1, STAG2, ANLN, NUF2, DLG1, HGF, KIF2C, KIF11, CDCA3, CHEK1, SMC1A, HELLS, CDK6, SPAG5, BUB1, CCNB2, CCND1,	479	318	15360	4.84027	1.46206e-15	3.65515e-16	5.32337e-16
GOTERM_BP_ALL	GO:0000279~M phase	45	0.0806	9.72053e-19	CDC25A, TIMELESS, TERF1, CDC2, GTSE1, CEP55, ZWINT, TTK, PBK, CENPF, FBXO5, TPX2, KNTC1, ASPM, CENPE, SPC25, RPA1, NEK2, RAD21, NUSAP1, NEK1, KIF15, NDC80, NCAPG, NBN, SMC4, CCNB1, BUB1B, KIF23, BUB3, MAD2L1, STAG2, ANLN, NUF2, DLG1, HGF, KIF2C, KIF11, CDCA3, CHEK1, SMC1A, HELLS, SPAG5, BUB1, CCNB2,	479	287	15360	5.0279	5.10717e-15	1.02143e-15	1.85952e-15
GOTERM_BP_ALL	GO:0022403~cell cycle phase	49	0.0878	5.2677e-18	CDC25A, GTSE1, ZWINT, PBK, DBF4, FBXO5, CENPF, ASPM, KNTC1, SPC25, RAD21, NEK2, NCAPG, NBN, CCNB1, KIF23, STAG2, ANLN, NUF2, HGF, CDCA3, CHEK1, CDK6, HELLS, CCNB2, TIMELESS, TERF1, CDC2, CEP55, TTK, TPX2, SKP2, CENPE, RPA1, NUSAP1, NDC80, KIF15, NEK1, SMC4, BUB1B, BUB3, MAD2L1, DLG1, KIF2C, KIF11, SMC1A, SPAG5, CCND1, BUB1,	479	356	15360	4.41369	2.76765e-14	4.61275e-15	1.0077e-14
GOTERM_BP_ALL	GO:0051301~cell division	39	0.0699	1.64597e-16	CDC25A, TIMELESS, TERF1, CDC2, CEP55, ZWINT, CENPF, FBXO5, KNTC1, ASPM, CENPE, SPC25, NEK2, RAD21, TOP1, NUSAP1, NEK1, NDC80, NCAPG, SMC4, CCNB1, BUB1B, KIF23, MAD2L1, STAG2, ANLN, NUF2, KIF11, CDCA3, SGOL2, SMC1A, HELLS, CDK6, CCNE2, SPAG5, BUB1, CCNB2, CCND1, PARD3,	479	245	15360	5.10451	5.83311e-13	8.33777e-14	2.10942e-13
GOTERM_BP_ALL	GO:0022402~cell cycle process	70	0.1254	3.37128e-16	CDC25A, DHCR24, GTSE1, ZWINT, KRAS, PBK, DBF4, FBXO5, CENPF, KNTC1, ASPM, SPC25, PLAGL1, NEK2, RAD21, RBBP8, NCAPG, NBN, CCNB1, KIF23, STAG2, ANLN, NUF2, HGF, CDCA3, CHEK1, CDK6, HELLS, C13orf15, CCNB2, TCF7L2, EXT1, TIMELESS, TERF1, FIGF, IGF2, CDC2, CEP55, IGF1R, RBL1, TTK, GAS2L3, PTN, TPX2, SKP2, CENPE, RPA1, NUSAP1, NEK1, GMNN, NDC80, KIF15, MYC, SMC4, BUB1B, BUB3, MAD2L1, PTCH1, DLG1, TBX3,…	479	749	15360	2.9969	1.74993e-12	2.18714e-13	6.32827e-13
GOTERM_BP_ALL	GO:0000074~regulation of progression through cell cycle	46	0.0824	7.63556e-10	CDC25A, TIMELESS, FIGF, DHCR24, IGF2, CDC2, GTSE1, ZWINT, KRAS, IGF1R, RBL1, TTK, GAS2L3, CENPF, FBXO5, PTN, SKP2, KNTC1, PLAGL1, NEK2, NUSAP1, RBBP8, GMNN, NBN, MYC, CCNB1, BUB1B, BUB3, MAD2L1, PTCH1, ANLN, DLG1, TBX3, CHEK1, PCNA, PPBP, SMC1A, CDK6, CCNE2, C13orf15, MKI67, BUB1, CCNB2, TCF7L2, CCND1, EXT1,	479	526	15360	2.80432	4.01172e-06	2.86552e-07	1.46067e-06
GOTERM_BP_ALL	GO:0051726~regulation of cell cycle	46	0.0824	9.13667e-10	CDC25A, TIMELESS, FIGF, DHCR24, IGF2, CDC2, GTSE1, ZWINT, KRAS, IGF1R, RBL1, TTK, GAS2L3, CENPF, FBXO5, PTN, SKP2, KNTC1, PLAGL1, NEK2, NUSAP1, RBBP8, GMNN, NBN, MYC, CCNB1, BUB1B, BUB3, MAD2L1, PTCH1, ANLN, DLG1, TBX3, CHEK1, PCNA, PPBP, SMC1A, CDK6, CCNE2, C13orf15, MKI67, BUB1, CCNB2, TCF7L2, CCND1, EXT1,	479	529	15360	2.78842	4.80039e-06	3.20027e-07	1.74783e-06
GOTERM_BP_ALL	GO:0006260~DNA replication	30	0.0538	1.07051e-09	TERF1, MCM8, TOP2A, BLM, NASP, RRM2, RFC4, FEN1, DBF4, MCM6, GINS1, RFC3, RNASEH2A, RPA1, TOP1, GMNN, RRM1, NBN, MCM4, PRIM2, PCNA, DTL, CCNE2, GINS2, RBBP4, NUP98, CCDC88A, MCM10, POLE2, NFIB,	479	250	15360	3.84802	5.62444e-06	3.51529e-07	2.04787e-06
GOTERM_BP_ALL	GO:0006261~DNA-dependent DNA replication	13	0.0233	0.000159299	MCM8, RFC4, MCM6, MCM4, PRIM2, PCNA, RFC3, RPA1, CCNE2, TOP1, CCDC88A, GMNN, NBN,	479	110	15360	3.78971	0.567003	0.0169371	0.304297
GOTERM_BP_ALL	GO:0032502~developmental process	169	0.3029	7.84688e-13	DCBLD2, SPIN1, HMGCR, GREM1, TNFRSF19, FGFR2, KRT18, SPP1, CLDN11, PLAGL1, RYBP, TOP1, SF3B1, TDGF1, DCT, FST, ADAMTS9, CEP290, AFP, TDGF3, MORF4L2, HOXC6, HGF, SPARC, MYBPC1, HOXD4, CDK6, BCL11A, BST2, CCDC88A, IGFBP3, THBD, HOXA7, EXT1, MPPED2, MCOLN3, TIMELESS, FIGF, NARG1, MGP, BLM, GATA6, HOXC9, NTN4, SON, NASP, ANGPT1, ENC1, NRIP1, MYH10, IGF2BP3, NDUFS1, SMAD5, PRKDC, HOXB9, LAMA1, ZIC1, H…	479	3262	15360	1.66134	4.12284e-09	4.58094e-10	1.50113e-09
GOTERM_BP_ALL	GO:0007275~multicellular organismal development	130	0.233	1.75822e-11	SPIN1, HMGCR, GREM1, SPP1, CLDN11, RYBP, TOP1, SF3B1, TDGF1, DCT, FST, ADAMTS9, CEP290, AFP, TDGF3, HOXC6, SPARC, MYBPC1, HOXD4, CDK6, BCL11A, BST2, IGFBP3, THBD, HOXA7, EXT1, MPPED2, MCOLN3, TIMELESS, FIGF, NARG1, MGP, BLM, GATA6, NTN4, HOXC9, NASP, ANGPT1, ENC1, NRIP1, SMAD5, PRKDC, HOXB9, LAMA1, ZIC1, HOXB8, DICER1, GPC3, HOXB7, ZNF22, DACH1, POSTN, DSP, JAG1, HOXA10, CRISPLD2, DHCR24, DCN, SR…	479	2349	15360	1.77466	9.23767e-08	9.23767e-09	3.36344e-08
GOTERM_BP_ALL	GO:0048513~organ development	81	0.1452	1.12572e-09	DHCR24, DCN, SRGN, HMGCR, COL6A3, KRAS, GREM1, CENPF, GJC1, RBP2, SPP1, TDGF1, DCT, FST, EPAS1, AHSG, LEF1, CEP290, AFP, PDLIM5, FGA, TDGF3, SPARC, HES5, CDK6, BCL11A, IGFBP3, PDPN, AXIN2, EXT1, TIMELESS, MCOLN3, NARG1, FIGF, MGP, IGF2, HOXA5, BLM, GATA6, FABP1, PITX2, BNC1, ANGPT1, IGF1R, HOXB3, EFNB2, NRIP1, PTN, RELN, SMARCC1, PKP2, SEMA6A, GMNN, KRT19, SMAD5, UTRN, PRKDC, COL3A1, ZIC1, MLL, C…	479	1282	15360	2.02606	5.9145e-06	3.47913e-07	2.15348e-06
GOTERM_BP_ALL	GO:0048856~anatomical structure development	116	0.2079	1.78441e-09	DCBLD2, HMGCR, GREM1, FGFR2, KRT18, CLDN11, SPP1, TDGF1, DCT, FST, AFP, CEP290, TDGF3, MORF4L2, SPARC, CDK6, BCL11A, CCDC88A, IGFBP3, EXT1, MPPED2, MCOLN3, TIMELESS, FIGF, NARG1, MGP, BLM, GATA6, NTN4, NASP, ANGPT1, ENC1, NRIP1, MYH10, IGF2BP3, SMAD5, PRKDC, ZIC1, DICER1, CASC5, GPC3, DLG1, SCML1, ZNF22, POSTN, DSP, JAG1, CRISPLD2, DHCR24, DCN, SRGN, COL6A3, KRAS, NES, GJC1, CENPF, SGMS1, RBP2, G…	479	2153	15360	1.72771	9.37525e-06	5.20849e-07	3.41355e-06
GOTERM_BP_ALL	GO:0048731~system development	94	0.1685	1.67905e-07	DHCR24, DCN, SRGN, HMGCR, COL6A3, KRAS, GREM1, NES, CENPF, GJC1, RBP2, SPP1, CLDN11, TDGF1, DCT, FST, EPAS1, AHSG, LEF1, CEP290, AFP, PDLIM5, FABP7, FGA, TDGF3, PPP1R9A, CREB1, SPARC, BCL11A, HES5, CDK6, RAB23, ZEB1, IGFBP3, MAP1B, PDPN, AXIN2, EXT1, MPPED2, TIMELESS, MCOLN3, NARG1, FIGF, MGP, IGF2, HOXA5, BLM, GATA6, NTN4, FABP1, PITX2, BNC1, ANGPT1, IGF1R, HOXB3, EFNB2, ENC1, NRIP1, PTN, RELN, …	479	1760	15360	1.71266	0.000881783	3.39291e-05	0.000321199
GOTERM_BP_ALL	GO:0009653~anatomical structure morphogenesis	67	0.1201	5.12891e-07	DCBLD2, DCN, KRAS, GREM1, GJC1, SGMS1, FGFR2, KRT18, TDGF1, FST, AHSG, EPAS1, LEF1, CEP290, FGA, TDGF3, MORF4L2, ERBB2IP, CREB1, SLC40A1, TMEM97, RAB23, CCDC88A, ZEB1, IGFBP3, MAP1B, EZR, PDPN, TIMELESS, FIGF, NARG1, GATA6, FABP1, PITX2, ANGPT1, IGF1R, EFNB2, RELN, MYH10, SMARCC1, IGF2BP3, SFRP1, SEMA6A, GMNN, COL3A1, ZIC1, COL15A1, PTCH1, ERAP1, DICER1, KITLG, CASC5, SERPINF1, GPC3, MCAM, HAND1,…	479	1133	15360	1.89627	0.0026911	8.98202e-05	0.000981148
GOTERM_BP_ALL	GO:0009887~organ morphogenesis	33	0.0591	2.32394e-06	FIGF, NARG1, GATA6, DCN, FABP1, PITX2, ANGPT1, IGF1R, KRAS, EFNB2, GREM1, GJC1, SMARCC1, SEMA6A, GMNN, FST, COL3A1, EPAS1, ZIC1, COL15A1, LEF1, PTCH1, CEP290, ERAP1, DICER1, KITLG, SERPINF1, GPC3, HAND1, TBX3, ZNF22, HEY2, JAG1,	479	415	15360	2.54989	0.0121358	0.00038149	0.00444557
GOTERM_BP_ALL	GO:0032501~multicellular organismal process	159	0.2849	1.08132e-05	SERPINA1, SPIN1, HMGCR, NAALAD2, GREM1, SPP1, CLDN11, RYBP, TOP1, FGB, SF3B1, TDGF1, PLAT, DCT, NBN, ATP7B, FST, CALD1, ADAMTS9, CEP290, AFP, TDGF3, APOA1, HOXC6, HGF, SPARC, MYBPC1, HOXD4, CDK6, BCL11A, BST2, IGFBP3, THBD, HOXA7, EXT1, MPPED2, MCOLN3, TIMELESS, NARG1, FIGF, MGP, BLM, GATA6, HOXC9, NTN4, NASP, PLSCR1, APOB, ANGPT1, ENC1, NRIP1, GNAS, SMAD5, PRKDC, HOXB9, LAMA1, ZIC1, HOXB8, DICER…	479	3759	15360	1.35638	0.055229	0.00157689	0.0206834
GOTERM_BP_ALL	GO:0007059~chromosome segregation	16	0.0287	6.18925e-10	BUB3, MAD2L1, TOP2A, STAG2, ZWINT, NUF2, CENPF, SGOL2, CENPE, SMC1A, NEK2, RAD21, NUSAP1, NDC80, NCAPG, SMC4,	479	63	15360	8.14395	3.25182e-06	2.50141e-07	1.18399e-06
GOTERM_BP_ALL	GO:0000070~mitotic sister chromatid segregation	10	0.0179	2.78105e-07	BUB3, MAD2L1, CENPE, SMC1A, NEK2, ZWINT, NUSAP1, NDC80, NCAPG, SMC4,	479	31	15360	10.3441	0.0014601	5.41157e-05	0.000532009
GOTERM_BP_ALL	GO:0000819~sister chromatid segregation	10	0.0179	3.76346e-07	BUB3, MAD2L1, CENPE, SMC1A, NEK2, ZWINT, NUSAP1, NDC80, NCAPG, SMC4,	479	32	15360	10.0209	0.00197537	7.06161e-05	0.000719941
GOTERM_BP_ALL	GO:0000075~cell cycle checkpoint	16	0.0287	4.85248e-10	BUB1B, BUB3, MAD2L1, GTSE1, CDC2, ZWINT, TTK, DLG1, CENPF, KNTC1, CHEK1, SMC1A, CCNE2, RBBP8, BUB1, NBN,	479	62	15360	8.2753	2.54949e-06	2.31772e-07	9.28271e-07
GOTERM_BP_ALL	GO:0007093~mitotic cell cycle checkpoint	12	0.0215	2.46343e-09	BUB1B, CENPF, BUB3, KNTC1, MAD2L1, CDC2, GTSE1, ZWINT, BUB1, TTK, DLG1, NBN,	479	33	15360	11.6607	1.29428e-05	6.81204e-07	4.71251e-06
GOTERM_BP_ALL	GO:0007088~regulation of mitosis	15	0.0269	2.5885e-08	BUB1B, BUB3, MAD2L1, GTSE1, CDC2, ZWINT, ANLN, DLG1, TTK, CENPF, KNTC1, NEK2, NUSAP1, BUB1, NBN,	479	70	15360	6.87146	0.00013599	5.91301e-06	4.95175e-05
GOTERM_BP_ALL	GO:0007094~mitotic cell cycle spindle assembly checkpoint	5	0.009	3.00868e-05	CENPF, BUB3, MAD2L1, BUB1, TTK,	479	7	15360	22.9049	0.146217	0.00404509	0.0575398
GOTERM_BP_ALL	GO:0031577~spindle checkpoint	5	0.009	5.86921e-05	CENPF, BUB3, MAD2L1, BUB1, TTK,	479	8	15360	20.0418	0.265362	0.00749318	0.112217
GOTERM_BP_ALL	GO:0065007~biological regulation	228	0.4086	5.78091e-10	MCM6, FGFR2, KRT18, ZNF83, CLDN11, PLAGL1, ZFP91, FGB, TDGF1, PLAT, NBN, RGS13, PRKD3, SLC9A3R1, MORF4L2, HOXC6, HGF, TGIF2, NSBP1, CHEK1, JMJD1C, CDK6, BCL11A, C13orf15, ZNF124, THBD, EXT1, TIMELESS, NARG1, MGP, PSIP1, TBC1D4, GATA6, SSR1, PLSCR1, ZMYM2, NRIP1, SERBP1, MYH10, IGF2BP3, IRX3, NDUFS1, SMAD5, HOXB9, LAMA1, ZIC1, DICER1, DLG1, F2RL1, HOXB7, ZNF22, ZBTB38, ZNF567, CCNE2, HOXA10, CCND1…	479	5238	15360	1.39581	3.03729e-06	2.53108e-07	1.10588e-06
GOTERM_BP_ALL	GO:0050789~regulation of biological process	209	0.3746	3.17035e-09	MCM6, KRT18, ZNF83, PLAGL1, ZFP91, FGB, TDGF1, NBN, RGS13, MORF4L2, HOXC6, TGIF2, NSBP1, CHEK1, JMJD1C, CDK6, BCL11A, C13orf15, ZNF124, EXT1, TIMELESS, NARG1, MGP, PSIP1, TBC1D4, GATA6, SSR1, ZMYM2, NRIP1, SERBP1, MYH10, IGF2BP3, IRX3, SMAD5, HOXB9, LAMA1, ZIC1, DICER1, DLG1, HOXB7, ZNF22, ZBTB38, ZNF567, CCNE2, HOXA10, CCND1, TCF4, CDC25A, TBL1XR1, DHCR24, TBC1D1, ZWINT, BCLAF1, KRAS, ZFP42, SER…	479	4759	15360	1.40827	1.66569e-05	8.3285e-07	6.06483e-06
GOTERM_BP_ALL	GO:0050794~regulation of cellular process	195	0.3495	1.32846e-08	MCM6, KRT18, ZNF83, PLAGL1, ZFP91, FGB, TDGF1, NBN, RGS13, MORF4L2, HOXC6, TGIF2, JMJD1C, CHEK1, NSBP1, CDK6, BCL11A, C13orf15, ZNF124, EXT1, TIMELESS, NARG1, PSIP1, TBC1D4, GATA6, SSR1, ZMYM2, NRIP1, SERBP1, IGF2BP3, IRX3, SMAD5, HOXB9, LAMA1, ZIC1, DICER1, DLG1, HOXB7, ZNF22, ZBTB38, ZNF567, CCNE2, HOXA10, CCND1, TCF4, CDC25A, TBL1XR1, DHCR24, TBC1D1, ZWINT, BCLAF1, KRAS, ZFP42, SERPINB9, FBXO5…	479	4422	15360	1.41407	6.97947e-05	3.32367e-06	2.54132e-05
GOTERM_BP_ALL	GO:0006139~nucleobase, nucleoside, nucleotide and nucleic acid metabolic process	158	0.2832	0.000828618	NCOA3, MCM6, KNTC1, ZNF83, ZFP91, PLAGL1, RYBP, FANCI, TOP1, SF3B1, NBN, FST, RBM25, UHRF1, ESCO2, THRAP3, MORF4L2, HOXC6, ATF7IP, TGIF2, NSBP1, CHEK1, JMJD1C, HOXD4, OLIG3, BCL11A, EPRS, DTL, KLF12, CCDC88A, ZNF124, E2F7, HOXA7, BRWD1, TIMELESS, NARG1, MLF1IP, BLM, PSIP1, GATA6, HOXC9, NASP, FEN1, USP1, ZMYM2, NRIP1, SERBP1, RPA1, IGF2BP3, EIF2C2, IRX3, NDUFS1, SMAD5, PRKDC, HOXB9, HOXB8, SMC5, …	479	4051	15360	1.25069	0.987162	0.0761341	1.57328
GOTERM_BP_ALL	GO:0043283~biopolymer metabolic process	200	0.3584	0.00113189	GALNT7, MCM6, FGFR2, ZNF83, PLAGL1, ZFP91, FANCI, TOP1, SF3B1, TDGF1, PLAT, NBN, NID2, PRKD3, ESCO2, MORF4L2, HOXC6, TGIF2, UBE2W, CDCA3, NSBP1, CHEK1, JMJD1C, CDK6, BCL11A, EPRS, DTL, ZNF124, TIMELESS, NARG1, MASTL, PSIP1, GATA6, USP1, ZMYM2, ENC1, NRIP1, SERBP1, RPA1, IGF2BP3, IRX3, SMAD5, PRKDC, HOXB9, DICER1, HOXB7, ZNF22, ZBTB38, ZNF567, CCNE2, GINS2, DSP, HOXA10, CCND1, TCF4, CDC25A, TBL1XR…	479	5361	15360	1.1963	0.997395	0.0944131	2.14322
GOTERM_BP_ALL	GO:0019222~regulation of metabolic process	118	0.2115	0.00302594	NCOA3, MCM6, KNTC1, ZNF83, ZFP91, PLAGL1, RYBP, TDGF1, NBN, FST, UHRF1, THRAP3, MORF4L2, HOXC6, ATF7IP, TGIF2, NSBP1, JMJD1C, OLIG3, HOXD4, BCL11A, KLF12, CCDC88A, IGFBP3, ZNF124, E2F7, HOXA7, TIMELESS, BRWD1, NARG1, MLF1IP, BLM, PSIP1, GATA6, HOXC9, ZMYM2, NRIP1, SERBP1, IGF2BP3, IRX3, SMAD5, HOXB9, HOXB8, DEK, REN, SCML1, HOXB7, ZNF22, DACH1, ZBTB38, ZNF567, RFX4, HOXA10, CCND1, TCF4, TBL1XR1, …	479	2975	15360	1.27189	1	0.200892	5.63251
GOTERM_BP_ALL	GO:0031323~regulation of cellular metabolic process	114	0.2043	0.00354264	NCOA3, MCM6, KNTC1, ZNF83, ZFP91, PLAGL1, RYBP, TDGF1, NBN, FST, UHRF1, THRAP3, MORF4L2, HOXC6, ATF7IP, TGIF2, NSBP1, JMJD1C, OLIG3, HOXD4, BCL11A, KLF12, CCDC88A, IGFBP3, ZNF124, E2F7, HOXA7, TIMELESS, BRWD1, NARG1, MLF1IP, BLM, PSIP1, GATA6, HOXC9, ZMYM2, NRIP1, SERBP1, IGF2BP3, IRX3, SMAD5, HOXB9, HOXB8, DEK, SCML1, HOXB7, ZNF22, DACH1, ZBTB38, ZNF567, RFX4, HOXA10, CCND1, TCF4, TBL1XR1, CDCA7…	479	2873	15360	1.2724	1	0.222735	6.56373
GOTERM_BP_ALL	GO:0019219~regulation of nucleobase, nucleoside, nucleotide and nucleic acid metabolic process	105	0.1882	0.0063994	NCOA3, MCM6, KNTC1, ZNF83, ZFP91, PLAGL1, RYBP, NBN, FST, UHRF1, THRAP3, MORF4L2, HOXC6, ATF7IP, TGIF2, NSBP1, JMJD1C, OLIG3, HOXD4, BCL11A, KLF12, CCDC88A, ZNF124, E2F7, HOXA7, TIMELESS, BRWD1, NARG1, MLF1IP, BLM, PSIP1, GATA6, HOXC9, ZMYM2, NRIP1, SERBP1, IRX3, SMAD5, HOXB9, HOXB8, DEK, SCML1, HOXB7, ZNF22, DACH1, ZBTB38, ZNF567, RFX4, HOXA10, TCF4, TBL1XR1, CDCA7, BCLAF1, ZFP42, CENPF, RBBP8, …	479	2658	15360	1.26675	1	0.298867	11.5571
GOTERM_BP_ALL	GO:0006355~regulation of transcription, DNA-dependent	96	0.172	0.00975642	TBL1XR1, CDCA7, BCLAF1, NCOA3, ZFP42, MCM6, KNTC1, ZNF83, PLAGL1, ZFP91, RYBP, WASL, RBBP8, ZNF207, SOX1, ZNF148, FST, EPAS1, ARID2, UHRF1, LEF1, PNRC2, THRAP3, E2F8, MORF4L2, CASZ1, CHD1, HOXC6, CREB1, ATF7IP, BCL11B, TGIF2, HOXA9, MCM4, JMJD1C, NSBP1, HOXD4, OLIG3, MITF, HELLS, BCL11A, HES5, KLF12, RBBP4, HOXB6, ZEB1, ZNF124, TSHZ1, TCF7L2, E2F7, HOXA7, NFIB, ZFPM2, BRWD1, TIMELESS, NARG1, MLF1…	479	2432	15360	1.26579	1	0.39354	17.1017
GOTERM_BP_ALL	GO:0006259~DNA metabolic process	59	0.1057	2.02429e-08	FANCD2, TBL1XR1, RRM2, DBF4, MCM6, GINS1, CBX5, RAD21, FANCI, TOP1, RBBP8, RRM1, NBN, SOX1, RAD51AP1, ARID2, UHRF1, ESCO2, MORF4L2, CHD1, ATF7IP, MCM4, PRIM2, CHEK1, JMJD1C, DTL, HELLS, RBBP4, NUP98, CCDC88A, TCF7L2, POLE2, NFIB, TERF1, MCM8, TOP2A, BLM, NASP, RFC4, FEN1, USP1, RBL1, SMARCC1, RFC3, RNASEH2A, RPA1, GMNN, PRKDC, SMC4, SMC5, MLL, RSF1, SOX6, PCNA, SMC1A, CCNE2, GINS2, MCM10, ATRX,	479	860	15360	2.19993	0.000106351	4.83437e-06	3.87244e-05
GOTERM_BP_ALL	GO:0006974~response to DNA damage stimulus	28	0.0502	3.4772e-06	FANCD2, TIMELESS, TOP2A, BLM, GTSE1, CDC2, RFC4, FEN1, USP1, RFC3, RPA1, RAD21, FANCI, RBBP8, NBN, PRKDC, RAD51AP1, RIF1, SMC5, MLL, UHRF1, ESCO2, CHEK1, PCNA, SMC1A, DTL, POLE2, ATRX,	479	324	15360	2.77121	0.0181034	0.000553461	0.00665163
GOTERM_BP_ALL	GO:0009719~response to endogenous stimulus	32	0.0573	3.49948e-06	FANCD2, TIMELESS, MGP, TOP2A, BLM, GTSE1, CDC2, RFC4, FEN1, USP1, APOA2, RFC3, RPA1, RAD21, FANCI, RBBP8, KRT19, NBN, PRKDC, RAD51AP1, RIF1, MLL, SMC5, UHRF1, ESCO2, REN, CHEK1, PCNA, SMC1A, DTL, POLE2, ATRX,	479	403	15360	2.54625	0.0182183	0.000540628	0.00669425
GOTERM_BP_ALL	GO:0006281~DNA repair	23	0.0412	3.32227e-05	FANCD2, MLL, SMC5, TOP2A, UHRF1, BLM, ESCO2, RFC4, USP1, FEN1, CHEK1, PCNA, RFC3, SMC1A, RPA1, FANCI, RAD21, RBBP8, NBN, POLE2, RAD51AP1, PRKDC, ATRX,	479	267	15360	2.76231	0.160169	0.00435437	0.0635354
GOTERM_BP_ALL	GO:0006950~response to stress	54	0.0968	0.000656823	FANCD2, DHCR24, DCBLD2, GTSE1, SERPINA1, RAD21, FANCI, RBBP8, FGB, PLAT, NBN, RAD51AP1, AHSG, APOA4, EPAS1, RIF1, UHRF1, HSP90AA1, ESCO2, FGA, HGF, CHEK1, FGG, DTL, HSP90AB1, THBD, POLE2, TIMELESS, TOP2A, BLM, CDC2, RFC4, PLSCR1, FEN1, USP1, HSPD1, RELN, RFC3, RPA1, IDH1, PRKDC, HSPH1, SMC5, MLL, FN1, F2RL1, ANXA8L2, HSP90B1, PCNA, BMPR1B, SMC1A, SEPP1, CCND1, ATRX,	479	1081	15360	1.60186	0.96832	0.061927	1.24904
GOTERM_BP_ALL	GO:0007389~pattern specification process	20	0.0358	4.30305e-07	FST, ZIC1, HOXB8, LEF1, PTCH1, HOXA5, PITX2, TBX3, GREM1, RELN, PCDH8, BMPR1B, SFRP1, RAB23, HOXB6, SF3B1, TDGF1, AXIN2, SMAD5, PRKDC,	479	157	15360	4.08494	0.00225827	7.79563e-05	0.000823163
GOTERM_BP_ALL	GO:0003002~regionalization	15	0.0269	8.77712e-06	HOXB8, LEF1, PTCH1, TBX3, GREM1, RELN, PCDH8, BMPR1B, SFRP1, RAB23, HOXB6, SF3B1, TDGF1, AXIN2, PRKDC,	479	111	15360	4.33335	0.0450681	0.00131671	0.0167892
GOTERM_BP_ALL	GO:0009790~embryonic development	25	0.0448	2.25517e-05	NASP, HMGCR, GREM1, GINS1, SFRP1, TOP1, TDGF1, SMAD5, PRKDC, LAMA1, ZIC1, MLL, PTCH1, LEF1, DICER1, CEP290, TDGF3, HAND1, TBX3, PCDH8, RAB23, ZEB1, HOXB6, THBD, AXIN2,	479	299	15360	2.68117	0.111737	0.00311325	0.0431322
GOTERM_BP_ALL	GO:0035282~segmentation	8	0.0143	0.000103157	PCDH8, LEF1, SFRP1, HOXB6, TDGF1, AXIN2, TBX3, PRKDC,	479	36	15360	7.12596	0.418424	0.0117138	0.197153
GOTERM_BP_ALL	GO:0009952~anterior/posterior pattern formation	10	0.0179	0.000274021	PCDH8, HOXB8, LEF1, SFRP1, HOXB6, SF3B1, TDGF1, AXIN2, TBX3, PRKDC,	479	69	15360	4.64736	0.763049	0.0273106	0.522898
GOTERM_BP_ALL	GO:0001756~somitogenesis	5	0.009	0.00600077	PCDH8, LEF1, SFRP1, AXIN2, PRKDC,	479	24	15360	6.68058	1	0.288253	10.8758
GOTERM_BP_ALL	GO:0007051~spindle organization and biogenesis	8	0.0143	1.47515e-06	BUB1B, KIF23, KIF11, SMC1A, ZWINT, SPAG5, NDC80, TTK,	479	20	15360	12.8267	0.00772049	0.000249983	0.0028219
GOTERM_BP_ALL	GO:0000226~microtubule cytoskeleton organization and biogenesis	11	0.0197	0.00024661	BUB1B, KIF2C, KIF23, KIF11, SMC1A, ZWINT, NUSAP1, SPAG5, NDC80, MAP1B, TTK,	479	83	15360	4.24982	0.726335	0.0250887	0.470709
GOTERM_BP_ALL	GO:0007017~microtubule-based process	18	0.0323	0.000538661	BUB1B, KIF23, GTSE1, KIF20A, ZWINT, KIF18A, KTN1, TTK, KIF2C, KIF11, CENPE, SMC1A, NUSAP1, KIF14, KIF15, NDC80, SPAG5, MAP1B,	479	220	15360	2.62365	0.94104	0.0520116	1.02543
GOTERM_BP_ALL	GO:0007010~cytoskeleton organization and biogenesis	31	0.0556	0.00106755	GTSE1, KIF20A, ZWINT, KRAS, TTK, CENPE, NUSAP1, WIPF1, KIF14, CDC42BPA, WASL, SEMA6A, NDC80, KIF15, KRT19, BUB1B, KIF23, ANLN, KIF18A, PPP1R9A, KTN1, ERBB2IP, DLG1, KIF2C, KIF11, SMC1A, WASF2, CCDC88A, SPAG5, MAP1B, EZR,	479	526	15360	1.88987	0.996346	0.0922236	2.02257
GOTERM_BP_ALL	GO:0051325~interphase	10	0.0179	0.00344789	CENPF, TIMELESS, SKP2, CHEK1, CDC2, GTSE1, CDK6, CCND1, DBF4, CCNB1,	479	98	15360	3.27212	1	0.220095	6.39362
GOTERM_BP_ALL	GO:0051329~interphase of mitotic cell cycle	9	0.0161	0.00787622	CENPF, SKP2, CHEK1, CDC2, GTSE1, CDK6, CCND1, DBF4, CCNB1,	479	92	15360	3.13697	1	0.342724	14.0382
GOTERM_BP_ALL	GO:0007155~cell adhesion	39	0.0699	0.00378545	MGP, DCBLD2, DSC3, COL6A3, COL14A1, JUB, RELN, PODXL, SPP1, CLDN11, PKP2, NPNT, HAPLN1, FLRT2, NID2, LAMA1, COL15A1, PKP4, KITLG, PVRL3, ERBB2IP, MCAM, COL5A1, DLG1, FN1, SPON1, PGM5, PCDH8, MYBPC1, COL21A1, BMPR1B, ARHGAP5, DSC2, DSG2, HES5, CDK6, CDH1, POSTN, FREM2,	479	774	15360	1.61577	1	0.225446	6.9983
GOTERM_BP_ALL	GO:0022610~biological adhesion	39	0.0699	0.00378545	MGP, DCBLD2, DSC3, COL6A3, COL14A1, JUB, RELN, PODXL, SPP1, CLDN11, PKP2, NPNT, HAPLN1, FLRT2, NID2, LAMA1, COL15A1, PKP4, KITLG, PVRL3, ERBB2IP, MCAM, COL5A1, DLG1, FN1, SPON1, PGM5, PCDH8, MYBPC1, COL21A1, BMPR1B, ARHGAP5, DSC2, DSG2, HES5, CDK6, CDH1, POSTN, FREM2,	479	774	15360	1.61577	1	0.225446	6.9983
GOTERM_BP_ALL	GO:0006139~nucleobase, nucleoside, nucleotide and nucleic acid metabolic process	158	0.2832	0.000828618	NCOA3, MCM6, KNTC1, ZNF83, ZFP91, PLAGL1, RYBP, FANCI, TOP1, SF3B1, NBN, FST, RBM25, UHRF1, ESCO2, THRAP3, MORF4L2, HOXC6, ATF7IP, TGIF2, NSBP1, CHEK1, JMJD1C, HOXD4, OLIG3, BCL11A, EPRS, DTL, KLF12, CCDC88A, ZNF124, E2F7, HOXA7, BRWD1, TIMELESS, NARG1, MLF1IP, BLM, PSIP1, GATA6, HOXC9, NASP, FEN1, USP1, ZMYM2, NRIP1, SERBP1, RPA1, IGF2BP3, EIF2C2, IRX3, NDUFS1, SMAD5, PRKDC, HOXB9, HOXB8, SMC5, …	479	4051	15360	1.25069	0.987162	0.0761341	1.57328
GOTERM_BP_ALL	GO:0043283~biopolymer metabolic process	200	0.3584	0.00113189	GALNT7, MCM6, FGFR2, ZNF83, PLAGL1, ZFP91, FANCI, TOP1, SF3B1, TDGF1, PLAT, NBN, NID2, PRKD3, ESCO2, MORF4L2, HOXC6, TGIF2, UBE2W, CDCA3, NSBP1, CHEK1, JMJD1C, CDK6, BCL11A, EPRS, DTL, ZNF124, TIMELESS, NARG1, MASTL, PSIP1, GATA6, USP1, ZMYM2, ENC1, NRIP1, SERBP1, RPA1, IGF2BP3, IRX3, SMAD5, PRKDC, HOXB9, DICER1, HOXB7, ZNF22, ZBTB38, ZNF567, CCNE2, GINS2, DSP, HOXA10, CCND1, TCF4, CDC25A, TBL1XR…	479	5361	15360	1.1963	0.997395	0.0944131	2.14322
GOTERM_BP_ALL	GO:0044238~primary metabolic process	290	0.5197	0.00215939	SLC7A7, GALNT7, CTSC, MCM6, FGFR2, ZNF83, PLAGL1, ZFP91, FANCI, TOP1, FGB, SF3B1, TDGF1, PLAT, NBN, DCT, CYP51A1, NID2, ADAMTS9, PRKD3, ESCO2, SLC9A3R1, MORF4L2, HOXC6, SC4MOL, HGF, TGIF2, UBE2W, CDCA3, NSBP1, CHEK1, JMJD1C, CDK6, BCL11A, EPRS, DTL, ZNF124, EXT1, TIMELESS, NARG1, MASTL, PSIP1, GATA6, USP1, ZMYM2, ENC1, NRIP1, SEC63, SERBP1, CENPE, RPA1, IGF2BP3, EIF2C2, IRX3, FLRT2, NDUFS1, AGPAT…	479	8291	15360	1.12162	0.999988	0.162609	4.051
GOTERM_BP_ALL	GO:0044237~cellular metabolic process	289	0.5179	0.00237706	SLC7A7, GALNT7, CTSC, MCM6, FGFR2, ZNF83, PLAGL1, ZFP91, FANCI, TOP1, FGB, SF3B1, TDGF1, PLAT, NBN, DCT, CYP51A1, NID2, ADAMTS9, PRKD3, ESCO2, MORF4L2, HOXC6, SC4MOL, HGF, TGIF2, UBE2W, CDCA3, NSBP1, CHEK1, JMJD1C, CDK6, BCL11A, EPRS, DTL, ZNF124, EXT1, TIMELESS, NARG1, MASTL, PSIP1, GATA6, USP1, ZMYM2, ENC1, NRIP1, SEC63, SERBP1, CENPE, RPA1, IGF2BP3, EIF2C2, IRX3, FLRT2, NDUFS1, AGPAT5, SMAD5, …	479	8269	15360	1.12073	0.999996	0.172589	4.45062
GOTERM_BP_ALL	GO:0043170~macromolecule metabolic process	256	0.4588	0.00267902	SLC7A7, GALNT7, CTSC, MCM6, FGFR2, ZNF83, PLAGL1, ZFP91, FANCI, TOP1, FGB, SF3B1, TDGF1, PLAT, NBN, NID2, ADAMTS9, PRKD3, ESCO2, SLC9A3R1, MORF4L2, HOXC6, HGF, TGIF2, UBE2W, CDCA3, NSBP1, CHEK1, JMJD1C, CDK6, BCL11A, EPRS, DTL, ZNF124, EXT1, TIMELESS, NARG1, MASTL, PSIP1, GATA6, USP1, ZMYM2, ENC1, NRIP1, SEC63, SERBP1, CENPE, RPA1, IGF2BP3, EIF2C2, IRX3, SMAD5, PRKDC, HOXB9, HSPH1, DICER1, NKTR, …	479	7216	15360	1.13763	0.999999	0.182373	5.00234
GOTERM_BP_ALL	GO:0007017~microtubule-based process	18	0.0323	0.000538661	BUB1B, KIF23, GTSE1, KIF20A, ZWINT, KIF18A, KTN1, TTK, KIF2C, KIF11, CENPE, SMC1A, NUSAP1, KIF14, KIF15, NDC80, SPAG5, MAP1B,	479	220	15360	2.62365	0.94104	0.0520116	1.02543
GOTERM_BP_ALL	GO:0016126~sterol biosynthetic process	8	0.0143	7.01532e-05	SQLE, DHCR24, HMGCS1, FDFT1, HMGCR, SC4MOL, CYP51A1, SC5DL,	479	34	15360	7.54513	0.308297	0.00834224	0.134117
GOTERM_BP_ALL	GO:0016125~sterol metabolic process	12	0.0215	7.83423e-05	SQLE, INSIG1, DHCR24, HMGCS1, FDFT1, APOA1, APOB, HMGCR, SOAT1, SC4MOL, CYP51A1, SC5DL,	479	87	15360	4.42301	0.337428	0.00910554	0.149761
GOTERM_BP_ALL	GO:0008203~cholesterol metabolic process	9	0.0161	0.00245084	INSIG1, DHCR24, HMGCS1, FDFT1, APOA1, APOB, HMGCR, SOAT1, CYP51A1,	479	76	15360	3.79738	0.999997	0.172707	4.5857
GOTERM_BP_ALL	GO:0006694~steroid biosynthetic process	9	0.0161	0.00457014	SQLE, DHCR24, HMGCS1, BMPR1B, FDFT1, HMGCR, SC4MOL, CYP51A1, SC5DL,	479	84	15360	3.43573	1	0.244098	8.38969
GOTERM_BP_ALL	GO:0008202~steroid metabolic process	14	0.0251	0.00577769	SQLE, DHCR24, AFP, APOA1, APOB, SOAT1, HMGCR, SC4MOL, INSIG1, HMGCS1, FDFT1, BMPR1B, CYP51A1, SC5DL,	479	187	15360	2.40072	1	0.281733	10.4924
GOTERM_BP_ALL	GO:0006695~cholesterol biosynthetic process	5	0.009	0.00803966	DHCR24, HMGCS1, FDFT1, HMGCR, CYP51A1,	479	26	15360	6.16669	1	0.345649	14.3087
GOTERM_BP_ALL	GO:0048519~negative regulation of biological process	62	0.1111	5.90513e-05	DHCR24, DCBLD2, SRGN, BCLAF1, KRAS, SERPINB9, CENPF, SGMS1, KRT18, PODXL, SPP1, PLAGL1, RYBP, TDGF1, NBN, FST, ZNF148, AHSG, LEF1, RGS13, FABP7, ATF7IP, RGS5, CHEK1, CDK6, HES5, HELLS, RBBP4, RAB23, KLF12, ZEB1, IGFBP3, MAP1B, AXIN2, ZFPM2, EXT1, TIMELESS, BLM, CDC2, SON, TIA1, IGF1R, RBL1, NRIP1, GAS2L3, APOA2, SFRP1, GMNN, MYC, BUB1B, PTCH1, DICER1, RSF1, GPC3, HAND1, DLG1, TBX3, HSP90B1, FRZB,…	479	1181	15360	1.68344	0.266747	0.00736004	0.112904
GOTERM_BP_ALL	GO:0048523~negative regulation of cellular process	60	0.1075	6.12443e-05	DHCR24, DCBLD2, BCLAF1, KRAS, SERPINB9, CENPF, SGMS1, KRT18, PODXL, PLAGL1, RYBP, TDGF1, NBN, FST, ZNF148, AHSG, LEF1, RGS13, FABP7, ATF7IP, RGS5, CHEK1, CDK6, HES5, HELLS, RBBP4, RAB23, KLF12, ZEB1, IGFBP3, MAP1B, AXIN2, ZFPM2, EXT1, TIMELESS, BLM, CDC2, SON, TIA1, IGF1R, RBL1, NRIP1, GAS2L3, APOA2, SFRP1, GMNN, MYC, BUB1B, PTCH1, DICER1, RSF1, GPC3, HAND1, DLG1, TBX3, HSP90B1, FRZB, TRIM33, JAG…	479	1132	15360	1.69965	0.275148	0.0074555	0.117094
GOTERM_BP_ALL	GO:0006357~regulation of transcription from RNA polymerase II promoter	29	0.052	0.000967154	BRWD1, GATA6, ZNF367, RBL1, NRIP1, SMARCC1, PLAGL1, RYBP, RBBP8, SMAD5, MYC, FST, ZNF148, EPAS1, LEF1, UHRF1, THRAP3, CHD1, DEK, HOXC6, HAND1, ATF7IP, TBX3, ZBTB38, KLF12, ZEB1, TCF7L2, ZFPM2, TCF4,	479	476	15360	1.95365	0.993804	0.0853291	1.83402
GOTERM_BP_ALL	GO:0031324~negative regulation of cellular metabolic process	25	0.0448	0.00108902	TIMELESS, BLM, BCLAF1, TIA1, RBL1, NRIP1, CENPF, APOA2, RYBP, GMNN, FST, ZNF148, LEF1, RSF1, HAND1, ATF7IP, TBX3, TRIM33, HELLS, RAB23, KLF12, ZEB1, IGFBP3, ZFPM2, TCF4,	479	387	15360	2.0715	0.996736	0.0924719	2.06284
GOTERM_BP_ALL	GO:0009892~negative regulation of metabolic process	26	0.0466	0.00253017	TIMELESS, BLM, BCLAF1, TIA1, RBL1, NRIP1, CENPF, APOA2, RYBP, GMNN, FST, ZNF148, LEF1, RSF1, HAND1, ATF7IP, TBX3, TRIM33, HELLS, RAB23, KLF12, ZEB1, IGFBP3, MAP1B, ZFPM2, TCF4,	479	436	15360	1.91224	0.999998	0.175439	4.73076
GOTERM_BP_ALL	GO:0045934~negative regulation of nucleobase, nucleoside, nucleotide and nucleic acid metabolic process	21	0.0376	0.00335398	TIMELESS, ZNF148, FST, LEF1, BLM, BCLAF1, RSF1, RBL1, ATF7IP, HAND1, TBX3, NRIP1, CENPF, TRIM33, HELLS, KLF12, RYBP, ZEB1, GMNN, ZFPM2, TCF4,	479	328	15360	2.05306	1	0.21742	6.22473
GOTERM_BP_ALL	GO:0016481~negative regulation of transcription	19	0.0341	0.00611292	TIMELESS, ZNF148, FST, LEF1, BCLAF1, RSF1, RBL1, ATF7IP, HAND1, TBX3, NRIP1, CENPF, TRIM33, HELLS, KLF12, RYBP, ZEB1, ZFPM2, TCF4,	479	300	15360	2.0309	1	0.290164	11.068
GOTERM_BP_ALL	GO:0045892~negative regulation of transcription, DNA-dependent	15	0.0269	0.00752562	ZNF148, FST, LEF1, RSF1, RBL1, HAND1, ATF7IP, TBX3, NRIP1, HELLS, RYBP, KLF12, ZEB1, ZFPM2, TCF4,	479	215	15360	2.23722	1	0.333017	13.4552
GOTERM_BP_ALL	GO:0006461~protein complex assembly	21	0.0376	0.000961559	MLL, SLC9A3R1, ANLN, KPNA3, SLC7A7, IGF1R, TJP1, GJC1, CENPF, KNTC1, PRND, CENPE, XPO7, EPRS, AASS, NUP98, KPNB1, WIPF1, TNPO1, WASL, PARD3,	479	295	15360	2.28272	0.993619	0.0863048	1.8235
GOTERM_BP_ALL	GO:0048518~positive regulation of biological process	58	0.1039	0.000113011	BCLAF1, NCOA3, KRAS, TNFRSF19, PLAGL1, FGB, TDGF1, SLC20A1, FST, AHSG, EPAS1, IL6ST, LEF1, HSP90AA1, FGA, THRAP3, ATF7IP, CDK6, FGG, BST2, HSP90AB1, IGFBP3, PDPN, ZFPM2, FIGF, NARG1, TOP2A, BLM, GATA6, SSR1, BNC1, TIA1, IGF1R, TTK, EBF1, NRIP1, PTN, APOA2, SMARCC1, NUSAP1, SMAD5, MYC, LAMA1, KITLG, RSF1, SERPINF1, LIFR, GPC3, HAND1, DLG1, TBX3, STK4, ECT2, BMPR1B, ZBTB38, JAG1, CCND1, TCF4,	479	1106	15360	1.68162	0.447772	0.0125544	0.215967
GOTERM_BP_ALL	GO:0048522~positive regulation of cellular process	53	0.095	0.000166626	BCLAF1, NCOA3, KRAS, TNFRSF19, PLAGL1, FGB, TDGF1, SLC20A1, AHSG, EPAS1, IL6ST, LEF1, FGA, THRAP3, ATF7IP, CDK6, FGG, BST2, IGFBP3, PDPN, ZFPM2, FIGF, NARG1, TOP2A, BLM, GATA6, SSR1, BNC1, TIA1, IGF1R, TTK, NRIP1, EBF1, PTN, APOA2, SMARCC1, NUSAP1, SMAD5, MYC, LAMA1, KITLG, RSF1, LIFR, GPC3, HAND1, TBX3, STK4, ECT2, BMPR1B, ZBTB38, JAG1, CCND1, TCF4,	479	996	15360	1.70637	0.583356	0.0173581	0.318271
GOTERM_BP_ALL	GO:0006357~regulation of transcription from RNA polymerase II promoter	29	0.052	0.000967154	BRWD1, GATA6, ZNF367, RBL1, NRIP1, SMARCC1, PLAGL1, RYBP, RBBP8, SMAD5, MYC, FST, ZNF148, EPAS1, LEF1, UHRF1, THRAP3, CHD1, DEK, HOXC6, HAND1, ATF7IP, TBX3, ZBTB38, KLF12, ZEB1, TCF7L2, ZFPM2, TCF4,	479	476	15360	1.95365	0.993804	0.0853291	1.83402
GOTERM_BP_ALL	GO:0035107~appendage morphogenesis	7	0.0125	0.00396054	PTCH1, LEF1, BMPR1B, DICER1, RAB23, TBX3, GREM1,	479	49	15360	4.58097	1	0.222137	7.3105
GOTERM_BP_ALL	GO:0035108~limb morphogenesis	7	0.0125	0.00396054	PTCH1, LEF1, BMPR1B, DICER1, RAB23, TBX3, GREM1,	479	49	15360	4.58097	1	0.222137	7.3105
GOTERM_BP_ALL	GO:0048736~appendage development	7	0.0125	0.00396054	PTCH1, LEF1, BMPR1B, DICER1, RAB23, TBX3, GREM1,	479	49	15360	4.58097	1	0.222137	7.3105
GOTERM_BP_ALL	GO:0060173~limb development	7	0.0125	0.00396054	PTCH1, LEF1, BMPR1B, DICER1, RAB23, TBX3, GREM1,	479	49	15360	4.58097	1	0.222137	7.3105
GOTERM_BP_ALL	GO:0048646~anatomical structure formation	14	0.0251	0.00400923	NARG1, FIGF, EPAS1, COL15A1, LEF1, ERAP1, DICER1, CEP290, CASC5, TDGF3, SERPINF1, ANGPT1, HAND1, JAG1,	479	179	15360	2.50802	1	0.222189	7.39713
GOTERM_BP_ALL	GO:0035282~segmentation	8	0.0143	0.000103157	PCDH8, LEF1, SFRP1, HOXB6, TDGF1, AXIN2, TBX3, PRKDC,	479	36	15360	7.12596	0.418424	0.0117138	0.197153
GOTERM_BP_ALL	GO:0009888~tissue development	22	0.0394	0.00222056	FST, AHSG, MGP, DHCR24, LEF1, FGA, SRGN, TDGF3, BNC1, HAND1, TBX3, PTN, SPARC, SOX6, RBP2, BMPR1B, SPP1, CDK6, DSP, POSTN, DCT, AXIN2,	479	339	15360	2.08103	0.999992	0.16447	4.16346
GOTERM_BP_ALL	GO:0030282~bone mineralization	5	0.009	0.00512465	PTN, AHSG, MGP, SPP1, SRGN,	479	23	15360	6.97104	1	0.264167	9.36102
GOTERM_BP_ALL	GO:0001501~skeletal development	16	0.0287	0.00528477	AHSG, MGP, IGF2, HOXA5, SRGN, TBX3, PTN, SPARC, SOX6, FRZB, BMPR1B, SPP1, CDK6, POSTN, AXIN2, EXT1,	479	228	15360	2.2503	1	0.268609	9.63968
GOTERM_BP_ALL	GO:0007596~blood coagulation	10	0.0179	0.00369111	ANXA8L2, FGG, SERPINA1, FGA, PLSCR1, FGB, THBD, PLAT, HGF, F2RL1,	479	99	15360	3.23907	1	0.223007	6.82968
GOTERM_BP_ALL	GO:0050817~coagulation	10	0.0179	0.00421777	ANXA8L2, FGG, SERPINA1, FGA, PLSCR1, FGB, THBD, PLAT, HGF, F2RL1,	479	101	15360	3.17493	1	0.229919	7.76734
GOTERM_BP_ALL	GO:0007599~hemostasis	10	0.0179	0.00511569	ANXA8L2, FGG, SERPINA1, FGA, PLSCR1, FGB, THBD, PLAT, HGF, F2RL1,	479	104	15360	3.08335	1	0.266358	9.3454
GOTERM_BP_ALL	GO:0042060~wound healing	11	0.0197	0.00704727	ANXA8L2, DCBLD2, FGG, SERPINA1, FGA, PLSCR1, FGB, THBD, PLAT, HGF, F2RL1,	479	129	15360	2.73438	1	0.320947	12.6538
GOTERM_BP_ALL	GO:0030154~cell differentiation	78	0.1398	0.00367683	DHCR24, SRGN, BCLAF1, KRAS, UNC5B, TNFRSF19, SERPINB9, FBXO5, GJC1, SGMS1, KRT18, PLAGL1, RYBP, RAD21, TOP1, TDGF1, FST, EPAS1, LEF1, CEP290, TDGF3, PPP1R9A, CREB1, HGF, MYBPC1, MITF, HES5, CDK6, IGFBP3, MAP1B, AXIN2, MCOLN3, NARG1, FIGF, MGP, TOP2A, BLM, CDC2, NTN4, SON, TIA1, ANGPT1, IGF1R, EFNB2, HSPD1, RELN, SFRP1, NPNT, SEMA6A, KRT19, NDUFS1, SMAD5, PRKDC, BUB1B, ZIC1, COL15A1, BAG2, ERAP1, …	479	1835	15360	1.36306	1	0.224815	6.80414
GOTERM_BP_ALL	GO:0048869~cellular developmental process	78	0.1398	0.00367683	DHCR24, SRGN, BCLAF1, KRAS, UNC5B, TNFRSF19, SERPINB9, FBXO5, GJC1, SGMS1, KRT18, PLAGL1, RYBP, RAD21, TOP1, TDGF1, FST, EPAS1, LEF1, CEP290, TDGF3, PPP1R9A, CREB1, HGF, MYBPC1, MITF, HES5, CDK6, IGFBP3, MAP1B, AXIN2, MCOLN3, NARG1, FIGF, MGP, TOP2A, BLM, CDC2, NTN4, SON, TIA1, ANGPT1, IGF1R, EFNB2, HSPD1, RELN, SFRP1, NPNT, SEMA6A, KRT19, NDUFS1, SMAD5, PRKDC, BUB1B, ZIC1, COL15A1, BAG2, ERAP1, …	479	1835	15360	1.36306	1	0.224815	6.80414
GOTERM_BP_ALL	GO:0008203~cholesterol metabolic process	9	0.0161	0.00245084	INSIG1, DHCR24, HMGCS1, FDFT1, APOA1, APOB, HMGCR, SOAT1, CYP51A1,	479	76	15360	3.79738	0.999997	0.172707	4.5857
GOTERM_CC_ALL	GO:0005694~chromosome	42	0.0753	3.4533e-12	FANCD2, CENPN, TIMELESS, TERF1, MLF1IP, OIP5, TOP2A, BLM, ZWINT, RFC4, CENPF, SMARCC1, CENPE, CBX5, RFC3, SPC25, RPA1, NEK2, RAD21, FANCI, TOP1, NDC80, NBN, SMC4, BUB1B, BUB3, RIF1, SMC5, MAD2L1, CHD1, NUF2, PRPF4B, KIF2C, PRIM2, SGOL2, NSBP1, CHEK1, PCNA, SMC1A, HELLS, BUB1, ATRX,	487	385	15857	3.55206	2.99751e-09	1.49875e-09	5.3577e-09
GOTERM_CC_ALL	GO:0000775~chromosome, pericentric region	17	0.0305	5.00396e-10	BUB1B, CENPN, BUB3, MLF1IP, MAD2L1, ZWINT, NUF2, CENPF, KIF2C, SGOL2, CENPE, CBX5, SMC1A, SPC25, HELLS, NDC80, BUB1,	487	73	15857	7.5826	4.34344e-07	6.20492e-08	7.7634e-07
GOTERM_CC_ALL	GO:0044427~chromosomal part	34	0.0609	1.77994e-09	TIMELESS, CENPN, TERF1, MLF1IP, OIP5, BLM, ZWINT, RFC4, CENPF, SMARCC1, CENPE, CBX5, RFC3, SPC25, RPA1, NDC80, NBN, SMC4, BUB1B, BUB3, RIF1, MAD2L1, CHD1, NUF2, KIF2C, PRIM2, NSBP1, CHEK1, SGOL2, PCNA, SMC1A, HELLS, BUB1, ATRX,	487	326	15857	3.39589	1.54498e-06	1.93123e-07	2.76148e-06
GOTERM_CC_ALL	GO:0005634~nucleus	217	0.3889	7.3064e-13	SPIN1, MCM6, ASPM, ZNF83, PLAGL1, ZFP91, FANCI, TOP1, SF3B1, NBN, RIF1, RGS13, ESCO2, MORF4L2, HOXC6, TGIF2, NSBP1, CHEK1, JMJD1C, CDK6, BCL11A, DTL, C13orf15, ZNF124, TIMELESS, NARG1, PSIP1, GATA6, USP1, ZMYM2, ENC1, NRIP1, SERBP1, CENPE, RPA1, IGF2BP3, IRX3, NDC80, SMAD5, PRKDC, HOXB9, ZIC1, ARL4A, HOXB7, ZNF22, ZBTB38, ZNF567, CCNE2, GINS2, HOXA10, CCND1, TCF4, TBL1XR1, DHCR24, TBC1D1, ZWINT, …	487	4664	15857	1.51493	6.34194e-10	6.34194e-10	1.13355e-09
GOTERM_CC_ALL	GO:0043231~intracellular membrane-bound organelle	293	0.5251	2.54314e-11	SPIN1, RAB12, GALNT7, CTSC, MCM6, ASPM, ZNF83, PLAGL1, ZFP91, FANCI, TOP1, SF3B1, PLAT, NBN, DCT, RIF1, RGS13, ESCO2, MORF4L2, HOXC6, KTN1, SC4MOL, TGIF2, NSBP1, CHEK1, JMJD1C, SPAG9, CDK6, BCL11A, DTL, C13orf15, ZNF124, EXT1, TIMELESS, NARG1, MGP, PSIP1, GATA6, SSR1, USP1, ZMYM2, ENC1, NRIP1, SEC63, SERBP1, CENPE, RPA1, IGF2BP3, NDC80, IRX3, NDUFS1, AGPAT5, SMAD5, PRKDC, HOXB9, ZIC1, SEC14L1, DL…	487	7191	15857	1.32669	2.20744e-08	7.35813e-09	3.94555e-08
GOTERM_CC_ALL	GO:0043227~membrane-bound organelle	293	0.5251	2.69306e-11	SPIN1, RAB12, GALNT7, CTSC, MCM6, ASPM, ZNF83, PLAGL1, ZFP91, FANCI, TOP1, SF3B1, PLAT, NBN, DCT, RIF1, RGS13, ESCO2, MORF4L2, HOXC6, KTN1, SC4MOL, TGIF2, NSBP1, CHEK1, JMJD1C, SPAG9, CDK6, BCL11A, DTL, C13orf15, ZNF124, EXT1, TIMELESS, NARG1, MGP, PSIP1, GATA6, SSR1, USP1, ZMYM2, ENC1, NRIP1, SEC63, SERBP1, CENPE, RPA1, IGF2BP3, NDC80, IRX3, NDUFS1, AGPAT5, SMAD5, PRKDC, HOXB9, ZIC1, SEC14L1, DL…	487	7194	15857	1.32614	2.33757e-08	5.84393e-09	4.17815e-08
GOTERM_CC_ALL	GO:0043229~intracellular organelle	323	0.5789	1.59237e-10	SPIN1, RAB12, GALNT7, CTSC, MCM6, ASPM, KRT18, ZNF83, PLAGL1, ZFP91, FANCI, TOP1, SF3B1, PLAT, NBN, DCT, RIF1, RGS13, ESCO2, SLC9A3R1, MORF4L2, HOXC6, KTN1, SC4MOL, TGIF2, NSBP1, CHEK1, JMJD1C, SPAG9, CDK6, BCL11A, DTL, C13orf15, ZNF124, EXT1, TIMELESS, NARG1, MGP, PSIP1, GATA6, SSR1, USP1, ZMYM2, ENC1, NRIP1, SEC63, SERBP1, MYH10, CENPE, RPA1, IGF2BP3, NDC80, IRX3, KIF15, NDUFS1, AGPAT5, SMAD5, …	487	8288	15857	1.26895	1.38217e-07	2.76435e-08	2.47048e-07
GOTERM_CC_ALL	GO:0043226~organelle	323	0.5789	1.71127e-10	SPIN1, RAB12, GALNT7, CTSC, MCM6, ASPM, KRT18, ZNF83, PLAGL1, ZFP91, FANCI, TOP1, SF3B1, PLAT, NBN, DCT, RIF1, RGS13, ESCO2, SLC9A3R1, MORF4L2, HOXC6, KTN1, SC4MOL, TGIF2, NSBP1, CHEK1, JMJD1C, SPAG9, CDK6, BCL11A, DTL, C13orf15, ZNF124, EXT1, TIMELESS, NARG1, MGP, PSIP1, GATA6, SSR1, USP1, ZMYM2, ENC1, NRIP1, SEC63, SERBP1, MYH10, CENPE, RPA1, IGF2BP3, NDC80, IRX3, KIF15, NDUFS1, AGPAT5, SMAD5, …	487	8292	15857	1.26834	1.48538e-07	2.47564e-08	2.65495e-07
GOTERM_CC_ALL	GO:0044424~intracellular part	365	0.6541	2.35449e-09	SPIN1, RAB12, GALNT7, CTSC, MCM6, ASPM, KRT18, ZNF83, PLAGL1, ZFP91, FANCI, TOP1, SF3B1, PLAT, NBN, DCT, RIF1, RGS13, ESCO2, SLC9A3R1, MORF4L2, HOXC6, KTN1, SC4MOL, TGIF2, CDCA3, NSBP1, CHEK1, JMJD1C, SPAG9, CDK6, BCL11A, EPRS, DTL, C13orf15, ZNF124, EXT1, MCOLN3, TIMELESS, NARG1, MGP, GATA6, PSIP1, SSR1, USP1, ZMYM2, ENC1, NRIP1, SEC63, SERBP1, MYH10, CENPE, IGF2BP3, RPA1, EIF2C2, KIF15, NDC80, …	487	9906	15857	1.19974	2.0437e-06	2.27078e-07	3.65288e-06
GOTERM_CC_ALL	GO:0005622~intracellular	378	0.6774	3.83346e-08	SPIN1, RAB12, GALNT7, CTSC, MCM6, ASPM, DEPDC1B, KRT18, ZNF83, PLAGL1, ZFP91, FANCI, TOP1, SF3B1, PLAT, NBN, DCT, RIF1, RGS13, ESCO2, SLC9A3R1, MORF4L2, HOXC6, KTN1, SC4MOL, TGIF2, CDCA3, NSBP1, CHEK1, JMJD1C, SPAG9, DTL, EPRS, BCL11A, CDK6, C13orf15, ZNF124, EXT1, MCOLN3, TIMELESS, NARG1, MGP, GATA6, TBC1D4, PSIP1, SSR1, USP1, ZMYM2, ENC1, SEC63, NRIP1, SERBP1, MYH10, CENPE, IGF2BP3, RPA1, EIF2C…	487	10544	15857	1.16729	3.32738e-05	3.02494e-06	5.94742e-05
GOTERM_CC_ALL	GO:0000776~kinetochore	9	0.0161	4.04234e-06	BUB1B, CENPF, BUB3, MAD2L1, CBX5, CENPE, SMC1A, ZWINT, BUB1,	487	32	15857	9.15766	0.00350261	0.000219273	0.0062713
GOTERM_CC_ALL	GO:0000776~kinetochore	9	0.0161	4.04234e-06	BUB1B, CENPF, BUB3, MAD2L1, CBX5, CENPE, SMC1A, ZWINT, BUB1,	487	32	15857	9.15766	0.00350261	0.000219273	0.0062713
GOTERM_CC_ALL	GO:0044446~intracellular organelle part	154	0.276	6.46697e-07	CENPN, NUP160, SPIN1, RAB12, HMGCR, APPL1, GALNT7, KNTC1, SCAMP1, KRT18, HS3ST3B1, XPO7, NEK2, TOP1, KIF14, SF3B1, DCT, NBN, ATP7B, CCNB1, SC5DL, CALD1, RIF1, CEP290, SEL1L, THRAP3, ANLN, MORF4L2, GLUD2, KTN1, SC4MOL, SLC25A13, MYBPC1, NSBP1, CHEK1, C13orf15, E2F7, ITPR2, EXT1, TIMELESS, NARG1, MLF1IP, OIP5, BLM, SSR1, SON, ENC1, NRIP1, SEC63, JUB, MYH10, CENPE, GNAS, RPA1, NDC80, KIF15, NDUFS1, …	487	3498	15857	1.43348	0.000561175	4.31785e-05	0.00100331
GOTERM_CC_ALL	GO:0044422~organelle part	154	0.276	8.05426e-07	CENPN, NUP160, SPIN1, RAB12, HMGCR, APPL1, GALNT7, KNTC1, SCAMP1, KRT18, HS3ST3B1, XPO7, NEK2, TOP1, KIF14, SF3B1, DCT, NBN, ATP7B, CCNB1, SC5DL, CALD1, RIF1, CEP290, SEL1L, THRAP3, ANLN, MORF4L2, GLUD2, KTN1, SC4MOL, SLC25A13, MYBPC1, NSBP1, CHEK1, C13orf15, E2F7, ITPR2, EXT1, TIMELESS, NARG1, MLF1IP, OIP5, BLM, SSR1, SON, ENC1, NRIP1, SEC63, JUB, MYH10, CENPE, GNAS, RPA1, NDC80, KIF15, NDUFS1, …	487	3509	15857	1.42899	0.000698866	4.99352e-05	0.00124957
GOTERM_CC_ALL	GO:0015630~microtubule cytoskeleton	32	0.0573	3.02908e-06	TERF1, TOP2A, GTSE1, CDC2, KIF20A, SPIN1, TTK, JUB, TPX2, FBXO5, CENPF, MARCKS, KNTC1, CENPE, NEK2, NUSAP1, KIF14, KIF15, CCNB1, BUB1B, KIF23, MAD2L1, CEP290, KIF18A, CKAP2, KIF2C, KIF11, C13orf15, SPAG5, BUB1, CCNB2, MAP1B,	487	406	15857	2.56635	0.00262579	0.000175267	0.00469936
GOTERM_CC_ALL	GO:0043232~intracellular non-membrane-bound organelle	93	0.1667	1.52461e-05	FANCD2, CENPN, DSC3, GTSE1, SPIN1, ZWINT, NES, CENPF, FBXO5, KNTC1, KRT18, CBX5, SPC25, NEK2, RAD21, FANCI, TOP1, WASL, KIF14, NBN, CCNB1, KIF23, CALD1, RIF1, CEP290, LYAR, PDLIM5, PKP4, SLC9A3R1, ANLN, MORF4L2, CHD1, PPP1R9A, NUF2, MYBPC1, PRIM2, NSBP1, CHEK1, HELLS, C13orf15, CCNB2, MAP1B, EZR, TIMELESS, TERF1, MLF1IP, OIP5, TOP2A, TRPC4, BLM, CDC2, KIF20A, RFC4, TTK, FRMD4B, ENC1, JUB, MARCKS,…	487	1956	15857	1.54813	0.0131465	0.000661467	0.023651
GOTERM_CC_ALL	GO:0043228~non-membrane-bound organelle	93	0.1667	1.52461e-05	FANCD2, CENPN, DSC3, GTSE1, SPIN1, ZWINT, NES, CENPF, FBXO5, KNTC1, KRT18, CBX5, SPC25, NEK2, RAD21, FANCI, TOP1, WASL, KIF14, NBN, CCNB1, KIF23, CALD1, RIF1, CEP290, LYAR, PDLIM5, PKP4, SLC9A3R1, ANLN, MORF4L2, CHD1, PPP1R9A, NUF2, MYBPC1, PRIM2, NSBP1, CHEK1, HELLS, C13orf15, CCNB2, MAP1B, EZR, TIMELESS, TERF1, MLF1IP, OIP5, TOP2A, TRPC4, BLM, CDC2, KIF20A, RFC4, TTK, FRMD4B, ENC1, JUB, MARCKS,…	487	1956	15857	1.54813	0.0131465	0.000661467	0.023651
GOTERM_CC_ALL	GO:0044430~cytoskeletal part	42	0.0753	0.000101863	TERF1, TOP2A, CDC2, GTSE1, KIF20A, SPIN1, TTK, JUB, NES, MARCKS, CENPF, FBXO5, TPX2, KNTC1, MYH10, KRT18, CENPE, NEK2, NUSAP1, KIF14, KIF15, KRT19, CCNB1, BUB1B, KIF23, CALD1, MAD2L1, CEP290, ANLN, PPP1R9A, KIF18A, IQGAP1, KIF2C, CKAP2, KIF11, MYBPC1, DSP, C13orf15, SPAG5, BUB1, MAP1B, EZR,	487	720	15857	1.89937	0.0846252	0.00353062	0.157919
GOTERM_CC_ALL	GO:0005856~cytoskeleton	57	0.1022	0.000308584	DSC3, GTSE1, SPIN1, NES, FBXO5, CENPF, KNTC1, KRT18, NEK2, KIF14, WASL, CCNB1, KIF23, CALD1, CEP290, PDLIM5, PKP4, SLC9A3R1, ANLN, PPP1R9A, MYBPC1, C13orf15, MAP1B, CCNB2, EZR, TERF1, TRPC4, TOP2A, CDC2, KIF20A, TTK, FRMD4B, ENC1, JUB, TPX2, MARCKS, MYH10, CENPE, PKP2, NUSAP1, WIPF1, KIF15, KRT19, UTRN, BUB1B, ADD3, MAD2L1, KIF18A, IQGAP1, CKAP2, KIF2C, KIF11, DSC2, WASF2, DSP, SPAG5, BUB1,	487	1141	15857	1.6266	0.23501	0.00952197	0.477683
GOTERM_CC_ALL	GO:0044421~extracellular region part	53	0.095	5.02551e-07	RBP4, MATN2, SERPINA1, DCN, SRGN, COL14A1, COL6A3, GREM1, SPP1, HAPLN1, FGB, PLAT, NID2, AHSG, APOA4, ADAMTS9, ADAMTS18, AFP, LUM, FGA, APOA1, ERBB2IP, COL4A1, COL5A1, SPARC, FGG, THBD, FIGF, MGP, NTN4, PCSK5, DLK1, APOB, APOC3, PTN, RELN, SFRP1, NPNT, FLRT2, RHOBTB3, COL3A1, LAMA1, COL15A1, KITLG, REN, GPC3, FN1, SPON1, PROM1, PPBP, POSTN, SEPP1, FREM2,	487	819	15857	2.10709	0.000436119	3.63506e-05	0.000779681
GOTERM_CC_ALL	GO:0005578~proteinaceous extracellular matrix	28	0.0502	8.05726e-06	MGP, MATN2, NTN4, DCN, COL14A1, COL6A3, RELN, SPP1, NPNT, HAPLN1, FLRT2, RHOBTB3, NID2, COL3A1, LAMA1, ADAMTS9, ADAMTS18, COL15A1, LUM, ERBB2IP, GPC3, COL4A1, COL5A1, FN1, SPON1, SPARC, POSTN, FREM2,	487	344	15857	2.65028	0.00696933	0.000411311	0.0124997
GOTERM_CC_ALL	GO:0031012~extracellular matrix	28	0.0502	1.10193e-05	MGP, MATN2, NTN4, DCN, COL14A1, COL6A3, RELN, SPP1, NPNT, HAPLN1, FLRT2, RHOBTB3, NID2, COL3A1, LAMA1, ADAMTS9, ADAMTS18, COL15A1, LUM, ERBB2IP, GPC3, COL4A1, COL5A1, FN1, SPON1, SPARC, POSTN, FREM2,	487	350	15857	2.60485	0.00951923	0.000531238	0.0170946
GOTERM_CC_ALL	GO:0044420~extracellular matrix part	13	0.0233	0.000194814	LAMA1, COL3A1, COL15A1, NTN4, LUM, COL14A1, COL6A3, ERBB2IP, COL5A1, COL4A1, SPARC, RHOBTB3, NID2,	487	114	15857	3.71305	0.155588	0.00624393	0.301817
GOTERM_CC_ALL	GO:0005634~nucleus	217	0.3889	7.3064e-13	SPIN1, MCM6, ASPM, ZNF83, PLAGL1, ZFP91, FANCI, TOP1, SF3B1, NBN, RIF1, RGS13, ESCO2, MORF4L2, HOXC6, TGIF2, NSBP1, CHEK1, JMJD1C, CDK6, BCL11A, DTL, C13orf15, ZNF124, TIMELESS, NARG1, PSIP1, GATA6, USP1, ZMYM2, ENC1, NRIP1, SERBP1, CENPE, RPA1, IGF2BP3, IRX3, NDC80, SMAD5, PRKDC, HOXB9, ZIC1, ARL4A, HOXB7, ZNF22, ZBTB38, ZNF567, CCNE2, GINS2, HOXA10, CCND1, TCF4, TBL1XR1, DHCR24, TBC1D1, ZWINT, …	487	4664	15857	1.51493	6.34194e-10	6.34194e-10	1.13355e-09
GOTERM_CC_ALL	GO:0000776~kinetochore	9	0.0161	4.04234e-06	BUB1B, CENPF, BUB3, MAD2L1, CBX5, CENPE, SMC1A, ZWINT, BUB1,	487	32	15857	9.15766	0.00350261	0.000219273	0.0062713
GOTERM_CC_ALL	GO:0000793~condensed chromosome	9	0.0161	0.000366475	BUB1B, FANCD2, CENPF, CHEK1, CENPE, SMC1A, RPA1, NEK2, SMC4,	487	58	15857	5.0525	0.272513	0.010911	0.567058
GOTERM_CC_ALL	GO:0044421~extracellular region part	53	0.095	5.02551e-07	RBP4, MATN2, SERPINA1, DCN, SRGN, COL14A1, COL6A3, GREM1, SPP1, HAPLN1, FGB, PLAT, NID2, AHSG, APOA4, ADAMTS9, ADAMTS18, AFP, LUM, FGA, APOA1, ERBB2IP, COL4A1, COL5A1, SPARC, FGG, THBD, FIGF, MGP, NTN4, PCSK5, DLK1, APOB, APOC3, PTN, RELN, SFRP1, NPNT, FLRT2, RHOBTB3, COL3A1, LAMA1, COL15A1, KITLG, REN, GPC3, FN1, SPON1, PROM1, PPBP, POSTN, SEPP1, FREM2,	487	819	15857	2.10709	0.000436119	3.63506e-05	0.000779681
GOTERM_CC_ALL	GO:0005576~extracellular region	67	0.1201	9.72881e-05	RBP4, MATN2, SERPINA1, DCN, SRGN, COL6A3, COL14A1, GREM1, SPP1, NXPH2, HAPLN1, FGB, PLAT, NID2, FST, SMPDL3A, AHSG, APOA4, ADAMTS9, ADAMTS18, AFP, LUM, FGA, APOA1, ERBB2IP, COL5A1, COL4A1, SPARC, FGG, IGFBP3, THBD, FIGF, MGP, IGF2, NTN4, PCSK5, DLK1, APOB, APOC3, PTN, RELN, APOA2, GNAS, SFRP1, NPNT, FLRT2, RHOBTB3, COL3A1, LAMA1, COL15A1, ERAP1, KITLG, SERPINF1, PLA2G2A, GPC3, REN, FN1, SPON1, PR…	487	1350	15857	1.61597	0.0809826	0.00351258	0.150831
GOTERM_CC_ALL	GO:0005615~extracellular space	29	0.052	0.00290919	FIGF, RBP4, MGP, SERPINA1, PCSK5, SRGN, DLK1, APOB, COL6A3, APOC3, GREM1, PTN, RELN, SPP1, SFRP1, FGB, PLAT, AHSG, APOA4, AFP, KITLG, FGA, APOA1, REN, PROM1, PPBP, FGG, SEPP1, THBD,	487	521	15857	1.81239	0.92025	0.0643828	4.41941
GOTERM_CC_ALL	GO:0044428~nuclear part	56	0.1004	8.68061e-05	NUP160, APPL1, CENPF, CBX5, XPO7, RAD21, NEK2, TOP1, TNPO1, SF3B1, NBN, MATR3, ZNF148, EPAS1, LEF1, LYAR, THRAP3, MORF4L2, E2F8, CREB1, PRIM2, TAF15, NSBP1, CHEK1, RBBP4, NUP98, E2F7, TIMELESS, NARG1, TOP2A, OIP5, SON, KPNA3, PITX2, SFRS12, RBL1, ENC1, NRIP1, HSPD1, SMARCC1, SYNCRIP, RPA1, KPNB1, SMAD5, BUB1B, PRPF40A, RSF1, PRPF4B, TPR, PCNA, SMC1A, MKI67, WDHD1, TCF4, SRRM2, ATRX,	487	1061	15857	1.71856	0.072582	0.00327077	0.134591
GOTERM_CC_ALL	GO:0005654~nucleoplasm	29	0.052	0.0014906	NARG1, TOP2A, OIP5, SON, PITX2, APPL1, RBL1, NRIP1, SMARCC1, RPA1, TOP1, SF3B1, SMAD5, ZNF148, EPAS1, PRPF40A, LEF1, THRAP3, RSF1, E2F8, CREB1, TAF15, NSBP1, RBBP4, NUP98, E2F7, WDHD1, SRRM2, TCF4,	487	497	15857	1.89991	0.726048	0.0384767	2.28774
GOTERM_CC_ALL	GO:0031981~nuclear lumen	35	0.0627	0.00262187	NARG1, OIP5, TOP2A, SON, PITX2, APPL1, RBL1, ENC1, NRIP1, CENPF, SMARCC1, RPA1, TOP1, SF3B1, SMAD5, MATR3, ZNF148, EPAS1, PRPF40A, LEF1, LYAR, THRAP3, RSF1, MORF4L2, E2F8, CREB1, TAF15, NSBP1, NUP98, RBBP4, MKI67, E2F7, WDHD1, SRRM2, TCF4,	487	667	15857	1.70858	0.89759	0.0613374	3.99121
GOTERM_CC_ALL	GO:0044451~nucleoplasm part	24	0.043	0.00667555	ZNF148, EPAS1, NARG1, PRPF40A, OIP5, LEF1, SON, THRAP3, PITX2, RSF1, E2F8, CREB1, APPL1, RBL1, NRIP1, SMARCC1, TAF15, RPA1, RBBP4, SF3B1, E2F7, SRRM2, TCF4, SMAD5,	487	428	15857	1.82583	0.997014	0.135276	9.86982
GOTERM_CC_ALL	GO:0005667~transcription factor complex	14	0.0251	0.00720279	NARG1, EPAS1, LEF1, PITX2, E2F8, CREB1, APPL1, RBL1, NRIP1, TAF15, RBBP4, E2F7, SMAD5, TCF4,	487	195	15857	2.33768	0.998117	0.141905	10.6092
GOTERM_CC_ALL	GO:0044420~extracellular matrix part	13	0.0233	0.000194814	LAMA1, COL3A1, COL15A1, NTN4, LUM, COL14A1, COL6A3, ERBB2IP, COL5A1, COL4A1, SPARC, RHOBTB3, NID2,	487	114	15857	3.71305	0.155588	0.00624393	0.301817
GOTERM_CC_ALL	GO:0005792~microsome	15	0.0269	0.00100942	SQLE, ELOVL2, SOAT1, HMGCR, APOB, SEC63, TMED2, HSP90B1, CYB5A, MGST1, SPCS3, SYNCRIP, DCT, ATP1A2, FMO1,	487	175	15857	2.79091	0.583813	0.0287979	1.55465
GOTERM_CC_ALL	GO:0042598~vesicular fraction	15	0.0269	0.00132398	SQLE, ELOVL2, SOAT1, HMGCR, APOB, SEC63, TMED2, HSP90B1, CYB5A, MGST1, SPCS3, SYNCRIP, DCT, ATP1A2, FMO1,	487	180	15857	2.71338	0.683354	0.0352986	2.03446
GOTERM_CC_ALL	GO:0044420~extracellular matrix part	13	0.0233	0.000194814	LAMA1, COL3A1, COL15A1, NTN4, LUM, COL14A1, COL6A3, ERBB2IP, COL5A1, COL4A1, SPARC, RHOBTB3, NID2,	487	114	15857	3.71305	0.155588	0.00624393	0.301817
GOTERM_CC_ALL	GO:0005581~collagen	7	0.0125	0.00165189	COL3A1, COL15A1, LUM, COL6A3, COL14A1, COL4A1, COL5A1,	487	42	15857	5.42676	0.761891	0.0401716	2.53233
GOTERM_CC_ALL	GO:0012505~endomembrane system	46	0.0824	0.00299005	TYRP1, NUP160, DHCR24, GLG1, SSR1, KPNA3, RAB12, HMGCR, KRAS, GALNT7, SEC63, CENPF, SCD, INSIG1, SGMS1, SCAMP1, CYB5A, CBX5, HS3ST3B1, SPCS3, XPO7, KPNB1, TNPO1, DCT, MATR3, SC5DL, SQLE, MAN1A1, ELOVL2, SEL1L, ELOVL6, BCAP29, SOAT1, SC4MOL, KTN1, DLG1, UBE2J1, TMED2, HSP90B1, TPR, PCNA, FDFT1, NUP98, ITPR2, EXT1, FMO1,	487	960	15857	1.56019	0.925671	0.0644751	4.5396
GOTERM_CC_ALL	GO:0005789~endoplasmic reticulum membrane	24	0.043	0.0080483	SQLE, ELOVL2, DHCR24, SEL1L, SSR1, ELOVL6, BCAP29, SOAT1, HMGCR, SC4MOL, KTN1, DLG1, SEC63, UBE2J1, SCD, INSIG1, HSP90B1, CYB5A, FDFT1, SPCS3, ITPR2, EXT1, FMO1, SC5DL,	487	435	15857	1.79645	0.999101	0.153804	11.783
GOTERM_CC_ALL	GO:0005911~intercellular junction	17	0.0305	2.24522e-05	DSC3, PKP4, PVRL3, DLG1, TJP1, GJC1, PGM5, TJP2, DSC2, DSG2, CLDN11, MPDZ, PKP2, MPP5, DSP, CDC42BPA, PARD3,	487	155	15857	3.57116	0.0193	0.000927604	0.0348278
GOTERM_CC_ALL	GO:0030054~cell junction	25	0.0448	0.00121697	LIMS1, DSC3, GABRB3, JUB, GJC1, TJP1, CLDN11, MPDZ, MPP5, PKP2, CDC42BPA, PSD3, UTRN, PKP4, PVRL3, PPP1R9A, ERBB2IP, DLG1, TJP2, PGM5, DSG2, DSC2, CDH1, DSP, PARD3,	487	396	15857	2.05559	0.652495	0.0335213	1.87149
GOTERM_MF_ALL	GO:0005201~extracellular matrix structural constituent	10	0.0179	0.0036155	COL3A1, LAMA1, MGP, COL15A1, MATN2, LUM, COL14A1, COL4A1, COL5A1, FN1,	487	107	16968	3.25625	0.99997	0.422268	6.28573
GOTERM_MF_ALL	GO:0003677~DNA binding	98	0.1756	0.000470111	MCM6, KNTC1, ZNF83, ZFP91, PLAGL1, RYBP, TOP1, NBN, UHRF1, HOXC6, TGIF2, NSBP1, OLIG3, HOXD4, KLF12, ZNF124, E2F7, HOXA7, BLM, PSIP1, GATA6, HOXC9, SON, FEN1, RPA1, IRX3, KIF15, SMAD5, PRKDC, HOXB9, ZIC1, HOXB8, DEK, SCML1, HOXB7, ZNF22, DACH1, ZBTB38, ZNF567, RFX4, HOXA10, TCF4, BCLAF1, ZFP42, C12orf48, ZNF207, SOX1, RAD51AP1, ZNF148, EPAS1, ARID2, LEF1, CASZ1, E2F8, CHD1, CREB1, MCM4, HOXA9, PR…	487	2450	16968	1.39368	0.741613	0.139607	0.839259
GOTERM_MF_ALL	GO:0003700~transcription factor activity	47	0.0842	0.00203667	HOXA5, GATA6, HOXC9, ZNF367, PITX2, BNC1, HOXB3, EBF1, KNTC1, ZNF83, IRX3, ZNF207, SMAD5, SOX1, MYC, HOXB9, EPAS1, ZIC1, HOXB8, MLL, UHRF1, LEF1, E2F8, HOXC6, CREB1, HAND1, TBX3, SCML1, TGIF2, HOXA9, SOX6, HOXB7, HOXD4, ZBTB38, KLF12, HEY2, HOXB6, ZEB1, HOXA10, TSHZ1, TCF7L2, AFF1, E2F7, HOXA7, TCF4, NFIB, ATRX,	487	1034	16968	1.58372	0.99717	0.323733	3.58818
GOTERM_MF_ALL	GO:0030528~transcription regulator activity	64	0.1147	0.00218938	BCLAF1, NCOA3, KNTC1, ZNF83, RYBP, ZNF207, SOX1, ZNF148, EPAS1, UHRF1, LEF1, CEP290, THRAP3, E2F8, HOXC6, CREB1, TGIF2, HOXA9, TAF15, NSBP1, HOXD4, OLIG3, MITF, HES5, KLF12, HOXB6, ZEB1, E2F7, TCF7L2, TSHZ1, HOXA7, NFIB, ZFPM2, BRWD1, HOXA5, GATA6, HOXC9, PITX2, ZNF367, BNC1, HOXB3, EBF1, NRIP1, SMARCC1, IRX3, SMAD5, MYC, HOXB9, ZIC1, HOXB8, MLL, RSF1, DEK, HAND1, TBX3, SCML1, HOXB7, SOX6, ZBTB38…	487	1534	16968	1.45364	0.998178	0.325812	3.85227
GOTERM_MF_ALL	GO:0003700~transcription factor activity	47	0.0842	0.00203667	HOXA5, GATA6, HOXC9, ZNF367, PITX2, BNC1, HOXB3, EBF1, KNTC1, ZNF83, IRX3, ZNF207, SMAD5, SOX1, MYC, HOXB9, EPAS1, ZIC1, HOXB8, MLL, UHRF1, LEF1, E2F8, HOXC6, CREB1, HAND1, TBX3, SCML1, TGIF2, HOXA9, SOX6, HOXB7, HOXD4, ZBTB38, KLF12, HEY2, HOXB6, ZEB1, HOXA10, TSHZ1, TCF7L2, AFF1, E2F7, HOXA7, TCF4, NFIB, ATRX,	487	1034	16968	1.58372	0.99717	0.323733	3.58818
GOTERM_MF_ALL	GO:0003777~microtubule motor activity	9	0.0161	0.00370708	KIF2C, KIF23, KIF11, CENPE, SMC1A, KIF20A, KIF14, KIF15, KIF18A,	487	88	16968	3.56338	0.999977	0.414002	6.43999
GOTERM_MF_ALL	GO:0005539~glycosaminoglycan binding	11	0.0197	0.000859437	PTN, TGFBR3, FGFR2, HMMR, PTCH1, HAPLN1, POSTN, APOB, COL5A1, LIPG, FN1,	487	105	16968	3.6501	0.915797	0.219213	1.52926
GOTERM_MF_ALL	GO:0030247~polysaccharide binding	11	0.0197	0.00114782	PTN, TGFBR3, FGFR2, HMMR, PTCH1, HAPLN1, POSTN, APOB, COL5A1, LIPG, FN1,	487	109	16968	3.51615	0.963312	0.25954	2.03743
GOTERM_MF_ALL	GO:0001871~pattern binding	11	0.0197	0.00236672	PTN, TGFBR3, FGFR2, HMMR, PTCH1, HAPLN1, POSTN, APOB, COL5A1, LIPG, FN1,	487	120	16968	3.19384	0.998908	0.315359	4.15809
GOTERM_MF_ALL	GO:0008201~heparin binding	8	0.0143	0.00967468	PTN, FGFR2, PTCH1, POSTN, APOB, COL5A1, LIPG, FN1,	487	83	16968	3.35825	1	0.688328	15.9912
GOTERM_MF_ALL	GO:0005201~extracellular matrix structural constituent	10	0.0179	0.0036155	COL3A1, LAMA1, MGP, COL15A1, MATN2, LUM, COL14A1, COL4A1, COL5A1, FN1,	487	107	16968	3.25625	0.99997	0.422268	6.28573
GOTERM_MF_ALL	GO:0042802~identical protein binding	21	0.0376	0.00704428	TIMELESS, TYRP1, TERF1, FIGF, MLL, TOP2A, HSP90AA1, KITLG, PVRL3, IGF1R, HAND1, MCM6, STK4, CENPF, APOA2, GNAS, CLDN11, CCDC88A, CDC42BPA, E2F7, RP6-213H19.1,	487	381	16968	1.92042	1	0.603382	11.9006
GOTERM_MF_ALL	GO:0042803~protein homodimerization activity	12	0.0215	0.00840001	STK4, CENPF, TIMELESS, TYRP1, FIGF, APOA2, MLL, TOP2A, HSP90AA1, CCDC88A, PVRL3, HAND1,	487	166	16968	2.51869	1	0.651994	14.0318
GOTERM_MF_ALL	GO:0005524~ATP binding	70	0.1254	0.000143274	ATAD2, PBK, MCM6, FGFR2, PLK4, NEK2, KIF14, CDC42BPA, RRM1, ATP7B, KIF23, PRKD3, HSP90AA1, ATP2B1, THRAP3, CHD1, GLUD2, MCM4, CHEK1, CDK6, EPRS, HELLS, ROR1, HSP90AB1, TRIO, MELK, ATP1A2, MCM8, TOP2A, BLM, MASTL, CDC2, KIF20A, RFC4, IGF1R, TTK, DDX17, G3BP1, TPX2, HSPD1, MYH10, CENPE, RFC3, NEK1, KIF15, PRKDC, SMC4, BUB1B, HSPH1, SMC5, MLL, VRK2, DICER1, WNK1, EPHA4, MTHFD1, KIF18A, PRPF4B, STK4,…	487	1548	16968	1.57554	0.337922	0.079165	0.256486
GOTERM_MF_ALL	GO:0032559~adenyl ribonucleotide binding	70	0.1254	0.000202281	ATAD2, PBK, MCM6, FGFR2, PLK4, NEK2, KIF14, CDC42BPA, RRM1, ATP7B, KIF23, PRKD3, HSP90AA1, ATP2B1, THRAP3, CHD1, GLUD2, MCM4, CHEK1, CDK6, EPRS, HELLS, ROR1, HSP90AB1, TRIO, MELK, ATP1A2, MCM8, TOP2A, BLM, MASTL, CDC2, KIF20A, RFC4, IGF1R, TTK, DDX17, G3BP1, TPX2, HSPD1, MYH10, CENPE, RFC3, NEK1, KIF15, PRKDC, SMC4, BUB1B, HSPH1, SMC5, MLL, VRK2, DICER1, WNK1, EPHA4, MTHFD1, KIF18A, PRPF4B, STK4,…	487	1567	16968	1.55643	0.441345	0.0924778	0.361938
GOTERM_MF_ALL	GO:0030554~adenyl nucleotide binding	72	0.129	0.000299861	DHCR24, ATAD2, PBK, MCM6, FGFR2, PLK4, NEK2, KIF14, CDC42BPA, RRM1, ATP7B, KIF23, PRKD3, HSP90AA1, ATP2B1, THRAP3, CHD1, GLUD2, MCM4, CHEK1, CDK6, EPRS, HELLS, ROR1, HSP90AB1, TRIO, MELK, ATP1A2, MCM8, TOP2A, BLM, MASTL, CDC2, KIF20A, RFC4, IGF1R, TTK, DDX17, G3BP1, TPX2, HSPD1, MYH10, CENPE, RFC3, NEK1, KIF15, SMC4, PRKDC, BUB1B, HSPH1, SMC5, MLL, VRK2, DICER1, WNK1, EPHA4, MTHFD1, KIF18A, PRPF4…	487	1647	16968	1.52314	0.57816	0.116005	0.536094
GOTERM_MF_ALL	GO:0000166~nucleotide binding	91	0.1631	0.00134364	DHCR24, ATAD2, RAB12, KRAS, PBK, MCM6, FGFR2, TNRC6B, PLK4, NEK2, CDC42BPA, KIF14, RRM1, ATP7B, MATR3, KIF23, RBM25, PRKD3, HSP90AA1, SFRS6, ATP2B1, THRAP3, CHD1, GLUD2, SFRS7, MCM4, TAF15, CHEK1, HELLS, CDK6, EPRS, ROR1, HSP90AB1, RAB23, TRIO, MELK, ATP1A2, RAP2A, MCM8, TOP2A, BLM, MASTL, CDC2, KIF20A, RFC4, TIA1, SFRS12, IGF1R, TTK, DDX17, G3BP1, HSPD1, TPX2, MYH10, CENPE, RFC3, GNAS, SYNCRIP, …	487	2314	16968	1.37019	0.979133	0.27564	2.38109
GOTERM_MF_ALL	GO:0032555~purine ribonucleotide binding	78	0.1398	0.00167126	ATAD2, RAB12, KRAS, PBK, MCM6, FGFR2, PLK4, NEK2, KIF14, CDC42BPA, RRM1, ATP7B, KIF23, PRKD3, HSP90AA1, ATP2B1, THRAP3, CHD1, GLUD2, MCM4, CHEK1, CDK6, EPRS, HELLS, ROR1, HSP90AB1, RAB23, TRIO, MELK, ATP1A2, RAP2A, MCM8, TOP2A, BLM, MASTL, CDC2, KIF20A, RFC4, IGF1R, TTK, DDX17, G3BP1, HSPD1, TPX2, MYH10, CENPE, RFC3, GNAS, NEK1, KIF15, PRKDC, SMC4, BUB1B, HSPH1, MLL, SMC5, ARL4C, VRK2, DICER1, WN…	487	1933	16968	1.40593	0.991884	0.309473	2.95349
GOTERM_MF_ALL	GO:0032553~ribonucleotide binding	78	0.1398	0.00167126	ATAD2, RAB12, KRAS, PBK, MCM6, FGFR2, PLK4, NEK2, KIF14, CDC42BPA, RRM1, ATP7B, KIF23, PRKD3, HSP90AA1, ATP2B1, THRAP3, CHD1, GLUD2, MCM4, CHEK1, CDK6, EPRS, HELLS, ROR1, HSP90AB1, RAB23, TRIO, MELK, ATP1A2, RAP2A, MCM8, TOP2A, BLM, MASTL, CDC2, KIF20A, RFC4, IGF1R, TTK, DDX17, G3BP1, HSPD1, TPX2, MYH10, CENPE, RFC3, GNAS, NEK1, KIF15, PRKDC, SMC4, BUB1B, HSPH1, MLL, SMC5, ARL4C, VRK2, DICER1, WN…	487	1933	16968	1.40593	0.991884	0.309473	2.95349
GOTERM_MF_ALL	GO:0017076~purine nucleotide binding	80	0.1434	0.00222592	DHCR24, ATAD2, RAB12, KRAS, PBK, MCM6, FGFR2, PLK4, NEK2, KIF14, CDC42BPA, RRM1, ATP7B, KIF23, PRKD3, HSP90AA1, ATP2B1, THRAP3, CHD1, GLUD2, MCM4, CHEK1, CDK6, EPRS, HELLS, ROR1, HSP90AB1, RAB23, TRIO, MELK, ATP1A2, RAP2A, MCM8, TOP2A, BLM, MASTL, CDC2, KIF20A, RFC4, IGF1R, TTK, DDX17, G3BP1, HSPD1, TPX2, MYH10, CENPE, RFC3, GNAS, NEK1, KIF15, SMC4, PRKDC, BUB1B, HSPH1, MLL, SMC5, ARL4C, VRK2, DI…	487	2016	16968	1.38261	0.99836	0.314259	3.91536
GOTERM_MF_ALL	GO:0008094~DNA-dependent ATPase activity	10	0.0179	2.3734e-05	MCM4, MCM8, TOP2A, BLM, RFC3, RBBP4, RFC4, CHD1, G3BP1, MCM6,	487	55	16968	6.33489	0.0660266	0.0169318	0.0425311
GOTERM_MF_ALL	GO:0005518~collagen binding	6	0.0108	0.000414395	SPARC, MATN2, LUM, COL14A1, FN1, NID2,	487	23	16968	9.08919	0.696653	0.138525	0.740142
GOTERM_MF_ALL	GO:0008094~DNA-dependent ATPase activity	10	0.0179	2.3734e-05	MCM4, MCM8, TOP2A, BLM, RFC3, RBBP4, RFC4, CHD1, G3BP1, MCM6,	487	55	16968	6.33489	0.0660266	0.0169318	0.0425311
GOTERM_MF_ALL	GO:0003678~DNA helicase activity	6	0.0108	0.00434527	MCM4, BLM, CHD1, ATRX, G3BP1, MCM6,	487	38	16968	5.50135	0.999996	0.449433	7.50837
INTERPRO	IPR001827:Homeobox protein, antennapedia type	8	0.0143	1.76014e-06	HOXB7, HOXB8, HOXA5, HOXD4, HOXB6, HOXC6, HOXA7, HOXB3,	463	24	17845	12.8474	0.0103642	0.0103642	0.00340908
INTERPRO	IPR001356:Homeobox	17	0.0305	0.000241496	HOXB9, HOXB8, HOXA5, HOXC9, PITX2, HOXC6, HOXB3, TGIF2, HOXA9, HOXB7, HOXD4, HOXB6, ZEB1, IRX3, HOXA10, TSHZ1, HOXA7,	463	223	17845	2.93819	0.760592	0.379065	0.466707
INTERPRO	IPR012287:Homeodomain-related	16	0.0287	0.00129706	HOXB9, TERF1, HOXB8, HOXA5, HOXC9, PITX2, HOXC6, HOXB3, TGIF2, HOXA9, HOXB7, HOXD4, HOXB6, IRX3, HOXA10, HOXA7,	463	236	17845	2.61302	0.999539	0.853477	2.48252
INTERPRO	IPR001752:Kinesin, motor region	8	0.0143	0.000107127	KIF2C, KIF23, KIF11, CENPE, KIF20A, KIF14, KIF15, KIF18A,	463	43	17845	7.17063	0.469597	0.271713	0.207286
INTERPRO	IPR008161:Collagen helix repeat	7	0.0125	0.00346464	COL3A1, COL21A1, COL15A1, COL6A3, COL14A1, COL4A1, COL5A1,	463	57	17845	4.73324	1	0.871815	6.5012
INTERPRO	IPR000719:Protein kinase, core	26	0.0466	0.00290518	MASTL, CDC2, IGF1R, PBK, TTK, FGFR2, NEK2, PLK4, CDC42BPA, NEK1, BUB1B, VRK2, PRKD3, EPHA4, WNK1, PRPF4B, STK4, CHEK1, BMPR1B, CDK6, ROR1, TRIO, BUB1, RP6-213H19.1, MELK, NTRK2,	463	529	17845	1.89432	1	0.914575	5.47929
INTERPRO	IPR008271:Serine/threonine protein kinase, active site	20	0.0358	0.00313516	BUB1B, VRK2, MASTL, PRKD3, CDC2, WNK1, TTK, PBK, PRPF4B, STK4, CHEK1, BMPR1B, CDK6, NEK2, CDC42BPA, NEK1, TRIO, BUB1, MELK, RP6-213H19.1,	463	364	17845	2.1177	1	0.902047	5.90065
INTERPRO	IPR001478:PDZ/DHR/GLGF	12	0.0215	0.00238209	TJP1, TJP2, PDLIM5, SLC9A3R1, MPDZ, MPP5, SIPA1L2, PPP1R9A, ERBB2IP, PARD3, DLG1, RHPN2,	463	155	17845	2.98391	0.999999	0.94059	4.51421
INTERPRO	IPR001092:Basic helix-loop-helix dimerisation region bHLH	10	0.0179	0.00284672	EPAS1, OLIG3, MITF, HES5, HEY2, NCOA3, HAND1, TCF4, MYC, EBF1,	463	114	17845	3.38089	1	0.939933	5.37189
KEGG_PATHWAY	hsa04115:p53 signaling pathway	10	0.0179	0.000941851	CHEK1, CDC2, GTSE1, CDK6, CCNE2, RRM2, IGFBP3, CCNB2, CCND1, CCNB1,	161	68	4214	3.8491	0.172546	0.0371718	1.17508
KEGG_PATHWAY	hsa00100:Biosynthesis of steroids	7	0.0125	0.0002079	SQLE, DHCR24, FDFT1, HMGCR, SC4MOL, CYP51A1, SC5DL,	161	24	4214	7.63406	0.0409311	0.0206794	0.260482
KEGG_PATHWAY	hsa01430:Cell Communication	15	0.0269	0.000553959	COL3A1, LAMA1, DSC3, COL6A3, COL5A1, COL4A1, FN1, NES, GJC1, RELN, KRT18, DSC2, DSG2, SPP1, KRT19,	161	136	4214	2.88683	0.105398	0.0274601	0.69268
KEGG_PATHWAY	hsa04115:p53 signaling pathway	10	0.0179	0.000941851	CHEK1, CDC2, GTSE1, CDK6, CCNE2, RRM2, IGFBP3, CCNB2, CCND1, CCNB1,	161	68	4214	3.8491	0.172546	0.0371718	1.17508
KEGG_PATHWAY	hsa05216:Thyroid cancer	7	0.0125	0.000415925	TPR, LEF1, CDH1, TCF7L2, KRAS, CCND1, MYC,	161	27	4214	6.78583	0.0802178	0.0274879	0.520494
SMART	SM00389:HOX	17	0.0305	0.00150569	HOXB9, HOXB8, HOXA5, HOXC9, PITX2, HOXC6, HOXB3, TGIF2, HOXA9, HOXB7, HOXD4, HOXB6, ZEB1, IRX3, HOXA10, TSHZ1, HOXA7,	307	223	9899	2.45809	0.59934	0.367023	2.20434
SMART	SM00129:KISc	8	0.0143	0.000311642	KIF2C, KIF23, KIF11, CENPE, KIF20A, KIF14, KIF15, KIF18A,	307	43	9899	5.99894	0.172376	0.172376	0.460012
SMART	SM00228:PDZ	12	0.0215	0.00859565	TJP1, TJP2, PDLIM5, SLC9A3R1, MPDZ, MPP5, SIPA1L2, PPP1R9A, ERBB2IP, PARD3, DLG1, RHPN2,	307	155	9899	2.49633	0.9947	0.825653	11.9885
SMART	SM00353:HLH	10	0.0179	0.00869341	EPAS1, OLIG3, MITF, HES5, HEY2, NCOA3, HAND1, TCF4, MYC, EBF1,	307	114	9899	2.82845	0.995008	0.734195	12.1168
SP_PIR_KEYWORDS	cell cycle	56	0.1004	3.67719e-22	FANCD2, CDC25A, SPIN1, ZWINT, APPL1, MCM6, FBXO5, CENPF, ASPM, KNTC1, KRT18, SPC25, NEK2, RAD21, NCAPG, NBN, CCNB1, KIF23, RIF1, UHRF1, STAG2, ESCO2, NUF2, CDCA3, CHEK1, CDK6, HELLS, RBBP4, CCNB2, EXT1, TIMELESS, TERF1, MCM8, CDC2, CEP55, NASP, RBL1, CENPE, NIPBL, NUSAP1, NEK1, GMNN, NDC80, SMC4, BUB1B, MAD2L1, PTCH1, KIF11, SGOL2, SMC1A, CCNE2, SPAG5, MKI67, CCND1, PARD3, BUB1,	498	412	17599	4.80341	3.91989e-19	1.95994e-19	5.85718e-19
SP_PIR_KEYWORDS	mitosis	32	0.0573	1.33606e-20	CDC25A, TIMELESS, TERF1, CDC2, CEP55, ZWINT, FBXO5, CENPF, ASPM, KNTC1, CENPE, SPC25, NEK2, RAD21, NUSAP1, NEK1, NDC80, NCAPG, CCNB1, SMC4, BUB1B, KIF23, MAD2L1, STAG2, NUF2, KIF11, CDCA3, SMC1A, HELLS, SPAG5, BUB1, CCNB2,	498	128	17599	8.83484	1.42424e-17	4.74746e-18	2.12813e-17
SP_PIR_KEYWORDS	cell division	37	0.0663	3.87947e-19	CDC25A, TIMELESS, TERF1, CDC2, CEP55, ZWINT, FBXO5, CENPF, KNTC1, ASPM, CENPE, SPC25, NEK2, RAD21, NUSAP1, NEK1, NDC80, NCAPG, SMC4, CCNB1, BUB1B, KIF23, MAD2L1, STAG2, NUF2, KIF11, CDCA3, SGOL2, SMC1A, HELLS, CDK6, CCNE2, SPAG5, BUB1, CCNB2, CCND1, PARD3,	498	200	17599	6.53778	4.13552e-16	1.03388e-16	6.17938e-16
SP_PIR_KEYWORDS	nucleus	183	0.328	5.17112e-16	CENPN, NUP160, LUZP1, SPIN1, NCOA3, APPL1, MCM6, KNTC1, ASPM, ZNF83, XPO7, ZFP91, PLAGL1, RYBP, NEK2, SF3B1, NCAPG, NBN, CCNB1, ZC3HAV1, RIF1, UHRF1, STAG2, ESCO2, THRAP3, MORF4L2, HOXC6, ATF7IP, TGIF2, CHEK1, NSBP1, HOXD4, OLIG3, BCL11A, KLF12, ZNF124, HOXA7, BRWD1, TIMELESS, NARG1, MLF1IP, BLM, GATA6, PSIP1, HOXC9, SON, NASP, USP1, FEN1, ZMYM2, ENC1, NRIP1, SERBP1, NIPBL, IGF2BP3, RPA1, NDC80, …	498	3710	17599	1.74315	5.91749e-13	1.1835e-13	8.88178e-13
SP_PIR_KEYWORDS	dna replication	20	0.0358	7.85834e-13	MCM8, BLM, RRM2, NASP, RFC4, MCM6, MCM4, PRIM2, PCNA, GINS1, RFC3, RPA1, GINS2, RBBP4, TOP1, CCDC88A, RRM1, MCM10, POLE2, NFIB,	498	81	17599	8.72577	8.3768e-10	1.39613e-10	1.25168e-09
SP_PIR_KEYWORDS	extracellular matrix	20	0.0358	1.63618e-05	COL3A1, LAMA1, ADAMTS9, ADAMTS18, COL15A1, LUM, NTN4, DCN, COL6A3, COL14A1, COL5A1, COL4A1, FN1, SPON1, SPARC, RELN, HAPLN1, POSTN, FREM2, NID2,	498	220	17599	3.21267	0.0172906	0.000968522	0.0260586
SP_PIR_KEYWORDS	nucleus	183	0.328	5.17112e-16	CENPN, NUP160, LUZP1, SPIN1, NCOA3, APPL1, MCM6, KNTC1, ASPM, ZNF83, XPO7, ZFP91, PLAGL1, RYBP, NEK2, SF3B1, NCAPG, NBN, CCNB1, ZC3HAV1, RIF1, UHRF1, STAG2, ESCO2, THRAP3, MORF4L2, HOXC6, ATF7IP, TGIF2, CHEK1, NSBP1, HOXD4, OLIG3, BCL11A, KLF12, ZNF124, HOXA7, BRWD1, TIMELESS, NARG1, MLF1IP, BLM, GATA6, PSIP1, HOXC9, SON, NASP, USP1, FEN1, ZMYM2, ENC1, NRIP1, SERBP1, NIPBL, IGF2BP3, RPA1, NDC80, …	498	3710	17599	1.74315	5.91749e-13	1.1835e-13	8.88178e-13
SP_PIR_KEYWORDS	dna-binding	83	0.1487	2.7622e-06	BCLAF1, ZFP42, MCM6, ZNF83, PLAGL1, ZFP91, RYBP, TOP1, C12orf48, ZNF207, SOX1, RAD51AP1, ZNF148, EPAS1, ARID2, UHRF1, LEF1, CASZ1, CHD1, HOXC6, CREB1, TGIF2, HOXA9, MCM4, TAF15, PRIM2, NSBP1, HOXD4, OLIG3, MITF, HES5, KLF12, HOXB6, ZEB1, ZNF124, TSHZ1, TCF7L2, HOXA7, POLE2, NFIB, ZFPM2, TERF1, MCM8, TOP2A, HOXA5, BLM, PSIP1, GATA6, HOXC9, C14orf106, SON, ZNF367, PITX2, BNC1, HOXB3, EBF1, G3BP1, R…	498	1748	17599	1.67801	0.00294018	0.000184015	0.00439966
SP_PIR_KEYWORDS	Transcription regulation	80	0.1434	1.89059e-05	TBL1XR1, CDCA7, BCLAF1, NCOA3, ZFP42, MCM6, ZNF83, PLAGL1, ZFP91, RYBP, WASL, ZNF148, EPAS1, ARID2, UHRF1, LEF1, PNRC2, THRAP3, CASZ1, MORF4L2, HOXC6, CREB1, ATF7IP, BCL11B, TGIF2, HOXA9, MCM4, NSBP1, HOXD4, OLIG3, MITF, HELLS, HES5, BCL11A, KLF12, RBBP4, HOXB6, ZEB1, ZNF124, TSHZ1, TCF7L2, HOXA7, NFIB, ZFPM2, BRWD1, TIMELESS, NARG1, MLF1IP, MCM8, HOXA5, PSIP1, GATA6, HOXC9, ZNF367, BNC1, RBL1, Z…	498	1754	17599	1.61183	0.0199522	0.00106017	0.0301099
SP_PIR_KEYWORDS	Transcription	81	0.1452	1.91279e-05	TBL1XR1, CDCA7, BCLAF1, NCOA3, ZFP42, MCM6, ZNF83, PLAGL1, ZFP91, RYBP, WASL, ZNF148, EPAS1, ARID2, UHRF1, LEF1, PNRC2, THRAP3, CASZ1, MORF4L2, HOXC6, CREB1, ATF7IP, BCL11B, TGIF2, HOXA9, MCM4, PRIM2, NSBP1, HOXD4, OLIG3, MITF, HELLS, HES5, BCL11A, KLF12, RBBP4, HOXB6, ZEB1, ZNF124, TSHZ1, TCF7L2, HOXA7, NFIB, ZFPM2, BRWD1, TIMELESS, NARG1, MLF1IP, MCM8, HOXA5, PSIP1, GATA6, HOXC9, ZNF367, BNC1, …	498	1783	17599	1.60543	0.0201841	0.00101901	0.0304633
SP_PIR_KEYWORDS	DNA damage	13	0.0233	0.00128504	TIMELESS, FANCD2, RIF1, SMC5, UHRF1, USP1, CHEK1, SMC1A, RAD21, NBN, PRKDC, ATRX, RAD51AP1,	498	152	17599	3.02245	0.746079	0.0354291	2.02735
SP_PIR_KEYWORDS	DNA repair	11	0.0197	0.00896416	FANCD2, SMC5, CHEK1, UHRF1, SMC1A, RAD21, USP1, NBN, RAD51AP1, ATRX, PRKDC,	498	147	17599	2.64444	0.999932	0.168558	13.3617
SP_PIR_KEYWORDS	Homeobox	17	0.0305	0.000949599	HOXB9, HOXB8, HOXA5, HOXC9, PITX2, HOXC6, HOXB3, TGIF2, HOXA9, HOXB7, HOXD4, HOXB6, ZEB1, IRX3, HOXA10, TSHZ1, HOXA7,	498	232	17599	2.58952	0.636782	0.0302233	1.50188
SP_PIR_KEYWORDS	plasma	17	0.0305	6.61987e-09	RBP4, AHSG, APOA4, AFP, SERPINA1, FGA, APOA1, APOB, REN, APOC3, FN1, APOA2, FGG, APOC1, SEPP1, FGB, PLAT,	498	93	17599	6.45988	7.05676e-06	8.82098e-07	1.05444e-05
SP_PIR_KEYWORDS	cell cycle control	8	0.0143	6.7773e-05	CDC25A, SKP2, MCM4, CDC2, CDK6, MKI67, CCND1, CCNB1,	498	37	17599	7.64094	0.0697003	0.00313631	0.107897
SP_PIR_KEYWORDS	Secreted	67	0.1201	5.94364e-05	RBP4, SERPINA1, DCN, SRGN, COL6A3, COL14A1, GREM1, FGFR2, SPP1, NXPH2, HAPLN1, FGB, PLAT, NID2, FST, SMPDL3A, AHSG, APOA4, IL6ST, ADAMTS9, ADAMTS18, AFP, LUM, FGA, APOA1, COL4A1, COL5A1, PRSS35, SPARC, LNPEP, FGG, IGFBP3, FIGF, OLFML3, MGP, IGF2, NTN4, PCSK5, APOB, ANGPT1, FGFBP3, APOC3, PTN, RELN, TGFBR3, APOA2, SFRP1, COL3A1, LAMA1, COL15A1, ERAP1, KITLG, GALNT1, SERPINF1, LIFR, REN, FN1, SPON1…	498	1440	17599	1.64426	0.0613955	0.0028759	0.0946306
SP_PIR_KEYWORDS	signal	116	0.2079	8.29278e-05	DCBLD2, SERPINA1, ZNRF3, COL14A1, CTSC, TNFRSF19, GREM1, FGFR2, SPP1, FGB, TDGF1, PLAT, LRIG1, DCT, NID2, FST, SMPDL3A, ADAMTS9, IL6ST, AFP, SEL1L, APOA1, COL5A1, HGF, SPARC, ROR1, IGFBP3, THBD, CACHD1, FIGF, MGP, NTN4, SSR1, ANGPT1, APOB, FKBP11, FGFBP3, FLRT2, TMEM123, LAMA1, METTL7A, EPHA4, REN, LIFR, GPC3, FN1, F2RL1, TMED2, HSP90B1, COL21A1, PPBP, LGR5, POSTN, CYYR1, JAG1, FOLR1, CRISPLD2, L…	498	2919	17599	1.40437	0.0846097	0.00352994	0.132009
SP_PIR_KEYWORDS	cell adhesion	24	0.043	0.000657045	LAMA1, DSC3, COL15A1, PKP4, KITLG, PVRL3, COL6A3, COL14A1, MCAM, FN1, SPON1, PGM5, RELN, PCDH8, MYBPC1, SPP1, DSC2, DSG2, PKP2, CDH1, POSTN, FLRT2, FREM2, NID2,	498	386	17599	2.19727	0.503733	0.0230841	1.04145
SP_PIR_KEYWORDS	sterol biosynthesis	7	0.0125	5.51715e-05	DHCR24, HMGCS1, FDFT1, HMGCR, SC4MOL, CYP51A1, SC5DL,	498	25	17599	9.89502	0.0571183	0.00279677	0.0878432
SP_PIR_KEYWORDS	steroid biosynthesis	7	0.0125	0.000466388	DHCR24, HMGCS1, FDFT1, HMGCR, SC4MOL, CYP51A1, SC5DL,	498	36	17599	6.87154	0.391821	0.0182494	0.740301
SP_PIR_KEYWORDS	lipid synthesis	10	0.0179	0.000773468	SCD, ELOVL2, DHCR24, HMGCS1, FDFT1, ELOVL6, HMGCR, SC4MOL, CYP51A1, SC5DL,	498	87	17599	4.062	0.561693	0.0254468	1.22492
SP_PIR_KEYWORDS	cholesterol biosynthesis	5	0.009	0.00173795	DHCR24, HMGCS1, FDFT1, HMGCR, CYP51A1,	498	19	17599	9.29983	0.843432	0.0464327	2.73265
SP_PIR_KEYWORDS	heparin-binding	7	0.0125	0.0067892	PTN, FGFR2, POSTN, APOB, COL5A1, LIPG, FN1,	498	60	17599	4.12293	0.999298	0.137744	10.283
SP_PIR_KEYWORDS	activator	24	0.043	0.00246818	BRWD1, EPAS1, TBL1XR1, LEF1, GATA6, PNRC2, THRAP3, ZNF367, CREB1, NCOA3, ATF7IP, EBF1, SOX6, NSBP1, DACH1, MITF, ZBTB38, PLAGL1, ZEB1, TCF7L2, TCF4, NFIB, ZFPM2, MYC,	498	427	17599	1.98629	0.928233	0.0607956	3.85981
SP_PIR_KEYWORDS	trimer	6	0.0108	0.00101038	COL3A1, RPA1, COL6A3, COL14A1, COL4A1, COL5A1,	498	28	17599	7.57272	0.659592	0.0311974	1.59729
SP_PIR_KEYWORDS	hydroxylation	8	0.0143	0.00193813	COL3A1, EPAS1, COL15A1, THBD, COL6A3, COL14A1, COL4A1, COL5A1,	498	63	17599	4.48754	0.873568	0.0503874	3.04286
SP_PIR_KEYWORDS	triple helix	6	0.0108	0.00217299	COL3A1, COL6A3, COL14A1, COL4A1, COL5A1, UTRN,	498	33	17599	6.42534	0.901621	0.0549894	3.40564
SP_PIR_KEYWORDS	structural protein	11	0.0197	0.00256642	COL3A1, COL15A1, PKP4, PKP2, DSP, COL6A3, COL14A1, EZR, COL4A1, COL5A1, UTRN,	498	123	17599	3.16043	0.935386	0.0617185	4.01052
SP_PIR_KEYWORDS	atp-binding	64	0.1147	3.70888e-07	ATAD2, PBK, MCM6, FGFR2, NEK2, KIF14, CDC42BPA, RRM1, ATP7B, KIF23, PRKD3, HSP90AA1, ATP2B1, THRAP3, CHD1, GLUD2, MCM4, CHEK1, CDK6, EPRS, HELLS, HSP90AB1, ROR1, TRIO, MELK, ATP1A2, MCM8, TOP2A, MASTL, BLM, CDC2, KIF20A, RFC4, IGF1R, TTK, DDX17, G3BP1, HSPD1, MYH10, CENPE, RFC3, NEK1, KIF15, SMC4, BUB1B, HSPH1, SMC5, VRK2, DICER1, WNK1, EPHA4, MTHFD1, KIF18A, PRPF4B, STK4, KIF2C, KIF11, BMPR1B, S…	498	1156	17599	1.9565	0.000395289	3.29467e-05	0.000590763
SP_PIR_KEYWORDS	nucleotide-binding	71	0.1272	1.49888e-05	ATAD2, RAB12, KRAS, PBK, MCM6, FGFR2, NEK2, KIF14, CDC42BPA, RRM1, ATP7B, KIF23, PRKD3, HSP90AA1, ATP2B1, THRAP3, CHD1, GLUD2, MCM4, CHEK1, CDK6, EPRS, HELLS, ROR1, HSP90AB1, RAB23, TRIO, MELK, ATP1A2, RAP2A, MCM8, TOP2A, BLM, MASTL, CDC2, KIF20A, RFC4, IGF1R, TTK, DDX17, G3BP1, HSPD1, MYH10, CENPE, RFC3, GNAS, NEK1, KIF15, SMC4, BUB1B, HSPH1, SMC5, ARL4C, VRK2, DICER1, WNK1, EPHA4, MTHFD1, KIF18…	498	1487	17599	1.68735	0.0158512	0.000939452	0.0238721
SP_PIR_KEYWORDS	Serine/threonine-protein kinase	21	0.0376	0.00640315	BUB1B, VRK2, MASTL, PRKD3, CDC2, WNK1, TTK, PBK, PRPF4B, STK4, CHEK1, BMPR1B, CDK6, NEK2, CDC42BPA, NEK1, BUB1, TRIO, MELK, RP6-213H19.1, PRKDC,	498	383	17599	1.93767	0.998938	0.135579	9.72593
SP_PIR_KEYWORDS	angiogenesis	7	0.0125	0.00123569	PTN, EPAS1, FIGF, NARG1, IGF2, COL15A1, ANGPT1,	498	43	17599	5.75292	0.732345	0.0349962	1.9502
SP_PIR_KEYWORDS	cell junction	20	0.0358	0.00112738	DSC3, PKP4, GABRB3, PPP1R9A, ERBB2IP, DLG1, TJP1, GJC1, PGM5, TJP2, DSC2, DSG2, CLDN11, MPDZ, PKP2, MPP5, CDH1, PSD3, PARD3, UTRN,	498	305	17599	2.31733	0.699548	0.0337727	1.78071
SP_PIR_KEYWORDS	intestine	6	0.0108	0.000708429	APOA4, APOA2, APOC1, APOA1, APOB, APOC3,	498	26	17599	8.15524	0.530202	0.0240749	1.12247
SP_PIR_KEYWORDS	blood coagulation	6	0.0108	0.00771755	ANXA8L2, FGG, SERPINA1, FGA, FGB, THBD,	498	44	17599	4.819	0.999741	0.149506	11.6094
UP_SEQ_FEATURE	short sequence motif:Antp-type hexapeptide	8	0.0143	7.2647e-06	HOXB7, HOXB8, HOXA5, HOXD4, HOXB6, HOXC6, HOXA7, HOXB3,	429	22	12056	10.2191	0.128066	0.128066	0.0157551
UP_SEQ_FEATURE	DNA-binding region:Homeobox	13	0.0233	0.0064493	HOXB9, HOXB8, HOXA5, HOXC9, PITX2, HOXC6, HOXB3, HOXB7, HOXA9, HOXD4, HOXB6, HOXA10, HOXA7,	429	148	12056	2.46847	1	0.997009	13.093
UP_SEQ_FEATURE	domain:Kinesin-motor	7	0.0125	0.000668756	KIF2C, KIF23, KIF11, CENPE, KIF20A, KIF14, KIF18A,	429	31	12056	6.34574	0.999997	0.877944	1.44047
UP_SEQ_FEATURE	repeat:HEAT 1	7	0.0125	0.000947434	NIPBL, KPNB1, TNPO1, SF3B1, NCAPG, EIF4G3, PRKDC,	429	33	12056	5.96115	1	0.862861	2.03486
UP_SEQ_FEATURE	repeat:HEAT 2	7	0.0125	0.000947434	NIPBL, KPNB1, TNPO1, SF3B1, NCAPG, EIF4G3, PRKDC,	429	33	12056	5.96115	1	0.862861	2.03486
UP_SEQ_FEATURE	repeat:HEAT 5	6	0.0108	0.00232955	NIPBL, KPNB1, TNPO1, SF3B1, NCAPG, EIF4G3,	429	27	12056	6.24501	1	0.981678	4.93262
UP_SEQ_FEATURE	repeat:HEAT 4	6	0.0108	0.00323299	NIPBL, KPNB1, TNPO1, SF3B1, NCAPG, EIF4G3,	429	29	12056	5.81432	1	0.993845	6.78239
UP_SEQ_FEATURE	repeat:HEAT 3	6	0.0108	0.00376844	NIPBL, KPNB1, TNPO1, SF3B1, NCAPG, EIF4G3,	429	30	12056	5.62051	1	0.980875	7.86244
UP_SEQ_FEATURE	nucleotide phosphate-binding region:ATP	48	0.086	6.26591e-05	MCM8, TOP2A, BLM, MASTL, CDC2, KIF20A, ATAD2, RFC4, IGF1R, TTK, PBK, DDX17, MCM6, FGFR2, MYH10, CENPE, NEK2, CDC42BPA, KIF14, NEK1, SMC4, BUB1B, KIF23, VRK2, DICER1, THRAP3, WNK1, EPHA4, CHD1, MTHFD1, KIF18A, PRPF4B, STK4, KIF2C, KIF11, MCM4, CHEK1, BMPR1B, SMC1A, CDK6, ROR1, MKI67, BUB1, TRIO, MELK, RP6-213H19.1, NTRK2, ATRX,	429	736	12056	1.83278	0.693347	0.325654	0.135812
UP_SEQ_FEATURE	domain:PDZ 1	6	0.0108	0.00376844	TJP1, TJP2, SLC9A3R1, MPDZ, PARD3, DLG1,	429	30	12056	5.62051	1	0.980875	7.86244
UP_SEQ_FEATURE	domain:PDZ 2	6	0.0108	0.00376844	TJP1, TJP2, SLC9A3R1, MPDZ, PARD3, DLG1,	429	30	12056	5.62051	1	0.980875	7.86244
UP_SEQ_FEATURE	domain:PDZ 3	5	0.009	0.00579934	TJP1, TJP2, MPDZ, PARD3, DLG1,	429	21	12056	6.69109	1	0.995855	11.8515
