# Supplementary material for: Identification of Thalidomide-Specific Transcriptomics and Proteomics Signatures during Differentiation of Human Embryonic Stem Cells
Source: PLoS One. 2012 Aug 28;7(8):e44228. doi: 10.1371/journal.pone.0044228 (PMC3429450; doi:10.1371/journal.pone.0044228)
Supplement: Table S8 — The 6 regulated protein spots, identified from 2DE using mass spectrometry, for thalidomide treatment. (XLS) [file pone.0044228.s012.xls]

## Sheet: Table S8
Spot ID		Protein Name		Score	Mass	Matches	Sequences	emPAI	Protein description	% V														C
			Gene Symbol							14 day old EBs			Average	Thalidomide			Average	Fold change	Regulation
23612	1.1	RANG_HUMAN	RANBP1	231	23296	10 (10)	7 (7)	2.35	Ran-specific GTPase-activating protein OS=Homo	0.0938	0.0896	0.0914	0.0916	0.0729	0.0719	0.0675	0.0707667	-1.29439	Down
23705	1.1	GSTP1_HUMAN	GSTP1	192	23341	7 (5)	7 (5)	0.96	Glutathione S-transferase P OS=Homo sapiens	0.0752	0.0701	0.0847	0.0766667	0.0527	0.0545	0.0554	0.0542	-1.41451	Down
23397	1.1	ANXA5_HUMAN	ANXA5	312	35914	24 (16)	19 (14)	3.1	Annexin A5 OS=Homo sapiens GN=ANXA5 PE	0.042	0.0482	0.0496	0.0466	0.0354	0.0292	0.0317	0.0321	-1.45171	Down
23481	1.1	DDAH2_HUMAN	DDAH2	90	29625	7 (3)	7 (3)	0.38	N(G),N(G)-dimethylarginine dimethylaminohydrolase 2 OS=Homo sapiens GN=DDAH2 PE=1 SV=1	0.0235	0.025	0.0265	0.025	0.0128	0.0105	0.0158	0.0130333	-1.91816	Down
23251	1.1	RPR1B_HUMAN	RPRD1B	248	36877	12 (7)	11 (7)	0.83	Regulation of nuclear pre-mRNA domain-containing	0.1808	0.1472	0.2043	0.177433	0.1087	0.1367	0.1029	0.1161	-1.52828	Down
23465	2.1	CATD_HUMAN	CTSD	136	44524	8 (4)	8 (4)	0.33	Cathepsin D OS=Homo sapiens GN=CTSD PE	0.0886	0.0906	0.106	0.0950667	0.0645	0.0718	0.077	0.0711	-1.33708	Down
